# Supplementary material
Source: MDPI journal article supplement (https://www.mdpi.com/1999-4907/15/4/618)
Supplement: s1 [file s1]

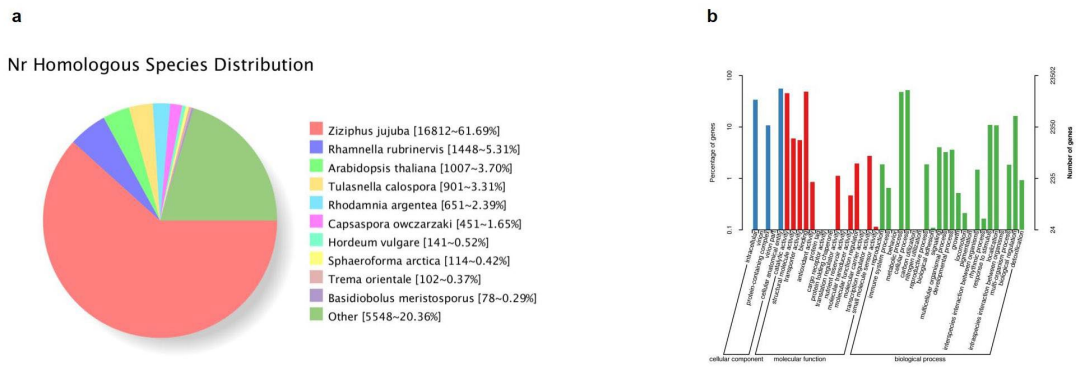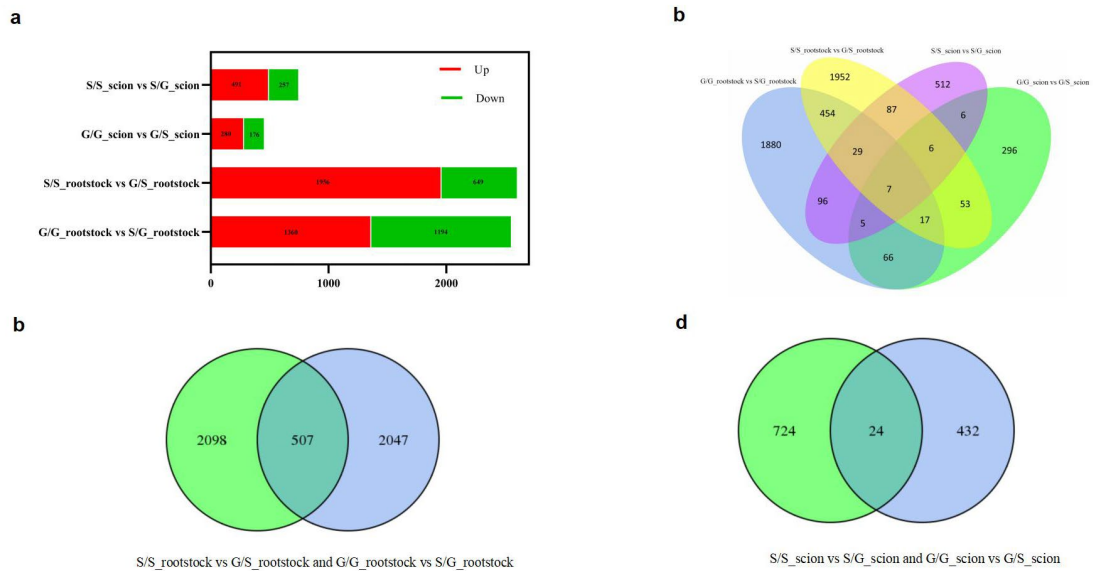

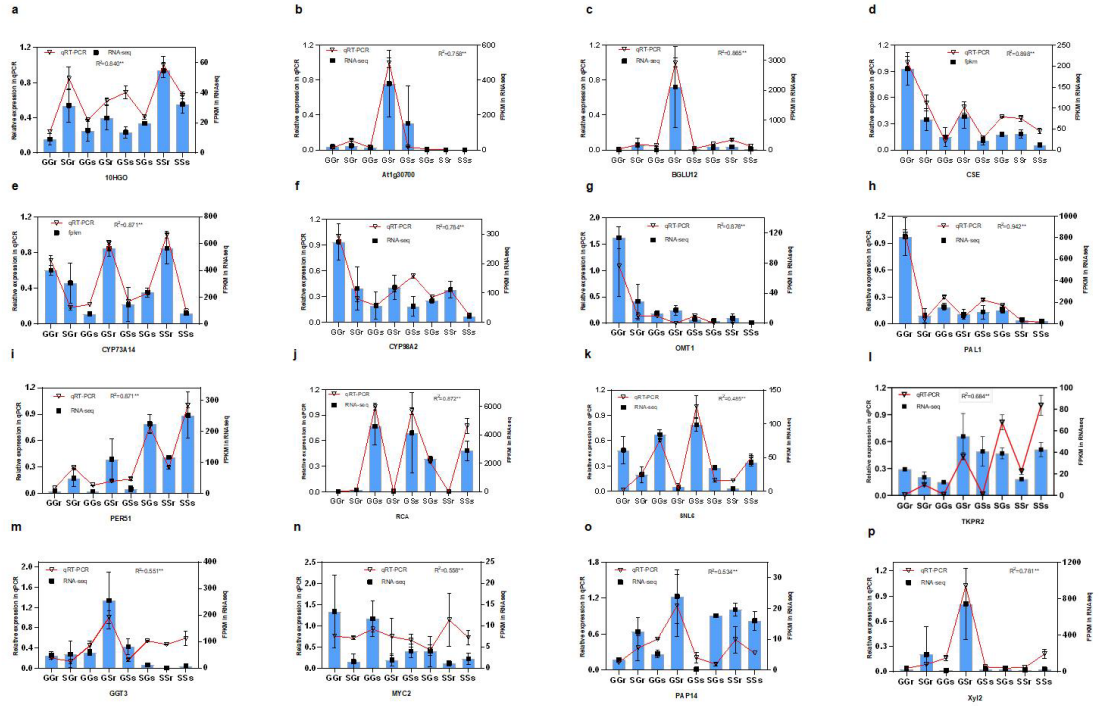

**Figure S3.** Correlation analysis between qRT-PCR and RNA-seq. The analysis between qRT-PCR and RNA-seq Results for random subset of 16 genes (a-p).

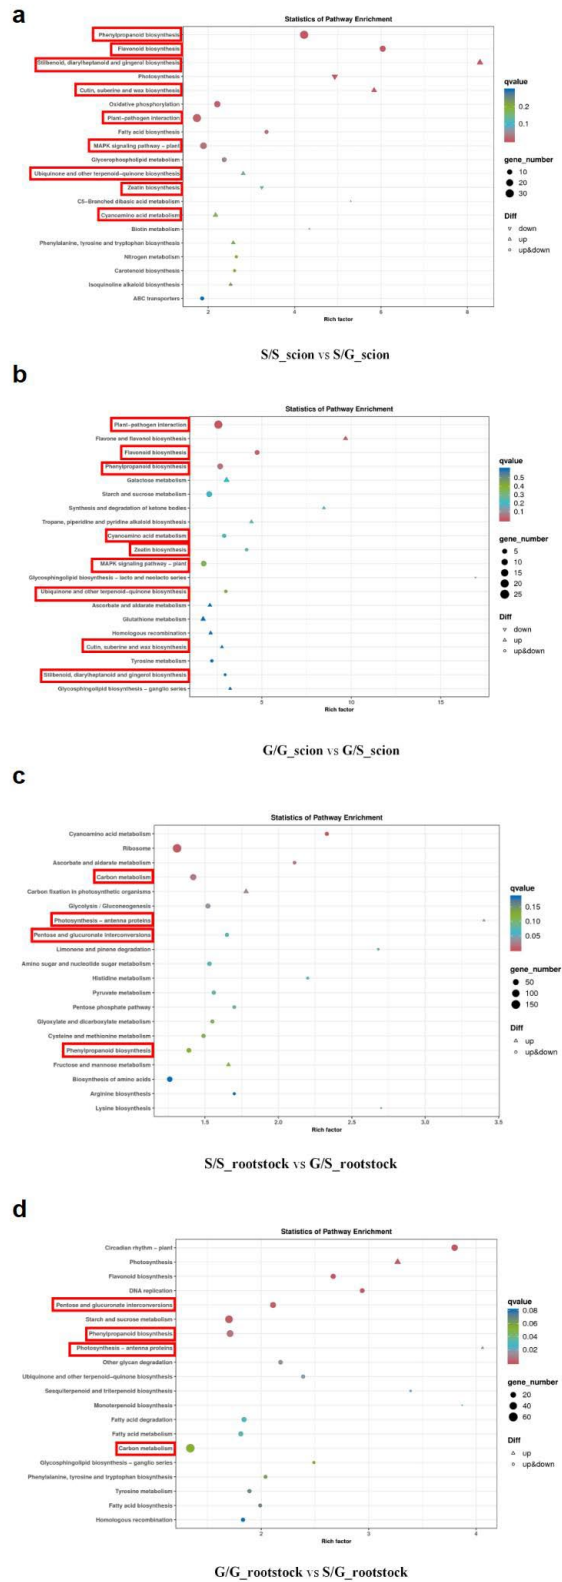

**Figure S4.** Enrichment analysis on KEGG pathways. (a–d) The top 20 pathway with highest level were exhibited according to the amount and enrichment level of DEGs annotated in the comparing groups.



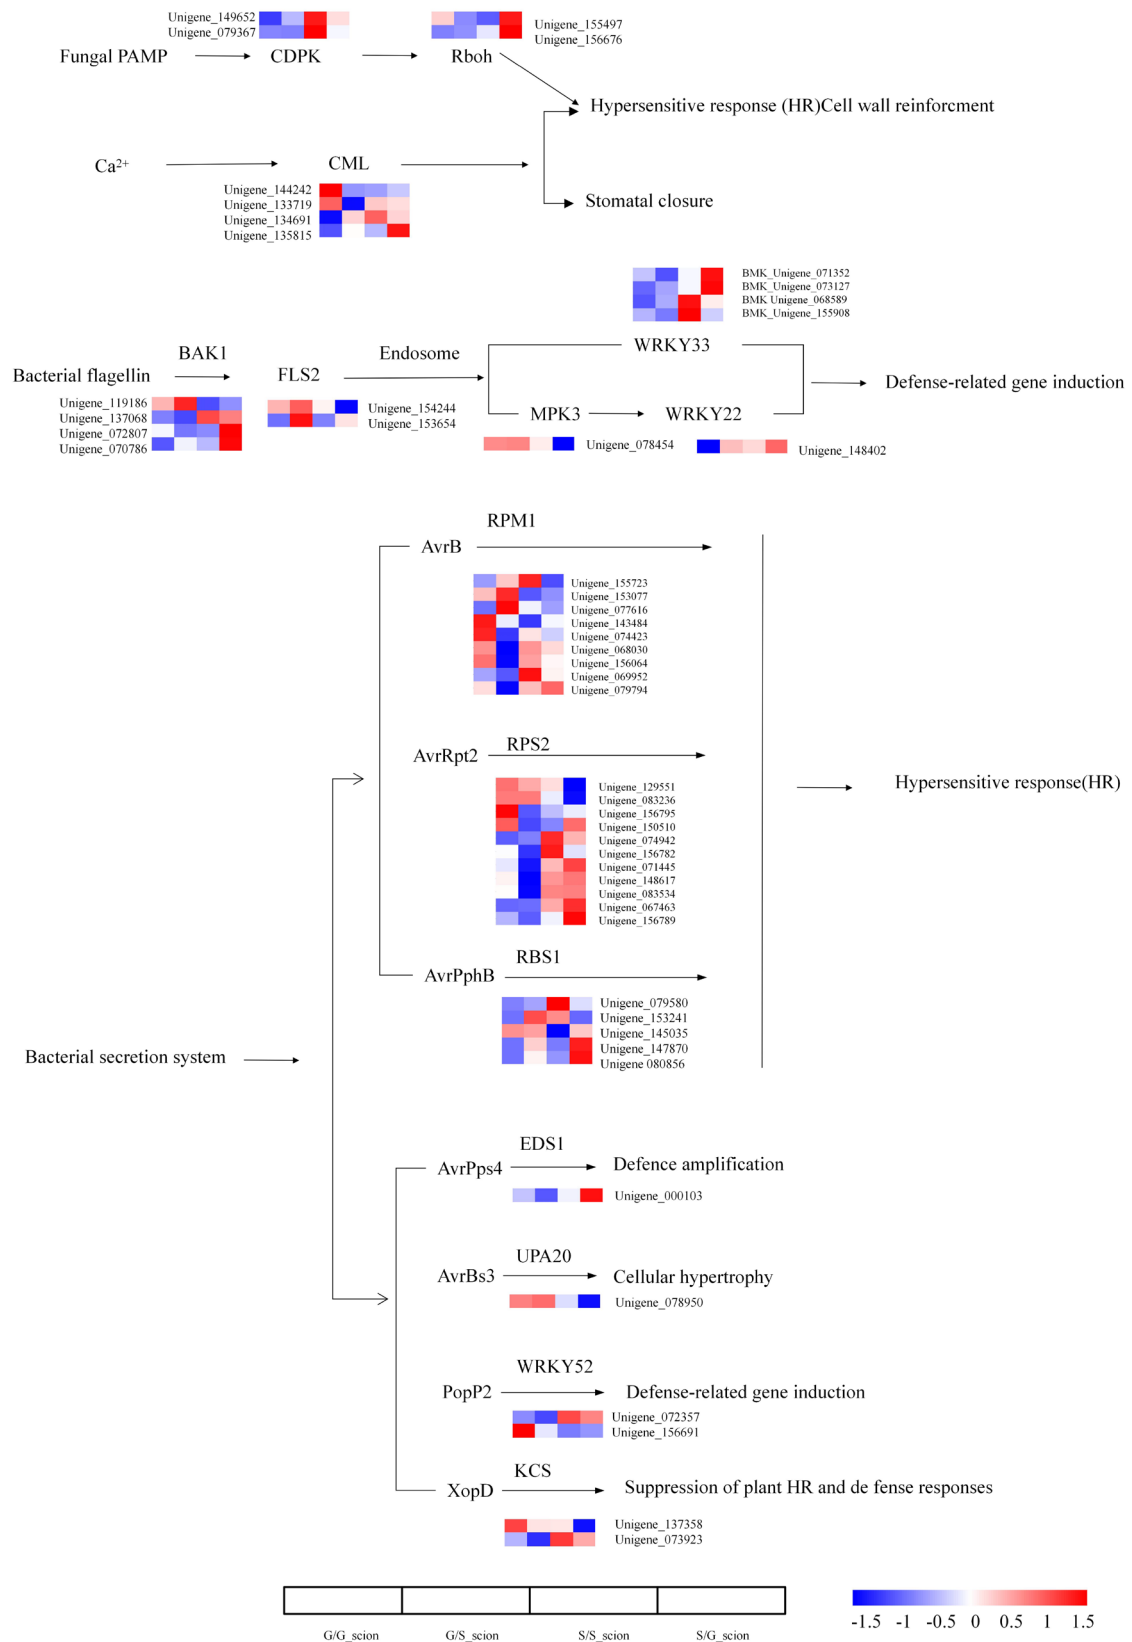

**Figure S7.** Analysis of differentially expressed genes in the pathways of plant-pathogen interaction. The color scale represents log<sub>2</sub>-transformed FPKM (fragments per kilobase of exon per million mapped reads) values. Red represents high expression, and blue represents low expression.

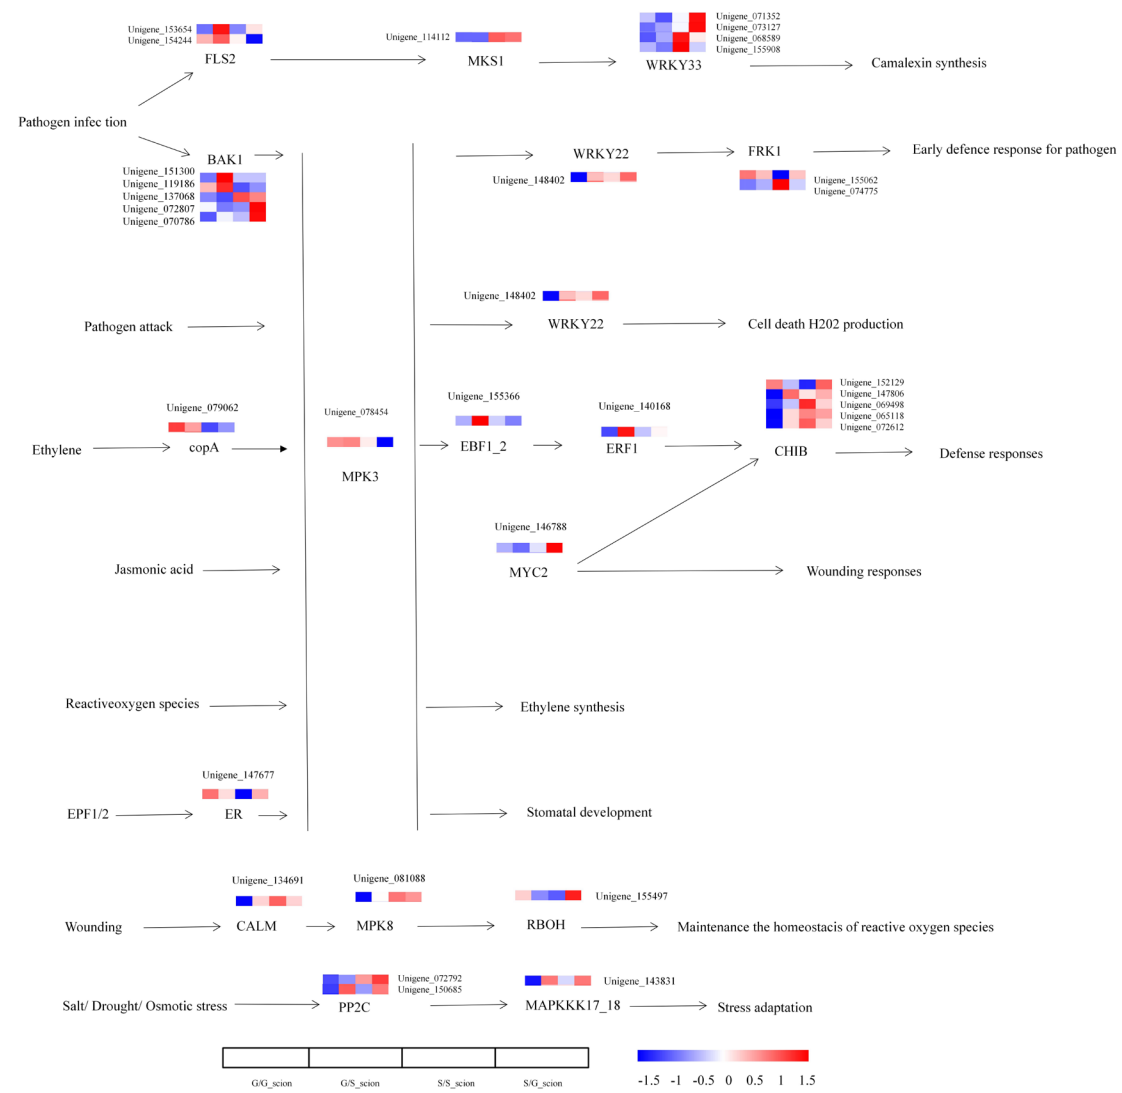

**Figure S8.** Analysis of differentially expressed genes in the pathways of MAPK signaling. The color scale represents  $\log^2$ -transformed FPKM (fragments per kilobase of exon per million mapped reads) values. Red represents high expression, and blue represents low expression.

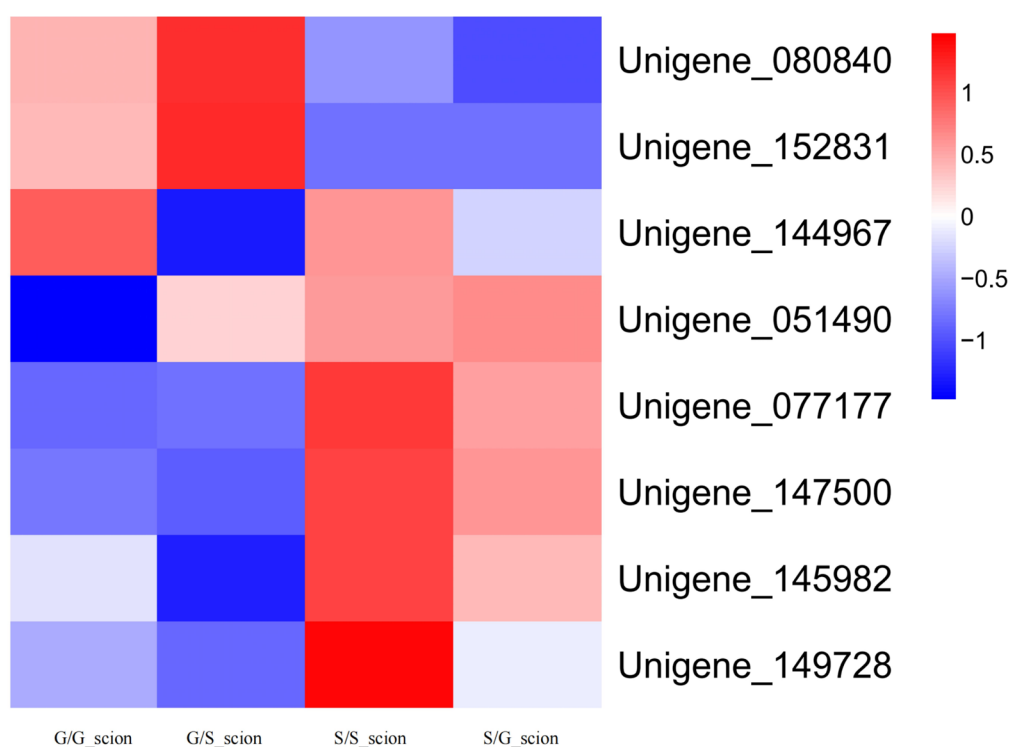

**Figure S9.** Analysis of differentially expressed genes in the pathways of Zeatin biosynthesis. The color scale represents log<sup>2</sup>-transformed FPKM (fragments per kilobase of exon per million mapped reads) values. Red represents high expression, and blue represents low expression.
