# Supplementary material
Source: MDPI journal article supplement (https://www.mdpi.com/1999-4907/15/4/618)
Supplement: s1 [file s1]

Archive with 15 entries (15 files):
- Supplementary Figures.pdf
- Supplementary Table S1.xlsx
- Supplementary Table S10.xlsx
- Supplementary Table S11.xlsx
- Supplementary Table S12.xlsx
- Supplementary Table S13.xlsx
- Supplementary Table S14.xlsx
- Supplementary Table S2.xlsx
- Supplementary Table S3.xlsx
- Supplementary Table S4.xlsx
- Supplementary Table S5.xlsx
- Supplementary Table S6.xlsx
- Supplementary Table S7.xlsx
- Supplementary Table S8.xlsx
- Supplementary Table S9.xlsx
