# Supplementary material
Source: MDPI journal article supplement (https://www.mdpi.com/1999-4907/15/4/618)
Supplement: s1 [file s1 › Supplementary Table S1.xlsx]

## Sheet: scion
Supplementary Table S1:Growth parameters and biomass attributes of different grafting combinations
data of scions
sample	scion diameter(mm)	scion length(mm)	Scion projected Area(cm2)	scion weight(g)
G/G_scion	1.44	161.6	25.1895	0.57
G/G_scion	1.44	162.3	24.8458	0.53
G/G_scion	1.43	163.32	24.2278	0.62
G/S_scion	1.77	117.2	17.5331	0.56
G/S_scion	1.72	111.2	17.4567	0.57
G/S_scion	1.72	110.1	17.4219	0.55
S/S_scion	1.26	96.2	5.1148	0.25
S/S_scion	1.25	96.2	7.1675	0.24
S/S_scion	1.24	94.9	7.0853	0.29
S/G_scion	1.31	66.3	7.6674	0.24
S/G_scion	1.39	65.8	7.2833	0.28
S/G_scion	1.33	67.2	6.7335	0.23
data of rootstocks
sample	rootstock diameter (mm)	rootstock length (mm)	rootstock projected area(cm2)	rootstock weight(g)	rootstock root volume(cm3 )	rootstock surface area(cm2)	rootstock average diameter(mm)	rootstock tips
G/G_rootstock	1.59	265.2	6.4156	0.39	0.221	20.1552	0.4228	183
G/G_rootstock	1.58	256.5	6.4431	0.38	0.232	20.2414	0.4368	184
G/G_rootstock	1.54	234.7	6.4674	0.32	0.24	20.3179	0.4425	186
S/G_rootstock	1.59	223.6	6.3632	0.24	0.247	18.2776	0.4319	135
S/G_rootstock	1.58	213.5	7.1257	0.28	0.282	19.9905	0.4318	193
S/G_rootstock	1.57	195.8	8.3003	0.29	0.282	22.3862	0.461	227
S/S_rootstock	1.26	207.5	3.3242	0.29	0.121	10.4587	0.4534	133
S/S_rootstock	1.25	205.2	3.3378	0.28	0.123	10.9118	0.4688	135
S/S_rootstock	1.25	204.1	3.3291	0.27	0.137	10.9832	0.4787	136
G/S_rootstock	1.28	225.6	3.6907	0.37	0.141	11.5947	0.4351	143
G/S_rootstock	1.28	225.2	4.6676	0.36	0.17	14.6636	0.453	159
G/S_rootstock	1.27	217.3	4.6833	0.34	0.178	14.7131	0.4649	177
