# Supplementary material
Source: MDPI journal article supplement (https://www.mdpi.com/1999-4907/15/4/618)
Supplement: s1 [file s1 › Supplementary Table S2.xlsx]

## Sheet: Sheet1
Supplementary Table S2:Unigenes annotated across eight major databases
#GeneID	COG_class	COG_class_annotation	GO_annotation	KEGG_annotation	KOG_class	KOG_class_annotation	Pfam_annotation	Swissprot_annotation	TrEMBL_annotation	eggNOG_class	eggNOG_class_annotation	nr_annotation
BMK_Unigene_312700	--	--	Biological Process: mitotic cell cycle (GO:0000278);; Molecular Function: molecular_function (GO:0003674);; Molecular Function: binding (GO:0005488);; Molecular Function: protein binding (GO:0005515);; Cellular Component: cellular_component (GO:0005575);; Cellular Component: intracellular (GO:0005622);; Cellular Component: obsolete cell (GO:0005623);; Cellular Component: cytoplasm (GO:0005737);; …	--	--	--	--	--	Uncharacterized protein (Fragment) OS=Beta vulgaris subsp. vulgaris OX=3555 GN=BVRB_039610 PE=4 SV=1	O	Posttranslational modification, protein turnover, chaperones	putative clathrin heavy chain 1 [Moniliophthora roreri]
BMK_Unigene_138130	[O]	Posttranslational modification, protein turnover, chaperones	Cellular Component: extracellular space (GO:0005615);;	K13963|4.1e-102|gmx:100806180|K13963 serpin B | (RefSeq) serpin-ZX	[V]	Defense mechanisms	Serpin (serine protease inhibitor)	Serpin-ZXA OS=Oryza sativa subsp. japonica OX=39947 GN=Os03g0610650 PE=1 SV=1	Serpin family OS=Trema orientale OX=63057 GN=TorRG33x02_108100 PE=3 SV=1	V	Defense mechanisms	serpin-ZXA-like [Ziziphus jujuba]
BMK_Unigene_194432	--	--	--	--	--	--	Filamin/ABP280 repeat	--	--	--	--	--
BMK_Unigene_066066	--	--	--	--	[D]	Cell cycle control, cell division, chromosome partitioning	--	--	Thyroid adenoma-associated-like protein OS=Trema orientale OX=63057 GN=TorRG33x02_265000 PE=4 SV=1	D	Cell cycle control, cell division, chromosome partitioning	thyroid adenoma-associated protein homolog isoform X1 [Ziziphus jujuba]
BMK_Unigene_154962	[H]	Coenzyme transport and metabolism	Molecular Function: O-methyltransferase activity (GO:0008171);; Molecular Function: RNA methyltransferase activity (GO:0008173);;	K20798|0.0e+00|pavi:110758633|K20798 small RNA 2'-O-methyltransferase [EC:2.1.1.-] | (RefSeq) small RNA 2'-O-methyltransferase-like	[S]	Function unknown	Double-stranded RNA binding domain 2;; Hen1 La-motif C-terminal domain;; Methyltransferase domain;; Methyltransferase domain;; Methyltransferase domain	Small RNA 2'-O-methyltransferase OS=Arabidopsis thaliana OX=3702 GN=HEN1 PE=1 SV=1	Small RNA 2'-O-methyltransferase OS=Morus notabilis OX=981085 GN=L484_025986 PE=3 SV=1	S	Function unknown	small RNA 2'-O-methyltransferase [Morus notabilis]
BMK_Unigene_003541	[T]	Signal transduction mechanisms	Molecular Function: protein serine/threonine kinase activity (GO:0004674);; Molecular Function: ATP binding (GO:0005524);; Cellular Component: integral component of membrane (GO:0016021);; Biological Process: recognition of pollen (GO:0048544);;	K24104|1.1e-78|thj:104799061|K24104 GPN-loop GTPase | (RefSeq) LOW QUALITY PROTEIN: uncharacterized protein LOC104799061	--	--	Protein tyrosine and serine/threonine kinase;; Protein kinase domain;; D-mannose binding lectin;; S-locus glycoprotein domain;; PAN-like domain;; Domain of unknown function (DUF3403)	G-type lectin S-receptor-like serine/threonine-protein kinase At4g27290 OS=Arabidopsis thaliana OX=3702 GN=At4g27290 PE=3 SV=4	Receptor-like serine/threonine-protein kinase OS=Parasponia andersonii OX=3476 GN=PanWU01x14_226960 PE=3 SV=1	T	Signal transduction mechanisms	G-type lectin S-receptor-like serine/threonine-protein kinase At4g27290 isoform X1 [Ziziphus jujuba]
BMK_Unigene_142117	[I]	Lipid transport and metabolism	Biological Process: lipid metabolic process (GO:0006629);; Molecular Function: phospholipase A1 activity (GO:0008970);;	K16818|4.3e-38|lsv:111906024|K16818 phospholipase A1 [EC:3.1.1.32] | (RefSeq) phospholipase A(1) DAD1, chloroplastic-like	[I]	Lipid transport and metabolism	Lipase (class 3)	Phospholipase A1-IIgamma OS=Arabidopsis thaliana OX=3702 GN=DSEL PE=1 SV=1	Lipase_3 domain-containing protein OS=Malus baccata OX=106549 GN=C1H46_037495 PE=3 SV=1	I	Lipid transport and metabolism	phospholipase A1-IIgamma-like [Ziziphus jujuba]
BMK_Unigene_167122	--	--	--	--	[Z]	Cytoskeleton	--	--	--	--	--	--
BMK_Unigene_264558	[J]	Translation, ribosomal structure and biogenesis	Molecular Function: helicase activity (GO:0004386);; Molecular Function: ATP binding (GO:0005524);;	K12813|1.7e-44|soe:110794845|K12813 pre-mRNA-splicing factor ATP-dependent RNA helicase DHX16 [EC:3.6.4.13] | (RefSeq) pre-mRNA-splicing factor ATP-dependent RNA helicase DEAH1-like	[A]	RNA processing and modification	Helicase conserved C-terminal domain	Pre-mRNA-splicing factor ATP-dependent RNA helicase DEAH1 OS=Arabidopsis thaliana OX=3702 GN=ESP3 PE=1 SV=1	Uncharacterized protein (Fragment) OS=Nymphaea colorata OX=210225 GN=NYM_LOCUS6244 PE=4 SV=1	A	RNA processing and modification	Helicase [Macleaya cordata]
BMK_Unigene_075509	--	--	Biological Process: phloem development (GO:0010088);;	--	--	--	Sieve element occlusion N-terminus;; Sieve element occlusion C-terminus	Protein SIEVE ELEMENT OCCLUSION B OS=Arabidopsis thaliana OX=3702 GN=SEOB PE=1 SV=1	Sieve element occlusion OS=Trema orientale OX=63057 GN=TorRG33x02_239300 PE=4 SV=1	S	Function unknown	protein SIEVE ELEMENT OCCLUSION B-like [Ziziphus jujuba]
BMK_Unigene_156300	[M]	Cell wall/membrane/envelope biogenesis	Molecular Function: protein kinase activity (GO:0004672);; Molecular Function: ATP binding (GO:0005524);; Cellular Component: integral component of membrane (GO:0016021);;	K13430|4.7e-64|dct:110101514|K13430 serine/threonine-protein kinase PBS1 [EC:2.7.11.1] | (RefSeq) serine/threonine-protein kinase PBS1	--	--	Protein tyrosine and serine/threonine kinase;; Protein kinase domain;; Leucine rich repeat	Protein STRUBBELIG-RECEPTOR FAMILY 3 OS=Arabidopsis thaliana OX=3702 GN=SRF3 PE=1 SV=1	Tyrosine-protein kinase OS=Trema orientale OX=63057 GN=TorRG33x02_008570 PE=4 SV=1	T	Signal transduction mechanisms	protein STRUBBELIG-RECEPTOR FAMILY 3-like isoform X1 [Ziziphus jujuba]
BMK_Unigene_095162	--	--	--	--	[PT]	--	--	--	--	--	--	--
BMK_Unigene_017537	[G]	Carbohydrate transport and metabolism	Cellular Component: integral component of membrane (GO:0016021);; Molecular Function: transmembrane transporter activity (GO:0022857);; Biological Process: transmembrane transport (GO:0055085);;	K24193|6.1e-13|cann:107868487|K24193 MFS transporter, SP family, sugar:H+ symporter | (RefSeq) sugar transport protein 8-like	[G]	Carbohydrate transport and metabolism	Sugar (and other) transporter	Sugar transporter ERD6-like 6 OS=Arabidopsis thaliana OX=3702 GN=At1g75220 PE=1 SV=1	MFS domain-containing protein OS=Phytophthora fragariae OX=53985 GN=PF006_g28757 PE=3 SV=1	P	Inorganic ion transport and metabolism	LOW QUALITY PROTEIN: glucose transporter type 1-like [Rhodamnia argentea]
BMK_Unigene_119089	--	--	--	--	[S]	Function unknown	Polysaccharide biosynthesis	--	UPF0368 protein Cxorf26 (Fragment) OS=Anthurium amnicola OX=1678845 GN=CX026_0 PE=4 SV=1	--	--	hypothetical protein M407DRAFT_242343 [Tulasnella calospora MUT 4182]
BMK_Unigene_310551	--	--	Cellular Component: nucleus (GO:0005634);; Biological Process: intracellular protein transport (GO:0006886);; Molecular Function: Ran GTPase binding (GO:0008536);;	K20223|3.3e-10|boe:106336116|K20223 importin-7 | (RefSeq) importin beta-like SAD2 isoform X1	[YU]	--	--	--	Importin N-terminal domain-containing protein OS=Carpinus fangiana OX=176857 GN=FH972_021871 PE=4 SV=1	--	--	importin-7-like [Rhodamnia argentea]
BMK_Unigene_147724	--	--	Molecular Function: protein binding (GO:0005515);;	K10268|9.1e-191|zju:107426442|K10268 F-box and leucine-rich repeat protein 2/20 | (RefSeq) F-box protein SKIP17-like	[R]	General function prediction only	F-box-like	F-box protein At4g02760 OS=Arabidopsis thaliana OX=3702 GN=At4g02760 PE=4 SV=2	F-box domain-containing protein OS=Prunus persica OX=3760 GN=PRUPE_8G239400 PE=4 SV=1	S	Function unknown	F-box protein SKIP17-like [Ziziphus jujuba]
BMK_Unigene_161067	--	--	Molecular Function: RNA binding (GO:0003723);;	--	[R]	General function prediction only	--	Polyadenylate-binding protein RBP45B OS=Arabidopsis thaliana OX=3702 GN=RBP45B PE=1 SV=1	RBP45B OS=Arabidopsis thaliana OX=3702 GN=AXX17_At1g11980 PE=4 SV=1	A	RNA processing and modification	RNA-binding (RRM/RBD/RNP motifs) family protein [Arabidopsis thaliana]
BMK_Unigene_143217	--	--	Molecular Function: molecular_function (GO:0003674);; Molecular Function: DNA-binding transcription factor activity (GO:0003700);; Cellular Component: cellular_component (GO:0005575);; Cellular Component: intracellular (GO:0005622);; Cellular Component: obsolete cell (GO:0005623);; Cellular Component: nucleus (GO:0005634);; Cellular Component: cytoplasm (GO:0005737);; Cellular Component: endoplas…	--	--	--	bZIP transcription factor;; Basic region leucine zipper	bZIP transcription factor 60 OS=Arabidopsis thaliana OX=3702 GN=BZIP60 PE=1 SV=1	BZIP transcription factor 60 OS=Morus notabilis OX=981085 GN=L484_024790 PE=4 SV=1	L	Replication, recombination and repair	bZIP transcription factor 60 [Ziziphus jujuba]
BMK_Unigene_123546	--	--	Molecular Function: RNA binding (GO:0003723);; Molecular Function: RNA helicase activity (GO:0003724);; Molecular Function: RNA-directed 5'-3' RNA polymerase activity (GO:0003968);; Biological Process: transcription, DNA-templated (GO:0006351);;	--	--	--	RNA helicase;; Cricket paralysis virus, VP4	--	--	--	--	--
BMK_Unigene_146628	[G]	Carbohydrate transport and metabolism	--	--	[G]	Carbohydrate transport and metabolism	BadF/BadG/BcrA/BcrD ATPase family	--	GlcNAc kinase OS=Parasponia andersonii OX=3476 GN=PanWU01x14_181360 PE=3 SV=1	G	Carbohydrate transport and metabolism	N-acetyl-D-glucosamine kinase-like isoform X2 [Ziziphus jujuba]
BMK_Unigene_076636	--	--	--	--	--	--	Protein of unknown function, DUF538	--	Uncharacterized protein OS=Populus alba OX=43335 GN=D5086_0000048480 PE=4 SV=1	S	Function unknown	uncharacterized protein LOC107431854 [Ziziphus jujuba]
BMK_Unigene_143499	[O]	Posttranslational modification, protein turnover, chaperones	Molecular Function: protein disulfide isomerase activity (GO:0003756);; Cellular Component: endoplasmic reticulum (GO:0005783);; Biological Process: cell redox homeostasis (GO:0045454);;	K09584|5.2e-47|zju:107426382|K09584 protein disulfide-isomerase A6 [EC:5.3.4.1] | (RefSeq) probable protein disulfide-isomerase A6	[O]	Posttranslational modification, protein turnover, chaperones	Thioredoxin	Protein disulfide isomerase-like 2-1 OS=Oryza sativa subsp. japonica OX=39947 GN=PDIL2-1 PE=2 SV=2	Protein disulfide-isomerase OS=Morus notabilis OX=981085 GN=L484_001906 PE=3 SV=1	O	Posttranslational modification, protein turnover, chaperones	probable protein disulfide-isomerase A6 [Ziziphus jujuba]
BMK_Unigene_150018	--	--	Cellular Component: cytoplasm (GO:0005737);; Molecular Function: protein-lysine N-methyltransferase activity (GO:0016279);;	K22856|3.3e-80|zju:107417100|K22856 EEF1A lysine methyltransferase 2 [EC:2.1.1.-] | (RefSeq) EEF1A lysine methyltransferase 2 isoform X1	[R]	General function prediction only	--	--	Protein-lysine N-methyltransferase TorRG33x02_290900 OS=Trema orientale OX=63057 GN=TorRG33x02_290900 PE=3 SV=1	J	Translation, ribosomal structure and biogenesis	EEF1A lysine methyltransferase 2 isoform X1 [Ziziphus jujuba]
BMK_Unigene_310447	[FGR]	--	Molecular Function: catalytic activity (GO:0003824);;	--	[T]	Signal transduction mechanisms	HIT domain;; Scavenger mRNA decapping enzyme C-term binding	Adenylylsulfatase HINT1 OS=Arabidopsis thaliana OX=3702 GN=HINT1 PE=1 SV=1	HIT domain-containing protein OS=Porphyra umbilicalis OX=2786 GN=BU14_0666s0010 PE=4 SV=1	T	Signal transduction mechanisms	hypothetical protein BU14_0666s0010 [Porphyra umbilicalis]
BMK_Unigene_147824	--	--	Molecular Function: RNA polymerase II cis-regulatory region sequence-specific DNA binding (GO:0000978);; Molecular Function: DNA-binding transcription factor activity, RNA polymerase II-specific (GO:0000981);; Cellular Component: nucleus (GO:0005634);; Biological Process: regulation of transcription by RNA polymerase II (GO:0006357);;	--	[K]	Transcription	KNOX2 domain;; KNOX1 domain;; Homeobox KN domain;; ELK domain;; Homeodomain	Homeobox protein knotted-1-like 2 OS=Malus domestica OX=3750 PE=2 SV=1	KNOTTED-like from OS=Theobroma cacao OX=3641 GN=TCM_034627 PE=3 SV=1	K	Transcription	homeobox protein knotted-1-like 2 [Ziziphus jujuba]
BMK_Unigene_225608	[E]	Amino acid transport and metabolism	Molecular Function: aminopeptidase activity (GO:0004177);; Molecular Function: metallopeptidase activity (GO:0008237);; Molecular Function: zinc ion binding (GO:0008270);;	K08776|9.3e-14|ats:109775281|K08776 puromycin-sensitive aminopeptidase [EC:3.4.11.-] | (RefSeq) LOC109775281; aminopeptidase M1-A	[EO]	--	Peptidase family M1 domain	Aminopeptidase M1-C OS=Oryza sativa subsp. japonica OX=39947 GN=Os09g0362500 PE=2 SV=2	Aminopeptidase OS=Punica granatum OX=22663 GN=CRG98_007527 PE=3 SV=1	--	--	hypothetical protein CDL15_Pgr015583 [Punica granatum]
BMK_Unigene_126714	[C]	Energy production and conversion	Molecular Function: cytochrome-c oxidase activity (GO:0004129);; Cellular Component: mitochondrial inner membrane (GO:0005743);; Biological Process: oxidative phosphorylation (GO:0006119);; Biological Process: aerobic respiration (GO:0009060);; Cellular Component: integral component of membrane (GO:0016021);; Molecular Function: heme binding (GO:0020037);; Cellular Component: respiratory chain co…	K02256|1.9e-132|bvg:809579|K02256 cytochrome c oxidase subunit 1 [EC:7.1.1.9] | (RefSeq) cox1, BevupMp090; cytochrome c oxidase subunit 1	[C]	Energy production and conversion	--	Cytochrome c oxidase subunit 1 OS=Beta vulgaris OX=161934 GN=COX1 PE=3 SV=2	Cytochrome c oxidase subunit 1 (Fragment) OS=Lingulodinium polyedra OX=160621 GN=COX1 PE=3 SV=1	C	Energy production and conversion	cytochrome c oxidase subunit I, partial [Lingulodinium polyedra]
BMK_Unigene_114718	[C]	Energy production and conversion	Biological Process: ATP synthesis coupled proton transport (GO:0015986);; Cellular Component: proton-transporting ATP synthase complex, catalytic core F(1) (GO:0045261);; Molecular Function: proton-transporting ATP synthase activity, rotational mechanism (GO:0046933);;	K02136|7.4e-17|qsu:112009698|K02136 F-type H+-transporting ATPase subunit gamma | (RefSeq) ATP synthase subunit gamma, mitochondrial-like	[C]	Energy production and conversion	ATP synthase	ATP synthase subunit gamma, mitochondrial OS=Arabidopsis thaliana OX=3702 GN=ATPC PE=1 SV=1	ATP synthase subunit gamma (Fragment) OS=Anthurium amnicola OX=1678845 GN=ATPsyn-gamma_1 PE=3 SV=1	--	--	ATP synthase F1, gamma subunit [Cryptococcus depauperatus CBS 7841]
BMK_Unigene_066366	--	--	--	--	--	--	--	--	Uncharacterized protein (Fragment) OS=Mucuna pruriens OX=157652 GN=CR513_24185 PE=4 SV=1	--	--	hypothetical protein CR513_24185, partial [Mucuna pruriens]
BMK_Unigene_073614	[C]	Energy production and conversion	Biological Process: tricarboxylic acid cycle (GO:0006099);; Molecular Function: phosphoenolpyruvate carboxylase activity (GO:0008964);; Biological Process: carbon fixation (GO:0015977);;	K01595|6.0e-50|zju:107432540|K01595 phosphoenolpyruvate carboxylase [EC:4.1.1.31] | (RefSeq) phosphoenolpyruvate carboxylase, housekeeping isozyme	--	--	Phosphoenolpyruvate carboxylase	Phosphoenolpyruvate carboxylase 3 OS=Arabidopsis thaliana OX=3702 GN=PPC3 PE=1 SV=2	Phosphoenolpyruvate carboxylase OS=Gossypium australe OX=47621 GN=EPI10_002723 PE=3 SV=1	C	Energy production and conversion	phosphoenolpyruvate carboxylase, housekeeping isozyme [Ziziphus jujuba]
BMK_Unigene_005585	--	--	Molecular Function: ATP binding (GO:0005524);; Molecular Function: transferase activity (GO:0016740);;	K10577|4.1e-13|thj:104801429|K10577 ubiquitin-conjugating enzyme E2 I | (RefSeq) SUMO-conjugating enzyme SCE1-like	[O]	Posttranslational modification, protein turnover, chaperones	Ubiquitin-conjugating enzyme	SUMO-conjugating enzyme SCE1 OS=Arabidopsis thaliana OX=3702 GN=SCE1 PE=1 SV=1	UBC core domain-containing protein OS=Acer yangbiense OX=1000413 GN=EZV62_013960 PE=3 SV=1	O	Posttranslational modification, protein turnover, chaperones	SUMO-conjugating enzyme UBC9-B-like [Rhodamnia argentea]
BMK_Unigene_146724	--	--	Biological Process: protein polyubiquitination (GO:0000209);; Molecular Function: ATP binding (GO:0005524);; Cellular Component: nucleus (GO:0005634);; Biological Process: ubiquitin-dependent protein catabolic process (GO:0006511);; Molecular Function: ubiquitin conjugating enzyme activity (GO:0061631);;	K10583|1.4e-82|zju:107423515|K10583 ubiquitin-conjugating enzyme E2 S [EC:2.3.2.23] | (RefSeq) ubiquitin-conjugating enzyme E2 22	[O]	Posttranslational modification, protein turnover, chaperones	Ubiquitin-conjugating enzyme	Ubiquitin-conjugating enzyme E2 22 OS=Arabidopsis thaliana OX=3702 GN=UBC22 PE=1 SV=1	UBC core domain-containing protein OS=Vitis vinifera OX=29760 GN=VIT_08s0040g00460 PE=3 SV=1	O	Posttranslational modification, protein turnover, chaperones	ubiquitin-conjugating enzyme E2 22 [Ziziphus jujuba]
BMK_Unigene_195935	--	--	Molecular Function: molecular_function (GO:0003674);; Molecular Function: structural constituent of ribosome (GO:0003735);; Molecular Function: structural molecule activity (GO:0005198);; Cellular Component: cellular_component (GO:0005575);; Cellular Component: intracellular (GO:0005622);; Cellular Component: obsolete cell (GO:0005623);; Cellular Component: nucleus (GO:0005634);; Cellular Compone…	K02951|1.5e-18|vcn:VOLCADRAFT_107705|K02951 small subunit ribosomal protein S12e | (RefSeq) rps12; component of cytosolic 80S ribosome and 40S small subunit	[J]	Translation, ribosomal structure and biogenesis	Ribosomal protein L7Ae/L30e/S12e/Gadd45 family	40S ribosomal protein S12 OS=Cyanophora paradoxa OX=2762 GN=RPS12 PE=2 SV=1	40S ribosomal protein S12 (Fragment) OS=Noccaea caerulescens OX=107243 GN=LE_TR14391_c0_g1_i1_g.45621 PE=3 SV=1	J	Translation, ribosomal structure and biogenesis	40S ribosomal protein S12 [Sphaeroforma arctica JP610]
BMK_Unigene_072253	--	--	--	K11273|5.7e-54|pxb:103944873|K11273 chromosome transmission fidelity protein 1 [EC:3.6.4.13] | (RefSeq) LOW QUALITY PROTEIN: probable ATP-dependent DNA helicase DDX11	--	--	--	--	Uncharacterized protein OS=Trema orientale OX=63057 GN=TorRG33x02_158270 PE=4 SV=1	--	--	uncharacterized protein LOC107404667 [Ziziphus jujuba]
BMK_Unigene_156163	--	--	Molecular Function: DNA binding (GO:0003677);; Cellular Component: nucleus (GO:0005634);; Biological Process: DNA replication (GO:0006260);; Biological Process: DNA repair (GO:0006281);; Biological Process: DNA recombination (GO:0006310);; Molecular Function: metal ion binding (GO:0046872);;	K07466|1.3e-288|lja:Lj6g3v1201400.1|K07466 replication factor A1 | (RefSeq) Lj6g3v1201400.1; -	[L]	Replication, recombination and repair	Replication factor-A C terminal domain;; Replication factor-A protein 1, N-terminal domain;; Replication protein A OB domain;; OB-fold nucleic acid binding domain;; Protein of unknown function (DUF1005)	Replication protein A 70 kDa DNA-binding subunit A OS=Arabidopsis thaliana OX=3702 GN=RPA1A PE=1 SV=1	Replication protein A subunit OS=Trema orientale OX=63057 GN=TorRG33x02_321390 PE=3 SV=1	L	Replication, recombination and repair	replication protein A 70 kDa DNA-binding subunit A [Ziziphus jujuba]
BMK_Unigene_120892	--	--	Molecular Function: transmembrane receptor protein tyrosine kinase activity (GO:0004714);; Molecular Function: ATP binding (GO:0005524);; Biological Process: protein phosphorylation (GO:0006468);; Biological Process: transmembrane receptor protein tyrosine kinase signaling pathway (GO:0007169);; Cellular Component: membrane (GO:0016020);;	--	[T]	Signal transduction mechanisms	Receptor L domain;; Furin-like cysteine rich region	--	--	--	--	epidermal growth factor receptor-like, partial [Rhodamnia argentea]
BMK_Unigene_068806	--	--	Molecular Function: DNA binding (GO:0003677);;	K15178|0.0e+00|zju:107411729|K15178 RNA polymerase-associated protein RTF1 | (RefSeq) protein RTF1 homolog	[K]	Transcription	Plus-3 domain	Protein RTF1 homolog OS=Arabidopsis thaliana OX=3702 GN=VIP5 PE=1 SV=1	RNA polymerase-associated protein Rtf OS=Parasponia andersonii OX=3476 GN=PanWU01x14_087530 PE=4 SV=1	K	Transcription	protein RTF1 homolog [Ziziphus jujuba]
BMK_Unigene_124527	[G]	Carbohydrate transport and metabolism	Molecular Function: structural constituent of ribosome (GO:0003735);; Molecular Function: hydrolase activity, hydrolyzing O-glycosyl compounds (GO:0004553);; Cellular Component: extracellular region (GO:0005576);; Cellular Component: ribosome (GO:0005840);; Biological Process: carbohydrate metabolic process (GO:0005975);; Biological Process: translation (GO:0006412);; Biological Process: cellulos…	K19668|4.9e-30|ccp:CHC_T00010029001|K19668 cellulose 1,4-beta-cellobiosidase [EC:3.2.1.91] | (RefSeq) exoglucanase 3 1,4-beta-cellobiohydrolase3 family GH6, Exoglucanase 3 (Pyrenophora tritici-repentis (strain Pt-1C-BFP)), Predicted CDS Pa_4_2420 (Podospora anserina)	--	--	Glycosyl hydrolases family 6;; Fungal cellulose binding domain	--	Endoglucanase OS=Symbiodinium microadriaticum OX=2951 GN=eglS PE=3 SV=1	--	--	exoglucanase 2 precursor [Pochonia chlamydosporia 170]
BMK_Unigene_000462	[T]	Signal transduction mechanisms	Molecular Function: protein serine/threonine kinase activity (GO:0004674);; Molecular Function: ATP binding (GO:0005524);; Cellular Component: integral component of membrane (GO:0016021);;	K13418|1.2e-64|ppp:112280930|K13418 somatic embryogenesis receptor kinase 1 [EC:2.7.10.1 2.7.11.1] | (RefSeq) LRR receptor kinase BAK1-like	[T]	Signal transduction mechanisms	Protein kinase domain;; Protein tyrosine and serine/threonine kinase;; SPARK	Probable receptor-like protein kinase At1g11050 OS=Arabidopsis thaliana OX=3702 GN=At1g11050 PE=2 SV=1	Serine/threonine protein kinase OS=Trema orientale OX=63057 GN=TorRG33x02_175650 PE=4 SV=1	T	Signal transduction mechanisms	probable receptor-like protein kinase At1g11050 [Ziziphus jujuba]
BMK_Unigene_269284	--	--	Molecular Function: structural constituent of ribosome (GO:0003735);; Cellular Component: ribosome (GO:0005840);; Biological Process: translational elongation (GO:0006414);;	K02943|1.8e-16|vcn:VOLCADRAFT_120883|K02943 large subunit ribosomal protein LP2 | (RefSeq) hypothetical protein	[J]	Translation, ribosomal structure and biogenesis	60s Acidic ribosomal protein	60S acidic ribosomal protein P2B OS=Zea mays OX=4577 GN=RPP2B PE=1 SV=1	Ribosomal protein putative OS=Albugo laibachii Nc14 OX=890382 GN=AlNc14C36G3182 PE=3 SV=1	J	Translation, ribosomal structure and biogenesis	ribosomal protein 60S [Basidiobolus meristosporus CBS 931.73]
BMK_Unigene_073563	[C]	Energy production and conversion	Biological Process: ATP synthesis coupled proton transport (GO:0015986);; Cellular Component: proton-transporting ATP synthase complex, catalytic core F(1) (GO:0045261);; Molecular Function: proton-transporting ATP synthase activity, rotational mechanism (GO:0046933);;	K02134|3.2e-105|zju:107431463|K02134 F-type H+-transporting ATPase subunit delta | (RefSeq) ATP synthase subunit delta', mitochondrial	[C]	Energy production and conversion	ATP synthase, Delta/Epsilon chain, beta-sandwich domain	ATP synthase subunit delta', mitochondrial OS=Ipomoea batatas OX=4120 PE=1 SV=1	ATPase, F1 complex, delta/epsilon subunit OS=Trema orientale OX=63057 GN=TorRG33x02_045600 PE=3 SV=1	C	Energy production and conversion	ATP synthase subunit delta', mitochondrial [Ziziphus jujuba]
BMK_Unigene_144176	--	--	Molecular Function: adenosylmethionine decarboxylase activity (GO:0004014);; Biological Process: S-adenosylmethioninamine biosynthetic process (GO:0006557);; Biological Process: spermine biosynthetic process (GO:0006597);; Biological Process: spermidine biosynthetic process (GO:0008295);;	K01611|1.1e-146|jre:108989524|K01611 S-adenosylmethionine decarboxylase [EC:4.1.1.50] | (RefSeq) S-adenosylmethionine decarboxylase proenzyme-like	[T]	Signal transduction mechanisms	Adenosylmethionine decarboxylase;; S-adenosyl-l-methionine decarboxylase leader peptide	S-adenosylmethionine decarboxylase proenzyme OS=Oryza sativa subsp. japonica OX=39947 GN=SAMDC PE=2 SV=1	S-adenosylmethionine decarboxylase proenzyme OS=Juglans regia OX=51240 GN=LOC108989524 PE=3 SV=1	T	Signal transduction mechanisms	hypothetical protein FNV43_RR03331 [Rhamnella rubrinervis]
BMK_Unigene_000665	--	--	Biological Process: DNA methylation (GO:0006306);; Molecular Function: methyltransferase activity (GO:0008168);;	--	--	--	--	Probable inactive DNA (cytosine-5)-methyltransferase DRM3 OS=Arabidopsis thaliana OX=3702 GN=DRM3 PE=1 SV=1	DNA (Cytosine-5)-methyltransferase DRM1 isoform X5 OS=Juglans regia OX=51240 GN=LOC109001172 PE=4 SV=1	S	Function unknown	probable inactive DNA (cytosine-5)-methyltransferase DRM3 isoform X1 [Ziziphus jujuba]
BMK_Unigene_145989	[J]	Translation, ribosomal structure and biogenesis	Molecular Function: RNA binding (GO:0003723);; Cellular Component: cytosolic large ribosomal subunit (GO:0022625);; Biological Process: ribosome biogenesis (GO:0042254);;	K02936|1.4e-135|zju:107422016|K02936 large subunit ribosomal protein L7Ae | (RefSeq) 60S ribosomal protein L7a-1-like	[J]	Translation, ribosomal structure and biogenesis	Ribosomal protein L7Ae/L30e/S12e/Gadd45 family	60S ribosomal protein L7a-1 OS=Oryza sativa subsp. japonica OX=39947 GN=RPL7A-1 PE=2 SV=1	60S ribosomal protein L7a (Fragment) OS=Davidia involucrata OX=16924 GN=Din_031705 PE=3 SV=1	J	Translation, ribosomal structure and biogenesis	60S ribosomal protein L7a-1-like [Ziziphus jujuba]
BMK_Unigene_071639	--	--	--	--	--	--	--	--	Uncharacterized protein OS=Prunus persica OX=3760 GN=PRUPE_1G076200 PE=4 SV=1	--	--	uncharacterized protein LOC107429094 isoform X2 [Ziziphus jujuba]
BMK_Unigene_156777	--	--	Molecular Function: nucleic acid binding (GO:0003676);; Molecular Function: zinc ion binding (GO:0008270);; Biological Process: DNA integration (GO:0015074);;	K03686|4.3e-68|ghi:107900121|K03686 molecular chaperone DnaJ | (RefSeq) uncharacterized protein LOC107900121	[R]	General function prediction only	Reverse transcriptase (RNA-dependent DNA polymerase);; Ring finger domain	RNA-directed DNA polymerase homolog OS=Oenothera berteroana OX=3950 PE=4 SV=1	Endonuclease OS=Fagus sylvatica OX=28930 GN=FSB_LOCUS12373 PE=4 SV=1	L	Replication, recombination and repair	LOW QUALITY PROTEIN: uncharacterized protein LOC112493144, partial [Ziziphus jujuba]
BMK_Unigene_176718	--	--	Molecular Function: RNA binding (GO:0003723);; Molecular Function: structural constituent of ribosome (GO:0003735);; Biological Process: translation (GO:0006412);; Cellular Component: large ribosomal subunit (GO:0015934);;	K02865|2.4e-24|gsl:Gasu_29500|K02865 large subunit ribosomal protein L10Ae | (RefSeq) 60S ribosomal protein L1Ae	[J]	Translation, ribosomal structure and biogenesis	Ribosomal protein L1p/L10e family	60S ribosomal protein L10a OS=Chlamydomonas reinhardtii OX=3055 GN=RPL10A PE=2 SV=1	Ribosomal protein OS=Galdieria sulphuraria OX=130081 GN=Gasu_29500 PE=3 SV=1	J	Translation, ribosomal structure and biogenesis	ribosomal protein L1 [Rhizoclosmatium globosum]
BMK_Unigene_139931	--	--	Biological Process: reproduction (GO:0000003);; Cellular Component: ubiquitin ligase complex (GO:0000151);; Biological Process: response to acid chemical (GO:0001101);; Biological Process: activation of innate immune response (GO:0002218);; Biological Process: immune effector process (GO:0002252);; Biological Process: activation of immune response (GO:0002253);; Biological Process: immune system …	K14508|5.1e-135|zju:107433767|K14508 regulatory protein NPR1 | (RefSeq) regulatory protein NPR5-like isoform X1	[R]	General function prediction only	Ankyrin repeats (3 copies);; Ankyrin repeats (many copies);; Ankyrin repeat;; Ankyrin repeat;; Ankyrin repeats (many copies)	BTB/POZ domain and ankyrin repeat-containing protein NOOT2 OS=Medicago truncatula OX=3880 GN=NOOT2 PE=2 SV=1	Regulatory protein NPR5 OS=Morella rubra OX=262757 GN=CJ030_MR2G001817 PE=4 SV=1	S	Function unknown	regulatory protein NPR5-like isoform X2 [Ziziphus jujuba]
BMK_Unigene_267108	[T]	Signal transduction mechanisms	Biological Process: reproduction (GO:0000003);; Biological Process: response to acid chemical (GO:0001101);; Biological Process: developmental process involved in reproduction (GO:0003006);; Molecular Function: molecular_function (GO:0003674);; Molecular Function: catalytic activity (GO:0003824);; Molecular Function: protein kinase activity (GO:0004672);; Molecular Function: protein serine/threon…	K07198|5.3e-14|dct:110093905|K07198 5'-AMP-activated protein kinase, catalytic alpha subunit [EC:2.7.11.11] | (RefSeq) SNF1-related protein kinase catalytic subunit alpha KIN10 isoform X1	[T]	Signal transduction mechanisms	Protein kinase domain;; Protein tyrosine and serine/threonine kinase	SNF1-related protein kinase catalytic subunit alpha KIN11 OS=Arabidopsis thaliana OX=3702 GN=KIN11 PE=1 SV=1	Non-specific serine/threonine protein kinase OS=Selaginella moellendorffii OX=88036 GN=SELMODRAFT_234034 PE=3 SV=1	T	Signal transduction mechanisms	CAMK/CAMKL/PASK protein kinase [Spizellomyces punctatus DAOM BR117]
BMK_Unigene_142309	--	--	--	--	[TR]	--	BTG family	--	--	--	--	hypothetical protein SARC_05395 [Sphaeroforma arctica JP610]
BMK_Unigene_148698	--	--	Molecular Function: ATP binding (GO:0005524);; Cellular Component: integral component of membrane (GO:0016021);; Molecular Function: ATPase activity (GO:0016887);; Molecular Function: ATPase-coupled transmembrane transporter activity (GO:0042626);;	--	[U]	Intracellular trafficking, secretion, and vesicular transport	--	ABC transporter B family member 27 OS=Arabidopsis thaliana OX=3702 GN=ABCB27 PE=1 SV=1	ABC transporter B family member 27-like OS=Juglans regia OX=51240 GN=LOC108988197 PE=4 SV=1	Q	Secondary metabolites biosynthesis, transport and catabolism	ABC transporter B family member 27-like [Ziziphus jujuba]
BMK_Unigene_147844	--	--	Cellular Component: integral component of membrane (GO:0016021);;	--	--	--	4F5 protein related disordered region	--	4F5 domain-containing protein OS=Trema orientale OX=63057 GN=TorRG33x02_136290 PE=4 SV=1	--	--	uncharacterized protein At2g23090-like [Ziziphus jujuba]
BMK_Unigene_147145	[R]	General function prediction only	Cellular Component: integral component of membrane (GO:0016021);;	K03549|7.5e-30|csat:104769726|K03549 KUP system potassium uptake protein | (RefSeq) potassium transporter 8-like isoform X1	--	--	--	--	Uncharacterized protein (Fragment) OS=Davidia involucrata OX=16924 GN=Din_005439 PE=4 SV=1	S	Function unknown	protein SUPPRESSOR OF QUENCHING 1, chloroplastic-like isoform X2 [Ziziphus jujuba]
BMK_Unigene_078566	[O]	Posttranslational modification, protein turnover, chaperones	Molecular Function: molecular_function (GO:0003674);; Cellular Component: cellular_component (GO:0005575);; Cellular Component: intracellular (GO:0005622);; Cellular Component: obsolete cell (GO:0005623);; Cellular Component: cytoplasm (GO:0005737);; Biological Process: sulfur compound metabolic process (GO:0006790);; Molecular Function: enzyme activator activity (GO:0008047);; Biological Process…	K03517|4.9e-58|jre:109005552|K03517 quinolinate synthase [EC:2.5.1.72] | (RefSeq) quinolinate synthase, chloroplastic	--	--	Fe-S metabolism associated domain	SufE-like protein 2, chloroplastic OS=Arabidopsis thaliana OX=3702 GN=SUFE2 PE=2 SV=1	Fe-S metabolism associated domain OS=Parasponia andersonii OX=3476 GN=PanWU01x14_125890 PE=4 SV=1	S	Function unknown	sufE-like protein 2, chloroplastic [Ziziphus jujuba]
BMK_Unigene_139692	--	--	Biological Process: phosphorelay signal transduction system (GO:0000160);; Molecular Function: molecular_function (GO:0003674);; Molecular Function: catalytic activity (GO:0003824);; Molecular Function: protein kinase activity (GO:0004672);; Molecular Function: binding (GO:0005488);; Molecular Function: iron ion binding (GO:0005506);; Molecular Function: protein binding (GO:0005515);; Molecular F…	K14490|6.1e-86|zju:107423312|K14490 histidine-containing phosphotransfer peotein | (RefSeq) histidine-containing phosphotransfer protein 1 isoform X1	[T]	Signal transduction mechanisms	--	Histidine-containing phosphotransfer protein 1 OS=Arabidopsis thaliana OX=3702 GN=AHP1 PE=1 SV=1	Procollagen-proline 4-dioxygenase OS=Malus domestica OX=3750 GN=DVH24_025585 PE=3 SV=1	T	Signal transduction mechanisms	histidine-containing phosphotransfer protein 1 isoform X1 [Ziziphus jujuba]
BMK_Unigene_079948	[H]	Coenzyme transport and metabolism	Molecular Function: ATP binding (GO:0005524);; Biological Process: protein sumoylation (GO:0016925);; Molecular Function: SUMO activating enzyme activity (GO:0019948);; Cellular Component: SUMO activating enzyme complex (GO:0031510);; Molecular Function: metal ion binding (GO:0046872);;	K10685|1.5e-288|zju:107426735|K10685 ubiquitin-like 1-activating enzyme E1 B [EC:6.2.1.45] | (RefSeq) SUMO-activating enzyme subunit 2 isoform X1	[O]	Posttranslational modification, protein turnover, chaperones	ThiF family;; Ubiquitin-activating enzyme active site;; Ubiquitin/SUMO-activating enzyme ubiquitin-like domain	SUMO-activating enzyme subunit 2 OS=Arabidopsis thaliana OX=3702 GN=SAE2 PE=1 SV=1	SUMO-activating enzyme subunit OS=Theobroma cacao OX=3641 GN=TCM_006829 PE=3 SV=1	O	Posttranslational modification, protein turnover, chaperones	SUMO-activating enzyme subunit 2 isoform X1 [Ziziphus jujuba]
BMK_Unigene_153512	[J]	Translation, ribosomal structure and biogenesis	Molecular Function: molecular_function (GO:0003674);; Molecular Function: nucleic acid binding (GO:0003676);; Molecular Function: RNA binding (GO:0003723);; Molecular Function: translation initiation factor activity (GO:0003743);; Molecular Function: binding (GO:0005488);; Cellular Component: cellular_component (GO:0005575);; Cellular Component: intracellular (GO:0005622);; Cellular Component: ob…	K02520|1.5e-305|zju:107427377|K02520 translation initiation factor IF-3 | (RefSeq) translation initiation factor IF3-1, mitochondrial	--	--	Translation initiation factor IF-3, N-terminal domain	Translation initiation factor IF3-1, mitochondrial OS=Arabidopsis thaliana OX=3702 GN=IF3-1 PE=2 SV=1	Uncharacterized protein OS=Davidia involucrata OX=16924 GN=Din_034804 PE=3 SV=1	J	Translation, ribosomal structure and biogenesis	translation initiation factor IF3-1, mitochondrial [Ziziphus jujuba]
BMK_Unigene_124248	[C]	Energy production and conversion	Molecular Function: NAD(P)H dehydrogenase (quinone) activity (GO:0003955);; Molecular Function: FMN binding (GO:0010181);;	K03809|1.2e-47|dcr:108204475|K03809 NAD(P)H dehydrogenase (quinone) [EC:1.6.5.2] | (RefSeq) probable NAD(P)H dehydrogenase (quinone) FQR1-like 1	[R]	General function prediction only	NADPH-dependent FMN reductase	Quinone-oxidoreductase QR2 OS=Triphysaria versicolor OX=64093 PE=1 SV=1	Flavoprotein YCP4 OS=Phytophthora nicotianae OX=4790 GN=AM587_10006140 PE=3 SV=1	S	Function unknown	benzoquinone reductase [Tulasnella calospora MUT 4182]
BMK_Unigene_080302	--	--	Cellular Component: integral component of membrane (GO:0016021);; Molecular Function: transmembrane transporter activity (GO:0022857);;	K14638|3.0e-244|gmx:100777732|K14638 solute carrier family 15 (peptide/histidine transporter), member 3/4 | (RefSeq) protein NRT1/ PTR FAMILY 7.1	[E]	Amino acid transport and metabolism	POT family	Protein NRT1/ PTR FAMILY 7.1 OS=Arabidopsis thaliana OX=3702 GN=NPF7.1 PE=2 SV=1	Uncharacterized protein OS=Prunus persica OX=3760 GN=PRUPE_6G014900 PE=3 SV=1	E	Amino acid transport and metabolism	protein NRT1/ PTR FAMILY 7.1-like [Ziziphus jujuba]
BMK_Unigene_173201	--	--	--	--	--	--	--	--	--	--	--	hypothetical protein AMAG_18391 [Allomyces macrogynus ATCC 38327]
BMK_Unigene_154603	[O]	Posttranslational modification, protein turnover, chaperones	Molecular Function: serine-type endopeptidase activity (GO:0004252);;	K15333|1.3e-21|nsy:104224633|K15333 tRNA guanosine-2'-O-methyltransferase [EC:2.1.1.34] | (RefSeq) uncharacterized protein LOC104224633	--	--	Subtilase family	Cucumisin OS=Cucumis melo OX=3656 PE=1 SV=1	Uncharacterized protein OS=Salix brachista OX=2182728 GN=DKX38_016284 PE=3 SV=1	O	Posttranslational modification, protein turnover, chaperones	cucumisin-like isoform X1 [Ziziphus jujuba]
BMK_Unigene_132903	--	--	Molecular Function: calcium ion binding (GO:0005509);; Biological Process: calcium-mediated signaling (GO:0019722);;	K02183|4.5e-18|sita:101769427|K02183 calmodulin | (RefSeq) neo-calmodulin	[Z]	Cytoskeleton	EF-hand domain pair;; EF-hand domain;; EF hand	Caltractin OS=Scherffelia dubia OX=3190 PE=1 SV=1	Calmodulin OS=Porphyra umbilicalis OX=2786 GN=BU14_0144s0010 PE=3 SV=1	--	--	myosin regulatory light chain sqh-like [Rhodamnia argentea]
BMK_Unigene_139041	[J]	Translation, ribosomal structure and biogenesis	Molecular Function: structural constituent of ribosome (GO:0003735);; Biological Process: translation (GO:0006412);; Cellular Component: small ribosomal subunit (GO:0015935);;	K02973|5.3e-49|cmax:111483580|K02973 small subunit ribosomal protein S23e | (RefSeq) 40S ribosomal protein S23-like	[J]	Translation, ribosomal structure and biogenesis	Ribosomal protein S12/S23	40S ribosomal protein S23 OS=Fragaria ananassa OX=3747 GN=RPS23 PE=2 SV=1	Uncharacterized protein OS=Coffea canephora OX=49390 GN=GSCOC_T00023642001 PE=3 SV=1	J	Translation, ribosomal structure and biogenesis	unnamed protein product [Coffea canephora]
BMK_Unigene_279670	--	--	--	--	--	--	--	--	--	--	--	hypothetical protein M407DRAFT_25854 [Tulasnella calospora MUT 4182]
BMK_Unigene_141591	--	--	Molecular Function: ATP binding (GO:0005524);; Cellular Component: integral component of membrane (GO:0016021);; Molecular Function: ATPase activity (GO:0016887);;	--	[Q]	Secondary metabolites biosynthesis, transport and catabolism	ABC-transporter N-terminal	Pleiotropic drug resistance protein 1 OS=Petunia axillaris OX=33119 GN=PDR1 PE=2 SV=1	ABA transporter OS=Camptotheca acuminata OX=16922 GN=ABAT PE=2 SV=1	Q	Secondary metabolites biosynthesis, transport and catabolism	LOW QUALITY PROTEIN: pleiotropic drug resistance protein 1 [Ziziphus jujuba]
BMK_Unigene_156201	--	--	Molecular Function: ADP binding (GO:0043531);;	K12818|3.3e-129|mtr:MTR_0267s0070|K12818 ATP-dependent RNA helicase DHX8/PRP22 [EC:3.6.4.13] | (RefSeq) NB-ARC domain disease resistance protein, putative	[T]	Signal transduction mechanisms	NB-ARC domain;; Rx N-terminal domain;; Leucine rich repeat;; Leucine Rich repeats (2 copies)	Putative disease resistance RPP13-like protein 1 OS=Arabidopsis thaliana OX=3702 GN=RPPL1 PE=3 SV=1	Uncharacterized protein OS=Fagus sylvatica OX=28930 GN=FSB_LOCUS50206 PE=4 SV=1	T	Signal transduction mechanisms	putative disease resistance RPP13-like protein 1 [Ziziphus jujuba]
BMK_Unigene_152455	--	--	Biological Process: morphogenesis of a branching structure (GO:0001763);; Molecular Function: molecular_function (GO:0003674);; Molecular Function: catalytic activity (GO:0003824);; Molecular Function: binding (GO:0005488);; Molecular Function: iron ion binding (GO:0005506);; Cellular Component: cellular_component (GO:0005575);; Cellular Component: intracellular (GO:0005622);; Cellular Component:…	K17911|2.5e-09|zju:107425854|K17911 beta-carotene isomerase [EC:5.2.1.14] | (RefSeq) beta-carotene isomerase D27, chloroplastic	--	--	--	Beta-carotene isomerase D27, chloroplastic OS=Arabidopsis thaliana OX=3702 GN=D27 PE=1 SV=1	DUF4033 domain-containing protein OS=Ricinus communis OX=3988 GN=RCOM_0991210 PE=4 SV=1	S	Function unknown	beta-carotene isomerase D27, chloroplastic [Ziziphus jujuba]
BMK_Unigene_196065	[T]	Signal transduction mechanisms	--	K19044|1.9e-06|sita:101769393|K19044 E3 ubiquitin-protein ligase XBAT32/33 [EC:2.3.2.27] | (RefSeq) probable E3 ubiquitin-protein ligase XBOS32	[T]	Signal transduction mechanisms	Ankyrin repeats (3 copies);; Ankyrin repeats (many copies);; Ankyrin repeat;; Ankyrin repeats (many copies);; Ankyrin repeat	Probable E3 ubiquitin-protein ligase XBOS32 OS=Oryza sativa subsp. japonica OX=39947 GN=XBOS32 PE=2 SV=2	Uncharacterized protein OS=Triticum urartu OX=4572 PE=4 SV=1	O	Posttranslational modification, protein turnover, chaperones	uncharacterized protein LOC115754905 [Rhodamnia argentea]
BMK_Unigene_081265	[P]	Inorganic ion transport and metabolism	Molecular Function: ATP binding (GO:0005524);; Cellular Component: integral component of membrane (GO:0016021);; Molecular Function: ATPase-coupled cation transmembrane transporter activity (GO:0019829);; Biological Process: metal ion transport (GO:0030001);; Molecular Function: metal ion binding (GO:0046872);;	K17686|5.3e-300|zju:107421513|K17686 P-type Cu+ transporter [EC:7.2.2.8] | (RefSeq) copper-transporting ATPase PAA1, chloroplastic	[P]	Inorganic ion transport and metabolism	E1-E2 ATPase;; haloacid dehalogenase-like hydrolase;; haloacid dehalogenase-like hydrolase;; Heavy-metal-associated domain	Copper-transporting ATPase PAA1, chloroplastic OS=Arabidopsis thaliana OX=3702 GN=PAA1 PE=1 SV=1	HMA6 protein OS=Morus alba OX=3498 GN=HMA6 PE=2 SV=1	P	Inorganic ion transport and metabolism	copper-transporting ATPase PAA1, chloroplastic [Ziziphus jujuba]
BMK_Unigene_185249	--	--	Cellular Component: integral component of membrane (GO:0016021);;	--	[DKT]	--	LEM3 (ligand-effect modulator 3) family / CDC50 family	ALA-interacting subunit 1 OS=Arabidopsis thaliana OX=3702 GN=ALIS1 PE=1 SV=1	ALA-interacting subunit OS=Arabidopsis thaliana OX=3702 GN=AXX17_At3g12790 PE=3 SV=1	--	--	unnamed protein product [Arabidopsis thaliana]
BMK_Unigene_153646	[K]	Transcription	Molecular Function: DNA binding (GO:0003677);; Molecular Function: DNA-directed 5'-3' RNA polymerase activity (GO:0003899);; Biological Process: transcription, DNA-templated (GO:0006351);;	K10908|8.3e-243|zju:107429131|K10908 DNA-directed RNA polymerase, mitochondrial [EC:2.7.7.6] | (RefSeq) DNA-directed RNA polymerase 1B, mitochondrial	[KL]	--	DNA-dependent RNA polymerase;; DNA-dependent RNA polymerase	DNA-directed RNA polymerase 1B, mitochondrial OS=Nicotiana tabacum OX=4097 GN=RPOT1-TOM PE=2 SV=2	DNA-directed RNA polymerase OS=Juglans regia OX=51240 GN=LOC108989412 PE=3 SV=1	K	Transcription	DNA-directed RNA polymerase 1B, mitochondrial [Ziziphus jujuba]
BMK_Unigene_139987	[T]	Signal transduction mechanisms	Molecular Function: protein serine/threonine phosphatase activity (GO:0004722);; Cellular Component: nucleus (GO:0005634);; Cellular Component: cytoplasm (GO:0005737);; Molecular Function: metal ion binding (GO:0046872);;	K06269|9.8e-110|zju:107422885|K06269 serine/threonine-protein phosphatase PP1 catalytic subunit [EC:3.1.3.16] | (RefSeq) serine/threonine-protein phosphatase PP1 isozyme 2-like	[TR]	--	Calcineurin-like phosphoesterase;; Serine-threonine protein phosphatase N-terminal domain	Serine/threonine-protein phosphatase PP1 isozyme 1 OS=Acetabularia peniculus OX=35862 PE=3 SV=1	Serine/threonine-protein phosphatase OS=Nicotiana tabacum OX=4097 GN=LOC107813197 PE=3 SV=1	T	Signal transduction mechanisms	serine/threonine-protein phosphatase PP1 isozyme 2-like [Ziziphus jujuba]
BMK_Unigene_069866	--	--	Cellular Component: cellular_component (GO:0005575);; Cellular Component: obsolete cell (GO:0005623);; Cellular Component: plasma membrane (GO:0005886);; Cellular Component: membrane (GO:0016020);; Cellular Component: obsolete cell part (GO:0044464);; Cellular Component: cell periphery (GO:0071944);;	--	--	--	--	Uncharacterized protein At2g33490 OS=Arabidopsis thaliana OX=3702 GN=At2g33490 PE=4 SV=2	Uncharacterized protein OS=Brassica oleracea var. oleracea OX=109376 PE=4 SV=1	S	Function unknown	uncharacterized protein At2g33490 [Ziziphus jujuba]
BMK_Unigene_151663	--	--	Molecular Function: UDP-glycosyltransferase activity (GO:0008194);;	K18823|9.9e-115|pvu:PHAVU_006G208300g|K18823 soyasaponin III rhamnosyltransferase [EC:2.4.1.273] | (RefSeq) hypothetical protein	[GC]	--	UDP-glucoronosyl and UDP-glucosyl transferase;; Glycosyltransferase family 28 C-terminal domain	UDP-glycosyltransferase 91A1 OS=Arabidopsis thaliana OX=3702 GN=UGT91A1 PE=2 SV=1	Uncharacterized protein OS=Nyssa sinensis OX=561372 GN=F0562_005330 PE=4 SV=1	--	--	UDP-glycosyltransferase 91A1-like [Ziziphus jujuba]
BMK_Unigene_154284	--	--	Cellular Component: exocyst (GO:0000145);; Biological Process: exocytosis (GO:0006887);; Biological Process: protein transport (GO:0015031);;	K07195|0.0e+00|zju:107432771|K07195 exocyst complex component 7 | (RefSeq) exocyst complex component EXO70H1-like	[U]	Intracellular trafficking, secretion, and vesicular transport	Exo70 exocyst complex subunit	Exocyst complex component EXO70H1 OS=Arabidopsis thaliana OX=3702 GN=EXO70H1 PE=1 SV=1	Exocyst subunit Exo70 family protein OS=Trema orientale OX=63057 GN=TorRG33x02_014240 PE=3 SV=1	U	Intracellular trafficking, secretion, and vesicular transport	exocyst complex component EXO70H1-like [Ziziphus jujuba]
BMK_Unigene_126137	--	--	Molecular Function: structural constituent of cuticle (GO:0042302);;	--	[W]	Extracellular structures	Nematode cuticle collagen N-terminal domain	--	--	--	--	--
BMK_Unigene_080196	--	--	--	--	[MW]	--	Fasciclin domain	Fasciclin-like arabinogalactan protein 17 OS=Arabidopsis thaliana OX=3702 GN=FLA17 PE=2 SV=1	Uncharacterized protein OS=Cucumis sativus OX=3659 GN=Csa_1G629740 PE=3 SV=1	--	--	fasciclin-like arabinogalactan protein 15 [Ziziphus jujuba]
BMK_Unigene_078250	--	--	--	--	--	--	PDDEXK-like family of unknown function	--	Uncharacterized protein OS=Fagus sylvatica OX=28930 GN=FSB_LOCUS54643 PE=4 SV=1	S	Function unknown	uncharacterized protein LOC107413434 [Ziziphus jujuba]
BMK_Unigene_073968	[O]	Posttranslational modification, protein turnover, chaperones	Molecular Function: metalloendopeptidase activity (GO:0004222);; Molecular Function: ATP binding (GO:0005524);; Cellular Component: integral component of membrane (GO:0016021);;	--	--	--	--	--	Transmembrane protein OS=Trema orientale OX=63057 GN=TorRG33x02_185540 PE=4 SV=1	--	--	Transmembrane protein [Trema orientale]
BMK_Unigene_154012	--	--	Molecular Function: metal ion binding (GO:0046872);;	--	[TZ]	--	LIM domain;; Protein DA1;; Protein DA1	Protein DA1-related 1 OS=Arabidopsis thaliana OX=3702 GN=DAR1 PE=1 SV=3	protein DA1-related 1 isoform X1 OS=Juglans regia OX=51240 GN=LOC108997551 PE=4 SV=1	--	--	protein DA1-related 1-like [Ziziphus jujuba]
BMK_Unigene_143587	[O]	Posttranslational modification, protein turnover, chaperones	Molecular Function: metalloendopeptidase activity (GO:0004222);; Molecular Function: ATP binding (GO:0005524);; Molecular Function: zinc ion binding (GO:0008270);; Cellular Component: integral component of membrane (GO:0016021);;	K08956|6.1e-124|zju:107411022|K08956 AFG3 family protein [EC:3.4.24.-] | (RefSeq) ATP-dependent zinc metalloprotease FTSH 10, mitochondrial-like	[O]	Posttranslational modification, protein turnover, chaperones	Peptidase family M41;; AAA+ lid domain	ATP-dependent zinc metalloprotease FTSH 10, mitochondrial OS=Arabidopsis thaliana OX=3702 GN=FTSH10 PE=1 SV=1	ATP-dependent zinc metalloprotease FTSH 10 OS=Morus notabilis OX=981085 GN=L484_025274 PE=3 SV=1	O	Posttranslational modification, protein turnover, chaperones	ATP-dependent zinc metalloprotease FTSH 10, mitochondrial-like [Ziziphus jujuba]
BMK_Unigene_086197	--	--	Molecular Function: structural constituent of ribosome (GO:0003735);; Cellular Component: ribosome (GO:0005840);; Biological Process: translation (GO:0006412);;	K02934|5.2e-23|vvi:100252724|K02934 large subunit ribosomal protein L6e | (RefSeq) 60S ribosomal protein L6-3	[J]	Translation, ribosomal structure and biogenesis	Ribosomal protein L6e	60S ribosomal protein L6 OS=Mesembryanthemum crystallinum OX=3544 GN=RPL6 PE=2 SV=1	60S ribosomal protein L6 OS=Albugo laibachii Nc14 OX=890382 GN=AlNc14C409G11438 PE=3 SV=1	J	Translation, ribosomal structure and biogenesis	60S ribosomal protein L6 putative [Albugo laibachii Nc14]
BMK_Unigene_156550	[V]	Defense mechanisms	Molecular Function: ATP binding (GO:0005524);; Cellular Component: integral component of membrane (GO:0016021);; Molecular Function: ATPase activity (GO:0016887);; Molecular Function: ATPase-coupled transmembrane transporter activity (GO:0042626);;	K05658|1.1e-60|fve:101296580|K05658 ATP-binding cassette, subfamily B (MDR/TAP), member 1 [EC:7.6.2.2] | (RefSeq) ABC transporter B family member 2-like	[U]	Intracellular trafficking, secretion, and vesicular transport	ABC transporter transmembrane region;; ABC transporter	ABC transporter B family member 26, chloroplastic OS=Arabidopsis thaliana OX=3702 GN=ABCB26 PE=1 SV=1	ATP-binding cassette containing protein OS=Trema orientale OX=63057 GN=TorRG33x02_200170 PE=4 SV=1	Q	Secondary metabolites biosynthesis, transport and catabolism	ABC transporter B family member 26, chloroplastic-like isoform X2 [Ziziphus jujuba]
BMK_Unigene_119434	--	--	Molecular Function: serine-type endopeptidase activity (GO:0004252);; Biological Process: proteolysis (GO:0006508);;	--	[E]	Amino acid transport and metabolism	Trypsin	--	Predicted protein OS=Hordeum vulgare subsp. vulgare OX=112509 PE=2 SV=1	--	--	predicted protein [Hordeum vulgare subsp. vulgare]
BMK_Unigene_321928	--	--	--	K03872|2.2e-06|mis:MICPUN_60172|K03872 elongin-C | (RefSeq) predicted protein	--	--	--	--	--	--	--	hypothetical protein M407DRAFT_17064 [Tulasnella calospora MUT 4182]
BMK_Unigene_087335	[E]	Amino acid transport and metabolism	Biological Process: system process (GO:0003008);; Biological Process: renal system process (GO:0003014);; Biological Process: glomerular filtration (GO:0003094);; Molecular Function: molecular_function (GO:0003674);; Molecular Function: catalytic activity (GO:0003824);; Molecular Function: aminopeptidase activity (GO:0004177);; Molecular Function: binding (GO:0005488);; Molecular Function: protei…	K01262|8.6e-18|lang:109346225|K01262 Xaa-Pro aminopeptidase [EC:3.4.11.9] | (RefSeq) probable Xaa-Pro aminopeptidase 3	[E]	Amino acid transport and metabolism	Metallopeptidase family M24	Intermediate cleaving peptidase 55, mitochondrial OS=Arabidopsis thaliana OX=3702 GN=ICP55 PE=1 SV=1	Peptidase M24 OS=Macleaya cordata OX=56857 GN=BVC80_1543g177 PE=4 SV=1	E	Amino acid transport and metabolism	hypothetical protein G195_001296 [Phytophthora kernoviae 00238/432]
BMK_Unigene_117918	--	--	--	--	--	--	Granulin	--	--	--	--	--
BMK_Unigene_150247	--	--	Molecular Function: DNA binding (GO:0003677);; Molecular Function: DNA-binding transcription factor activity (GO:0003700);; Cellular Component: nucleus (GO:0005634);;	K09285|1.9e-236|zju:107431731|K09285 AP2-like factor, ANT lineage | (RefSeq) AP2-like ethylene-responsive transcription factor At2g41710	--	--	AP2 domain	AP2-like ethylene-responsive transcription factor At2g41710 OS=Arabidopsis thaliana OX=3702 GN=At2g41710 PE=1 SV=2	AP2/ERF transcription factor OS=Parasponia andersonii OX=3476 GN=PanERF12 PE=4 SV=1	K	Transcription	AP2-like ethylene-responsive transcription factor At2g41710 [Ziziphus jujuba]
BMK_Unigene_179281	--	--	--	--	--	--	Double-stranded RNA binding motif	--	--	--	--	--
BMK_Unigene_080372	--	--	Molecular Function: ATP transmembrane transporter activity (GO:0005347);; Cellular Component: integral component of membrane (GO:0016021);;	K15119|7.9e-195|zju:107424160|K15119 solute carrier family 25, member 39/40 | (RefSeq) mitochondrial carrier protein MTM1-like	[C]	Energy production and conversion	Mitochondrial carrier protein	Mitochondrial carrier protein MTM1 OS=Arabidopsis thaliana OX=3702 GN=MTM1 PE=2 SV=1	Mitochondrial carrier protein OS=Trema orientale OX=63057 GN=TorRG33x02_067200 PE=3 SV=1	C	Energy production and conversion	mitochondrial carrier protein MTM1-like [Ziziphus jujuba]
BMK_Unigene_153851	--	--	--	K20160|1.8e-06|olu:OSTLU_27205|K20160 DENN domain-containing protein 1 | (RefSeq) predicted protein	--	--	DENN (AEX-3) domain	--	DENN domain containing protein OS=Trema orientale OX=63057 GN=TorRG33x02_225700 PE=4 SV=1	T	Signal transduction mechanisms	uncharacterized protein LOC107424124 [Ziziphus jujuba]
BMK_Unigene_003085	[C]	Energy production and conversion	Molecular Function: glycerol-3-phosphate dehydrogenase [NAD+] activity (GO:0004367);; Biological Process: carbohydrate metabolic process (GO:0005975);; Cellular Component: glycerol-3-phosphate dehydrogenase complex (GO:0009331);; Biological Process: glycerol-3-phosphate catabolic process (GO:0046168);; Molecular Function: NAD binding (GO:0051287);;	K00006|2.2e-245|zju:107417808|K00006 glycerol-3-phosphate dehydrogenase (NAD+) [EC:1.1.1.8] | (RefSeq) probable glycerol-3-phosphate dehydrogenase [NAD(+)] 1, cytosolic	[C]	Energy production and conversion	NAD-dependent glycerol-3-phosphate dehydrogenase C-terminus;; NAD-dependent glycerol-3-phosphate dehydrogenase N-terminus	Glycerol-3-phosphate dehydrogenase [NAD(+)] GPDHC1, cytosolic OS=Arabidopsis thaliana OX=3702 GN=GPDHC1 PE=2 SV=1	Glycerol-3-phosphate dehydrogenase [NAD(+)] OS=Davidia involucrata OX=16924 GN=Din_018242 PE=3 SV=1	C	Energy production and conversion	probable glycerol-3-phosphate dehydrogenase [NAD(+)] 1, cytosolic [Ziziphus jujuba]
BMK_Unigene_253172	--	--	Biological Process: lipid metabolic process (GO:0006629);; Cellular Component: integral component of membrane (GO:0016021);; Molecular Function: oxidoreductase activity, acting on the CH-CH group of donors (GO:0016627);;	K10258|1.8e-24|mpp:MICPUCDRAFT_49391|K10258 very-long-chain enoyl-CoA reductase [EC:1.3.1.93] | (RefSeq) hypothetical protein	[I]	Lipid transport and metabolism	--	--	Uncharacterized protein OS=Helicosporidium sp. ATCC 50920 OX=1291522 GN=H632_c257p1 PE=3 SV=1	I	Lipid transport and metabolism	trans-2,3-enoyl-CoA reductase [Capsaspora owczarzaki ATCC 30864]
BMK_Unigene_077455	--	--	Biological Process: generation of catalytic spliceosome for second transesterification step (GO:0000350);;	K12870|2.8e-155|zju:107422440|K12870 pre-mRNA-splicing factor ISY1 | (RefSeq) pre-mRNA-splicing factor ISY1 homolog	[A]	RNA processing and modification	Isy1-like splicing family	--	Pre-mRNA-splicing factor ISY1-like protein OS=Cucumis melo var. makuwa OX=1194695 GN=E5676_scaffold459G001580 PE=3 SV=1	A	RNA processing and modification	pre-mRNA-splicing factor ISY1 homolog [Ziziphus jujuba]
BMK_Unigene_176974	[R]	General function prediction only	--	--	--	--	--	--	--	--	--	--
BMK_Unigene_172918	--	--	Molecular Function: oxidoreductase activity (GO:0016491);; Molecular Function: protein dimerization activity (GO:0046983);; Molecular Function: flavin adenine dinucleotide binding (GO:0050660);;	--	[T]	Signal transduction mechanisms	Apoptosis-inducing factor, mitochondrion-associated, C-term	--	Programmed cell death 8 (Apoptosis-inducing factor) OS=Galdieria sulphuraria OX=130081 GN=Gasu_32820 PE=3 SV=1	--	--	programmed cell death protein 8 [Capsaspora owczarzaki ATCC 30864]
BMK_Unigene_073707	[D]	Cell cycle control, cell division, chromosome partitioning	Molecular Function: 5'-nucleotidase activity (GO:0008253);; Molecular Function: metal ion binding (GO:0046872);;	K01081|3.5e-33|gsl:Gasu_60230|K01081 5'-nucleotidase [EC:3.1.3.5] | (RefSeq) 5' nucleotidase family protein	[F]	Nucleotide transport and metabolism	5' nucleotidase family;; 5' nucleotidase family	--	Uncharacterized protein OS=Prunus persica OX=3760 GN=PRUPE_1G104500 PE=3 SV=1	F	Nucleotide transport and metabolism	5'-nucleotidase domain-containing protein 4-like [Ziziphus jujuba]
BMK_Unigene_083428	--	--	Cellular Component: small-subunit processome (GO:0032040);;	K14766|0.0e+00|zju:107429082|K14766 nucleolar protein 14 | (RefSeq) nucleolar protein 14	[J]	Translation, ribosomal structure and biogenesis	Nop14-like family	--	Nucleolar protein OS=Trema orientale OX=63057 GN=TorRG33x02_070020 PE=3 SV=1	J	Translation, ribosomal structure and biogenesis	nucleolar protein 14 [Ziziphus jujuba]
BMK_Unigene_148589	--	--	--	--	--	--	--	Protein NARROW LEAF 1 OS=Oryza sativa subsp. japonica OX=39947 GN=NAL1 PE=1 SV=1	Uncharacterized protein OS=Davidia involucrata OX=16924 GN=Din_004463 PE=4 SV=1	S	Function unknown	uncharacterized protein LOC107420669 isoform X1 [Ziziphus jujuba]
BMK_Unigene_081958	--	--	Biological Process: reproduction (GO:0000003);; Cellular Component: ubiquitin ligase complex (GO:0000151);; Biological Process: mitotic cell cycle (GO:0000278);; Biological Process: nuclear division (GO:0000280);; Cellular Component: male germ cell nucleus (GO:0001673);; Biological Process: developmental process involved in reproduction (GO:0003006);; Molecular Function: protein binding (GO:00055…	--	--	--	F-box-like;; F-box domain	F-box/LRR-repeat protein 17 OS=Arabidopsis thaliana OX=3702 GN=FBL17 PE=1 SV=1	F-box domain containing protein OS=Parasponia andersonii OX=3476 GN=PanWU01x14_316190 PE=4 SV=1	S	Function unknown	F-box/LRR-repeat protein 17 [Ziziphus jujuba]
BMK_Unigene_306074	--	--	--	--	--	--	Unc-13 homolog	--	Uncharacterized protein OS=Cucumis sativus OX=3659 GN=Csa_3G134740 PE=4 SV=1	S	Function unknown	protein unc-13 homolog [Ziziphus jujuba]
BMK_Unigene_110109	--	--	Molecular Function: molecular_function (GO:0003674);; Molecular Function: catalytic activity (GO:0003824);; Molecular Function: protein kinase activity (GO:0004672);; Molecular Function: protein serine/threonine kinase activity (GO:0004674);; Molecular Function: calmodulin-dependent protein kinase activity (GO:0004683);; Molecular Function: binding (GO:0005488);; Molecular Function: protein bindi…	K13412|2.2e-09|lsv:111900150|K13412 calcium-dependent protein kinase [EC:2.7.11.1] | (RefSeq) calcium and calcium/calmodulin-dependent serine/threonine-protein kinase DMI-3-like	[T]	Signal transduction mechanisms	--	Calcium and calcium/calmodulin-dependent serine/threonine-protein kinase OS=Lilium longiflorum OX=4690 GN=CCAMK PE=1 SV=1	Protein kinase domain-containing protein (Fragment) OS=Aureococcus anophagefferens OX=44056 GN=AURANDRAFT_59997 PE=3 SV=1	T	Signal transduction mechanisms	calcium/calmodulin-dependent protein kinase type II delta chain-like, partial [Rhodamnia argentea]
BMK_Unigene_083785	[E]	Amino acid transport and metabolism	Biological Process: cellular amino acid metabolic process (GO:0006520);; Molecular Function: oxidoreductase activity (GO:0016491);;	K00262|2.0e-187|zju:107403966|K00262 glutamate dehydrogenase (NADP+) [EC:1.4.1.4] | (RefSeq) NADP-specific glutamate dehydrogenase isoform X1	[E]	Amino acid transport and metabolism	Glu/Leu/Phe/Val dehydrogenase, dimerisation domain;; Glutamate/Leucine/Phenylalanine/Valine dehydrogenase;; Glu/Leu/Phe/Val dehydrogenase, dimerisation domain	NADP-specific glutamate dehydrogenase (Fragment) OS=Chlorella sorokiniana OX=3076 PE=2 SV=1	Glutamate/phenylalanine/leucine/valine dehydrogenase OS=Trema orientale OX=63057 GN=TorRG33x02_080400 PE=3 SV=1	E	Amino acid transport and metabolism	NADP-specific glutamate dehydrogenase isoform X1 [Ziziphus jujuba]
BMK_Unigene_150538	--	--	Molecular Function: AT DNA binding (GO:0003680);; Cellular Component: nucleus (GO:0005634);;	--	--	--	Plants and Prokaryotes Conserved (PCC) domain	AT-hook motif nuclear-localized protein 1 OS=Arabidopsis thaliana OX=3702 GN=AHL1 PE=1 SV=1	AT-hook motif nuclear-localized protein OS=Vitis vinifera OX=29760 GN=AHL1_10 PE=4 SV=1	K	Transcription	AT-hook motif nuclear-localized protein 1-like [Ziziphus jujuba]
BMK_Unigene_044832	--	--	--	--	[C]	Energy production and conversion	NADH:ubiquinone oxidoreductase, NDUFS5-15kDa;; Cytochrome c oxidase biogenesis protein Cmc1 like	--	--	--	--	--
BMK_Unigene_065330	--	--	Molecular Function: structural constituent of ribosome (GO:0003735);; Cellular Component: ribosome (GO:0005840);; Biological Process: translation (GO:0006412);;	K02917|6.7e-25|obr:102713908|K02917 large subunit ribosomal protein L35Ae | (RefSeq) 60S ribosomal protein L35a-2	[J]	Translation, ribosomal structure and biogenesis	Ribosomal protein L35Ae	60S ribosomal protein L35a-3 OS=Arabidopsis thaliana OX=3702 GN=RPL35AC PE=3 SV=1	60S ribosomal protein L35a OS=Anthurium amnicola OX=1678845 GN=RPL35A_1 PE=3 SV=1	J	Translation, ribosomal structure and biogenesis	predicted protein [Hordeum vulgare subsp. vulgare]
BMK_Unigene_131060	--	--	Biological Process: defense response (GO:0006952);;	--	--	--	Pathogenesis-related protein Bet v 1 family;; Polyketide cyclase / dehydrase and lipid transport	MLP-like protein 28 OS=Arabidopsis thaliana OX=3702 GN=MLP28 PE=1 SV=1	MLP28 OS=Arabidopsis thaliana OX=3702 GN=AXX17_At1g65010 PE=4 SV=1	S	Function unknown	MLP-like protein 28 [Arabidopsis thaliana]
BMK_Unigene_137741	--	--	Molecular Function: motor activity (GO:0003774);; Cellular Component: cytoplasm (GO:0005737);; Cellular Component: microtubule (GO:0005874);; Biological Process: microtubule-based process (GO:0007017);; Cellular Component: dynein complex (GO:0030286);;	K10418|7.1e-40|zju:107433141|K10418 dynein light chain LC8-type | (RefSeq) dynein light chain 1, cytoplasmic isoform X1	[Z]	Cytoskeleton	Dynein light chain type 1	Dynein 8 kDa light chain, flagellar outer arm OS=Chlamydomonas reinhardtii OX=3055 PE=1 SV=1	Dynein light chain OS=Morus notabilis OX=981085 GN=L484_007210 PE=3 SV=1	Z	Cytoskeleton	dynein 8 kDa light chain, flagellar outer arm isoform X2 [Ziziphus jujuba]
BMK_Unigene_241318	--	--	Cellular Component: mitochondrial outer membrane translocase complex (GO:0005742);; Biological Process: protein targeting (GO:0006605);; Cellular Component: integral component of membrane (GO:0016021);;	--	[U]	Intracellular trafficking, secretion, and vesicular transport	MAS20 protein import receptor	--	Mitochondrial import receptor subunit TOM20 OS=Anthurium amnicola OX=1678845 GN=Tomm20 PE=3 SV=1	--	--	hypothetical protein CAOG_01504 [Capsaspora owczarzaki ATCC 30864]
BMK_Unigene_139095	--	--	Molecular Function: GTPase activity (GO:0003924);; Molecular Function: GTP binding (GO:0005525);;	K17065|4.5e-43|zju:107426765|K17065 dynamin 1-like protein [EC:3.6.5.5] | (RefSeq) dynamin-related protein 3A-like isoform X1	[UR]	--	--	Dynamin-related protein 3A OS=Arabidopsis thaliana OX=3702 GN=DRP3A PE=1 SV=2	Uncharacterized protein OS=Malus domestica OX=3750 GN=DVH24_037940 PE=4 SV=1	U	Intracellular trafficking, secretion, and vesicular transport	dynamin-related protein 3A-like isoform X1 [Ziziphus jujuba]
BMK_Unigene_003818	[J]	Translation, ribosomal structure and biogenesis	Biological Process: ribosomal small subunit assembly (GO:0000028);; Molecular Function: structural constituent of ribosome (GO:0003735);; Biological Process: translation (GO:0006412);; Cellular Component: cytosolic small ribosomal subunit (GO:0022627);;	K02998|1.8e-163|zju:107435247|K02998 small subunit ribosomal protein SAe | (RefSeq) 40S ribosomal protein SA-like isoform X1	[J]	Translation, ribosomal structure and biogenesis	Ribosomal protein S2	40S ribosomal protein SA OS=Vitis vinifera OX=29760 GN=GSVIVT00034021001 PE=3 SV=1	40S ribosomal protein SA OS=Trema orientale OX=63057 GN=TorRG33x02_313870 PE=3 SV=1	J	Translation, ribosomal structure and biogenesis	40S ribosomal protein SA-like isoform X1 [Ziziphus jujuba]
BMK_Unigene_155201	[T]	Signal transduction mechanisms	Molecular Function: protein kinase activity (GO:0004672);; Molecular Function: ATP binding (GO:0005524);;	K08857|0.0e+00|zju:107410239|K08857 NIMA (never in mitosis gene a)-related kinase 1/4/5 [EC:2.7.11.1] | (RefSeq) serine/threonine-protein kinase Nek5	[R]	General function prediction only	Protein kinase domain;; Protein tyrosine and serine/threonine kinase	Serine/threonine-protein kinase Nek5 OS=Arabidopsis thaliana OX=3702 GN=NEK5 PE=1 SV=1	Serine/threonine-protein kinase Nek5 OS=Morus notabilis OX=981085 GN=L484_001758 PE=4 SV=1	T	Signal transduction mechanisms	serine/threonine-protein kinase Nek5 [Ziziphus jujuba]
BMK_Unigene_078670	[IQ]	--	Cellular Component: integral component of membrane (GO:0016021);;	K03955|1.4e-49|pavi:110768621|K03955 NADH dehydrogenase (ubiquinone) 1 alpha/beta subcomplex 1, acyl-carrier protein | (RefSeq) acyl carrier protein 3, mitochondrial isoform X1	[CIQ]	--	Pollen protein Ole e 1 like;; Phosphopantetheine attachment site	Acyl carrier protein 3, mitochondrial OS=Arabidopsis thaliana OX=3702 GN=MTACP2 PE=1 SV=1	Uncharacterized protein OS=Trema orientale OX=63057 GN=TorRG33x02_139480 PE=4 SV=1	S	Function unknown	uncharacterized protein LOC107416006 [Ziziphus jujuba]
BMK_Unigene_142160	--	--	Cellular Component: nucleus (GO:0005634);;	K17602|1.7e-10|zju:107415854|K17602 YLP motif-containing protein 1 | (RefSeq) uncharacterized protein LOC107415854 isoform X1	--	--	--	--	Uncharacterized protein OS=Morus notabilis OX=981085 GN=L484_007633 PE=4 SV=1	V	Defense mechanisms	uncharacterized protein LOC107415854 isoform X1 [Ziziphus jujuba]
BMK_Unigene_153642	--	--	Cellular Component: integral component of membrane (GO:0016021);; Molecular Function: transmembrane transporter activity (GO:0022857);;	K17500|7.6e-47|nto:104085001|K17500 integrin-linked kinase-associated serine/threonine phosphatase 2C [EC:3.1.3.16] | (RefSeq) WAT1-related protein At3g18200 isoform X1	--	--	EamA-like transporter family	WAT1-related protein At5g40240 OS=Arabidopsis thaliana OX=3702 GN=At5g40240 PE=2 SV=1	WAT1-related protein OS=Prunus dulcis OX=3755 GN=ALMOND_2B032109 PE=3 SV=1	S	Function unknown	WAT1-related protein At3g28050-like isoform X1 [Ziziphus jujuba]
BMK_Unigene_151675	--	--	Molecular Function: molecular_function (GO:0003674);; Molecular Function: DNA-binding transcription factor activity (GO:0003700);; Molecular Function: binding (GO:0005488);; Molecular Function: protein binding (GO:0005515);; Molecular Function: phospholipid binding (GO:0005543);; Cellular Component: cellular_component (GO:0005575);; Cellular Component: intracellular (GO:0005622);; Cellular Compon…	K19600|1.2e-33|mis:MICPUN_63330|K19600 tubby-related protein 1 | (RefSeq) tubby-like protein	[R]	General function prediction only	Tub family;; Tub family;; F-box domain;; F-box-like	Tubby-like F-box protein 8 OS=Oryza sativa subsp. japonica OX=39947 GN=TULP8 PE=2 SV=1	Tubby-like F-box protein OS=Fagus sylvatica OX=28930 GN=FSB_LOCUS1535 PE=3 SV=1	S	Function unknown	tubby-like F-box protein 8 [Ziziphus jujuba]
BMK_Unigene_138433	--	--	--	--	--	--	Protein of unknown function (DUF3421)	--	--	--	--	--
BMK_Unigene_140354	[O]	Posttranslational modification, protein turnover, chaperones	Biological Process: response to reactive oxygen species (GO:0000302);; Molecular Function: molecular_function (GO:0003674);; Molecular Function: binding (GO:0005488);; Molecular Function: protein binding (GO:0005515);; Cellular Component: cellular_component (GO:0005575);; Cellular Component: intracellular (GO:0005622);; Cellular Component: obsolete cell (GO:0005623);; Cellular Component: cytoplas…	K13993|9.5e-109|zju:107404752|K13993 HSP20 family protein | (RefSeq) small heat shock protein, chloroplastic-like	[O]	Posttranslational modification, protein turnover, chaperones	Hsp20/alpha crystallin family;; HSP20-like domain found in ArsA	Small heat shock protein, chloroplastic (Fragment) OS=Glycine max OX=3847 GN=HSP22 PE=2 SV=1	Small heat shock protein OS=Pyrus ussuriensis x Pyrus communis OX=2448454 GN=D8674_032318 PE=3 SV=1	O	Posttranslational modification, protein turnover, chaperones	small heat shock protein, chloroplastic-like [Ziziphus jujuba]
BMK_Unigene_007481	--	--	--	--	--	--	Glucose-repressible protein Grg1	--	--	--	--	--
BMK_Unigene_072807	[M]	Cell wall/membrane/envelope biogenesis	Molecular Function: protein kinase activity (GO:0004672);; Molecular Function: ATP binding (GO:0005524);; Cellular Component: integral component of membrane (GO:0016021);;	K13416|1.1e-28|bna:106368734|K13416 brassinosteroid insensitive 1-associated receptor kinase 1 [EC:2.7.10.1 2.7.11.1] | (RefSeq) BRASSINOSTEROID INSENSITIVE 1-associated receptor kinase 1	--	--	Protein kinase domain;; Protein tyrosine and serine/threonine kinase	Probable inactive receptor kinase At5g58300 OS=Arabidopsis thaliana OX=3702 GN=At5g58300 PE=1 SV=1	probable inactive receptor kinase At5g58300 OS=Juglans regia OX=51240 GN=LOC108996914 PE=4 SV=1	T	Signal transduction mechanisms	probable inactive receptor kinase At5g58300 [Ziziphus jujuba]
BMK_Unigene_177299	[C]	Energy production and conversion	Molecular Function: transferase activity, transferring acyl groups, acyl groups converted into alkyl on transfer (GO:0046912);;	K01648|3.2e-43|aly:9318551|K01648 ATP citrate (pro-S)-lyase [EC:2.3.3.8] | (RefSeq) ATP-citrate synthase beta chain protein 1	[C]	Energy production and conversion	--	ATP-citrate synthase beta chain protein 1 OS=Arabidopsis thaliana OX=3702 GN=ACLB-1 PE=2 SV=1	ATP citrate synthase OS=Arabidopsis thaliana OX=3702 GN=AXX17_At3g06470 PE=4 SV=1	C	Energy production and conversion	unnamed protein product [Arabis nemorensis]
BMK_Unigene_185823	--	--	--	--	[R]	General function prediction only	--	--	--	--	--	--
BMK_Unigene_153736	[G]	Carbohydrate transport and metabolism	Molecular Function: hydrolase activity, hydrolyzing O-glycosyl compounds (GO:0004553);; Biological Process: carbohydrate metabolic process (GO:0005975);;	K15920|0.0e+00|zju:107426828|K15920 xylan 1,4-beta-xylosidase [EC:3.2.1.37] | (RefSeq) probable beta-D-xylosidase 5	--	--	Glycosyl hydrolase family 3 C-terminal domain;; Glycosyl hydrolase family 3 N terminal domain;; Fibronectin type III-like domain	Probable beta-D-xylosidase 5 OS=Arabidopsis thaliana OX=3702 GN=BXL5 PE=2 SV=2	Glycoside hydrolase OS=Trema orientale OX=63057 GN=TorRG33x02_136080 PE=3 SV=1	G	Carbohydrate transport and metabolism	probable beta-D-xylosidase 5 [Ziziphus jujuba]
BMK_Unigene_073811	[I]	Lipid transport and metabolism	Biological Process: lipid metabolic process (GO:0006629);; Molecular Function: O-acyltransferase activity (GO:0008374);;	K22389|6.2e-243|zju:107412494|K22389 phospholipase A1 [EC:3.1.1.32] | (RefSeq) phospholipase A(1) LCAT3	[I]	Lipid transport and metabolism	Lecithin:cholesterol acyltransferase	Phospholipase A(1) LCAT3 OS=Arabidopsis thaliana OX=3702 GN=LCAT3 PE=1 SV=1	Lecithin:cholesterol/phospholipid:diacylglycerol acyltransferase OS=Parasponia andersonii OX=3476 GN=PanWU01x14_162260 PE=4 SV=1	I	Lipid transport and metabolism	phospholipase A(1) LCAT3 [Ziziphus jujuba]
BMK_Unigene_072345	--	--	Cellular Component: integral component of membrane (GO:0016021);;	K15356|2.2e-108|jre:108996286|K15356 GDP-mannose transporter | (RefSeq) GDP-mannose transporter GONST1 isoform X1	[GOU]	--	--	GDP-mannose transporter GONST1 OS=Arabidopsis thaliana OX=3702 GN=GONST1 PE=1 SV=2	GDP-mannose transporter GONST1 isoform X2 OS=Juglans regia OX=51240 GN=LOC108996286 PE=4 SV=1	--	--	hypothetical protein FNV43_RR18880 [Rhamnella rubrinervis]
BMK_Unigene_292907	--	--	--	--	--	--	Syndecan domain	--	--	--	--	--
BMK_Unigene_083163	--	--	--	--	--	--	--	--	GBF-interacting protein OS=Parasponia andersonii OX=3476 GN=PanWU01x14_287090 PE=4 SV=1	S	Function unknown	uncharacterized protein LOC107404589 isoform X1 [Ziziphus jujuba]
BMK_Unigene_072338	--	--	Molecular Function: nucleic acid binding (GO:0003676);;	K14525|4.9e-55|ats:109751438|K14525 ribonucleases P/MRP protein subunit RPP25 [EC:3.1.26.5] | (RefSeq) LOC109751438; ribonuclease P protein subunit p25-like	[S]	Function unknown	Alba	--	cold and drought-regulated protein CORA-like OS=Juglans regia OX=51240 GN=LOC108984239 PE=4 SV=1	S	Function unknown	hypothetical protein FNV43_RR10663 [Rhamnella rubrinervis]
BMK_Unigene_148173	[QV]	--	Molecular Function: iron ion binding (GO:0005506);; Molecular Function: flavonoid 3'-monooxygenase activity (GO:0016711);; Molecular Function: heme binding (GO:0020037);;	K20562|3.0e-161|thj:104815260|K20562 biphenyl-4-hydroxylase | (RefSeq) cytochrome P450 CYP736A12-like	[Q]	Secondary metabolites biosynthesis, transport and catabolism	Cytochrome P450	Cytochrome P450 CYP736A12 OS=Panax ginseng OX=4054 PE=2 SV=1	Putative flavonoid 3'-monooxygenase OS=Rosa chinensis OX=74649 GN=RchiOBHm_Chr6g0280191 PE=3 SV=1	Q	Secondary metabolites biosynthesis, transport and catabolism	cytochrome P450 CYP736A12-like [Ziziphus jujuba]
BMK_Unigene_069768	--	--	Molecular Function: DNA binding (GO:0003677);; Molecular Function: DNA-binding transcription factor activity (GO:0003700);; Cellular Component: nucleus (GO:0005634);;	K09286|4.8e-82|zju:107424539|K09286 EREBP-like factor | (RefSeq) ethylene-responsive transcription factor RAP2-10	--	--	AP2 domain	Ethylene-responsive transcription factor ERF008 OS=Arabidopsis thaliana OX=3702 GN=ERF008 PE=2 SV=1	Dehydration responsive element binding transcription factor OS=Morus notabilis OX=981085 GN=DREB5A PE=2 SV=1	K	Transcription	ethylene-responsive transcription factor RAP2-10 [Ziziphus jujuba]
BMK_Unigene_147436	[I]	Lipid transport and metabolism	Biological Process: fatty acid biosynthetic process (GO:0006633);; Cellular Component: chloroplast (GO:0009507);; Molecular Function: thiolester hydrolase activity (GO:0016790);;	K10782|7.9e-224|zju:107426715|K10782 fatty acyl-ACP thioesterase A [EC:3.1.2.14] | (RefSeq) oleoyl-acyl carrier protein thioesterase 1, chloroplastic	--	--	Acyl-ACP thioesterase	Oleoyl-acyl carrier protein thioesterase 1, chloroplastic OS=Arabidopsis thaliana OX=3702 GN=FATA PE=1 SV=1	Acyl-[acyl-carrier-protein] hydrolase OS=Morus notabilis OX=981085 GN=L484_007018 PE=3 SV=1	I	Lipid transport and metabolism	oleoyl-acyl carrier protein thioesterase 1, chloroplastic [Ziziphus jujuba]
BMK_Unigene_103741	--	--	Cellular Component: extracellular space (GO:0005615);;	--	--	--	Transthyretin-like family	--	--	--	--	--
BMK_Unigene_084242	--	--	Molecular Function: metal ion binding (GO:0046872);;	--	[BK]	--	DDT domain;; PHD-finger;; WSTF, HB1, Itc1p, MBD9 motif 1	DDT domain-containing protein PTM OS=Arabidopsis thaliana OX=3702 GN=PTM PE=1 SV=1	Autoimmune regulator OS=Trema orientale OX=63057 GN=TorRG33x02_255840 PE=4 SV=1	--	--	DDT domain-containing protein PTM [Ziziphus jujuba]
BMK_Unigene_082698	--	--	Cellular Component: integral component of membrane (GO:0016021);;	K02184|4.0e-181|ini:109182789|K02184 formin 2 | (RefSeq) formin-like protein 1	[TZ]	--	Formin Homology 2 Domain	Formin-like protein 1 OS=Oryza sativa subsp. japonica OX=39947 GN=FH1 PE=2 SV=1	Formin-like protein OS=Trema orientale OX=63057 GN=TorRG33x02_208550 PE=3 SV=1	--	--	formin-like protein 2 [Ziziphus jujuba]
BMK_Unigene_080721	--	--	Cellular Component: integral component of membrane (GO:0016021);;	K20798|3.3e-17|csat:104728186|K20798 small RNA 2'-O-methyltransferase [EC:2.1.1.-] | (RefSeq) small RNA 2'-O-methyltransferase-like	--	--	--	Uncharacterized membrane protein At1g75140 OS=Arabidopsis thaliana OX=3702 GN=At1g75140 PE=1 SV=3	Guanine nucleotide-binding protein, beta subunit OS=Parasponia andersonii OX=3476 GN=PanWU01x14_297120 PE=4 SV=1	S	Function unknown	uncharacterized membrane protein At1g75140 [Ziziphus jujuba]
BMK_Unigene_081837	--	--	Cellular Component: nuclear chromosome (GO:0000228);; Biological Process: telomere maintenance (GO:0000723);; Cellular Component: chromosome, telomeric region (GO:0000781);; Cellular Component: telomere cap complex (GO:0000782);; Cellular Component: nuclear telomere cap complex (GO:0000783);; Cellular Component: nuclear chromosome, telomeric region (GO:0000784);; Molecular Function: molecular_fun…	K22128|4.4e-32|smo:SELMODRAFT_404967|K22128 piezo-type mechanosensitive ion channel component 1/2 | (RefSeq) hypothetical protein	[R]	General function prediction only	--	Protection of telomeres protein 1a OS=Arabidopsis thaliana OX=3702 GN=POT1A PE=1 SV=1	Protection of telomeres protein OS=Trema orientale OX=63057 GN=TorRG33x02_236630 PE=3 SV=1	S	Function unknown	protection of telomeres protein 1b-like isoform X1 [Ziziphus jujuba]
BMK_Unigene_147807	--	--	Cellular Component: Golgi membrane (GO:0000139);; Biological Process: protein glycosylation (GO:0006486);; Cellular Component: integral component of membrane (GO:0016021);; Molecular Function: transferase activity, transferring glycosyl groups (GO:0016757);;	K20854|1.1e-93|zju:107414531|K20854 hydroxyproline O-galactosyltransferase HPGT [EC:2.4.1.-] | (RefSeq) hydroxyproline O-galactosyltransferase HPGT1	[G]	Carbohydrate transport and metabolism	Domain of unknown function (DUF4094);; Galactosyltransferase;; Galactosyltransferase	Hydroxyproline O-galactosyltransferase HPGT1 OS=Arabidopsis thaliana OX=3702 GN=HPTG1 PE=1 SV=1	Hexosyltransferase OS=Parasponia andersonii OX=3476 GN=PanWU01x14_225090 PE=3 SV=1	G	Carbohydrate transport and metabolism	hydroxyproline O-galactosyltransferase HPGT1 [Ziziphus jujuba]
BMK_Unigene_307047	--	--	--	--	--	--	SOCS box	--	--	--	--	--
BMK_Unigene_078397	--	--	Cellular Component: extracellular region (GO:0005576);; Molecular Function: N-acylsphingosine amidohydrolase activity (GO:0017040);; Biological Process: long-chain fatty acid biosynthetic process (GO:0042759);; Biological Process: sphingosine biosynthetic process (GO:0046512);; Biological Process: ceramide catabolic process (GO:0046514);; Molecular Function: ceramidase activity (GO:0102121);;	K12349|1.3e-28|rcu:8273449|K12349 neutral ceramidase [EC:3.5.1.23] | (RefSeq) neutral ceramidase 2	[T]	Signal transduction mechanisms	--	Neutral ceramidase 1 OS=Arabidopsis thaliana OX=3702 GN=NCER1 PE=2 SV=1	Neutral ceramidase OS=Ricinus communis OX=3988 GN=RCOM_0085480 PE=3 SV=1	T	Signal transduction mechanisms	neutral ceramidase 1 [Cannabis sativa]
BMK_Unigene_082263	[P]	Inorganic ion transport and metabolism	Molecular Function: potassium ion transmembrane transporter activity (GO:0015079);; Cellular Component: integral component of membrane (GO:0016021);;	K03549|0.0e+00|zju:107428627|K03549 KUP system potassium uptake protein | (RefSeq) putative potassium transporter 12	--	--	K+ potassium transporter	Putative potassium transporter 12 OS=Arabidopsis thaliana OX=3702 GN=POT12 PE=1 SV=2	Potassium transporter OS=Trema orientale OX=63057 GN=TorPOT12 PE=3 SV=1	P	Inorganic ion transport and metabolism	putative potassium transporter 12 [Ziziphus jujuba]
BMK_Unigene_167968	[O]	Posttranslational modification, protein turnover, chaperones	Biological Process: glycerol ether metabolic process (GO:0006662);; Molecular Function: protein disulfide oxidoreductase activity (GO:0015035);; Biological Process: cell redox homeostasis (GO:0045454);;	K03671|6.4e-23|olu:OSTLU_26095|K03671 thioredoxin 1 | (RefSeq) predicted protein	[O]	Posttranslational modification, protein turnover, chaperones	Thioredoxin;; Thioredoxin-like domain	Monothiol glutaredoxin-S17 OS=Arabidopsis thaliana OX=3702 GN=GRXS17 PE=1 SV=1	Thioredoxin OS=Ostreococcus lucimarinus (strain CCE9901) OX=436017 GN=OSTLU_26095 PE=3 SV=1	O	Posttranslational modification, protein turnover, chaperones	predicted protein [Ostreococcus lucimarinus CCE9901]
BMK_Unigene_317957	[C]	Energy production and conversion	Biological Process: ATP synthesis coupled proton transport (GO:0015986);; Cellular Component: proton-transporting ATP synthase complex, catalytic core F(1) (GO:0045261);; Molecular Function: proton-transporting ATP synthase activity, rotational mechanism (GO:0046933);;	K02136|1.8e-49|qsu:112009698|K02136 F-type H+-transporting ATPase subunit gamma | (RefSeq) ATP synthase subunit gamma, mitochondrial-like	[C]	Energy production and conversion	ATP synthase	ATP synthase subunit gamma, mitochondrial OS=Arabidopsis thaliana OX=3702 GN=ATPC PE=1 SV=1	ATP synthase subunit gamma (Fragment) OS=Anthurium amnicola OX=1678845 GN=ATPsyn-gamma_1 PE=3 SV=1	C	Energy production and conversion	ATP synthase subunit gamma, mitochondrial-like [Rhodamnia argentea]
BMK_Unigene_076466	--	--	Cellular Component: integral component of membrane (GO:0016021);;	K13946|1.2e-253|nnu:104596961|K13946 auxin influx carrier (AUX1 LAX family) | (RefSeq) auxin transporter-like protein 2	[E]	Amino acid transport and metabolism	Transmembrane amino acid transporter protein	Auxin transporter-like protein 2 OS=Medicago truncatula OX=3880 GN=LAX2 PE=2 SV=1	auxin transporter-like protein 2 OS=Nelumbo nucifera OX=4432 GN=LOC104596961 PE=4 SV=1	E	Amino acid transport and metabolism	hypothetical protein FNV43_RR24599 [Rhamnella rubrinervis]
BMK_Unigene_131447	--	--	Cellular Component: extracellular region (GO:0005576);; Biological Process: xylem development (GO:0010089);; Molecular Function: receptor serine/threonine kinase binding (GO:0033612);; Cellular Component: apoplast (GO:0048046);;	--	--	--	--	--	Uncharacterized protein OS=Prunus persica OX=3760 GN=PRUPE_1G005400 PE=4 SV=1	--	--	CLAVATA3/ESR (CLE)-related protein 41-like [Ziziphus jujuba]
BMK_Unigene_081095	--	--	Molecular Function: molecular_function (GO:0003674);; Molecular Function: DNA-binding transcription factor activity (GO:0003700);; Molecular Function: protein binding (GO:0005515);; Cellular Component: cellular_component (GO:0005575);; Biological Process: regulation of transcription, DNA-templated (GO:0006355);; Biological Process: biological_process (GO:0008150);; Molecular Function: zinc ion bi…	K12135|1.4e-06|thj:104802991|K12135 zinc finger protein CONSTANS | (RefSeq) zinc finger protein CONSTANS-LIKE 2-like	[K]	Transcription	CCT motif;; B-box zinc finger	Zinc finger protein CONSTANS-LIKE 16 OS=Arabidopsis thaliana OX=3702 GN=COL16 PE=1 SV=2	Zinc finger protein CONSTANS-LIKE 16 OS=Morella rubra OX=262757 GN=CJ030_MR3G018958 PE=3 SV=1	K	Transcription	zinc finger protein CONSTANS-LIKE 16-like [Ziziphus jujuba]
BMK_Unigene_153111	[J]	Translation, ribosomal structure and biogenesis	Molecular Function: metal ion binding (GO:0046872);;	K10666|6.1e-144|zju:107417302|K10666 E3 ubiquitin-protein ligase RNF5 [EC:2.3.2.27] | (RefSeq) E3 ubiquitin-protein ligase RMA1H1	[O]	Posttranslational modification, protein turnover, chaperones	Zinc finger, C3HC4 type (RING finger);; RING-type zinc-finger;; Zinc finger, C3HC4 type (RING finger);; Ring finger domain;; Zinc finger, C3HC4 type (RING finger);; zinc-RING finger domain;; zinc finger of C3HC4-type, RING;; RNA recognition motif. (a.k.a. RRM, RBD, or RNP domain)	E3 ubiquitin-protein ligase RMA1H1 OS=Capsicum annuum OX=4072 GN=RMA1H1 PE=1 SV=1	TNF receptor-associated factor OS=Trema orientale OX=63057 GN=TorRG33x02_163570 PE=4 SV=1	O	Posttranslational modification, protein turnover, chaperones	E3 ubiquitin-protein ligase RMA1H1 [Ziziphus jujuba]
BMK_Unigene_076582	--	--	Molecular Function: transferase activity, transferring acyl groups other than amino-acyl groups (GO:0016747);;	K19861|1.5e-181|zju:107432782|K19861 benzyl alcohol O-benzoyltransferase [EC:2.3.1.196 2.3.1.232] | (RefSeq) benzyl alcohol O-benzoyltransferase-like	--	--	Transferase family	Benzyl alcohol O-benzoyltransferase OS=Nicotiana tabacum OX=4097 GN=HSR201 PE=1 SV=1	Uncharacterized protein (Fragment) OS=Prunus persica OX=3760 GN=PRUPE_ppa016489mg PE=3 SV=1	S	Function unknown	benzyl alcohol O-benzoyltransferase-like [Ziziphus jujuba]
BMK_Unigene_320590	[O]	Posttranslational modification, protein turnover, chaperones	Molecular Function: serine-type endopeptidase activity (GO:0004252);; Biological Process: proteolysis (GO:0006508);;	K01312|4.3e-24|mpp:MICPUCDRAFT_11334|K01312 trypsin [EC:3.4.21.4] | (RefSeq) hypothetical protein	[E]	Amino acid transport and metabolism	Trypsin;; Trypsin-like peptidase domain	Glucanase inhibitor protein 3 OS=Phytophthora infestans OX=4787 GN=GIP3 PE=1 SV=1	Peptidase S1 domain-containing protein OS=Pythium brassicum OX=1485010 GN=PybrP1_005985 PE=3 SV=1	O	Posttranslational modification, protein turnover, chaperones	hypothetical protein BN1723_002791 [Verticillium longisporum]
BMK_Unigene_145088	--	--	Molecular Function: SNARE binding (GO:0000149);; Molecular Function: molecular_function (GO:0003674);; Molecular Function: soluble NSF attachment protein activity (GO:0005483);; Molecular Function: binding (GO:0005488);; Molecular Function: protein binding (GO:0005515);; Cellular Component: cellular_component (GO:0005575);; Cellular Component: intracellular (GO:0005622);; Cellular Component: obso…	K21198|7.8e-115|zju:107418601|K21198 gamma-soluble NSF attachment protein | (RefSeq) gamma-soluble NSF attachment protein-like	[U]	Intracellular trafficking, secretion, and vesicular transport	Soluble NSF attachment protein, SNAP	Gamma-soluble NSF attachment protein OS=Arabidopsis thaliana OX=3702 GN=GSNAP PE=2 SV=1	NSF attachment protein OS=Parasponia andersonii OX=3476 GN=PanWU01x14_129580 PE=3 SV=1	U	Intracellular trafficking, secretion, and vesicular transport	gamma-soluble NSF attachment protein-like [Ziziphus jujuba]
BMK_Unigene_078226	[O]	Posttranslational modification, protein turnover, chaperones	Cellular Component: integral component of membrane (GO:0016021);;	K09531|9.2e-143|zju:107430290|K09531 DnaJ homolog subfamily C member 11 | (RefSeq) chaperone protein dnaJ 13	[O]	Posttranslational modification, protein turnover, chaperones	DnaJ domain;; Domain of unknown function (DUF3395)	Chaperone protein dnaJ 13 OS=Arabidopsis thaliana OX=3702 GN=ATJ13 PE=1 SV=2	Chaperone protein dnaJ 13 OS=Morus notabilis OX=981085 GN=L484_011810 PE=4 SV=1	O	Posttranslational modification, protein turnover, chaperones	chaperone protein dnaJ 13 [Ziziphus jujuba]
BMK_Unigene_150107	[DPM]	--	Molecular Function: copper ion binding (GO:0005507);; Biological Process: lignin catabolic process (GO:0046274);; Cellular Component: apoplast (GO:0048046);; Molecular Function: hydroquinone:oxygen oxidoreductase activity (GO:0052716);;	K05909|1.1e-295|zju:107430727|K05909 laccase [EC:1.10.3.2] | (RefSeq) laccase-7-like isoform X1	[Q]	Secondary metabolites biosynthesis, transport and catabolism	Multicopper oxidase;; Multicopper oxidase;; Multicopper oxidase	Laccase-7 OS=Arabidopsis thaliana OX=3702 GN=LAC7 PE=2 SV=1	Laccase OS=Manihot esculenta OX=3983 GN=MANES_08G083300 PE=3 SV=1	Q	Secondary metabolites biosynthesis, transport and catabolism	laccase-7-like isoform X2 [Ziziphus jujuba]
BMK_Unigene_081461	--	--	--	--	--	--	--	--	--	--	--	serrate RNA effector molecule-like [Ziziphus jujuba]
BMK_Unigene_071753	--	--	Molecular Function: GTP binding (GO:0005525);;	K07952|7.1e-96|zju:107414454|K07952 ADP-ribosylation factor related protein 1 | (RefSeq) ADP-ribosylation factor-related protein 1 isoform X1	[U]	Intracellular trafficking, secretion, and vesicular transport	ADP-ribosylation factor family;; Ras of Complex, Roc, domain of DAPkinase;; 50S ribosome-binding GTPase;; Ras family;; Signal recognition particle receptor beta subunit;; Gtr1/RagA G protein conserved region	ADP-ribosylation factor-like protein 13B OS=Chlamydomonas reinhardtii OX=3055 GN=ARL13 PE=1 SV=1	Uncharacterized protein OS=Carpinus fangiana OX=176857 GN=FH972_008305 PE=4 SV=1	U	Intracellular trafficking, secretion, and vesicular transport	ADP-ribosylation factor-related protein 1 isoform X1 [Ziziphus jujuba]
BMK_Unigene_075113	[R]	General function prediction only	Molecular Function: alcohol dehydrogenase activity, zinc-dependent (GO:0004024);; Cellular Component: cytosol (GO:0005829);; Molecular Function: zinc ion binding (GO:0008270);; Biological Process: formaldehyde catabolic process (GO:0046294);; Molecular Function: S-(hydroxymethyl)glutathione dehydrogenase activity (GO:0051903);;	K00121|1.1e-183|zju:107420743|K00121 S-(hydroxymethyl)glutathione dehydrogenase / alcohol dehydrogenase [EC:1.1.1.284 1.1.1.1] | (RefSeq) alcohol dehydrogenase-like 2 isoform X1	[Q]	Secondary metabolites biosynthesis, transport and catabolism	Alcohol dehydrogenase GroES-like domain	Alcohol dehydrogenase-like 2 OS=Arabidopsis thaliana OX=3702 GN=At1g22440 PE=2 SV=1	GroES-like zinc-binding dehydrogenase family protein isoform 1 OS=Theobroma cacao OX=3641 GN=TCM_034862 PE=3 SV=1	Q	Secondary metabolites biosynthesis, transport and catabolism	alcohol dehydrogenase-like 2 isoform X1 [Ziziphus jujuba]
BMK_Unigene_076112	--	--	Molecular Function: molecular_function (GO:0003674);; Molecular Function: binding (GO:0005488);; Biological Process: regulation of transcription, DNA-templated (GO:0006355);; Biological Process: cellular protein modification process (GO:0006464);; Biological Process: nitrogen compound metabolic process (GO:0006807);; Biological Process: regulation of nitrogen utilization (GO:0006808);; Biological…	--	--	--	ACT domain;; ACT domain;; ACT domain	ACT domain-containing protein ACR6 OS=Arabidopsis thaliana OX=3702 GN=ACR6 PE=1 SV=1	Uncharacterized protein OS=Prunus persica OX=3760 GN=PRUPE_3G308800 PE=4 SV=1	S	Function unknown	ACT domain-containing protein ACR6-like [Ziziphus jujuba]
BMK_Unigene_151112	[P]	Inorganic ion transport and metabolism	Cellular Component: cellular_component (GO:0005575);; Cellular Component: intracellular (GO:0005622);; Cellular Component: obsolete cell (GO:0005623);; Cellular Component: cytoplasm (GO:0005737);; Biological Process: organelle organization (GO:0006996);; Biological Process: multicellular organism development (GO:0007275);; Biological Process: biological_process (GO:0008150);; Cellular Component: …	K05794|1.7e-18|ccaj:109794752|K05794 tellurite resistance protein TerC | (RefSeq) uncharacterized protein LOC109794752	--	--	Integral membrane protein TerC family	Thylakoid membrane protein TERC, chloroplastic OS=Arabidopsis thaliana OX=3702 GN=TERC PE=1 SV=1	PREDICTED: thylakoid membrane OS=Prunus dulcis OX=3755 GN=ALMOND_2B010083 PE=4 SV=1	P	Inorganic ion transport and metabolism	thylakoid membrane protein TERC, chloroplastic [Ziziphus jujuba]
BMK_Unigene_129016	--	--	Molecular Function: GTPase activity (GO:0003924);; Molecular Function: GTP binding (GO:0005525);; Biological Process: small GTPase mediated signal transduction (GO:0007264);;	K04392|6.8e-69|qsu:112040515|K04392 Ras-related C3 botulinum toxin substrate 1 | (RefSeq) ras-related C3 botulinum toxin substrate 1-like isoform X1	[R]	General function prediction only	Ras family;; Ras of Complex, Roc, domain of DAPkinase;; ADP-ribosylation factor family	Rac-like GTP-binding protein 7 OS=Oryza sativa subsp. japonica OX=39947 GN=RAC7 PE=2 SV=1	Uncharacterized protein OS=Thraustotheca clavata OX=74557 GN=THRCLA_04501 PE=4 SV=1	V	Defense mechanisms	GTP binding protein Rac1 [Hesseltinella vesiculosa]
BMK_Unigene_127248	[O]	Posttranslational modification, protein turnover, chaperones	Molecular Function: cysteine-type peptidase activity (GO:0008234);;	K16292|2.0e-88|smo:SELMODRAFT_428615|K16292 KDEL-tailed cysteine endopeptidase [EC:3.4.22.-] | (RefSeq) hypothetical protein	[O]	Posttranslational modification, protein turnover, chaperones	Papain family cysteine protease;; Cathepsin propeptide inhibitor domain (I29)	Actinidain OS=Actinidia deliciosa OX=3627 PE=1 SV=1	Actinidin Act1b OS=Actinidia arguta OX=64478 PE=1 SV=1	O	Posttranslational modification, protein turnover, chaperones	RecName: Full=Actinidain; Short=Actinidin; AltName: Full=Allergen Act d 1; AltName: Allergen=Act d 1; Flags: Precursor [Actinidia deliciosa]
BMK_Unigene_155471	[F]	Nucleotide transport and metabolism	Molecular Function: adenylate kinase activity (GO:0004017);; Molecular Function: ATP binding (GO:0005524);;	K00939|5.9e-194|zju:107427278|K00939 adenylate kinase [EC:2.7.4.3] | (RefSeq) adenylate kinase 5, chloroplastic	[F]	Nucleotide transport and metabolism	Adenylate kinase;; AAA domain;; Domain of unknown function (DUF1995)	Adenylate kinase 5, chloroplastic OS=Arabidopsis thaliana OX=3702 GN=At5g35170 PE=1 SV=1	ATP:AMP phosphotransferase OS=Morus notabilis OX=981085 GN=L484_013024 PE=3 SV=1	F	Nucleotide transport and metabolism	adenylate kinase 5, chloroplastic [Ziziphus jujuba]
BMK_Unigene_145318	--	--	Molecular Function: zinc ion transmembrane transporter activity (GO:0005385);; Cellular Component: membrane (GO:0016020);; Cellular Component: integral component of membrane (GO:0016021);; Biological Process: metal ion transport (GO:0030001);; Molecular Function: metal ion transmembrane transporter activity (GO:0046873);; Biological Process: transmembrane transport (GO:0055085);;	K14709|3.5e-149|zju:107416694|K14709 solute carrier family 39 (zinc transporter), member 1/2/3 | (RefSeq) zinc transporter 1-like	[P]	Inorganic ion transport and metabolism	ZIP Zinc transporter;; ZIP Zinc transporter	Zinc transporter 1 OS=Arabidopsis thaliana OX=3702 GN=ZIP1 PE=2 SV=1	Uncharacterized protein OS=Citrus unshiu OX=55188 GN=CUMW_002780 PE=3 SV=1	P	Inorganic ion transport and metabolism	zinc transporter 1-like [Ziziphus jujuba]
BMK_Unigene_325995	[J]	Translation, ribosomal structure and biogenesis	Molecular Function: structural constituent of ribosome (GO:0003735);; Cellular Component: ribosome (GO:0005840);; Biological Process: translation (GO:0006412);;	K02894|1.6e-65|qsu:111998240|K02894 large subunit ribosomal protein L23e | (RefSeq) 60S ribosomal protein L23-A-like	[J]	Translation, ribosomal structure and biogenesis	Ribosomal protein L14p/L23e	60S ribosomal protein L23 OS=Arabidopsis thaliana OX=3702 GN=RPL23A PE=2 SV=3	Predicted protein OS=Hordeum vulgare subsp. vulgare OX=112509 PE=2 SV=1	J	Translation, ribosomal structure and biogenesis	uncharacterized protein D7B24_003697 [Verticillium nonalfalfae]
BMK_Unigene_143657	--	--	Cellular Component: endoplasmic reticulum membrane (GO:0005789);; Cellular Component: integral component of membrane (GO:0016021);;	K20721|2.2e-50|lang:109354617|K20721 reticulon-1 | (RefSeq) reticulon-like protein B1	[U]	Intracellular trafficking, secretion, and vesicular transport	Reticulon	Reticulon-like protein B8 OS=Arabidopsis thaliana OX=3702 GN=RTNLB8 PE=2 SV=1	Reticulon-like protein (Fragment) OS=Davidia involucrata OX=16924 GN=Din_026732 PE=4 SV=1	U	Intracellular trafficking, secretion, and vesicular transport	reticulon-like protein B8 [Ziziphus jujuba]
BMK_Unigene_082426	[L]	Replication, recombination and repair	Molecular Function: endonuclease activity (GO:0004519);; Molecular Function: ATP binding (GO:0005524);; Biological Process: mismatch repair (GO:0006298);; Molecular Function: ATPase activity (GO:0016887);; Molecular Function: mismatched DNA binding (GO:0030983);; Biological Process: negative regulation of DNA recombination (GO:0045910);;	K07456|6.3e-271|zju:107424019|K07456 DNA mismatch repair protein MutS2 | (RefSeq) uncharacterized protein LOC107424019	--	--	MutS domain V;; Smr domain	--	Smr domain-containing protein OS=Carpinus fangiana OX=176857 GN=FH972_000431 PE=4 SV=1	L	Replication, recombination and repair	uncharacterized protein LOC107424019 [Ziziphus jujuba]
BMK_Unigene_104796	--	--	Molecular Function: structural constituent of ribosome (GO:0003735);; Cellular Component: ribosome (GO:0005840);; Biological Process: translation (GO:0006412);;	K02891|1.4e-26|cre:CHLREDRAFT_195131|K02891 large subunit ribosomal protein L22e | (RefSeq) RPL22; ribosomal protein L22	[J]	Translation, ribosomal structure and biogenesis	Ribosomal L22e protein family	60S ribosomal protein L22-3 OS=Arabidopsis thaliana OX=3702 GN=RPL22C PE=2 SV=1	60S ribosomal protein L22 (Fragment) OS=Anthurium amnicola OX=1678845 GN=RpL22 PE=3 SV=1	J	Translation, ribosomal structure and biogenesis	ribosomal protein L22e [Sphaeroforma arctica JP610]
BMK_Unigene_146138	[G]	Carbohydrate transport and metabolism	Molecular Function: molecular_function (GO:0003674);; Molecular Function: catalytic activity (GO:0003824);; Molecular Function: hydrolase activity, hydrolyzing O-glycosyl compounds (GO:0004553);; Molecular Function: polygalacturonase activity (GO:0004650);; Cellular Component: cellular_component (GO:0005575);; Cellular Component: cell wall (GO:0005618);; Cellular Component: obsolete cell (GO:0005…	K01213|3.3e-146|aip:107645968|K01213 galacturan 1,4-alpha-galacturonidase [EC:3.2.1.67] | (RefSeq) polygalacturonase At1g48100-like	--	--	Glycosyl hydrolases family 28;; Glycosyl hydrolases family 28	Polygalacturonase At1g48100 OS=Arabidopsis thaliana OX=3702 GN=At1g48100 PE=2 SV=1	Uncharacterized protein OS=Morella rubra OX=262757 GN=CJ030_MR5G021917 PE=3 SV=1	G	Carbohydrate transport and metabolism	polygalacturonase At1g48100-like [Ziziphus jujuba]
BMK_Unigene_307001	--	--	Molecular Function: microfilament motor activity (GO:0000146);; Molecular Function: nucleotide binding (GO:0000166);; Cellular Component: contractile vacuole (GO:0000331);; Molecular Function: molecular_function (GO:0003674);; Molecular Function: motor activity (GO:0003774);; Molecular Function: actin binding (GO:0003779);; Molecular Function: catalytic activity (GO:0003824);; Molecular Function:…	K10357|2.9e-06|smo:SELMODRAFT_98074|K10357 myosin V | (RefSeq) hypothetical protein	[N]	Cell motility	Myosin head (motor domain)	--	Uncharacterized protein OS=Arabidopsis lyrata subsp. lyrata OX=81972 GN=ARALYDRAFT_319536 PE=3 SV=1	Z	Cytoskeleton	hypothetical protein LY90DRAFT_667644 [Neocallimastix californiae]
BMK_Unigene_154828	--	--	Molecular Function: peptidyl-prolyl cis-trans isomerase activity (GO:0003755);; Cellular Component: integral component of membrane (GO:0016021);;	--	--	--	Cotton fibre expressed protein	Peptidyl-prolyl cis-trans isomerase FKBP20-2, chloroplastic OS=Arabidopsis thaliana OX=3702 GN=FKBP20-2 PE=1 SV=1	Peptidylprolyl isomerase OS=Morus notabilis OX=981085 GN=L484_021832 PE=4 SV=1	O	Posttranslational modification, protein turnover, chaperones	peptidyl-prolyl cis-trans isomerase FKBP20-2, chloroplastic [Ziziphus jujuba]
BMK_Unigene_135288	--	--	--	--	--	--	--	--	Uncharacterized protein OS=Manihot esculenta OX=3983 GN=MANES_16G038800 PE=4 SV=1	--	--	hypothetical protein MANES_16G038800 [Manihot esculenta]
BMK_Unigene_080883	--	--	Molecular Function: calcium ion binding (GO:0005509);; Cellular Component: integral component of membrane (GO:0016021);;	K01859|3.3e-201|sita:101771169|K01859 chalcone isomerase [EC:5.5.1.6] | (RefSeq) vacuolar-sorting receptor 1	--	--	PA domain	Vacuolar-sorting receptor 1 OS=Arabidopsis thaliana OX=3702 GN=VSR1 PE=1 SV=2	Vacuolar sorting receptor homolog 1 OS=Prunus dulcis OX=3755 GN=Prudu_018010 PE=3 SV=1	T	Signal transduction mechanisms	vacuolar-sorting receptor 1-like [Ziziphus jujuba]
BMK_Unigene_150274	--	--	Molecular Function: protein binding (GO:0005515);; Cellular Component: cellular_component (GO:0005575);; Cellular Component: obsolete cell (GO:0005623);; Cellular Component: plasma membrane (GO:0005886);; Biological Process: cell communication (GO:0007154);; Biological Process: signal transduction (GO:0007165);; Biological Process: biological_process (GO:0008150);; Biological Process: response to…	K01866|5.9e-07|gra:105775527|K01866 tyrosyl-tRNA synthetase [EC:6.1.1.1] | (RefSeq) uncharacterized LOC105775527	[R]	General function prediction only	Leucine rich repeat;; Leucine Rich repeats (2 copies);; Leucine Rich Repeat;; Leucine Rich repeat	Plant intracellular Ras-group-related LRR protein 4 OS=Arabidopsis thaliana OX=3702 GN=PIRL4 PE=1 SV=1	Uncharacterized protein OS=Manihot esculenta OX=3983 GN=MANES_02G116100 PE=4 SV=1	S	Function unknown	plant intracellular Ras-group-related LRR protein 4 [Ziziphus jujuba]
BMK_Unigene_077858	--	--	Molecular Function: GTPase activity (GO:0003924);; Molecular Function: GTP binding (GO:0005525);;	--	[UR]	--	Dynamin central region;; Dynamin GTPase effector domain	Dynamin-related protein 4C OS=Arabidopsis thaliana OX=3702 GN=DRP4C PE=2 SV=1	Uncharacterized protein OS=Fagus sylvatica OX=28930 GN=FSB_LOCUS56493 PE=4 SV=1	U	Intracellular trafficking, secretion, and vesicular transport	dynamin-related protein 4C-like isoform X1 [Ziziphus jujuba]
BMK_Unigene_116458	[R]	General function prediction only	Molecular Function: molecular_function (GO:0003674);; Molecular Function: catalytic activity (GO:0003824);; Biological Process: nucleobase-containing compound metabolic process (GO:0006139);; Biological Process: cellular aromatic compound metabolic process (GO:0006725);; Biological Process: obsolete coenzyme metabolic process (GO:0006732);; Biological Process: obsolete oxidoreduction coenzyme met…	K00010|4.0e-11|gsl:Gasu_22160|K00010 myo-inositol 2-dehydrogenase / D-chiro-inositol 1-dehydrogenase [EC:1.1.1.18 1.1.1.369] | (RefSeq) myo-inositol 2-dehydrogenase	[R]	General function prediction only	Oxidoreductase family, C-terminal alpha/beta domain;; Oxidoreductase family, NAD-binding Rossmann fold	--	Uncharacterized protein OS=Carpinus fangiana OX=176857 GN=FH972_024512 PE=4 SV=1	S	Function unknown	hypothetical protein BOTBODRAFT_57915 [Botryobasidium botryosum FD-172 SS1]
BMK_Unigene_112430	--	--	Biological Process: defense response (GO:0006952);; Cellular Component: integral component of membrane (GO:0016021);;	--	--	--	Gamma-thionin family	Defensin-like protein OS=Glycine max OX=3847 PE=3 SV=1	Knot1 domain-containing protein OS=Prunus persica OX=3760 GN=PRUPE_ppa013508mg PE=4 SV=1	O	Posttranslational modification, protein turnover, chaperones	defensin-like protein 1 [Ziziphus jujuba]
BMK_Unigene_072393	--	--	--	K22763|4.8e-42|cann:107859727|K22763 deubiquitinase DESI2 [EC:3.4.19.12] | (RefSeq) deSI-like protein At4g17486	[S]	Function unknown	PPPDE putative peptidase domain	--	DUF862 domain-containing protein OS=Trema orientale OX=63057 GN=TorRG33x02_073650 PE=3 SV=1	S	Function unknown	deubiquitinase DESI2-like [Ziziphus jujuba]
BMK_Unigene_275509	--	--	Molecular Function: structural constituent of ribosome (GO:0003735);; Cellular Component: ribosome (GO:0005840);; Biological Process: translation (GO:0006412);;	K02901|3.5e-28|smo:SELMODRAFT_166700|K02901 large subunit ribosomal protein L27e | (RefSeq) hypothetical protein	[J]	Translation, ribosomal structure and biogenesis	Ribosomal L27e protein family;; KOW motif	60S ribosomal protein L27 OS=Pyrobotrys stellata OX=3064 GN=RPL27 PE=2 SV=1	60S ribosomal protein L27 OS=Anthurium amnicola OX=1678845 GN=Rpl27_0 PE=3 SV=1	J	Translation, ribosomal structure and biogenesis	60S ribosomal protein L27-A [Bifiguratus adelaidae]
BMK_Unigene_115901	--	--	--	--	--	--	--	--	--	--	--	hypothetical protein M407DRAFT_34167 [Tulasnella calospora MUT 4182]
BMK_Unigene_171428	[O]	Posttranslational modification, protein turnover, chaperones	Biological Process: glycerol ether metabolic process (GO:0006662);; Molecular Function: protein disulfide oxidoreductase activity (GO:0015035);; Biological Process: cell redox homeostasis (GO:0045454);;	K03671|4.1e-22|olu:OSTLU_26095|K03671 thioredoxin 1 | (RefSeq) predicted protein	[O]	Posttranslational modification, protein turnover, chaperones	Thioredoxin;; AhpC/TSA family;; Thioredoxin-like	Thioredoxin H-type OS=Picea mariana OX=3335 GN=SB09 PE=2 SV=1	Thioredoxin OS=Phaeodactylum tricornutum (strain CCAP 1055/1) OX=556484 GN=Trx-h1 PE=3 SV=1	O	Posttranslational modification, protein turnover, chaperones	thioredoxin h [Phaeodactylum tricornutum CCAP 1055/1]
BMK_Unigene_083894	--	--	Biological Process: carbohydrate metabolic process (GO:0005975);; Cellular Component: integral component of membrane (GO:0016021);; Molecular Function: lyase activity (GO:0016829);; Molecular Function: carbohydrate binding (GO:0030246);;	K18195|0.0e+00|zju:107425104|K18195 rhamnogalacturonan endolyase [EC:4.2.2.23] | (RefSeq) uncharacterized protein LOC107425104 isoform X1	--	--	Rhamnogalacturonate lyase family;; Polysaccharide lyase family 4, domain III;; Polysaccharide lyase family 4, domain II	--	Rhamnogalacturonan endolyase OS=Trema orientale OX=63057 GN=TorRG33x02_071310 PE=3 SV=1	S	Function unknown	uncharacterized protein LOC107425104 isoform X1 [Ziziphus jujuba]
BMK_Unigene_156815	--	--	Molecular Function: structural constituent of ribosome (GO:0003735);; Cellular Component: ribosome (GO:0005840);; Biological Process: translation (GO:0006412);;	--	--	--	--	--	--	--	--	--
BMK_Unigene_131567	--	--	Biological Process: DNA replication (GO:0006260);; Cellular Component: host cell nucleus (GO:0042025);;	K03505|6.5e-62|zju:107404725|K03505 DNA polymerase delta subunit 4 | (RefSeq) DNA polymerase delta subunit 4	--	--	DNA polymerase delta, subunit 4	--	Uncharacterized protein OS=Coffea canephora OX=49390 GN=GSCOC_T00007402001 PE=4 SV=1	S	Function unknown	DNA polymerase delta subunit 4 [Ziziphus jujuba]
BMK_Unigene_142733	--	--	Molecular Function: GTP binding (GO:0005525);;	--	--	--	AIG1 family;; 50S ribosome-binding GTPase;; Ferrous iron transport protein B	Immune-associated nucleotide-binding protein 9 OS=Arabidopsis thaliana OX=3702 GN=IAN9 PE=2 SV=1	AIG1-type G domain-containing protein OS=Populus alba OX=43335 GN=D5086_0000030440 PE=4 SV=1	S	Function unknown	immune-associated nucleotide-binding protein 9-like [Ziziphus jujuba]
BMK_Unigene_059273	--	--	Molecular Function: metalloendopeptidase activity (GO:0004222);; Molecular Function: ATP binding (GO:0005524);; Molecular Function: zinc ion binding (GO:0008270);; Cellular Component: integral component of membrane (GO:0016021);;	K08956|9.9e-13|dzi:111285969|K08956 AFG3 family protein [EC:3.4.24.-] | (RefSeq) ATP-dependent zinc metalloprotease FTSH 10, mitochondrial-like	[O]	Posttranslational modification, protein turnover, chaperones	--	ATP-dependent zinc metalloprotease FTSH 3, mitochondrial OS=Arabidopsis thaliana OX=3702 GN=FTSH3 PE=1 SV=1	AAA domain-containing protein OS=Fagus sylvatica OX=28930 GN=FSB_LOCUS43420 PE=3 SV=1	O	Posttranslational modification, protein turnover, chaperones	hypothetical protein TEA_021927 [Camellia sinensis var. sinensis]
BMK_Unigene_130753	[IQ]	--	Biological Process: fatty acid biosynthetic process (GO:0006633);;	K15620|5.5e-23|qsu:112020246|K15620 golgi phosphoprotein 3 | (RefSeq) vacuolar protein sorting-associated protein 74-like	[CIQ]	--	Phosphopantetheine attachment site	Acyl carrier protein 2, mitochondrial OS=Arabidopsis thaliana OX=3702 GN=MTACP2 PE=1 SV=1	Acyl carrier protein OS=Anthurium amnicola OX=1678845 GN=nuo-12_2 PE=3 SV=1	I	Lipid transport and metabolism	hypothetical protein M407DRAFT_242876 [Tulasnella calospora MUT 4182]
BMK_Unigene_302086	[E]	Amino acid transport and metabolism	Molecular Function: catalytic activity (GO:0003824);;	K05396|2.1e-61|ath:AT1G48420|K05396 D-cysteine desulfhydrase [EC:4.4.1.15] | (RefSeq) D-CDES; D-cysteine desulfhydrase	--	--	--	Bifunctional D-cysteine desulfhydrase/1-aminocyclopropane-1-carboxylate deaminase, mitochondrial OS=Arabidopsis thaliana OX=3702 GN=DCD PE=1 SV=1	DCD OS=Arabidopsis thaliana OX=3702 GN=AXX17_At1g42510 PE=3 SV=1	E	Amino acid transport and metabolism	DCD [Arabidopsis thaliana]
BMK_Unigene_081157	--	--	Molecular Function: ferroxidase activity (GO:0004322);; Molecular Function: copper ion binding (GO:0005507);; Cellular Component: plasma membrane (GO:0005886);; Biological Process: iron ion transport (GO:0006826);; Molecular Function: L-ascorbate oxidase activity (GO:0008447);; Biological Process: iron ion homeostasis (GO:0055072);;	K19791|1.6e-198|han:110912433|K19791 iron transport multicopper oxidase | (RefSeq) L-ascorbate oxidase homolog	[Q]	Secondary metabolites biosynthesis, transport and catabolism	Multicopper oxidase;; Multicopper oxidase;; Multicopper oxidase	L-ascorbate oxidase homolog OS=Brassica napus OX=3708 GN=Bp10 PE=2 SV=1	Multicopper oxidase, putative OS=Ricinus communis OX=3988 GN=RCOM_0615790 PE=3 SV=1	Q	Secondary metabolites biosynthesis, transport and catabolism	L-ascorbate oxidase homolog [Ricinus communis]
BMK_Unigene_131716	--	--	Molecular Function: RNA polymerase II transcription regulatory region sequence-specific DNA binding (GO:0000977);; Molecular Function: purine-rich negative regulatory element binding (GO:0032422);;	--	--	--	--	--	--	--	--	--
BMK_Unigene_157335	[C]	Energy production and conversion	Cellular Component: mitochondrion (GO:0005739);; Molecular Function: NADH dehydrogenase (ubiquinone) activity (GO:0008137);; Cellular Component: integral component of membrane (GO:0016021);; Biological Process: ATP synthesis coupled electron transport (GO:0042773);;	K05573|4.6e-07|ppp:2546809|K05573 NAD(P)H-quinone oxidoreductase subunit 2 [EC:7.1.1.2] | (RefSeq) ndhB, PhpapaCp003; NADH dehydrogenase subunit 2	[C]	Energy production and conversion	Proton-conducting membrane transporter	NAD(P)H-quinone oxidoreductase subunit 2, chloroplastic OS=Marchantia polymorpha OX=3197 GN=ndhB PE=3 SV=1	NADH dehydrogenase subunit 2 OS=Melosira undulata OX=2133757 GN=nad2 PE=3 SV=1	--	--	NADH dehydrogenase subunit 2, partial [Amorphotheca resinae]
BMK_Unigene_292239	[J]	Translation, ribosomal structure and biogenesis	Biological Process: telomere maintenance (GO:0000723);; Molecular Function: DNA helicase activity (GO:0003678);; Molecular Function: structural constituent of ribosome (GO:0003735);; Molecular Function: ATP binding (GO:0005524);; Cellular Component: ribosome (GO:0005840);; Biological Process: DNA repair (GO:0006281);; Biological Process: DNA recombination (GO:0006310);; Biological Process: transl…	K02922|2.5e-22|gsl:Gasu_50890|K02922 large subunit ribosomal protein L37e | (RefSeq) 60S ribosomal protein L37e	[J]	Translation, ribosomal structure and biogenesis	Ribosomal protein L37e	60S ribosomal protein L37-2 OS=Arabidopsis thaliana OX=3702 GN=RPL37B PE=3 SV=2	ATP-dependent DNA helicase OS=Pythium insidiosum OX=114742 GN=PINS_007825 PE=3 SV=1	J	Translation, ribosomal structure and biogenesis	hypothetical protein CAUPRSCDRAFT_9697 [Caulochytrium protostelioides]
BMK_Unigene_073157	--	--	--	--	--	--	Protein of unknown function (DUF688)	--	Uncharacterized protein OS=Fagus sylvatica OX=28930 GN=FSB_LOCUS8969 PE=4 SV=1	--	--	hypothetical protein FNV43_RR12657 [Rhamnella rubrinervis]
BMK_Unigene_077584	[HR]	--	Molecular Function: hydrolase activity (GO:0016787);;	K08726|8.1e-34|sbi:8071538|K08726 soluble epoxide hydrolase / lipid-phosphate phosphatase [EC:3.3.2.10 3.1.3.76] | (RefSeq) uncharacterized protein LOC8071538	[I]	Lipid transport and metabolism	alpha/beta hydrolase fold;; Serine aminopeptidase, S33;; Alpha/beta hydrolase family	--	Epoxide hydrolase-like OS=Trema orientale OX=63057 GN=TorRG33x02_163810 PE=4 SV=1	I	Lipid transport and metabolism	bifunctional epoxide hydrolase 2-like [Ziziphus jujuba]
BMK_Unigene_160430	[J]	Translation, ribosomal structure and biogenesis	Molecular Function: structural constituent of ribosome (GO:0003735);; Biological Process: translation (GO:0006412);; Cellular Component: large ribosomal subunit (GO:0015934);;	K02898|6.6e-37|cann:107858642|K02898 large subunit ribosomal protein L26e | (RefSeq) 60S ribosomal protein L26-1	[J]	Translation, ribosomal structure and biogenesis	Ribosomal proteins L26 eukaryotic, L24P archaeal	60S ribosomal protein L26-1 OS=Arabidopsis thaliana OX=3702 GN=RPL26A PE=2 SV=2	60S ribosomal protein L26 OS=Amphidinium carterae OX=2961 PE=2 SV=1	J	Translation, ribosomal structure and biogenesis	Ribosomal protein L26/L24P, eukaryotic/archaeal, partial [Metarhizium brunneum ARSEF 3297]
BMK_Unigene_070282	--	--	--	--	[U]	Intracellular trafficking, secretion, and vesicular transport	--	--	PREDICTED: protodermal factor OS=Prunus dulcis OX=3755 GN=ALMOND_2B011331 PE=4 SV=1	U	Intracellular trafficking, secretion, and vesicular transport	hypothetical protein FNV43_RR23242 [Rhamnella rubrinervis]
BMK_Unigene_113221	--	--	Molecular Function: cysteine-type peptidase activity (GO:0008234);;	K16292|1.0e-16|vvi:100247167|K16292 KDEL-tailed cysteine endopeptidase [EC:3.4.22.-] | (RefSeq) senescence-specific cysteine protease SAG39	[O]	Posttranslational modification, protein turnover, chaperones	Cathepsin propeptide inhibitor domain (I29);; Papain family cysteine protease	Oryzain alpha chain OS=Oryza sativa subsp. japonica OX=39947 GN=Os04g0650000 PE=1 SV=2	Uncharacterized protein OS=Lotus japonicus OX=34305 PE=2 SV=1	O	Posttranslational modification, protein turnover, chaperones	unknown [Lotus japonicus]
BMK_Unigene_077311	--	--	Molecular Function: peroxidase activity (GO:0004601);; Cellular Component: extracellular region (GO:0005576);; Biological Process: response to oxidative stress (GO:0006979);; Molecular Function: heme binding (GO:0020037);; Biological Process: hydrogen peroxide catabolic process (GO:0042744);; Molecular Function: metal ion binding (GO:0046872);;	K00430|3.5e-170|zju:107425304|K00430 peroxidase [EC:1.11.1.7] | (RefSeq) peroxidase 17	--	--	Peroxidase;; Peroxidase	Peroxidase 17 OS=Arabidopsis thaliana OX=3702 GN=PER17 PE=2 SV=1	Peroxidase OS=Prunus dulcis OX=3755 GN=ALMOND_2B011534 PE=3 SV=1	Q	Secondary metabolites biosynthesis, transport and catabolism	peroxidase 17 [Ziziphus jujuba]
BMK_Unigene_071070	[T]	Signal transduction mechanisms	Molecular Function: molecular_function (GO:0003674);; Molecular Function: binding (GO:0005488);; Cellular Component: cellular_component (GO:0005575);; Cellular Component: intracellular (GO:0005622);; Cellular Component: obsolete cell (GO:0005623);; Cellular Component: cytoplasm (GO:0005737);; Cellular Component: mitochondrion (GO:0005739);; Biological Process: response to stress (GO:0006950);; Bi…	--	--	--	CBS domain;; CBS domain	CBS domain-containing protein CBSX3, mitochondrial OS=Arabidopsis thaliana OX=3702 GN=CBSX3 PE=1 SV=1	CBS domain-containing protein OS=Citrus sinensis OX=2711 GN=CISIN_1g028667mg PE=4 SV=1	S	Function unknown	CBS domain-containing protein CBSX3, mitochondrial-like isoform X2 [Ziziphus jujuba]
BMK_Unigene_000013	--	--	Molecular Function: actin binding (GO:0003779);;	K20283|2.9e-47|pmum:103337674|K20283 golgin subfamily A member 4 | (RefSeq) intracellular protein transport protein USO1	--	--	KIP1-like protein	COP1-interactive protein 1 OS=Arabidopsis thaliana OX=3702 GN=CIP1 PE=1 SV=1	COP1-interactive protein 1 OS=Prunus dulcis OX=3755 GN=Prudu_014325 PE=4 SV=1	S	Function unknown	COP1-interactive protein 1 [Ziziphus jujuba]
BMK_Unigene_156523	[G]	Carbohydrate transport and metabolism	Biological Process: regulation of transcription by RNA polymerase II (GO:0006357);; Cellular Component: Piccolo NuA4 histone acetyltransferase complex (GO:0032777);;	K10523|1.8e-170|jcu:105639144|K10523 speckle-type POZ protein | (RefSeq) BTB/POZ domain-containing protein At1g55760	[K]	Transcription	Enhancer of polycomb-like;; BTB/POZ domain	BTB/POZ domain-containing protein At1g55760 OS=Arabidopsis thaliana OX=3702 GN=At1g55760 PE=2 SV=1	Enhancer of polycomb-like protein OS=Trema orientale OX=63057 GN=TorRG33x02_291160 PE=3 SV=1	K	Transcription	uncharacterized protein LOC107412896 [Ziziphus jujuba]
BMK_Unigene_065437	--	--	Molecular Function: enzyme inhibitor activity (GO:0004857);;	--	--	--	Plant invertase/pectin methylesterase inhibitor	Cell wall / vacuolar inhibitor of fructosidase 1 OS=Arabidopsis thaliana OX=3702 GN=C/VIF1 PE=1 SV=1	Pectinesterase inhibitor domain containing protein OS=Trema orientale OX=63057 GN=TorRG33x02_110530 PE=4 SV=1	S	Function unknown	cell wall / vacuolar inhibitor of fructosidase 1-like [Ziziphus jujuba]
BMK_Unigene_146254	[V]	Defense mechanisms	Molecular Function: antiporter activity (GO:0015297);; Cellular Component: membrane (GO:0016020);; Cellular Component: integral component of membrane (GO:0016021);; Molecular Function: transmembrane transporter activity (GO:0022857);; Molecular Function: xenobiotic transmembrane transporter activity (GO:0042910);;	K03327|4.3e-280|zju:107404224|K03327 multidrug resistance protein, MATE family | (RefSeq) protein DETOXIFICATION 49-like	[R]	General function prediction only	MatE	Protein DETOXIFICATION 49 OS=Arabidopsis thaliana OX=3702 GN=DTX49 PE=2 SV=1	Protein DETOXIFICATION OS=Prunus persica OX=3760 GN=PRUPE_2G290200 PE=3 SV=1	V	Defense mechanisms	protein DETOXIFICATION 49-like [Ziziphus jujuba]
BMK_Unigene_063796	--	--	Molecular Function: UDP-glycosyltransferase activity (GO:0008194);;	K23260|9.9e-36|zju:107428410|K23260 scopoletin glucosyltransferase [EC:2.4.1.128] | (RefSeq) UDP-glucose flavonoid 3-O-glucosyltransferase 7-like	[GC]	--	UDP-glucoronosyl and UDP-glucosyl transferase	UDP-glucose flavonoid 3-O-glucosyltransferase 7 OS=Fragaria ananassa OX=3747 GN=GT7 PE=1 SV=1	Glycosyltransferase OS=Fagus sylvatica OX=28930 GN=FSB_LOCUS16503 PE=3 SV=1	--	--	UDP-glucose flavonoid 3-O-glucosyltransferase 7-like [Ziziphus jujuba]
BMK_Unigene_109204	--	--	--	--	--	--	ENTH domain	--	--	--	--	--
BMK_Unigene_141612	--	--	Molecular Function: molecular_function (GO:0003674);; Molecular Function: catalytic activity (GO:0003824);; Molecular Function: ubiquitin-protein transferase activity (GO:0004842);; Molecular Function: protein binding (GO:0005515);; Biological Process: cellular protein modification process (GO:0006464);; Biological Process: proteolysis (GO:0006508);; Biological Process: ubiquitin-dependent protei…	--	--	--	Kelch motif;; F-box domain;; F-box-like	SKP1-interacting partner 15 OS=Arabidopsis thaliana OX=3702 GN=SKIP15 PE=1 SV=1	F-box domain containing protein OS=Parasponia andersonii OX=3476 GN=PanWU01x14_036660 PE=4 SV=1	S	Function unknown	SKP1-interacting partner 15-like [Ziziphus jujuba]
BMK_Unigene_082873	[G]	Carbohydrate transport and metabolism	Molecular Function: UDP-glycosyltransferase activity (GO:0008194);;	K00927|5.0e-144|ini:109182250|K00927 phosphoglycerate kinase [EC:2.7.2.3] | (RefSeq) uncharacterized LOC109182250	[GC]	--	UDP-glucoronosyl and UDP-glucosyl transferase	UDP-glycosyltransferase 86A1 OS=Arabidopsis thaliana OX=3702 GN=UGT86A1 PE=2 SV=1	Glycosyltransferase OS=Morus notabilis OX=981085 GN=L484_024332 PE=3 SV=1	--	--	UDP-glycosyltransferase 86A1-like [Ziziphus jujuba]
BMK_Unigene_313817	--	--	Molecular Function: hydrolase activity, hydrolyzing O-glycosyl compounds (GO:0004553);; Cellular Component: cell wall (GO:0005618);; Biological Process: xyloglucan metabolic process (GO:0010411);; Cellular Component: integral component of membrane (GO:0016021);; Molecular Function: xyloglucan:xyloglucosyl transferase activity (GO:0016762);; Biological Process: cell wall biogenesis (GO:0042546);; …	K14504|6.5e-44|zju:107412146|K14504 xyloglucan:xyloglucosyl transferase TCH4 [EC:2.4.1.207] | (RefSeq) xyloglucan endotransglucosylase/hydrolase protein 22-like	--	--	Glycosyl hydrolases family 16	Probable xyloglucan endotransglucosylase/hydrolase protein 23 OS=Arabidopsis thaliana OX=3702 GN=XTH23 PE=2 SV=1	Xyloglucan endotransglucosylase/hydrolase (Fragment) OS=Davidia involucrata OX=16924 GN=Din_047124 PE=3 SV=1	G	Carbohydrate transport and metabolism	xyloglucan endotransglucosylase/hydrolase protein 22-like [Ziziphus jujuba]
BMK_Unigene_145518	--	--	Cellular Component: integral component of membrane (GO:0016021);;	K02184|7.8e-139|ini:109182789|K02184 formin 2 | (RefSeq) formin-like protein 1	[TZ]	--	Formin Homology 2 Domain	Formin-like protein 1 OS=Arabidopsis thaliana OX=3702 GN=FH1 PE=1 SV=1	Formin-like protein OS=Citrus clementina OX=85681 GN=CICLE_v10014120mg PE=3 SV=1	--	--	formin-like protein 1 [Ziziphus jujuba]
BMK_Unigene_147396	--	--	Biological Process: regulation of phosphoprotein phosphatase activity (GO:0043666);;	K17607|1.3e-166|zju:107403985|K17607 type 2A phosphatase activator TIP41 | (RefSeq) TIP41-like protein isoform X1	[S]	Function unknown	TIP41-like family	TIP41-like protein OS=Arabidopsis thaliana OX=3702 GN=TIP41L PE=2 SV=1	TIP41-like protein OS=Parasponia andersonii OX=3476 GN=PanWU01x14_048000 PE=3 SV=1	S	Function unknown	TIP41-like protein isoform X1 [Ziziphus jujuba]
BMK_Unigene_080967	[HC]	--	Biological Process: ubiquinone biosynthetic process (GO:0006744);; Molecular Function: oxidoreductase activity, acting on paired donors, with incorporation or reduction of molecular oxygen, NAD(P)H as one donor, and incorporation of one atom of oxygen (GO:0016709);; Molecular Function: oxidoreductase activity, acting on paired donors, with incorporation or reduction of molecular oxygen, reduced f…	K06126|1.2e-267|zju:107430222|K06126 ubiquinone biosynthesis monooxygenase Coq6 [EC:1.14.13.-] | (RefSeq) ubiquinone biosynthesis monooxygenase COQ6, mitochondrial isoform X1	[HC]	--	FAD binding domain;; Squalene epoxidase;; Dirigent-like protein	Disease resistance response protein 206 OS=Pisum sativum OX=3888 GN=PI206 PE=1 SV=2	Ubiquinone biosynthesis monooxygenase COQ6, mitochondrial OS=Trema orientale OX=63057 GN=COQ6 PE=3 SV=1	--	--	ubiquinone biosynthesis monooxygenase COQ6, mitochondrial isoform X1 [Ziziphus jujuba]
BMK_Unigene_312886	--	--	--	--	--	--	--	--	--	--	--	peptidase [Colletotrichum higginsianum]
BMK_Unigene_271825	--	--	--	--	--	--	--	--	F-box domain-containing protein OS=Carpinus fangiana OX=176857 GN=FH972_000451 PE=4 SV=1	S	Function unknown	F-box/kelch-repeat protein At3g23880-like [Ziziphus jujuba]
BMK_Unigene_081929	--	--	Molecular Function: molecular_function (GO:0003674);; Molecular Function: transporter activity (GO:0005215);; Molecular Function: organic acid transmembrane transporter activity (GO:0005342);; Biological Process: transport (GO:0006810);; Biological Process: ion transport (GO:0006811);; Biological Process: anion transport (GO:0006820);; Biological Process: biological_process (GO:0008150);; Molecul…	--	--	--	--	--	Uncharacterized protein OS=Carpinus fangiana OX=176857 GN=FH972_012844 PE=4 SV=1	G	Carbohydrate transport and metabolism	putative leucine-rich repeat-containing protein DDB_G0290503 isoform X1 [Ziziphus jujuba]
BMK_Unigene_267521	--	--	Molecular Function: GTPase activity (GO:0003924);; Molecular Function: GTP binding (GO:0005525);; Cellular Component: nucleus (GO:0005634);; Cellular Component: cytoplasm (GO:0005737);;	K24104|1.1e-13|qsu:111993605|K24104 GPN-loop GTPase | (RefSeq) GPN-loop GTPase 1-like	[L]	Replication, recombination and repair	--	--	GPN-loop GTPase OS=Carpinus fangiana OX=176857 GN=FH972_021909 PE=3 SV=1	L	Replication, recombination and repair	hypothetical protein M407DRAFT_77105 [Tulasnella calospora MUT 4182]
BMK_Unigene_006079	--	--	--	--	--	--	RNase H-like domain found in reverse transcriptase;; RNase H-like domain found in reverse transcriptase	--	--	--	--	--
BMK_Unigene_163706	--	--	--	--	[Z]	Cytoskeleton	--	--	--	--	--	--
BMK_Unigene_153898	[J]	Translation, ribosomal structure and biogenesis	Molecular Function: RNA binding (GO:0003723);; Biological Process: RNA processing (GO:0006396);; Cellular Component: integral component of membrane (GO:0016021);; Molecular Function: nucleotidyltransferase activity (GO:0016779);;	--	[J]	Translation, ribosomal structure and biogenesis	Poly A polymerase head domain;; Probable RNA and SrmB- binding site of polymerase A	--	Poly A polymerase OS=Parasponia andersonii OX=3476 GN=PanWU01x14_213300 PE=3 SV=1	J	Translation, ribosomal structure and biogenesis	uncharacterized protein LOC107435230 isoform X1 [Ziziphus jujuba]
BMK_Unigene_154537	[T]	Signal transduction mechanisms	Molecular Function: kinase activity (GO:0016301);; Molecular Function: carbohydrate binding (GO:0030246);;	K22133|7.4e-69|egr:104443802|K22133 oxalate---CoA ligase [EC:6.2.1.8] | (RefSeq) oxalate--CoA ligase	--	--	Legume lectin domain;; Protein kinase domain;; Protein tyrosine and serine/threonine kinase;; Bacterial lectin	L-type lectin-domain containing receptor kinase VIII.1 OS=Arabidopsis thaliana OX=3702 GN=LECRK81 PE=2 SV=1	L-type lectin-domain containing receptor kinase VIII.1 OS=Morella rubra OX=262757 GN=CJ030_MR3G009802 PE=3 SV=1	T	Signal transduction mechanisms	hypothetical protein FNV43_RR16782 [Rhamnella rubrinervis]
BMK_Unigene_082898	[E]	Amino acid transport and metabolism	Molecular Function: molecular_function (GO:0003674);; Molecular Function: glutamate N-acetyltransferase activity (GO:0004358);; Molecular Function: protein binding (GO:0005515);; Cellular Component: cellular_component (GO:0005575);; Cellular Component: intracellular (GO:0005622);; Cellular Component: obsolete cell (GO:0005623);; Cellular Component: cytoplasm (GO:0005737);; Cellular Component: end…	K00620|9.7e-141|zju:107432802|K00620 glutamate N-acetyltransferase / amino-acid N-acetyltransferase [EC:2.3.1.35 2.3.1.1] | (RefSeq) arginine biosynthesis bifunctional protein ArgJ, chloroplastic	[E]	Amino acid transport and metabolism	WD domain, G-beta repeat;; Anaphase-promoting complex subunit 4 WD40 domain;; ArgJ family	Arginine biosynthesis bifunctional protein ArgJ, chloroplastic OS=Populus trichocarpa OX=3694 GN=POPTRDRAFT_746969 PE=3 SV=2	WD_REPEATS_REGION domain-containing protein OS=Prunus persica OX=3760 GN=PRUPE_2G304700 PE=4 SV=1	S	Function unknown	WD repeat-containing protein 91 homolog [Ziziphus jujuba]
BMK_Unigene_145243	--	--	Cellular Component: integral component of membrane (GO:0016021);; Molecular Function: transmembrane transporter activity (GO:0022857);;	K12818|1.2e-14|smo:SELMODRAFT_429199|K12818 ATP-dependent RNA helicase DHX8/PRP22 [EC:3.6.4.13] | (RefSeq) hypothetical protein	[R]	General function prediction only	--	Protein ZINC INDUCED FACILITATOR 1 OS=Arabidopsis thaliana OX=3702 GN=ZIF1 PE=1 SV=2	MFS domain-containing protein OS=Populus trichocarpa OX=3694 GN=POPTR_006G026200 PE=4 SV=2	S	Function unknown	protein ZINC INDUCED FACILITATOR 1-like isoform X1 [Ziziphus jujuba]
BMK_Unigene_137649	--	--	Cellular Component: integral component of membrane (GO:0016021);;	--	--	--	AWPM-19-like family	Membrane protein PM19L OS=Oryza sativa subsp. japonica OX=39947 GN=PM19L PE=2 SV=1	AWPM-19-like OS=Trema orientale OX=63057 GN=TorRG33x02_192390 PE=4 SV=1	S	Function unknown	membrane protein PM19L [Ziziphus jujuba]
BMK_Unigene_140296	--	--	Molecular Function: ATPase activator activity (GO:0001671);; Molecular Function: chaperone binding (GO:0051087);; Molecular Function: Hsp90 protein binding (GO:0051879);;	K20224|9.5e-59|apro:F751_1339|K20224 importin-9 | (RefSeq) Importin-9	[S]	Function unknown	Activator of Hsp90 ATPase, N-terminal;; Activator of Hsp90 ATPase homolog 1-like protein	--	Activator of Hsp90 ATPase OS=Trema orientale OX=63057 GN=TorRG33x02_296890 PE=3 SV=1	O	Posttranslational modification, protein turnover, chaperones	hypothetical protein FNV43_RR16576 [Rhamnella rubrinervis]
BMK_Unigene_003350	[J]	Translation, ribosomal structure and biogenesis	Molecular Function: 3-hydroxyisobutyryl-CoA hydrolase activity (GO:0003860);;	K05605|9.9e-148|zju:107422661|K05605 3-hydroxyisobutyryl-CoA hydrolase [EC:3.1.2.4] | (RefSeq) LOW QUALITY PROTEIN: 3-hydroxyisobutyryl-CoA hydrolase-like protein 1, mitochondrial	[I]	Lipid transport and metabolism	Enoyl-CoA hydratase/isomerase;; Enoyl-CoA hydratase/isomerase;; Elongation factor G C-terminus;; Elongation factor G, domain IV;; Enoyl-CoA hydratase/isomerase;; Enoyl-CoA hydratase/isomerase	3-hydroxyisobutyryl-CoA hydrolase-like protein 1, mitochondrial OS=Arabidopsis thaliana OX=3702 GN=At3g60510 PE=1 SV=1	Uncharacterized protein OS=Prunus persica OX=3760 GN=PRUPE_2G134700 PE=3 SV=1	I	Lipid transport and metabolism	LOW QUALITY PROTEIN: 3-hydroxyisobutyryl-CoA hydrolase-like protein 1, mitochondrial [Ziziphus jujuba]
BMK_Unigene_141609	[R]	General function prediction only	Molecular Function: transferase activity, transferring acyl groups (GO:0016746);;	K01726|4.2e-111|zju:107418005|K01726 gamma-carbonic anhydrase [EC:4.2.1.-] | (RefSeq) gamma carbonic anhydrase-like 2, mitochondrial	--	--	Bacterial transferase hexapeptide (six repeats)	Gamma carbonic anhydrase-like 2, mitochondrial OS=Arabidopsis thaliana OX=3702 GN=GAMMACAL2 PE=1 SV=1	UDP-3-O-[3-hydroxymyristoyl] glucosamine N-acyltransferase LpxD OS=Trema orientale OX=63057 GN=TorRG33x02_085800 PE=4 SV=1	S	Function unknown	gamma carbonic anhydrase-like 2, mitochondrial [Ziziphus jujuba]
BMK_Unigene_156376	--	--	Molecular Function: RNA binding (GO:0003723);;	K18757|0.0e+00|zju:107410427|K18757 la-related protein 1 | (RefSeq) la-related protein 1A	[OJ]	--	La domain;; Membrane transport protein	La-related protein 1A OS=Arabidopsis thaliana OX=3702 GN=LARP1A PE=1 SV=1	Transcriptional repressor poly-beta-hydroxybutyrate-responsive OS=Trema orientale OX=63057 GN=TorRG33x02_027830 PE=4 SV=1	--	--	la-related protein 1A [Ziziphus jujuba]
BMK_Unigene_059506	[O]	Posttranslational modification, protein turnover, chaperones	Biological Process: response to reactive oxygen species (GO:0000302);; Cellular Component: cellular_component (GO:0005575);; Cellular Component: intracellular (GO:0005622);; Cellular Component: obsolete cell (GO:0005623);; Cellular Component: cytoplasm (GO:0005737);; Biological Process: response to stress (GO:0006950);; Biological Process: response to oxidative stress (GO:0006979);; Biological Pr…	K13993|3.0e-88|zju:107413803|K13993 HSP20 family protein | (RefSeq) 18.1 kDa class I heat shock protein-like	[O]	Posttranslational modification, protein turnover, chaperones	Hsp20/alpha crystallin family;; HSP20-like domain found in ArsA	17.4 kDa class I heat shock protein OS=Oryza sativa subsp. japonica OX=39947 GN=HSP17.4 PE=2 SV=2	Putative 17.class I heat shock protein-like (Fragment) OS=Davidia involucrata OX=16924 GN=Din_005661 PE=3 SV=1	O	Posttranslational modification, protein turnover, chaperones	18.1 kDa class I heat shock protein-like [Ziziphus jujuba]
BMK_Unigene_083324	--	--	--	--	--	--	--	--	Guanine nucleotide-binding protein, beta subunit OS=Trema orientale OX=63057 GN=TorRG33x02_211410 PE=4 SV=1	S	Function unknown	uncharacterized protein LOC107421657 [Ziziphus jujuba]
BMK_Unigene_018128	--	--	Cellular Component: integral component of membrane (GO:0016021);; Biological Process: sterol metabolic process (GO:0016125);; Molecular Function: cholestenol delta-isomerase activity (GO:0047750);;	K01824|7.1e-23|cre:CHLREDRAFT_160258|K01824 cholestenol Delta-isomerase [EC:5.3.3.5] | (RefSeq) CDI1; C-8,7 sterol isomerase	[I]	Lipid transport and metabolism	EXPERA (EXPanded EBP superfamily)	Probable 3-beta-hydroxysteroid-Delta(8),Delta(7)-isomerase OS=Arabidopsis thaliana OX=3702 GN=At1g20050 PE=2 SV=1	Sterol isomerase OS=Klebsormidium nitens OX=105231 GN=KFL_001040050 PE=3 SV=1	I	Lipid transport and metabolism	uncharacterized protein MYCGRDRAFT_36488 [Zymoseptoria tritici IPO323]
BMK_Unigene_153515	[T]	Signal transduction mechanisms	Biological Process: phosphorelay signal transduction system (GO:0000160);; Molecular Function: DNA binding (GO:0003677);; Molecular Function: DNA-binding transcription factor activity (GO:0003700);; Cellular Component: nucleus (GO:0005634);;	K14491|1.8e-109|pper:18789818|K14491 two-component response regulator ARR-B family | (RefSeq) two-component response regulator ARR11	[K]	Transcription	Response regulator receiver domain	Two-component response regulator ORR26 OS=Oryza sativa subsp. japonica OX=39947 GN=RR26 PE=3 SV=2	Two-component response regulator OS=Trema orientale OX=63057 GN=TorRR11 PE=4 SV=1	K	Transcription	two-component response regulator ARR11 [Ziziphus jujuba]
BMK_Unigene_098031	[R]	General function prediction only	Cellular Component: membrane (GO:0016020);;	K03453|4.0e-11|smo:SELMODRAFT_45175|K03453 bile acid:Na+ symporter, BASS family | (RefSeq) hypothetical protein	[P]	Inorganic ion transport and metabolism	Sodium Bile acid symporter family	Probable sodium/metabolite cotransporter BASS1, chloroplastic OS=Arabidopsis thaliana OX=3702 GN=BASS1 PE=2 SV=1	Uncharacterized protein OS=Oryza meyeriana var. granulata OX=110450 GN=E2562_014260 PE=4 SV=1	P	Inorganic ion transport and metabolism	hypothetical protein B456_012G169500 [Gossypium raimondii]
BMK_Unigene_143764	[VI]	--	Molecular Function: glutathione peroxidase activity (GO:0004602);; Biological Process: response to oxidative stress (GO:0006979);; Cellular Component: integral component of membrane (GO:0016021);;	K00432|1.4e-113|zju:107430547|K00432 glutathione peroxidase [EC:1.11.1.9] | (RefSeq) probable phospholipid hydroperoxide glutathione peroxidase	[O]	Posttranslational modification, protein turnover, chaperones	Glutathione peroxidase;; AhpC/TSA family;; Redoxin	Probable glutathione peroxidase 3, mitochondrial OS=Arabidopsis thaliana OX=3702 GN=GPX3 PE=1 SV=1	Glutathione peroxidase OS=Ceanothus thyrsiflorus OX=48245 PE=2 SV=1	O	Posttranslational modification, protein turnover, chaperones	probable phospholipid hydroperoxide glutathione peroxidase [Ziziphus jujuba]
BMK_Unigene_137352	--	--	Molecular Function: protein transmembrane transporter activity (GO:0008320);; Molecular Function: P-P-bond-hydrolysis-driven protein transmembrane transporter activity (GO:0015450);; Cellular Component: integral component of membrane (GO:0016021);; Biological Process: posttranslational protein targeting to membrane, translocation (GO:0031204);; Cellular Component: Ssh1 translocon complex (GO:0071…	K07342|1.7e-30|pper:18784392|K07342 protein transport protein SEC61 subunit gamma and related proteins | (RefSeq) uncharacterized protein LOC18784392	[U]	Intracellular trafficking, secretion, and vesicular transport	SecE/Sec61-gamma subunits of protein translocation complex	Protein transport protein Sec61 subunit gamma OS=Oryza sativa subsp. japonica OX=39947 GN=Os02g0178400 PE=3 SV=1	Uncharacterized protein OS=Prunus persica OX=3760 GN=PRUPE_3G307000 PE=3 SV=1	U	Intracellular trafficking, secretion, and vesicular transport	uncharacterized protein LOC18784392 [Prunus persica]
BMK_Unigene_151926	--	--	Cellular Component: integral component of membrane (GO:0016021);;	--	--	--	Nodulin-like;; Major Facilitator Superfamily	--	Nodulin-like domain-containing protein OS=Prunus yedoensis var. nudiflora OX=2094558 GN=Pyn_40864 PE=4 SV=1	S	Function unknown	uncharacterized protein LOC107413223 [Ziziphus jujuba]
BMK_Unigene_147544	--	--	Molecular Function: aspartic-type endopeptidase activity (GO:0004190);; Biological Process: proteolysis (GO:0006508);; Biological Process: lipid metabolic process (GO:0006629);; Biological Process: protein catabolic process (GO:0030163);;	K08245|1.2e-174|zju:107433313|K08245 phytepsin [EC:3.4.23.40] | (RefSeq) aspartic proteinase-like	[O]	Posttranslational modification, protein turnover, chaperones	Eukaryotic aspartyl protease;; Xylanase inhibitor N-terminal;; Eukaryotic aspartyl protease	Aspartic proteinase A2 OS=Arabidopsis thaliana OX=3702 GN=APA2 PE=2 SV=1	Uncharacterized protein OS=Prunus persica OX=3760 GN=PRUPE_1G103000 PE=3 SV=1	O	Posttranslational modification, protein turnover, chaperones	aspartic proteinase-like [Ziziphus jujuba]
BMK_Unigene_155814	--	--	Biological Process: transcription elongation from RNA polymerase II promoter (GO:0006368);; Biological Process: histone modification (GO:0016570);; Cellular Component: Cdc73/Paf1 complex (GO:0016593);;	K15174|1.5e-308|zju:107435320|K15174 RNA polymerase II-associated factor 1 | (RefSeq) protein PAF1 homolog	[K]	Transcription	Paf1	Protein PAF1 homolog OS=Arabidopsis thaliana OX=3702 GN=VIP2 PE=1 SV=1	RNA polymerase II associated factor Paf OS=Trema orientale OX=63057 GN=TorRG33x02_156150 PE=3 SV=1	K	Transcription	protein PAF1 homolog [Ziziphus jujuba]
BMK_Unigene_149916	[H]	Coenzyme transport and metabolism	Biological Process: isoprenoid biosynthetic process (GO:0008299);; Molecular Function: transferase activity (GO:0016740);;	K13789|3.5e-198|zju:107424859|K13789 geranylgeranyl diphosphate synthase, type II [EC:2.5.1.1 2.5.1.10 2.5.1.29] | (RefSeq) geranylgeranyl pyrophosphate synthase, chloroplastic-like	[H]	Coenzyme transport and metabolism	Polyprenyl synthetase	Geranylgeranyl pyrophosphate synthase, chloroplastic OS=Hevea brasiliensis OX=3981 GN=GGPS PE=1 SV=1	Geranylgeranyl pyrophosphate synthase OS=Elaeagnus umbellata OX=43233 GN=GGPPS PE=2 SV=1	H	Coenzyme transport and metabolism	geranylgeranyl pyrophosphate synthase, chloroplastic-like [Ziziphus jujuba]
BMK_Unigene_073798	--	--	Cellular Component: integral component of membrane (GO:0016021);;	K14209|2.9e-209|zju:107427173|K14209 solute carrier family 36 (proton-coupled amino acid transporter) | (RefSeq) amino acid transporter AVT3B	[E]	Amino acid transport and metabolism	Transmembrane amino acid transporter protein	Amino acid transporter AVT3B OS=Arabidopsis thaliana OX=3702 GN=AVT3B PE=2 SV=1	amino acid transporter ANTL1-like OS=Juglans regia OX=51240 GN=LOC109006656 PE=3 SV=1	E	Amino acid transport and metabolism	amino acid transporter AVT3B, partial [Ziziphus jujuba]
BMK_Unigene_152845	--	--	Cellular Component: integral component of membrane (GO:0016021);;	--	[S]	Function unknown	Cytochrome B561, N terminal;; Cytochrome B561, N terminal	--	Uncharacterized protein OS=Morus notabilis OX=981085 GN=L484_014403 PE=4 SV=1	S	Function unknown	transmembrane protein 209 [Ziziphus jujuba]
BMK_Unigene_078185	[R]	General function prediction only	Molecular Function: molecular_function (GO:0003674);; Molecular Function: catalytic activity (GO:0003824);; Cellular Component: cellular_component (GO:0005575);; Cellular Component: intracellular (GO:0005622);; Cellular Component: obsolete cell (GO:0005623);; Cellular Component: cytoplasm (GO:0005737);; Cellular Component: cytosol (GO:0005829);; Biological Process: carbohydrate metabolic process …	K17744|8.3e-179|zju:107427462|K17744 L-galactose dehydrogenase [EC:1.1.1.316] | (RefSeq) L-galactose dehydrogenase	[C]	Energy production and conversion	Aldo/keto reductase family	L-galactose dehydrogenase OS=Arabidopsis thaliana OX=3702 GN=LGALDH PE=1 SV=1	Aldo/keto reductase/potassium channel subunit beta OS=Parasponia andersonii OX=3476 GN=PanWU01x14_190520 PE=4 SV=1	C	Energy production and conversion	L-galactose dehydrogenase [Ziziphus jujuba]
BMK_Unigene_133003	[J]	Translation, ribosomal structure and biogenesis	Molecular Function: translation initiation factor activity (GO:0003743);;	K03237|2.1e-91|qsu:112004229|K03237 translation initiation factor 2 subunit 1 | (RefSeq) eukaryotic translation initiation factor 2 subunit alpha-like	[J]	Translation, ribosomal structure and biogenesis	Eukaryotic translation initiation factor 2 alpha subunit;; S1 RNA binding domain	Eukaryotic translation initiation factor 2 subunit alpha homolog OS=Arabidopsis thaliana OX=3702 GN=At2g40290 PE=1 SV=2	Eukaryotic translation initiation factor 2 subunit alpha OS=Anthurium amnicola OX=1678845 GN=tif211_4 PE=3 SV=1	J	Translation, ribosomal structure and biogenesis	hypothetical protein M407DRAFT_246034 [Tulasnella calospora MUT 4182]
BMK_Unigene_153776	--	--	Biological Process: protein N-linked glycosylation (GO:0006487);; Cellular Component: oligosaccharyltransferase complex (GO:0008250);; Cellular Component: integral component of membrane (GO:0016021);;	K12667|0.0e+00|zju:107425765|K12667 oligosaccharyltransferase complex subunit delta (ribophorin II) | (RefSeq) dolichyl-diphosphooligosaccharide--protein glycosyltransferase subunit 2 isoform X1	[O]	Posttranslational modification, protein turnover, chaperones	Oligosaccharyltransferase subunit Ribophorin II;; Oligosaccharyltransferase subunit Ribophorin II	Dolichyl-diphosphooligosaccharide--protein glycosyltransferase subunit 2 OS=Arabidopsis thaliana OX=3702 GN=RPN2 PE=1 SV=1	Dolichyl-diphosphooligosaccharide--protein glycosyltransferase subunit 2 OS=Carpinus fangiana OX=176857 GN=FH972_013046 PE=3 SV=1	O	Posttranslational modification, protein turnover, chaperones	dolichyl-diphosphooligosaccharide--protein glycosyltransferase subunit 2 isoform X2 [Ziziphus jujuba]
BMK_Unigene_076774	[H]	Coenzyme transport and metabolism	Molecular Function: hydroxyethylthiazole kinase activity (GO:0004417);; Biological Process: thiamine salvage (GO:0036172);;	K00878|1.4e-152|zju:107422606|K00878 hydroxyethylthiazole kinase [EC:2.7.1.50] | (RefSeq) hydroxyethylthiazole kinase	--	--	Hydroxyethylthiazole kinase family;; Phosphomethylpyrimidine kinase	Hydroxyethylthiazole kinase OS=Arabidopsis thaliana OX=3702 GN=THIM PE=1 SV=1	4-methyl-5-beta-hydroxyethylthiazole kinase OS=Prunus persica OX=3760 GN=PRUPE_1G056900 PE=3 SV=1	H	Coenzyme transport and metabolism	hydroxyethylthiazole kinase [Ziziphus jujuba]
BMK_Unigene_150919	[E]	Amino acid transport and metabolism	Biological Process: arginine metabolic process (GO:0006525);; Molecular Function: transaminase activity (GO:0008483);; Molecular Function: pyridoxal phosphate binding (GO:0030170);;	K00818|1.5e-259|zju:107418063|K00818 acetylornithine aminotransferase [EC:2.6.1.11] | (RefSeq) acetylornithine aminotransferase, mitochondrial	[E]	Amino acid transport and metabolism	Aminotransferase class-III	Acetylornithine aminotransferase, mitochondrial OS=Alnus glutinosa OX=3517 GN=AG118 PE=2 SV=1	Acetylornithine transaminase OS=Ceanothus thyrsiflorus OX=48245 PE=2 SV=1	E	Amino acid transport and metabolism	acetylornithine aminotransferase, mitochondrial [Ziziphus jujuba]
BMK_Unigene_151655	--	--	Biological Process: regulation of DNA endoreduplication (GO:0032875);;	--	--	--	--	Cyclin-dependent protein kinase inhibitor SMR3 OS=Arabidopsis thaliana OX=3702 GN=SMR3 PE=1 SV=1	Uncharacterized protein OS=Manihot esculenta OX=3983 GN=MANES_11G131200 PE=4 SV=1	--	--	cyclin-dependent protein kinase inhibitor SMR10 [Ziziphus jujuba]
BMK_Unigene_077451	[HR]	--	Cellular Component: integral component of membrane (GO:0016021);;	--	[R]	General function prediction only	alpha/beta hydrolase fold;; Alpha/beta hydrolase family;; Serine aminopeptidase, S33	--	AB hydrolase-1 domain-containing protein OS=Prunus persica OX=3760 GN=PRUPE_3G040000 PE=4 SV=1	S	Function unknown	uncharacterized protein LOC107435914 [Ziziphus jujuba]
BMK_Unigene_134208	--	--	Molecular Function: ATP binding (GO:0005524);; Molecular Function: transferase activity (GO:0016740);;	K06688|1.1e-102|zju:107410867|K06688 ubiquitin-conjugating enzyme E2 C [EC:2.3.2.23] | (RefSeq) ubiquitin-conjugating enzyme E2 20	[O]	Posttranslational modification, protein turnover, chaperones	Ubiquitin-conjugating enzyme	Ubiquitin-conjugating enzyme E2 20 OS=Arabidopsis thaliana OX=3702 GN=UBC20 PE=2 SV=1	ubiquitin-conjugating enzyme E2 20-like OS=Juglans regia OX=51240 GN=LOC108994600 PE=3 SV=1	O	Posttranslational modification, protein turnover, chaperones	ubiquitin-conjugating enzyme E2 20 [Ziziphus jujuba]
BMK_Unigene_145645	--	--	Molecular Function: double-stranded DNA binding (GO:0003690);; Molecular Function: single-stranded DNA binding (GO:0003697);; Cellular Component: nucleus (GO:0005634);; Biological Process: DNA replication initiation (GO:0006270);;	K10736|1.2e-229|zju:107427508|K10736 minichromosome maintenance protein 10 | (RefSeq) protein MCM10 homolog	[D]	Cell cycle control, cell division, chromosome partitioning	Primase zinc finger	--	Zinc finger, Mcm10/DnaG-type OS=Trema orientale OX=63057 GN=TorRG33x02_142750 PE=3 SV=1	D	Cell cycle control, cell division, chromosome partitioning	protein MCM10 homolog [Ziziphus jujuba]
BMK_Unigene_112971	--	--	Molecular Function: molecular_function (GO:0003674);; Molecular Function: RNA helicase activity (GO:0003724);; Molecular Function: catalytic activity (GO:0003824);; Molecular Function: RNA helicase activity (GO:0004004);; Molecular Function: helicase activity (GO:0004386);; Molecular Function: protein kinase activity (GO:0004672);; Molecular Function: protein serine/threonine kinase activity (GO:…	--	--	--	--	--	--	A	RNA processing and modification	--
BMK_Unigene_071919	--	--	--	--	--	--	--	--	--	--	--	transcription factor bHLH62-like isoform X1 [Ziziphus jujuba]
BMK_Unigene_144291	--	--	Biological Process: reproduction (GO:0000003);; Cellular Component: ubiquitin ligase complex (GO:0000151);; Biological Process: response to acid chemical (GO:0001101);; Biological Process: activation of innate immune response (GO:0002218);; Biological Process: immune effector process (GO:0002252);; Biological Process: activation of immune response (GO:0002253);; Biological Process: immune system …	K14508|5.8e-131|zju:107433767|K14508 regulatory protein NPR1 | (RefSeq) regulatory protein NPR5-like isoform X1	[R]	General function prediction only	ZF-HD protein dimerisation region;; BTB/POZ domain;; Domain of unknown function (DUF3420)	BTB/POZ domain and ankyrin repeat-containing protein NOOT1 OS=Medicago truncatula OX=3880 GN=NOOT1 PE=2 SV=1	Regulatory protein NPR5 OS=Prunus yedoensis var. nudiflora OX=2094558 GN=Pyn_06475 PE=4 SV=1	S	Function unknown	regulatory protein NPR5-like isoform X1 [Ziziphus jujuba]
BMK_Unigene_144041	[Q]	Secondary metabolites biosynthesis, transport and catabolism	Molecular Function: metal ion binding (GO:0046872);; Molecular Function: dioxygenase activity (GO:0051213);;	K24028|2.4e-55|cam:101505284|K24028 salicylic acid 3-hydroxylase [EC:1.14.11.-] | (RefSeq) 1-aminocyclopropane-1-carboxylate oxidase-like	[QR]	--	non-haem dioxygenase in morphine synthesis N-terminal;; 2OG-Fe(II) oxygenase superfamily	Probable 2-oxoglutarate-dependent dioxygenase At5g05600 OS=Arabidopsis thaliana OX=3702 GN=At5g05600 PE=2 SV=1	Putative oxoglutarate/iron-dependent dioxygenase, non-heme dioxygenase domain-containing protein OS=Rosa chinensis OX=74649 GN=RchiOBHm_Chr6g0259531 PE=3 SV=1	Q	Secondary metabolites biosynthesis, transport and catabolism	probable 2-oxoglutarate-dependent dioxygenase At5g05600 isoform X1 [Ziziphus jujuba]
BMK_Unigene_129256	--	--	Molecular Function: serine-type endopeptidase inhibitor activity (GO:0004867);; Biological Process: response to wounding (GO:0009611);;	--	--	--	Potato inhibitor I family	Subtilisin-chymotrypsin inhibitor-2A OS=Hordeum vulgare OX=4513 PE=1 SV=2	Subtilisin-chymotrypsin inhibitor WSCI OS=Capsicum chinense OX=80379 GN=BC332_16572 PE=3 SV=1	E	Amino acid transport and metabolism	Subtilisin-chymotrypsin inhibitor WSCI [Capsicum chinense]
BMK_Unigene_145190	--	--	--	K23978|3.9e-94|zju:107430847|K23978 isoamyl acetate esterase [EC:3.1.1.112] | (RefSeq) GDSL esterase/lipase CPRD49-like	[I]	Lipid transport and metabolism	GDSL-like Lipase/Acylhydrolase family;; GDSL-like Lipase/Acylhydrolase	GDSL esterase/lipase CPRD49 OS=Arabidopsis thaliana OX=3702 GN=CPRD49 PE=2 SV=1	SGNH_hydro domain-containing protein OS=Vitis vinifera OX=29760 GN=VIT_08s0007g02260 PE=4 SV=1	I	Lipid transport and metabolism	GDSL esterase/lipase CPRD49-like [Ziziphus jujuba]
BMK_Unigene_149996	--	--	Cellular Component: integral component of membrane (GO:0016021);; Molecular Function: transmembrane transporter activity (GO:0022857);;	K14638|5.3e-106|cmax:111493070|K14638 solute carrier family 15 (peptide/histidine transporter), member 3/4 | (RefSeq) protein NRT1/ PTR FAMILY 2.13-like	[E]	Amino acid transport and metabolism	POT family;; POT family	Protein NRT1/ PTR FAMILY 2.13 OS=Arabidopsis thaliana OX=3702 GN=NPF2.13 PE=1 SV=1	Protein NRT1/ PTR FAMILY 2.13 OS=Mucuna pruriens OX=157652 GN=NPF2.13 PE=3 SV=1	E	Amino acid transport and metabolism	protein NRT1/ PTR FAMILY 2.13-like [Ziziphus jujuba]
BMK_Unigene_084018	[R]	General function prediction only	Cellular Component: cellular_component (GO:0005575);; Cellular Component: obsolete cell (GO:0005623);; Cellular Component: plasma membrane (GO:0005886);; Biological Process: response to stress (GO:0006950);; Biological Process: defense response (GO:0006952);; Biological Process: cell communication (GO:0007154);; Biological Process: signal transduction (GO:0007165);; Biological Process: biological…	K13459|8.3e-118|vvi:104880791|K13459 disease resistance protein RPS2 | (RefSeq) probable disease resistance protein At4g27220	[T]	Signal transduction mechanisms	NB-ARC domain	Disease resistance protein At4g27190 OS=Arabidopsis thaliana OX=3702 GN=At4g27190 PE=2 SV=1	NB-ARC domain containing protein (Fragment) OS=Parasponia andersonii OX=3476 GN=PanWU01x14_322360 PE=4 SV=1	T	Signal transduction mechanisms	probable disease resistance protein At4g27220, partial [Ziziphus jujuba]
BMK_Unigene_072327	--	--	Biological Process: protein glycosylation (GO:0006486);; Molecular Function: xylogalacturonan beta-1,3-xylosyltransferase activity (GO:0102983);;	K18789|3.7e-147|mdm:103434260|K18789 xylogalacturonan beta-1,3-xylosyltransferase [EC:2.4.2.41] | (RefSeq) probable glycosyltransferase At5g20260 isoform X1	[GMW]	--	Exostosin family	Probable glycosyltransferase At5g20260 OS=Arabidopsis thaliana OX=3702 GN=At5g20260 PE=3 SV=3	Putative xylogalacturonan beta-1,3-xylosyltransferase OS=Rosa chinensis OX=74649 GN=RchiOBHm_Chr3g0448141 PE=3 SV=1	--	--	probable glycosyltransferase At5g20260 [Ziziphus jujuba]
BMK_Unigene_156292	--	--	--	K03257|1.8e-11|nta:107761684|K03257 translation initiation factor 4A | (RefSeq) eukaryotic initiation factor 4A-9-like	--	--	--	Protein FLX-like 1 OS=Arabidopsis thaliana OX=3702 GN=FLXL1 PE=1 SV=1	Uncharacterized protein OS=Fagus sylvatica OX=28930 GN=FSB_LOCUS11727 PE=3 SV=1	S	Function unknown	protein FLX-like 1 [Ziziphus jujuba]
BMK_Unigene_082135	[C]	Energy production and conversion	Molecular Function: D-arabinono-1,4-lactone oxidase activity (GO:0003885);; Cellular Component: integral component of membrane (GO:0016021);; Molecular Function: galactonolactone dehydrogenase activity (GO:0016633);; Molecular Function: FAD binding (GO:0071949);;	K00225|0.0e+00|zju:107431670|K00225 L-galactono-1,4-lactone dehydrogenase [EC:1.3.2.3] | (RefSeq) L-galactono-1,4-lactone dehydrogenase, mitochondrial-like	[V]	Defense mechanisms	FAD binding domain;; D-arabinono-1,4-lactone oxidase	L-galactono-1,4-lactone dehydrogenase, mitochondrial OS=Arabidopsis thaliana OX=3702 GN=GLDH PE=1 SV=1	Galactonolactone dehydrogenase OS=Trema orientale OX=63057 GN=TorRG33x02_264710 PE=4 SV=1	V	Defense mechanisms	L-galactono-1,4-lactone dehydrogenase, mitochondrial-like [Ziziphus jujuba]
BMK_Unigene_150741	[QV]	--	Molecular Function: monooxygenase activity (GO:0004497);; Molecular Function: iron ion binding (GO:0005506);; Cellular Component: integral component of membrane (GO:0016021);; Molecular Function: oxidoreductase activity, acting on paired donors, with incorporation or reduction of molecular oxygen (GO:0016705);; Molecular Function: heme binding (GO:0020037);;	K20619|8.8e-300|zju:107425481|K20619 cytochrome P450 family 78 subfamily A | (RefSeq) cytochrome P450 78A7-like	[Q]	Secondary metabolites biosynthesis, transport and catabolism	Cytochrome P450	Cytochrome P450 78A7 OS=Arabidopsis thaliana OX=3702 GN=CYP78A7 PE=2 SV=1	Uncharacterized protein OS=Fagus sylvatica OX=28930 GN=FSB_LOCUS7386 PE=3 SV=1	Q	Secondary metabolites biosynthesis, transport and catabolism	cytochrome P450 78A7-like [Ziziphus jujuba]
BMK_Unigene_139654	--	--	Biological Process: reproduction (GO:0000003);; Biological Process: microtubule cytoskeleton organization (GO:0000226);; Biological Process: developmental process involved in reproduction (GO:0003006);; Molecular Function: molecular_function (GO:0003674);; Molecular Function: transporter activity (GO:0005215);; Molecular Function: lipid transporter activity (GO:0005319);; Molecular Function: phos…	K02433|9.7e-55|apro:F751_6020|K02433 aspartyl-tRNA(Asn)/glutamyl-tRNA(Gln) amidotransferase subunit A [EC:6.3.5.6 6.3.5.7] | (RefSeq) Glutamyl-tRNA(Gln) amidotransferase subunit A	[I]	Lipid transport and metabolism	CRAL/TRIO domain;; CRAL/TRIO, N-terminal domain;; Divergent CRAL/TRIO domain	Phosphatidylinositol/phosphatidylcholine transfer protein SFH3 OS=Arabidopsis thaliana OX=3702 GN=SFH3 PE=2 SV=1	CRAL-TRIO domain-containing protein OS=Prunus dulcis OX=3755 GN=ALMOND_2B006251 PE=4 SV=1	I	Lipid transport and metabolism	phosphatidylinositol/phosphatidylcholine transfer protein SFH3, partial [Ziziphus jujuba]
BMK_Unigene_078353	--	--	Molecular Function: molecular_function (GO:0003674);; Molecular Function: nucleic acid binding (GO:0003676);; Molecular Function: RNA binding (GO:0003723);; Molecular Function: catalytic activity (GO:0003824);; Molecular Function: nuclease activity (GO:0004518);; Molecular Function: endonuclease activity (GO:0004519);; Molecular Function: binding (GO:0005488);; Cellular Component: cellular_compon…	--	[R]	General function prediction only	PPR repeat family;; PPR repeat;; PPR repeat;; Pentatricopeptide repeat domain;; Pentacotripeptide-repeat region of PRORP;; Evolutionarily conserved signalling intermediate in Toll pathway	Putative pentatricopeptide repeat-containing protein At1g02420 OS=Arabidopsis thaliana OX=3702 GN=At1g02420 PE=3 SV=2	Putative pentatricopeptide repeat-containing protein OS=Prunus yedoensis var. nudiflora OX=2094558 GN=Pyn_11097 PE=4 SV=1	S	Function unknown	hypothetical protein FNV43_RR23669 [Rhamnella rubrinervis]
BMK_Unigene_084080	--	--	--	--	--	--	--	--	--	--	--	uncharacterized protein LOC107415516 [Ziziphus jujuba]
BMK_Unigene_149235	--	--	Biological Process: developmental process (GO:0032502);;	--	--	--	Plant protein 1589 of unknown function (A_thal_3526)	--	Uncharacterized protein OS=Prunus persica OX=3760 GN=PRUPE_2G227200 PE=4 SV=1	S	Function unknown	uncharacterized protein LOC107404085 [Ziziphus jujuba]
BMK_Unigene_150834	[G]	Carbohydrate transport and metabolism	Cellular Component: integral component of membrane (GO:0016021);; Molecular Function: transmembrane transporter activity (GO:0022857);;	--	[R]	General function prediction only	Major Facilitator Superfamily;; Sugar (and other) transporter	--	hippocampus abundant transcript-like protein 1 isoform X2 OS=Juglans regia OX=51240 GN=LOC108981011 PE=4 SV=1	S	Function unknown	uncharacterized protein LOC107422431 isoform X1 [Ziziphus jujuba]
BMK_Unigene_001300	[QV]	--	Molecular Function: monooxygenase activity (GO:0004497);; Molecular Function: iron ion binding (GO:0005506);; Cellular Component: integral component of membrane (GO:0016021);; Molecular Function: oxidoreductase activity, acting on paired donors, with incorporation or reduction of molecular oxygen (GO:0016705);; Molecular Function: heme binding (GO:0020037);;	K20667|5.0e-177|zju:107421655|K20667 beta-amyrin 28-monooxygenase [EC:1.14.14.126] | (RefSeq) beta-amyrin 28-oxidase-like	[QI]	--	Cytochrome P450	Beta-amyrin 28-monooxygenase OS=Vitis vinifera OX=29760 GN=CYP716A15 PE=1 SV=1	Uncharacterized protein OS=Camellia sinensis var. sinensis OX=542762 GN=TEA_016610 PE=3 SV=1	--	--	beta-amyrin 28-oxidase-like [Ziziphus jujuba]
BMK_Unigene_154966	--	--	Biological Process: cellulose microfibril organization (GO:0010215);; Cellular Component: integral component of membrane (GO:0016021);; Cellular Component: anchored component of membrane (GO:0031225);;	--	--	--	COBRA-like protein;; COBRA-like protein	Protein COBRA OS=Arabidopsis thaliana OX=3702 GN=COB PE=2 SV=1	COBRA-like protein OS=Juglans regia OX=51240 GN=LOC108994204 PE=3 SV=1	S	Function unknown	COBRA-like protein 4 [Ziziphus jujuba]
BMK_Unigene_065091	--	--	Molecular Function: ATP binding (GO:0005524);; Cellular Component: endoplasmic reticulum (GO:0005783);; Molecular Function: ATPase activity (GO:0016887);;	--	[S]	Function unknown	Ribosome associated membrane protein RAMP4	--	ABC transporter F family member 4 OS=Cucumis melo var. makuwa OX=1194695 GN=E5676_scaffold266G001290 PE=3 SV=1	U	Intracellular trafficking, secretion, and vesicular transport	ABC transporter F family member 4 [Cucumis melo var. makuwa]
BMK_Unigene_076797	--	--	--	K20535|6.5e-08|nta:107797610|K20535 mitogen-activated protein kinase 1/2 [EC:2.7.11.24] | (RefSeq) mitogen-activated protein kinase KSS1-like	--	--	Myb/SANT-like DNA-binding domain	--	Myb_DNA-bind_3 domain-containing protein OS=Acer yangbiense OX=1000413 GN=EZV62_023122 PE=4 SV=1	S	Function unknown	uncharacterized protein LOC107429887 isoform X2 [Ziziphus jujuba]
BMK_Unigene_116865	--	--	--	K09534|1.8e-07|zju:107404801|K09534 DnaJ homolog subfamily C member 14 | (RefSeq) uncharacterized protein LOC107404801	--	--	--	--	--	--	--	uncharacterized protein LOC107404801 [Ziziphus jujuba]
BMK_Unigene_151574	--	--	Molecular Function: methyltransferase activity (GO:0008168);; Biological Process: methylation (GO:0032259);;	--	[R]	General function prediction only	--	Protein SET DOMAIN GROUP 40 OS=Arabidopsis thaliana OX=3702 GN=SDG40 PE=2 SV=1	N-lysine methyltransferase SETD OS=Trema orientale OX=63057 GN=TorRG33x02_151510 PE=4 SV=1	S	Function unknown	protein SET DOMAIN GROUP 40-like isoform X1 [Ziziphus jujuba]
BMK_Unigene_148930	--	--	Molecular Function: AT DNA binding (GO:0003680);; Molecular Function: DNA-binding transcription factor activity (GO:0003700);; Cellular Component: nucleus (GO:0005634);;	--	--	--	Plants and Prokaryotes Conserved (PCC) domain	AT-hook motif nuclear-localized protein 20 OS=Arabidopsis thaliana OX=3702 GN=AHL20 PE=2 SV=1	AT-hook motif nuclear-localized protein OS=Punica granatum OX=22663 GN=CDL15_Pgr000745 PE=4 SV=1	K	Transcription	AT-hook motif nuclear-localized protein 20-like [Ziziphus jujuba]
BMK_Unigene_141728	--	--	Molecular Function: protein kinase activity (GO:0004672);; Molecular Function: ATP binding (GO:0005524);; Cellular Component: integral component of membrane (GO:0016021);;	K00103|2.7e-34|pop:112323644|K00103 L-gulonolactone oxidase [EC:1.1.3.8] | (RefSeq) probable L-gulonolactone oxidase 6	--	--	Wall-associated receptor kinase galacturonan-binding	--	Protein kinase domain-containing protein OS=Prunus persica OX=3760 GN=PRUPE_2G089000 PE=4 SV=1	T	Signal transduction mechanisms	rust resistance kinase Lr10-like isoform X1 [Ziziphus jujuba]
BMK_Unigene_072698	--	--	Molecular Function: molecular_function (GO:0003674);; Molecular Function: DNA-binding transcription factor activity (GO:0003700);; Biological Process: regulation of transcription, DNA-templated (GO:0006355);; Biological Process: biological_process (GO:0008150);; Biological Process: regulation of biosynthetic process (GO:0009889);; Biological Process: regulation of gene expression (GO:0010468);; B…	K09286|2.6e-18|bdi:112269970|K09286 EREBP-like factor | (RefSeq) ethylene-responsive transcription factor RAP2-11-like	--	--	AP2 domain	Ethylene-responsive transcription factor WIN1 OS=Arabidopsis thaliana OX=3702 GN=WIN1 PE=2 SV=1	Ethylene-responsive transcription factor WIN1 OS=Morella rubra OX=262757 GN=CJ030_MR7G012917 PE=4 SV=1	K	Transcription	ethylene-responsive transcription factor WIN1-like [Ziziphus jujuba]
BMK_Unigene_327937	[J]	Translation, ribosomal structure and biogenesis	Molecular Function: RNA binding (GO:0003723);; Molecular Function: structural constituent of ribosome (GO:0003735);; Biological Process: translation (GO:0006412);; Cellular Component: small ribosomal subunit (GO:0015935);;	K02969|3.7e-33|bna:106411618|K02969 small subunit ribosomal protein S20e | (RefSeq) 40S ribosomal protein S20-1	[J]	Translation, ribosomal structure and biogenesis	Ribosomal protein S10p/S20e	40S ribosomal protein S20 OS=Oryza sativa subsp. japonica OX=39947 GN=RPS20 PE=2 SV=2	Ribosomal_S10 domain-containing protein OS=Brassica campestris OX=3711 GN=BRAA02T06291Z PE=3 SV=1	J	Translation, ribosomal structure and biogenesis	40S ribosomal protein S20-1 [Brassica rapa]
BMK_Unigene_144203	--	--	Cellular Component: integral component of membrane (GO:0016021);; Molecular Function: metal ion binding (GO:0046872);; Biological Process: oxidation-reduction process (GO:0055114);;	K14173|4.4e-155|zju:107421480|K14173 alpha-farnesene synthase [EC:4.2.3.46] | (RefSeq) alpha-farnesene synthase-like	[T]	Signal transduction mechanisms	Terpene synthase, N-terminal domain;; Terpene synthase family, metal binding domain;; Eukaryotic cytochrome b561	Alpha-farnesene synthase OS=Ricinus communis OX=3988 GN=TPS7 PE=1 SV=2	Cytochrome b561 and DOMON domain-containing protein OS=Vitis vinifera OX=29760 GN=VvCHDh000793_0 PE=4 SV=1	T	Signal transduction mechanisms	alpha-farnesene synthase-like [Ziziphus jujuba]
BMK_Unigene_210033	--	--	Molecular Function: nucleic acid binding (GO:0003676);; Biological Process: regulation of transcription, DNA-templated (GO:0006355);;	--	[R]	General function prediction only	KRAB box	--	--	--	--	--
BMK_Unigene_079817	--	--	Cellular Component: integral component of membrane (GO:0016021);; Molecular Function: transferase activity, transferring glycosyl groups (GO:0016757);;	K08238|3.7e-223|zju:107419204|K08238 xyloglucan 6-xylosyltransferase [EC:2.4.2.39] | (RefSeq) probable xyloglucan 6-xylosyltransferase 5	[GM]	--	galactosyl transferase GMA12/MNN10 family	Xyloglucan 6-xylosyltransferase 2 OS=Arabidopsis thaliana OX=3702 GN=XXT2 PE=1 SV=1	Glycosyltransferase OS=Parasponia andersonii OX=3476 GN=PanWU01x14_092500 PE=3 SV=1	--	--	probable xyloglucan 6-xylosyltransferase 5 [Ziziphus jujuba]
BMK_Unigene_263219	--	--	Molecular Function: protein binding (GO:0005515);;	--	--	--	NHL repeat	--	--	--	--	--
BMK_Unigene_087602	--	--	Molecular Function: lipid binding (GO:0008289);;	--	[I]	Lipid transport and metabolism	START domain	--	--	--	--	--
BMK_Unigene_180523	--	--	--	--	--	--	--	--	Uncharacterized protein OS=Aphanomyces invadans OX=157072 GN=H310_05474 PE=4 SV=1	--	--	hypothetical protein H310_05474 [Aphanomyces invadans]
BMK_Unigene_082404	[P]	Inorganic ion transport and metabolism	Molecular Function: ATP binding (GO:0005524);; Molecular Function: ATPase activity (GO:0016887);;	K01551|1.3e-220|zju:107413716|K01551 arsenite/tail-anchored protein-transporting ATPase [EC:7.3.2.7 7.3.-.-] | (RefSeq) ATPase ARSA1-like	[P]	Inorganic ion transport and metabolism	Anion-transporting ATPase;; CobQ/CobB/MinD/ParA nucleotide binding domain;; NUBPL iron-transfer P-loop NTPase;; Pectinesterase;; Pectinesterase	ATPase GET3B OS=Arabidopsis thaliana OX=3702 GN=GET3B PE=1 SV=1	Arsenical pump ATPase OS=Trema orientale OX=63057 GN=TorRG33x02_263230 PE=4 SV=1	P	Inorganic ion transport and metabolism	ATPase ARSA1-like [Ziziphus jujuba]
BMK_Unigene_078694	[E]	Amino acid transport and metabolism	Biological Process: arginine catabolic process (GO:0006527);; Biological Process: spermidine biosynthetic process (GO:0008295);; Molecular Function: arginine decarboxylase activity (GO:0008792);;	K01583|0.0e+00|zju:107426702|K01583 arginine decarboxylase [EC:4.1.1.19] | (RefSeq) arginine decarboxylase	--	--	Pyridoxal-dependent decarboxylase, pyridoxal binding domain	Arginine decarboxylase OS=Pisum sativum OX=3888 PE=2 SV=1	Arginine decarboxylase OS=Trema orientale OX=63057 GN=TorRG33x02_043280 PE=3 SV=1	E	Amino acid transport and metabolism	arginine decarboxylase [Ziziphus jujuba]
BMK_Unigene_073971	[O]	Posttranslational modification, protein turnover, chaperones	Cellular Component: cytoplasm (GO:0005737);; Biological Process: glycerol ether metabolic process (GO:0006662);; Molecular Function: protein disulfide oxidoreductase activity (GO:0015035);; Molecular Function: oxidoreductase activity, acting on a sulfur group of donors, disulfide as acceptor (GO:0016671);; Biological Process: cell redox homeostasis (GO:0045454);; Molecular Function: protein-disul…	K03671|4.1e-10|ghi:107892347|K03671 thioredoxin 1 | (RefSeq) thioredoxin H2-like	[O]	Posttranslational modification, protein turnover, chaperones	Thioredoxin	Thioredoxin Y1, chloroplastic OS=Arabidopsis thaliana OX=3702 GN=At1g76760 PE=2 SV=1	Thioredoxin domain-containing protein OS=Vitis vinifera OX=29760 GN=VIT_18s0072g00400 PE=4 SV=1	O	Posttranslational modification, protein turnover, chaperones	thioredoxin Y1, chloroplastic [Ziziphus jujuba]
BMK_Unigene_136816	--	--	--	--	--	--	--	--	Uncharacterized protein OS=Ensete ventricosum OX=4639 GN=B296_00010572 PE=4 SV=1	S	Function unknown	hypothetical protein B296_00010572 [Ensete ventricosum]
BMK_Unigene_165843	[C]	Energy production and conversion	Molecular Function: oxidoreductase activity, acting on iron-sulfur proteins as donors (GO:0016730);; Molecular Function: metal ion binding (GO:0046872);; Molecular Function: 4 iron, 4 sulfur cluster binding (GO:0051539);; Molecular Function: ferredoxin-thioredoxin reductase activity (GO:0103012);;	K17892|1.3e-40|ath:AT2G04700|K17892 ferredoxin-thioredoxin reductase catalytic chain [EC:1.8.7.2] | (RefSeq) ferredoxin thioredoxin reductase catalytic beta chain family protein	--	--	Ferredoxin thioredoxin reductase catalytic beta chain	Ferredoxin-thioredoxin reductase catalytic chain, chloroplastic OS=Arabidopsis thaliana OX=3702 GN=FTRC PE=2 SV=1	Ferredoxin-thioredoxin reductase catalytic chain, chloroplastic OS=Arabidopsis thaliana OX=3702 GN=AXX17_At2g03850 PE=3 SV=1	C	Energy production and conversion	ferredoxin thioredoxin reductase catalytic beta chain family protein [Arabidopsis thaliana]
BMK_Unigene_164853	--	--	Cellular Component: mitochondrion (GO:0005739);; Cellular Component: chloroplast (GO:0009507);; Cellular Component: plastid (GO:0009536);; Cellular Component: chloroplast inner membrane (GO:0009706);; Cellular Component: chloroplast envelope (GO:0009941);; Biological Process: plant organ development (GO:0099402);;	--	--	--	Protein RETICULATA-related	--	AT5g24690/MXC17_8 OS=Arabidopsis thaliana OX=3702 GN=MXC17.8 PE=1 SV=1	S	Function unknown	hypothetical protein [Arabidopsis thaliana]
BMK_Unigene_163069	--	--	Molecular Function: ornithine decarboxylase inhibitor activity (GO:0008073);;	--	[E]	Amino acid transport and metabolism	Ornithine decarboxylase antizyme	--	--	--	--	--
BMK_Unigene_154014	[R]	General function prediction only	Molecular Function: GTP binding (GO:0005525);;	K03977|6.5e-85|mpp:MICPUCDRAFT_44721|K03977 GTPase | (RefSeq) hypothetical protein	[J]	Translation, ribosomal structure and biogenesis	50S ribosome-binding GTPase;; Ferrous iron transport protein B;; KH-domain-like of EngA bacterial GTPase enzymes, C-terminal;; 50S ribosome-binding GTPase;; Cellulose synthase	Cellulose synthase A catalytic subunit 7 [UDP-forming] OS=Oryza sativa subsp. japonica OX=39947 GN=CESA7 PE=2 SV=1	GTP-binding protein EngA OS=Juglans regia OX=51240 GN=LOC108998724 PE=3 SV=1	J	Translation, ribosomal structure and biogenesis	uncharacterized protein LOC107412607 isoform X1 [Ziziphus jujuba]
BMK_Unigene_145677	--	--	Molecular Function: molecular_function (GO:0003674);; Molecular Function: nucleic acid binding (GO:0003676);; Molecular Function: RNA binding (GO:0003723);; Molecular Function: catalytic activity (GO:0003824);; Molecular Function: nuclease activity (GO:0004518);; Molecular Function: endonuclease activity (GO:0004519);; Molecular Function: binding (GO:0005488);; Cellular Component: cellular_compon…	K01183|6.6e-13|cic:CICLE_v10021852mg|K01183 chitinase [EC:3.2.1.14] | (RefSeq) hypothetical protein	[R]	General function prediction only	PPR repeat family;; PPR repeat;; PPR repeat;; Pentatricopeptide repeat domain;; Pentacotripeptide-repeat region of PRORP;; PPR repeat family;; PPR repeat;; Pentatricopeptide repeat domain;; PPR repeat;; Pentacotripeptide-repeat region of PRORP	Pentatricopeptide repeat-containing protein At5g48730, chloroplastic OS=Arabidopsis thaliana OX=3702 GN=At5g48730 PE=2 SV=2	PPR domain-containing protein/PPR_2 domain-containing protein OS=Cephalotus follicularis OX=3775 GN=CFOL_v3_14198 PE=4 SV=1	S	Function unknown	pentatricopeptide repeat-containing protein At5g48730, chloroplastic [Ziziphus jujuba]
BMK_Unigene_213520	--	--	--	--	[A]	RNA processing and modification	--	--	--	--	--	putative RNA-binding protein Luc7-like 1 [Rhodamnia argentea]
BMK_Unigene_145014	--	--	--	--	--	--	Beta-lactamase	--	--	--	--	--
BMK_Unigene_094008	--	--	Cellular Component: membrane (GO:0016020);; Cellular Component: integral component of membrane (GO:0016021);; Biological Process: sterol biosynthetic process (GO:0016126);; Molecular Function: oxidoreductase activity, acting on the CH-CH group of donors, NAD or NADP as acceptor (GO:0016628);;	K00222|5.4e-20|apro:F751_2894|K00222 Delta14-sterol reductase [EC:1.3.1.70] | (RefSeq) Delta(14)-sterol reductase	[IT]	--	Ergosterol biosynthesis ERG4/ERG24 family;; Isoprenylcysteine carboxyl methyltransferase (ICMT) family;; 3-oxo-5-alpha-steroid 4-dehydrogenase;; Phospholipid methyltransferase;; Protein of unknown function (DUF1295)	--	Delta(14)-sterol reductase OS=Auxenochlorella protothecoides OX=3075 GN=APUTEX25_001219 PE=3 SV=1	--	--	Delta(14)-sterol reductase [Auxenochlorella protothecoides]
BMK_Unigene_149166	--	--	Cellular Component: integral component of membrane (GO:0016021);; Molecular Function: hydrolase activity, acting on ester bonds (GO:0016788);;	K01206|1.0e-97|boe:106299976|K01206 alpha-L-fucosidase [EC:3.2.1.51] | (RefSeq) alpha-L-fucosidase 3	--	--	GDSL-like Lipase/Acylhydrolase	Esterase OS=Hevea brasiliensis OX=3981 PE=1 SV=1	Lipase (Fragment) OS=Parasponia andersonii OX=3476 GN=PanWU01x14_247550 PE=3 SV=1	S	Function unknown	esterase-like [Ziziphus jujuba]
BMK_Unigene_079990	[M]	Cell wall/membrane/envelope biogenesis	Biological Process: glycolipid biosynthetic process (GO:0009247);; Molecular Function: transferase activity, transferring hexosyl groups (GO:0016758);;	K03715|5.1e-232|zju:107419930|K03715 1,2-diacylglycerol 3-beta-galactosyltransferase [EC:2.4.1.46] | (RefSeq) monogalactosyldiacylglycerol synthase, chloroplastic isoform X2	--	--	Monogalactosyldiacylglycerol (MGDG) synthase	Monogalactosyldiacylglycerol synthase, chloroplastic OS=Cucumis sativus OX=3659 PE=1 SV=1	Monogalactosyldiacylglycerol synthase OS=Prunus persica OX=3760 GN=PRUPE_1G396500 PE=3 SV=1	M	Cell wall/membrane/envelope biogenesis	monogalactosyldiacylglycerol synthase, chloroplastic isoform X2 [Ziziphus jujuba]
BMK_Unigene_155961	--	--	Biological Process: RNA processing (GO:0006396);;	--	--	--	NRDE-2, necessary for RNA interference	--	Uncharacterized protein OS=Carpinus fangiana OX=176857 GN=FH972_020666 PE=3 SV=1	S	Function unknown	protein NRDE2 homolog [Ziziphus jujuba]
BMK_Unigene_067627	--	--	--	K01369|6.9e-06|qsu:111986993|K01369 legumain [EC:3.4.22.34] | (RefSeq) vacuolar-processing enzyme-like	--	--	--	--	--	--	--	--
BMK_Unigene_080503	--	--	Molecular Function: structural constituent of ribosome (GO:0003735);; Cellular Component: ribosome (GO:0005840);; Biological Process: translational elongation (GO:0006414);;	K02943|7.1e-16|vcn:VOLCADRAFT_120883|K02943 large subunit ribosomal protein LP2 | (RefSeq) hypothetical protein	[J]	Translation, ribosomal structure and biogenesis	60s Acidic ribosomal protein	60S acidic ribosomal protein P2-2 OS=Arabidopsis thaliana OX=3702 GN=RPP2B PE=1 SV=1	60S acidic ribosomal protein P2 (Fragment) OS=Anthurium amnicola OX=1678845 GN=RLA2_3 PE=3 SV=1	J	Translation, ribosomal structure and biogenesis	ribosomal protein P2 [Capsaspora owczarzaki ATCC 30864]
BMK_Unigene_111968	--	--	Molecular Function: structural constituent of ribosome (GO:0003735);; Cellular Component: ribosome (GO:0005840);; Biological Process: translation (GO:0006412);;	K02995|1.8e-38|fve:101303866|K02995 small subunit ribosomal protein S8e | (RefSeq) 40S ribosomal protein S8-like	[J]	Translation, ribosomal structure and biogenesis	Ribosomal protein S8e	40S ribosomal protein S8 OS=Oryza sativa subsp. japonica OX=39947 GN=RPS8 PE=2 SV=2	40S ribosomal protein S8 OS=Cuscuta campestris OX=132261 GN=CCAM_LOCUS18606 PE=3 SV=1	J	Translation, ribosomal structure and biogenesis	hypothetical protein SeLEV6574_g04470 [Synchytrium endobioticum]
BMK_Unigene_144202	[QV]	--	Molecular Function: monooxygenase activity (GO:0004497);; Molecular Function: iron ion binding (GO:0005506);; Cellular Component: integral component of membrane (GO:0016021);; Biological Process: brassinosteroid biosynthetic process (GO:0016132);; Molecular Function: oxidoreductase activity, acting on paired donors, with incorporation or reduction of molecular oxygen (GO:0016705);; Molecular Func…	K09587|6.4e-229|zju:107408649|K09587 steroid 22-alpha-hydroxylase [EC:1.14.13.-] | (RefSeq) cytochrome P450 90B1-like	[QI]	--	Cytochrome P450	Cytochrome P450 90B1 OS=Arabidopsis thaliana OX=3702 GN=CYP90B1 PE=1 SV=2	PREDICTED: cytochrome P450 OS=Prunus dulcis OX=3755 GN=ALMOND_2B027812 PE=3 SV=1	Q	Secondary metabolites biosynthesis, transport and catabolism	cytochrome P450 90B1-like [Ziziphus jujuba]
BMK_Unigene_068536	--	--	Molecular Function: tropomyosin binding (GO:0005523);; Biological Process: pointed-end actin filament capping (GO:0051694);;	--	[Z]	Cytoskeleton	Tropomodulin	--	--	--	--	--
BMK_Unigene_325868	--	--	--	--	--	--	beta-acetyl hexosaminidase like;; Glycosyl hydrolase family 20, domain 2	--	--	--	--	glycoside hydrolase family 20 protein [Tulasnella calospora MUT 4182]
BMK_Unigene_173129	--	--	Biological Process: intracellular protein transport (GO:0006886);; Biological Process: vesicle-mediated transport (GO:0016192);; Cellular Component: membrane coat (GO:0030117);; Cellular Component: clathrin adaptor complex (GO:0030131);;	K12392|5.7e-08|adu:107477271|K12392 AP-1 complex subunit beta-1 | (RefSeq) beta-adaptin-like protein B isoform X1	[U]	Intracellular trafficking, secretion, and vesicular transport	Adaptin N terminal region	Beta-adaptin-like protein B OS=Arabidopsis thaliana OX=3702 GN=BETAB-AD PE=1 SV=1	Aste57867_14194 protein OS=Aphanomyces stellatus OX=120398 GN=Aste57867_14194 PE=3 SV=1	--	--	hypothetical protein M407DRAFT_16882 [Tulasnella calospora MUT 4182]
BMK_Unigene_080150	[DL]	--	Molecular Function: GTP binding (GO:0005525);;	K03979|1.0e-53|gsl:Gasu_38770|K03979 GTPase [EC:3.6.5.-] | (RefSeq) GTP-binding protein	[R]	General function prediction only	GTP1/OBG;; 50S ribosome-binding GTPase;; Ferrous iron transport protein B;; ADP-ribosylation factor family	Probable GTP-binding protein OBGM, mitochondrial OS=Arabidopsis thaliana OX=3702 GN=ATOBGM PE=2 SV=1	Uroporphyrinogen decarboxylase OS=Trema orientale OX=63057 GN=TorRG33x02_047390 PE=4 SV=1	S	Function unknown	probable GTP-binding protein OBGM, mitochondrial isoform X2 [Ziziphus jujuba]
BMK_Unigene_144982	[H]	Coenzyme transport and metabolism	Molecular Function: methyltransferase activity (GO:0008168);; Biological Process: methylation (GO:0032259);;	--	--	--	Methyltransferase domain;; Methyltransferase domain;; Methyltransferase domain;; Methyltransferase domain;; Methyltransferase domain;; ubiE/COQ5 methyltransferase family	Uncharacterized methyltransferase At1g78140, chloroplastic OS=Arabidopsis thaliana OX=3702 GN=At1g78140 PE=1 SV=1	Methyltransferase type OS=Trema orientale OX=63057 GN=TorRG33x02_003010 PE=4 SV=1	H	Coenzyme transport and metabolism	uncharacterized methyltransferase At1g78140, chloroplastic [Ziziphus jujuba]
BMK_Unigene_099654	--	--	Molecular Function: actin binding (GO:0003779);; Molecular Function: protein binding (GO:0005515);;	--	[Z]	Cytoskeleton	Calponin homology (CH) domain	--	Alpha-actinin-4 OS=Nannochloropsis gaditana OX=72520 GN=abpA PE=4 SV=1	--	--	hypothetical protein EHS24_004491 [Apiotrichum porosum]
BMK_Unigene_078309	--	--	Biological Process: protein glycosylation (GO:0006486);; Cellular Component: integral component of membrane (GO:0016021);; Molecular Function: transferase activity, transferring glycosyl groups (GO:0016757);;	K22846|3.7e-185|gmx:100816974|K22846 S-sulfo-L-cysteine synthase (O-acetyl-L-serine-dependent) [EC:2.5.1.144] | (RefSeq) BSAS; uncharacterized protein BSAS	[GMW]	--	Exostosin family;; ZF-HD protein dimerisation region	Probable arabinosyltransferase ARAD1 OS=Arabidopsis thaliana OX=3702 GN=ARAD1 PE=1 SV=1	Exostosin-like OS=Trema orientale OX=63057 GN=TorRG33x02_182930 PE=3 SV=1	--	--	probable arabinosyltransferase ARAD1 isoform X1 [Ziziphus jujuba]
BMK_Unigene_134967	--	--	Molecular Function: structural constituent of ribosome (GO:0003735);; Cellular Component: ribosome (GO:0005840);; Biological Process: translational elongation (GO:0006414);;	K02942|8.7e-13|eus:EUTSA_v10005602mg|K02942 large subunit ribosomal protein LP1 | (RefSeq) hypothetical protein	[J]	Translation, ribosomal structure and biogenesis	60s Acidic ribosomal protein	60S acidic ribosomal protein P1 OS=Zea mays OX=4577 GN=RPP1A PE=1 SV=1	60S acidic ribosomal protein P1 OS=Anthurium amnicola OX=1678845 GN=RpLP1_1 PE=3 SV=1	J	Translation, ribosomal structure and biogenesis	uncharacterized protein SmJEL517_g02114 [Synchytrium microbalum]
BMK_Unigene_085848	[J]	Translation, ribosomal structure and biogenesis	Molecular Function: structural constituent of ribosome (GO:0003735);; Cellular Component: ribosome (GO:0005840);; Biological Process: translation (GO:0006412);;	K02889|1.0e-32|oeu:111399492|K02889 large subunit ribosomal protein L21e | (RefSeq) 60S ribosomal protein L21-2	[J]	Translation, ribosomal structure and biogenesis	Ribosomal protein L21e	60S ribosomal protein L21-1 OS=Arabidopsis thaliana OX=3702 GN=RPL21A PE=2 SV=2	Uncharacterized protein OS=Camellia sinensis var. sinensis OX=542762 GN=TEA_018596 PE=3 SV=1	J	Translation, ribosomal structure and biogenesis	hypothetical protein TEA_018596 [Camellia sinensis var. sinensis]
BMK_Unigene_078585	[I]	Lipid transport and metabolism	Biological Process: lipid metabolic process (GO:0006629);; Cellular Component: integral component of membrane (GO:0016021);; Molecular Function: oxidoreductase activity, acting on paired donors, with oxidation of a pair of donors resulting in the reduction of molecular oxygen to two molecules of water (GO:0016717);;	K10256|4.6e-230|zju:107432351|K10256 omega-6 fatty acid desaturase / acyl-lipid omega-6 desaturase (Delta-12 desaturase) [EC:1.14.19.6 1.14.19.22] | (RefSeq) delta(12)-fatty-acid desaturase FAD2	--	--	Fatty acid desaturase;; Domain of unknown function (DUF3474)	Delta(12)-fatty-acid desaturase FAD2 OS=Vernicia fordii OX=73154 GN=FAD2 PE=1 SV=1	Fatty acid delta12-desturase FAD2-1 OS=Hiptage benghalensis OX=151834 PE=2 SV=1	I	Lipid transport and metabolism	delta(12)-fatty-acid desaturase FAD2 [Ziziphus jujuba]
BMK_Unigene_155386	--	--	Molecular Function: RNA binding (GO:0003723);; Molecular Function: metal ion binding (GO:0046872);;	K13192|0.0e+00|zju:107415481|K13192 RNA-binding protein 26 | (RefSeq) zinc finger CCCH domain-containing protein 41	[R]	General function prediction only	RNA recognition motif. (a.k.a. RRM, RBD, or RNP domain);; Nup53/35/40-type RNA recognition motif	Zinc finger CCCH domain-containing protein 41 OS=Arabidopsis thaliana OX=3702 GN=At3g27700 PE=1 SV=1	Zinc finger CCCH domain-containing protein 41 OS=Morus notabilis OX=981085 GN=L484_020548 PE=4 SV=1	A	RNA processing and modification	zinc finger CCCH domain-containing protein 41 [Ziziphus jujuba]
BMK_Unigene_068391	--	--	Biological Process: protein folding (GO:0006457);; Cellular Component: prefoldin complex (GO:0016272);; Molecular Function: unfolded protein binding (GO:0051082);;	K04798|1.2e-55|oeu:111407275|K04798 prefoldin beta subunit | (RefSeq) prefoldin subunit 6 isoform X1	[O]	Posttranslational modification, protein turnover, chaperones	Prefoldin subunit	--	Uncharacterized protein OS=Carpinus fangiana OX=176857 GN=FH972_000953 PE=3 SV=1	O	Posttranslational modification, protein turnover, chaperones	hypothetical protein FH972_000953 [Carpinus fangiana]
BMK_Unigene_155218	--	--	Cellular Component: integral component of membrane (GO:0016021);;	K23877|3.4e-70|atr:110006708|K23877 xyloglucan O-acetyltransferase | (RefSeq) protein ALTERED XYLOGLUCAN 4-like	--	--	GDSL/SGNH-like Acyl-Esterase family found in Pmr5 and Cas1p;; PMR5 N terminal Domain;; Heavy-metal-associated domain	Protein trichome birefringence-like 18 OS=Arabidopsis thaliana OX=3702 GN=TBL18 PE=2 SV=1	Protein trichome birefringence-like OS=Parasponia andersonii OX=3476 GN=PanWU01x14_084760 PE=3 SV=1	S	Function unknown	protein YLS7 [Ziziphus jujuba]
BMK_Unigene_170155	--	--	--	--	[A]	RNA processing and modification	--	--	--	--	--	--
BMK_Unigene_139428	--	--	Cellular Component: endoplasmic reticulum membrane (GO:0005789);; Biological Process: intracellular protein transport (GO:0006886);; Biological Process: endoplasmic reticulum to Golgi vesicle-mediated transport (GO:0006888);; Cellular Component: integral component of membrane (GO:0016021);; Biological Process: protein localization to endoplasmic reticulum exit site (GO:0070973);;	K14009|1.8e-83|zju:107414161|K14009 B-cell receptor-associated protein 31 | (RefSeq) B-cell receptor-associated protein 31-like	[V]	Defense mechanisms	Bap31/Bap29 cytoplasmic coiled-coil domain	--	Endoplasmic reticulum transmembrane protein OS=Rhizophora mucronata OX=61149 PE=3 SV=1	V	Defense mechanisms	B-cell receptor-associated protein 31-like [Ziziphus jujuba]
BMK_Unigene_080200	--	--	Cellular Component: cellular_component (GO:0005575);; Cellular Component: intracellular (GO:0005622);; Cellular Component: obsolete cell (GO:0005623);; Cellular Component: cytoplasm (GO:0005737);; Cellular Component: endoplasmic reticulum (GO:0005783);; Cellular Component: plasma membrane (GO:0005886);; Cellular Component: endomembrane system (GO:0012505);; Cellular Component: membrane (GO:001602…	--	--	--	Ankyrin repeats (many copies);; Ankyrin repeats (3 copies);; Ankyrin repeat;; Ankyrin repeat;; Ankyrin repeats (many copies);; Domain of unknown function	--	Ankyrin repeat-containing protein OS=Morus notabilis OX=981085 GN=L484_024552 PE=4 SV=1	S	Function unknown	ankyrin repeat-containing protein At5g02620-like [Ziziphus jujuba]
BMK_Unigene_155383	--	--	Cellular Component: mediator complex (GO:0016592);; Biological Process: regulation of phenylpropanoid metabolic process (GO:2000762);;	--	--	--	--	Mediator of RNA polymerase II transcription subunit 33A OS=Arabidopsis thaliana OX=3702 GN=MED33A PE=1 SV=1	Uncharacterized protein OS=Malus baccata OX=106549 GN=C1H46_018657 PE=4 SV=1	S	Function unknown	mediator of RNA polymerase II transcription subunit 33A-like isoform X1 [Ziziphus jujuba]
BMK_Unigene_066704	--	--	--	--	--	--	--	--	Uncharacterized protein OS=Morus notabilis OX=981085 GN=L484_006989 PE=4 SV=1	--	--	hypothetical protein L484_006989 [Morus notabilis]
BMK_Unigene_000395	[T]	Signal transduction mechanisms	Molecular Function: phosphoprotein phosphatase activity (GO:0004721);;	K15498|5.0e-124|gmx:100820006|K15498 serine/threonine-protein phosphatase 6 catalytic subunit [EC:3.1.3.16] | (RefSeq) uncharacterized protein LOC100820006	[DT]	--	Calcineurin-like phosphoesterase	Phytochrome-associated serine/threonine-protein phosphatase OS=Pisum sativum OX=3888 GN=FYPP PE=1 SV=1	Serine/threonine-protein phosphatase OS=Gossypium barbadense OX=3634 GN=GOBAR_AA37676 PE=3 SV=1	--	--	hypothetical protein GOBAR_AA37676 [Gossypium barbadense]
BMK_Unigene_078411	[G]	Carbohydrate transport and metabolism	Cellular Component: integral component of membrane (GO:0016021);; Molecular Function: transmembrane transporter activity (GO:0022857);;	K08193|0.0e+00|zju:107432976|K08193 MFS transporter, ACS family, solute carrier family 17 (sodium-dependent inorganic phosphate cotransporter), other | (RefSeq) ascorbate transporter, chloroplastic-like	[G]	Carbohydrate transport and metabolism	Major Facilitator Superfamily;; Sugar (and other) transporter;; Transmembrane secretion effector	Ascorbate transporter, chloroplastic OS=Arabidopsis thaliana OX=3702 GN=PHT4;4 PE=1 SV=1	Major facilitator OS=Trema orientale OX=63057 GN=TorRG33x02_121710 PE=4 SV=1	G	Carbohydrate transport and metabolism	ascorbate transporter, chloroplastic-like [Ziziphus jujuba]
BMK_Unigene_137535	--	--	--	--	--	--	--	--	Uncharacterized protein OS=Malus baccata OX=106549 GN=C1H46_037019 PE=4 SV=1	--	--	hypothetical protein C1H46_037019 [Malus baccata]
BMK_Unigene_144150	--	--	Molecular Function: aminopeptidase activity (GO:0004177);; Molecular Function: solute:proton antiporter activity (GO:0015299);; Cellular Component: integral component of membrane (GO:0016021);;	K02952|4.9e-08|aip:107648613|K02952 small subunit ribosomal protein S13 | (RefSeq) 30S ribosomal protein S13, chloroplastic-like	--	--	Serine aminopeptidase, S33;; Alpha/beta hydrolase family;; alpha/beta hydrolase fold	--	Serine aminopeptidase OS=Parasponia andersonii OX=3476 GN=PanWU01x14_031400 PE=4 SV=1	S	Function unknown	uncharacterized protein LOC107409402 [Ziziphus jujuba]
BMK_Unigene_003276	--	--	Cellular Component: endoplasmic reticulum (GO:0005783);; Cellular Component: plasma membrane (GO:0005886);; Biological Process: regulation of proton transport (GO:0010155);; Cellular Component: integral component of membrane (GO:0016021);;	--	--	--	--	Proton pump-interactor 1 OS=Arabidopsis thaliana OX=3702 GN=PPI1 PE=1 SV=2	Proton pump-interactor OS=Trema orientale OX=63057 GN=TorRG33x02_012660 PE=4 SV=1	S	Function unknown	proton pump-interactor 1 [Ziziphus jujuba]
BMK_Unigene_156825	[J]	Translation, ribosomal structure and biogenesis	Molecular Function: structural constituent of ribosome (GO:0003735);; Cellular Component: ribosome (GO:0005840);; Biological Process: translation (GO:0006412);; Molecular Function: zinc ion binding (GO:0008270);;	K02980|7.4e-20|eus:EUTSA_v10026741mg|K02980 small subunit ribosomal protein S29e | (RefSeq) hypothetical protein	[J]	Translation, ribosomal structure and biogenesis	Ribosomal protein S14p/S29e	40S ribosomal protein S29 OS=Griffithsia japonica OX=83288 GN=RPS29 PE=3 SV=1	Small subunit ribosomal protein S29e OS=Tetraselmis sp. GSL018 OX=582737 GN=RPS29 PE=3 SV=1	J	Translation, ribosomal structure and biogenesis	40S ribosomal protein S29 [Syncephalastrum racemosum]
BMK_Unigene_105259	--	--	--	--	[OT]	--	--	--	--	--	--	--
BMK_Unigene_072541	--	--	Cellular Component: SAGA complex (GO:0000124);; Molecular Function: translation initiation factor activity (GO:0003743);; Cellular Component: transcription factor TFIID complex (GO:0005669);; Biological Process: DNA-templated transcription, initiation (GO:0006352);; Cellular Component: SLIK (SAGA-like) complex (GO:0046695);; Molecular Function: protein heterodimerization activity (GO:0046982);;	K03126|4.7e-62|zju:107406980|K03126 transcription initiation factor TFIID subunit 12 | (RefSeq) transcription initiation factor TFIID subunit 12b-like	[K]	Transcription	--	Transcription initiation factor TFIID subunit 12b OS=Arabidopsis thaliana OX=3702 GN=TAF12B PE=1 SV=1	PREDICTED: mRNAion initiation factor OS=Prunus dulcis OX=3755 GN=ALMOND_2B023036 PE=3 SV=1	K	Transcription	transcription initiation factor TFIID subunit 12b-like isoform X1 [Ziziphus jujuba]
BMK_Unigene_066138	--	--	Molecular Function: hydrolase activity, hydrolyzing O-glycosyl compounds (GO:0004553);; Biological Process: carbohydrate metabolic process (GO:0005975);;	K01183|5.9e-84|zju:112492640|K01183 chitinase [EC:3.2.1.14] | (RefSeq) acidic endochitinase-like	[M]	Cell wall/membrane/envelope biogenesis	Glycosyl hydrolases family 18	Hevamine-A OS=Hevea brasiliensis OX=3981 PE=1 SV=2	Uncharacterized protein OS=Acer yangbiense OX=1000413 GN=EZV62_009966 PE=3 SV=1	G	Carbohydrate transport and metabolism	acidic endochitinase-like [Ziziphus jujuba]
BMK_Unigene_075951	[G]	Carbohydrate transport and metabolism	Biological Process: glucose metabolic process (GO:0006006);; Molecular Function: oxidoreductase activity, acting on the aldehyde or oxo group of donors, NAD or NADP as acceptor (GO:0016620);; Molecular Function: NADP binding (GO:0050661);; Molecular Function: NAD binding (GO:0051287);;	K05298|4.7e-130|zju:107419772|K05298 glyceraldehyde-3-phosphate dehydrogenase (NADP+) (phosphorylating) [EC:1.2.1.13] | (RefSeq) glyceraldehyde-3-phosphate dehydrogenase B, chloroplastic	[G]	Carbohydrate transport and metabolism	Glyceraldehyde 3-phosphate dehydrogenase, NAD binding domain;; Glyceraldehyde 3-phosphate dehydrogenase, C-terminal domain;; CP12 domain	Glyceraldehyde-3-phosphate dehydrogenase GAPB, chloroplastic OS=Arabidopsis thaliana OX=3702 GN=GAPB PE=1 SV=2	Glyceraldehyde-3-phosphate dehydrogenase OS=Trema orientale OX=63057 GN=TorRG33x02_137800 PE=3 SV=1	G	Carbohydrate transport and metabolism	glyceraldehyde-3-phosphate dehydrogenase B, chloroplastic [Ziziphus jujuba]
BMK_Unigene_071918	[QV]	--	Molecular Function: iron ion binding (GO:0005506);; Molecular Function: oxidoreductase activity, acting on paired donors, with incorporation or reduction of molecular oxygen (GO:0016705);; Molecular Function: heme binding (GO:0020037);;	K20665|5.8e-290|zju:107427926|K20665 jasmonoyl-L-amino acid 12-hydroxylase [EC:1.14.14.48] | (RefSeq) cytochrome P450 94B3 isoform X1	[QI]	--	Cytochrome P450	Cytochrome P450 94B1 OS=Arabidopsis thaliana OX=3702 GN=CYP94B1 PE=1 SV=1	Cytochrome P450, E-class, group I OS=Parasponia andersonii OX=3476 GN=PanWU01x14_146920 PE=3 SV=1	--	--	cytochrome P450 94B3 isoform X1 [Ziziphus jujuba]
BMK_Unigene_281462	--	--	Cellular Component: integral component of membrane (GO:0016021);; Biological Process: transmembrane transport (GO:0055085);;	--	[S]	Function unknown	Major Facilitator Superfamily;; Ion channel regulatory protein UNC-93	UNC93-like protein 1 OS=Arabidopsis thaliana OX=3702 GN=At1g18000 PE=2 SV=2	UNC93-like protein 2 (Fragment) OS=Anthurium amnicola OX=1678845 GN=At1g18010_0 PE=3 SV=1	S	Function unknown	hypothetical protein BN1708_013339 [Verticillium longisporum]
BMK_Unigene_066114	--	--	Molecular Function: MAP kinase kinase kinase activity (GO:0004709);; Molecular Function: ATP binding (GO:0005524);;	--	--	--	Arabidopsis broad-spectrum mildew resistance protein RPW8	--	Putative mitogen-activated protein kinase kinase kinase STE-STE11 family OS=Rosa chinensis OX=74649 GN=RchiOBHm_Chr2g0104831 PE=4 SV=1	S	Function unknown	probable disease resistance protein At5g66900 [Ziziphus jujuba]
BMK_Unigene_086995	--	--	Molecular Function: oxidoreductase activity (GO:0016491);; Molecular Function: metal ion binding (GO:0046872);;	K00505|6.0e-10|qsu:112002355|K00505 tyrosinase [EC:1.14.18.1] | (RefSeq) tyrosinase-like	--	--	Common central domain of tyrosinase	--	Polyphenol oxidase OS=Chlorella sorokiniana OX=3076 GN=C2E21_1144 PE=4 SV=1	--	--	hypothetical protein C1645_821961 [Glomus cerebriforme]
BMK_Unigene_072066	--	--	--	--	--	--	--	--	--	--	--	hypothetical protein FNV43_RR08240 [Rhamnella rubrinervis]
BMK_Unigene_141136	--	--	Biological Process: metal ion transport (GO:0030001);; Molecular Function: metal ion binding (GO:0046872);;	--	[P]	Inorganic ion transport and metabolism	Heavy-metal-associated domain	Copper transport protein ATX1 OS=Arabidopsis thaliana OX=3702 GN=ATX1 PE=1 SV=2	HMA domain-containing protein OS=Arabidopsis thaliana OX=3702 GN=AN1_LOCUS5633 PE=4 SV=1	P	Inorganic ion transport and metabolism	homolog of anti-oxidant 1 [Arabidopsis thaliana]
BMK_Unigene_268154	[J]	Translation, ribosomal structure and biogenesis	Molecular Function: translation release factor activity (GO:0003747);;	K03265|2.1e-45|mis:MICPUN_100558|K03265 peptide chain release factor subunit 1 | (RefSeq) predicted protein	[J]	Translation, ribosomal structure and biogenesis	eRF1 domain 3	Eukaryotic peptide chain release factor subunit 1-2 OS=Arabidopsis thaliana OX=3702 GN=ERF1-2 PE=1 SV=1	Eukaryotic peptide chain release factor subunit 1 OS=Porphyridium purpureum OX=35688 GN=FVE85_0150 PE=3 SV=1	J	Translation, ribosomal structure and biogenesis	Eukaryotic peptide chain release factor subunit 1 [Porphyridium purpureum]
BMK_Unigene_014023	--	--	--	--	[R]	General function prediction only	--	--	--	--	--	--
BMK_Unigene_302552	[P]	Inorganic ion transport and metabolism	Molecular Function: sodium:phosphate symporter activity (GO:0005436);; Molecular Function: phosphate ion transmembrane transporter activity (GO:0015114);; Cellular Component: membrane (GO:0016020);; Cellular Component: integral component of membrane (GO:0016021);; Biological Process: sodium-dependent phosphate transport (GO:0044341);;	K14683|7.8e-14|mis:MICPUN_84293|K14683 solute carrier family 34 (sodium-dependent phosphate cotransporter) | (RefSeq) Phosphate:Na+ symporter	--	--	Na+/Pi-cotransporter	--	Uncharacterized protein (Fragment) OS=Thalassiosira oceanica OX=159749 GN=THAOC_36688 PE=3 SV=1	P	Inorganic ion transport and metabolism	hypothetical protein THAOC_36688, partial [Thalassiosira oceanica]
BMK_Unigene_253479	[O]	Posttranslational modification, protein turnover, chaperones	--	K09490|1.8e-36|lang:109332845|K09490 endoplasmic reticulum chaperone BiP [EC:3.6.4.10] | (RefSeq) luminal-binding protein 5-like	[O]	Posttranslational modification, protein turnover, chaperones	Hsp70 protein	Heat shock 70 kDa protein BIP1 OS=Oryza sativa subsp. japonica OX=39947 GN=BIP1 PE=1 SV=1	Heat shock protein cognate 3 OS=Anthurium amnicola OX=1678845 GN=Hsc70-3_1 PE=4 SV=1	O	Posttranslational modification, protein turnover, chaperones	predicted protein [Hordeum vulgare subsp. vulgare]
BMK_Unigene_142827	--	--	Cellular Component: integral component of membrane (GO:0016021);;	K15285|4.5e-102|zju:107413961|K15285 solute carrier family 35, member E3 | (RefSeq) UDP-xylose transporter 3-like	[GE]	--	Triose-phosphate Transporter family;; EamA-like transporter family	UDP-xylose transporter 3 OS=Arabidopsis thaliana OX=3702 GN=UXT3 PE=1 SV=1	TPT domain-containing protein OS=Malus baccata OX=106549 GN=C1H46_028445 PE=4 SV=1	--	--	UDP-xylose transporter 3-like [Ziziphus jujuba]
BMK_Unigene_002544	[IR]	--	Molecular Function: nucleotide binding (GO:0000166);; Molecular Function: molecular_function (GO:0003674);; Molecular Function: catalytic activity (GO:0003824);; Molecular Function: binding (GO:0005488);; Cellular Component: cellular_component (GO:0005575);; Cellular Component: extracellular region (GO:0005576);; Biological Process: organic acid metabolic process (GO:0006082);; Biological Process…	K00108|3.9e-31|qsu:112020403|K00108 choline dehydrogenase [EC:1.1.99.1] | (RefSeq) uncharacterized protein LOC112020403	[R]	General function prediction only	GMC oxidoreductase	Protein HOTHEAD OS=Arabidopsis thaliana OX=3702 GN=HTH PE=1 SV=1	GMC_OxRdtase_N domain-containing protein OS=Fistulifera solaris OX=1519565 GN=FisN_3Hu590 PE=4 SV=1	L	Replication, recombination and repair	alcohol oxidase [Stagonospora sp. SRC1lsM3a]
BMK_Unigene_077638	--	--	Molecular Function: hydrolase activity (GO:0016787);;	--	--	--	--	Nudix hydrolase 9 OS=Arabidopsis thaliana OX=3702 GN=NUDT9 PE=2 SV=1	Nudix hydrolase domain-containing protein OS=Gossypium tomentosum OX=34277 GN=ES332_D05G107000v1 PE=4 SV=1	S	Function unknown	nudix hydrolase 9 [Ziziphus jujuba]
BMK_Unigene_264805	--	--	--	--	--	--	Perilipin family	--	--	--	--	--
BMK_Unigene_001088	--	--	--	--	--	--	--	--	Uncharacterized protein OS=Trema orientale OX=63057 GN=TorRG33x02_018450 PE=4 SV=1	--	--	uncharacterized protein LOC107413145 isoform X1 [Ziziphus jujuba]
BMK_Unigene_075494	--	--	Cellular Component: integral component of membrane (GO:0016021);; Molecular Function: protein-cysteine S-palmitoyltransferase activity (GO:0019706);;	K20028|7.0e-92|zju:107435695|K20028 palmitoyltransferase ZDHHC2/15/20 [EC:2.3.1.225] | (RefSeq) probable protein S-acyltransferase 14	[R]	General function prediction only	DHHC palmitoyltransferase	Probable protein S-acyltransferase 14 OS=Arabidopsis thaliana OX=3702 GN=PAT14 PE=2 SV=1	S-acyltransferase OS=Malus domestica OX=3750 GN=DVH24_014097 PE=3 SV=1	I	Lipid transport and metabolism	probable protein S-acyltransferase 14 [Ziziphus jujuba]
BMK_Unigene_153320	--	--	Biological Process: spliceosomal snRNP assembly (GO:0000387);; Molecular Function: RNA binding (GO:0003723);; Cellular Component: spliceosomal complex (GO:0005681);; Cellular Component: U5 snRNP (GO:0005682);; Cellular Component: U1 snRNP (GO:0005685);; Cellular Component: U2 snRNP (GO:0005686);; Cellular Component: U4 snRNP (GO:0005687);; Cellular Component: U4/U6 x U5 tri-snRNP complex (GO:0046…	K11097|6.5e-16|dcr:108216548|K11097 small nuclear ribonucleoprotein E | (RefSeq) small nuclear ribonucleoprotein E	[A]	RNA processing and modification	--	--	Small nuclear ribonucleoprotein E OS=Daucus carota subsp. sativus OX=79200 GN=DCAR_014711 PE=3 SV=1	A	RNA processing and modification	hypothetical protein DCAR_014711 [Daucus carota subsp. sativus]
BMK_Unigene_078900	--	--	Cellular Component: mitochondrion (GO:0005739);; Cellular Component: chloroplast inner membrane (GO:0009706);; Cellular Component: integral component of membrane (GO:0016021);; Biological Process: plant organ development (GO:0099402);;	K20854|2.1e-14|pavi:110744711|K20854 hydroxyproline O-galactosyltransferase HPGT [EC:2.4.1.-] | (RefSeq) hydroxyproline O-galactosyltransferase HPGT1-like isoform X1	--	--	Protein RETICULATA-related	Protein RETICULATA-RELATED 1, chloroplastic OS=Arabidopsis thaliana OX=3702 GN=RER1 PE=1 SV=1	Uncharacterized protein OS=Prunus persica OX=3760 GN=PRUPE_6G263400 PE=3 SV=1	S	Function unknown	protein RETICULATA, chloroplastic [Ziziphus jujuba]
BMK_Unigene_147745	--	--	Molecular Function: DNA binding (GO:0003677);; Cellular Component: nucleus (GO:0005634);;	K09422|1.2e-134|zju:107431903|K09422 transcription factor MYB, plant | (RefSeq) transcription factor RAX2	[K]	Transcription	Myb-like DNA-binding domain;; Myb-like DNA-binding domain	Transcription factor MYB36 OS=Arabidopsis thaliana OX=3702 GN=MYB36 PE=1 SV=1	Transcription factor RAX2 OS=Pyrus ussuriensis x Pyrus communis OX=2448454 GN=D8674_024578 PE=4 SV=1	--	--	transcription factor RAX2 [Ziziphus jujuba]
BMK_Unigene_153008	[J]	Translation, ribosomal structure and biogenesis	Molecular Function: nucleic acid binding (GO:0003676);; Molecular Function: lysine-tRNA ligase activity (GO:0004824);; Molecular Function: ATP binding (GO:0005524);; Cellular Component: cytoplasm (GO:0005737);; Biological Process: lysyl-tRNA aminoacylation (GO:0006430);;	K04567|0.0e+00|zju:107411037|K04567 lysyl-tRNA synthetase, class II [EC:6.1.1.6] | (RefSeq) lysine--tRNA ligase, cytoplasmic	[J]	Translation, ribosomal structure and biogenesis	tRNA synthetases class II (D, K and N);; OB-fold nucleic acid binding domain;; tRNA synthetases class II (D, K and N)	Lysine--tRNA ligase, cytoplasmic OS=Arabidopsis thaliana OX=3702 GN=At3g11710 PE=1 SV=1	Lysine--tRNA ligase OS=Morus notabilis OX=981085 GN=L484_016748 PE=3 SV=1	J	Translation, ribosomal structure and biogenesis	lysine--tRNA ligase, cytoplasmic [Ziziphus jujuba]
BMK_Unigene_150844	[EH]	--	Molecular Function: magnesium ion binding (GO:0000287);; Molecular Function: acetolactate synthase activity (GO:0003984);; Biological Process: isoleucine biosynthetic process (GO:0009097);; Biological Process: valine biosynthetic process (GO:0009099);; Molecular Function: thiamine pyrophosphate binding (GO:0030976);; Molecular Function: flavin adenine dinucleotide binding (GO:0050660);;	K01652|0.0e+00|zju:107418034|K01652 acetolactate synthase I/II/III large subunit [EC:2.2.1.6] | (RefSeq) acetolactate synthase 3, chloroplastic	[EH]	--	Thiamine pyrophosphate enzyme, N-terminal TPP binding domain;; Thiamine pyrophosphate enzyme, C-terminal TPP binding domain;; Thiamine pyrophosphate enzyme, central domain	Acetolactate synthase 2, chloroplastic OS=Nicotiana tabacum OX=4097 GN=ALS SURB PE=1 SV=1	Acetolactate synthase OS=Malus domestica OX=3750 GN=DVH24_035655 PE=3 SV=1	--	--	acetolactate synthase 3, chloroplastic [Ziziphus jujuba]
BMK_Unigene_136903	--	--	Cellular Component: nucleus (GO:0005634);; Biological Process: response to cold (GO:0009409);; Biological Process: response to virus (GO:0009615);; Biological Process: response to blue light (GO:0009637);; Biological Process: response to absence of light (GO:0009646);; Biological Process: response to abscisic acid (GO:0009737);; Biological Process: response to red light (GO:0010114);; Biological …	--	--	--	--	Cold-regulated protein 27 OS=Arabidopsis thaliana OX=3702 GN=COR27 PE=1 SV=1	Uncharacterized protein OS=Prunus persica OX=3760 GN=PRUPE_1G435100 PE=4 SV=1	S	Function unknown	uncharacterized protein LOC107420000 [Ziziphus jujuba]
BMK_Unigene_142172	[F]	Nucleotide transport and metabolism	Molecular Function: nucleoside diphosphate kinase activity (GO:0004550);; Molecular Function: ATP binding (GO:0005524);; Biological Process: GTP biosynthetic process (GO:0006183);; Biological Process: UTP biosynthetic process (GO:0006228);; Biological Process: CTP biosynthetic process (GO:0006241);;	K00940|5.3e-53|qsu:111995039|K00940 nucleoside-diphosphate kinase [EC:2.7.4.6] | (RefSeq) nucleoside diphosphate kinase-like	[F]	Nucleotide transport and metabolism	Nucleoside diphosphate kinase	Nucleoside diphosphate kinase II, chloroplastic OS=Arabidopsis thaliana OX=3702 GN=NDPK2 PE=1 SV=2	Nucleoside diphosphate kinase (Fragment) OS=Anthurium amnicola OX=1678845 GN=awd_0 PE=3 SV=1	F	Nucleotide transport and metabolism	hypothetical protein GUITHDRAFT_93413, partial [Guillardia theta CCMP2712]
BMK_Unigene_068365	--	--	Cellular Component: integral component of membrane (GO:0016021);;	--	--	--	Late embryogenesis abundant protein	NDR1/HIN1-like protein 26 OS=Arabidopsis thaliana OX=3702 GN=NHL26 PE=2 SV=1	LEA_2 domain-containing protein OS=Malus domestica OX=3750 GN=DVH24_011990 PE=4 SV=1	S	Function unknown	NDR1/HIN1-like protein 12 [Ziziphus jujuba]
BMK_Unigene_150127	[DZ]	--	Molecular Function: photoreceptor activity (GO:0009881);; Biological Process: response to UV-B (GO:0010224);; Molecular Function: protein homodimerization activity (GO:0042803);;	K10615|9.1e-56|ppp:112282946|K10615 E3 ubiquitin-protein ligase HERC4 [EC:2.3.2.26] | (RefSeq) probable E3 ubiquitin-protein ligase HERC4 isoform X1	[S]	Function unknown	Regulator of chromosome condensation (RCC1) repeat;; Regulator of chromosome condensation (RCC1) repeat	Ultraviolet-B receptor UVR8 OS=Arabidopsis thaliana OX=3702 GN=UVR8 PE=1 SV=1	Ultraviolet-B receptor UVR8 OS=Betula platyphylla OX=78630 PE=2 SV=1	L	Replication, recombination and repair	ultraviolet-B receptor UVR8 [Ziziphus jujuba]
BMK_Unigene_082814	[E]	Amino acid transport and metabolism	Molecular Function: aminopeptidase activity (GO:0004177);; Molecular Function: manganese ion binding (GO:0030145);;	K14213|6.1e-107|zju:107423964|K14213 Xaa-Pro dipeptidase [EC:3.4.13.9] | (RefSeq) xaa-Pro dipeptidase	[R]	General function prediction only	Metallopeptidase family M24	--	AMP_N domain-containing protein OS=Fagus sylvatica OX=28930 GN=FSB_LOCUS28272 PE=4 SV=1	E	Amino acid transport and metabolism	xaa-Pro dipeptidase [Ziziphus jujuba]
BMK_Unigene_144220	[H]	Coenzyme transport and metabolism	Biological Process: chlorophyll biosynthetic process (GO:0015995);; Biological Process: methylation (GO:0032259);; Molecular Function: magnesium protoporphyrin IX methyltransferase activity (GO:0046406);;	K03428|9.6e-173|zju:107407353|K03428 magnesium-protoporphyrin O-methyltransferase [EC:2.1.1.11] | (RefSeq) magnesium protoporphyrin IX methyltransferase, chloroplastic	[H]	Coenzyme transport and metabolism	Magnesium-protoporphyrin IX methyltransferase C-terminus;; Methyltransferase domain;; Methyltransferase domain;; Methyltransferase domain;; Methyltransferase domain;; Methyltransferase domain;; Methyltransferase small domain	Magnesium protoporphyrin IX methyltransferase, chloroplastic OS=Arabidopsis thaliana OX=3702 GN=CHLM PE=1 SV=1	Magnesium-protoporphyrin IX methyltransferase OS=Trema orientale OX=63057 GN=TorRG33x02_066690 PE=4 SV=1	H	Coenzyme transport and metabolism	magnesium protoporphyrin IX methyltransferase, chloroplastic [Ziziphus jujuba]
BMK_Unigene_163306	--	--	--	--	--	--	--	--	Glycine-rich protein OS=Arabidopsis thaliana OX=3702 GN=At4g29020 PE=2 SV=1	S	Function unknown	glycine-rich protein [Arabidopsis thaliana]
BMK_Unigene_146038	[J]	Translation, ribosomal structure and biogenesis	Molecular Function: structural constituent of ribosome (GO:0003735);; Cellular Component: ribosome (GO:0005840);; Biological Process: translation (GO:0006412);;	K02926|2.0e-150|zju:107410830|K02926 large subunit ribosomal protein L4 | (RefSeq) 50S ribosomal protein L4, chloroplastic	[J]	Translation, ribosomal structure and biogenesis	Ribosomal protein L4/L1 family	50S ribosomal protein L4, chloroplastic OS=Arabidopsis thaliana OX=3702 GN=RPL4 PE=2 SV=2	50S ribosomal protein L4 OS=Morus notabilis OX=981085 GN=L484_022055 PE=3 SV=1	J	Translation, ribosomal structure and biogenesis	50S ribosomal protein L4, chloroplastic [Ziziphus jujuba]
BMK_Unigene_063831	--	--	Molecular Function: SNARE binding (GO:0000149);; Molecular Function: molecular_function (GO:0003674);; Molecular Function: SNAP receptor activity (GO:0005484);; Molecular Function: binding (GO:0005488);; Molecular Function: protein binding (GO:0005515);; Cellular Component: cellular_component (GO:0005575);; Cellular Component: intracellular (GO:0005622);; Cellular Component: obsolete cell (GO:000…	K08511|2.4e-23|dzi:111278590|K08511 vesicle-associated membrane protein 72 | (RefSeq) vesicle-associated membrane protein 721-like	[U]	Intracellular trafficking, secretion, and vesicular transport	Synaptobrevin	Vesicle-associated membrane protein 721 OS=Arabidopsis thaliana OX=3702 GN=VAMP721 PE=2 SV=1	VAMP722 protein OS=Hibiscus syriacus OX=106335 GN=F3Y22_tig00117005pilonHSYRG00109 PE=3 SV=1	U	Intracellular trafficking, secretion, and vesicular transport	vesicle-associated membrane protein 721-like [Durio zibethinus]
BMK_Unigene_070632	--	--	Molecular Function: electron transfer activity (GO:0009055);; Cellular Component: integral component of membrane (GO:0016021);;	--	--	--	Plastocyanin-like domain	Mavicyanin OS=Cucurbita pepo OX=3663 PE=1 SV=1	Phytocyanin domain-containing protein OS=Malus baccata OX=106549 GN=C1H46_036779 PE=4 SV=1	S	Function unknown	mavicyanin [Ziziphus jujuba]
BMK_Unigene_082741	--	--	--	K19041|0.0e+00|zju:107432549|K19041 E3 ubiquitin-protein ligase RNF38/44 [EC:2.3.2.27] | (RefSeq) probable E3 ubiquitin-protein ligase ZFP1 isoform X1	[O]	Posttranslational modification, protein turnover, chaperones	Ring finger domain;; RING-H2 zinc finger domain;; Zinc finger, C3HC4 type (RING finger);; Zinc finger, C3HC4 type (RING finger)	Probable E3 ubiquitin-protein ligase ZFP1 OS=Oryza sativa subsp. japonica OX=39947 GN=ZFP1 PE=1 SV=1	PREDICTED: E3 OS=Prunus dulcis OX=3755 GN=ALMOND_2B015400 PE=4 SV=1	O	Posttranslational modification, protein turnover, chaperones	probable E3 ubiquitin-protein ligase ZFP1 isoform X1 [Ziziphus jujuba]
BMK_Unigene_141569	[MN]	--	--	--	--	--	LysM domain	LysM domain-containing GPI-anchored protein 1 OS=Arabidopsis thaliana OX=3702 GN=LYM1 PE=1 SV=1	Putative lysM domain-containing GPI-anchored protein 1-like OS=Davidia involucrata OX=16924 GN=Din_042949 PE=4 SV=1	S	Function unknown	lysM domain-containing GPI-anchored protein 1-like isoform X1 [Ziziphus jujuba]
BMK_Unigene_150349	--	--	Biological Process: signal transduction (GO:0007165);;	--	--	--	Tify domain binding domain	Ninja-family protein AFP2 OS=Arabidopsis thaliana OX=3702 GN=AFP2 PE=1 SV=1	Uncharacterized protein OS=Prunus persica OX=3760 GN=PRUPE_ppa006974mg PE=3 SV=1	S	Function unknown	ninja-family protein AFP3-like isoform X1 [Ziziphus jujuba]
BMK_Unigene_128906	--	--	Molecular Function: hydrolase activity (GO:0016787);;	K22390|6.5e-50|zju:107418013|K22390 acid phosphatase type 7 | (RefSeq) probable inactive purple acid phosphatase 27	[G]	Carbohydrate transport and metabolism	Calcineurin-like phosphoesterase	Probable inactive purple acid phosphatase 1 OS=Arabidopsis thaliana OX=3702 GN=PAP1 PE=2 SV=1	Calcineurin-like phosphoesterase OS=Parasponia andersonii OX=3476 GN=PanWU01x14_029280 PE=4 SV=1	G	Carbohydrate transport and metabolism	probable inactive purple acid phosphatase 27 [Ziziphus jujuba]
BMK_Unigene_064773	[G]	Carbohydrate transport and metabolism	Molecular Function: fructose-bisphosphate aldolase activity (GO:0004332);; Biological Process: glycolytic process (GO:0006096);;	K01623|2.1e-120|brp:103866289|K01623 fructose-bisphosphate aldolase, class I [EC:4.1.2.13] | (RefSeq) fructose-bisphosphate aldolase 5, cytosolic	[G]	Carbohydrate transport and metabolism	Fructose-bisphosphate aldolase class-I	Fructose-bisphosphate aldolase 5, cytosolic OS=Arabidopsis thaliana OX=3702 GN=FBA5 PE=1 SV=1	Fructose-bisphosphate aldolase OS=Brassica campestris OX=3711 GN=BRAA01T01734Z PE=3 SV=1	G	Carbohydrate transport and metabolism	fructose-bisphosphate aldolase-like [Rhodamnia argentea]
BMK_Unigene_108339	--	--	--	--	[K]	Transcription	HMG (high mobility group) box	--	--	--	--	--
BMK_Unigene_070165	[J]	Translation, ribosomal structure and biogenesis	Molecular Function: structural constituent of ribosome (GO:0003735);; Cellular Component: ribosome (GO:0005840);; Biological Process: translation (GO:0006412);;	K02899|5.4e-77|cmax:111489672|K02899 large subunit ribosomal protein L27 | (RefSeq) 50S ribosomal protein L27, chloroplastic	[J]	Translation, ribosomal structure and biogenesis	Ribosomal L27 protein	50S ribosomal protein L27, chloroplastic OS=Spinacia oleracea OX=3562 GN=RPL27 PE=1 SV=2	Ribosomal protein OS=Trema orientale OX=63057 GN=TorRG33x02_089090 PE=3 SV=1	J	Translation, ribosomal structure and biogenesis	hypothetical protein FNV43_RR22337 [Rhamnella rubrinervis]
BMK_Unigene_157692	--	--	--	--	--	--	--	--	--	--	--	Uncharacterized protein TPAR_01532 [Tolypocladium paradoxum]
BMK_Unigene_083695	--	--	Molecular Function: zinc ion binding (GO:0008270);;	K22262|1.1e-183|qsu:112034235|K22262 WD repeat and FYVE domain-containing protein 3 | (RefSeq) protein SPIRRIG	[R]	General function prediction only	PPR repeat;; PPR repeat family;; PPR repeat;; DYW family of nucleic acid deaminases;; Pentatricopeptide repeat domain;; Tetratricopeptide repeat;; Pentacotripeptide-repeat region of PRORP	Pentatricopeptide repeat-containing protein At1g18485 OS=Arabidopsis thaliana OX=3702 GN=PCMP-H8 PE=2 SV=2	pentatricopeptide repeat-containing protein At1g18485 OS=Juglans regia OX=51240 GN=LOC108980817 PE=3 SV=1	S	Function unknown	pentatricopeptide repeat-containing protein At1g18485 [Ziziphus jujuba]
BMK_Unigene_072082	--	--	Cellular Component: nucleus (GO:0005634);; Molecular Function: protein heterodimerization activity (GO:0046982);;	K08066|1.9e-54|vvi:100243367|K08066 nuclear transcription factor Y, gamma | (RefSeq) nuclear transcription factor Y subunit C-2	[K]	Transcription	Core histone H2A/H2B/H3/H4;; Histone-like transcription factor (CBF/NF-Y) and archaeal histone	Nuclear transcription factor Y subunit C-1 OS=Arabidopsis thaliana OX=3702 GN=NFYC1 PE=1 SV=1	Nuclear transcription factor Y subunit C OS=Trema orientale OX=63057 GN=TorNFYC3 PE=4 SV=1	B	Chromatin structure and dynamics	nuclear transcription factor Y subunit C-1 [Ziziphus jujuba]
BMK_Unigene_078796	[J]	Translation, ribosomal structure and biogenesis	Molecular Function: nucleic acid binding (GO:0003676);; Molecular Function: lysine-tRNA ligase activity (GO:0004824);; Molecular Function: ATP binding (GO:0005524);; Cellular Component: cytoplasm (GO:0005737);; Biological Process: lysyl-tRNA aminoacylation (GO:0006430);;	K04567|1.4e-133|zju:107415008|K04567 lysyl-tRNA synthetase, class II [EC:6.1.1.6] | (RefSeq) lysine--tRNA ligase, chloroplastic/mitochondrial	[J]	Translation, ribosomal structure and biogenesis	OB-fold nucleic acid binding domain;; tRNA synthetases class II (D, K and N)	Lysine--tRNA ligase, chloroplastic/mitochondrial OS=Arabidopsis thaliana OX=3702 GN=OVA5 PE=2 SV=1	Lysine--tRNA ligase OS=Fagus sylvatica OX=28930 GN=FSB_LOCUS36004 PE=3 SV=1	J	Translation, ribosomal structure and biogenesis	lysine--tRNA ligase, chloroplastic/mitochondrial [Ziziphus jujuba]
BMK_Unigene_002977	--	--	Molecular Function: RNA binding (GO:0003723);;	--	--	--	RNA recognition motif. (a.k.a. RRM, RBD, or RNP domain)	--	RRM domain-containing protein OS=Carpinus fangiana OX=176857 GN=FH972_016281 PE=4 SV=1	A	RNA processing and modification	probable RNA-binding protein 18 isoform X1 [Ziziphus jujuba]
BMK_Unigene_152314	--	--	--	K14306|7.1e-92|zju:107422660|K14306 nuclear pore complex protein Nup62 | (RefSeq) nuclear pore complex protein NUP62-like	--	--	--	--	Uncharacterized protein OS=Parasponia andersonii OX=3476 GN=PanWU01x14_147870 PE=4 SV=1	--	--	nuclear pore complex protein NUP62-like, partial [Ziziphus jujuba]
BMK_Unigene_096421	--	--	Molecular Function: protein binding (GO:0005515);; Cellular Component: cellular_component (GO:0005575);; Cellular Component: obsolete cell (GO:0005623);; Cellular Component: plasma membrane (GO:0005886);; Biological Process: cell communication (GO:0007154);; Biological Process: signal transduction (GO:0007165);; Biological Process: biological_process (GO:0008150);; Biological Process: response to…	--	[Z]	Cytoskeleton	Leucine rich repeat;; Leucine Rich repeats (2 copies);; Leucine Rich repeat;; Leucine Rich Repeat	--	--	S	Function unknown	--
BMK_Unigene_080390	[R]	General function prediction only	Biological Process: lipid catabolic process (GO:0016042);; Molecular Function: hydrolase activity (GO:0016787);;	--	[I]	Lipid transport and metabolism	Patatin-like phospholipase	Patatin-like protein 7 OS=Arabidopsis thaliana OX=3702 GN=PLP7 PE=2 SV=1	Patatin OS=Morus notabilis OX=981085 GN=L484_015590 PE=3 SV=1	I	Lipid transport and metabolism	patatin-like protein 7 [Ziziphus jujuba]
BMK_Unigene_069157	[J]	Translation, ribosomal structure and biogenesis	Molecular Function: RNA binding (GO:0003723);; Molecular Function: structural constituent of ribosome (GO:0003735);; Cellular Component: ribosome (GO:0005840);; Biological Process: translation (GO:0006412);;	K02964|2.1e-60|zju:107423162|K02964 small subunit ribosomal protein S18e | (RefSeq) 40S ribosomal protein S18-like	[J]	Translation, ribosomal structure and biogenesis	Ribosomal protein S13/S18	40S ribosomal protein S18 OS=Arabidopsis thaliana OX=3702 GN=RPS18A PE=1 SV=1	PREDICTED: 40S ribosomal OS=Prunus dulcis OX=3755 GN=ALMOND_2B013035 PE=3 SV=1	J	Translation, ribosomal structure and biogenesis	hypothetical protein F2P56_015685, partial [Juglans regia]
BMK_Unigene_152350	--	--	Molecular Function: UDP-glycosyltransferase activity (GO:0008194);;	K18823|1.6e-103|lang:109334198|K18823 soyasaponin III rhamnosyltransferase [EC:2.4.1.273] | (RefSeq) soyasaponin III rhamnosyltransferase-like	[GC]	--	UDP-glucoronosyl and UDP-glucosyl transferase	UDP-glycosyltransferase 91C1 OS=Arabidopsis thaliana OX=3702 GN=UGT91C1 PE=1 SV=1	UDP-glucuronosyl/UDP-glucosyltransferase OS=Trema orientale OX=63057 GN=TorRG33x02_143570 PE=4 SV=1	--	--	UDP-glycosyltransferase 91C1 [Ziziphus jujuba]
BMK_Unigene_080849	[T]	Signal transduction mechanisms	Molecular Function: protein serine/threonine kinase activity (GO:0004674);; Molecular Function: ATP binding (GO:0005524);; Cellular Component: integral component of membrane (GO:0016021);;	K13418|9.3e-128|smo:SELMODRAFT_443356|K13418 somatic embryogenesis receptor kinase 1 [EC:2.7.10.1 2.7.11.1] | (RefSeq) SERK2b-2; hypothetical protein	--	--	Protein tyrosine and serine/threonine kinase;; Protein kinase domain;; Leucine rich repeat;; Leucine rich repeat N-terminal domain;; Leucine Rich repeats (2 copies);; Leucine Rich Repeat	Probable LRR receptor-like serine/threonine-protein kinase At5g63710 OS=Arabidopsis thaliana OX=3702 GN=At5g63710 PE=1 SV=1	Protein kinase domain-containing protein OS=Prunus persica OX=3760 GN=PRUPE_4G285600 PE=3 SV=1	T	Signal transduction mechanisms	probable LRR receptor-like serine/threonine-protein kinase At5g63710 isoform X2 [Prunus persica]
BMK_Unigene_056533	--	--	Molecular Function: monooxygenase activity (GO:0004497);; Molecular Function: iron ion binding (GO:0005506);; Cellular Component: integral component of membrane (GO:0016021);; Molecular Function: oxidoreductase activity, acting on paired donors, with incorporation or reduction of molecular oxygen (GO:0016705);; Molecular Function: heme binding (GO:0020037);;	K20667|4.1e-19|zju:107429226|K20667 beta-amyrin 28-monooxygenase [EC:1.14.14.126] | (RefSeq) beta-amyrin 28-oxidase-like isoform X1	--	--	--	Beta-amyrin 28-monooxygenase OS=Panax ginseng OX=4054 GN=CYP716A52v2 PE=1 SV=1	Cytochrome P450, E-class, group I OS=Parasponia andersonii OX=3476 GN=PanWU01x14_095940 PE=3 SV=1	Q	Secondary metabolites biosynthesis, transport and catabolism	beta-amyrin 28-oxidase-like isoform X1 [Ziziphus jujuba]
BMK_Unigene_147442	[M]	Cell wall/membrane/envelope biogenesis	Cellular Component: integral component of membrane (GO:0016021);;	K08679|6.6e-269|zju:107422361|K08679 UDP-glucuronate 4-epimerase [EC:5.1.3.6] | (RefSeq) UDP-glucuronate 4-epimerase 6	[M]	Cell wall/membrane/envelope biogenesis	GDP-mannose 4,6 dehydratase;; NAD dependent epimerase/dehydratase family;; 3-beta hydroxysteroid dehydrogenase/isomerase family;; RmlD substrate binding domain;; Polysaccharide biosynthesis protein;; Male sterility protein	UDP-glucuronate 4-epimerase 6 OS=Arabidopsis thaliana OX=3702 GN=GAE6 PE=1 SV=1	NAD(P)-bd_dom domain-containing protein OS=Fagus sylvatica OX=28930 GN=FSB_LOCUS11873 PE=4 SV=1	M	Cell wall/membrane/envelope biogenesis	UDP-glucuronate 4-epimerase 6 [Ziziphus jujuba]
BMK_Unigene_076272	--	--	Molecular Function: nucleic acid binding (GO:0003676);; Molecular Function: endonuclease activity (GO:0004519);; Biological Process: DNA catabolic process (GO:0006308);;	--	--	--	S1/P1 Nuclease	Endonuclease 1 OS=Arabidopsis thaliana OX=3702 GN=ENDO1 PE=1 SV=1	Aspergillus nuclease S(1) OS=Morus notabilis OX=981085 GN=L484_006381 PE=3 SV=1	G	Carbohydrate transport and metabolism	endonuclease 1-like [Ziziphus jujuba]
BMK_Unigene_164609	--	--	--	--	--	--	--	--	--	--	--	hypothetical protein K457DRAFT_151319 [Mortierella elongata AG-77]
BMK_Unigene_151163	--	--	--	--	--	--	--	--	Uncharacterized protein OS=Morus notabilis OX=981085 GN=L484_025316 PE=4 SV=1	--	--	LOW QUALITY PROTEIN: interaptin [Ziziphus jujuba]
BMK_Unigene_076397	--	--	Molecular Function: mRNA binding (GO:0003729);; Cellular Component: U1 snRNP (GO:0005685);; Biological Process: mRNA splice site selection (GO:0006376);;	--	[A]	RNA processing and modification	LUC7 N_terminus	--	Luc7-related OS=Trema orientale OX=63057 GN=TorRG33x02_149740 PE=3 SV=1	A	RNA processing and modification	putative RNA-binding protein Luc7-like 2 isoform X3 [Morus notabilis]
BMK_Unigene_003709	[L]	Replication, recombination and repair	Molecular Function: nucleotidase activity (GO:0008252);;	K03787|7.1e-140|zju:107423163|K03787 5'-nucleotidase [EC:3.1.3.5] | (RefSeq) uncharacterized protein LOC107423163 isoform X1	--	--	Survival protein SurE	--	5'-nucleotidase OS=Davidia involucrata OX=16924 GN=Din_044312 PE=3 SV=1	S	Function unknown	uncharacterized protein LOC107423163 isoform X1 [Ziziphus jujuba]
BMK_Unigene_158509	--	--	--	--	--	--	--	--	--	--	--	hypothetical protein VFPFJ_04176 [Purpureocillium lilacinum]
BMK_Unigene_149183	--	--	Molecular Function: mannosyltransferase activity (GO:0000030);; Cellular Component: integral component of endoplasmic reticulum membrane (GO:0030176);;	K03845|2.0e-177|zju:107426367|K03845 alpha-1,3-mannosyltransferase [EC:2.4.1.258] | (RefSeq) dol-P-Man:Man(5)GlcNAc(2)-PP-Dol alpha-1,3-mannosyltransferase isoform X1	[G]	Carbohydrate transport and metabolism	ALG3 protein;; ALG3 protein	Dol-P-Man:Man(5)GlcNAc(2)-PP-Dol alpha-1,3-mannosyltransferase OS=Arabidopsis thaliana OX=3702 GN=ALG3 PE=1 SV=1	Glycosyltransferase, ALG OS=Trema orientale OX=63057 GN=TorRG33x02_075580 PE=4 SV=1	G	Carbohydrate transport and metabolism	dol-P-Man:Man(5)GlcNAc(2)-PP-Dol alpha-1,3-mannosyltransferase isoform X1 [Ziziphus jujuba]
BMK_Unigene_250315	--	--	Molecular Function: NAD+ ADP-ribosyltransferase activity (GO:0003950);;	K10798|1.8e-16|ccp:CHC_T00003917001|K10798 poly [ADP-ribose] polymerase 2/3/4 [EC:2.4.2.30] | (RefSeq) hypothetical protein	[KLO]	--	Poly(ADP-ribose) polymerase catalytic domain	--	Uncharacterized protein OS=Ectocarpus sp. CCAP 1310/34 OX=867726 GN=ESUBFT_359_23 PE=4 SV=1	--	--	poly synthetase 3 [Capsaspora owczarzaki ATCC 30864]
BMK_Unigene_077353	--	--	Molecular Function: DNA-binding transcription factor activity (GO:0003700);; Cellular Component: nucleus (GO:0005634);; Biological Process: response to gibberellin (GO:0009739);;	K14494|3.0e-63|bna:106426289|K14494 DELLA protein | (RefSeq) DELLA protein RGL1	--	--	GRAS domain family	Scarecrow-like protein 3 OS=Arabidopsis thaliana OX=3702 GN=SCL3 PE=1 SV=1	Scarecrow-like protein 3 isoform X1 OS=Populus alba OX=43335 GN=D5086_0000197410 PE=3 SV=1	K	Transcription	scarecrow-like protein 3 [Ziziphus jujuba]
BMK_Unigene_113304	[C]	Energy production and conversion	Cellular Component: mitochondrion (GO:0005739);; Biological Process: acetyl-CoA biosynthetic process from pyruvate (GO:0006086);; Molecular Function: transferase activity, transferring acyl groups (GO:0016746);; Cellular Component: pyruvate dehydrogenase complex (GO:0045254);;	K00627|3.4e-20|bvg:104887207|K00627 pyruvate dehydrogenase E2 component (dihydrolipoamide acetyltransferase) [EC:2.3.1.12] | (RefSeq) dihydrolipoyllysine-residue acetyltransferase component 1 of pyruvate dehydrogenase complex, mitochondrial	[C]	Energy production and conversion	Biotin-requiring enzyme	Dihydrolipoyllysine-residue acetyltransferase component 1 of pyruvate dehydrogenase complex, mitochondrial OS=Arabidopsis thaliana OX=3702 GN=LTA3 PE=1 SV=2	Dihydrolipoamide acetyltransferase component of pyruvate dehydrogenase complex OS=Theobroma cacao OX=3641 GN=TCM_043471 PE=3 SV=1	C	Energy production and conversion	PREDICTED: dihydrolipoyllysine-residue acetyltransferase component 1 of pyruvate dehydrogenase complex, mitochondrial [Beta vulgaris subsp. vulgaris]
BMK_Unigene_078664	[O]	Posttranslational modification, protein turnover, chaperones	Molecular Function: oligosaccharyl transferase activity (GO:0004576);; Biological Process: protein glycosylation (GO:0006486);; Cellular Component: integral component of membrane (GO:0016021);;	K07151|0.0e+00|mdm:103449627|K07151 dolichyl-diphosphooligosaccharide---protein glycosyltransferase [EC:2.4.99.18] | (RefSeq) dolichyl-diphosphooligosaccharide--protein glycosyltransferase subunit STT3A	[O]	Posttranslational modification, protein turnover, chaperones	Oligosaccharyl transferase STT3 subunit	Dolichyl-diphosphooligosaccharide--protein glycosyltransferase subunit STT3A OS=Arabidopsis thaliana OX=3702 GN=STT3A PE=2 SV=1	Dolichyl-diphosphooligosaccharide--protein glycotransferase OS=Trema orientale OX=63057 GN=TorRG33x02_034770 PE=3 SV=1	O	Posttranslational modification, protein turnover, chaperones	Oligosaccharyl transferase, STT3 subunit [Trema orientale]
BMK_Unigene_148329	--	--	Molecular Function: motor activity (GO:0003774);; Cellular Component: myosin complex (GO:0016459);;	--	[Z]	Cytoskeleton	Myosin tail	--	Paramyosin, long form OS=Anthurium amnicola OX=1678845 GN=Prm PE=4 SV=1	--	--	hypothetical protein GQ607_017958, partial [Colletotrichum asianum]
BMK_Unigene_173932	--	--	Biological Process: regulation of transcription, DNA-templated (GO:0006355);;	--	--	--	--	Probable transcription factor At3g04930 OS=Arabidopsis thaliana OX=3702 GN=At3g04930 PE=1 SV=1	Uncharacterized protein OS=Arabidopsis thaliana OX=3702 GN=AXX17_At3g04410 PE=3 SV=1	K	Transcription	hypothetical protein AXX17_AT3G04410 [Arabidopsis thaliana]
BMK_Unigene_119768	--	--	Biological Process: cortical microtubule organization (GO:0043622);;	K18635|2.3e-49|ath:AT2G03680|K18635 protein SPIRAL1 and related proteins | (RefSeq) SPR1; spiral1	--	--	--	Protein SPIRAL1 OS=Arabidopsis thaliana OX=3702 GN=SPR1 PE=2 SV=1	Uncharacterized protein (Fragment) OS=Capsella rubella OX=81985 GN=CARUB_v10018134mg PE=3 SV=1	S	Function unknown	hypothetical protein CARUB_v10018134mg, partial [Capsella rubella]
BMK_Unigene_067340	--	--	Molecular Function: enzyme inhibitor activity (GO:0004857);;	K01051|1.0e-15|bna:106380668|K01051 pectinesterase [EC:3.1.1.11] | (RefSeq) pectinesterase/pectinesterase inhibitor 3-like	--	--	Plant invertase/pectin methylesterase inhibitor	Pectinesterase inhibitor 6 OS=Arabidopsis thaliana OX=3702 GN=PMEI6 PE=2 SV=1	PMEI domain-containing protein OS=Fagus sylvatica OX=28930 GN=FSB_LOCUS17141 PE=4 SV=1	S	Function unknown	pectinesterase inhibitor 6-like [Ziziphus jujuba]
BMK_Unigene_069805	[J]	Translation, ribosomal structure and biogenesis	Molecular Function: structural constituent of ribosome (GO:0003735);; Cellular Component: ribosome (GO:0005840);; Biological Process: translation (GO:0006412);;	K02912|2.1e-68|zju:107430871|K02912 large subunit ribosomal protein L32e | (RefSeq) 60S ribosomal protein L32-1-like	[J]	Translation, ribosomal structure and biogenesis	Ribosomal protein L32	60S ribosomal protein L32-1 OS=Arabidopsis thaliana OX=3702 GN=RPL32A PE=2 SV=2	60S ribosomal protein L32-1-like OS=Juglans regia OX=51240 GN=LOC109000709 PE=3 SV=1	J	Translation, ribosomal structure and biogenesis	60S ribosomal protein L32-1-like [Ziziphus jujuba]
BMK_Unigene_153598	--	--	Molecular Function: transferase activity (GO:0016740);;	K21843|0.0e+00|zju:107408611|K21843 tetratricopeptide repeat protein 7 | (RefSeq) protein NPGR1-like	[T]	Signal transduction mechanisms	Tetratricopeptide repeat;; Tetratricopeptide repeat;; Tetratricopeptide repeat	Protein NPGR1 OS=Arabidopsis thaliana OX=3702 GN=NPGR1 PE=1 SV=1	N-terminal acetyltransferase A, auxiliary subunit OS=Trema orientale OX=63057 GN=TorRG33x02_131540 PE=4 SV=1	T	Signal transduction mechanisms	protein NPGR1-like [Ziziphus jujuba]
BMK_Unigene_154465	--	--	Molecular Function: protein binding (GO:0005515);; Biological Process: regulation of transcription, DNA-templated (GO:0006355);; Biological Process: regulation of transcription by RNA polymerase II (GO:0006357);; Biological Process: proteolysis (GO:0006508);; Biological Process: ubiquitin-dependent protein catabolic process (GO:0006511);; Biological Process: nitrogen compound metabolic process (G…	K24348|2.9e-250|zju:107422136|K24348 UBX domain-containing protein 1/4 | (RefSeq) plant UBX domain-containing protein 11	[R]	General function prediction only	UBX domain	Plant UBX domain-containing protein 11 OS=Arabidopsis thaliana OX=3702 GN=PUX11 PE=1 SV=2	UBX domain-containing protein OS=Trema orientale OX=63057 GN=TorRG33x02_006030 PE=4 SV=1	S	Function unknown	plant UBX domain-containing protein 11 [Ziziphus jujuba]
BMK_Unigene_141755	--	--	Molecular Function: transferase activity, transferring acyl groups other than amino-acyl groups (GO:0016747);;	K13065|2.8e-255|zju:107428425|K13065 shikimate O-hydroxycinnamoyltransferase [EC:2.3.1.133] | (RefSeq) vinorine synthase-like	--	--	Transferase family	Vinorine synthase OS=Rauvolfia serpentina OX=4060 GN=ACT PE=1 SV=2	Uncharacterized protein OS=Carpinus fangiana OX=176857 GN=FH972_009293 PE=3 SV=1	S	Function unknown	vinorine synthase-like [Ziziphus jujuba]
BMK_Unigene_152036	[E]	Amino acid transport and metabolism	Biological Process: cellular amino acid metabolic process (GO:0006520);; Molecular Function: lyase activity (GO:0016829);;	K01620|1.1e-160|zju:107412325|K01620 threonine aldolase [EC:4.1.2.48] | (RefSeq) probable low-specificity L-threonine aldolase 1	[E]	Amino acid transport and metabolism	Beta-eliminating lyase;; Aminotransferase class I and II	Probable low-specificity L-threonine aldolase 1 OS=Arabidopsis thaliana OX=3702 GN=THA1 PE=1 SV=1	Putative low-specificity L-threonine aldolase 1 isoform X2 OS=Prunus yedoensis var. nudiflora OX=2094558 GN=Pyn_17562 PE=3 SV=1	E	Amino acid transport and metabolism	probable low-specificity L-threonine aldolase 1 [Ziziphus jujuba]
BMK_Unigene_134749	--	--	Molecular Function: methyltransferase activity (GO:0008168);; Biological Process: methylation (GO:0032259);;	--	--	--	Methyltransferase domain;; Methyltransferase domain;; Methyltransferase domain;; Methyltransferase domain;; Methyltransferase domain;; Putative methyltransferase	--	Demethylmenaquinone methyltransferase OS=Anthurium amnicola OX=1678845 GN=ubiE_47 PE=4 SV=1	--	--	hypothetical protein M407DRAFT_19910 [Tulasnella calospora MUT 4182]
BMK_Unigene_069904	[O]	Posttranslational modification, protein turnover, chaperones	Molecular Function: cysteine-type peptidase activity (GO:0008234);;	K01373|1.5e-217|zju:107412702|K01373 cathepsin F [EC:3.4.22.41] | (RefSeq) cysteine proteinase 15A-like	[O]	Posttranslational modification, protein turnover, chaperones	Papain family cysteine protease;; Cathepsin propeptide inhibitor domain (I29)	Cysteine protease RD19A OS=Arabidopsis thaliana OX=3702 GN=RD19A PE=1 SV=1	Cyseine protease OS=Trema orientale OX=63057 GN=TorCP24 PE=3 SV=1	O	Posttranslational modification, protein turnover, chaperones	cysteine proteinase 15A-like [Ziziphus jujuba]
BMK_Unigene_082941	[D]	Cell cycle control, cell division, chromosome partitioning	Molecular Function: ubiquitin-protein transferase activity (GO:0004842);; Biological Process: cell surface receptor signaling pathway (GO:0007166);;	K10260|5.8e-18|cre:CHLREDRAFT_205525|K10260 F-box and WD-40 domain protein 7 | (RefSeq) predicted protein	[S]	Function unknown	Armadillo/beta-catenin-like repeat;; U-box domain;; HEAT repeats;; Armadillo-like;; Kinesin-associated protein (KAP)	U-box domain-containing protein 14 OS=Arabidopsis thaliana OX=3702 GN=PUB14 PE=1 SV=1	RING-type E3 ubiquitin transferase OS=Morus notabilis OX=981085 GN=L484_013027 PE=4 SV=1	S	Function unknown	U-box domain-containing protein 14-like [Ziziphus jujuba]
BMK_Unigene_126144	[Q]	Secondary metabolites biosynthesis, transport and catabolism	Molecular Function: oxidoreductase activity (GO:0016491);; Molecular Function: metal ion binding (GO:0046872);;	K05933|3.0e-186|ath:AT1G62380|K05933 aminocyclopropanecarboxylate oxidase [EC:1.14.17.4] | (RefSeq) ACO2; ACC oxidase 2	[QR]	--	2OG-Fe(II) oxygenase superfamily;; non-haem dioxygenase in morphine synthesis N-terminal	1-aminocyclopropane-1-carboxylate oxidase 2 OS=Arabidopsis thaliana OX=3702 GN=ACO2 PE=1 SV=2	Uncharacterized protein OS=Arabidopsis thaliana OX=3702 GN=AN1_LOCUS5232 PE=4 SV=1	Q	Secondary metabolites biosynthesis, transport and catabolism	ACC oxidase 2 [Arabidopsis thaliana]
BMK_Unigene_137333	--	--	--	--	--	--	Ataxin-2 C-terminal region	Protein EARLY RESPONSIVE TO DEHYDRATION 15 OS=Glycine max OX=3847 GN=ERD15 PE=2 SV=1	Ataxin-2, C-terminal OS=Trema orientale OX=63057 GN=TorRG33x02_209600 PE=4 SV=1	S	Function unknown	protein EARLY RESPONSIVE TO DEHYDRATION 15-like [Ziziphus jujuba]
BMK_Unigene_110820	--	--	Molecular Function: metal ion binding (GO:0046872);;	--	--	--	LIM domain	--	LIM zinc-binding domain-containing protein OS=Medicago truncatula OX=3880 PE=2 SV=1	--	--	unknown [Medicago truncatula]
BMK_Unigene_081827	--	--	Cellular Component: P-body (GO:0000932);; Biological Process: nuclear-transcribed mRNA catabolic process (GO:0000956);; Molecular Function: molecular_function (GO:0003674);; Molecular Function: binding (GO:0005488);; Molecular Function: protein binding (GO:0005515);; Cellular Component: cellular_component (GO:0005575);; Cellular Component: intracellular (GO:0005622);; Cellular Component: obsolete…	K18749|1.1e-294|zju:107430583|K18749 protein LSM14 | (RefSeq) protein decapping 5-like	[U]	Intracellular trafficking, secretion, and vesicular transport	Scd6-like Sm domain;; FDF domain;; Ataxin 2 SM domain	Protein decapping 5 OS=Arabidopsis thaliana OX=3702 GN=DCP5 PE=1 SV=1	Lsm14-DFDF-FFD-domain containing protein OS=Trema orientale OX=63057 GN=TorRG33x02_181040 PE=4 SV=1	U	Intracellular trafficking, secretion, and vesicular transport	protein decapping 5-like [Ziziphus jujuba]
BMK_Unigene_149362	[O]	Posttranslational modification, protein turnover, chaperones	Cellular Component: integral component of membrane (GO:0016021);; Biological Process: cell redox homeostasis (GO:0045454);;	K09580|1.7e-233|zju:107420522|K09580 protein disulfide-isomerase A1 [EC:5.3.4.1] | (RefSeq) protein disulfide-isomerase 5-2	[O]	Posttranslational modification, protein turnover, chaperones	Thioredoxin;; Thioredoxin-like domain;; ERp29, N-terminal domain;; Calsequestrin	Protein disulfide-isomerase 5-2 OS=Arabidopsis thaliana OX=3702 GN=PDIL5-2 PE=1 SV=1	DnaJ-like OS=Parasponia andersonii OX=3476 GN=PanWU01x14_327720 PE=4 SV=1	O	Posttranslational modification, protein turnover, chaperones	protein disulfide-isomerase 5-2 [Ziziphus jujuba]
BMK_Unigene_143649	[O]	Posttranslational modification, protein turnover, chaperones	Molecular Function: transferase activity (GO:0016740);;	K00799|3.4e-94|zju:107433279|K00799 glutathione S-transferase [EC:2.5.1.18] | (RefSeq) glutathione S-transferase F13-like	[O]	Posttranslational modification, protein turnover, chaperones	C2 domain;; Glutathione S-transferase, C-terminal domain;; Glutathione S-transferase, C-terminal domain;; Glutathione S-transferase, C-terminal domain	Glutathione S-transferase F13 OS=Arabidopsis thaliana OX=3702 GN=GSTF13 PE=3 SV=1	Glutathione transferase OS=Morella rubra OX=262757 GN=CJ030_MR5G017269 PE=3 SV=1	O	Posttranslational modification, protein turnover, chaperones	protein SRC2-like [Ziziphus jujuba]
BMK_Unigene_154074	[C]	Energy production and conversion	Molecular Function: fumarate hydratase activity (GO:0004333);; Biological Process: tricarboxylic acid cycle (GO:0006099);; Biological Process: fumarate metabolic process (GO:0006106);; Cellular Component: tricarboxylic acid cycle enzyme complex (GO:0045239);;	K01679|1.7e-184|gra:105794532|K01679 fumarate hydratase, class II [EC:4.2.1.2] | (RefSeq) fumarate hydratase 1, mitochondrial	[C]	Energy production and conversion	Lyase;; Phosphate-induced protein 1 conserved region;; Fumarase C C-terminus	Fumarate hydratase 1, mitochondrial OS=Arabidopsis thaliana OX=3702 GN=FUM1 PE=1 SV=2	Fumarate hydratase OS=Gossypium darwinii OX=34276 GN=ES288_D07G149400v1 PE=3 SV=1	C	Energy production and conversion	hypothetical protein FNV43_RR23583 [Rhamnella rubrinervis]
BMK_Unigene_152391	--	--	--	--	--	--	--	--	--	--	--	hypothetical protein CDD83_3231 [Cordyceps sp. RAO-2017]
BMK_Unigene_108453	[E]	Amino acid transport and metabolism	Molecular Function: lyase activity (GO:0016829);; Biological Process: transsulfuration (GO:0019346);; Molecular Function: pyridoxal phosphate binding (GO:0030170);;	K01758|6.3e-14|gsl:Gasu_38670|K01758 cystathionine gamma-lyase [EC:4.4.1.1] | (RefSeq) cystathionine gamma-lyase	[E]	Amino acid transport and metabolism	Cys/Met metabolism PLP-dependent enzyme	Cystathionine gamma-synthase 1, chloroplastic OS=Arabidopsis thaliana OX=3702 GN=CGS1 PE=1 SV=3	Cystathionine gamma-lyase OS=Anthurium amnicola OX=1678845 GN=cysA_0 PE=3 SV=1	E	Amino acid transport and metabolism	uncharacterized protein PHACADRAFT_254186 [Phanerochaete carnosa HHB-10118-sp]
BMK_Unigene_083611	--	--	Molecular Function: actin filament binding (GO:0051015);;	--	[Z]	Cytoskeleton	Gelsolin repeat	--	Uncharacterized protein (Fragment) OS=Nothophytophthora sp. Chile5 OX=2483409 GN=BBJ28_00016844 PE=4 SV=1	--	--	hypothetical protein SpCBS45565_g04270 [Spizellomyces sp. 'palustris']
BMK_Unigene_083254	--	--	Molecular Function: protein binding (GO:0005515);;	K14552|0.0e+00|zju:107432272|K14552 NET1-associated nuclear protein 1 (U3 small nucleolar RNA-associated protein 17) | (RefSeq) WD repeat-containing protein 75	[R]	General function prediction only	WD domain, G-beta repeat	--	WD repeat containing protein OS=Trema orientale OX=63057 GN=TorRG33x02_235520 PE=4 SV=1	S	Function unknown	WD repeat-containing protein 75 [Ziziphus jujuba]
BMK_Unigene_279799	--	--	Cellular Component: ribosome (GO:0005840);;	K02975|3.5e-24|mng:MNEG_11312|K02975 small subunit ribosomal protein S25e | (RefSeq) 40S ribosomal protein S25-3	[J]	Translation, ribosomal structure and biogenesis	S25 ribosomal protein	40S ribosomal protein S25-2 OS=Arabidopsis thaliana OX=3702 GN=RPS25B PE=3 SV=1	40S ribosomal protein S25 (Fragment) OS=Noccaea caerulescens OX=107243 GN=LC_TR8042_c0_g1_i1_g.28168 PE=3 SV=1	J	Translation, ribosomal structure and biogenesis	hypothetical protein SpCBS45565_g03245 [Spizellomyces sp. 'palustris']
BMK_Unigene_300674	--	--	--	--	--	--	--	--	--	--	--	hypothetical protein M407DRAFT_241712 [Tulasnella calospora MUT 4182]
BMK_Unigene_075683	--	--	Cellular Component: integral component of membrane (GO:0016021);;	--	--	--	Plant protein of unknown function	UPF0481 protein At3g47200 OS=Arabidopsis thaliana OX=3702 GN=At3g47200 PE=2 SV=1	Uncharacterized protein OS=Morus notabilis OX=981085 GN=L484_013795 PE=4 SV=1	S	Function unknown	UPF0481 protein At3g47200 [Ziziphus jujuba]
BMK_Unigene_328542	--	--	--	--	--	--	Syndecan domain	--	--	--	--	--
BMK_Unigene_319602	--	--	--	--	[E]	Amino acid transport and metabolism	--	--	--	--	--	--
BMK_Unigene_138729	[Q]	Secondary metabolites biosynthesis, transport and catabolism	Molecular Function: metal ion binding (GO:0046872);; Molecular Function: desacetoxyvindoline 4-hydroxylase activity (GO:0050590);;	K13229|3.3e-83|ats:109766943|K13229 2,4-dihydroxy-1,4-benzoxazin-3-one-glucoside dioxygenase [EC:1.14.11.59] | (RefSeq) LOC109766943; DIBOA-glucoside dioxygenase BX6-like	[QR]	--	2OG-Fe(II) oxygenase superfamily;; non-haem dioxygenase in morphine synthesis N-terminal	1-aminocyclopropane-1-carboxylate oxidase homolog 1 OS=Arabidopsis thaliana OX=3702 GN=At1g06620 PE=2 SV=1	Putative deacetoxyvindoline 4-hydroxylase OS=Rosa chinensis OX=74649 GN=RchiOBHm_Chr4g0392151 PE=3 SV=1	Q	Secondary metabolites biosynthesis, transport and catabolism	1-aminocyclopropane-1-carboxylate oxidase homolog 1-like [Ziziphus jujuba]
BMK_Unigene_129437	--	--	Molecular Function: MAP kinase activity (GO:0004707);; Molecular Function: ATP binding (GO:0005524);;	K04371|8.2e-58|zju:107423242|K04371 mitogen-activated protein kinase 1/3 [EC:2.7.11.24] | (RefSeq) mitogen-activated protein kinase 15	[T]	Signal transduction mechanisms	Protein kinase domain;; Protein tyrosine and serine/threonine kinase	Mitogen-activated protein kinase 16 OS=Arabidopsis thaliana OX=3702 GN=MPK16 PE=2 SV=2	Mitogen-activated protein kinase OS=Gossypium darwinii OX=34276 GN=ES288_A02G032000v1 PE=4 SV=1	T	Signal transduction mechanisms	mitogen-activated protein kinase 15 [Ziziphus jujuba]
BMK_Unigene_071855	--	--	Biological Process: protein secretion (GO:0009306);; Biological Process: vesicle-mediated transport (GO:0016192);; Cellular Component: integral component of Golgi membrane (GO:0030173);;	--	[R]	General function prediction only	Eukaryotic protein of unknown function (DUF846)	Golgi apparatus membrane protein-like protein ECHIDNA OS=Arabidopsis thaliana OX=3702 GN=ECH PE=1 SV=1	Golgi apparatus membrane protein TVP23 OS=Prunus persica OX=3760 GN=PRUPE_1G561100 PE=3 SV=1	S	Function unknown	unnamed protein product [Prunus armeniaca]
BMK_Unigene_215399	--	--	--	--	--	--	--	--	uncharacterized protein LOC107809580 OS=Nicotiana tabacum OX=4097 GN=LOC107809580 PE=4 SV=1	--	--	uncharacterized protein LOC104104846 [Nicotiana tomentosiformis]
BMK_Unigene_079352	[I]	Lipid transport and metabolism	Biological Process: phospholipid biosynthetic process (GO:0008654);; Cellular Component: integral component of membrane (GO:0016021);; Molecular Function: phosphotransferase activity, for other substituted phosphate groups (GO:0016780);;	K08744|3.4e-173|zju:107420739|K08744 cardiolipin synthase (CMP-forming) [EC:2.7.8.41] | (RefSeq) cardiolipin synthase (CMP-forming), mitochondrial isoform X1	[I]	Lipid transport and metabolism	CDP-alcohol phosphatidyltransferase	Cardiolipin synthase (CMP-forming), mitochondrial OS=Arabidopsis thaliana OX=3702 GN=CLS PE=1 SV=1	Cardiolipin synthase OS=Morus notabilis OX=981085 GN=L484_012871 PE=3 SV=1	I	Lipid transport and metabolism	cardiolipin synthase (CMP-forming), mitochondrial isoform X1 [Ziziphus jujuba]
BMK_Unigene_114123	--	--	Molecular Function: nucleic acid binding (GO:0003676);; Molecular Function: RNA binding (GO:0003723);; Molecular Function: helicase activity (GO:0004386);; Molecular Function: ATP binding (GO:0005524);; Cellular Component: nucleus (GO:0005634);; Molecular Function: zinc ion binding (GO:0008270);;	--	--	--	GUCT (NUC152) domain;; Zinc knuckle	--	--	--	--	--
BMK_Unigene_141714	--	--	Molecular Function: peroxidase activity (GO:0004601);; Cellular Component: extracellular region (GO:0005576);; Biological Process: response to oxidative stress (GO:0006979);; Molecular Function: heme binding (GO:0020037);; Biological Process: hydrogen peroxide catabolic process (GO:0042744);; Molecular Function: metal ion binding (GO:0046872);;	K00430|4.3e-152|jre:109007603|K00430 peroxidase [EC:1.11.1.7] | (RefSeq) peroxidase 11-like	--	--	Peroxidase	Peroxidase 11 OS=Arabidopsis thaliana OX=3702 GN=PER11 PE=1 SV=1	Peroxidase OS=Trema orientale OX=63057 GN=TorRG33x02_322420 PE=3 SV=1	Q	Secondary metabolites biosynthesis, transport and catabolism	hypothetical protein FNV43_RR25723 [Rhamnella rubrinervis]
BMK_Unigene_142957	--	--	Molecular Function: ubiquitin protein ligase activity (GO:0061630);;	K11982|6.7e-185|zju:107410461|K11982 E3 ubiquitin-protein ligase RNF115/126 [EC:2.3.2.27] | (RefSeq) E3 ubiquitin-protein ligase RZF1-like	[O]	Posttranslational modification, protein turnover, chaperones	Ring finger domain;; zinc-ribbon;; Zinc finger, C3HC4 type (RING finger);; RING-H2 zinc finger domain;; RING-like zinc finger;; RING-type zinc-finger;; Zinc finger, C3HC4 type (RING finger)	E3 ubiquitin-protein ligase RZF1 OS=Arabidopsis thaliana OX=3702 GN=RZF1 PE=1 SV=1	RING-type E3 ubiquitin transferase OS=Parasponia andersonii OX=3476 GN=PanWU01x14_161330 PE=4 SV=1	O	Posttranslational modification, protein turnover, chaperones	E3 ubiquitin-protein ligase RZF1-like [Ziziphus jujuba]
BMK_Unigene_153749	--	--	Cellular Component: exocyst (GO:0000145);; Biological Process: exocytosis (GO:0006887);; Biological Process: Golgi to plasma membrane transport (GO:0006893);;	K19984|0.0e+00|pmum:103332065|K19984 exocyst complex component 5 | (RefSeq) exocyst complex component SEC10 isoform X1	--	--	Exocyst complex component Sec10	Exocyst complex component SEC10b OS=Arabidopsis thaliana OX=3702 GN=SEC10b PE=1 SV=1	Uncharacterized protein OS=Prunus persica OX=3760 GN=PRUPE_2G177200 PE=3 SV=1	U	Intracellular trafficking, secretion, and vesicular transport	hypothetical protein FNV43_RR15495 [Rhamnella rubrinervis]
BMK_Unigene_083134	--	--	Cellular Component: nuclear pore (GO:0005643);; Biological Process: protein transport (GO:0015031);; Cellular Component: membrane (GO:0016020);; Molecular Function: structural constituent of nuclear pore (GO:0017056);; Biological Process: mRNA transport (GO:0051028);;	K14309|1.3e-290|zju:107431624|K14309 nuclear pore complex protein Nup93 | (RefSeq) nuclear pore complex protein NUP93A-like	[D]	Cell cycle control, cell division, chromosome partitioning	Nup93/Nic96;; Nup93/Nic96;; Mitochondrial glycoprotein	Nuclear pore complex protein NUP93A OS=Arabidopsis thaliana OX=3702 GN=NUP93A PE=1 SV=2	Nuclear pore protein OS=Prunus yedoensis var. nudiflora OX=2094558 GN=Pyn_37624 PE=3 SV=1	D	Cell cycle control, cell division, chromosome partitioning	nuclear pore complex protein NUP93A-like [Ziziphus jujuba]
BMK_Unigene_152413	[S]	Function unknown	Cellular Component: integral component of membrane (GO:0016021);;	--	--	--	Protein of unknown function (DUF502)	Protein CONTINUOUS VASCULAR RING 1 OS=Arabidopsis thaliana OX=3702 GN=COV1 PE=1 SV=2	Protein LIKE COV OS=Parasponia andersonii OX=3476 GN=PanWU01x14_363070 PE=4 SV=1	S	Function unknown	protein LIKE COV 2 [Morus notabilis]
BMK_Unigene_154511	--	--	Cellular Component: signal peptidase complex (GO:0005787);; Biological Process: signal peptide processing (GO:0006465);; Molecular Function: peptidase activity (GO:0008233);; Cellular Component: integral component of membrane (GO:0016021);; Biological Process: protein targeting to ER (GO:0045047);;	K12948|7.7e-16|zju:107423279|K12948 signal peptidase complex subunit 3 [EC:3.4.-.-] | (RefSeq) signal peptidase complex subunit 3B-like isoform X1	[U]	Intracellular trafficking, secretion, and vesicular transport	--	Signal peptidase complex subunit 3B OS=Arabidopsis thaliana OX=3702 GN=At5g27430 PE=2 SV=1	Signal peptidase complex subunit 3 OS=Ananas comosus OX=4615 GN=ACMD2_16848 PE=3 SV=1	U	Intracellular trafficking, secretion, and vesicular transport	signal peptidase complex subunit 3B-like isoform X1 [Ziziphus jujuba]
BMK_Unigene_143593	--	--	Cellular Component: endoplasmic reticulum (GO:0005783);; Cellular Component: Golgi apparatus (GO:0005794);; Cellular Component: plasma membrane (GO:0005886);; Cellular Component: integral component of membrane (GO:0016021);; Biological Process: vesicle-mediated transport (GO:0016192);;	K08517|5.6e-90|zju:107434724|K08517 vesicle transport protein SEC22 | (RefSeq) 25.3 kDa vesicle transport protein	[U]	Intracellular trafficking, secretion, and vesicular transport	Regulated-SNARE-like domain	25.3 kDa vesicle transport protein OS=Arabidopsis thaliana OX=3702 GN=SEC22 PE=2 SV=1	PREDICTED: 25 3 kDa vesicle transport OS=Prunus dulcis OX=3755 GN=ALMOND_2B005254 PE=3 SV=1	U	Intracellular trafficking, secretion, and vesicular transport	PREDICTED: 25 3 kDa vesicle transport [Prunus dulcis]
BMK_Unigene_156760	[R]	General function prediction only	Cellular Component: cellular_component (GO:0005575);; Cellular Component: obsolete cell (GO:0005623);; Cellular Component: plasma membrane (GO:0005886);; Biological Process: response to stress (GO:0006950);; Biological Process: defense response (GO:0006952);; Biological Process: cell communication (GO:0007154);; Biological Process: signal transduction (GO:0007165);; Biological Process: biological…	K13459|1.1e-106|vvi:100246175|K13459 disease resistance protein RPS2 | (RefSeq) probable disease resistance protein At4g27220	[T]	Signal transduction mechanisms	NB-ARC domain;; Leucine rich repeat;; AAA domain;; Bacterial TniB protein	Disease resistance protein At4g27190 OS=Arabidopsis thaliana OX=3702 GN=At4g27190 PE=2 SV=1	Disease resistance protein OS=Morus notabilis OX=981085 GN=L484_002110 PE=4 SV=1	T	Signal transduction mechanisms	disease resistance protein At4g27190-like isoform X2 [Ziziphus jujuba]
BMK_Unigene_081935	--	--	--	--	--	--	--	--	--	--	--	probable disease resistance protein RPP1 [Ziziphus jujuba]
BMK_Unigene_071860	--	--	Molecular Function: UDP-glycosyltransferase activity (GO:0008194);; Molecular Function: transferase activity, transferring hexosyl groups (GO:0016758);; Cellular Component: intracellular membrane-bounded organelle (GO:0043231);;	K23452|1.0e-39|bna:106451243|K23452 UDP-glucosyltransferase 85A [EC:2.4.1.-] | (RefSeq) UDP-glycosyltransferase 85A5	[GC]	--	UDP-glucoronosyl and UDP-glucosyl transferase	7-deoxyloganetic acid glucosyl transferase OS=Catharanthus roseus OX=4058 GN=7DLGT PE=1 SV=1	Glycosyltransferase OS=Prunus persica OX=3760 GN=PRUPE_6G266600 PE=3 SV=1	G	Carbohydrate transport and metabolism	7-deoxyloganetic acid glucosyltransferase-like [Ziziphus jujuba]
BMK_Unigene_004119	--	--	Molecular Function: Rho GDP-dissociation inhibitor activity (GO:0005094);; Cellular Component: cytoplasm (GO:0005737);;	K12462|1.6e-92|zju:107422178|K12462 Rho GDP-dissociation inhibitor | (RefSeq) rho GDP-dissociation inhibitor 1-like	[T]	Signal transduction mechanisms	RHO protein GDP dissociation inhibitor;; Protein of unknown function (DUF2488)	Rho GDP-dissociation inhibitor 1 OS=Arabidopsis thaliana OX=3702 GN=GDI1 PE=1 SV=1	Uncharacterized protein OS=Lupinus angustifolius OX=3871 GN=TanjilG_07614 PE=3 SV=1	T	Signal transduction mechanisms	uncharacterized protein LOC107403531 isoform X1 [Ziziphus jujuba]
BMK_Unigene_072736	--	--	--	--	--	--	--	--	Uncharacterized protein OS=Prunus persica OX=3760 GN=PRUPE_5G117500 PE=4 SV=1	--	--	uncharacterized protein LOC112493417 [Ziziphus jujuba]
BMK_Unigene_064717	--	--	--	--	--	--	--	--	Uncharacterized protein OS=Morus notabilis OX=981085 GN=L484_005228 PE=4 SV=1	--	--	hypothetical protein FNV43_RR10389 [Rhamnella rubrinervis]
BMK_Unigene_257988	[J]	Translation, ribosomal structure and biogenesis	Cellular Component: cellular_component (GO:0005575);; Cellular Component: intracellular (GO:0005622);; Cellular Component: obsolete cell (GO:0005623);; Cellular Component: nucleus (GO:0005634);; Biological Process: nucleobase-containing compound metabolic process (GO:0006139);; Biological Process: RNA processing (GO:0006396);; Biological Process: cellular aromatic compound metabolic process (GO:0…	K14403|1.4e-40|csat:104714432|K14403 cleavage and polyadenylation specificity factor subunit 3 [EC:3.1.27.-] | (RefSeq) cleavage and polyadenylation specificity factor subunit 3-I	[A]	RNA processing and modification	Beta-Casp domain	Cleavage and polyadenylation specificity factor subunit 3-I OS=Arabidopsis thaliana OX=3702 GN=CPSF73-I PE=1 SV=1	Cleavage and polyadenylation specificity factor subunit 3-I OS=Gracilariopsis chorda OX=448386 GN=BWQ96_01689 PE=4 SV=1	A	RNA processing and modification	cleavage and polyadenylation specificity factor subunit 3-like [Rhodamnia argentea]
BMK_Unigene_145862	[E]	Amino acid transport and metabolism	Molecular Function: nucleotide binding (GO:0000166);; Biological Process: cellular amino acid metabolic process (GO:0006520);; Molecular Function: oxidoreductase activity (GO:0016491);; Molecular Function: oxidoreductase activity, acting on the CH-NH2 group of donors, NAD or NADP as acceptor (GO:0016639);; Biological Process: oxidation-reduction process (GO:0055114);;	K00261|6.0e-112|ppp:112280836|K00261 glutamate dehydrogenase (NAD(P)+) [EC:1.4.1.3] | (RefSeq) glutamate dehydrogenase, mitochondrial-like isoform X1	[E]	Amino acid transport and metabolism	Glu/Leu/Phe/Val dehydrogenase, dimerisation domain;; Glutamate/Leucine/Phenylalanine/Valine dehydrogenase	Probable glutamate dehydrogenase 3 OS=Arabidopsis thaliana OX=3702 GN=GSH3 PE=3 SV=1	Glutamate dehydrogenase OS=Guillardia theta (strain CCMP2712) OX=905079 GN=GUITHDRAFT_156771 PE=3 SV=1	E	Amino acid transport and metabolism	glutamate dehydrogenase, mitochondrial-like [Rhodamnia argentea]
BMK_Unigene_140036	--	--	Molecular Function: GTPase activity (GO:0003924);; Molecular Function: structural constituent of cytoskeleton (GO:0005200);; Molecular Function: GTP binding (GO:0005525);; Cellular Component: cytoplasm (GO:0005737);; Cellular Component: microtubule (GO:0005874);; Biological Process: microtubule-based process (GO:0007017);;	K07374|8.7e-157|zma:542248|K07374 tubulin alpha | (RefSeq) tua5; tubulin alpha-5 chain	[Z]	Cytoskeleton	Tubulin/FtsZ family, GTPase domain;; Tubulin C-terminal domain	Tubulin alpha-5 chain OS=Zea mays OX=4577 GN=TUBA5 PE=2 SV=1	Tubulin alpha chain OS=Noccaea caerulescens OX=107243 GN=GA_TR15575_c1_g1_i1_g.47587 PE=3 SV=1	Z	Cytoskeleton	tubulin alpha-5 chain [Zea mays]
BMK_Unigene_143925	[HI]	--	Molecular Function: acetyl-CoA carboxylase activity (GO:0003989);; Biological Process: fatty acid biosynthetic process (GO:0006633);; Cellular Component: acetyl-CoA carboxylase complex (GO:0009317);; Cellular Component: chloroplast (GO:0009507);;	K02160|1.6e-120|zju:107412493|K02160 acetyl-CoA carboxylase biotin carboxyl carrier protein | (RefSeq) biotin carboxyl carrier protein of acetyl-CoA carboxylase 1, chloroplastic	--	--	Biotin-requiring enzyme;; Biotin-lipoyl like	Biotin carboxyl carrier protein of acetyl-CoA carboxylase 1, chloroplastic OS=Arabidopsis thaliana OX=3702 GN=BCCP1 PE=1 SV=2	Biotin carboxyl carrier protein of acetyl-CoA carboxylase OS=Prunus persica OX=3760 GN=PRUPE_7G000300 PE=4 SV=1	C	Energy production and conversion	biotin carboxyl carrier protein of acetyl-CoA carboxylase 1, chloroplastic [Ziziphus jujuba]
BMK_Unigene_112060	--	--	Cellular Component: extracellular region (GO:0005576);; Biological Process: lipid transport (GO:0006869);; Molecular Function: lipid binding (GO:0008289);; Biological Process: lipoprotein metabolic process (GO:0042157);;	--	--	--	Apolipoprotein A1/A4/E domain	--	--	--	--	--
BMK_Unigene_018638	--	--	Molecular Function: molecular_function (GO:0003674);; Molecular Function: structural constituent of ribosome (GO:0003735);; Molecular Function: structural molecule activity (GO:0005198);; Cellular Component: cellular_component (GO:0005575);; Cellular Component: cell wall (GO:0005618);; Cellular Component: intracellular (GO:0005622);; Cellular Component: obsolete cell (GO:0005623);; Cellular Compo…	K02903|3.0e-09|dct:110107762|K02903 large subunit ribosomal protein L28e | (RefSeq) 60S ribosomal protein L28-2	--	--	Ribosomal L28e protein family	--	60S ribosomal protein L28 OS=Anthurium amnicola OX=1678845 GN=Rpl28_1 PE=3 SV=1	J	Translation, ribosomal structure and biogenesis	ribosomal protein L28e [Mortierella verticillata NRRL 6337]
BMK_Unigene_001190	--	--	Biological Process: regulation of division septum assembly (GO:0032955);; Biological Process: cell division (GO:0051301);;	--	--	--	Domain of unknown function (DUF3598)	--	DUF3598 domain-containing protein OS=Prunus persica OX=3760 GN=PRUPE_3G262000 PE=3 SV=1	S	Function unknown	uncharacterized protein LOC115701459 isoform X2 [Cannabis sativa]
BMK_Unigene_149649	[J]	Translation, ribosomal structure and biogenesis	Molecular Function: nucleic acid binding (GO:0003676);; Molecular Function: lysine-tRNA ligase activity (GO:0004824);; Molecular Function: ATP binding (GO:0005524);; Cellular Component: cytoplasm (GO:0005737);; Biological Process: lysyl-tRNA aminoacylation (GO:0006430);;	K04567|3.0e-147|zju:107415008|K04567 lysyl-tRNA synthetase, class II [EC:6.1.1.6] | (RefSeq) lysine--tRNA ligase, chloroplastic/mitochondrial	[J]	Translation, ribosomal structure and biogenesis	OB-fold nucleic acid binding domain;; tRNA synthetases class II (D, K and N)	Lysine--tRNA ligase, chloroplastic/mitochondrial OS=Arabidopsis thaliana OX=3702 GN=OVA5 PE=2 SV=1	Lysine--tRNA ligase (Fragment) OS=Davidia involucrata OX=16924 GN=Din_040323 PE=3 SV=1	J	Translation, ribosomal structure and biogenesis	lysine--tRNA ligase, chloroplastic/mitochondrial [Ziziphus jujuba]
BMK_Unigene_076680	--	--	Molecular Function: protein binding (GO:0005515);; Cellular Component: cellular_component (GO:0005575);; Cellular Component: intracellular (GO:0005622);; Cellular Component: obsolete cell (GO:0005623);; Cellular Component: nucleus (GO:0005634);; Cellular Component: cytoplasm (GO:0005737);; Cellular Component: organelle (GO:0043226);; Cellular Component: membrane-bounded organelle (GO:0043227);; C…	--	[S]	Function unknown	Armadillo/beta-catenin-like repeat;; HEAT repeat;; HEAT repeats;; Armadillo-like	--	PREDICTED: vacuolar 8 OS=Prunus dulcis OX=3755 GN=ALMOND_2B019698 PE=4 SV=1	S	Function unknown	hypothetical protein FNV43_RR15184 [Rhamnella rubrinervis]
BMK_Unigene_322428	--	--	Molecular Function: RNA binding (GO:0003723);;	--	--	--	RNA recognition motif. (a.k.a. RRM, RBD, or RNP domain)	--	RRM domain-containing protein OS=Arabis nemorensis OX=586526 GN=ANE_LOCUS26076 PE=4 SV=1	A	RNA processing and modification	hypothetical protein M407DRAFT_241499 [Tulasnella calospora MUT 4182]
BMK_Unigene_131306	--	--	--	--	--	--	Calcium-activated chloride channel	--	--	--	--	--
BMK_Unigene_140037	--	--	Cellular Component: integral component of membrane (GO:0016021);;	--	--	--	--	--	Uncharacterized protein OS=Populus alba OX=43335 GN=D5086_0000306780 PE=4 SV=1	--	--	uncharacterized protein LOC107423498 isoform X1 [Ziziphus jujuba]
BMK_Unigene_077690	--	--	Cellular Component: integral component of membrane (GO:0016021);; Molecular Function: transmembrane transporter activity (GO:0022857);;	K08150|7.0e-23|mesc:110602234|K08150 MFS transporter, SP family, solute carrier family 2 (myo-inositol transporter), member 13 | (RefSeq) probable inositol transporter 2	[R]	General function prediction only	--	Probable inositol transporter 2 OS=Arabidopsis thaliana OX=3702 GN=INT2 PE=1 SV=1	MFS domain-containing protein OS=Manihot esculenta OX=3983 GN=MANES_15G123900 PE=3 SV=1	U	Intracellular trafficking, secretion, and vesicular transport	hypothetical protein FNV43_RR06038 [Rhamnella rubrinervis]
BMK_Unigene_151101	[PR]	--	Molecular Function: iron ion binding (GO:0005506);; Molecular Function: chlorophyllide a oxygenase [overall] activity (GO:0010277);; Molecular Function: dioxygenase activity (GO:0051213);; Molecular Function: 2 iron, 2 sulfur cluster binding (GO:0051537);;	K13600|7.6e-187|zju:107421073|K13600 chlorophyllide a oxygenase [EC:1.14.13.122] | (RefSeq) chlorophyllide a oxygenase, chloroplastic-like	--	--	Pheophorbide a oxygenase;; Vanillate O-demethylase oxygenase C-terminal domain;; Vanillate O-demethylase oxygenase C-terminal domain	Chlorophyllide a oxygenase, chloroplastic OS=Oryza sativa subsp. japonica OX=39947 GN=CAO PE=2 SV=1	Aromatic-ring-hydroxylating dioxygenase, alpha subunit OS=Trema orientale OX=63057 GN=TorRG33x02_191600 PE=4 SV=1	P	Inorganic ion transport and metabolism	chlorophyllide a oxygenase, chloroplastic-like [Ziziphus jujuba]
BMK_Unigene_002659	[O]	Posttranslational modification, protein turnover, chaperones	Molecular Function: ATP binding (GO:0005524);; Cellular Component: cytoplasm (GO:0005737);; Biological Process: protein folding (GO:0006457);; Molecular Function: unfolded protein binding (GO:0051082);;	K09496|3.9e-36|gab:108457061|K09496 T-complex protein 1 subunit delta | (RefSeq) T-complex protein 1 subunit delta	[O]	Posttranslational modification, protein turnover, chaperones	TCP-1/cpn60 chaperonin family	T-complex protein 1 subunit delta OS=Arabidopsis thaliana OX=3702 GN=CCT4 PE=1 SV=1	T-complex protein 1 subunit delta OS=Hondaea fermentalgiana OX=2315210 GN=FCC1311_044122 PE=3 SV=1	O	Posttranslational modification, protein turnover, chaperones	T-complex protein 1 subunit delta [Hondaea fermentalgiana]
BMK_Unigene_073983	--	--	Cellular Component: nucleus (GO:0005634);; Biological Process: tRNA methylation (GO:0030488);; Biological Process: RNA (guanine-N7)-methylation (GO:0036265);;	K15443|8.9e-240|zju:107425957|K15443 tRNA (guanine-N(7)-)-methyltransferase subunit TRM82 | (RefSeq) tRNA (guanine-N(7)-)-methyltransferase non-catalytic subunit wdr4	[S]	Function unknown	WD domain, G-beta repeat;; Anaphase-promoting complex subunit 4 WD40 domain	--	tRNA (guanine-N(7)-)-methyltransferase non-catalytic subunit OS=Trema orientale OX=63057 GN=TorRG33x02_091330 PE=3 SV=1	J	Translation, ribosomal structure and biogenesis	tRNA (guanine-N(7)-)-methyltransferase non-catalytic subunit wdr4 [Ziziphus jujuba]
BMK_Unigene_078202	[HC]	--	Molecular Function: squalene monooxygenase activity (GO:0004506);; Cellular Component: integral component of membrane (GO:0016021);; Biological Process: sterol biosynthetic process (GO:0016126);; Molecular Function: flavin adenine dinucleotide binding (GO:0050660);;	K00511|2.6e-304|zju:107427482|K00511 squalene monooxygenase [EC:1.14.14.17] | (RefSeq) squalene monooxygenase-like	[I]	Lipid transport and metabolism	Squalene epoxidase;; FAD binding domain;; FAD dependent oxidoreductase;; NAD(P)-binding Rossmann-like domain;; FAD binding domain;; Glucose inhibited division protein A	Squalene monooxygenase SE1 OS=Panax ginseng OX=4054 GN=SQE1 PE=2 SV=1	Squalene monooxygenase OS=Trema orientale OX=63057 GN=TorRG33x02_207980 PE=3 SV=1	I	Lipid transport and metabolism	squalene monooxygenase-like [Ziziphus jujuba]
BMK_Unigene_082566	--	--	Molecular Function: ATP binding (GO:0005524);; Molecular Function: 1-phosphatidylinositol-3-kinase activity (GO:0016303);; Biological Process: phosphatidylinositol-mediated signaling (GO:0048015);;	K00914|0.0e+00|zju:107428711|K00914 phosphatidylinositol 3-kinase [EC:2.7.1.137] | (RefSeq) phosphatidylinositol 3-kinase, root isoform isoform X1	[TU]	--	Phosphoinositide 3-kinase family, accessory domain (PIK domain);; Phosphatidylinositol 3- and 4-kinase;; Phosphoinositide 3-kinase C2	Phosphatidylinositol 3-kinase, root isoform OS=Glycine max OX=3847 PE=2 SV=1	Phosphatidylinositol 3-kinase OS=Prunus persica OX=3760 GN=PRUPE_1G251400 PE=3 SV=1	T	Signal transduction mechanisms	phosphatidylinositol 3-kinase, root isoform isoform X2 [Ziziphus jujuba]
BMK_Unigene_156321	--	--	Biological Process: signal transduction (GO:0007165);;	--	--	--	Putative nuclear localisation signal;; Ethylene-responsive binding factor-associated repression;; Tify domain binding domain	Ninja-family protein AFP3 OS=Arabidopsis thaliana OX=3702 GN=AFP3 PE=1 SV=1	Ninja family OS=Trema orientale OX=63057 GN=TorRG33x02_248810 PE=3 SV=1	S	Function unknown	ninja-family protein AFP3-like isoform X2 [Ziziphus jujuba]
BMK_Unigene_125612	--	--	--	--	--	--	COMM domain	--	COMM domain-containing protein OS=Guillardia theta (strain CCMP2712) OX=905079 GN=GUITHDRAFT_151586 PE=4 SV=1	--	--	COMM domain-containing protein 7 [Capsaspora owczarzaki ATCC 30864]
BMK_Unigene_133171	--	--	Biological Process: regulation of DNA endoreduplication (GO:0032875);;	--	--	--	--	Cyclin-dependent protein kinase inhibitor SMR6 OS=Arabidopsis thaliana OX=3702 GN=SMR6 PE=1 SV=1	Uncharacterized protein OS=Manihot esculenta OX=3983 GN=MANES_15G150600 PE=4 SV=1	S	Function unknown	cyclin-dependent protein kinase inhibitor SMR6 [Ziziphus jujuba]
BMK_Unigene_156331	--	--	--	K20296|4.4e-207|zju:107406057|K20296 vacuolar protein sorting-associated protein 51 | (RefSeq) vacuolar protein sorting-associated protein 51 homolog	--	--	Domain of unknown function (DUF4378);; Protein of unknown function (DUF3741);; DUF761-associated sequence motif	Vacuolar protein sorting-associated protein 51 homolog OS=Arabidopsis thaliana OX=3702 GN=VPS51 PE=1 SV=1	Afadin OS=Trema orientale OX=63057 GN=TorRG33x02_014180 PE=4 SV=1	S	Function unknown	uncharacterized protein LOC107432827 isoform X1 [Ziziphus jujuba]
BMK_Unigene_084206	[QV]	--	Biological Process: ribosomal large subunit export from nucleus (GO:0000055);; Biological Process: ribosomal small subunit export from nucleus (GO:0000056);; Molecular Function: structural constituent of nuclear pore (GO:0017056);;	K14318|0.0e+00|zju:107413861|K14318 nuclear pore complex protein Nup88 | (RefSeq) nuclear pore complex protein NUP88-like isoform X2	[YU]	--	Nuclear pore component;; Cytochrome P450	Nuclear pore complex protein NUP88 OS=Arabidopsis thaliana OX=3702 GN=NUP88 PE=1 SV=1	Nucleoporin OS=Trema orientale OX=63057 GN=TorRG33x02_176640 PE=4 SV=1	--	--	nuclear pore complex protein NUP88-like isoform X2 [Ziziphus jujuba]
BMK_Unigene_156469	[HR]	--	Molecular Function: protein binding (GO:0005515);; Molecular Function: ADP binding (GO:0043531);;	K13459|2.9e-80|mdm:103422584|K13459 disease resistance protein RPS2 | (RefSeq) LOW QUALITY PROTEIN: disease resistance protein At4g27190-like	--	--	NB-ARC domain;; WD domain, G-beta repeat;; Anaphase-promoting complex subunit 4 WD40 domain;; Uncharacterised protein domain (DUF2415);; Alpha/beta hydrolase family;; alpha/beta hydrolase fold;; Serine aminopeptidase, S33	Putative methylesterase 13, chloroplastic OS=Arabidopsis thaliana OX=3702 GN=MES13 PE=2 SV=1	Uncharacterized WD repeat-containing protein OS=Morus notabilis OX=981085 GN=L484_017967 PE=4 SV=1	S	Function unknown	hypothetical protein FNV43_RR08025 [Rhamnella rubrinervis]
BMK_Unigene_156590	--	--	Molecular Function: RNA binding (GO:0003723);;	--	--	--	APO RNA-binding	APO protein 3, mitochondrial OS=Arabidopsis thaliana OX=3702 GN=APO3 PE=2 SV=1	APO domain containing protein OS=Trema orientale OX=63057 GN=TorRG33x02_075360 PE=4 SV=1	S	Function unknown	APO protein 3, mitochondrial-like [Ziziphus jujuba]
BMK_Unigene_194678	--	--	--	--	[T]	Signal transduction mechanisms	--	--	--	--	--	--
BMK_Unigene_082182	[O]	Posttranslational modification, protein turnover, chaperones	Molecular Function: serine-type endopeptidase activity (GO:0004252);;	K15333|6.1e-129|nsy:104224633|K15333 tRNA guanosine-2'-O-methyltransferase [EC:2.1.1.34] | (RefSeq) uncharacterized protein LOC104224633	--	--	Subtilase family;; Peptidase inhibitor I9;; Subtilase family;; Fibronectin type-III domain;; Fn3-like domain	Subtilisin-like protease SBT2.5 OS=Arabidopsis thaliana OX=3702 GN=SBT2.5 PE=2 SV=1	PREDICTED: subtilisin OS=Prunus dulcis OX=3755 GN=ALMOND_2B008187 PE=3 SV=1	O	Posttranslational modification, protein turnover, chaperones	hypothetical protein FNV43_RR03166 [Rhamnella rubrinervis]
BMK_Unigene_074535	[R]	General function prediction only	Molecular Function: molecular_function (GO:0003674);; Molecular Function: catalytic activity (GO:0003824);; Molecular Function: protein kinase activity (GO:0004672);; Molecular Function: protein serine/threonine kinase activity (GO:0004674);; Molecular Function: binding (GO:0005488);; Molecular Function: protein binding (GO:0005515);; Molecular Function: calmodulin binding (GO:0005516);; Molecula…	K00924|1.2e-28|mus:103990921|K00924 kinase [EC:2.7.1.-] | (RefSeq) receptor protein kinase TMK1-like	--	--	Protein tyrosine and serine/threonine kinase;; Protein tyrosine and serine/threonine kinase;; Protein kinase domain	G-type lectin S-receptor-like serine/threonine-protein kinase At1g61500 OS=Arabidopsis thaliana OX=3702 GN=At1g61500 PE=2 SV=2	Receptor-like serine/threonine-protein kinase OS=Parasponia andersonii OX=3476 GN=PanWU01x14_230740 PE=3 SV=1	T	Signal transduction mechanisms	G-type lectin S-receptor-like serine/threonine-protein kinase At1g61440 [Ziziphus jujuba]
BMK_Unigene_077548	[R]	General function prediction only	Cellular Component: integral component of membrane (GO:0016021);;	K02717|9.2e-74|osa:4348816|K02717 photosystem II oxygen-evolving enhancer protein 2 | (RefSeq) uncharacterized protein LOC4348816 isoform X1	--	--	Tetratricopeptide repeat;; Tetratricopeptide repeat;; Tetratricopeptide repeat;; Tetratricopeptide repeat;; Tetratricopeptide repeat;; TPR repeat;; Tetratricopeptide repeat;; Tetratricopeptide repeat;; Tetratricopeptide repeat	Tetratricopeptide repeat domain-containing protein PYG7, chloroplastic OS=Arabidopsis thaliana OX=3702 GN=PYG7 PE=1 SV=1	Uncharacterized protein ycf37 OS=Morus notabilis OX=981085 GN=L484_016446 PE=4 SV=1	S	Function unknown	hypothetical protein FNV43_RR10638 [Rhamnella rubrinervis]
BMK_Unigene_141583	--	--	Cellular Component: membrane (GO:0016020);; Molecular Function: transmembrane transporter activity (GO:0022857);; Biological Process: transmembrane transport (GO:0055085);;	K14638|1.7e-155|zju:107420699|K14638 solute carrier family 15 (peptide/histidine transporter), member 3/4 | (RefSeq) protein NRT1/ PTR FAMILY 1.2-like isoform X1	[E]	Amino acid transport and metabolism	POT family;; POT family	Protein NRT1/ PTR FAMILY 1.2 OS=Arabidopsis thaliana OX=3702 GN=NPF1.2 PE=1 SV=1	Protein NRT1/ PTR FAMILY 1.2 OS=Morella rubra OX=262757 GN=CJ030_MR8G014178 PE=3 SV=1	E	Amino acid transport and metabolism	protein NRT1/ PTR FAMILY 1.2-like [Ziziphus jujuba]
BMK_Unigene_139801	--	--	Molecular Function: ubiquitin-protein transferase activity (GO:0004842);;	K10260|5.8e-06|csl:COCSUDRAFT_23114|K10260 F-box and WD-40 domain protein 7 | (RefSeq) WD40 repeat-like protein	--	--	U-box domain	U-box domain-containing protein 41 OS=Arabidopsis thaliana OX=3702 GN=PUB41 PE=2 SV=1	RING-type E3 ubiquitin transferase OS=Trema orientale OX=63057 GN=TorRG33x02_243990 PE=4 SV=1	O	Posttranslational modification, protein turnover, chaperones	U-box domain-containing protein 40 [Ziziphus jujuba]
BMK_Unigene_079528	--	--	Molecular Function: nucleic acid binding (GO:0003676);;	--	--	--	--	Protein PLASTID TRANSCRIPTIONALLY ACTIVE 10 OS=Arabidopsis thaliana OX=3702 GN=PTAC10 PE=1 SV=1	S1 motif domain-containing protein OS=Malus domestica OX=3750 GN=DVH24_039750 PE=4 SV=1	S	Function unknown	protein PLASTID TRANSCRIPTIONALLY ACTIVE 10 isoform X1 [Ziziphus jujuba]
BMK_Unigene_152776	[T]	Signal transduction mechanisms	Molecular Function: protein serine/threonine kinase activity (GO:0004674);; Molecular Function: ATP binding (GO:0005524);; Cellular Component: integral component of membrane (GO:0016021);;	K00924|0.0e+00|zju:107416173|K00924 kinase [EC:2.7.1.-] | (RefSeq) receptor protein kinase TMK1	--	--	Protein kinase domain;; Protein tyrosine and serine/threonine kinase;; Leucine rich repeat;; Leucine Rich repeats (2 copies);; Leucine rich repeat N-terminal domain;; Leucine Rich Repeat	Receptor protein kinase TMK1 OS=Arabidopsis thaliana OX=3702 GN=TMK1 PE=1 SV=1	Receptor protein kinase TMK1 OS=Prunus yedoensis var. nudiflora OX=2094558 GN=Pyn_06835 PE=3 SV=1	T	Signal transduction mechanisms	receptor protein kinase TMK1 [Ziziphus jujuba]
BMK_Unigene_075643	--	--	Cellular Component: ER membrane protein complex (GO:0072546);;	K23569|1.7e-110|zju:107434010|K23569 ER membrane protein complex subunit 8/9 | (RefSeq) ER membrane protein complex subunit 8/9 homolog	[R]	General function prediction only	Uncharacterised protein family (UPF0172)	ER membrane protein complex subunit 8/9 homolog OS=Arabidopsis thaliana OX=3702 GN=EMB2731 PE=2 SV=1	ER membrane protein complex subunit OS=Trema orientale OX=63057 GN=TorRG33x02_178980 PE=3 SV=1	S	Function unknown	ER membrane protein complex subunit 8/9 homolog [Ziziphus jujuba]
BMK_Unigene_211684	--	--	--	--	--	--	RNA polymerase I specific transcription initiation factor RRN3	--	--	--	--	--
BMK_Unigene_078949	[S]	Function unknown	Cellular Component: integral component of membrane (GO:0016021);;	K00521|6.0e-70|eus:EUTSA_v10003544mg|K00521 ferric-chelate reductase [EC:1.16.1.7] | (RefSeq) hypothetical protein	--	--	Protein of unknown function (DUF819);; Protein of unknown function (DUF819)	--	Uncharacterized protein OS=Jatropha curcas OX=180498 GN=JCGZ_26069 PE=4 SV=1	S	Function unknown	uncharacterized protein LOC107406530 isoform X1 [Ziziphus jujuba]
BMK_Unigene_319616	--	--	Biological Process: inactivation of MAPK activity (GO:0000188);; Biological Process: formation of primary germ layer (GO:0001704);; Biological Process: endoderm formation (GO:0001706);; Biological Process: regulation of protein phosphorylation (GO:0001932);; Biological Process: negative regulation of protein phosphorylation (GO:0001933);; Molecular Function: molecular_function (GO:0003674);; Mole…	K04459|2.4e-23|gsl:Gasu_49380|K04459 dual specificity MAP kinase phosphatase [EC:3.1.3.16 3.1.3.48] | (RefSeq) dual specificity phosphatase	[V]	Defense mechanisms	Dual specificity phosphatase, catalytic domain;; Rhodanese-like domain;; Protein-tyrosine phosphatase	Protein-tyrosine-phosphatase MKP1 OS=Arabidopsis thaliana OX=3702 GN=MKP1 PE=1 SV=1	Uncharacterized protein OS=Araucaria cunninghamii OX=56994 PE=4 SV=1	V	Defense mechanisms	dual specificity protein phosphatase 7 [Capsaspora owczarzaki ATCC 30864]
BMK_Unigene_156145	--	--	Molecular Function: metal ion binding (GO:0046872);;	--	[R]	General function prediction only	Zinc finger C-x8-C-x5-C-x3-H type (and similar)	Zinc finger CCCH domain-containing protein 7 OS=Arabidopsis thaliana OX=3702 GN=At1g21570 PE=1 SV=1	Zinc finger, CCCH-type OS=Trema orientale OX=63057 GN=TorRG33x02_126070 PE=4 SV=1	S	Function unknown	uncharacterized protein LOC107421110 [Ziziphus jujuba]
BMK_Unigene_146801	--	--	Molecular Function: GTP binding (GO:0005525);; Cellular Component: nucleus (GO:0005634);; Biological Process: ribosome biogenesis (GO:0042254);;	K14569|1.9e-277|zju:107435087|K14569 ribosome biogenesis protein BMS1 | (RefSeq) ribosome biogenesis protein BMS1 homolog	[J]	Translation, ribosomal structure and biogenesis	AARP2CN (NUC121) domain	--	PREDICTED: ribosome biogenesis OS=Prunus dulcis OX=3755 GN=ALMOND_2B002500 PE=4 SV=1	J	Translation, ribosomal structure and biogenesis	ribosome biogenesis protein BMS1 homolog [Ziziphus jujuba]
BMK_Unigene_301380	--	--	Cellular Component: host cell nucleus (GO:0042025);;	K21777|4.0e-24|cqi:110701006|K21777 G2/mitotic-specific cyclin-B, other | (RefSeq) G2/mitotic-specific cyclin S13-7-like isoform X1	[D]	Cell cycle control, cell division, chromosome partitioning	Cyclin, N-terminal domain	Cyclin-B2-1 OS=Oryza sativa subsp. indica OX=39946 GN=CYCB2-1 PE=1 SV=1	Cyclin N-terminal domain-containing protein (Fragment) OS=Genlisea aurea OX=192259 GN=M569_12366 PE=3 SV=1	D	Cell cycle control, cell division, chromosome partitioning	hypothetical protein M407DRAFT_22076 [Tulasnella calospora MUT 4182]
BMK_Unigene_141262	[T]	Signal transduction mechanisms	Molecular Function: protein kinase activity (GO:0004672);; Molecular Function: ATP binding (GO:0005524);;	K13415|5.3e-80|han:110929858|K13415 protein brassinosteroid insensitive 1 [EC:2.7.10.1 2.7.11.1] | (RefSeq) systemin receptor SR160-like	--	--	Protein kinase domain;; Protein tyrosine and serine/threonine kinase	MDIS1-interacting receptor like kinase 2 OS=Arabidopsis thaliana OX=3702 GN=MIK2 PE=1 SV=3	Protein kinase domain-containing protein OS=Fagus sylvatica OX=28930 GN=FSB_LOCUS8621 PE=4 SV=1	T	Signal transduction mechanisms	MDIS1-interacting receptor like kinase 2-like [Ziziphus jujuba]
BMK_Unigene_075673	--	--	--	--	--	--	--	--	--	--	--	TMV resistance protein N-like [Ziziphus jujuba]
BMK_Unigene_112074	--	--	Molecular Function: structural constituent of ribosome (GO:0003735);; Cellular Component: ribosome (GO:0005840);; Biological Process: translation (GO:0006412);;	K02971|2.9e-22|qsu:112002446|K02971 small subunit ribosomal protein S21e | (RefSeq) 40S ribosomal protein S21	[J]	Translation, ribosomal structure and biogenesis	Ribosomal protein S21e	40S ribosomal protein S21 OS=Oryza sativa subsp. japonica OX=39947 GN=RPS21 PE=3 SV=1	40S ribosomal protein S21 (Fragment) OS=Anthurium amnicola OX=1678845 GN=RPS21_2 PE=3 SV=1	J	Translation, ribosomal structure and biogenesis	hypothetical protein M407DRAFT_241420 [Tulasnella calospora MUT 4182]
BMK_Unigene_296879	--	--	Molecular Function: calcium ion binding (GO:0005509);;	--	--	--	Calsequestrin	--	--	--	--	--
BMK_Unigene_153075	--	--	Molecular Function: serine-type peptidase activity (GO:0008236);;	K01285|1.5e-306|zju:107425039|K01285 lysosomal Pro-X carboxypeptidase [EC:3.4.16.2] | (RefSeq) lysosomal Pro-X carboxypeptidase-like	[OR]	--	Serine carboxypeptidase S28	--	PREDICTED: lysosomal OS=Prunus dulcis OX=3755 GN=ALMOND_2B021125 PE=3 SV=1	O	Posttranslational modification, protein turnover, chaperones	lysosomal Pro-X carboxypeptidase-like [Ziziphus jujuba]
BMK_Unigene_156100	--	--	Molecular Function: metal ion binding (GO:0046872);;	K22909|7.9e-22|atr:18448339|K22909 zinc finger CCCH domain-containing protein 13 | (RefSeq) zinc finger CCCH domain-containing protein 38 isoform X1	--	--	--	Zinc finger CCCH domain-containing protein 55 OS=Oryza sativa subsp. japonica OX=39947 GN=Os08g0135800 PE=2 SV=1	C3H1-type domain-containing protein OS=Carpinus fangiana OX=176857 GN=FH972_019353 PE=4 SV=1	S	Function unknown	serine/arginine repetitive matrix protein 2-like [Ziziphus jujuba]
BMK_Unigene_162453	--	--	Cellular Component: nucleus (GO:0005634);; Biological Process: regulation of transcription, DNA-templated (GO:0006355);; Biological Process: auxin-activated signaling pathway (GO:0009734);;	K14484|2.6e-75|ath:AT2G22670|K14484 auxin-responsive protein IAA | (RefSeq) IAA8; indoleacetic acid-induced protein 8	--	--	--	Auxin-responsive protein IAA8 OS=Arabidopsis thaliana OX=3702 GN=IAA8 PE=1 SV=1	Auxin-responsive protein OS=Arabidopsis thaliana OX=3702 GN=IAA8 PE=1 SV=1	K	Transcription	indole-3-acetic acid inducible 8, partial [Arabidopsis thaliana]
BMK_Unigene_083799	[G]	Carbohydrate transport and metabolism	Biological Process: carbohydrate transport (GO:0008643);; Cellular Component: integral component of membrane (GO:0016021);; Molecular Function: transmembrane transporter activity (GO:0022857);;	K24193|3.4e-293|zju:107431886|K24193 MFS transporter, SP family, sugar:H+ symporter | (RefSeq) sugar transport protein 14 isoform X1	[R]	General function prediction only	Sugar (and other) transporter;; Major Facilitator Superfamily;; CRS1 / YhbY (CRM) domain;; Exostosin family	Sugar transport protein 14 OS=Arabidopsis thaliana OX=3702 GN=STP14 PE=2 SV=2	Sugar transport protein 14 OS=Morus notabilis OX=981085 GN=L484_010910 PE=3 SV=1	U	Intracellular trafficking, secretion, and vesicular transport	sugar transport protein 14 isoform X1 [Ziziphus jujuba]
BMK_Unigene_148957	[O]	Posttranslational modification, protein turnover, chaperones	Molecular Function: ATP binding (GO:0005524);; Cellular Component: integral component of membrane (GO:0016021);;	K13525|8.3e-16|lja:Lj3g3v3067920.1|K13525 transitional endoplasmic reticulum ATPase | (RefSeq) Lj3g3v3067920.1; -	[O]	Posttranslational modification, protein turnover, chaperones	AAA+ lid domain;; ATPase family associated with various cellular activities (AAA);; ATPase family associated with various cellular activities (AAA);; ATPase family associated with various cellular activities (AAA)	Cell division control protein 48 homolog B OS=Arabidopsis thaliana OX=3702 GN=CDC48B PE=2 SV=1	Uncharacterized protein OS=Jatropha curcas OX=180498 GN=JCGZ_23815 PE=3 SV=1	O	Posttranslational modification, protein turnover, chaperones	cell division control protein 48 homolog B isoform X1 [Ziziphus jujuba]
BMK_Unigene_132078	--	--	Cellular Component: integral component of membrane (GO:0016021);;	--	--	--	--	--	Uncharacterized protein OS=Arabidopsis thaliana OX=3702 PE=2 SV=1	--	--	hypothetical protein [Arabidopsis thaliana]
BMK_Unigene_172873	[J]	Translation, ribosomal structure and biogenesis	Molecular Function: translation initiation factor activity (GO:0003743);; Molecular Function: GTPase activity (GO:0003924);; Molecular Function: GTP binding (GO:0005525);;	K03242|3.6e-48|cvr:CHLNCDRAFT_31418|K03242 translation initiation factor 2 subunit 3 | (RefSeq) hypothetical protein	[J]	Translation, ribosomal structure and biogenesis	Initiation factor eIF2 gamma, C terminal	--	Protein-synthesizing GTPase OS=Guillardia theta (strain CCMP2712) OX=905079 GN=GUITHDRAFT_95780 PE=4 SV=1	J	Translation, ribosomal structure and biogenesis	translation initiation factor 2 gamma subunit [Capsaspora owczarzaki ATCC 30864]
BMK_Unigene_149871	[G]	Carbohydrate transport and metabolism	Biological Process: carbohydrate metabolic process (GO:0005975);; Molecular Function: intramolecular transferase activity, phosphotransferases (GO:0016868);;	--	[G]	Carbohydrate transport and metabolism	Phosphoglucomutase/phosphomannomutase, alpha/beta/alpha domain I;; Phosphoglucomutase/phosphomannomutase, alpha/beta/alpha domain II;; Phosphoglucomutase/phosphomannomutase, alpha/beta/alpha domain III	--	Phosphoglucomutase (alpha-D-glucose-1,6-bisphosphate-dependent) OS=Prunus dulcis OX=3755 GN=ALMOND_2B027323 PE=3 SV=1	G	Carbohydrate transport and metabolism	uncharacterized protein LOC107429325 isoform X1 [Ziziphus jujuba]
BMK_Unigene_149241	--	--	--	K22683|7.4e-72|thj:104801369|K22683 aspartyl protease family protein [EC:3.4.23.-] | (RefSeq) LOW QUALITY PROTEIN: aspartyl protease family protein 2	[O]	Posttranslational modification, protein turnover, chaperones	Xylanase inhibitor N-terminal;; Xylanase inhibitor C-terminal;; Eukaryotic aspartyl protease	Aspartyl protease family protein At5g10770 OS=Arabidopsis thaliana OX=3702 GN=At5g10770 PE=2 SV=1	Putative nepenthesin OS=Lupinus albus OX=3870 GN=Lal_00027041 PE=3 SV=1	O	Posttranslational modification, protein turnover, chaperones	aspartyl protease family protein At5g10770-like [Ziziphus jujuba]
BMK_Unigene_069983	--	--	Cellular Component: cellular_component (GO:0005575);; Cellular Component: obsolete cell (GO:0005623);; Cellular Component: plasma membrane (GO:0005886);; Cellular Component: membrane (GO:0016020);; Cellular Component: obsolete cell part (GO:0044464);; Cellular Component: cell periphery (GO:0071944);;	K20642|1.2e-73|lja:Lj3g3v2993420.1|K20642 Rho GTPase-activating protein 22/24/25 | (RefSeq) Lj3g3v2993420.1; -	[T]	Signal transduction mechanisms	P21-Rho-binding domain	Rho GTPase-activating protein 1 OS=Arabidopsis thaliana OX=3702 GN=ROPGAP1 PE=2 SV=1	Uncharacterized protein OS=Hevea brasiliensis OX=3981 GN=GH714_000643 PE=4 SV=1	T	Signal transduction mechanisms	rho GTPase-activating protein 1 isoform X1 [Ziziphus jujuba]
BMK_Unigene_301738	[G]	Carbohydrate transport and metabolism	Molecular Function: 6-phosphofructokinase activity (GO:0003872);; Molecular Function: ATP binding (GO:0005524);; Cellular Component: cytoplasm (GO:0005737);; Biological Process: fructose 6-phosphate metabolic process (GO:0006002);; Biological Process: glycolytic process (GO:0006096);; Molecular Function: metal ion binding (GO:0046872);;	--	[G]	Carbohydrate transport and metabolism	Phosphofructokinase	--	ATP-dependent 6-phosphofructokinase OS=Carpinus fangiana OX=176857 GN=FH972_021941 PE=3 SV=1	G	Carbohydrate transport and metabolism	ATP-dependent 6-phosphofructokinase-like [Rhodamnia argentea]
BMK_Unigene_192030	--	--	Cellular Component: nucleus (GO:0005634);; Cellular Component: cytoplasm (GO:0005737);; Molecular Function: hydrolase activity (GO:0016787);; Molecular Function: deoxynucleoside kinase activity (GO:0019136);;	--	--	--	--	--	At1g72040 OS=Arabidopsis thaliana OX=3702 GN=dNK PE=1 SV=1	F	Nucleotide transport and metabolism	unnamed protein product [Arabidopsis thaliana]
BMK_Unigene_286599	[Q]	Secondary metabolites biosynthesis, transport and catabolism	Molecular Function: peroxidase activity (GO:0004601);; Biological Process: response to oxidative stress (GO:0006979);; Cellular Component: integral component of membrane (GO:0016021);; Molecular Function: heme binding (GO:0020037);; Molecular Function: metal ion binding (GO:0046872);;	--	[R]	General function prediction only	Animal haem peroxidase	--	Uncharacterized protein OS=Cafeteria roenbergensis OX=33653 GN=FNF27_03401 PE=4 SV=1	--	--	peroxidase-like [Rhodamnia argentea]
BMK_Unigene_083726	[I]	Lipid transport and metabolism	Cellular Component: integral component of membrane (GO:0016021);;	K20506|2.6e-84|egu:105060863|K20506 tuliposide A-converting enzyme [EC:4.2.99.22] | (RefSeq) tuliposide A-converting enzyme 2, chloroplastic-like	[V]	Defense mechanisms	alpha/beta hydrolase fold;; Carboxylesterase family;; Steryl acetyl hydrolase	Probable carboxylesterase 13 OS=Arabidopsis thaliana OX=3702 GN=CXE13 PE=1 SV=1	Transmembrane protein OS=Trema orientale OX=63057 GN=TorRG33x02_024700 PE=4 SV=1	--	--	uncharacterized protein LOC107431885 [Ziziphus jujuba]
BMK_Unigene_135122	--	--	Biological Process: positive regulation of circadian rhythm (GO:0042753);;	--	--	--	Early Flowering 4 domain	Protein EARLY FLOWERING 4 OS=Arabidopsis thaliana OX=3702 GN=ELF4 PE=1 SV=1	Elf4 domain-containing protein OS=Trema orientale OX=63057 GN=TorRG33x02_176550 PE=3 SV=1	S	Function unknown	protein EARLY FLOWERING 4 isoform X1 [Ziziphus jujuba]
BMK_Unigene_158400	[C]	Energy production and conversion	Cellular Component: mitochondrial inner membrane (GO:0005743);; Molecular Function: NADH dehydrogenase (ubiquinone) activity (GO:0008137);; Molecular Function: electron transfer activity (GO:0009055);; Cellular Component: respirasome (GO:0070469);;	K11352|2.0e-83|ath:AT3G03100|K11352 NADH dehydrogenase (ubiquinone) 1 alpha subcomplex subunit 12 | (RefSeq) NADH:ubiquinone oxidoreductase, 17.2kDa subunit	[C]	Energy production and conversion	NADH ubiquinone oxidoreductase subunit NDUFA12	Probable NADH dehydrogenase [ubiquinone] 1 alpha subcomplex subunit 12 OS=Arabidopsis thaliana OX=3702 GN=At3g03100 PE=1 SV=1	NADH dehydrogenase [ubiquinone] 1 alpha subcomplex subunit 12 OS=Arabidopsis thaliana OX=3702 GN=AXX17_At3g02420 PE=3 SV=1	C	Energy production and conversion	NADH:ubiquinone oxidoreductase, 17.2kDa subunit [Arabidopsis thaliana]
BMK_Unigene_186339	--	--	Molecular Function: structural constituent of ribosome (GO:0003735);; Biological Process: translation (GO:0006412);; Cellular Component: cytosolic small ribosomal subunit (GO:0022627);;	K02984|4.2e-32|olu:OSTLU_28528|K02984 small subunit ribosomal protein S3Ae | (RefSeq) RPS3a; Ribosomal protein S3a, component of cytosolic 80S ribosome and 40S small subunit	[J]	Translation, ribosomal structure and biogenesis	Ribosomal S3Ae family	40S ribosomal protein S3a OS=Ostreococcus lucimarinus (strain CCE9901) OX=436017 GN=OSTLU_28528 PE=3 SV=1	40S ribosomal protein S3a OS=Aureococcus anophagefferens OX=44056 GN=AURANDRAFT_38843 PE=3 SV=1	J	Translation, ribosomal structure and biogenesis	hypothetical protein AURANDRAFT_38843 [Aureococcus anophagefferens]
BMK_Unigene_059332	--	--	Molecular Function: molecular_function (GO:0003674);; Molecular Function: DNA-binding transcription factor activity (GO:0003700);; Cellular Component: cellular_component (GO:0005575);; Cellular Component: intracellular (GO:0005622);; Cellular Component: obsolete cell (GO:0005623);; Cellular Component: nucleus (GO:0005634);; Biological Process: regulation of transcription, DNA-templated (GO:000635…	--	[R]	General function prediction only	C2H2-type zinc finger;; C2H2-type zinc finger	Zinc finger protein ZAT11 OS=Arabidopsis thaliana OX=3702 GN=ZAT11 PE=2 SV=1	zinc finger protein ZAT11-like OS=Juglans regia OX=51240 GN=LOC108986325 PE=4 SV=1	S	Function unknown	zinc finger protein ZAT11-like isoform X1 [Ziziphus jujuba]
BMK_Unigene_183537	[K]	Transcription	Molecular Function: DNA binding (GO:0003677);; Molecular Function: DNA-directed 5'-3' RNA polymerase activity (GO:0003899);; Biological Process: transcription, DNA-templated (GO:0006351);; Molecular Function: ribonucleoside binding (GO:0032549);;	K03010|1.9e-40|mdm:103446412|K03010 DNA-directed RNA polymerase II subunit RPB2 [EC:2.7.7.6] | (RefSeq) LOW QUALITY PROTEIN: DNA-directed RNA polymerase II subunit RPB2	[K]	Transcription	--	DNA-directed RNA polymerase II subunit RPB2 OS=Solanum lycopersicum OX=4081 GN=RPB2 PE=2 SV=1	DNA-directed RNA polymerase subunit beta (Fragment) OS=Trifolium pratense OX=57577 GN=L195_g004013 PE=3 SV=1	K	Transcription	DNA-directed RNA polymerase II subunit RPB2-like [Rhodamnia argentea]
BMK_Unigene_153499	[MDT]	--	Molecular Function: ATP binding (GO:0005524);;	K08900|1.6e-102|rcu:8275997|K08900 mitochondrial chaperone BCS1 | (RefSeq) LOW QUALITY PROTEIN: AAA-ATPase ASD, mitochondrial-like	[O]	Posttranslational modification, protein turnover, chaperones	Domain associated at C-terminal with AAA;; ATPase family associated with various cellular activities (AAA)	AAA-ATPase ASD, mitochondrial OS=Arabidopsis thaliana OX=3702 GN=AATP1 PE=1 SV=1	Adenosinetriphosphatase OS=Rosa chinensis OX=74649 GN=RchiOBHm_Chr7g0180181 PE=3 SV=1	O	Posttranslational modification, protein turnover, chaperones	AAA-ATPase ASD, mitochondrial-like [Ziziphus jujuba]
BMK_Unigene_261684	[J]	Translation, ribosomal structure and biogenesis	Molecular Function: tRNA binding (GO:0000049);; Molecular Function: aminoacyl-tRNA editing activity (GO:0002161);; Molecular Function: isoleucine-tRNA ligase activity (GO:0004822);; Molecular Function: ATP binding (GO:0005524);; Biological Process: isoleucyl-tRNA aminoacylation (GO:0006428);;	K01870|3.1e-24|cvr:CHLNCDRAFT_137710|K01870 isoleucyl-tRNA synthetase [EC:6.1.1.5] | (RefSeq) hypothetical protein	[J]	Translation, ribosomal structure and biogenesis	tRNA synthetases class I (I, L, M and V)	Isoleucine--tRNA ligase, cytoplasmic OS=Arabidopsis thaliana OX=3702 GN=At4g10320 PE=2 SV=1	Isoleucyl-tRNA synthetase OS=Blastocystis hominis OX=12968 GN=GSBLH_T00000294001 PE=3 SV=1	J	Translation, ribosomal structure and biogenesis	Isoleucine-tRNA ligase, cytoplasmic [Zancudomyces culisetae]
BMK_Unigene_153394	--	--	--	--	--	--	--	--	Uncharacterized protein OS=Parasponia andersonii OX=3476 GN=PanWU01x14_237550 PE=4 SV=1	--	--	uncharacterized protein LOC107435700 [Ziziphus jujuba]
BMK_Unigene_083633	--	--	Biological Process: nuclear-transcribed mRNA catabolic process, nonsense-mediated decay (GO:0000184);; Molecular Function: RNA binding (GO:0003723);;	K14327|0.0e+00|zju:107413612|K14327 regulator of nonsense transcripts 2 | (RefSeq) regulator of nonsense transcripts UPF2	[A]	RNA processing and modification	MIF4G domain;; Up-frameshift suppressor 2	Regulator of nonsense transcripts UPF2 OS=Arabidopsis thaliana OX=3702 GN=UPF2 PE=2 SV=1	Uncharacterized protein OS=Carpinus fangiana OX=176857 GN=FH972_001582 PE=4 SV=1	A	RNA processing and modification	regulator of nonsense transcripts UPF2 [Ziziphus jujuba]
BMK_Unigene_136350	[O]	Posttranslational modification, protein turnover, chaperones	Cellular Component: cytoplasm (GO:0005737);; Biological Process: aromatic amino acid family metabolic process (GO:0009072);; Molecular Function: isomerase activity (GO:0016853);;	K01800|7.6e-52|gsl:Gasu_17300|K01800 maleylacetoacetate isomerase [EC:5.2.1.2] | (RefSeq) maleylacetoacetate isomerase	[O]	Posttranslational modification, protein turnover, chaperones	Glutathione S-transferase, N-terminal domain;; Glutathione S-transferase, N-terminal domain;; Glutathione S-transferase, N-terminal domain;; Glutathione S-transferase, C-terminal domain;; Glutathione S-transferase, C-terminal domain;; Glutathione S-transferase, C-terminal domain	Glutathione S-transferase Z1 OS=Arabidopsis thaliana OX=3702 GN=GSTZ1 PE=1 SV=1	Maleylacetoacetate isomerase OS=Pythium insidiosum OX=114742 GN=PINS_007242 PE=3 SV=1	O	Posttranslational modification, protein turnover, chaperones	maleylacetoacetate isomerase [Pythium insidiosum]
BMK_Unigene_089479	--	--	Cellular Component: integral component of membrane (GO:0016021);; Molecular Function: transmembrane transporter activity (GO:0022857);;	K13783|3.5e-26|dcr:108219767|K13783 MFS transporter, OPA family, solute carrier family 37 (glycerol-3-phosphate transporter), member 1/2 | (RefSeq) putative glycerol-3-phosphate transporter 1	[G]	Carbohydrate transport and metabolism	--	Putative glycerol-3-phosphate transporter 1 OS=Arabidopsis thaliana OX=3702 GN=At3g47420 PE=2 SV=1	Sugar phosphate transporter OS=Parasponia andersonii OX=3476 GN=PanWU01x14_182820 PE=3 SV=1	G	Carbohydrate transport and metabolism	Sugar phosphate transporter [Parasponia andersonii]
BMK_Unigene_072768	[IQR]	--	--	K19329|1.3e-74|pxb:103963862|K19329 WW domain-containing oxidoreductase | (RefSeq) short-chain dehydrogenase TIC 32, chloroplastic-like isoform X1	[Q]	Secondary metabolites biosynthesis, transport and catabolism	short chain dehydrogenase;; Enoyl-(Acyl carrier protein) reductase	Short-chain dehydrogenase TIC 32, chloroplastic OS=Arabidopsis thaliana OX=3702 GN=TIC32 PE=2 SV=1	Short-chain dehydrogenase TIC 32 OS=Pyrus ussuriensis x Pyrus communis OX=2448454 GN=D8674_037792 PE=4 SV=1	Q	Secondary metabolites biosynthesis, transport and catabolism	short-chain dehydrogenase TIC 32, chloroplastic-like isoform X2 [Ziziphus jujuba]
BMK_Unigene_100273	--	--	--	--	--	--	Bestrophin, RFP-TM, chloride channel	--	--	--	--	hypothetical protein M407DRAFT_234083 [Tulasnella calospora MUT 4182]
BMK_Unigene_267121	[J]	Translation, ribosomal structure and biogenesis	Cellular Component: organellar ribosome (GO:0000313);; Biological Process: maturation of SSU-rRNA from tricistronic rRNA transcript (SSU-rRNA, 5.8S rRNA, LSU-rRNA) (GO:0000462);; Molecular Function: molecular_function (GO:0003674);; Molecular Function: structural constituent of ribosome (GO:0003735);; Molecular Function: structural molecule activity (GO:0005198);; Cellular Component: cellular_com…	K02995|2.1e-64|gmx:100500112|K02995 small subunit ribosomal protein S8e | (RefSeq) 40S ribosomal protein S8	[J]	Translation, ribosomal structure and biogenesis	Ribosomal protein S8e	40S ribosomal protein S8-2 OS=Arabidopsis thaliana OX=3702 GN=RPS8B PE=2 SV=1	Uncharacterized protein OS=Ectocarpus sp. CCAP 1310/34 OX=867726 GN=ESUBFT_80_11 PE=4 SV=1	J	Translation, ribosomal structure and biogenesis	unnamed protein product [Ectocarpus sp. CCAP 1310/34]
BMK_Unigene_121558	[E]	Amino acid transport and metabolism	Biological Process: glutathione catabolic process (GO:0006751);; Molecular Function: glutathione hydrolase activity (GO:0036374);;	K18592|6.7e-43|zju:107425418|K18592 gamma-glutamyltranspeptidase / glutathione hydrolase / leukotriene-C4 hydrolase [EC:2.3.2.2 3.4.19.13 3.4.19.14] | (RefSeq) glutathione hydrolase 1-like isoform X3	[E]	Amino acid transport and metabolism	Gamma-glutamyltranspeptidase	Glutathione hydrolase 1 OS=Arabidopsis thaliana OX=3702 GN=GGT1 PE=2 SV=1	Uncharacterized protein OS=Prunus persica OX=3760 GN=PRUPE_ppa002642mg PE=4 SV=1	E	Amino acid transport and metabolism	glutathione hydrolase 1-like isoform X1 [Ziziphus jujuba]
BMK_Unigene_121582	--	--	Molecular Function: endopeptidase inhibitor activity (GO:0004866);;	--	--	--	Trypsin and protease inhibitor	Kunitz type trypsin inhibitor 111 OS=Medicago truncatula OX=3880 GN=KPI111 PE=1 SV=1	Uncharacterized protein OS=Rosa chinensis OX=74649 GN=RchiOBHm_Chr5g0029031 PE=3 SV=1	S	Function unknown	hypothetical protein FNV43_RR16249 [Rhamnella rubrinervis]
BMK_Unigene_001637	--	--	--	K03648|1.8e-41|bpg:Bathy04g01430|K03648 uracil-DNA glycosylase [EC:3.2.2.27] | (RefSeq) uracil-DNA glycosylase	--	--	YqaJ-like viral recombinase domain	--	YqaJ domain-containing protein OS=Prunus yedoensis var. nudiflora OX=2094558 GN=Pyn_33640 PE=4 SV=1	S	Function unknown	uncharacterized protein LOC107428396 [Ziziphus jujuba]
BMK_Unigene_135813	--	--	Molecular Function: protein serine/threonine phosphatase activity (GO:0004722);; Molecular Function: magnesium-dependent protein serine/threonine phosphatase activity (GO:0004724);; Cellular Component: nucleus (GO:0005634);; Cellular Component: cytosol (GO:0005829);; Molecular Function: metal ion binding (GO:0046872);;	K14497|2.6e-12|zju:107435757|K14497 protein phosphatase 2C [EC:3.1.3.16] | (RefSeq) protein phosphatase 2C 16-like	--	--	--	--	Protein-serine/threonine phosphatase OS=Populus trichocarpa OX=3694 GN=POPTR_003G044200 PE=3 SV=2	T	Signal transduction mechanisms	protein phosphatase 2C 16-like [Ziziphus jujuba]
BMK_Unigene_147622	--	--	Cellular Component: proteasome complex (GO:0000502);;	K11876|2.1e-157|zju:107435559|K11876 proteasome assembly chaperone 2 | (RefSeq) proteasome assembly chaperone 2-like isoform X1	[S]	Function unknown	PAC2 family	--	Proteasome assembly chaperone 2 OS=Juglans regia OX=51240 GN=LOC109010699 PE=3 SV=1	O	Posttranslational modification, protein turnover, chaperones	proteasome assembly chaperone 2-like isoform X1 [Ziziphus jujuba]
BMK_Unigene_151382	[R]	General function prediction only	Molecular Function: hydrolase activity (GO:0016787);;	K04567|1.1e-32|cqi:110719595|K04567 lysyl-tRNA synthetase, class II [EC:6.1.1.6] | (RefSeq) lysine--tRNA ligase-like	--	--	Calcineurin-like phosphoesterase superfamily domain;; Calcineurin-like phosphoesterase	--	Metallo-dependent phosphatase-like OS=Trema orientale OX=63057 GN=TorRG33x02_153460 PE=4 SV=1	S	Function unknown	uncharacterized protein LOC107426991 [Ziziphus jujuba]
BMK_Unigene_152729	[E]	Amino acid transport and metabolism	Cellular Component: membrane (GO:0016020);; Molecular Function: transmembrane transporter activity (GO:0022857);; Biological Process: transmembrane transport (GO:0055085);;	K14638|1.7e-267|zju:107434528|K14638 solute carrier family 15 (peptide/histidine transporter), member 3/4 | (RefSeq) protein NRT1/ PTR FAMILY 5.10-like	[E]	Amino acid transport and metabolism	POT family;; POT family	Protein NRT1/ PTR FAMILY 5.10 OS=Arabidopsis thaliana OX=3702 GN=NPF5.10 PE=2 SV=1	Protein NRT1/ PTR FAMILY 5.10 OS=Morella rubra OX=262757 GN=CJ030_MR8G027408 PE=3 SV=1	E	Amino acid transport and metabolism	protein NRT1/ PTR FAMILY 5.10-like [Ziziphus jujuba]
BMK_Unigene_084251	--	--	--	--	[K]	Transcription	--	--	Uncharacterized protein OS=Carpinus fangiana OX=176857 GN=FH972_000610 PE=4 SV=1	--	--	hypothetical protein FNV43_RR08212 [Rhamnella rubrinervis]
BMK_Unigene_134771	[Q]	Secondary metabolites biosynthesis, transport and catabolism	Biological Process: lipid metabolic process (GO:0006629);; Biological Process: suberin biosynthetic process (GO:0010345);; Biological Process: long-chain fatty-acyl-CoA metabolic process (GO:0035336);; Cellular Component: intracellular membrane-bounded organelle (GO:0043231);; Molecular Function: fatty-acyl-CoA reductase (alcohol-forming) activity (GO:0080019);; Molecular Function: alcohol-formin…	K13356|2.0e-177|pop:7474947|K13356 alcohol-forming fatty acyl-CoA reductase [EC:1.2.1.84] | (RefSeq) alcohol-forming fatty acyl-CoA reductase	[I]	Lipid transport and metabolism	Male sterility protein;; Male sterility protein;; NAD dependent epimerase/dehydratase family	Alcohol-forming fatty acyl-CoA reductase OS=Simmondsia chinensis OX=3999 PE=1 SV=1	Fatty acyl-CoA reductase OS=Populus trichocarpa OX=3694 GN=POPTR_009G145000 PE=3 SV=2	I	Lipid transport and metabolism	hypothetical protein FNV43_RR05544 [Rhamnella rubrinervis]
BMK_Unigene_149615	--	--	Molecular Function: calmodulin binding (GO:0005516);;	--	--	--	Plant calmodulin-binding domain	--	CaM_binding domain-containing protein OS=Prunus persica OX=3760 GN=PRUPE_1G460100 PE=4 SV=1	S	Function unknown	DNA topoisomerase 1-like [Ziziphus jujuba]
BMK_Unigene_056108	--	--	--	--	--	--	Sushi repeat (SCR repeat)	--	--	--	--	--
BMK_Unigene_083328	[J]	Translation, ribosomal structure and biogenesis	Molecular Function: iron ion binding (GO:0005506);; Cellular Component: nucleus (GO:0005634);; Molecular Function: 2-oxoglutarate-dependent dioxygenase activity (GO:0016706);;	K21760|0.0e+00|zju:107430095|K21760 bifunctional lysine-specific demethylase and histidyl-hydroxylase MINA [EC:1.14.11.-] | (RefSeq) uncharacterized protein LOC107430095 isoform X1	[S]	Function unknown	Cupin superfamily protein	--	Bifunctional lysine-specific demethylase and histidyl-hydroxylase OS=Juglans regia OX=51240 GN=LOC109008179 PE=3 SV=1	S	Function unknown	uncharacterized protein LOC107430095 isoform X2 [Ziziphus jujuba]
BMK_Unigene_069995	[T]	Signal transduction mechanisms	Molecular Function: protein serine/threonine phosphatase activity (GO:0004722);;	K14497|3.2e-24|mtr:MTR_5g009370|K14497 protein phosphatase 2C [EC:3.1.3.16] | (RefSeq) phosphatase 2C family protein	[T]	Signal transduction mechanisms	Protein phosphatase 2C	Probable protein phosphatase 2C 72 OS=Arabidopsis thaliana OX=3702 GN=At5g26010 PE=2 SV=2	Protein phosphatase OS=Trema orientale OX=63057 GN=TorRG33x02_180540 PE=4 SV=1	T	Signal transduction mechanisms	probable protein phosphatase 2C 72 [Ziziphus jujuba]
BMK_Unigene_077625	[P]	Inorganic ion transport and metabolism	Molecular Function: calcium transmembrane transporter activity, phosphorylative mechanism (GO:0005388);; Molecular Function: calmodulin binding (GO:0005516);; Molecular Function: ATP binding (GO:0005524);; Cellular Component: integral component of membrane (GO:0016021);;	K01537|3.0e-192|zju:107420566|K01537 P-type Ca2+ transporter type 2C [EC:7.2.2.10] | (RefSeq) calcium-transporting ATPase 1-like isoform X1	[P]	Inorganic ion transport and metabolism	E1-E2 ATPase;; Ca2+-ATPase N terminal autoinhibitory domain;; Cation transporter/ATPase, N-terminus	Calcium-transporting ATPase 1 OS=Arabidopsis thaliana OX=3702 GN=ACA1 PE=1 SV=3	Calcium-transporting ATPase OS=Arachis hypogaea OX=3818 GN=Ahy_A07g033127 PE=3 SV=1	P	Inorganic ion transport and metabolism	calcium-transporting ATPase 1-like isoform X2 [Ziziphus jujuba]
BMK_Unigene_297932	--	--	Molecular Function: calcium ion binding (GO:0005509);;	--	--	--	EF-hand domain pair;; EF-hand domain;; EF hand;; EF hand;; EF-hand domain pair	--	--	--	--	--
BMK_Unigene_028097	--	--	--	--	--	--	Ankyrin repeats (many copies);; Ankyrin repeat;; Ankyrin repeats (many copies);; Ankyrin repeats (3 copies);; Ankyrin repeat	--	--	G	Carbohydrate transport and metabolism	--
BMK_Unigene_077485	--	--	Molecular Function: ubiquitin protein ligase activity (GO:0061630);;	K10143|2.3e-223|zju:107417151|K10143 E3 ubiquitin-protein ligase RFWD2 [EC:2.3.2.27] | (RefSeq) E3 ubiquitin-protein ligase COP1 isoform X1	--	--	Zinc finger, C3HC4 type (RING finger);; Zinc finger, C3HC4 type (RING finger);; Zinc finger, C3HC4 type (RING finger);; Ring finger domain	E3 ubiquitin-protein ligase COP1 OS=Pisum sativum OX=3888 GN=COP1 PE=2 SV=1	Guanine nucleotide-binding protein, beta subunit OS=Trema orientale OX=63057 GN=TorRG33x02_196850 PE=4 SV=1	T	Signal transduction mechanisms	E3 ubiquitin-protein ligase COP1 isoform X1 [Ziziphus jujuba]
BMK_Unigene_065305	--	--	--	K06630|3.5e-61|lsv:111908937|K06630 14-3-3 protein epsilon | (RefSeq) 14-3-3 protein 2	[O]	Posttranslational modification, protein turnover, chaperones	14-3-3 protein	14-3-3 protein 2 OS=Solanum lycopersicum OX=4081 GN=TFT2 PE=3 SV=2	1433_10 protein OS=Anthurium amnicola OX=1678845 GN=1433_10 PE=3 SV=1	O	Posttranslational modification, protein turnover, chaperones	14-3-3 protein [Calocera cornea HHB12733]
BMK_Unigene_152091	[G]	Carbohydrate transport and metabolism	Molecular Function: magnesium ion binding (GO:0000287);; Molecular Function: molecular_function (GO:0003674);; Molecular Function: catalytic activity (GO:0003824);; Molecular Function: trehalose-phosphatase activity (GO:0004805);; Molecular Function: binding (GO:0005488);; Cellular Component: cellular_component (GO:0005575);; Cellular Component: intracellular (GO:0005622);; Cellular Component: ob…	K01087|3.0e-213|zju:107430298|K01087 trehalose 6-phosphate phosphatase [EC:3.1.3.12] | (RefSeq) probable trehalose-phosphate phosphatase F	[G]	Carbohydrate transport and metabolism	Trehalose-phosphatase;; Trehalose-phosphatase	Probable trehalose-phosphate phosphatase F OS=Arabidopsis thaliana OX=3702 GN=TPPF PE=2 SV=1	Transaldolase OS=Hevea brasiliensis OX=3981 GN=GH714_029821 PE=3 SV=1	G	Carbohydrate transport and metabolism	probable trehalose-phosphate phosphatase F [Ziziphus jujuba]
BMK_Unigene_140033	--	--	Cellular Component: nucleosome (GO:0000786);; Molecular Function: DNA binding (GO:0003677);; Cellular Component: nucleus (GO:0005634);; Biological Process: nucleosome assembly (GO:0006334);; Cellular Component: host cell nucleus (GO:0042025);;	K11275|1.8e-49|zju:107424398|K11275 histone H1/5 | (RefSeq) histone H1	--	--	linker histone H1 and H5 family	Histone H1 OS=Solanum pennellii OX=28526 PE=2 SV=1	H15 domain-containing protein OS=Gossypium barbadense OX=3634 GN=ES319_A11G188500v1 PE=3 SV=1	B	Chromatin structure and dynamics	histone H1 [Ziziphus jujuba]
BMK_Unigene_130268	[F]	Nucleotide transport and metabolism	Molecular Function: nucleoside diphosphate kinase activity (GO:0004550);; Molecular Function: ATP binding (GO:0005524);; Biological Process: GTP biosynthetic process (GO:0006183);; Biological Process: UTP biosynthetic process (GO:0006228);; Biological Process: CTP biosynthetic process (GO:0006241);;	K00940|4.4e-55|qsu:111983722|K00940 nucleoside-diphosphate kinase [EC:2.7.4.6] | (RefSeq) nucleoside diphosphate kinase-like	[F]	Nucleotide transport and metabolism	Nucleoside diphosphate kinase	Nucleoside diphosphate kinase 1 OS=Mesembryanthemum crystallinum OX=3544 GN=NDKP1 PE=2 SV=1	Nucleoside diphosphate kinase (Fragment) OS=Anthurium amnicola OX=1678845 GN=awd_0 PE=3 SV=1	F	Nucleotide transport and metabolism	hypothetical protein GUITHDRAFT_93413, partial [Guillardia theta CCMP2712]
BMK_Unigene_295366	--	--	--	--	--	--	SKI/SNO/DAC family	--	--	--	--	--
BMK_Unigene_275738	--	--	Cellular Component: cellular_component (GO:0005575);; Cellular Component: extracellular region (GO:0005576);; Cellular Component: cell wall (GO:0005618);; Cellular Component: intracellular (GO:0005622);; Cellular Component: obsolete cell (GO:0005623);; Cellular Component: cytoplasm (GO:0005737);; Cellular Component: Golgi apparatus (GO:0005794);; Cellular Component: plasma membrane (GO:0005886);;…	--	--	--	--	EP1-like glycoprotein 2 OS=Arabidopsis thaliana OX=3702 GN=At1g78830 PE=1 SV=1	Bulb-type lectin domain-containing protein OS=Arabidopsis thaliana OX=3702 GN=AN1_LOCUS6927 PE=4 SV=1	S	Function unknown	Curculin-like (mannose-binding) lectin family protein [Arabidopsis thaliana]
BMK_Unigene_142796	--	--	Cellular Component: cellular_component (GO:0005575);; Cellular Component: obsolete cell (GO:0005623);; Cellular Component: plasma membrane (GO:0005886);; Biological Process: response to stress (GO:0006950);; Biological Process: defense response (GO:0006952);; Biological Process: cell communication (GO:0007154);; Biological Process: signal transduction (GO:0007165);; Biological Process: biological…	--	--	--	--	--	uncharacterized protein LOC106774205 OS=Vigna radiata var. radiata OX=3916 GN=LOC106774205 PE=4 SV=1	T	Signal transduction mechanisms	uncharacterized protein LOC107404488 [Ziziphus jujuba]
BMK_Unigene_156879	--	--	--	--	--	--	--	--	--	--	--	hypothetical protein DL769_010863 [Monosporascus sp. CRB-8-3]
BMK_Unigene_165873	--	--	Molecular Function: translation initiation factor activity (GO:0003743);;	--	[J]	Translation, ribosomal structure and biogenesis	Eukaryotic translation initiation factor eIF2A	--	Eukaryotic translation initiation factor 2A OS=Albugo laibachii Nc14 OX=890382 GN=AlNc14C30G2838 PE=3 SV=1	J	Translation, ribosomal structure and biogenesis	eukaryotic translation initiation factor 2A putative [Albugo laibachii Nc14]
BMK_Unigene_125174	--	--	Biological Process: ribosomal small subunit assembly (GO:0000028);; Molecular Function: RNA binding (GO:0003723);; Molecular Function: structural constituent of ribosome (GO:0003735);; Biological Process: translation (GO:0006412);; Cellular Component: cytosolic small ribosomal subunit (GO:0022627);; Molecular Function: metal ion binding (GO:0046872);;	K02978|5.3e-33|bdi:100839931|K02978 small subunit ribosomal protein S27e | (RefSeq) 40S ribosomal protein S27	[J]	Translation, ribosomal structure and biogenesis	Ribosomal protein S27	40S ribosomal protein S27 OS=Hordeum vulgare OX=4513 GN=RPS27 PE=3 SV=2	40S ribosomal protein S27 OS=Brachypodium distachyon OX=15368 GN=100839931 PE=3 SV=1	J	Translation, ribosomal structure and biogenesis	ribosomal protein S27 [Syncephalis pseudoplumigaleata]
BMK_Unigene_051892	[C]	Energy production and conversion	Cellular Component: mitochondrion (GO:0005739);; Molecular Function: NADH dehydrogenase (ubiquinone) activity (GO:0008137);; Cellular Component: integral component of membrane (GO:0016021);; Cellular Component: respirasome (GO:0070469);;	K03880|6.5e-09|mis:MicpuN_mit79|K03880 NADH-ubiquinone oxidoreductase chain 3 [EC:7.1.1.2] | (RefSeq) nad3; NADH dehydrogenase subunit 3	[C]	Energy production and conversion	--	NADH-ubiquinone oxidoreductase chain 3 OS=Marchantia polymorpha OX=3197 GN=ND3 PE=3 SV=2	NADH-ubiquinone oxidoreductase chain 3 OS=Picocystis salinarum OX=88271 GN=nad3 PE=3 SV=1	C	Energy production and conversion	NADH dehydrogenase subunit 3 [Picocystis salinarum]
BMK_Unigene_145786	--	--	Molecular Function: calcium ion binding (GO:0005509);;	--	--	--	--	--	EF-hand domain-containing protein OS=Prunus yedoensis var. nudiflora OX=2094558 GN=Pyn_31285 PE=4 SV=1	S	Function unknown	uncharacterized protein LOC107412205 [Ziziphus jujuba]
BMK_Unigene_321030	--	--	--	--	--	--	--	--	--	--	--	hypothetical protein M407DRAFT_31169 [Tulasnella calospora MUT 4182]
BMK_Unigene_080098	[O]	Posttranslational modification, protein turnover, chaperones	Molecular Function: molecular_function (GO:0003674);; Molecular Function: binding (GO:0005488);; Molecular Function: protein binding (GO:0005515);; Molecular Function: cytoskeletal protein binding (GO:0008092);; Biological Process: biological_process (GO:0008150);; Biological Process: response to external stimulus (GO:0009605);; Biological Process: tropism (GO:0009606);; Biological Process: respo…	K14566|5.0e-21|aof:109844566|K14566 U3 small nucleolar RNA-associated protein 24 | (RefSeq) uncharacterized protein LOC109844566 isoform X1	[O]	Posttranslational modification, protein turnover, chaperones	DnaJ domain	Chaperone protein dnaJ 15 OS=Arabidopsis thaliana OX=3702 GN=ATJ15 PE=1 SV=1	Terminal organelle assembly protein OS=Trema orientale OX=63057 GN=TorRG33x02_289260 PE=4 SV=1	O	Posttranslational modification, protein turnover, chaperones	chaperone protein dnaJ 15 [Ziziphus jujuba]
BMK_Unigene_151237	[I]	Lipid transport and metabolism	Molecular Function: hydroxymethylglutaryl-CoA synthase activity (GO:0004421);; Biological Process: isoprenoid biosynthetic process (GO:0008299);; Biological Process: sterol biosynthetic process (GO:0016126);;	K01641|4.3e-156|jre:108990864|K01641 hydroxymethylglutaryl-CoA synthase [EC:2.3.3.10] | (RefSeq) hydroxymethylglutaryl-CoA synthase-like	[I]	Lipid transport and metabolism	Hydroxymethylglutaryl-coenzyme A synthase C terminal;; Hydroxymethylglutaryl-coenzyme A synthase N terminal;; Hydroxymethylglutaryl-coenzyme A synthase C terminal;; Hydroxymethylglutaryl-coenzyme A synthase N terminal	Hydroxymethylglutaryl-CoA synthase OS=Arabidopsis thaliana OX=3702 GN=HMGS PE=1 SV=2	3-hydroxy-3-methylglutaryl coenzyme A synthase OS=Juglans regia OX=51240 GN=LOC108990864 PE=3 SV=1	I	Lipid transport and metabolism	hypothetical protein FNV43_RR09185 [Rhamnella rubrinervis]
BMK_Unigene_142010	--	--	Cellular Component: integral component of membrane (GO:0016021);; Molecular Function: kinase activity (GO:0016301);; Molecular Function: carbohydrate binding (GO:0030246);;	--	--	--	Legume lectin domain	L-type lectin-domain containing receptor kinase S.6 OS=Arabidopsis thaliana OX=3702 GN=LECRKS6 PE=2 SV=1	L-type lectin-domain containing receptor kinase VIII.1-like OS=Prunus yedoensis var. nudiflora OX=2094558 GN=Pyn_24037 PE=3 SV=1	S	Function unknown	L-type lectin-domain containing receptor kinase VIII.1-like [Ziziphus jujuba]
BMK_Unigene_004238	--	--	Biological Process: reproduction (GO:0000003);; Cellular Component: ubiquitin ligase complex (GO:0000151);; Biological Process: RNA splicing, via transesterification reactions (GO:0000375);; Biological Process: RNA splicing, via transesterification reactions with bulged adenosine as nucleophile (GO:0000377);; Biological Process: mRNA splicing, via spliceosome (GO:0000398);; Cellular Component: Pr…	K12862|9.5e-91|zju:107433121|K12862 pleiotropic regulator 1 | (RefSeq) protein pleiotropic regulatory locus 1	[A]	RNA processing and modification	WD domain, G-beta repeat	Protein pleiotropic regulatory locus 1 OS=Arabidopsis thaliana OX=3702 GN=PRL1 PE=1 SV=1	Protein pleiotropic regulatory locus 1-like OS=Dorcoceras hygrometricum OX=472368 GN=F511_41789 PE=4 SV=1	A	RNA processing and modification	protein pleiotropic regulatory locus 1 [Ziziphus jujuba]
BMK_Unigene_141523	[T]	Signal transduction mechanisms	Molecular Function: protein kinase activity (GO:0004672);; Molecular Function: ATP binding (GO:0005524);; Cellular Component: integral component of membrane (GO:0016021);; Molecular Function: carbohydrate binding (GO:0030246);; Biological Process: recognition of pollen (GO:0048544);;	K01183|1.3e-53|nsy:104241083|K01183 chitinase [EC:3.2.1.14] | (RefSeq) chitinase-3-like protein 2	--	--	Protein tyrosine and serine/threonine kinase;; Protein kinase domain;; Domain of unknown function (DUF3403)	Receptor-like serine/threonine-protein kinase SD1-6 OS=Arabidopsis thaliana OX=3702 GN=SD16 PE=1 SV=2	G-type lectin S-receptor-like serine/threonine-protein kinase RKS1 OS=Morus notabilis OX=981085 GN=L484_005008 PE=4 SV=1	T	Signal transduction mechanisms	G-type lectin S-receptor-like serine/threonine-protein kinase RKS1 [Ziziphus jujuba]
BMK_Unigene_155053	[G]	Carbohydrate transport and metabolism	Molecular Function: ATP binding (GO:0005524);; Biological Process: pyruvate metabolic process (GO:0006090);; Molecular Function: kinase activity (GO:0016301);; Molecular Function: metal ion binding (GO:0046872);; Molecular Function: pyruvate, phosphate dikinase activity (GO:0050242);;	K01006|0.0e+00|cmax:111479137|K01006 pyruvate, orthophosphate dikinase [EC:2.7.9.1] | (RefSeq) pyruvate, phosphate dikinase, chloroplastic	--	--	PEP-utilising enzyme, PEP-binding domain;; PEP-utilising enzyme, mobile domain;; Pyruvate phosphate dikinase, AMP/ATP-binding domain;; Pyruvate phosphate dikinase, AMP/ATP-binding domain	Pyruvate, phosphate dikinase, chloroplastic OS=Mesembryanthemum crystallinum OX=3544 GN=PPD PE=2 SV=1	Pyruvate, phosphate dikinase OS=Acer yangbiense OX=1000413 GN=EZV62_000418 PE=3 SV=1	T	Signal transduction mechanisms	hypothetical protein FNV43_RR01930 [Rhamnella rubrinervis]
BMK_Unigene_144823	--	--	Cellular Component: 1,3-beta-D-glucan synthase complex (GO:0000148);; Molecular Function: 1,3-beta-D-glucan synthase activity (GO:0003843);; Biological Process: (1->3)-beta-D-glucan biosynthetic process (GO:0006075);; Cellular Component: integral component of membrane (GO:0016021);;	K11000|1.2e-191|zju:107434655|K11000 callose synthase [EC:2.4.1.-] | (RefSeq) callose synthase 1	[M]	Cell wall/membrane/envelope biogenesis	Vta1 like;; 1,3-beta-glucan synthase subunit FKS1, domain-1	Callose synthase 2 OS=Arabidopsis thaliana OX=3702 GN=CALS2 PE=2 SV=3	1,3-beta-glucan synthase OS=Citrus unshiu OX=55188 GN=CUMW_026440 PE=3 SV=1	M	Cell wall/membrane/envelope biogenesis	callose synthase 1 [Ziziphus jujuba]
BMK_Unigene_150350	--	--	Cellular Component: chloroplast (GO:0009507);; Molecular Function: violaxanthin de-epoxidase activity (GO:0046422);;	K09839|4.8e-12|cam:101494261|K09839 violaxanthin de-epoxidase [EC:1.23.5.1] | (RefSeq) violaxanthin de-epoxidase, chloroplastic	--	--	VDE lipocalin domain	--	Violaxanthin de-epoxidase-like protein OS=Trema orientale OX=63057 GN=TorRG33x02_185100 PE=4 SV=1	S	Function unknown	hypothetical protein FNV43_RR18765 [Rhamnella rubrinervis]
BMK_Unigene_096238	--	--	Molecular Function: structural constituent of ribosome (GO:0003735);; Cellular Component: ribosome (GO:0005840);; Biological Process: translation (GO:0006412);;	K02903|2.3e-11|ppp:112290979|K02903 large subunit ribosomal protein L28e | (RefSeq) 60S ribosomal protein L28-1-like	[J]	Translation, ribosomal structure and biogenesis	Ribosomal L28e protein family	--	60S ribosomal protein L28 OS=Anthurium amnicola OX=1678845 GN=RpL28_1 PE=3 SV=1	J	Translation, ribosomal structure and biogenesis	ribosomal protein L28 [Rhizophagus diaphanus] [Rhizophagus sp. MUCL 43196]
BMK_Unigene_077695	[R]	General function prediction only	--	--	--	--	Tetratricopeptide repeat;; Tetratricopeptide repeat;; Tetratricopeptide repeat;; Protein kinase G tetratricopeptide repeat;; Tetratricopeptide repeat	protein SLOW GREEN 1, chloroplastic OS=Arabidopsis thaliana OX=3702 GN=SG1 PE=1 SV=1	PREDICTED: SLOW GREEN 1 OS=Prunus dulcis OX=3755 GN=ALMOND_2B018680 PE=4 SV=1	--	--	protein SLOW GREEN 1, chloroplastic [Ziziphus jujuba]
BMK_Unigene_288285	--	--	--	K02947|2.2e-25|mis:MICPUN_90249|K02947 small subunit ribosomal protein S10e | (RefSeq) predicted protein	[J]	Translation, ribosomal structure and biogenesis	Plectin/S10 domain	40S ribosomal protein S10-1 OS=Oryza sativa subsp. japonica OX=39947 GN=RPS10-1 PE=2 SV=1	S10_plectin domain-containing protein OS=Globisporangium ultimum (strain ATCC 200006 / CBS 805.95 / DAOM BR144) OX=431595 PE=4 SV=1	J	Translation, ribosomal structure and biogenesis	hypothetical protein PHYSODRAFT_286426 [Phytophthora sojae]
BMK_Unigene_083797	[P]	Inorganic ion transport and metabolism	Molecular Function: protein kinase activity (GO:0004672);; Molecular Function: ATP binding (GO:0005524);; Cellular Component: integral component of membrane (GO:0016021);; Biological Process: transmembrane transport (GO:0055085);;	--	[P]	Inorganic ion transport and metabolism	Citrate transporter;; Arsenical pump membrane protein;; Tify domain binding domain	Silicon efflux transporter LSI2 OS=Oryza sativa subsp. japonica OX=39947 GN=LSI2 PE=1 SV=1	Protein kinase domain-containing protein OS=Nyssa sinensis OX=561372 GN=F0562_026628 PE=4 SV=1	P	Inorganic ion transport and metabolism	ninja-family protein mc410 [Ziziphus jujuba]
BMK_Unigene_148703	[T]	Signal transduction mechanisms	Molecular Function: protein serine/threonine kinase activity (GO:0004674);; Molecular Function: ATP binding (GO:0005524);; Cellular Component: integral component of membrane (GO:0016021);; Biological Process: recognition of pollen (GO:0048544);;	K24104|3.6e-37|thj:104799061|K24104 GPN-loop GTPase | (RefSeq) LOW QUALITY PROTEIN: uncharacterized protein LOC104799061	--	--	D-mannose binding lectin;; S-locus glycoprotein domain;; PAN-like domain	G-type lectin S-receptor-like serine/threonine-protein kinase RKS1 OS=Arabidopsis thaliana OX=3702 GN=RKS1 PE=3 SV=3	Receptor-like serine/threonine-protein kinase OS=Trema orientale OX=63057 GN=TorRG33x02_234640 PE=3 SV=1	T	Signal transduction mechanisms	G-type lectin S-receptor-like serine/threonine-protein kinase RKS1 isoform X2 [Ziziphus jujuba]
BMK_Unigene_081858	--	--	Biological Process: cell morphogenesis (GO:0000902);; Biological Process: post-chaperonin tubulin folding pathway (GO:0007023);; Molecular Function: tubulin binding (GO:0015631);;	K21766|1.9e-192|zju:107425183|K21766 tubulin-specific chaperone C | (RefSeq) tubulin-folding cofactor C	[O]	Posttranslational modification, protein turnover, chaperones	Tubulin binding cofactor C;; Tubulin-specific chaperone C N-terminal domain	Tubulin-folding cofactor C OS=Arabidopsis thaliana OX=3702 GN=TFCC PE=1 SV=1	Tubulin-folding cofactor C OS=Trema orientale OX=63057 GN=TorRG33x02_180260 PE=3 SV=1	O	Posttranslational modification, protein turnover, chaperones	tubulin-folding cofactor C [Ziziphus jujuba]
BMK_Unigene_074081	--	--	Molecular Function: protein serine/threonine kinase activity (GO:0004674);; Molecular Function: ATP binding (GO:0005524);; Cellular Component: plasma membrane (GO:0005886);; Biological Process: hormone-mediated signaling pathway (GO:0009755);; Cellular Component: integral component of membrane (GO:0016021);;	K00924|8.6e-29|cpap:110818260|K00924 kinase [EC:2.7.1.-] | (RefSeq) receptor protein kinase CLAVATA1	--	--	Protein tyrosine and serine/threonine kinase;; Protein kinase domain	Probable LRR receptor-like serine/threonine-protein kinase At1g34110 OS=Arabidopsis thaliana OX=3702 GN=At1g34110 PE=1 SV=2	Leucine-rich receptor-like protein kinase family protein isoform 2 OS=Theobroma cacao OX=3641 GN=TCM_035808 PE=3 SV=1	T	Signal transduction mechanisms	uncharacterized protein LOC107421573 [Ziziphus jujuba]
BMK_Unigene_323002	--	--	Biological Process: phospholipid biosynthetic process (GO:0008654);; Cellular Component: membrane (GO:0016020);; Molecular Function: phosphotransferase activity, for other substituted phosphate groups (GO:0016780);;	--	--	--	CDP-alcohol phosphatidyltransferase	--	--	--	--	--
BMK_Unigene_156614	--	--	Biological Process: transcription-dependent tethering of RNA polymerase II gene DNA at nuclear periphery (GO:0000972);; Biological Process: regulation of transcription, DNA-templated (GO:0006355);; Biological Process: RNA export from nucleus (GO:0006405);; Biological Process: protein import into nucleus (GO:0006606);; Cellular Component: membrane (GO:0016020);; Molecular Function: structural cons…	K14300|2.3e-126|zju:107432216|K14300 nuclear pore complex protein Nup133 | (RefSeq) nuclear pore complex protein NUP133	--	--	Non-repetitive/WGA-negative nucleoporin C-terminal	Nuclear pore complex protein NUP133 OS=Arabidopsis thaliana OX=3702 GN=NUP133 PE=1 SV=1	Uncharacterized protein OS=Prunus persica OX=3760 GN=PRUPE_3G200800 PE=3 SV=1	S	Function unknown	nuclear pore complex protein NUP133 [Ziziphus jujuba]
BMK_Unigene_200708	--	--	Molecular Function: acid phosphatase activity (GO:0003993);; Molecular Function: metal ion binding (GO:0046872);;	K22390|1.0e-11|sita:101753372|K22390 acid phosphatase type 7 | (RefSeq) probable inactive purple acid phosphatase 1	[G]	Carbohydrate transport and metabolism	Iron/zinc purple acid phosphatase-like protein C	--	Purple acid phosphatase OS=Brachypodium distachyon OX=15368 GN=100845727 PE=3 SV=1	G	Carbohydrate transport and metabolism	hypothetical protein CAOG_02793 [Capsaspora owczarzaki ATCC 30864]
BMK_Unigene_182191	--	--	Molecular Function: pectate lyase activity (GO:0030570);; Biological Process: pectin catabolic process (GO:0045490);; Molecular Function: metal ion binding (GO:0046872);;	K01728|7.9e-57|ath:AT1G04680|K01728 pectate lyase [EC:4.2.2.2] | (RefSeq) Pectin lyase-like superfamily protein	--	--	--	Probable pectate lyase 1 OS=Arabidopsis thaliana OX=3702 GN=At1g04680 PE=2 SV=2	Pectate lyase OS=Arabidopsis thaliana OX=3702 GN=AXX17_At1g04020 PE=3 SV=1	G	Carbohydrate transport and metabolism	Pectin lyase-like superfamily protein [Arabidopsis thaliana]
BMK_Unigene_296512	[T]	Signal transduction mechanisms	Molecular Function: protein kinase activity (GO:0004672);; Molecular Function: protein tyrosine kinase activity (GO:0004713);; Molecular Function: ATP binding (GO:0005524);; Biological Process: protein phosphorylation (GO:0006468);;	K11228|4.6e-09|qsu:112009636|K11228 mitogen-activated protein kinase kinase kinase [EC:2.7.11.25] | (RefSeq) uncharacterized protein LOC112009636	[T]	Signal transduction mechanisms	Protein tyrosine and serine/threonine kinase;; Protein kinase domain	Mitogen-activated protein kinase kinase 1 OS=Arabidopsis thaliana OX=3702 GN=MKK1 PE=1 SV=2	Protein kinase domain-containing protein (Fragment) OS=Volvox carteri f. nagariensis OX=3068 GN=VOLCADRAFT_47055 PE=4 SV=1	--	--	epidermal growth factor receptor-like, partial [Rhodamnia argentea]
BMK_Unigene_138277	--	--	Molecular Function: peroxidase activity (GO:0004601);; Cellular Component: extracellular region (GO:0005576);; Biological Process: response to oxidative stress (GO:0006979);; Molecular Function: heme binding (GO:0020037);; Biological Process: hydrogen peroxide catabolic process (GO:0042744);; Molecular Function: metal ion binding (GO:0046872);;	K00430|2.1e-190|zju:107411439|K00430 peroxidase [EC:1.11.1.7] | (RefSeq) peroxidase 19	--	--	Peroxidase	Peroxidase 19 OS=Arabidopsis thaliana OX=3702 GN=PER19 PE=2 SV=1	Peroxidase OS=Morus notabilis OX=981085 GN=L484_008867 PE=3 SV=1	Q	Secondary metabolites biosynthesis, transport and catabolism	peroxidase 19 [Ziziphus jujuba]
BMK_Unigene_155245	--	--	Biological Process: positive regulation of growth (GO:0045927);;	K18081|1.0e-46|bna:106425271|K18081 myotubularin-related protein 1/2 [EC:3.1.3.64 3.1.3.95] | (RefSeq) phosphatidylinositol-3-phosphatase myotubularin-2-like	--	--	Protein of unknown function (DUF668)	--	Uncharacterized protein OS=Trema orientale OX=63057 GN=TorRG33x02_306850 PE=4 SV=1	S	Function unknown	uncharacterized protein LOC107432128 [Ziziphus jujuba]
BMK_Unigene_075221	--	--	Cellular Component: integral component of membrane (GO:0016021);;	--	--	--	CemA family	Chloroplast envelope membrane protein OS=Zea mays OX=4577 GN=cemA PE=3 SV=1	Chloroplast envelope membrane protein OS=Carpinus fangiana OX=176857 GN=FH972_012886 PE=3 SV=1	U	Intracellular trafficking, secretion, and vesicular transport	chloroplast envelope membrane protein [Ziziphus jujuba]
BMK_Unigene_148526	--	--	--	K03283|1.8e-33|cann:107854185|K03283 heat shock 70kDa protein 1/2/6/8 | (RefSeq) heat shock cognate 70 kDa protein 2-like	--	--	Lecithin retinol acyltransferase	Protein LEAD-SENSITIVE 1 OS=Arabidopsis thaliana OX=3702 GN=PSE1 PE=2 SV=1	LRAT domain-containing protein OS=Prunus yedoensis var. nudiflora OX=2094558 GN=Pyn_26787 PE=4 SV=1	S	Function unknown	uncharacterized protein LOC107404583 isoform X2 [Ziziphus jujuba]
BMK_Unigene_104420	[C]	Energy production and conversion	Cellular Component: mitochondrial inner membrane (GO:0005743);; Molecular Function: ubiquinol-cytochrome-c reductase activity (GO:0008121);; Molecular Function: electron transfer activity (GO:0009055);; Cellular Component: membrane (GO:0016020);; Cellular Component: integral component of membrane (GO:0016021);; Molecular Function: oxidoreductase activity (GO:0016491);; Biological Process: respira…	K00412|4.8e-48|mis:MicpuN_mit31|K00412 ubiquinol-cytochrome c reductase cytochrome b subunit | (RefSeq) cob; apocytochrome b	[C]	Energy production and conversion	--	Cytochrome b OS=Oryza sativa subsp. indica OX=39946 GN=MT-CYB PE=3 SV=1	Cytochrome b OS=Rhodogorgon sp. OX=2485824 GN=CYTB PE=3 SV=1	C	Energy production and conversion	cytochrome b [Ministeria vibrans]
BMK_Unigene_075845	--	--	Cellular Component: integral component of membrane (GO:0016021);;	--	--	--	--	--	Uncharacterized protein OS=Parasponia andersonii OX=3476 GN=PanWU01x14_185920 PE=4 SV=1	--	--	uncharacterized protein LOC107431398 isoform X1 [Ziziphus jujuba]
BMK_Unigene_125301	[J]	Translation, ribosomal structure and biogenesis	Molecular Function: structural constituent of ribosome (GO:0003735);; Cellular Component: ribosome (GO:0005840);; Biological Process: translation (GO:0006412);;	K02915|3.7e-26|qsu:112002461|K02915 large subunit ribosomal protein L34e | (RefSeq) 60S ribosomal protein L34-A-like	[J]	Translation, ribosomal structure and biogenesis	Ribosomal protein L34e	60S ribosomal protein L34 OS=Nicotiana tabacum OX=4097 GN=RPL34 PE=2 SV=1	60S ribosomal protein L34 (Fragment) OS=Anthurium amnicola OX=1678845 GN=RpL34_0 PE=3 SV=1	J	Translation, ribosomal structure and biogenesis	predicted protein [Hordeum vulgare subsp. vulgare]
BMK_Unigene_146503	--	--	Molecular Function: metal ion binding (GO:0046872);;	K13811|6.7e-31|bdi:100837643|K13811 3'-phosphoadenosine 5'-phosphosulfate synthase [EC:2.7.7.4 2.7.1.25] | (RefSeq) LOW QUALITY PROTEIN: ATP sulfurylase 2	[R]	General function prediction only	Zn-finger in Ran binding protein and others;; Zn-finger in Ran binding protein and others	--	Uncharacterized protein OS=Prunus persica OX=3760 GN=PRUPE_7G167400 PE=4 SV=1	S	Function unknown	uncharacterized protein LOC107424403 isoform X4 [Ziziphus jujuba]
BMK_Unigene_145300	--	--	Cellular Component: integral component of membrane (GO:0016021);;	--	--	--	--	--	Uncharacterized protein OS=Fagus sylvatica OX=28930 GN=FSB_LOCUS12483 PE=4 SV=1	--	--	uncharacterized protein LOC107432685 [Ziziphus jujuba]
BMK_Unigene_147262	[G]	Carbohydrate transport and metabolism	Molecular Function: molecular_function (GO:0003674);; Molecular Function: catalytic activity (GO:0003824);; Molecular Function: ribulose-phosphate 3-epimerase activity (GO:0004750);; Molecular Function: binding (GO:0005488);; Cellular Component: cellular_component (GO:0005575);; Cellular Component: intracellular (GO:0005622);; Cellular Component: obsolete cell (GO:0005623);; Cellular Component: c…	K01783|1.2e-64|zju:107427843|K01783 ribulose-phosphate 3-epimerase [EC:5.1.3.1] | (RefSeq) ribulose-phosphate 3-epimerase, cytoplasmic isoform isoform X1	[G]	Carbohydrate transport and metabolism	Ribulose-phosphate 3 epimerase family;; Ribulose-phosphate 3 epimerase family	Ribulose-phosphate 3-epimerase, cytoplasmic isoform OS=Oryza sativa subsp. japonica OX=39947 GN=Os09g0505700 PE=1 SV=1	Ribulose-phosphate 3-epimerase OS=Hevea brasiliensis OX=3981 GN=GH714_041820 PE=3 SV=1	G	Carbohydrate transport and metabolism	ribulose-phosphate 3-epimerase, cytoplasmic isoform isoform X2 [Ziziphus jujuba]
BMK_Unigene_139940	[I]	Lipid transport and metabolism	Molecular Function: methyltransferase activity (GO:0008168);; Biological Process: methylation (GO:0032259);;	K13396|1.4e-11|psom:113295244|K13396 (S)-tetrahydroprotoberberine N-methyltransferase [EC:2.1.1.122] | (RefSeq) (S)-tetrahydroprotoberberine N-methyltransferase	--	--	Mycolic acid cyclopropane synthetase	(S)-coclaurine N-methyltransferase OS=Thalictrum flavum subsp. glaucum OX=150095 PE=1 SV=1	(S)-coclaurine N-methyltransferase-like isoform X1 OS=Capsicum annuum OX=4072 GN=LOC107851996 PE=4 SV=1	M	Cell wall/membrane/envelope biogenesis	(S)-coclaurine N-methyltransferase-like [Ziziphus jujuba]
BMK_Unigene_316261	[T]	Signal transduction mechanisms	Molecular Function: protein kinase activity (GO:0004672);; Molecular Function: ATP binding (GO:0005524);; Biological Process: protein phosphorylation (GO:0006468);;	K08838|4.5e-15|gsl:Gasu_58740|K08838 serine/threonine-protein kinase 24/25/MST4 [EC:2.7.11.1] | (RefSeq) serine/threonine protein kinase isoform 1	[T]	Signal transduction mechanisms	Protein kinase domain;; Protein tyrosine and serine/threonine kinase	Serine/threonine-protein kinase STY13 OS=Arabidopsis thaliana OX=3702 GN=STY13 PE=1 SV=2	Serine/threonine-protein kinase pakC OS=Gracilariopsis chorda OX=448386 GN=BWQ96_06317 PE=4 SV=1	T	Signal transduction mechanisms	hypothetical protein BOTBODRAFT_30328 [Botryobasidium botryosum FD-172 SS1]
BMK_Unigene_068035	--	--	Molecular Function: methyltransferase activity (GO:0008168);; Cellular Component: integral component of membrane (GO:0016021);; Biological Process: methylation (GO:0032259);;	K23872|1.0e-10|ccaj:109802127|K23872 putative homogalacturonan methyltransferase [EC:2.1.1.-] | (RefSeq) probable methyltransferase PMT13	--	--	--	Probable methyltransferase PMT14 OS=Arabidopsis thaliana OX=3702 GN=At4g18030 PE=2 SV=1	Methyltransferase OS=Ensete ventricosum OX=4639 GN=B296_00037194 PE=3 SV=1	S	Function unknown	hypothetical protein BHE74_00035249 [Ensete ventricosum]
BMK_Unigene_156629	--	--	--	--	--	--	--	--	Uncharacterized protein OS=Morus notabilis OX=981085 GN=L484_015487 PE=4 SV=1	S	Function unknown	uncharacterized protein LOC107419093 [Ziziphus jujuba]
BMK_Unigene_160550	--	--	--	K12177|1.0e-06|nnu:104594682|K12177 COP9 signalosome complex subunit 3 | (RefSeq) COP9 signalosome complex subunit 3-like	--	--	--	--	--	--	--	--
BMK_Unigene_148655	--	--	--	--	--	--	--	--	Uncharacterized protein OS=Morus notabilis OX=981085 GN=L484_022467 PE=4 SV=1	--	--	hypothetical protein FNV43_RR18231 [Rhamnella rubrinervis]
BMK_Unigene_153568	--	--	--	--	--	--	--	--	Uncharacterized protein OS=Mikania micrantha OX=192012 GN=E3N88_39087 PE=4 SV=1	--	--	uncharacterized protein LOC114299969 isoform X2 [Camellia sinensis]
BMK_Unigene_142086	[Q]	Secondary metabolites biosynthesis, transport and catabolism	Molecular Function: metal ion binding (GO:0046872);; Molecular Function: dioxygenase activity (GO:0051213);;	K23947|5.7e-100|zju:107424257|K23947 2-oxoglutarate-dependent dioxygenase [EC:1.14.11.-] | (RefSeq) 2-oxoglutarate-dependent dioxygenase DAO-like	[QR]	--	non-haem dioxygenase in morphine synthesis N-terminal;; 2OG-Fe(II) oxygenase superfamily	2-oxoglutarate-dependent dioxygenase DAO OS=Oryza sativa subsp. indica OX=39946 GN=DAO PE=3 SV=1	2-oxoglutarate-dependent dioxygenase DAO-like OS=Juglans regia OX=51240 GN=LOC109014014 PE=3 SV=1	Q	Secondary metabolites biosynthesis, transport and catabolism	2-oxoglutarate-dependent dioxygenase DAO-like [Ziziphus jujuba]
BMK_Unigene_109227	--	--	Molecular Function: structural constituent of cuticle (GO:0042302);;	--	[W]	Extracellular structures	Nematode cuticle collagen N-terminal domain	--	--	--	--	--
BMK_Unigene_066798	--	--	--	--	--	--	--	--	--	--	--	glycine-rich protein 5-like [Ziziphus jujuba]
BMK_Unigene_112282	--	--	--	--	--	--	NADH-ubiquinone reductase complex 1 MLRQ subunit	--	--	--	--	hypothetical protein M407DRAFT_242911 [Tulasnella calospora MUT 4182]
BMK_Unigene_195863	--	--	Molecular Function: cysteine-type peptidase activity (GO:0008234);;	--	--	--	Cathepsin propeptide inhibitor domain (I29)	--	Xylem cysteine proteinase 2 (Fragment) OS=Noccaea caerulescens OX=107243 GN=MP_TR25639_c1_g1_i1_g.74864 PE=3 SV=1	--	--	--
BMK_Unigene_324447	[O]	Posttranslational modification, protein turnover, chaperones	Biological Process: reproduction (GO:0000003);; Biological Process: nuclear division (GO:0000280);; Biological Process: urogenital system development (GO:0001655);; Biological Process: kidney development (GO:0001822);; Molecular Function: molecular_function (GO:0003674);; Molecular Function: binding (GO:0005488);; Molecular Function: protein binding (GO:0005515);; Cellular Component: cellular_com…	K12158|5.1e-07|ppp:112277490|K12158 ubiquitin-like protein Nedd8 | (RefSeq) ubiquitin-NEDD8-like protein RUB1	[DO]	--	Ubiquitin family;; Ubiquitin-2 like Rad60 SUMO-like	--	Ubiquitin-like domain-containing protein OS=Phytophthora fragariae OX=53985 GN=PF001_g1875 PE=4 SV=1	O	Posttranslational modification, protein turnover, chaperones	hypothetical protein PR002_g8164 [Phytophthora rubi]
BMK_Unigene_166572	--	--	--	--	--	--	--	--	--	--	--	hypothetical protein M407DRAFT_33030 [Tulasnella calospora MUT 4182]
BMK_Unigene_000812	--	--	--	--	[S]	Function unknown	Domain of unknown function (DUF4210)	--	PREDICTED: FAM214B OS=Prunus dulcis OX=3755 GN=ALMOND_2B012293 PE=4 SV=1	S	Function unknown	uncharacterized protein LOC107418103 isoform X2 [Ziziphus jujuba]
BMK_Unigene_001023	--	--	Cellular Component: endoplasmic reticulum membrane (GO:0005789);; Cellular Component: integral component of membrane (GO:0016021);;	K13989|8.2e-105|zju:107432799|K13989 Derlin-2/3 | (RefSeq) derlin-1	[S]	Function unknown	Der1-like family	Derlin-1 OS=Arabidopsis thaliana OX=3702 GN=DER1 PE=2 SV=1	Derlin OS=Prunus persica OX=3760 GN=PRUPE_ppa010620mg PE=3 SV=1	S	Function unknown	derlin-1 [Ziziphus jujuba]
BMK_Unigene_082362	[L]	Replication, recombination and repair	Molecular Function: DNA binding (GO:0003677);; Molecular Function: DNA ligase (ATP) activity (GO:0003910);; Molecular Function: ATP binding (GO:0005524);; Biological Process: DNA replication (GO:0006260);; Biological Process: DNA recombination (GO:0006310);; Biological Process: DNA ligation involved in DNA repair (GO:0051103);; Biological Process: DNA biosynthetic process (GO:0071897);;	K10777|8.2e-164|fve:101303509|K10777 DNA ligase 4 [EC:6.5.1.1] | (RefSeq) DNA ligase 4	[L]	Replication, recombination and repair	DNA ligase N terminus;; ATP dependent DNA ligase domain	DNA ligase 4 OS=Arabidopsis thaliana OX=3702 GN=LIG4 PE=1 SV=1	DNA ligase OS=Parasponia andersonii OX=3476 GN=PanWU01x14_184600 PE=3 SV=1	L	Replication, recombination and repair	hypothetical protein FNV43_RR03180 [Rhamnella rubrinervis]
BMK_Unigene_147004	--	--	Molecular Function: methyltransferase activity (GO:0008168);; Biological Process: methylation (GO:0032259);;	K21804|5.9e-68|zju:107419629|K21804 protein N-lysine methyltransferase METTL21A [EC:2.1.1.-] | (RefSeq) protein N-lysine methyltransferase METTL21A	[A]	RNA processing and modification	Lysine methyltransferase	--	Uncharacterized protein OS=Citrus sinensis OX=2711 GN=CISIN_1g023543mg PE=4 SV=1	A	RNA processing and modification	protein N-lysine methyltransferase METTL21A [Ziziphus jujuba]
BMK_Unigene_098702	--	--	Molecular Function: peroxidase activity (GO:0004601);; Cellular Component: extracellular region (GO:0005576);; Biological Process: response to oxidative stress (GO:0006979);; Molecular Function: heme binding (GO:0020037);; Biological Process: hydrogen peroxide catabolic process (GO:0042744);; Molecular Function: metal ion binding (GO:0046872);;	K00430|4.7e-59|cann:107860772|K00430 peroxidase [EC:1.11.1.7] | (RefSeq) peroxidase 55	--	--	Peroxidase	Peroxidase 55 OS=Arabidopsis thaliana OX=3702 GN=PER55 PE=1 SV=1	Peroxidase OS=Nyssa sinensis OX=561372 GN=F0562_004806 PE=3 SV=1	Q	Secondary metabolites biosynthesis, transport and catabolism	hypothetical protein F0562_004806 [Nyssa sinensis]
BMK_Unigene_121419	--	--	--	--	--	--	--	--	--	--	--	hypothetical protein M407DRAFT_133853 [Tulasnella calospora MUT 4182]
BMK_Unigene_057085	--	--	Cellular Component: cellular_component (GO:0005575);; Cellular Component: intracellular (GO:0005622);; Cellular Component: obsolete cell (GO:0005623);; Cellular Component: cytoplasm (GO:0005737);; Cellular Component: plasma membrane (GO:0005886);; Cellular Component: integral component of plasma membrane (GO:0005887);; Cellular Component: cell cortex (GO:0005938);; Biological Process: cell commun…	--	--	--	--	--	WAT1-related protein OS=Prunus yedoensis var. nudiflora OX=2094558 GN=Pyn_11824 PE=3 SV=1	S	Function unknown	hypothetical protein FNV43_RR19831 [Rhamnella rubrinervis]
BMK_Unigene_148755	[R]	General function prediction only	Molecular Function: ATP binding (GO:0005524);; Molecular Function: lyase activity (GO:0016829);; Molecular Function: ATPase activity (GO:0016887);;	K06158|4.0e-217|zju:107429832|K06158 ATP-binding cassette, subfamily F, member 3 | (RefSeq) ABC transporter F family member 3	[EJ]	--	ABC transporter;; ABC transporter;; ABC transporter;; ABC transporter;; ABC transporter	ABC transporter F family member 3 OS=Arabidopsis thaliana OX=3702 GN=ABCF3 PE=1 SV=1	Phosphonate C-P lyase system OS=Trema orientale OX=63057 GN=TorRG33x02_114510 PE=4 SV=1	--	--	ABC transporter F family member 3 [Ziziphus jujuba]
BMK_Unigene_150343	[Q]	Secondary metabolites biosynthesis, transport and catabolism	Molecular Function: homogentisate 1,2-dioxygenase activity (GO:0004411);; Biological Process: L-phenylalanine catabolic process (GO:0006559);; Biological Process: tyrosine metabolic process (GO:0006570);;	K00451|2.8e-263|zju:107432562|K00451 homogentisate 1,2-dioxygenase [EC:1.13.11.5] | (RefSeq) homogentisate 1,2-dioxygenase isoform X1	[E]	Amino acid transport and metabolism	homogentisate 1,2-dioxygenase	Homogentisate 1,2-dioxygenase OS=Arabidopsis thaliana OX=3702 GN=HGO PE=2 SV=2	Homogentisate 1,2-dioxygenase OS=Trema orientale OX=63057 GN=TorRG33x02_056240 PE=3 SV=1	E	Amino acid transport and metabolism	homogentisate 1,2-dioxygenase isoform X1 [Ziziphus jujuba]
BMK_Unigene_320974	--	--	Molecular Function: nucleotide binding (GO:0000166);; Molecular Function: nucleoside binding (GO:0001882);; Molecular Function: purine nucleoside binding (GO:0001883);; Molecular Function: molecular_function (GO:0003674);; Molecular Function: catalytic activity (GO:0003824);; Molecular Function: GTPase activity (GO:0003924);; Molecular Function: binding (GO:0005488);; Molecular Function: GTP bind…	K07836|7.5e-13|qsu:111998772|K07836 Ras-related protein Rap-1B | (RefSeq) ras-related protein Rap-1-like	[R]	General function prediction only	Ras family;; Ras of Complex, Roc, domain of DAPkinase	GTP-binding protein yptV5 OS=Volvox carteri OX=3067 GN=YPTV5 PE=3 SV=1	Ras protein let60 putative OS=Albugo laibachii Nc14 OX=890382 GN=AlNc14C5G779 PE=4 SV=1	S	Function unknown	Ras-like protein [Wickerhamiella sorbophila]
BMK_Unigene_082807	[M]	Cell wall/membrane/envelope biogenesis	Molecular Function: kinase activity (GO:0016301);;	K00924|1.9e-90|mus:103987754|K00924 kinase [EC:2.7.1.-] | (RefSeq) receptor-like protein kinase HSL1	--	--	Protein kinase domain;; Protein tyrosine and serine/threonine kinase;; Leucine rich repeat;; Leucine Rich repeats (2 copies);; Leucine rich repeat N-terminal domain;; Leucine Rich Repeat	LRR receptor-like serine/threonine-protein kinase HSL2 OS=Arabidopsis thaliana OX=3702 GN=HSL2 PE=1 SV=1	LRR receptor-like serine/threonine-protein kinase HSL2 OS=Morella rubra OX=262757 GN=CJ030_MR1G006190 PE=3 SV=1	T	Signal transduction mechanisms	LRR receptor-like serine/threonine-protein kinase HSL2 [Ziziphus jujuba]
BMK_Unigene_083164	[R]	General function prediction only	Molecular Function: methyltransferase activity (GO:0008168);; Cellular Component: integral component of membrane (GO:0016021);; Biological Process: methylation (GO:0032259);;	--	[R]	General function prediction only	Methyltransferase domain;; Cephalosporin hydroxylase	--	S-adenosyl-L-methionine-dependent methyltransferase OS=Parasponia andersonii OX=3476 GN=PanWU01x14_041080 PE=4 SV=1	S	Function unknown	hypothetical protein FNV43_RR18084 [Rhamnella rubrinervis]
BMK_Unigene_125248	[J]	Translation, ribosomal structure and biogenesis	Molecular Function: structural constituent of ribosome (GO:0003735);; Cellular Component: ribosome (GO:0005840);; Biological Process: translation (GO:0006412);;	K02894|7.1e-63|soe:110788904|K02894 large subunit ribosomal protein L23e | (RefSeq) 60S ribosomal protein L23	[J]	Translation, ribosomal structure and biogenesis	Ribosomal protein L14p/L23e	60S ribosomal protein L23 OS=Nicotiana tabacum OX=4097 GN=RPL23 PE=2 SV=1	60S ribosomal protein L23 (Fragment) OS=Anthurium amnicola OX=1678845 GN=RpL23_0 PE=3 SV=1	J	Translation, ribosomal structure and biogenesis	60S ribosomal protein L23 [Spinacia oleracea]
BMK_Unigene_075934	--	--	Molecular Function: protein binding (GO:0005515);;	--	--	--	BTB/POZ domain	BTB/POZ domain-containing protein At3g05675 OS=Arabidopsis thaliana OX=3702 GN=At3g05675 PE=2 SV=1	Voltage dependent potassium channel OS=Trema orientale OX=63057 GN=TorRG33x02_114350 PE=4 SV=1	S	Function unknown	BTB/POZ domain-containing protein At3g05675-like isoform X1 [Ziziphus jujuba]
BMK_Unigene_150238	[FR]	--	Molecular Function: hydrolase activity, acting on carbon-nitrogen (but not peptide) bonds (GO:0016810);;	K01487|2.6e-17|qsu:112022104|K01487 guanine deaminase [EC:3.5.4.3] | (RefSeq) probable guanine deaminase	[FQ]	--	Amidohydrolase family;; Amidohydrolase family;; Amidohydrolase family;; Amidohydrolase family	--	Amidohydro-rel domain-containing protein OS=Fagus sylvatica OX=28930 GN=FSB_LOCUS29250 PE=4 SV=1	--	--	uncharacterized protein LOC107417623 [Ziziphus jujuba]
BMK_Unigene_068310	--	--	Molecular Function: ATP transmembrane transporter activity (GO:0005347);; Cellular Component: integral component of membrane (GO:0016021);;	K14684|2.5e-199|zju:107430119|K14684 solute carrier family 25 (mitochondrial phosphate transporter), member 23/24/25/41 | (RefSeq) mitochondrial adenine nucleotide transporter ADNT1-like	[C]	Energy production and conversion	Mitochondrial carrier protein	Mitochondrial adenine nucleotide transporter ADNT1 OS=Arabidopsis thaliana OX=3702 GN=ADNT1 PE=1 SV=1	Mitochondrial substrate carrier family protein B OS=Morus notabilis OX=981085 GN=L484_012067 PE=3 SV=1	C	Energy production and conversion	mitochondrial adenine nucleotide transporter ADNT1-like [Ziziphus jujuba]
BMK_Unigene_069740	--	--	Biological Process: signal transduction (GO:0007165);; Molecular Function: ADP binding (GO:0043531);;	K00695|1.7e-22|mtr:MTR_6g478030|K00695 sucrose synthase [EC:2.4.1.13] | (RefSeq) sucrose synthase	--	--	NB-ARC domain	Disease resistance protein Roq1 OS=Nicotiana benthamiana OX=4100 GN=ROQ1 PE=1 SV=1	ADP-ribosyl cyclase/cyclic ADP-ribose hydrolase OS=Trema orientale OX=63057 GN=TorTNL14 PE=4 SV=1	J	Translation, ribosomal structure and biogenesis	disease resistance-like protein DSC1 [Ziziphus jujuba]
BMK_Unigene_077654	[U]	Intracellular trafficking, secretion, and vesicular transport	Molecular Function: protein kinase activity (GO:0004672);; Molecular Function: ATP binding (GO:0005524);;	K08286|6.2e-260|zju:107429339|K08286 protein-serine/threonine kinase [EC:2.7.11.-] | (RefSeq) protein kinase PINOID 2	[R]	General function prediction only	Protein kinase domain;; Protein tyrosine and serine/threonine kinase	Protein kinase PINOID 2 OS=Oryza sativa subsp. japonica OX=39947 GN=PID2 PE=2 SV=1	PREDICTED: serine/threonine-kinase OS=Prunus dulcis OX=3755 GN=ALMOND_2B010698 PE=4 SV=1	T	Signal transduction mechanisms	protein kinase PINOID 2 [Ziziphus jujuba]
BMK_Unigene_151774	[Q]	Secondary metabolites biosynthesis, transport and catabolism	Cellular Component: integral component of membrane (GO:0016021);;	K20359|1.3e-110|zju:107431087|K20359 PRA1 family protein 1 | (RefSeq) PRA1 family protein B4	[U]	Intracellular trafficking, secretion, and vesicular transport	PRA1 family protein;; Macrophage migration inhibitory factor (MIF)	PRA1 family protein B4 OS=Arabidopsis thaliana OX=3702 GN=PRA1B4 PE=1 SV=1	PRA1 family protein OS=Trema orientale OX=63057 GN=TorRG33x02_098220 PE=3 SV=1	U	Intracellular trafficking, secretion, and vesicular transport	PRA1 family protein B4 [Ziziphus jujuba]
BMK_Unigene_146248	[C]	Energy production and conversion	Molecular Function: monooxygenase activity (GO:0004497);; Molecular Function: iron ion binding (GO:0005506);; Molecular Function: oxidoreductase activity, acting on paired donors, with incorporation or reduction of molecular oxygen (GO:0016705);; Molecular Function: heme binding (GO:0020037);;	K23810|1.2e-174|vvi:100232891|K23810 (E)-8-carboxylinalool synthase [EC:1.14.14.-] | (RefSeq) GFH2; ripening-related P-450 enzyme-like	[Q]	Secondary metabolites biosynthesis, transport and catabolism	Cytochrome P450;; NADH ubiquinone oxidoreductase, 20 Kd subunit;; Respiratory-chain NADH dehydrogenase, 30 Kd subunit	Geraniol 8-hydroxylase OS=Swertia mussotii OX=137888 GN=CYP76B10 PE=1 SV=1	Geraniol 8-hydroxylase OS=Prunus yedoensis var. nudiflora OX=2094558 GN=Pyn_09360 PE=3 SV=1	Q	Secondary metabolites biosynthesis, transport and catabolism	geraniol 8-hydroxylase-like [Ziziphus jujuba]
BMK_Unigene_068609	--	--	Cellular Component: Golgi membrane (GO:0000139);; Biological Process: retrograde vesicle-mediated transport, Golgi to endoplasmic reticulum (GO:0006890);; Biological Process: protein transport (GO:0015031);; Cellular Component: COPI vesicle coat (GO:0030126);;	--	--	--	--	--	Coatomer subunit zeta OS=Glycine soja OX=3848 GN=D0Y65_021190 PE=3 SV=1	--	--	hypothetical protein E2542_SST14453 [Spatholobus suberectus]
BMK_Unigene_082937	[G]	Carbohydrate transport and metabolism	Molecular Function: polygalacturonase activity (GO:0004650);; Cellular Component: extracellular region (GO:0005576);; Biological Process: carbohydrate metabolic process (GO:0005975);; Biological Process: cell wall organization (GO:0071555);;	K01184|7.7e-172|pper:18782466|K01184 polygalacturonase [EC:3.2.1.15] | (RefSeq) polygalacturonase At1g48100	--	--	Glycosyl hydrolases family 28;; Pectate lyase superfamily protein	Polygalacturonase At1g48100 OS=Arabidopsis thaliana OX=3702 GN=At1g48100 PE=2 SV=1	Pectate_lyase_3 domain-containing protein OS=Prunus persica OX=3760 GN=PRUPE_1G251200 PE=3 SV=1	G	Carbohydrate transport and metabolism	polygalacturonase At1g48100 [Ziziphus jujuba]
BMK_Unigene_054885	--	--	Molecular Function: structural constituent of ribosome (GO:0003735);; Cellular Component: ribosome (GO:0005840);; Biological Process: translation (GO:0006412);;	K02983|2.4e-18|cre:CHLREDRAFT_132716|K02983 small subunit ribosomal protein S30e | (RefSeq) RPS30; ribosomal protein S30	[OR]	--	Ribosomal protein S30;; Ubiquitin family	40S ribosomal protein S30 OS=Arabidopsis thaliana OX=3702 GN=RPS30A PE=3 SV=3	40S ribosomal protein S30 (Fragment) OS=Anthurium amnicola OX=1678845 GN=fau PE=3 SV=1	J	Translation, ribosomal structure and biogenesis	hypothetical protein SARC_05259 [Sphaeroforma arctica JP610]
BMK_Unigene_119712	[J]	Translation, ribosomal structure and biogenesis	Molecular Function: RNA binding (GO:0003723);; Molecular Function: structural constituent of ribosome (GO:0003735);; Cellular Component: ribosome (GO:0005840);; Biological Process: translation (GO:0006412);;	K02964|1.6e-67|thj:104806767|K02964 small subunit ribosomal protein S18e | (RefSeq) 40S ribosomal protein S18-like	[J]	Translation, ribosomal structure and biogenesis	Ribosomal protein S13/S18	40S ribosomal protein S18 OS=Arabidopsis thaliana OX=3702 GN=RPS18A PE=1 SV=1	Uncharacterized protein OS=Papaver somniferum OX=3469 GN=C5167_008532 PE=3 SV=1	J	Translation, ribosomal structure and biogenesis	PREDICTED: 40S ribosomal protein S18-like [Tarenaya hassleriana]
BMK_Unigene_155437	--	--	--	--	--	--	--	--	Uncharacterized protein OS=Carpinus fangiana OX=176857 GN=FH972_013945 PE=4 SV=1	S	Function unknown	uncharacterized protein LOC107406955 isoform X2 [Ziziphus jujuba]
BMK_Unigene_155465	--	--	Molecular Function: nucleotide binding (GO:0000166);; Molecular Function: nucleic acid binding (GO:0003676);; Molecular Function: 3'-5' exonuclease activity (GO:0008408);; Cellular Component: integral component of membrane (GO:0016021);;	K12951|0.0e+00|zju:107403923|K12951 cobalt/nickel-transporting P-type ATPase D [EC:7.2.2.-] | (RefSeq) protein RRP6-like 3 isoform X1	[J]	Translation, ribosomal structure and biogenesis	HRDC domain;; 3'-5' exonuclease;; 3'-5' exonuclease	Protein RRP6-like 3 OS=Arabidopsis thaliana OX=3702 GN=RRP6L3 PE=2 SV=1	Ribonuclease D OS=Trema orientale OX=63057 GN=TorRG33x02_203850 PE=4 SV=1	J	Translation, ribosomal structure and biogenesis	protein RRP6-like 3 isoform X2 [Ziziphus jujuba]
BMK_Unigene_072890	--	--	Cellular Component: endoplasmic reticulum membrane (GO:0005789);; Cellular Component: integral component of membrane (GO:0016021);;	K20721|1.9e-29|ccaj:109795156|K20721 reticulon-1 | (RefSeq) reticulon-like protein B1	[U]	Intracellular trafficking, secretion, and vesicular transport	Reticulon	Reticulon-like protein B8 OS=Arabidopsis thaliana OX=3702 GN=RTNLB8 PE=2 SV=1	Reticulon-like protein (Fragment) OS=Davidia involucrata OX=16924 GN=Din_026732 PE=4 SV=1	U	Intracellular trafficking, secretion, and vesicular transport	reticulon-like protein B8 [Ziziphus jujuba]
BMK_Unigene_081894	[M]	Cell wall/membrane/envelope biogenesis	Biological Process: GPI anchor biosynthetic process (GO:0006506);; Cellular Component: integral component of membrane (GO:0016021);;	K03857|5.2e-241|zju:107429062|K03857 phosphatidylinositol N-acetylglucosaminyltransferase subunit A [EC:2.4.1.198] | (RefSeq) phosphatidylinositol N-acetylglucosaminyltransferase subunit A isoform X2	[MOI]	--	PIGA (GPI anchor biosynthesis);; Glycosyltransferase Family 4;; Glycosyl transferases group 1;; Glycosyl transferases group 1;; Glycosyl transferase 4-like domain;; Glycosyl transferases group 1	Phosphatidylinositol N-acetylglucosaminyltransferase subunit A OS=Arabidopsis thaliana OX=3702 GN=PIGA PE=2 SV=1	GlcNAc-PI synthesis protein OS=Carpinus fangiana OX=176857 GN=FH972_020869 PE=4 SV=1	--	--	phosphatidylinositol N-acetylglucosaminyltransferase subunit A isoform X1 [Ziziphus jujuba]
BMK_Unigene_072363	--	--	Cellular Component: ubiquitin ligase complex (GO:0000151);; Biological Process: protein polyubiquitination (GO:0000209);; Molecular Function: molecular_function (GO:0003674);; Molecular Function: catalytic activity (GO:0003824);; Molecular Function: ubiquitin-protein transferase activity (GO:0004842);; Molecular Function: signaling receptor binding (GO:0005102);; Molecular Function: binding (GO:0…	K11971|4.0e-78|zju:107431170|K11971 E3 ubiquitin-protein ligase RNF14 [EC:2.3.2.31] | (RefSeq) E3 ubiquitin-protein ligase RNF14-like isoform X1	--	--	--	--	E3 ubiquitin-protein ligase RNF14 OS=Juglans regia OX=51240 GN=LOC109019042 PE=3 SV=1	O	Posttranslational modification, protein turnover, chaperones	E3 ubiquitin-protein ligase RNF14-like isoform X1 [Ziziphus jujuba]
BMK_Unigene_142839	--	--	--	--	--	--	Universal stress protein family	--	uncharacterized protein LOC109020739 OS=Juglans regia OX=51240 GN=LOC109020739 PE=4 SV=1	S	Function unknown	uncharacterized protein LOC107403630 [Ziziphus jujuba]
BMK_Unigene_117040	--	--	Cellular Component: ribosome (GO:0005840);;	K02947|4.3e-29|qsu:112000702|K02947 small subunit ribosomal protein S10e | (RefSeq) 40S ribosomal protein S10-A-like	[J]	Translation, ribosomal structure and biogenesis	Plectin/S10 domain	40S ribosomal protein S10-1 OS=Arabidopsis thaliana OX=3702 GN=RPS10A PE=1 SV=1	40S ribosomal protein S10b (Fragment) OS=Anthurium amnicola OX=1678845 GN=RpS10b_2 PE=4 SV=1	J	Translation, ribosomal structure and biogenesis	putative 40s ribosomal protein s10b [Phaeomoniella chlamydospora]
BMK_Unigene_159010	--	--	Cellular Component: cellular_component (GO:0005575);; Cellular Component: intracellular (GO:0005622);; Cellular Component: obsolete cell (GO:0005623);; Cellular Component: cytoplasm (GO:0005737);; Cellular Component: mitochondrion (GO:0005739);; Cellular Component: mitochondrial envelope (GO:0005740);; Cellular Component: mitochondrial inner membrane (GO:0005743);; Cellular Component: mitochondri…	--	--	--	--	NADH dehydrogenase [ubiquinone] 1 beta subcomplex subunit 2 OS=Arabidopsis thaliana OX=3702 GN=At1g76200 PE=3 SV=1	Uncharacterized protein OS=Arabidopsis thaliana OX=3702 GN=AXX17_At1g70660 PE=4 SV=1	C	Energy production and conversion	NADH dehydrogenase ubiquinone 1 beta subcomplex subunit [Arabidopsis thaliana]
BMK_Unigene_079527	--	--	Molecular Function: nucleic acid binding (GO:0003676);; Cellular Component: chloroplast (GO:0009507);; Cellular Component: plastid chromosome (GO:0009508);;	--	--	--	--	--	S1 motif domain-containing protein OS=Prunus persica OX=3760 GN=PRUPE_5G155500 PE=4 SV=1	--	--	protein PLASTID TRANSCRIPTIONALLY ACTIVE 10 isoform X1 [Ziziphus jujuba]
BMK_Unigene_309165	--	--	Biological Process: reproduction (GO:0000003);; Biological Process: developmental process involved in reproduction (GO:0003006);; Molecular Function: GTPase activity (GO:0003924);; Molecular Function: hydrolase activity, hydrolyzing O-glycosyl compounds (GO:0004553);; Molecular Function: GTP binding (GO:0005525);; Cellular Component: cellular_component (GO:0005575);; Cellular Component: cell wall…	K12852|5.5e-27|qsu:112013325|K12852 116 kDa U5 small nuclear ribonucleoprotein component | (RefSeq) 116 kDa U5 small nuclear ribonucleoprotein component-like	[J]	Translation, ribosomal structure and biogenesis	Elongation factor Tu GTP binding domain	109 kDa U5 small nuclear ribonucleoprotein component GFL OS=Arabidopsis thaliana OX=3702 GN=GFL PE=2 SV=1	Uncharacterized protein OS=Carpinus fangiana OX=176857 GN=FH972_025821 PE=3 SV=1	J	Translation, ribosomal structure and biogenesis	hypothetical protein M407DRAFT_10128 [Tulasnella calospora MUT 4182]
BMK_Unigene_146399	--	--	--	--	--	--	--	--	--	--	--	uncharacterized protein LOC107417199 isoform X2 [Ziziphus jujuba]
BMK_Unigene_150476	--	--	Molecular Function: aspartic-type endopeptidase activity (GO:0004190);; Cellular Component: integral component of membrane (GO:0016021);;	K00924|1.0e-48|gab:108471930|K00924 kinase [EC:2.7.1.-] | (RefSeq) aspartic proteinase-like protein 2 isoform X1	[O]	Posttranslational modification, protein turnover, chaperones	Xylanase inhibitor N-terminal;; Eukaryotic aspartyl protease;; Xylanase inhibitor C-terminal	Aspartic proteinase 36 OS=Arabidopsis thaliana OX=3702 GN=A36 PE=1 SV=1	Aspartic peptidase OS=Parasponia andersonii OX=3476 GN=PanWU01x14_196300 PE=3 SV=1	O	Posttranslational modification, protein turnover, chaperones	aspartic proteinase-like protein 2 [Ziziphus jujuba]
BMK_Unigene_154345	--	--	Molecular Function: DNA binding (GO:0003677);; Cellular Component: nucleus (GO:0005634);; Biological Process: DNA replication (GO:0006260);;	K02321|1.6e-171|zju:107428341|K02321 DNA polymerase alpha subunit B | (RefSeq) DNA polymerase alpha subunit B	[L]	Replication, recombination and repair	DNA polymerase alpha/epsilon subunit B	--	DNA polymerase alpha subunit B OS=Trema orientale OX=63057 GN=TorRG33x02_213600 PE=3 SV=1	L	Replication, recombination and repair	DNA polymerase alpha subunit B [Morus notabilis]
BMK_Unigene_156846	--	--	--	--	--	--	--	--	F22G5.2 OS=Arabidopsis thaliana OX=3702 PE=4 SV=1	--	--	F22G5.2 [Arabidopsis thaliana]
BMK_Unigene_082735	--	--	--	--	--	--	--	F-box protein At5g39450 OS=Arabidopsis thaliana OX=3702 GN=At5g39450 PE=2 SV=1	F-box domain containing protein OS=Trema orientale OX=63057 GN=TorRG33x02_219240 PE=4 SV=1	S	Function unknown	F-box protein At5g39450 [Ziziphus jujuba]
BMK_Unigene_157344	--	--	Molecular Function: protein binding (GO:0005515);;	--	--	--	Kazal-type serine protease inhibitor domain;; Kazal-type serine protease inhibitor domain	--	Uncharacterized protein OS=Chlamydomonas reinhardtii OX=3055 GN=CHLRE_14g632400v5 PE=4 SV=1	S	Function unknown	hypothetical protein MNEG_5932 [Monoraphidium neglectum]
BMK_Unigene_322699	--	--	--	--	--	--	GRF zinc finger	--	--	--	--	hypothetical protein DL765_007631 [Monosporascus sp. GIB2]
BMK_Unigene_070788	--	--	--	--	--	--	--	--	Uncharacterized protein OS=Punica granatum OX=22663 GN=CDL15_Pgr003194 PE=4 SV=1	--	--	uncharacterized protein LOC107409706 [Ziziphus jujuba]
BMK_Unigene_127858	[J]	Translation, ribosomal structure and biogenesis	Molecular Function: structural constituent of ribosome (GO:0003735);; Cellular Component: ribosome (GO:0005840);; Biological Process: translation (GO:0006412);;	K02921|1.3e-30|cvr:CHLNCDRAFT_48537|K02921 large subunit ribosomal protein L37Ae | (RefSeq) 60S ribosomal protein L37a	[J]	Translation, ribosomal structure and biogenesis	Ribosomal L37ae protein family	60S ribosomal protein L37a-2 OS=Arabidopsis thaliana OX=3702 GN=RPL37AC PE=3 SV=1	60S ribosomal protein L37a (Fragment) OS=Anthurium amnicola OX=1678845 GN=RpL37A_0 PE=3 SV=1	J	Translation, ribosomal structure and biogenesis	hypothetical protein D9758_015082 [Tetrapyrgos nigripes]
BMK_Unigene_138903	--	--	Molecular Function: peptidyl-prolyl cis-trans isomerase activity (GO:0003755);; Biological Process: response to oxidative stress (GO:0006979);; Cellular Component: integral component of membrane (GO:0016021);;	K10848|1.3e-17|cic:CICLE_v10024418mg|K10848 DNA excision repair protein ERCC-4 [EC:3.1.-.-] | (RefSeq) hypothetical protein	--	--	--	--	Peptidylprolyl isomerase OS=Prunus dulcis OX=3755 GN=Prudu_013762 PE=4 SV=1	S	Function unknown	uncharacterized protein LOC107403302 [Ziziphus jujuba]
BMK_Unigene_072295	--	--	Molecular Function: nucleic acid binding (GO:0003676);; Biological Process: gene silencing by RNA (GO:0031047);;	K11593|1.6e-77|zju:107416299|K11593 eukaryotic translation initiation factor 2C | (RefSeq) protein argonaute 2-like	[J]	Translation, ribosomal structure and biogenesis	N-terminal domain of argonaute	Protein argonaute 2 OS=Arabidopsis thaliana OX=3702 GN=AGO2 PE=1 SV=1	Protein argonaute 2 OS=Morus notabilis OX=981085 GN=L484_006244 PE=3 SV=1	J	Translation, ribosomal structure and biogenesis	protein argonaute 2-like [Ziziphus jujuba]
BMK_Unigene_317614	--	--	--	K03155|3.1e-12|zju:107414617|K03155 timeless | (RefSeq) protein timeless homolog	--	--	--	--	--	--	--	protein timeless homolog [Ziziphus jujuba]
BMK_Unigene_079144	[I]	Lipid transport and metabolism	Molecular Function: hydroxymethylglutaryl-CoA lyase activity (GO:0004419);; Cellular Component: mitochondrion (GO:0005739);; Biological Process: ketone body biosynthetic process (GO:0046951);;	K01640|4.3e-149|zju:107410635|K01640 hydroxymethylglutaryl-CoA lyase [EC:4.1.3.4] | (RefSeq) hydroxymethylglutaryl-CoA lyase, mitochondrial	[CE]	--	HMGL-like;; HMGL-like	Hydroxymethylglutaryl-CoA lyase, mitochondrial OS=Arabidopsis thaliana OX=3702 GN=HMGCL PE=1 SV=2	Pyruvate carboxyltransferase domain-containing protein OS=Carpinus fangiana OX=176857 GN=FH972_009901 PE=4 SV=1	--	--	hydroxymethylglutaryl-CoA lyase, mitochondrial [Ziziphus jujuba]
BMK_Unigene_149512	--	--	--	--	--	--	Protein of unknown function (DUF1084);; Protein of unknown function (DUF1084)	Tobamovirus multiplication protein 1 OS=Nicotiana tabacum OX=4097 GN=TOM1 PE=1 SV=1	Uncharacterized protein OS=Hevea brasiliensis OX=3981 GN=GH714_037306 PE=3 SV=1	S	Function unknown	tobamovirus multiplication protein 1 [Ziziphus jujuba]
BMK_Unigene_180931	--	--	--	--	--	--	PAP2 superfamily	--	--	--	--	--
BMK_Unigene_081026	--	--	Molecular Function: DNA-binding transcription factor activity (GO:0003700);; Cellular Component: nucleus (GO:0005634);; Cellular Component: host cell nucleus (GO:0042025);; Molecular Function: sequence-specific DNA binding (GO:0043565);;	K09419|1.4e-230|zju:107417231|K09419 heat shock transcription factor, other eukaryote | (RefSeq) heat stress transcription factor A-4c-like	[K]	Transcription	HSF-type DNA-binding	Heat stress transcription factor A-4b OS=Oryza sativa subsp. japonica OX=39947 GN=HSFA4B PE=2 SV=1	Heat stress transcription factor A-4b OS=Morus notabilis OX=981085 GN=L484_001396 PE=3 SV=1	K	Transcription	heat stress transcription factor A-4c-like [Ziziphus jujuba]
BMK_Unigene_068149	--	--	Biological Process: regulation of cyclin-dependent protein serine/threonine kinase activity (GO:0000079);; Cellular Component: male germ cell nucleus (GO:0001673);; Biological Process: regulation of protein phosphorylation (GO:0001932);; Biological Process: negative regulation of protein phosphorylation (GO:0001933);; Molecular Function: molecular_function (GO:0003674);; Molecular Function: enzym…	--	--	--	Cyclin-dependent kinase inhibitor	Cyclin-dependent kinase inhibitor 7 OS=Arabidopsis thaliana OX=3702 GN=KRP7 PE=1 SV=2	Cyclin-dependent kinase inhibitor OS=Trema orientale OX=63057 GN=TorRG33x02_276420 PE=3 SV=1	G	Carbohydrate transport and metabolism	cyclin-dependent kinase inhibitor 7 [Ziziphus jujuba]
BMK_Unigene_144210	--	--	Molecular Function: structural constituent of ribosome (GO:0003735);; Cellular Component: ribosome (GO:0005840);; Biological Process: translation (GO:0006412);;	K22683|3.7e-110|zju:107416111|K22683 aspartyl protease family protein [EC:3.4.23.-] | (RefSeq) aspartyl protease family protein 2	[J]	Translation, ribosomal structure and biogenesis	Ribosomal proteins 50S-L18Ae/60S-L20/60S-L18A	60S ribosomal protein L18a OS=Castanea sativa OX=21020 GN=RPL18A PE=2 SV=1	60S ribosomal protein L18a OS=Fagus sylvatica OX=28930 GN=FSB_LOCUS1369 PE=3 SV=1	J	Translation, ribosomal structure and biogenesis	aspartyl protease family protein 2 [Ziziphus jujuba]
BMK_Unigene_075927	--	--	Molecular Function: protein serine/threonine kinase activity (GO:0004674);; Molecular Function: ATP binding (GO:0005524);;	K08857|3.9e-225|zju:107412173|K08857 NIMA (never in mitosis gene a)-related kinase 1/4/5 [EC:2.7.11.1] | (RefSeq) serine/threonine-protein kinase Nek3	[R]	General function prediction only	--	Serine/threonine-protein kinase Nek2 OS=Arabidopsis thaliana OX=3702 GN=NEK2 PE=2 SV=1	Protein kinase domain-containing protein OS=Prunus persica OX=3760 GN=PRUPE_6G341100 PE=4 SV=1	T	Signal transduction mechanisms	serine/threonine-protein kinase Nek3 [Ziziphus jujuba]
BMK_Unigene_078392	[IR]	--	Cellular Component: integral component of membrane (GO:0016021);; Molecular Function: hydrolase activity, acting on ester bonds (GO:0016788);;	K01206|8.0e-100|thj:104825554|K01206 alpha-L-fucosidase [EC:3.2.1.51] | (RefSeq) alpha-L-fucosidase 3	--	--	GDSL-like Lipase/Acylhydrolase	Esterase OS=Hevea brasiliensis OX=3981 PE=1 SV=1	Lipase (Fragment) OS=Parasponia andersonii OX=3476 GN=PanWU01x14_247550 PE=3 SV=1	S	Function unknown	esterase-like isoform X5 [Ziziphus jujuba]
BMK_Unigene_284766	--	--	--	--	[A]	RNA processing and modification	--	--	--	--	--	--
BMK_Unigene_116216	--	--	--	--	--	--	--	--	Uncharacterized protein (Fragment) OS=Genlisea aurea OX=192259 GN=M569_12098 PE=4 SV=1	--	--	hypothetical protein M569_12098, partial [Genlisea aurea]
BMK_Unigene_149810	[I]	Lipid transport and metabolism	--	K18368|1.5e-194|zju:107426333|K18368 caffeoylshikimate esterase [EC:3.1.1.-] | (RefSeq) caffeoylshikimate esterase-like	[I]	Lipid transport and metabolism	Serine aminopeptidase, S33;; alpha/beta hydrolase fold;; Alpha/beta hydrolase family;; Prolyl oligopeptidase family	Caffeoylshikimate esterase OS=Arabidopsis thaliana OX=3702 GN=CSE PE=1 SV=1	Hydrolase_4 domain-containing protein OS=Prunus persica OX=3760 GN=PRUPE_8G261500 PE=4 SV=1	I	Lipid transport and metabolism	caffeoylshikimate esterase-like [Ziziphus jujuba]
BMK_Unigene_140823	--	--	Molecular Function: protein serine/threonine kinase activity (GO:0004674);; Molecular Function: ATP binding (GO:0005524);; Cellular Component: integral component of membrane (GO:0016021);; Biological Process: recognition of pollen (GO:0048544);;	K13415|7.8e-51|psom:113330628|K13415 protein brassinosteroid insensitive 1 [EC:2.7.10.1 2.7.11.1] | (RefSeq) protein BRASSINOSTEROID INSENSITIVE 1-like	--	--	Protein kinase domain;; Protein tyrosine and serine/threonine kinase;; D-mannose binding lectin	Putative receptor protein kinase ZmPK1 OS=Zea mays OX=4577 GN=PK1 PE=2 SV=2	Receptor-like serine/threonine-protein kinase OS=Davidia involucrata OX=16924 GN=Din_040818 PE=3 SV=1	T	Signal transduction mechanisms	LOW QUALITY PROTEIN: putative receptor protein kinase ZmPK1 [Ziziphus jujuba]
BMK_Unigene_153130	--	--	--	--	--	--	--	--	--	--	--	hypothetical protein CSIM01_03906 [Colletotrichum simmondsii]
BMK_Unigene_101576	[P]	Inorganic ion transport and metabolism	Molecular Function: superoxide dismutase activity (GO:0004784);; Molecular Function: metal ion binding (GO:0046872);;	K04565|1.9e-61|qsu:111998169|K04565 superoxide dismutase, Cu-Zn family [EC:1.15.1.1] | (RefSeq) superoxide dismutase [Cu-Zn]	[P]	Inorganic ion transport and metabolism	Copper/zinc superoxide dismutase (SODC)	Superoxide dismutase [Cu-Zn] OS=Solidago canadensis var. scabra OX=59294 GN=SODCC PE=2 SV=3	Superoxide dismutase [Cu-Zn] OS=Anthurium amnicola OX=1678845 GN=SODCP_6 PE=3 SV=1	P	Inorganic ion transport and metabolism	unnamed protein product [Fusarium graminearum]
BMK_Unigene_078897	--	--	Cellular Component: integral component of membrane (GO:0016021);;	--	--	--	Protein BYPASS1-related	Protein ROH1 OS=Arabidopsis thaliana OX=3702 GN=ROH1 PE=1 SV=1	Uncharacterized protein OS=Vitis vinifera OX=29760 GN=VIT_18s0072g00550 PE=4 SV=1	S	Function unknown	uncharacterized protein LOC107421668 [Ziziphus jujuba]
BMK_Unigene_128011	--	--	Molecular Function: lipid binding (GO:0008289);;	--	[I]	Lipid transport and metabolism	Lipocalin / cytosolic fatty-acid binding protein family;; Lipocalin / cytosolic fatty-acid binding protein family	--	Fatty acid-binding protein, muscle (Fragment) OS=Anthurium amnicola OX=1678845 GN=FABPM PE=4 SV=1	--	--	--
BMK_Unigene_007253	--	--	--	--	--	--	von Willebrand factor type D domain	--	--	--	--	--
BMK_Unigene_277551	--	--	--	--	--	--	Agglutinin C-terminal;; Ricin-type beta-trefoil lectin C-terminal domain	--	--	--	--	carbohydrate-binding module family 13 protein [Tulasnella calospora MUT 4182]
BMK_Unigene_065679	--	--	Molecular Function: phosphoprotein phosphatase activity (GO:0004721);;	K04382|2.6e-44|zju:107433926|K04382 serine/threonine-protein phosphatase 2A catalytic subunit [EC:3.1.3.16] | (RefSeq) serine/threonine-protein phosphatase PP2A-4 catalytic subunit isoform X1	[T]	Signal transduction mechanisms	Calcineurin-like phosphoesterase	Serine/threonine-protein phosphatase PP2A-4 catalytic subunit OS=Arabidopsis thaliana OX=3702 GN=PP2A4 PE=1 SV=1	Serine/threonine-protein phosphatase OS=Parasponia andersonii OX=3476 GN=PanWU01x14_250380 PE=3 SV=1	T	Signal transduction mechanisms	serine/threonine-protein phosphatase PP2A-4 catalytic subunit isoform X1 [Ziziphus jujuba]
BMK_Unigene_265422	--	--	--	--	--	--	Mitochondrial and peroxisomal fission factor Mff	--	--	--	--	--
BMK_Unigene_072080	--	--	--	--	--	--	cAMP-regulated phosphoprotein/endosulfine conserved region	--	Uncharacterized protein OS=Carpinus fangiana OX=176857 GN=FH972_008962 PE=3 SV=1	S	Function unknown	uncharacterized protein LOC107428935 [Ziziphus jujuba]
BMK_Unigene_111505	--	--	--	--	[S]	Function unknown	Anticodon-binding domain	--	AD domain-containing protein OS=Auxenochlorella protothecoides OX=3075 GN=g.13175 PE=3 SV=1	S	Function unknown	protein LSM12 homolog [Rhodamnia argentea]
BMK_Unigene_000848	--	--	Molecular Function: ubiquitin-protein transferase activity (GO:0004842);;	K12135|4.2e-28|thj:104802991|K12135 zinc finger protein CONSTANS | (RefSeq) zinc finger protein CONSTANS-LIKE 2-like	--	--	Armadillo/beta-catenin-like repeat;; U-box domain;; Late embryogenesis abundant protein;; B-box zinc finger;; Protein of unknown function (DUF1308)	U-box domain-containing protein 38 OS=Arabidopsis thaliana OX=3702 GN=PUB38 PE=1 SV=1	RING-type E3 ubiquitin transferase OS=Morus notabilis OX=981085 GN=L484_006408 PE=4 SV=1	H	Coenzyme transport and metabolism	U-box domain-containing protein 38 [Ziziphus jujuba]
BMK_Unigene_188619	--	--	--	--	[J]	Translation, ribosomal structure and biogenesis	--	--	--	--	--	--
BMK_Unigene_080806	--	--	Molecular Function: nucleoside transmembrane transporter activity (GO:0005337);; Cellular Component: integral component of membrane (GO:0016021);;	K15014|2.0e-213|zju:107416952|K15014 solute carrier family 29 (equilibrative nucleoside transporter), member 1/2/3 | (RefSeq) equilibrative nucleotide transporter 3-like isoform X1	[F]	Nucleotide transport and metabolism	Nucleoside transporter	Equilibrative nucleotide transporter 3 OS=Arabidopsis thaliana OX=3702 GN=ENT3 PE=1 SV=1	Equilibrative nucleoside transporter OS=Trema orientale OX=63057 GN=TorENT2 PE=3 SV=1	F	Nucleotide transport and metabolism	equilibrative nucleotide transporter 3-like isoform X1 [Ziziphus jujuba]
BMK_Unigene_143893	[F]	Nucleotide transport and metabolism	Molecular Function: adenylate kinase activity (GO:0004017);; Molecular Function: ATP binding (GO:0005524);;	K00939|3.4e-100|zju:107421496|K00939 adenylate kinase [EC:2.7.4.3] | (RefSeq) adenylate kinase, chloroplastic	[F]	Nucleotide transport and metabolism	Adenylate kinase;; AAA domain	Adenylate kinase 2, chloroplastic OS=Arabidopsis thaliana OX=3702 GN=At5g47840 PE=1 SV=1	ATP:AMP phosphotransferase OS=Rosa chinensis OX=74649 GN=RchiOBHm_Chr7g0226671 PE=3 SV=1	F	Nucleotide transport and metabolism	adenylate kinase, chloroplastic [Ziziphus jujuba]
BMK_Unigene_147405	--	--	Molecular Function: transcription coactivator activity (GO:0003713);; Biological Process: regulation of transcription by RNA polymerase II (GO:0006357);; Cellular Component: mediator complex (GO:0016592);;	K13528|2.2e-123|zju:107424081|K13528 mediator of RNA polymerase II transcription subunit 20 | (RefSeq) mediator of RNA polymerase II transcription subunit 20a-like isoform X1	[E]	Amino acid transport and metabolism	TATA-binding related factor (TRF) of subunit 20 of Mediator complex	Mediator of RNA polymerase II transcription subunit 20a OS=Arabidopsis thaliana OX=3702 GN=MED20A PE=1 SV=1	Mediator of RNA polymerase II transcription subunit 20 OS=Prunus persica OX=3760 GN=MED20 PE=3 SV=1	E	Amino acid transport and metabolism	mediator of RNA polymerase II transcription subunit 20a-like isoform X1 [Ziziphus jujuba]
BMK_Unigene_104817	--	--	Cellular Component: extracellular region (GO:0005576);; Biological Process: bone remodeling (GO:0046849);;	--	--	--	Secreted phosphoprotein 24 (Spp-24) cystatin-like domain;; Cathelicidin	--	--	--	--	--
BMK_Unigene_080222	--	--	Molecular Function: RNA binding (GO:0003723);;	K18666|2.0e-254|zju:107428538|K18666 activating signal cointegrator complex subunit 1 | (RefSeq) uncharacterized protein LOC107428538 isoform X1	[K]	Transcription	KH domain;; AKAP7 2'5' RNA ligase-like domain;; AKAP7 2'5' RNA ligase-like domain	--	Activating signal cointegrator 1 complex subunit 1 OS=Morella rubra OX=262757 GN=CJ030_MR3G026412 PE=4 SV=1	K	Transcription	uncharacterized protein LOC107428538 isoform X1 [Ziziphus jujuba]
BMK_Unigene_079427	--	--	Cellular Component: integral component of membrane (GO:0016021);;	K13466|8.5e-10|hbr:110645737|K13466 EIX receptor 1/2 | (RefSeq) probable leucine-rich repeat receptor-like protein kinase At1g35710	[R]	General function prediction only	Leucine rich repeat;; Leucine Rich repeats (2 copies);; Leucine Rich Repeat	Receptor-like protein 6 OS=Arabidopsis thaliana OX=3702 GN=RLP6 PE=3 SV=1	Putative leucine-rich repeat-containing, plant-type, leucine-rich repeat domain, L OS=Rosa chinensis OX=74649 GN=RchiOBHm_Chr1g0347571 PE=4 SV=1	T	Signal transduction mechanisms	receptor-like protein 7 [Ziziphus jujuba]
BMK_Unigene_075810	--	--	Molecular Function: DNA binding (GO:0003677);; Cellular Component: nucleus (GO:0005634);; Biological Process: regulation of transcription, DNA-templated (GO:0006355);; Biological Process: lipid transport (GO:0006869);; Molecular Function: lipid binding (GO:0008289);; Biological Process: auxin-activated signaling pathway (GO:0009734);;	K14486|1.9e-28|soe:110798056|K14486 auxin response factor | (RefSeq) auxin response factor 5	--	--	--	Auxin response factor 6 OS=Arabidopsis thaliana OX=3702 GN=ARF6 PE=1 SV=2	Multifunctional fusion protein OS=Morus notabilis OX=981085 GN=L484_012709 PE=3 SV=1	K	Transcription	auxin response factor 6-like [Ziziphus jujuba]
BMK_Unigene_185965	--	--	Biological Process: formation of cytoplasmic translation initiation complex (GO:0001732);; Molecular Function: molecular_function (GO:0003674);; Molecular Function: nucleic acid binding (GO:0003676);; Molecular Function: RNA binding (GO:0003723);; Molecular Function: mRNA binding (GO:0003729);; Molecular Function: translation initiation factor activity (GO:0003743);; Molecular Function: binding (…	K03252|8.4e-09|csat:104781507|K03252 translation initiation factor 3 subunit C | (RefSeq) eukaryotic translation initiation factor 3 subunit C-like isoform X1	[J]	Translation, ribosomal structure and biogenesis	Eukaryotic translation initiation factor 3 subunit 8 N-terminus	Eukaryotic translation initiation factor 3 subunit C OS=Arabidopsis thaliana OX=3702 GN=TIF3C1 PE=1 SV=2	Eukaryotic translation initiation factor 3 subunit C OS=Cucumis melo var. makuwa OX=1194695 GN=E6C27_scaffold84G00330 PE=3 SV=1	J	Translation, ribosomal structure and biogenesis	eukaryotic translation initiation factor 3 subunit C-like [Rhodamnia argentea]
BMK_Unigene_120405	[E]	Amino acid transport and metabolism	Molecular Function: molecular_function (GO:0003674);; Molecular Function: catalytic activity (GO:0003824);; Molecular Function: binding (GO:0005488);; Molecular Function: drug binding (GO:0008144);; Molecular Function: transaminase activity (GO:0008483);; Biological Process: biosynthetic process (GO:0009058);; Molecular Function: methionine-oxo-acid transaminase activity (GO:0010326);; Molecular …	K14264|2.0e-48|qsu:112019006|K14264 kynurenine aminotransferase [EC:2.6.1.7] | (RefSeq) uncharacterized aminotransferase C6B12.04c-like	[E]	Amino acid transport and metabolism	Aminotransferase class I and II	--	Aminotran_1_2 domain-containing protein OS=Guillardia theta (strain CCMP2712) OX=905079 GN=GUITHDRAFT_159025 PE=4 SV=1	E	Amino acid transport and metabolism	hypothetical protein M407DRAFT_246229 [Tulasnella calospora MUT 4182]
BMK_Unigene_153643	[L]	Replication, recombination and repair	Molecular Function: ubiquitin-protein transferase activity (GO:0004842);;	K10260|3.5e-17|ota:OT_ostta09g00430|K10260 F-box and WD-40 domain protein 7 | (RefSeq) WD40/YVTN repeat-like-containing domain	[S]	Function unknown	U-box domain;; Armadillo/beta-catenin-like repeat	U-box domain-containing protein 16 OS=Arabidopsis thaliana OX=3702 GN=PUB16 PE=2 SV=1	RING-type E3 ubiquitin transferase OS=Trema orientale OX=63057 GN=TorRG33x02_098950 PE=4 SV=1	S	Function unknown	hypothetical protein FNV43_RR08686 [Rhamnella rubrinervis]
BMK_Unigene_265121	[L]	Replication, recombination and repair	Molecular Function: blue light photoreceptor activity (GO:0009882);;	K12119|1.6e-70|ath:AT1G04400|K12119 cryptochrome 2 | (RefSeq) CRY2; cryptochrome 2	[LT]	--	DNA photolyase	Cryptochrome-2 OS=Arabidopsis thaliana OX=3702 GN=CRY2 PE=1 SV=2	Cryptochrome 2 OS=Arabidopsis thaliana OX=3702 GN=CRY2 PE=3 SV=1	--	--	AT-PHH1 [Arabidopsis thaliana]
BMK_Unigene_085912	--	--	Cellular Component: cellular_component (GO:0005575);; Cellular Component: extracellular region (GO:0005576);; Cellular Component: cell wall (GO:0005618);; Cellular Component: obsolete cell (GO:0005623);; Cellular Component: external encapsulating structure (GO:0030312);; Cellular Component: obsolete cell part (GO:0044464);; Molecular Function: nutrient reservoir activity (GO:0045735);; Cellular C…	--	--	--	Cupin;; Cupin domain	Auxin-binding protein ABP19a OS=Prunus persica OX=3760 GN=ABP19A PE=3 SV=1	Auxin-binding protein ABP19a OS=Hibiscus syriacus OX=106335 GN=F3Y22_tig00111640pilonHSYRG00204 PE=3 SV=1	S	Function unknown	hypothetical protein CMV_017143 [Castanea mollissima]
BMK_Unigene_144522	--	--	Cellular Component: integral component of membrane (GO:0016021);;	--	--	--	Family of unknown function (DUF716)	--	Transmembrane protein 45A-like OS=Pyrus ussuriensis x Pyrus communis OX=2448454 GN=D8674_040337 PE=3 SV=1	S	Function unknown	transmembrane protein 45A-like [Ziziphus jujuba]
BMK_Unigene_223823	--	--	Cellular Component: nucleus (GO:0005634);; Biological Process: protein import into nucleus (GO:0006606);; Molecular Function: Ran GTPase binding (GO:0008536);;	--	--	--	--	--	Importin subunit beta-1 OS=Gracilariopsis chorda OX=448386 GN=BWQ96_06307 PE=4 SV=1	--	--	Importin subunit beta-1 [Gracilariopsis chorda]
BMK_Unigene_146337	[O]	Posttranslational modification, protein turnover, chaperones	Molecular Function: thioredoxin-disulfide reductase activity (GO:0004791);; Cellular Component: cytoplasm (GO:0005737);; Biological Process: removal of superoxide radicals (GO:0019430);;	K00384|2.7e-266|zju:107431646|K00384 thioredoxin reductase (NADPH) [EC:1.8.1.9] | (RefSeq) NADPH-dependent thioredoxin reductase 3 isoform X1	[O]	Posttranslational modification, protein turnover, chaperones	Pyridine nucleotide-disulphide oxidoreductase;; Pyridine nucleotide-disulphide oxidoreductase;; Pyridine nucleotide-disulphide oxidoreductase;; FAD dependent oxidoreductase;; FAD binding domain;; HI0933-like protein;; Glucose inhibited division protein A	NADPH-dependent thioredoxin reductase 3 OS=Arabidopsis thaliana OX=3702 GN=NTRC PE=1 SV=2	Thioredoxin reductase OS=Trema orientale OX=63057 GN=TorRG33x02_172760 PE=3 SV=1	O	Posttranslational modification, protein turnover, chaperones	NADPH-dependent thioredoxin reductase 3 isoform X1 [Ziziphus jujuba]
BMK_Unigene_156024	[T]	Signal transduction mechanisms	Molecular Function: phosphorelay sensor kinase activity (GO:0000155);; Biological Process: regulation of transcription, DNA-templated (GO:0006355);; Biological Process: detection of visible light (GO:0009584);; Biological Process: red, far-red light phototransduction (GO:0009585);; Molecular Function: photoreceptor activity (GO:0009881);; Biological Process: protein-tetrapyrrole linkage (GO:00170…	K12123|0.0e+00|zju:107413117|K12123 phytochrome E | (RefSeq) phytochrome E isoform X6	--	--	Phytochrome region;; PAS fold;; PAS fold;; GAF domain;; His Kinase A (phospho-acceptor) domain;; PAS fold;; Histidine kinase-, DNA gyrase B-, and HSP90-like ATPase	Phytochrome E OS=Ipomoea nil OX=35883 GN=PHYE PE=2 SV=1	Phytochrome OS=Trema orientale OX=63057 GN=TorRG33x02_192030 PE=3 SV=1	T	Signal transduction mechanisms	phytochrome E isoform X6 [Ziziphus jujuba]
BMK_Unigene_070526	--	--	--	--	--	--	--	Probable transcription factor KAN2 OS=Arabidopsis thaliana OX=3702 GN=KAN2 PE=2 SV=1	Putative transcription factor KAN2 OS=Morella rubra OX=262757 GN=CJ030_MR4G026977 PE=4 SV=1	K	Transcription	probable transcription factor KAN2 isoform X1 [Ziziphus jujuba]
BMK_Unigene_080038	--	--	Cellular Component: cellular_component (GO:0005575);; Cellular Component: intracellular (GO:0005622);; Cellular Component: obsolete cell (GO:0005623);; Cellular Component: cytoplasm (GO:0005737);; Cellular Component: obsolete intracellular part (GO:0044424);; Cellular Component: obsolete cell part (GO:0044464);;	K20285|2.5e-71|smo:SELMODRAFT_424453|K20285 Rab9 effector protein with kelch motifs | (RefSeq) hypothetical protein	[R]	General function prediction only	Galactose oxidase, central domain;; Galactose oxidase, central domain;; Kelch motif;; Kelch motif;; Kelch motif;; Kelch motif	Acyl-CoA-binding domain-containing protein 4 OS=Arabidopsis thaliana OX=3702 GN=ACBP4 PE=1 SV=1	BTB-kelch protein OS=Trema orientale OX=63057 GN=TorRG33x02_258570 PE=4 SV=1	S	Function unknown	uncharacterized protein LOC107419037 [Ziziphus jujuba]
BMK_Unigene_079096	--	--	--	K13525|4.4e-07|aip:107621123|K13525 transitional endoplasmic reticulum ATPase | (RefSeq) cell division cycle protein 48 homolog	--	--	Formin Homology 2 Domain;; Formin Homology 2 Domain	Formin-like protein 18 OS=Arabidopsis thaliana OX=3702 GN=FH18 PE=2 SV=3	Formin-like protein OS=Trema orientale OX=63057 GN=TorRG33x02_050850 PE=3 SV=1	S	Function unknown	hypothetical protein FNV43_RR11381 [Rhamnella rubrinervis]
BMK_Unigene_169824	--	--	Molecular Function: protein binding (GO:0005515);;	--	[T]	Signal transduction mechanisms	Fz domain	--	--	--	--	--
BMK_Unigene_151982	--	--	Molecular Function: nucleic acid binding (GO:0003676);;	--	--	--	Alba	Uncharacterized protein At2g34160 OS=Arabidopsis thaliana OX=3702 GN=At2g34160 PE=1 SV=1	Alba domain-containing protein OS=Morus notabilis OX=981085 GN=L484_022390 PE=4 SV=1	S	Function unknown	uncharacterized protein At2g34160-like [Ziziphus jujuba]
BMK_Unigene_123830	--	--	--	--	--	--	--	--	Uncharacterized protein OS=Malus baccata OX=106549 GN=C1H46_009111 PE=4 SV=1	--	--	PREDICTED: extensin-3-like [Pyrus x bretschneideri]
BMK_Unigene_146677	[H]	Coenzyme transport and metabolism	Molecular Function: O-methyltransferase activity (GO:0008171);; Biological Process: methylation (GO:0032259);; Molecular Function: protein dimerization activity (GO:0046983);;	K16040|5.7e-126|qsu:112015373|K16040 trans-resveratrol di-O-methyltransferase [EC:2.1.1.240] | (RefSeq) trans-resveratrol di-O-methyltransferase-like	[R]	General function prediction only	O-methyltransferase domain;; Dimerisation domain	Trans-resveratrol di-O-methyltransferase OS=Vitis vinifera OX=29760 GN=ROMT PE=1 SV=2	Tabersonine 16-O-methyltransferase OS=Morus notabilis OX=981085 GN=L484_010545 PE=3 SV=1	S	Function unknown	trans-resveratrol di-O-methyltransferase-like [Ziziphus jujuba]
BMK_Unigene_150130	--	--	Biological Process: fucose metabolic process (GO:0006004);; Cellular Component: integral component of membrane (GO:0016021);; Molecular Function: transferase activity, transferring glycosyl groups (GO:0016757);;	K23280|3.3e-53|lja:Lj0g3v0048529.1|K23280 rhamnogalacturonan I rhamnosyltransferase [EC:2.4.1.351] | (RefSeq) Lj0g3v0048529.1; -	--	--	GDP-fucose protein O-fucosyltransferase	O-fucosyltransferase 8 OS=Arabidopsis thaliana OX=3702 GN=OFUT8 PE=2 SV=1	O-fucosyltransferase family protein OS=Trema orientale OX=63057 GN=TorRG33x02_169100 PE=3 SV=1	G	Carbohydrate transport and metabolism	O-fucosyltransferase 8-like isoform X3 [Ziziphus jujuba]
BMK_Unigene_154541	[T]	Signal transduction mechanisms	Molecular Function: protein serine/threonine kinase activity (GO:0004674);; Molecular Function: ATP binding (GO:0005524);; Biological Process: signal transduction (GO:0007165);;	K12761|2.7e-187|pavi:110768399|K12761 carbon catabolite-derepressing protein kinase [EC:2.7.11.1] | (RefSeq) CBL-interacting serine/threonine-protein kinase 14	[T]	Signal transduction mechanisms	Protein kinase domain;; Protein tyrosine and serine/threonine kinase;; NAF domain;; Kinase-like	CBL-interacting serine/threonine-protein kinase 14 OS=Arabidopsis thaliana OX=3702 GN=CIPK14 PE=1 SV=1	Non-specific serine/threonine protein kinase OS=Prunus yedoensis var. nudiflora OX=2094558 GN=Pyn_40264 PE=3 SV=1	T	Signal transduction mechanisms	CBL-interacting serine/threonine-protein kinase 14 [Ziziphus jujuba]
BMK_Unigene_082428	--	--	Cellular Component: nuclear pore (GO:0005643);; Cellular Component: integral component of membrane (GO:0016021);; Molecular Function: structural constituent of nuclear pore (GO:0017056);;	K14297|0.0e+00|zju:107409041|K14297 nuclear pore complex protein Nup98-Nup96 | (RefSeq) nuclear pore complex protein NUP96	[YU]	--	Nuclear protein 96;; Nucleoporin autopeptidase	Nuclear pore complex protein NUP96 OS=Arabidopsis thaliana OX=3702 GN=NUP96 PE=1 SV=1	Peptidase OS=Trema orientale OX=63057 GN=TorRG33x02_232200 PE=4 SV=1	--	--	nuclear pore complex protein NUP96 [Ziziphus jujuba]
BMK_Unigene_140509	--	--	Cellular Component: integral component of membrane (GO:0016021);;	--	--	--	--	--	Uncharacterized protein OS=Brachypodium distachyon OX=15368 GN=BRADI_3g02990v3 PE=4 SV=1	S	Function unknown	hypothetical protein DAI22_02g027000 [Oryza sativa Japonica Group]
BMK_Unigene_138606	[C]	Energy production and conversion	Molecular Function: molecular_function (GO:0003674);; Molecular Function: catalytic activity (GO:0003824);; Cellular Component: cellular_component (GO:0005575);; Cellular Component: intracellular (GO:0005622);; Cellular Component: obsolete cell (GO:0005623);; Cellular Component: cytoplasm (GO:0005737);; Biological Process: cellular aromatic compound metabolic process (GO:0006725);; Biological Pro…	K18010|8.0e-112|zju:107422620|K18010 7-hydroxymethyl chlorophyll a reductase [EC:1.17.7.2] | (RefSeq) 7-hydroxymethyl chlorophyll a reductase, chloroplastic	--	--	Coenzyme F420 hydrogenase/dehydrogenase, beta subunit N-term	7-hydroxymethyl chlorophyll a reductase, chloroplastic OS=Arabidopsis thaliana OX=3702 GN=HCAR PE=1 SV=1	7-hydroxymethyl chlorophyll a reductase OS=Pyrus ussuriensis x Pyrus communis OX=2448454 GN=D8674_010181 PE=4 SV=1	C	Energy production and conversion	7-hydroxymethyl chlorophyll a reductase, chloroplastic [Ziziphus jujuba]
BMK_Unigene_000602	--	--	Cellular Component: photosystem II (GO:0009523);; Cellular Component: chloroplast thylakoid (GO:0009534);; Biological Process: photosynthesis (GO:0015979);; Cellular Component: integral component of membrane (GO:0016021);; Molecular Function: manganese ion binding (GO:0030145);; Biological Process: cell redox homeostasis (GO:0045454);;	K02723|1.1e-100|zju:107428525|K02723 photosystem II PsbY protein | (RefSeq) photosystem II core complex proteins psbY, chloroplastic	[K]	Transcription	Photosystem II protein Y (PsbY);; GATA zinc finger	Photosystem II core complex proteins psbY, chloroplastic OS=Spinacia oleracea OX=3562 GN=PSBY PE=1 SV=2	Uncharacterized protein OS=Vitis vinifera OX=29760 GN=VIT_01s0137g00210 PE=3 SV=1	S	Function unknown	photosystem II core complex proteins psbY, chloroplastic [Ziziphus jujuba]
BMK_Unigene_003953	--	--	Molecular Function: ligand-gated ion channel activity (GO:0015276);; Cellular Component: integral component of membrane (GO:0016021);;	K05387|8.6e-123|zju:107417070|K05387 glutamate receptor, ionotropic, plant | (RefSeq) glutamate receptor 3.4-like	[PET]	--	Receptor family ligand binding region	Glutamate receptor 3.4 OS=Arabidopsis thaliana OX=3702 GN=GLR3.4 PE=2 SV=2	Glutamate receptor OS=Trema orientale OX=63057 GN=TorRG33x02_204060 PE=3 SV=1	--	--	glutamate receptor 3.4-like [Ziziphus jujuba]
BMK_Unigene_079135	--	--	Molecular Function: chaperone binding (GO:0051087);;	--	[T]	Signal transduction mechanisms	BAG domain	BAG family molecular chaperone regulator 1 OS=Arabidopsis thaliana OX=3702 GN=BAG1 PE=1 SV=1	Molecular chaperone regulator OS=Trema orientale OX=63057 GN=TorRG33x02_292730 PE=4 SV=1	T	Signal transduction mechanisms	BAG family molecular chaperone regulator 1-like [Ziziphus jujuba]
BMK_Unigene_069309	--	--	--	--	--	--	Protein of unknown function, DUF538	--	Uncharacterized protein OS=Punica granatum OX=22663 GN=CRG98_011291 PE=4 SV=1	S	Function unknown	uncharacterized protein LOC107411730 [Ziziphus jujuba]
BMK_Unigene_162941	[C]	Energy production and conversion	Biological Process: cellular aldehyde metabolic process (GO:0006081);; Molecular Function: oxidoreductase activity, acting on the aldehyde or oxo group of donors, NAD or NADP as acceptor (GO:0016620);;	K00128|1.6e-23|dzi:111299735|K00128 aldehyde dehydrogenase (NAD+) [EC:1.2.1.3] | (RefSeq) aldehyde dehydrogenase family 3 member H1-like isoform X1	[C]	Energy production and conversion	Aldehyde dehydrogenase family	Aldehyde dehydrogenase family 3 member I1, chloroplastic OS=Arabidopsis thaliana OX=3702 GN=ALDH3I1 PE=1 SV=2	Aldehyde dehydrogenase OS=Mikania micrantha OX=192012 GN=E3N88_25441 PE=3 SV=1	C	Energy production and conversion	aldehyde dehydrogenase type III-PG [Capsaspora owczarzaki ATCC 30864]
BMK_Unigene_080794	[G]	Carbohydrate transport and metabolism	Molecular Function: protein serine/threonine kinase activity (GO:0004674);; Cellular Component: plasma membrane (GO:0005886);; Cellular Component: integral component of membrane (GO:0016021);; Biological Process: protein autophosphorylation (GO:0046777);;	K10406|8.2e-10|ini:109150325|K10406 kinesin family member C2/C3 | (RefSeq) kinesin-like protein KIN-14Q	--	--	Malectin domain;; Leucine Rich repeats (2 copies);; Leucine rich repeat;; Leucine Rich Repeat;; Leucine Rich repeat	Probable LRR receptor-like serine/threonine-protein kinase At1g56140 OS=Arabidopsis thaliana OX=3702 GN=At1g56140 PE=2 SV=2	Non-specific serine/threonine protein kinase OS=Vitis vinifera OX=29760 GN=VIT_04s0008g05550 PE=4 SV=1	S	Function unknown	probable LRR receptor-like serine/threonine-protein kinase At1g56130 isoform X2 [Ziziphus jujuba]
BMK_Unigene_143741	--	--	Cellular Component: chloroplast thylakoid membrane (GO:0009535);; Biological Process: photosynthetic electron transport in photosystem I (GO:0009773);; Cellular Component: integral component of membrane (GO:0016021);; Molecular Function: oxidoreductase activity, acting on iron-sulfur proteins as donors (GO:0016730);;	--	--	--	--	PGR5-like protein 1A, chloroplastic OS=Arabidopsis thaliana OX=3702 GN=PGRL1A PE=1 SV=1	PGR5-like protein 1A OS=Parasponia andersonii OX=3476 GN=PanWU01x14_173810 PE=4 SV=1	S	Function unknown	PGR5-like protein 1A, chloroplastic [Ziziphus jujuba]
BMK_Unigene_143829	--	--	--	--	--	--	Immunoglobulin V-set domain;; Immunoglobulin I-set domain	--	--	--	--	--
BMK_Unigene_080276	[QV]	--	Molecular Function: monooxygenase activity (GO:0004497);; Molecular Function: iron ion binding (GO:0005506);; Cellular Component: integral component of membrane (GO:0016021);; Molecular Function: oxidoreductase activity, acting on paired donors, with incorporation or reduction of molecular oxygen (GO:0016705);; Molecular Function: heme binding (GO:0020037);;	K15639|2.8e-148|zju:107428760|K15639 PHYB activation tagged suppressor 1 [EC:1.14.-.-] | (RefSeq) cytochrome P450 CYP749A22-like	[QI]	--	Cytochrome P450;; Cytochrome P450	Cytochrome P450 CYP749A22 OS=Panax ginseng OX=4054 PE=2 SV=1	Cytochrome P450 734A1 OS=Morus notabilis OX=981085 GN=L484_026469 PE=3 SV=1	--	--	cytochrome P450 CYP749A22-like [Ziziphus jujuba]
BMK_Unigene_082776	[O]	Posttranslational modification, protein turnover, chaperones	Molecular Function: ATP binding (GO:0005524);; Cellular Component: cytoplasm (GO:0005737);; Biological Process: response to heat (GO:0009408);; Biological Process: protein refolding (GO:0042026);;	K03695|0.0e+00|zju:107422833|K03695 ATP-dependent Clp protease ATP-binding subunit ClpB | (RefSeq) chaperone protein ClpB4, mitochondrial	[O]	Posttranslational modification, protein turnover, chaperones	AAA domain (Cdc48 subfamily);; C-terminal, D2-small domain, of ClpB protein;; AAA domain (dynein-related subfamily);; ATPase family associated with various cellular activities (AAA);; AAA lid domain;; Sigma-54 interaction domain;; Clp amino terminal domain, pathogenicity island component;; AAA lid domain;; ATPase family associated with various cellular activities (AAA)	Chaperone protein ClpB4, mitochondrial OS=Arabidopsis thaliana OX=3702 GN=CLPB4 PE=2 SV=1	Chaperonin ClpB OS=Trema orientale OX=63057 GN=TorRG33x02_050730 PE=3 SV=1	O	Posttranslational modification, protein turnover, chaperones	hypothetical protein FNV43_RR11392 [Rhamnella rubrinervis]
BMK_Unigene_078852	--	--	Cellular Component: integral component of membrane (GO:0016021);;	K15289|5.5e-155|zju:107421800|K15289 solute carrier family 35, member F5 | (RefSeq) thiamine-repressible mitochondrial transport protein THI74-like	[S]	Function unknown	EamA-like transporter family;; Solute carrier family 35	--	EamA domain containing protein OS=Parasponia andersonii OX=3476 GN=PanWU01x14_074680 PE=3 SV=1	--	--	thiamine-repressible mitochondrial transport protein THI74-like [Ziziphus jujuba]
BMK_Unigene_155847	--	--	--	--	[T]	Signal transduction mechanisms	T-complex protein 11;; Isopentenyl transferase	--	Uncharacterized protein OS=Morus notabilis OX=981085 GN=L484_016720 PE=3 SV=1	T	Signal transduction mechanisms	uncharacterized protein LOC107415193 [Ziziphus jujuba]
BMK_Unigene_152847	[L]	Replication, recombination and repair	Molecular Function: DNA binding (GO:0003677);; Molecular Function: DNA topoisomerase type II (double strand cut, ATP-hydrolyzing) activity (GO:0003918);; Molecular Function: ATP binding (GO:0005524);; Cellular Component: chromosome (GO:0005694);; Biological Process: DNA topological change (GO:0006265);;	K02469|0.0e+00|zju:107412954|K02469 DNA gyrase subunit A [EC:5.6.2.2] | (RefSeq) DNA gyrase subunit A, chloroplastic/mitochondrial isoform X1	[B]	Chromatin structure and dynamics	DNA gyrase/topoisomerase IV, subunit A;; DNA gyrase C-terminal domain, beta-propeller;; DNA gyrase/topoisomerase IV, subunit A	DNA gyrase subunit A, chloroplastic/mitochondrial OS=Nicotiana benthamiana OX=4100 GN=GYRA PE=2 SV=1	DNA topoisomerase (ATP-hydrolyzing) OS=Trema orientale OX=63057 GN=TorRG33x02_230910 PE=3 SV=1	B	Chromatin structure and dynamics	DNA gyrase subunit A, chloroplastic/mitochondrial isoform X2 [Ziziphus jujuba]
BMK_Unigene_083275	[G]	Carbohydrate transport and metabolism	Molecular Function: hydrolase activity, hydrolyzing O-glycosyl compounds (GO:0004553);; Biological Process: carbohydrate metabolic process (GO:0005975);;	K01179|2.0e-162|mus:103970466|K01179 endoglucanase [EC:3.2.1.4] | (RefSeq) endoglucanase 3	--	--	Glycosyl hydrolase family 9;; Glycosyl hydrolase family 9;; Glycosyl hydrolase family 9	Endoglucanase 1 OS=Persea americana OX=3435 GN=CEL1 PE=2 SV=1	Endoglucanase OS=Morella rubra OX=262757 GN=CJ030_MR3G009927 PE=3 SV=1	G	Carbohydrate transport and metabolism	endoglucanase 1-like [Ziziphus jujuba]
BMK_Unigene_134679	--	--	Cellular Component: proton-transporting V-type ATPase, V1 domain (GO:0033180);; Molecular Function: proton-transporting ATP synthase activity, rotational mechanism (GO:0046933);; Molecular Function: proton-transporting ATPase activity, rotational mechanism (GO:0046961);;	--	[C]	Energy production and conversion	Vacuolar ATP synthase subunit S1 (ATP6S1)	--	--	--	--	--
BMK_Unigene_224732	--	--	--	--	[R]	General function prediction only	--	--	--	--	--	--
BMK_Unigene_073115	--	--	Biological Process: cytidine to uridine editing (GO:0016554);;	--	--	--	--	Multiple organellar RNA editing factor 2, chloroplastic OS=Arabidopsis thaliana OX=3702 GN=MORF2 PE=1 SV=1	Uncharacterized protein OS=Parasponia andersonii OX=3476 GN=PanWU01x14_355210 PE=4 SV=1	S	Function unknown	multiple organellar RNA editing factor 2, chloroplastic isoform X1 [Ziziphus jujuba]
BMK_Unigene_144011	[P]	Inorganic ion transport and metabolism	Biological Process: response to reactive oxygen species (GO:0000302);; Molecular Function: peroxidase activity (GO:0004601);; Cellular Component: chloroplast (GO:0009507);; Cellular Component: integral component of membrane (GO:0016021);; Molecular Function: heme binding (GO:0020037);; Biological Process: cellular response to oxidative stress (GO:0034599);; Biological Process: hydrogen peroxide c…	K00434|6.8e-161|zju:107404477|K00434 L-ascorbate peroxidase [EC:1.11.1.11] | (RefSeq) L-ascorbate peroxidase 3-like	--	--	Peroxidase	L-ascorbate peroxidase 3 OS=Arabidopsis thaliana OX=3702 GN=APX3 PE=1 SV=1	L-ascorbate peroxidase OS=Theobroma cacao OX=3641 GN=TCM_006637 PE=3 SV=1	E	Amino acid transport and metabolism	L-ascorbate peroxidase 3-like [Ziziphus jujuba]
BMK_Unigene_155544	--	--	Molecular Function: microtubule motor activity (GO:0003777);; Molecular Function: ATP binding (GO:0005524);; Biological Process: microtubule-based movement (GO:0007018);; Molecular Function: microtubule binding (GO:0008017);;	K11498|0.0e+00|zju:107426786|K11498 centromeric protein E | (RefSeq) kinesin-like protein KIN-7D, mitochondrial	[Z]	Cytoskeleton	Kinesin motor domain;; Microtubule binding;; Zinc finger, C3HC4 type (RING finger)	Kinesin-like protein KIN-7D, mitochondrial OS=Arabidopsis thaliana OX=3702 GN=KIN7D PE=2 SV=1	Kinesin-like protein OS=Trema orientale OX=63057 GN=TorRG33x02_042920 PE=3 SV=1	Z	Cytoskeleton	kinesin-like protein KIN-7D, mitochondrial [Ziziphus jujuba]
BMK_Unigene_143616	--	--	Cellular Component: nucleus (GO:0005634);; Molecular Function: histone-lysine N-methyltransferase activity (GO:0018024);; Molecular Function: metal ion binding (GO:0046872);;	K09188|1.1e-16|cme:CYME_CMD005C|K09188 [histone H3]-lysine4 N-trimethyltransferase MLL3 [EC:2.1.1.354] | (RefSeq) similar to Trithorax protein	[BK]	--	SET domain;; SET domain	Histone-lysine N-methyltransferase ATX5 OS=Arabidopsis thaliana OX=3702 GN=ATX5 PE=2 SV=1	Putative histone-lysine N-methyltransferase transcription regulator PHD family OS=Rosa chinensis OX=74649 GN=RchiOBHm_Chr1g0380901 PE=4 SV=1	--	--	histone-lysine N-methyltransferase ATX4 [Ziziphus jujuba]
BMK_Unigene_177678	[F]	Nucleotide transport and metabolism	Molecular Function: ribonucleoside-diphosphate reductase activity, thioredoxin disulfide as acceptor (GO:0004748);; Molecular Function: ATP binding (GO:0005524);; Biological Process: DNA replication (GO:0006260);;	K10807|1.0e-48|lja:Lj1g3v1222710.1|K10807 ribonucleoside-diphosphate reductase subunit M1 [EC:1.17.4.1] | (RefSeq) Lj1g3v1222710.1; -	[F]	Nucleotide transport and metabolism	Ribonucleotide reductase, barrel domain	Ribonucleoside-diphosphate reductase large subunit OS=Arabidopsis thaliana OX=3702 GN=RNR1 PE=1 SV=1	Ribonucleoside-diphosphate reductase OS=Fragilariopsis cylindrus CCMP1102 OX=635003 GN=FRACYDRAFT_260490 PE=3 SV=1	F	Nucleotide transport and metabolism	ribonucleotide reductase M1 subunit [Basidiobolus meristosporus CBS 931.73]
BMK_Unigene_080520	--	--	Molecular Function: ATP binding (GO:0005524);; Biological Process: intracellular protein transport (GO:0006886);; Molecular Function: transferase activity (GO:0016740);;	K13141|8.0e-94|csat:104745793|K13141 integrator complex subunit 4 | (RefSeq) protein SIEL-like	[U]	Intracellular trafficking, secretion, and vesicular transport	VHS domain;; GAT domain	TOM1-like protein 9 OS=Arabidopsis thaliana OX=3702 GN=TOL9 PE=1 SV=1	Protein PEROXIN-4 OS=Morus notabilis OX=981085 GN=L484_007261 PE=3 SV=1	O	Posttranslational modification, protein turnover, chaperones	TOM1-like protein 9 isoform X1 [Ziziphus jujuba]
BMK_Unigene_153960	[T]	Signal transduction mechanisms	Molecular Function: voltage-gated potassium channel activity (GO:0005249);; Cellular Component: integral component of membrane (GO:0016021);; Biological Process: regulation of ion transmembrane transport (GO:0034765);;	K21867|3.9e-295|zju:107415201|K21867 potassium channel | (RefSeq) potassium channel AKT2/3 isoform X1	[PT]	--	Ion transport protein;; Ion channel;; Cyclic nucleotide-binding domain;; KHA, dimerisation domain of potassium ion channel;; Ankyrin repeats (3 copies);; Ankyrin repeats (many copies);; Ankyrin repeats (many copies);; Ankyrin repeat;; Ankyrin repeat	Potassium channel AKT2/3 OS=Arabidopsis thaliana OX=3702 GN=AKT2 PE=1 SV=1	Uncharacterized protein OS=Vitis vinifera OX=29760 GN=VIT_12s0034g02240 PE=3 SV=1	--	--	potassium channel AKT2/3 isoform X2 [Ziziphus jujuba]
[truncated: 28,776 more rows]
