# Supplementary material
Source: MDPI journal article supplement (https://www.mdpi.com/1999-4907/15/4/618)
Supplement: s1 [file s1 › Supplementary Table S3.xlsx]

## Sheet: Sheet1
Supplementary Table S3:Unigenes were categorized into 31 GO terms
BMK_Unigene_000005	GO:0000003	GO:0000902	GO:0000904	GO:0003006	GO:0005575	GO:0005622	GO:0005623	GO:0005737	GO:0008150	GO:0009653	GO:0009826	GO:0009856	GO:0009860	GO:0009932	GO:0009987	GO:0016043	GO:0016049	GO:0022414	GO:0030154	GO:0032501	GO:0032502	GO:0032989	GO:0040007	GO:0044424	GO:0044464	GO:0044706	GO:0048468	GO:0048588	GO:0048589	GO:0048856	GO:0048868	GO:0048869	GO:0051704	GO:0060560	GO:0071840
BMK_Unigene_000007	GO:0004672	GO:0005524
BMK_Unigene_000008	GO:0005575	GO:0005622	GO:0005623	GO:0005634	GO:0005654	GO:0016592	GO:0031974	GO:0031981	GO:0032991	GO:0043226	GO:0043227	GO:0043229	GO:0043231	GO:0043233	GO:0044422	GO:0044424	GO:0044428	GO:0044446	GO:0044451	GO:0044464	GO:0070013
BMK_Unigene_000013	GO:0003779
BMK_Unigene_000018	GO:0015267	GO:0016021
BMK_Unigene_000034	GO:0003674	GO:0005488	GO:0005515	GO:0005575	GO:0005622	GO:0005623	GO:0005634	GO:0005856	GO:0005874	GO:0008017	GO:0008092	GO:0015630	GO:0015631	GO:0043226	GO:0043227	GO:0043228	GO:0043229	GO:0043231	GO:0043232	GO:0044422	GO:0044424	GO:0044430	GO:0044446	GO:0044464	GO:0099080	GO:0099081	GO:0099512	GO:0099513
BMK_Unigene_000052	GO:0003676
BMK_Unigene_000059	GO:0005739
BMK_Unigene_000062	GO:0003677	GO:0003899	GO:0005665	GO:0005666	GO:0005736	GO:0006360	GO:0006366	GO:0008270	GO:0042797
BMK_Unigene_000074	GO:0009882
BMK_Unigene_000078	GO:0003677	GO:0004190
BMK_Unigene_000081	GO:0000003	GO:0003006	GO:0006935	GO:0007154	GO:0007275	GO:0008150	GO:0009553	GO:0009605	GO:0009856	GO:0009875	GO:0009987	GO:0010183	GO:0022414	GO:0032501	GO:0032502	GO:0040011	GO:0042221	GO:0042330	GO:0044706	GO:0048229	GO:0048856	GO:0048868	GO:0050896	GO:0050918	GO:0051704
BMK_Unigene_000088	GO:0016021
BMK_Unigene_000091	GO:0016021	GO:0022857	GO:0055085
BMK_Unigene_000096	GO:0030599	GO:0042545	GO:0045330	GO:0045490
BMK_Unigene_000097	GO:0003723
BMK_Unigene_000103	GO:0002230	GO:0002682	GO:0002697	GO:0002831	GO:0002833	GO:0003674	GO:0003824	GO:0005575	GO:0005622	GO:0005623	GO:0005634	GO:0005737	GO:0006629	GO:0007568	GO:0008150	GO:0016787	GO:0016788	GO:0031347	GO:0031349	GO:0032101	GO:0032103	GO:0032502	GO:0043226	GO:0043227	GO:0043229	GO:0043231	GO:0043900	GO:0043902	GO:0044424	GO:0044464	GO:0048518	GO:0048583	GO:0048584	GO:0048831	GO:0050688	GO:0050691	GO:0050789	GO:0050793	GO:0051094	GO:0051239	GO:0051240	GO:0052689	GO:0065007	GO:0080134	GO:1900055	GO:1900057	GO:1900424	GO:1900426	GO:1902288
BMK_Unigene_000107	GO:0005794	GO:0006486	GO:0016021	GO:0016757	GO:0030246
BMK_Unigene_000108	GO:0016021
BMK_Unigene_000109	GO:0003674	GO:0005215	GO:0005575	GO:0005623	GO:0005886	GO:0006810	GO:0006811	GO:0006812	GO:0008150	GO:0008324	GO:0009522	GO:0015075	GO:0015095	GO:0015318	GO:0015693	GO:0015979	GO:0016020	GO:0016021	GO:0022857	GO:0022890	GO:0030001	GO:0034220	GO:0044464	GO:0046873	GO:0051179	GO:0051234	GO:0055085	GO:0070838	GO:0071944	GO:0072511	GO:0098655	GO:0098660	GO:0098662	GO:1903830
BMK_Unigene_000116	GO:0003677	GO:0046872
BMK_Unigene_000132	GO:0004672	GO:0005524	GO:0016021
BMK_Unigene_000137	GO:0005739	GO:0032780	GO:0042030
BMK_Unigene_000148	GO:0016021
BMK_Unigene_000152	GO:0003723	GO:0046872
BMK_Unigene_000159	GO:0008168	GO:0032259
BMK_Unigene_000161	GO:0003676	GO:0015074
BMK_Unigene_000167	GO:0000139	GO:0016021	GO:0045489	GO:0047262	GO:0071555
BMK_Unigene_000171	GO:0004672	GO:0005524	GO:0016021
BMK_Unigene_000175	GO:0003674	GO:0003824	GO:0004842	GO:0006464	GO:0006807	GO:0008150	GO:0008152	GO:0009987	GO:0016567	GO:0016740	GO:0019538	GO:0019787	GO:0032446	GO:0036211	GO:0043170	GO:0043412	GO:0044237	GO:0044238	GO:0044260	GO:0044267	GO:0070647	GO:0071704	GO:0140096	GO:1901564
BMK_Unigene_000183	GO:0004519	GO:0005524	GO:0006298	GO:0016887	GO:0030983	GO:0045910
BMK_Unigene_000211	GO:0003676	GO:0004386	GO:0005524
BMK_Unigene_000224	GO:0000250	GO:0005811	GO:0016104	GO:0042300
BMK_Unigene_000231	GO:0016021
BMK_Unigene_000244	GO:0004674	GO:0005524	GO:0016021
BMK_Unigene_000263	GO:0005783	GO:0006888	GO:0006890	GO:0016021	GO:0030134
BMK_Unigene_000269	GO:0005515
BMK_Unigene_000272	GO:0000902	GO:0001101	GO:0003674	GO:0003824	GO:0004672	GO:0004674	GO:0005509	GO:0005524	GO:0005575	GO:0005618	GO:0005622	GO:0005623	GO:0005737	GO:0005773	GO:0005886	GO:0005975	GO:0006464	GO:0006468	GO:0006793	GO:0006796	GO:0006807	GO:0006884	GO:0006950	GO:0006952	GO:0007154	GO:0007165	GO:0007166	GO:0008150	GO:0008152	GO:0008361	GO:0009311	GO:0009505	GO:0009605	GO:0009607	GO:0009615	GO:0009620	GO:0009653	GO:0009719	GO:0009725	GO:0009751	GO:0009826	GO:0009987	GO:0009992	GO:0010033	GO:0014070	GO:0016020	GO:0016021	GO:0016043	GO:0016049
BMK_Unigene_000278	GO:0006869	GO:0008289
BMK_Unigene_000279	GO:0003677	GO:0005634	GO:0008289
BMK_Unigene_000281	GO:0001732	GO:0002191	GO:0003743	GO:0005852	GO:0016282	GO:0033290	GO:0098808
BMK_Unigene_000296	GO:0016021
BMK_Unigene_000298	GO:0000398	GO:0008270	GO:0045131
BMK_Unigene_000301	GO:0005575	GO:0005576	GO:0008150	GO:0009893	GO:0009894	GO:0009896	GO:0010506	GO:0010508	GO:0019222	GO:0031323	GO:0031325	GO:0031329	GO:0031331	GO:0048518	GO:0048522	GO:0050789	GO:0050794	GO:0065007
BMK_Unigene_000302	GO:0016021
BMK_Unigene_000304	GO:0008168	GO:0032259
BMK_Unigene_000322	GO:0004869
BMK_Unigene_000326	GO:0004497	GO:0005506	GO:0016705	GO:0020037
BMK_Unigene_000330	GO:0003677	GO:0005634	GO:0006260	GO:0006275	GO:0030337
BMK_Unigene_000331	GO:0005737	GO:0005874	GO:0007021	GO:0007023	GO:0048487
BMK_Unigene_000334	GO:0000166	GO:0003674	GO:0003676	GO:0003677	GO:0005488	GO:0005575	GO:0005622	GO:0005623	GO:0005634	GO:0008327	GO:0036094	GO:0042025	GO:0043226	GO:0043227	GO:0043229	GO:0043231	GO:0043565	GO:0044424	GO:0044464	GO:0097159	GO:1901265	GO:1901363
BMK_Unigene_000346	GO:0003674	GO:0003824	GO:0005575	GO:0005622	GO:0005623	GO:0008194	GO:0016740	GO:0016757	GO:0016758	GO:0035251	GO:0043226	GO:0043227	GO:0043229	GO:0043231	GO:0044424	GO:0044464	GO:0046527	GO:0050004	GO:0080043	GO:0080044
BMK_Unigene_000347	GO:0016021
BMK_Unigene_000350	GO:0008270
BMK_Unigene_000357	GO:0017183
BMK_Unigene_000362	GO:0000978	GO:0003700	GO:0005634	GO:0034605	GO:0042025	GO:0043565	GO:0043618	GO:0061408
BMK_Unigene_000378	GO:0005886	GO:0010167	GO:0015706	GO:0016021	GO:0042128
BMK_Unigene_000381	GO:0003677	GO:0005634	GO:0006355	GO:0009734
BMK_Unigene_000384	GO:0003674	GO:0003824	GO:0004478	GO:0005575	GO:0005622	GO:0005623	GO:0005737	GO:0005829	GO:0006556	GO:0016740	GO:0016765	GO:0044424	GO:0044444	GO:0044464	GO:0045454
BMK_Unigene_000389	GO:0005736
BMK_Unigene_000392	GO:0009507	GO:0009509	GO:0016117	GO:0016719	GO:0052886	GO:0052887
BMK_Unigene_000393	GO:0008270	GO:0016021
BMK_Unigene_000395	GO:0004721
BMK_Unigene_000402	GO:0005515	GO:0007165
BMK_Unigene_000404	GO:0003682	GO:0003735	GO:0005634	GO:0005761	GO:0006412
BMK_Unigene_000418	GO:0003723	GO:0006397
BMK_Unigene_000429	GO:0003677	GO:0005634	GO:0008289
BMK_Unigene_000433	GO:0016021
BMK_Unigene_000446	GO:0005524	GO:0005778	GO:0005829	GO:0007031	GO:0016558	GO:0016887
BMK_Unigene_000450	GO:0003978	GO:0006012
BMK_Unigene_000462	GO:0004674	GO:0005524	GO:0016021
BMK_Unigene_000480	GO:0004672	GO:0005524	GO:0016021	GO:0030246
BMK_Unigene_000501	GO:0003676	GO:0004386	GO:0005524
BMK_Unigene_000503	GO:0019825	GO:0020037
BMK_Unigene_000507	GO:0003677	GO:0005634	GO:0006355	GO:0009734
BMK_Unigene_000519	GO:0046983
BMK_Unigene_000526	GO:0003674	GO:0003824	GO:0004842	GO:0005575	GO:0005623	GO:0005886	GO:0006464	GO:0006508	GO:0006511	GO:0006807	GO:0006950	GO:0008150	GO:0008152	GO:0009056	GO:0009057	GO:0009266	GO:0009409	GO:0009628	GO:0009909	GO:0009987	GO:0010033	GO:0010200	GO:0010243	GO:0010498	GO:0010966	GO:0016020	GO:0016567	GO:0016740	GO:0019538	GO:0019787	GO:0019941	GO:0030163	GO:0032446	GO:0032879	GO:0033554	GO:0036211	GO:0042221	GO:0042493	GO:0043161	GO:0043170	GO:0043269	GO:0043412	GO:0043632	GO:0044070	GO:0044237	GO:0044238	GO:0044248	GO:0044257	GO:0044260
BMK_Unigene_000545	GO:0005737	GO:0008237	GO:0008239	GO:0046872
BMK_Unigene_000557	GO:0004185	GO:0006508
BMK_Unigene_000569	GO:0003676	GO:0031047
BMK_Unigene_000584	GO:0006511	GO:0031625
BMK_Unigene_000586	GO:0000276	GO:0015078	GO:0015986
BMK_Unigene_000590	GO:0000077	GO:0000723	GO:0004674	GO:0005524	GO:0005634	GO:0006281	GO:0006974	GO:0010212	GO:0016572	GO:1904262
BMK_Unigene_000593	GO:0003674	GO:0003676	GO:0003677	GO:0003723	GO:0003824	GO:0004518	GO:0004519	GO:0005488	GO:0005575	GO:0005622	GO:0005623	GO:0005737	GO:0006139	GO:0006725	GO:0006807	GO:0007154	GO:0007165	GO:0008150	GO:0008152	GO:0009451	GO:0009507	GO:0009536	GO:0009987	GO:0010019	GO:0016070	GO:0016787	GO:0016788	GO:0023052	GO:0031930	GO:0034641	GO:0043170	GO:0043226	GO:0043227	GO:0043229	GO:0043231	GO:0043412	GO:0044237	GO:0044238	GO:0044424	GO:0044444	GO:0044464	GO:0046483	GO:0050789	GO:0050794	GO:0050896	GO:0051716	GO:0065007	GO:0071704	GO:0090304
BMK_Unigene_000596	GO:0003676	GO:0015074
BMK_Unigene_000602	GO:0009523	GO:0009534	GO:0015979	GO:0016021	GO:0030145	GO:0045454
BMK_Unigene_000612	GO:0006397
BMK_Unigene_000622	GO:0005575	GO:0005623	GO:0005886	GO:0005911	GO:0009506	GO:0016020	GO:0030054	GO:0031224	GO:0031225	GO:0031226	GO:0044425	GO:0044459	GO:0044464	GO:0046658	GO:0055044	GO:0071944
BMK_Unigene_000634	GO:0042025
BMK_Unigene_000635	GO:0003677	GO:0003899	GO:0006351
BMK_Unigene_000639	GO:0015267	GO:0016021
BMK_Unigene_000643	GO:0003723	GO:0006397	GO:0008033	GO:0008380	GO:0009507
BMK_Unigene_000656	GO:0005524
BMK_Unigene_000657	GO:0003676
BMK_Unigene_000660	GO:0005515
BMK_Unigene_000664	GO:0008168	GO:0032259
BMK_Unigene_000665	GO:0006306	GO:0008168
BMK_Unigene_000672	GO:0000502
BMK_Unigene_000674	GO:0005575	GO:0005622	GO:0005623	GO:0005634	GO:0006403	GO:0006405	GO:0006406	GO:0006611	GO:0006810	GO:0006886	GO:0006913	GO:0008104	GO:0008150	GO:0008152	GO:0010467	GO:0015031	GO:0015833	GO:0015931	GO:0016973	GO:0031503	GO:0033036	GO:0034613	GO:0042886	GO:0043170	GO:0043226	GO:0043227	GO:0043229	GO:0043231	GO:0044424	GO:0044464	GO:0045184	GO:0046907	GO:0050657	GO:0050658	GO:0051028	GO:0051168	GO:0051169	GO:0051179	GO:0051234	GO:0051236	GO:0051641	GO:0051649	GO:0070727	GO:0071166	GO:0071426	GO:0071427	GO:0071702	GO:0071704	GO:0071705
BMK_Unigene_000676	GO:0002376	GO:0003674	GO:0005488	GO:0005515	GO:0005575	GO:0005622	GO:0005623	GO:0005737	GO:0005829	GO:0005886	GO:0006914	GO:0006950	GO:0006952	GO:0006955	GO:0006996	GO:0007033	GO:0008150	GO:0008152	GO:0009056	GO:0009987	GO:0016020	GO:0016043	GO:0016236	GO:0019899	GO:0019900	GO:0019901	GO:0043424	GO:0044237	GO:0044248	GO:0044424	GO:0044444	GO:0044464	GO:0045087	GO:0050896	GO:0061919	GO:0071840	GO:0071944	GO:1905037
BMK_Unigene_000678	GO:0004675	GO:0005524	GO:0005886	GO:0006468	GO:0016021
BMK_Unigene_000679	GO:0000287	GO:0005975	GO:0016868
BMK_Unigene_000692	GO:0008641
BMK_Unigene_000694	GO:0015297	GO:0016021	GO:0042910
BMK_Unigene_000703	GO:0003677	GO:0005634	GO:0016021	GO:0042025	GO:0046872
BMK_Unigene_000735	GO:0004674	GO:0005524	GO:0007165
BMK_Unigene_000740	GO:0004601	GO:0005576	GO:0006979	GO:0020037	GO:0042744	GO:0046872
BMK_Unigene_000748	GO:0004575	GO:0005987	GO:0033926
BMK_Unigene_000749	GO:0016021
BMK_Unigene_000765	GO:0005576	GO:0005618	GO:0009664	GO:0016020
BMK_Unigene_000768	GO:0008168
BMK_Unigene_000776	GO:0003677	GO:0005634	GO:0006355
BMK_Unigene_000794	GO:0015031
BMK_Unigene_000802	GO:0016021	GO:0019706
BMK_Unigene_000805	GO:0000175
BMK_Unigene_000808	GO:0005575	GO:0005622	GO:0005623	GO:0005737	GO:0005829	GO:0006950	GO:0006970	GO:0008150	GO:0009628	GO:0009651	GO:0044424	GO:0044444	GO:0044464	GO:0050896
BMK_Unigene_000810	GO:0003735	GO:0005840	GO:0006412
BMK_Unigene_000814	GO:0000911
BMK_Unigene_000815	GO:0005524
BMK_Unigene_000819	GO:0001101	GO:0005515	GO:0005575	GO:0005622	GO:0005623	GO:0005634	GO:0005737	GO:0005829	GO:0005856	GO:0005875	GO:0005886	GO:0008150	GO:0009507	GO:0009526	GO:0009536	GO:0009719	GO:0009725	GO:0009737	GO:0009941	GO:0010033	GO:0015630	GO:0016020	GO:0031967	GO:0031975	GO:0032991	GO:0033993	GO:0042221	GO:0043226	GO:0043227	GO:0043228	GO:0043229	GO:0043231	GO:0043232	GO:0044422	GO:0044424	GO:0044430	GO:0044434	GO:0044435	GO:0044444	GO:0044446	GO:0044464	GO:0050896	GO:0071944	GO:0097305	GO:1901700
BMK_Unigene_000827	GO:0016021
BMK_Unigene_000841	GO:0000226	GO:0000278	GO:0000902	GO:0003674	GO:0005488	GO:0005515	GO:0005575	GO:0005622	GO:0005623	GO:0005737	GO:0005819	GO:0005856	GO:0005874	GO:0005876	GO:0005886	GO:0005911	GO:0005938	GO:0006996	GO:0007010	GO:0007017	GO:0007020	GO:0007026	GO:0007049	GO:0008017	GO:0008092	GO:0008150	GO:0009506	GO:0009524	GO:0009653	GO:0009826	GO:0009987	GO:0010639	GO:0015630	GO:0015631	GO:0016020	GO:0016043	GO:0016049	GO:0022607	GO:0030054	GO:0030865	GO:0031023	GO:0031109	GO:0031110	GO:0031111	GO:0031114	GO:0031122	GO:0031647	GO:0032502	GO:0032886
BMK_Unigene_000842	GO:0000139	GO:0006486	GO:0016021	GO:0016757
BMK_Unigene_000843	GO:0005484	GO:0006890	GO:0016021
BMK_Unigene_000848	GO:0004842
BMK_Unigene_000850	GO:0016021	GO:0017022
BMK_Unigene_000857	GO:0004672	GO:0005524
BMK_Unigene_000868	GO:0003674	GO:0003824	GO:0006081	GO:0006082	GO:0006089	GO:0008150	GO:0008152	GO:0009056	GO:0009058	GO:0009438	GO:0009987	GO:0016053	GO:0016829	GO:0016835	GO:0016836	GO:0019172	GO:0019249	GO:0019752	GO:0032787	GO:0042180	GO:0042182	GO:0043436	GO:0044237	GO:0044248	GO:0044249	GO:0044281	GO:0044282	GO:0044283	GO:0046185	GO:0046394	GO:0051596	GO:0061727	GO:0071704	GO:0072330	GO:1901575	GO:1901576	GO:1901615	GO:1901617
BMK_Unigene_000885	GO:0003674	GO:0003824	GO:0004842	GO:0006464	GO:0006508	GO:0006511	GO:0006807	GO:0008150	GO:0008152	GO:0009056	GO:0009057	GO:0009987	GO:0016567	GO:0016740	GO:0019538	GO:0019787	GO:0019941	GO:0030163	GO:0032446	GO:0036211	GO:0043170	GO:0043412	GO:0043632	GO:0044237	GO:0044238	GO:0044248	GO:0044257	GO:0044260	GO:0044265	GO:0044267	GO:0051603	GO:0070647	GO:0071704	GO:0140096	GO:1901564	GO:1901565	GO:1901575
BMK_Unigene_000887	GO:0005802	GO:0005887	GO:0030148	GO:0030173	GO:0030176	GO:0033188	GO:0045140	GO:0046513	GO:0047493
BMK_Unigene_000895	GO:0005575	GO:0005618	GO:0005623	GO:0008150	GO:0009664	GO:0009987	GO:0016043	GO:0030312	GO:0044464	GO:0045229	GO:0071554	GO:0071555	GO:0071669	GO:0071840	GO:0071944
BMK_Unigene_000898	GO:0005874	GO:0008017
BMK_Unigene_000899	GO:0016021
BMK_Unigene_000900	GO:0016757
BMK_Unigene_000917	GO:0004672	GO:0005524	GO:0007229
BMK_Unigene_000920	GO:0004842
BMK_Unigene_000925	GO:0004252
BMK_Unigene_000926	GO:0015031
BMK_Unigene_000928	GO:0003993	GO:0046872
BMK_Unigene_000930	GO:0005524	GO:0005739	GO:0007005
BMK_Unigene_000944	GO:0003723	GO:0008270
BMK_Unigene_000945	GO:0006952	GO:0043531
BMK_Unigene_000962	GO:0016021	GO:0016192
BMK_Unigene_000965	GO:0000151	GO:0006511	GO:0034450
BMK_Unigene_000985	GO:0003723
BMK_Unigene_000994	GO:0004722	GO:0005634	GO:0009742	GO:0046872
BMK_Unigene_001002	GO:0005819	GO:0005874	GO:0032147	GO:0060236
BMK_Unigene_001005	GO:0005515
BMK_Unigene_001011	GO:0003723	GO:0003824	GO:0004425	GO:0005515	GO:0005575	GO:0005622	GO:0005623	GO:0005737	GO:0006568	GO:0009507	GO:0009536	GO:0016021	GO:0043226	GO:0043227	GO:0043229	GO:0043231	GO:0044424	GO:0044444	GO:0044464
BMK_Unigene_001015	GO:0003674	GO:0003676	GO:0003824	GO:0004842	GO:0005488	GO:0005515	GO:0005575	GO:0005622	GO:0005623	GO:0005737	GO:0005829	GO:0006464	GO:0006807	GO:0008150	GO:0008152	GO:0009987	GO:0016567	GO:0016740	GO:0019538	GO:0019787	GO:0019899	GO:0031625	GO:0032446	GO:0036211	GO:0043170	GO:0043412	GO:0044237	GO:0044238	GO:0044260	GO:0044267	GO:0044389	GO:0044424	GO:0044444	GO:0044464	GO:0061630	GO:0061659	GO:0070647	GO:0071704	GO:0140096	GO:1901564
BMK_Unigene_001017	GO:0016765	GO:0019408	GO:1904423
BMK_Unigene_001023	GO:0005789	GO:0016021
BMK_Unigene_001026	GO:0005515	GO:0005575	GO:0005622	GO:0005623	GO:0005737	GO:0005739	GO:0006605	GO:0006626	GO:0006810	GO:0006839	GO:0006886	GO:0006996	GO:0007005	GO:0008104	GO:0008150	GO:0009987	GO:0015031	GO:0015833	GO:0016043	GO:0033036	GO:0033365	GO:0034613	GO:0042886	GO:0043226	GO:0043227	GO:0043229	GO:0043231	GO:0044424	GO:0044444	GO:0044464	GO:0045184	GO:0046907	GO:0051179	GO:0051234	GO:0051641	GO:0051649	GO:0070585	GO:0070727	GO:0071702	GO:0071705	GO:0071840	GO:0072594	GO:0072655
BMK_Unigene_001028	GO:0016491
BMK_Unigene_001029	GO:0003723	GO:0005737
BMK_Unigene_001030	GO:0003723
BMK_Unigene_001036	GO:0016787
BMK_Unigene_001040	GO:0003690	GO:0004672	GO:0005524	GO:0006355	GO:0016021
BMK_Unigene_001041	GO:0003690	GO:0006355
BMK_Unigene_001042	GO:0004672	GO:0005524	GO:0016021
BMK_Unigene_001053	GO:0016747
BMK_Unigene_001057	GO:0003723
BMK_Unigene_001058	GO:0005886
BMK_Unigene_001068	GO:0008270
BMK_Unigene_001070	GO:0005509
BMK_Unigene_001079	GO:0003676	GO:0004553	GO:0005975	GO:0015074
BMK_Unigene_001080	GO:0005524	GO:0008763	GO:0009058	GO:0010274	GO:0016874
BMK_Unigene_001094	GO:0005509
BMK_Unigene_001104	GO:0000390	GO:0003676	GO:0071008
BMK_Unigene_001107	GO:0003824
BMK_Unigene_001113	GO:0005515	GO:0005575	GO:0005622	GO:0005623	GO:0005634	GO:0005737	GO:0005829	GO:0008150	GO:0009787	GO:0009788	GO:0009966	GO:0009968	GO:0010646	GO:0010648	GO:0023051	GO:0023057	GO:0043226	GO:0043227	GO:0043229	GO:0043231	GO:0044424	GO:0044444	GO:0044464	GO:0048519	GO:0048523	GO:0048583	GO:0048585	GO:0050789	GO:0050794	GO:0065007	GO:1901419	GO:1901420	GO:1905957	GO:1905958
BMK_Unigene_001136	GO:0004672	GO:0005524	GO:0016021
BMK_Unigene_001140	GO:0000003	GO:0000280	GO:0001655	GO:0001775	GO:0001822	GO:0002020	GO:0002253	GO:0002376	GO:0002429	GO:0002474	GO:0002682	GO:0002684	GO:0002757	GO:0002764	GO:0002768	GO:0003674	GO:0005102	GO:0005488	GO:0005515	GO:0005575	GO:0005576	GO:0005615	GO:0005622	GO:0005623	GO:0005634	GO:0005654	GO:0005737	GO:0005829	GO:0006464	GO:0006473	GO:0006475	GO:0006508	GO:0006511	GO:0006515	GO:0006807	GO:0006915	GO:0006950	GO:0006974	GO:0006996	GO:0007029	GO:0007049	GO:0007059	GO:0007127	GO:0007129	GO:0007130	GO:0007154	GO:0007165	GO:0007166	GO:0007275
BMK_Unigene_001145	GO:0003755	GO:0030154	GO:0042761	GO:0099402
BMK_Unigene_001147	GO:0016620
BMK_Unigene_001148	GO:0005575	GO:0005623	GO:0005886	GO:0016020	GO:0016758	GO:0044464	GO:0071944
BMK_Unigene_001149	GO:0003735	GO:0005840	GO:0006412	GO:0046872
BMK_Unigene_001159	GO:0003777	GO:0005524	GO:0005874	GO:0007018	GO:0008017
BMK_Unigene_001190	GO:0032955	GO:0051301
BMK_Unigene_001202	GO:0046983
BMK_Unigene_001204	GO:0045735
BMK_Unigene_001205	GO:0016021
BMK_Unigene_001207	GO:0003723	GO:0003735	GO:0006412	GO:0015934
BMK_Unigene_001212	GO:0000003	GO:0003006	GO:0003674	GO:0003824	GO:0004842	GO:0005575	GO:0005622	GO:0005623	GO:0005634	GO:0006464	GO:0006807	GO:0007154	GO:0007165	GO:0007275	GO:0007602	GO:0008150	GO:0008152	GO:0009314	GO:0009416	GO:0009581	GO:0009582	GO:0009583	GO:0009585	GO:0009605	GO:0009628	GO:0009639	GO:0009648	GO:0009791	GO:0009987	GO:0010017	GO:0010099	GO:0010228	GO:0016567	GO:0016740	GO:0019538	GO:0019787	GO:0022414	GO:0023052	GO:0032446	GO:0032501	GO:0032502	GO:0036211	GO:0043170	GO:0043226	GO:0043227	GO:0043229	GO:0043231	GO:0043412	GO:0044237
BMK_Unigene_001213	GO:0000160	GO:0005634	GO:0048579
BMK_Unigene_001216	GO:0016021
BMK_Unigene_001218	GO:0005506	GO:0008610	GO:0016021	GO:0016491
BMK_Unigene_001221	GO:0006869	GO:0008289
BMK_Unigene_001237	GO:0003677	GO:0003700	GO:0005634
BMK_Unigene_001248	GO:0003674	GO:0005096	GO:0005488	GO:0005515	GO:0005575	GO:0005622	GO:0005623	GO:0005737	GO:0005829	GO:0006810	GO:0006886	GO:0008047	GO:0008104	GO:0008150	GO:0012505	GO:0015031	GO:0015833	GO:0016020	GO:0017016	GO:0017137	GO:0019899	GO:0030234	GO:0030695	GO:0031267	GO:0031338	GO:0032879	GO:0033036	GO:0033043	GO:0034613	GO:0042886	GO:0043085	GO:0043087	GO:0043547	GO:0044093	GO:0044424	GO:0044444	GO:0044464	GO:0045184	GO:0046907	GO:0050789	GO:0050790	GO:0050794	GO:0051020	GO:0051049	GO:0051128	GO:0051179	GO:0051234	GO:0051336	GO:0051345
BMK_Unigene_001256	GO:0016021
BMK_Unigene_001258	GO:0008270
BMK_Unigene_001263	GO:0005507	GO:0046274	GO:0048046	GO:0052716
BMK_Unigene_001268	GO:0003677	GO:0005634	GO:0008289
BMK_Unigene_001270	GO:0016021
BMK_Unigene_001271	GO:0005575	GO:0005622	GO:0005623	GO:0005634	GO:0005737	GO:0009507	GO:0009536	GO:0043226	GO:0043227	GO:0043229	GO:0043231	GO:0044424	GO:0044444	GO:0044464
BMK_Unigene_001281	GO:0004672	GO:0005524
BMK_Unigene_001286	GO:0002237	GO:0003674	GO:0003824	GO:0004672	GO:0004674	GO:0005524	GO:0005575	GO:0005623	GO:0005886	GO:0006464	GO:0006468	GO:0006793	GO:0006796	GO:0006807	GO:0006950	GO:0008150	GO:0008152	GO:0009266	GO:0009409	GO:0009605	GO:0009607	GO:0009617	GO:0009625	GO:0009628	GO:0009987	GO:0010033	GO:0016020	GO:0016301	GO:0016310	GO:0016740	GO:0016772	GO:0016773	GO:0019538	GO:0032386	GO:0032388	GO:0032879	GO:0032880	GO:0033157	GO:0033158	GO:0033160	GO:0036211	GO:0042221	GO:0042306	GO:0042307	GO:0043170	GO:0043207	GO:0043412	GO:0044237	GO:0044238
BMK_Unigene_001288	GO:0003674	GO:0005096	GO:0005488	GO:0005515	GO:0005575	GO:0005622	GO:0005623	GO:0006810	GO:0006886	GO:0008047	GO:0008104	GO:0008150	GO:0012505	GO:0015031	GO:0015833	GO:0017016	GO:0017137	GO:0019899	GO:0030234	GO:0030695	GO:0031267	GO:0031338	GO:0032879	GO:0033036	GO:0033043	GO:0034613	GO:0042886	GO:0043085	GO:0043087	GO:0043547	GO:0044093	GO:0044464	GO:0045184	GO:0046907	GO:0050789	GO:0050790	GO:0050794	GO:0051020	GO:0051049	GO:0051128	GO:0051179	GO:0051234	GO:0051336	GO:0051345	GO:0051641	GO:0051649	GO:0060589	GO:0060627	GO:0065007
BMK_Unigene_001289	GO:0005096	GO:0046872
BMK_Unigene_001290	GO:0003677	GO:0003899	GO:0006351
BMK_Unigene_001291	GO:0016702	GO:0031408	GO:0046872
BMK_Unigene_001298	GO:0003735	GO:0005840	GO:0006412
BMK_Unigene_001300	GO:0004497	GO:0005506	GO:0016021	GO:0016705	GO:0020037
BMK_Unigene_001306	GO:0005874	GO:0008017
BMK_Unigene_001308	GO:0003723	GO:0031124
BMK_Unigene_001314	GO:0005737	GO:0008672	GO:0016832
BMK_Unigene_001321	GO:0007165	GO:0043531
BMK_Unigene_001334	GO:0000302	GO:0003674	GO:0005488	GO:0005515	GO:0005575	GO:0005622	GO:0005623	GO:0005737	GO:0005829	GO:0006457	GO:0006950	GO:0006970	GO:0006972	GO:0006979	GO:0008150	GO:0009266	GO:0009314	GO:0009408	GO:0009416	GO:0009628	GO:0009636	GO:0009642	GO:0009644	GO:0009987	GO:0010035	GO:0042221	GO:0042493	GO:0042542	GO:0044424	GO:0044444	GO:0044464	GO:0046677	GO:0050896	GO:0051082	GO:1901700
BMK_Unigene_001345	GO:0004347	GO:0005829	GO:0006094	GO:0006096	GO:0009817	GO:0046686
BMK_Unigene_001363	GO:0003680	GO:0003700	GO:0005634
BMK_Unigene_001367	GO:0016021	GO:0031982
BMK_Unigene_001370	GO:0006302	GO:0007095	GO:0030870
BMK_Unigene_001376	GO:0016021
BMK_Unigene_001387	GO:0003674	GO:0003676	GO:0003723	GO:0003824	GO:0004518	GO:0004519	GO:0005488	GO:0005575	GO:0005622	GO:0005623	GO:0005737	GO:0006139	GO:0006725	GO:0006807	GO:0008150	GO:0008152	GO:0009451	GO:0009507	GO:0009536	GO:0009987	GO:0016070	GO:0016787	GO:0016788	GO:0034641	GO:0043170	GO:0043226	GO:0043227	GO:0043229	GO:0043231	GO:0043412	GO:0044237	GO:0044238	GO:0044424	GO:0044444	GO:0044464	GO:0046483	GO:0071704	GO:0090304	GO:0090305	GO:0097159	GO:1901360	GO:1901363
BMK_Unigene_001388	GO:0003677	GO:0003723
BMK_Unigene_001403	GO:0008270	GO:0016491
BMK_Unigene_001407	GO:0016021
BMK_Unigene_001411	GO:0000159	GO:0005634	GO:0005829	GO:0006470	GO:0007165	GO:0031952	GO:0072542
BMK_Unigene_001430	GO:0004672	GO:0005524	GO:0016021
BMK_Unigene_001435	GO:0005347	GO:0016021
BMK_Unigene_001442	GO:0042025
BMK_Unigene_001448	GO:0003674	GO:0003676	GO:0003723	GO:0003824	GO:0004518	GO:0004519	GO:0005488	GO:0005575	GO:0005622	GO:0005623	GO:0006139	GO:0006396	GO:0006725	GO:0006807	GO:0008150	GO:0008152	GO:0008380	GO:0009451	GO:0009987	GO:0010467	GO:0016070	GO:0016787	GO:0016788	GO:0034641	GO:0043170	GO:0043226	GO:0043227	GO:0043229	GO:0043231	GO:0043412	GO:0044237	GO:0044238	GO:0044424	GO:0044464	GO:0046483	GO:0071704	GO:0090304	GO:0090305	GO:0097159	GO:1901360	GO:1901363
BMK_Unigene_001452	GO:0016021
BMK_Unigene_001467	GO:0005198	GO:0006886	GO:0008271	GO:0016021	GO:0016192	GO:0030117
BMK_Unigene_001468	GO:0016021
BMK_Unigene_001486	GO:0004252
BMK_Unigene_001489	GO:0004222	GO:0005524	GO:0016021
BMK_Unigene_001504	GO:0005985	GO:0016157
BMK_Unigene_001515	GO:0003735	GO:0005840	GO:0006412
BMK_Unigene_001528	GO:0004842	GO:0030014
BMK_Unigene_001542	GO:0003674	GO:0003824	GO:0016787	GO:0016810	GO:0016811
BMK_Unigene_001559	GO:0004222	GO:0046872
BMK_Unigene_001560	GO:0008194
BMK_Unigene_001565	GO:0016021
BMK_Unigene_001575	GO:0000103	GO:0004781
BMK_Unigene_001584	GO:0004722
BMK_Unigene_001592	GO:0004722	GO:0005634	GO:0009742	GO:0046872
BMK_Unigene_001595	GO:0005774	GO:0006886	GO:0016192	GO:0030897	GO:0031902	GO:0033263
BMK_Unigene_001603	GO:0003674	GO:0003676	GO:0003723	GO:0003824	GO:0004518	GO:0004519	GO:0005488	GO:0005575	GO:0005622	GO:0005623	GO:0006139	GO:0006725	GO:0006807	GO:0008150	GO:0008152	GO:0009451	GO:0009987	GO:0016070	GO:0016787	GO:0016788	GO:0034641	GO:0043170	GO:0043226	GO:0043227	GO:0043229	GO:0043231	GO:0043412	GO:0044237	GO:0044238	GO:0044424	GO:0044464	GO:0046483	GO:0071704	GO:0090304	GO:0090305	GO:0097159	GO:1901360	GO:1901363
BMK_Unigene_001605	GO:0008080	GO:0046872
BMK_Unigene_001607	GO:0016021	GO:0022857
BMK_Unigene_001612	GO:0005524	GO:0006457	GO:0051082
BMK_Unigene_001618	GO:0016021
BMK_Unigene_001626	GO:0016021	GO:0016740
BMK_Unigene_001627	GO:0003735	GO:0005840	GO:0006412
BMK_Unigene_001655	GO:0016791
BMK_Unigene_001662	GO:0005985	GO:0016157	GO:0046524
BMK_Unigene_001680	GO:0008299	GO:0016740
BMK_Unigene_001701	GO:0005575	GO:0005622	GO:0005623	GO:0005737	GO:0006810	GO:0006897	GO:0006898	GO:0006996	GO:0007010	GO:0007015	GO:0008150	GO:0009314	GO:0009416	GO:0009628	GO:0009637	GO:0009657	GO:0009658	GO:0009902	GO:0009903	GO:0009904	GO:0009987	GO:0016043	GO:0016192	GO:0019750	GO:0030029	GO:0030036	GO:0031982	GO:0043226	GO:0043227	GO:0044424	GO:0044464	GO:0050896	GO:0051179	GO:0051234	GO:0051640	GO:0051641	GO:0051644	GO:0051649	GO:0051656	GO:0051667	GO:0051716	GO:0071214	GO:0071478	GO:0071482	GO:0071483	GO:0071840	GO:0097435	GO:0098657	GO:0104004
BMK_Unigene_001717	GO:0005886	GO:0016021	GO:0016760	GO:0030244	GO:0046872	GO:0071555
BMK_Unigene_001726	GO:0006397
BMK_Unigene_001730	GO:0005634	GO:0006355	GO:0008270
BMK_Unigene_001733	GO:0005315	GO:0006817	GO:0016021
BMK_Unigene_001745	GO:0008194
BMK_Unigene_001750	GO:0000003	GO:0000322	GO:0000323	GO:0000325	GO:0000326	GO:0000327	GO:0003006	GO:0003674	GO:0003756	GO:0003824	GO:0005575	GO:0005618	GO:0005622	GO:0005623	GO:0005737	GO:0005773	GO:0005774	GO:0005783	GO:0005788	GO:0005794	GO:0005886	GO:0006457	GO:0006950	GO:0006970	GO:0007275	GO:0008150	GO:0009314	GO:0009416	GO:0009505	GO:0009507	GO:0009532	GO:0009536	GO:0009570	GO:0009579	GO:0009628	GO:0009642	GO:0009644	GO:0009651	GO:0009719	GO:0009725	GO:0009735	GO:0009790	GO:0009791	GO:0009793	GO:0009888	GO:0009892	GO:0009960	GO:0009987	GO:0010033
BMK_Unigene_001755	GO:0000049	GO:0004813	GO:0005524	GO:0005739	GO:0008270	GO:0070143
BMK_Unigene_001765	GO:0016021	GO:0022857
BMK_Unigene_001782	GO:0003677	GO:0005634
BMK_Unigene_001794	GO:0016021
BMK_Unigene_001798	GO:0003700	GO:0005634
BMK_Unigene_001817	GO:0008270	GO:0016874
BMK_Unigene_001818	GO:0006857	GO:0016021	GO:0022857
BMK_Unigene_001843	GO:0016021	GO:0022857
BMK_Unigene_001846	GO:0005634
BMK_Unigene_001850	GO:0005524	GO:0009116	GO:0016301
BMK_Unigene_001864	GO:0004519	GO:0005524	GO:0006298	GO:0016887	GO:0030983	GO:0045910
BMK_Unigene_001868	GO:0003677	GO:0046983
BMK_Unigene_001871	GO:0003674	GO:0003824	GO:0004842	GO:0005515	GO:0006464	GO:0006807	GO:0007275	GO:0008150	GO:0008152	GO:0009987	GO:0016567	GO:0016740	GO:0019538	GO:0019787	GO:0032446	GO:0032501	GO:0032502	GO:0036211	GO:0043170	GO:0043412	GO:0044237	GO:0044238	GO:0044260	GO:0044267	GO:0048731	GO:0048856	GO:0070647	GO:0071704	GO:0099402	GO:0140096	GO:1901564
BMK_Unigene_001877	GO:0000045	GO:0003674	GO:0005488	GO:0005515	GO:0005575	GO:0005622	GO:0005623	GO:0005634	GO:0005737	GO:0005829	GO:0006508	GO:0006511	GO:0006807	GO:0006914	GO:0006996	GO:0006997	GO:0006998	GO:0007030	GO:0007033	GO:0008150	GO:0008152	GO:0009056	GO:0009057	GO:0009987	GO:0010256	GO:0010498	GO:0010921	GO:0016043	GO:0016236	GO:0019208	GO:0019220	GO:0019222	GO:0019538	GO:0019888	GO:0019899	GO:0019941	GO:0022607	GO:0030163	GO:0030234	GO:0031323	GO:0031399	GO:0031468	GO:0032182	GO:0032268	GO:0035303	GO:0035304	GO:0043130	GO:0043161	GO:0043170
BMK_Unigene_001888	GO:0003735	GO:0005840	GO:0006412
BMK_Unigene_001899	GO:0046983
BMK_Unigene_001900	GO:0005524	GO:0005737	GO:0006457	GO:0051082
BMK_Unigene_001920	GO:0008356
BMK_Unigene_001932	GO:0003674	GO:0003676	GO:0003723	GO:0003824	GO:0004518	GO:0004519	GO:0005488	GO:0005575	GO:0005622	GO:0005623	GO:0006139	GO:0006725	GO:0006807	GO:0008150	GO:0008152	GO:0009451	GO:0009987	GO:0016070	GO:0016787	GO:0016788	GO:0034641	GO:0043170	GO:0043226	GO:0043227	GO:0043229	GO:0043231	GO:0043412	GO:0044237	GO:0044238	GO:0044424	GO:0044464	GO:0046483	GO:0071704	GO:0090304	GO:0090305	GO:0097159	GO:1901360	GO:1901363
BMK_Unigene_001944	GO:0003723	GO:0003724	GO:0005524	GO:0006401
BMK_Unigene_001960	GO:0003684	GO:0005654	GO:0005829	GO:0006289	GO:0031593	GO:0042025	GO:0043130	GO:0043161
BMK_Unigene_001963	GO:0003674	GO:0003756	GO:0003824	GO:0005575	GO:0005622	GO:0005623	GO:0005737	GO:0005739	GO:0005773	GO:0005774	GO:0005783	GO:0006457	GO:0006950	GO:0006979	GO:0008150	GO:0009507	GO:0009536	GO:0009987	GO:0012505	GO:0016020	GO:0016853	GO:0016860	GO:0016864	GO:0031090	GO:0033554	GO:0034976	GO:0043226	GO:0043227	GO:0043229	GO:0043231	GO:0044422	GO:0044424	GO:0044437	GO:0044444	GO:0044446	GO:0044464	GO:0045454	GO:0050896	GO:0051716	GO:0098588	GO:0098805	GO:0140096
BMK_Unigene_001971	GO:0008270	GO:0016491
BMK_Unigene_001980	GO:0003677	GO:0003700	GO:0005634
BMK_Unigene_001984	GO:0003723	GO:0004386	GO:0005524	GO:0005634
BMK_Unigene_002000	GO:0002376	GO:0003674	GO:0005488	GO:0005539	GO:0005575	GO:0005623	GO:0005886	GO:0006955	GO:0008150	GO:0016020	GO:0031224	GO:0031225	GO:0031226	GO:0042834	GO:0044425	GO:0044459	GO:0044464	GO:0046658	GO:0050896	GO:0071944	GO:0097367
BMK_Unigene_002011	GO:0003676	GO:0004386	GO:0005524
BMK_Unigene_002027	GO:0003774	GO:0016459
BMK_Unigene_002029	GO:0003723
BMK_Unigene_002034	GO:0006672	GO:0016021	GO:0016811
BMK_Unigene_002046	GO:0006511	GO:0019005	GO:0031146
BMK_Unigene_002062	GO:0003674	GO:0003824	GO:0004842	GO:0006464	GO:0006508	GO:0006511	GO:0006807	GO:0008150	GO:0008152	GO:0009056	GO:0009057	GO:0009987	GO:0010498	GO:0016021	GO:0016567	GO:0016740	GO:0019538	GO:0019787	GO:0019941	GO:0030163	GO:0030247	GO:0032446	GO:0036211	GO:0043161	GO:0043170	GO:0043412	GO:0043632	GO:0044237	GO:0044238	GO:0044248	GO:0044257	GO:0044260	GO:0044265	GO:0044267	GO:0051603	GO:0061630	GO:0061659	GO:0070647	GO:0071704	GO:0140096	GO:1901564	GO:1901565	GO:1901575
BMK_Unigene_002067	GO:0003676
BMK_Unigene_002088	GO:0005634	GO:0009414	GO:0009651	GO:0009738	GO:0010029	GO:0010228
BMK_Unigene_002092	GO:0003723
BMK_Unigene_002095	GO:0046983
BMK_Unigene_002111	GO:0004729	GO:0006782
BMK_Unigene_002115	GO:0000398	GO:0003723	GO:0005681	GO:0008270
BMK_Unigene_002131	GO:0004553	GO:0005975
BMK_Unigene_002133	GO:0004672	GO:0005524	GO:0016021
BMK_Unigene_002158	GO:0003723
BMK_Unigene_002194	GO:0009263	GO:0016491
BMK_Unigene_002197	GO:0000272	GO:0016161	GO:0102229
BMK_Unigene_002200	GO:0004672	GO:0005524
BMK_Unigene_002212	GO:0000785	GO:0000976	GO:0005634	GO:0006355	GO:0008168	GO:0031490	GO:0032259	GO:0032454	GO:0033169
BMK_Unigene_002220	GO:0016021	GO:0022857
BMK_Unigene_002227	GO:0016787
BMK_Unigene_002233	GO:0005575	GO:0005618	GO:0005623	GO:0006950	GO:0006970	GO:0008150	GO:0009505	GO:0009628	GO:0009651	GO:0030312	GO:0044464	GO:0050896	GO:0071944
BMK_Unigene_002234	GO:0000226	GO:0001578	GO:0001889	GO:0001947	GO:0002009	GO:0003002	GO:0003007	GO:0003143	GO:0003341	GO:0003352	GO:0003356	GO:0003674	GO:0005488	GO:0005515	GO:0005575	GO:0005622	GO:0005623	GO:0005634	GO:0005654	GO:0005737	GO:0005829	GO:0005856	GO:0005886	GO:0005929	GO:0005930	GO:0006928	GO:0006996	GO:0007010	GO:0007017	GO:0007018	GO:0007275	GO:0007368	GO:0007389	GO:0007507	GO:0008150	GO:0009653	GO:0009790	GO:0009799	GO:0009855	GO:0009887	GO:0009888	GO:0009987	GO:0016020	GO:0016043	GO:0016604	GO:0016607	GO:0022607	GO:0030030	GO:0030031
BMK_Unigene_002240	GO:0010274
BMK_Unigene_002245	GO:0007165
BMK_Unigene_002263	GO:0003674	GO:0003824	GO:0004175	GO:0004190	GO:0005575	GO:0005622	GO:0005623	GO:0005737	GO:0005773	GO:0005829	GO:0005911	GO:0006508	GO:0006807	GO:0006950	GO:0006970	GO:0008150	GO:0008152	GO:0008233	GO:0009056	GO:0009057	GO:0009506	GO:0009628	GO:0009651	GO:0009719	GO:0009725	GO:0009735	GO:0010033	GO:0010035	GO:0010038	GO:0016787	GO:0019538	GO:0030054	GO:0030163	GO:0042221	GO:0043170	GO:0043226	GO:0043227	GO:0043229	GO:0043231	GO:0044238	GO:0044424	GO:0044444	GO:0044464	GO:0046686	GO:0050896	GO:0055044	GO:0070001	GO:0070011	GO:0071704
BMK_Unigene_002267	GO:0003777	GO:0005524	GO:0005874	GO:0007018	GO:0008017
BMK_Unigene_002282	GO:0000139	GO:0006506	GO:0016021
BMK_Unigene_002289	GO:0005634	GO:0005737	GO:0061015
BMK_Unigene_002299	GO:0003993	GO:0046872
BMK_Unigene_002303	GO:0004672	GO:0005524	GO:0016021
BMK_Unigene_002311	GO:0016021
BMK_Unigene_002312	GO:0005524	GO:0016021	GO:0016887	GO:0042626
BMK_Unigene_002315	GO:0003777	GO:0005524	GO:0007018	GO:0008017
BMK_Unigene_002319	GO:0016740
BMK_Unigene_002322	GO:0003924	GO:0005525	GO:0006412	GO:0009507	GO:0019904	GO:0045727
BMK_Unigene_002323	GO:0016491
BMK_Unigene_002326	GO:0016021	GO:0016740
BMK_Unigene_002330	GO:0016021	GO:0022857
BMK_Unigene_002331	GO:0016021	GO:0016740
BMK_Unigene_002335	GO:0001047	GO:0001067	GO:0001085	GO:0001091	GO:0001094	GO:0001098	GO:0001099	GO:0001672	GO:0003674	GO:0003676	GO:0003677	GO:0005488	GO:0005515	GO:0005575	GO:0005622	GO:0005623	GO:0005634	GO:0008134	GO:0008150	GO:0010639	GO:0010847	GO:0031445	GO:0031452	GO:0033043	GO:0033044	GO:0042393	GO:0043226	GO:0043227	GO:0043229	GO:0043231	GO:0044087	GO:0044212	GO:0044424	GO:0044464	GO:0045798	GO:0048519	GO:0048523	GO:0050789	GO:0050794	GO:0051128	GO:0051129	GO:0065007	GO:0070577	GO:0097159	GO:0140030	GO:0140033	GO:1901363	GO:1902275	GO:1905268
BMK_Unigene_002339	GO:0004846	GO:0005777	GO:0006144	GO:0019628
BMK_Unigene_002341	GO:0016491
BMK_Unigene_002360	GO:0006869	GO:0008289	GO:0016021
BMK_Unigene_002373	GO:0016740
BMK_Unigene_002374	GO:0005829	GO:0030904	GO:0042147
BMK_Unigene_002379	GO:0061630
BMK_Unigene_002382	GO:0009416	GO:0009522	GO:0009523	GO:0009535	GO:0009768	GO:0009941	GO:0010287	GO:0016021	GO:0016168	GO:0018298
BMK_Unigene_002383	GO:0016021
BMK_Unigene_002386	GO:0005634
BMK_Unigene_002389	GO:0003677	GO:0008168	GO:0016491	GO:0032259
BMK_Unigene_002391	GO:0016787
BMK_Unigene_002395	GO:0000268	GO:0003674	GO:0005048	GO:0005052	GO:0005488	GO:0005515	GO:0005575	GO:0005622	GO:0005623	GO:0005737	GO:0005777	GO:0005778	GO:0005829	GO:0006605	GO:0006625	GO:0006810	GO:0006886	GO:0006996	GO:0007031	GO:0008104	GO:0008150	GO:0009719	GO:0009725	GO:0009733	GO:0009987	GO:0010033	GO:0015031	GO:0015833	GO:0015919	GO:0016020	GO:0016043	GO:0016558	GO:0016560	GO:0017038	GO:0031090	GO:0031903	GO:0033036	GO:0033218	GO:0033365	GO:0034613	GO:0042221	GO:0042277	GO:0042579	GO:0042886	GO:0043226	GO:0043227	GO:0043229	GO:0043231	GO:0043574
BMK_Unigene_002398	GO:0003735	GO:0005762	GO:0032543
BMK_Unigene_002402	GO:0003735	GO:0005840	GO:0006412
BMK_Unigene_002409	GO:0003735	GO:0006412	GO:0015934
BMK_Unigene_002418	GO:0000151	GO:0003674	GO:0003824	GO:0004842	GO:0005515	GO:0005575	GO:0005622	GO:0005623	GO:0005634	GO:0006464	GO:0006508	GO:0006511	GO:0006807	GO:0006950	GO:0007275	GO:0008150	GO:0008152	GO:0009056	GO:0009057	GO:0009266	GO:0009408	GO:0009628	GO:0009653	GO:0009719	GO:0009725	GO:0009733	GO:0009791	GO:0009987	GO:0010015	GO:0010033	GO:0010101	GO:0010102	GO:0010286	GO:0010311	GO:0010498	GO:0016567	GO:0016740	GO:0019005	GO:0019538	GO:0019787	GO:0019941	GO:0022622	GO:0030163	GO:0031146	GO:0031461	GO:0032446	GO:0032501	GO:0032502	GO:0032870
BMK_Unigene_002424	GO:0043531
BMK_Unigene_002426	GO:0000139	GO:0006886	GO:0048280
BMK_Unigene_002428	GO:0000139	GO:0016021	GO:0045489	GO:0047262	GO:0071555
BMK_Unigene_002429	GO:0003777	GO:0005524	GO:0005871	GO:0005874	GO:0007018	GO:0008017	GO:0016887
BMK_Unigene_002430	GO:0005515	GO:0007275	GO:0007346	GO:0008150	GO:0009292	GO:0009294	GO:0009987	GO:0022622	GO:0032501	GO:0032502	GO:0044764	GO:0045787	GO:0045931	GO:0048364	GO:0048518	GO:0048522	GO:0048731	GO:0048856	GO:0050789	GO:0050794	GO:0051704	GO:0051726	GO:0065007	GO:0099402
BMK_Unigene_002438	GO:0004672	GO:0005524	GO:0016021
BMK_Unigene_002450	GO:0007094
BMK_Unigene_002454	GO:0003700	GO:0045893
BMK_Unigene_002459	GO:0000160	GO:0005634
BMK_Unigene_002464	GO:0004713	GO:0005524
BMK_Unigene_002476	GO:0000049	GO:0005634	GO:0005737	GO:0008536	GO:0071528
BMK_Unigene_002484	GO:0003924	GO:0005525	GO:0005789	GO:0016021
BMK_Unigene_002490	GO:0005789	GO:0016021	GO:0016740	GO:0018279
BMK_Unigene_002493	GO:0003674	GO:0005488	GO:0005515	GO:0008017	GO:0008092	GO:0008150	GO:0009719	GO:0009723	GO:0009725	GO:0009987	GO:0010033	GO:0015631	GO:0032870	GO:0042221	GO:0050896	GO:0051716	GO:0070887	GO:0071310	GO:0071369	GO:0071495
BMK_Unigene_002498	GO:0004553	GO:0005975
BMK_Unigene_002499	GO:0003735	GO:0005840	GO:0006412
BMK_Unigene_002507	GO:0006629	GO:0080019	GO:0102965
BMK_Unigene_002508	GO:0016021
BMK_Unigene_002520	GO:0003684	GO:0003872	GO:0005524	GO:0006096	GO:0006281	GO:0008094
BMK_Unigene_002531	GO:0030247
BMK_Unigene_002532	GO:0071949
BMK_Unigene_002541	GO:0003855	GO:0004764
BMK_Unigene_002544	GO:0000166	GO:0003674	GO:0003824	GO:0005488	GO:0005575	GO:0005576	GO:0006082	GO:0006629	GO:0006631	GO:0007154	GO:0007267	GO:0007275	GO:0008150	GO:0008152	GO:0009553	GO:0009987	GO:0010430	GO:0016614	GO:0016829	GO:0016830	GO:0016832	GO:0019395	GO:0019752	GO:0023052	GO:0030258	GO:0032501	GO:0032502	GO:0032787	GO:0034440	GO:0036094	GO:0043167	GO:0043168	GO:0043436	GO:0044237	GO:0044238	GO:0044255	GO:0044281	GO:0046593	GO:0048037	GO:0048229	GO:0048856	GO:0050660	GO:0050662	GO:0055114	GO:0071704	GO:0097159	GO:1901265	GO:1901363
BMK_Unigene_002545	GO:0005525
BMK_Unigene_002548	GO:0000932	GO:0003674	GO:0003676	GO:0003723	GO:0003729	GO:0003824	GO:0004518	GO:0005488	GO:0005575	GO:0005618	GO:0005622	GO:0005623	GO:0005634	GO:0005635	GO:0005737	GO:0005783	GO:0005829	GO:0005886	GO:0005911	GO:0006082	GO:0006139	GO:0006396	GO:0006397	GO:0006401	GO:0006402	GO:0006629	GO:0006720	GO:0006721	GO:0006725	GO:0006807	GO:0006950	GO:0006970	GO:0007275	GO:0008150	GO:0008152	GO:0008299	GO:0008610	GO:0009056	GO:0009057	GO:0009058	GO:0009266	GO:0009408	GO:0009506	GO:0009507	GO:0009536	GO:0009628	GO:0009651	GO:0009685	GO:0009686
BMK_Unigene_002576	GO:0004556	GO:0005509	GO:0005975	GO:0103025
BMK_Unigene_002594	GO:0016021
BMK_Unigene_002599	GO:0007034
BMK_Unigene_002615	GO:0016021
BMK_Unigene_002623	GO:0005515	GO:0005575	GO:0005623	GO:0005886	GO:0016020	GO:0044464	GO:0071944
BMK_Unigene_002625	GO:0003866	GO:0009073	GO:0009423
BMK_Unigene_002648	GO:0009506	GO:0016021
BMK_Unigene_002659	GO:0005524	GO:0005737	GO:0006457	GO:0051082
BMK_Unigene_002661	GO:0008168	GO:0016021	GO:0032259
BMK_Unigene_002675	GO:0003676	GO:0004333	GO:0004386	GO:0005524	GO:0006099	GO:0006106	GO:0045239
BMK_Unigene_002678	GO:0004674	GO:0005524
BMK_Unigene_002689	GO:0004672	GO:0005524	GO:0016021
BMK_Unigene_002700	GO:0004672	GO:0005524	GO:0016021
BMK_Unigene_002705	GO:0005634	GO:0006355	GO:0009734
BMK_Unigene_002708	GO:0004619	GO:0005737	GO:0006007	GO:0030145
BMK_Unigene_002715	GO:0000786	GO:0003677	GO:0005634	GO:0046982
BMK_Unigene_002721	GO:0000166	GO:0003824	GO:0005509	GO:0044237
BMK_Unigene_002726	GO:0006520	GO:0008483	GO:0009058	GO:0030170
BMK_Unigene_002734	GO:0016740	GO:0046983
BMK_Unigene_002765	GO:0004768	GO:0006636	GO:0016021
BMK_Unigene_002773	GO:0009055	GO:0009507	GO:0046872	GO:0051537
BMK_Unigene_002779	GO:0005524	GO:0016021	GO:0016887	GO:0042626
BMK_Unigene_002820	GO:0005524	GO:0009901	GO:0010584	GO:0016021	GO:0016787
BMK_Unigene_002833	GO:0042302
BMK_Unigene_002834	GO:0008233
BMK_Unigene_002846	GO:0005886	GO:0016021
BMK_Unigene_002855	GO:0003674	GO:0003824	GO:0004029	GO:0004030	GO:0006725	GO:0008150	GO:0008152	GO:0009058	GO:0009698	GO:0009699	GO:0009987	GO:0016491	GO:0016620	GO:0016903	GO:0019438	GO:0019748	GO:0044237	GO:0044249	GO:0044550	GO:0050269	GO:0055114	GO:0071704	GO:1901360	GO:1901362	GO:1901576
BMK_Unigene_002856	GO:0004869
BMK_Unigene_002857	GO:0001732	GO:0003743	GO:0005852	GO:0016282	GO:0033290
BMK_Unigene_002859	GO:0016021
BMK_Unigene_002873	GO:0003723
BMK_Unigene_002876	GO:0000398	GO:0003723
BMK_Unigene_002881	GO:0004531	GO:0006259
BMK_Unigene_002900	GO:0004252
BMK_Unigene_002916	GO:0005089	GO:0035023
BMK_Unigene_002917	GO:0003674	GO:0003824	GO:0004180	GO:0004181	GO:0005575	GO:0005576	GO:0005615	GO:0006508	GO:0006807	GO:0008150	GO:0008152	GO:0008233	GO:0008235	GO:0008237	GO:0008238	GO:0008270	GO:0016787	GO:0019538	GO:0043170	GO:0044238	GO:0044421	GO:0070011	GO:0071704	GO:0140096	GO:1901564
BMK_Unigene_002920	GO:0016021	GO:0022857
BMK_Unigene_002921	GO:0000155
BMK_Unigene_002923	GO:0004674	GO:0005524	GO:0016021
BMK_Unigene_002936	GO:0003677	GO:0005634	GO:0016021	GO:0042025	GO:0046872
BMK_Unigene_002941	GO:0016021
BMK_Unigene_002952	GO:0006486	GO:0016757
BMK_Unigene_002962	GO:0004348	GO:0006680	GO:0016020
BMK_Unigene_002976	GO:0003676	GO:0004386	GO:0005524
BMK_Unigene_002977	GO:0003723
BMK_Unigene_002984	GO:0003674	GO:0003676	GO:0003723	GO:0003824	GO:0004652	GO:0005488	GO:0005575	GO:0005622	GO:0005623	GO:0005737	GO:0005829	GO:0006139	GO:0006276	GO:0006378	GO:0006396	GO:0006397	GO:0006725	GO:0006807	GO:0008150	GO:0008152	GO:0009451	GO:0009987	GO:0010467	GO:0016070	GO:0016071	GO:0016740	GO:0016772	GO:0016779	GO:0031123	GO:0031124	GO:0034641	GO:0043170	GO:0043412	GO:0043631	GO:0044237	GO:0044238	GO:0044424	GO:0044444	GO:0044464	GO:0046483	GO:0070566	GO:0071704	GO:0090304	GO:0097159	GO:1901360	GO:1901363
BMK_Unigene_002987	GO:0015098	GO:0016021
BMK_Unigene_002990	GO:0000815	GO:0005771	GO:0006900	GO:0032511
BMK_Unigene_002991	GO:0005634	GO:0008420	GO:0070940
BMK_Unigene_002995	GO:0004672	GO:0005524	GO:0016021
BMK_Unigene_003001	GO:0003723	GO:0006396	GO:0016779
BMK_Unigene_003004	GO:0003924	GO:0005525
BMK_Unigene_003005	GO:0003735	GO:0005840	GO:0006412
BMK_Unigene_003021	GO:0003677	GO:0005634
BMK_Unigene_003024	GO:0005985	GO:0016157	GO:0046524
BMK_Unigene_003026	GO:0043531
BMK_Unigene_003028	GO:0005388	GO:0005524	GO:0005783	GO:0016021	GO:0046872
BMK_Unigene_003051	GO:0000786	GO:0003677	GO:0005634	GO:0046982
BMK_Unigene_003070	GO:0000049	GO:0002161	GO:0004822	GO:0005524	GO:0006428
BMK_Unigene_003074	GO:0005575	GO:0005623	GO:0005929	GO:0031514	GO:0042995	GO:0043226	GO:0044464	GO:0120025
BMK_Unigene_003085	GO:0004367	GO:0005975	GO:0009331	GO:0046168	GO:0051287
BMK_Unigene_003096	GO:0000027	GO:0003735	GO:0006412	GO:0022625
BMK_Unigene_003114	GO:0004553	GO:0005975	GO:0046658
BMK_Unigene_003117	GO:0003723	GO:1990904
BMK_Unigene_003166	GO:0003951	GO:0004143	GO:0005524	GO:0006952	GO:0007205
BMK_Unigene_003171	GO:0006952	GO:0043531
BMK_Unigene_003181	GO:0016021
BMK_Unigene_003200	GO:0006865	GO:0016021	GO:0055085
BMK_Unigene_003235	GO:0004672	GO:0005524
BMK_Unigene_003244	GO:0006952	GO:0043531
BMK_Unigene_003250	GO:0004675	GO:0005102	GO:0005524	GO:0016021
BMK_Unigene_003255	GO:0006397	GO:0008143	GO:0043488	GO:1900364
BMK_Unigene_003260	GO:0016791
BMK_Unigene_003261	GO:0004725	GO:0008138
BMK_Unigene_003268	GO:0003677	GO:0005634	GO:0006355
BMK_Unigene_003273	GO:0002949	GO:0004222	GO:0005739	GO:0046872	GO:0061711
BMK_Unigene_003274	GO:0005643	GO:0046907
BMK_Unigene_003275	GO:0004351	GO:0006536	GO:0030170
BMK_Unigene_003276	GO:0005783	GO:0005886	GO:0010155	GO:0016021
BMK_Unigene_003277	GO:0008643	GO:0016021	GO:0022857
BMK_Unigene_003278	GO:0005856	GO:0005885	GO:0030833	GO:0034314
BMK_Unigene_003279	GO:0051087
BMK_Unigene_003284	GO:0005886
BMK_Unigene_003286	GO:0006807	GO:0036361
BMK_Unigene_003319	GO:0008270	GO:0009451	GO:0043231
BMK_Unigene_003321	GO:0000079	GO:0019901
BMK_Unigene_003325	GO:0005634	GO:0006355	GO:0008270	GO:0009640
BMK_Unigene_003334	GO:0051513
BMK_Unigene_003346	GO:0003735	GO:0005840	GO:0006412
BMK_Unigene_003350	GO:0003860
BMK_Unigene_003368	GO:0004672	GO:0005524
BMK_Unigene_003371	GO:0008483
BMK_Unigene_003375	GO:0016021
BMK_Unigene_003380	GO:0003723	GO:0003724	GO:0005524	GO:0006401
BMK_Unigene_003384	GO:0043531
BMK_Unigene_003400	GO:0005516
BMK_Unigene_003405	GO:0006633	GO:0016021	GO:0016747
BMK_Unigene_003419	GO:0000723	GO:0006281	GO:0016887	GO:0030870	GO:0046872
BMK_Unigene_003421	GO:0001666	GO:0003674	GO:0003824	GO:0004672	GO:0004674	GO:0004712	GO:0005515	GO:0005575	GO:0005622	GO:0005623	GO:0005737	GO:0005783	GO:0005789	GO:0006082	GO:0006464	GO:0006468	GO:0006629	GO:0006720	GO:0006721	GO:0006793	GO:0006796	GO:0006807	GO:0006950	GO:0007154	GO:0007165	GO:0008150	GO:0008152	GO:0008299	GO:0008610	GO:0009058	GO:0009628	GO:0009685	GO:0009686	GO:0009719	GO:0009723	GO:0009725	GO:0009743	GO:0009744	GO:0009746	GO:0009750	GO:0009756	GO:0009966	GO:0009968	GO:0009987	GO:0010033	GO:0010035	GO:0010038	GO:0010039	GO:0010104
BMK_Unigene_003430	GO:0003677	GO:0003700	GO:0005634
BMK_Unigene_003433	GO:0016021
BMK_Unigene_003436	GO:0005975	GO:0030246	GO:0047938
BMK_Unigene_003440	GO:0005524	GO:0005737	GO:0006457	GO:0051082
BMK_Unigene_003457	GO:0005575	GO:0005623	GO:0005886	GO:0016020	GO:0044464	GO:0071944
BMK_Unigene_003464	GO:0004672	GO:0005524
BMK_Unigene_003466	GO:0005575	GO:0005622	GO:0005623	GO:0005634	GO:0005737	GO:0008150	GO:0009314	GO:0009416	GO:0009507	GO:0009532	GO:0009536	GO:0009570	GO:0009628	GO:0043226	GO:0043227	GO:0043229	GO:0043231	GO:0044422	GO:0044424	GO:0044434	GO:0044435	GO:0044444	GO:0044446	GO:0044464	GO:0050896
BMK_Unigene_003475	GO:0004777	GO:0005739	GO:0009013	GO:0009450
BMK_Unigene_003480	GO:0005524	GO:0033180	GO:0046034	GO:1902600
BMK_Unigene_003494	GO:0009507
BMK_Unigene_003495	GO:0016021
BMK_Unigene_003497	GO:0004497	GO:0005506	GO:0016021	GO:0016705	GO:0020037
BMK_Unigene_003503	GO:0008270
BMK_Unigene_003504	GO:0005737	GO:0006914
BMK_Unigene_003512	GO:0003735	GO:0005840	GO:0006412
BMK_Unigene_003513	GO:0003674	GO:0003676	GO:0003723	GO:0003746	GO:0005488	GO:0005575	GO:0005622	GO:0005623	GO:0005737	GO:0005739	GO:0005759	GO:0006412	GO:0006414	GO:0006518	GO:0006807	GO:0008135	GO:0008150	GO:0008152	GO:0009058	GO:0009059	GO:0009987	GO:0010467	GO:0019538	GO:0031974	GO:0032543	GO:0034641	GO:0034645	GO:0043043	GO:0043170	GO:0043226	GO:0043227	GO:0043229	GO:0043231	GO:0043233	GO:0043603	GO:0043604	GO:0044237	GO:0044238	GO:0044249	GO:0044260	GO:0044267	GO:0044271	GO:0044422	GO:0044424	GO:0044429	GO:0044444	GO:0044446	GO:0044464	GO:0070013
BMK_Unigene_003530	GO:0004668	GO:0009446	GO:0047632
BMK_Unigene_003531	GO:0005634	GO:0005694	GO:0008270	GO:0018024
BMK_Unigene_003537	GO:0004842	GO:0005634	GO:0005737	GO:0009611	GO:0009867	GO:0016874	GO:0042742
BMK_Unigene_003541	GO:0004674	GO:0005524	GO:0016021	GO:0048544
BMK_Unigene_003556	GO:0016787
BMK_Unigene_003572	GO:0004497	GO:0005506	GO:0010268	GO:0016021	GO:0016131	GO:0016705	GO:0020037
BMK_Unigene_003575	GO:0004674	GO:0005524	GO:0007165
BMK_Unigene_003577	GO:0005524	GO:0016021	GO:0016887
BMK_Unigene_003598	GO:0001067	GO:0001101	GO:0003674	GO:0003676	GO:0003677	GO:0003700	GO:0005488	GO:0005515	GO:0005575	GO:0005622	GO:0005623	GO:0005634	GO:0005975	GO:0005976	GO:0006355	GO:0006950	GO:0006952	GO:0008150	GO:0008152	GO:0009605	GO:0009607	GO:0009620	GO:0009719	GO:0009725	GO:0009733	GO:0009735	GO:0009737	GO:0009741	GO:0009888	GO:0009889	GO:0009891	GO:0009893	GO:0009987	GO:0010033	GO:0010087	GO:0010089	GO:0010383	GO:0010410	GO:0010468	GO:0010556	GO:0010557	GO:0010604	GO:0010628	GO:0014070	GO:0019219	GO:0019222	GO:0030154	GO:0031323	GO:0031325
BMK_Unigene_003602	GO:0005737	GO:0005975	GO:0030246	GO:0047938
BMK_Unigene_003607	GO:0003680	GO:0005634
BMK_Unigene_003608	GO:0004565	GO:0005975	GO:0030246
BMK_Unigene_003612	GO:0016021
BMK_Unigene_003622	GO:0003824	GO:0006284	GO:0051539
BMK_Unigene_003623	GO:0004347	GO:0006094	GO:0006096
BMK_Unigene_003637	GO:0005524	GO:0016021	GO:0016887	GO:0042626
BMK_Unigene_003690	GO:0007165	GO:0043531
BMK_Unigene_003709	GO:0008252
BMK_Unigene_003716	GO:0001731	GO:0003743
BMK_Unigene_003718	GO:0005575	GO:0005622	GO:0005623	GO:0005737	GO:0008150	GO:0009507	GO:0009536	GO:0009987	GO:0019725	GO:0042592	GO:0043226	GO:0043227	GO:0043229	GO:0043231	GO:0044424	GO:0044444	GO:0044464	GO:0045454	GO:0050789	GO:0050794	GO:0065007	GO:0065008
BMK_Unigene_003723	GO:0002181	GO:0003674	GO:0003676	GO:0003723	GO:0003735	GO:0005198	GO:0005488	GO:0005575	GO:0005622	GO:0005623	GO:0005737	GO:0005773	GO:0005774	GO:0005829	GO:0005840	GO:0005911	GO:0006412	GO:0006518	GO:0006807	GO:0008150	GO:0008152	GO:0009058	GO:0009059	GO:0009506	GO:0009987	GO:0010467	GO:0015934	GO:0016020	GO:0019538	GO:0022625	GO:0022626	GO:0030054	GO:0031090	GO:0032991	GO:0034641	GO:0034645	GO:0043043	GO:0043170	GO:0043226	GO:0043227	GO:0043228	GO:0043229	GO:0043231	GO:0043232	GO:0043603	GO:0043604	GO:0044237	GO:0044238	GO:0044249
BMK_Unigene_003746	GO:0000502	GO:0006417	GO:0019887	GO:0019901	GO:0033674	GO:0043022
BMK_Unigene_003754	GO:0005737	GO:0008180
BMK_Unigene_003756	GO:0003677	GO:0003700	GO:0005634
BMK_Unigene_003774	GO:0016021
BMK_Unigene_003776	GO:0003723	GO:0003735	GO:0006412	GO:0015935
BMK_Unigene_003777	GO:0000027	GO:0003723	GO:0003735	GO:0006412	GO:0022625	GO:1902626
BMK_Unigene_003784	GO:0005515	GO:0008150	GO:0008582	GO:0040008	GO:0044087	GO:0045886	GO:0045926	GO:0048519	GO:0048523	GO:0048638	GO:0048640	GO:0050789	GO:0050793	GO:0050794	GO:0050803	GO:0050807	GO:0051093	GO:0051128	GO:0051129	GO:0051239	GO:0051241	GO:0051960	GO:0051961	GO:0051963	GO:0051964	GO:0065007	GO:0065008	GO:1904396	GO:1904397	GO:1905809	GO:2000026
BMK_Unigene_003793	GO:0005509	GO:0016021	GO:0055085
BMK_Unigene_003802	GO:0016021
BMK_Unigene_003809	GO:0003677	GO:0005634	GO:0006355
BMK_Unigene_003818	GO:0000028	GO:0003735	GO:0006412	GO:0022627
BMK_Unigene_003830	GO:0016787
BMK_Unigene_003834	GO:0001101	GO:0003674	GO:0003676	GO:0003677	GO:0003700	GO:0005488	GO:0005575	GO:0005622	GO:0005623	GO:0005634	GO:0006355	GO:0006950	GO:0006970	GO:0006979	GO:0008150	GO:0008152	GO:0009266	GO:0009314	GO:0009409	GO:0009414	GO:0009415	GO:0009416	GO:0009611	GO:0009628	GO:0009642	GO:0009644	GO:0009651	GO:0009719	GO:0009725	GO:0009737	GO:0009889	GO:0009890	GO:0009892	GO:0009987	GO:0010033	GO:0010035	GO:0010117	GO:0010200	GO:0010243	GO:0010468	GO:0010556	GO:0010558	GO:0010605	GO:0010629	GO:0015979	GO:0019219	GO:0019222	GO:0031323	GO:0031324
BMK_Unigene_003861	GO:0005524
BMK_Unigene_003874	GO:0007275	GO:0008150	GO:0009653	GO:0009791	GO:0010015	GO:0010101	GO:0010102	GO:0010468	GO:0019222	GO:0022622	GO:0032501	GO:0032502	GO:0048364	GO:0048527	GO:0048528	GO:0048731	GO:0048856	GO:0050789	GO:0060255	GO:0065007	GO:0090696	GO:0090697	GO:0090698	GO:0099402	GO:1905392
BMK_Unigene_003880	GO:0000302	GO:0003674	GO:0005488	GO:0005515	GO:0005575	GO:0005622	GO:0005623	GO:0005737	GO:0006355	GO:0006950	GO:0006979	GO:0006996	GO:0008150	GO:0009266	GO:0009295	GO:0009314	GO:0009408	GO:0009416	GO:0009507	GO:0009532	GO:0009536	GO:0009570	GO:0009628	GO:0009636	GO:0009642	GO:0009644	GO:0009657	GO:0009658	GO:0009889	GO:0009987	GO:0010035	GO:0010468	GO:0010556	GO:0016043	GO:0019219	GO:0019222	GO:0031323	GO:0031326	GO:0032991	GO:0042221	GO:0042493	GO:0042542	GO:0042644	GO:0042646	GO:0043226	GO:0043227	GO:0043228	GO:0043229	GO:0043231
BMK_Unigene_003884	GO:0016020
BMK_Unigene_003895	GO:0003756	GO:0045454
BMK_Unigene_003902	GO:0003723
BMK_Unigene_003906	GO:0004842
BMK_Unigene_003924	GO:0005524	GO:0005886	GO:0016021	GO:0016887	GO:0042626	GO:0055085
BMK_Unigene_003925	GO:0016866	GO:0071669
BMK_Unigene_003928	GO:0016301	GO:0030247
BMK_Unigene_003938	GO:0005525
BMK_Unigene_003953	GO:0015276	GO:0016021
BMK_Unigene_003955	GO:0004672	GO:0005524	GO:0016021
BMK_Unigene_003982	GO:0046872
BMK_Unigene_003989	GO:0016491	GO:0046872
BMK_Unigene_003991	GO:0003860
BMK_Unigene_003996	GO:0006465	GO:0008233	GO:0016021
BMK_Unigene_004008	GO:0016021
BMK_Unigene_004022	GO:0016021
BMK_Unigene_004031	GO:0003968
BMK_Unigene_004044	GO:0016787	GO:0043531
BMK_Unigene_004047	GO:0004674	GO:0005524
BMK_Unigene_004051	GO:0035091
BMK_Unigene_004065	GO:0003674	GO:0005102	GO:0005488	GO:0005515	GO:0005575	GO:0005576	GO:0007154	GO:0007267	GO:0008150	GO:0009987	GO:0023052	GO:0030154	GO:0032502	GO:0033612	GO:0045165	GO:0045168	GO:0048046	GO:0048869
BMK_Unigene_004069	GO:0016021
BMK_Unigene_004085	GO:0003723	GO:0008168	GO:0032259
BMK_Unigene_004087	GO:0000139	GO:0000325	GO:0003924	GO:0005525	GO:0005575	GO:0005622	GO:0005623	GO:0005737	GO:0005773	GO:0005774	GO:0005794	GO:0005802	GO:0006810	GO:0006886	GO:0006904	GO:0008104	GO:0008150	GO:0009705	GO:0012505	GO:0015031	GO:0015833	GO:0016020	GO:0031090	GO:0031984	GO:0032588	GO:0033036	GO:0034613	GO:0042886	GO:0043226	GO:0043227	GO:0043229	GO:0043231	GO:0044422	GO:0044424	GO:0044431	GO:0044437	GO:0044444	GO:0044446	GO:0044464	GO:0045184	GO:0046907	GO:0051179	GO:0051234	GO:0051641	GO:0051649	GO:0070727	GO:0071702	GO:0071705	GO:0098588
BMK_Unigene_004098	GO:0016021
BMK_Unigene_004116	GO:0005886	GO:0016021	GO:0055085
BMK_Unigene_004119	GO:0005094	GO:0005737
BMK_Unigene_004121	GO:0005515	GO:0005575	GO:0005622	GO:0005623	GO:0005634	GO:0005654	GO:0016604	GO:0016607	GO:0031974	GO:0031981	GO:0043226	GO:0043227	GO:0043229	GO:0043231	GO:0043233	GO:0044422	GO:0044424	GO:0044428	GO:0044446	GO:0044451	GO:0044464	GO:0070013
BMK_Unigene_004126	GO:0032440
BMK_Unigene_004136	GO:0005525	GO:0016817
BMK_Unigene_004143	GO:0005634	GO:0009611	GO:0031347	GO:2000022
BMK_Unigene_004166	GO:0016021	GO:0022857
BMK_Unigene_004169	GO:0005575	GO:0005622	GO:0005623	GO:0005737	GO:0005829	GO:0005886	GO:0008150	GO:0009507	GO:0009526	GO:0009536	GO:0009941	GO:0010035	GO:0010038	GO:0016020	GO:0031967	GO:0031975	GO:0042221	GO:0043226	GO:0043227	GO:0043229	GO:0043231	GO:0044422	GO:0044424	GO:0044434	GO:0044435	GO:0044444	GO:0044446	GO:0044464	GO:0046686	GO:0050896	GO:0071944
BMK_Unigene_004171	GO:0005524	GO:0016307	GO:0046872
BMK_Unigene_004175	GO:0004725	GO:0008138	GO:0051015
BMK_Unigene_004185	GO:0016740
BMK_Unigene_004189	GO:0003677	GO:0003700	GO:0005634
BMK_Unigene_004201	GO:0016021
BMK_Unigene_004204	GO:0004672	GO:0005524	GO:0006468	GO:0007165
BMK_Unigene_004238	GO:0000003	GO:0000151	GO:0000375	GO:0000377	GO:0000398	GO:0000974	GO:0002218	GO:0002253	GO:0002376	GO:0002682	GO:0002684	GO:0003006	GO:0005515	GO:0005575	GO:0005622	GO:0005623	GO:0005634	GO:0005681	GO:0006139	GO:0006355	GO:0006396	GO:0006397	GO:0006508	GO:0006725	GO:0006807	GO:0006950	GO:0006952	GO:0007154	GO:0007165	GO:0007275	GO:0008150	GO:0008152	GO:0008380	GO:0009605	GO:0009607	GO:0009617	GO:0009620	GO:0009719	GO:0009725	GO:0009743	GO:0009746	GO:0009749	GO:0009755	GO:0009756	GO:0009790	GO:0009791	GO:0009793	GO:0009870	GO:0009889
BMK_Unigene_004252	GO:0003700	GO:0005634
BMK_Unigene_004276	GO:0046872
BMK_Unigene_004282	GO:0004445	GO:0046856	GO:0052658	GO:0052659
BMK_Unigene_004287	GO:0016021
BMK_Unigene_004293	GO:0003723	GO:1990904
BMK_Unigene_004294	GO:0004252	GO:0009916	GO:0016021	GO:0046872	GO:0070469	GO:0102721
BMK_Unigene_004295	GO:0005575	GO:0005622	GO:0005623	GO:0005737	GO:0006091	GO:0008150	GO:0008152	GO:0009507	GO:0009534	GO:0009535	GO:0009536	GO:0009579	GO:0009767	GO:0009773	GO:0009987	GO:0010598	GO:0015979	GO:0016020	GO:0019684	GO:0022900	GO:0031976	GO:0031984	GO:0032991	GO:0034357	GO:0042651	GO:0043226	GO:0043227	GO:0043229	GO:0043231	GO:0044237	GO:0044422	GO:0044424	GO:0044425	GO:0044434	GO:0044435	GO:0044436	GO:0044444	GO:0044446	GO:0044464	GO:0055035	GO:0055114	GO:0098796
BMK_Unigene_004297	GO:0005737	GO:0006888
BMK_Unigene_004305	GO:0016491	GO:0046872
BMK_Unigene_004311	GO:0016616	GO:0051287
BMK_Unigene_004313	GO:0003830	GO:0006487	GO:0016021
BMK_Unigene_004315	GO:0030173
BMK_Unigene_004316	GO:0006506	GO:0016021	GO:0017176
BMK_Unigene_004324	GO:0004497	GO:0005506	GO:0016021	GO:0016705	GO:0020037
BMK_Unigene_004326	GO:0005575	GO:0005622	GO:0005623	GO:0005737	GO:0005773	GO:0043226	GO:0043227	GO:0043229	GO:0043231	GO:0044424	GO:0044444	GO:0044464
BMK_Unigene_004329	GO:0000776	GO:0019237	GO:0051382
BMK_Unigene_004333	GO:0005575	GO:0005911	GO:0008150	GO:0008284	GO:0009506	GO:0030054	GO:0042127	GO:0048518	GO:0048522	GO:0050789	GO:0050794	GO:0055044	GO:0065007
BMK_Unigene_004337	GO:0006886	GO:0016192	GO:0030117
BMK_Unigene_004344	GO:0008194
BMK_Unigene_004345	GO:0004674	GO:0005524
BMK_Unigene_004346	GO:0003723	GO:0003735	GO:0005739	GO:0005840	GO:0006412
BMK_Unigene_004350	GO:0016614	GO:0050660
BMK_Unigene_004354	GO:0003676	GO:0004523	GO:0004842	GO:0016874	GO:0046872
BMK_Unigene_004369	GO:0003995	GO:0050660
BMK_Unigene_004379	GO:0003677	GO:0003700	GO:0005634
BMK_Unigene_004383	GO:0006952	GO:0043531
BMK_Unigene_004386	GO:0003755
BMK_Unigene_004390	GO:0097428
BMK_Unigene_004391	GO:0007165
BMK_Unigene_004395	GO:0046983
BMK_Unigene_004396	GO:0003735	GO:0005840	GO:0006412
BMK_Unigene_004398	GO:0005524	GO:0016021	GO:0016887	GO:0042626
BMK_Unigene_004403	GO:0000003	GO:0003006	GO:0005575	GO:0005576	GO:0005623	GO:0005886	GO:0007275	GO:0008150	GO:0009055	GO:0009791	GO:0009856	GO:0009908	GO:0016020	GO:0022414	GO:0031012	GO:0031224	GO:0031225	GO:0031226	GO:0032501	GO:0032502	GO:0044421	GO:0044425	GO:0044459	GO:0044464	GO:0044706	GO:0046658	GO:0048046	GO:0048367	GO:0048437	GO:0048438	GO:0048443	GO:0048466	GO:0048608	GO:0048653	GO:0048731	GO:0048827	GO:0048856	GO:0051704	GO:0061458	GO:0071944	GO:0090567	GO:0099402
BMK_Unigene_004407	GO:0004664	GO:0009094	GO:0009570	GO:0047769
BMK_Unigene_004475	GO:0003735	GO:0005840	GO:0006412
BMK_Unigene_004523	GO:0005739	GO:0008137
BMK_Unigene_004787	GO:0003723	GO:0005737
BMK_Unigene_004948	GO:0003674	GO:0003824	GO:0003954	GO:0005488	GO:0005575	GO:0005622	GO:0005623	GO:0005634	GO:0005737	GO:0005829	GO:0008150	GO:0008152	GO:0009628	GO:0016491	GO:0016651	GO:0043226	GO:0043227	GO:0043229	GO:0043231	GO:0044424	GO:0044444	GO:0044464	GO:0048037	GO:0050896	GO:0051536	GO:0051540	GO:0055114	GO:0070482
BMK_Unigene_005090	GO:0004707	GO:0005524
BMK_Unigene_005346	GO:0003723	GO:0003735	GO:0006412	GO:0015934
BMK_Unigene_005391	GO:0003735	GO:0005840	GO:0006412
BMK_Unigene_005419	GO:0003674	GO:0003824	GO:0004477	GO:0004488	GO:0005575	GO:0005622	GO:0005623	GO:0005737	GO:0005829	GO:0006082	GO:0006575	GO:0006725	GO:0006730	GO:0006732	GO:0006760	GO:0006807	GO:0008150	GO:0008152	GO:0009507	GO:0009536	GO:0009987	GO:0016491	GO:0016645	GO:0016646	GO:0016787	GO:0016810	GO:0016814	GO:0019219	GO:0019222	GO:0019238	GO:0019752	GO:0031323	GO:0034641	GO:0042558	GO:0043226	GO:0043227	GO:0043229	GO:0043231	GO:0043436	GO:0043603	GO:0044030	GO:0044237	GO:0044281	GO:0044424	GO:0044444	GO:0044464	GO:0046483	GO:0046653	GO:0050789
BMK_Unigene_005429	GO:0000145	GO:0006887	GO:0015031
BMK_Unigene_005447	GO:0003677
BMK_Unigene_005504	GO:0003677	GO:0005634	GO:0008270
BMK_Unigene_005548	GO:0004601	GO:0005576	GO:0006979	GO:0020037	GO:0042744	GO:0046872
BMK_Unigene_005554	GO:0005179	GO:0005576
BMK_Unigene_005585	GO:0005524	GO:0016740
BMK_Unigene_005619	GO:0004672	GO:0005524	GO:0006468
BMK_Unigene_005642	GO:0003676	GO:0004523
BMK_Unigene_005806	GO:0005524	GO:0016740
BMK_Unigene_005864	GO:0005515
BMK_Unigene_005892	GO:0003723	GO:0005634	GO:0006396	GO:1990904
BMK_Unigene_005955	GO:0005506	GO:0005759	GO:0016226	GO:0051537
BMK_Unigene_006064	GO:0004198
BMK_Unigene_006081	GO:0003723
BMK_Unigene_006097	GO:0000228	GO:0000785	GO:0000790	GO:0000819	GO:0003674	GO:0003682	GO:0005488	GO:0005575	GO:0005622	GO:0005623	GO:0005634	GO:0005694	GO:0005737	GO:0006139	GO:0006259	GO:0006260	GO:0006261	GO:0006281	GO:0006301	GO:0006725	GO:0006807	GO:0006950	GO:0006974	GO:0006996	GO:0007049	GO:0007059	GO:0007062	GO:0008150	GO:0008152	GO:0009058	GO:0009059	GO:0009507	GO:0009526	GO:0009536	GO:0009941	GO:0009987	GO:0016043	GO:0022402	GO:0031967	GO:0031974	GO:0031975	GO:0031981	GO:0032991	GO:0033554	GO:0034641	GO:0034645	GO:0042555	GO:0043170	GO:0043226
BMK_Unigene_006168	GO:0006508	GO:0008234
BMK_Unigene_006479	GO:0004198
BMK_Unigene_006617	GO:0004097
BMK_Unigene_006698	GO:0003743
BMK_Unigene_006769	GO:0003924	GO:0005525	GO:0005634	GO:0006913	GO:0015031
BMK_Unigene_006778	GO:0004672	GO:0005524	GO:0006468
BMK_Unigene_006793	GO:0004252	GO:0006508
BMK_Unigene_006807	GO:0003723	GO:0005730
BMK_Unigene_007005	GO:0004721	GO:0046872
BMK_Unigene_007094	GO:0000930	GO:0003924	GO:0005525	GO:0005874	GO:0007020	GO:0031122
BMK_Unigene_007212	GO:0004869
BMK_Unigene_007308	GO:0004478	GO:0005524	GO:0005829	GO:0006556	GO:0006730	GO:0046872
BMK_Unigene_007350	GO:0003774	GO:0005524	GO:0016459	GO:0051015
BMK_Unigene_007403	GO:0005576	GO:0030570
BMK_Unigene_007461	GO:0003677	GO:0003723
BMK_Unigene_007532	GO:0006511	GO:0016874
BMK_Unigene_007546	GO:0003924	GO:0005525
BMK_Unigene_007560	GO:0004190	GO:0016021
BMK_Unigene_007568	GO:0004478	GO:0005524	GO:0006556	GO:0006730	GO:0046872
BMK_Unigene_007638	GO:0005575	GO:0005622	GO:0005623	GO:0005737	GO:0005829	GO:0005874	GO:0007021	GO:0007023	GO:0044424	GO:0044444	GO:0044464	GO:0048487
BMK_Unigene_007694	GO:0004129
BMK_Unigene_007762	GO:0008234
BMK_Unigene_007768	GO:0004410	GO:0019878
BMK_Unigene_007815	GO:0006996	GO:0007005	GO:0007006	GO:0007007	GO:0008150	GO:0009987	GO:0016043	GO:0019867	GO:0042407	GO:0061024	GO:0071840
BMK_Unigene_007954	GO:0005524	GO:0016787
BMK_Unigene_007976	GO:0042302
BMK_Unigene_008113	GO:0000139	GO:0005575	GO:0005622	GO:0005623	GO:0005737	GO:0005783	GO:0005789	GO:0005794	GO:0006810	GO:0006886	GO:0008104	GO:0008150	GO:0012505	GO:0015031	GO:0015833	GO:0016020	GO:0016021	GO:0031090	GO:0031984	GO:0033036	GO:0034613	GO:0042175	GO:0042886	GO:0043226	GO:0043227	GO:0043229	GO:0043231	GO:0044422	GO:0044424	GO:0044425	GO:0044431	GO:0044432	GO:0044444	GO:0044446	GO:0044464	GO:0045184	GO:0046907	GO:0051179	GO:0051234	GO:0051641	GO:0051649	GO:0070727	GO:0071702	GO:0071705	GO:0098588	GO:0098791	GO:0098827
BMK_Unigene_008245	GO:0006508	GO:0008234
BMK_Unigene_008677	GO:0003735	GO:0005840	GO:0006412
BMK_Unigene_008742	GO:0003735	GO:0005840	GO:0006412
BMK_Unigene_008852	GO:0016021
BMK_Unigene_008968	GO:0005515
BMK_Unigene_009074	GO:0016491	GO:0055114	GO:0071949
BMK_Unigene_009418	GO:0003779
BMK_Unigene_009517	GO:0000003	GO:0000165	GO:0001101	GO:0003006	GO:0003674	GO:0003824	GO:0004672	GO:0004674	GO:0004707	GO:0005524	GO:0005575	GO:0005622	GO:0005623	GO:0005634	GO:0005737	GO:0006464	GO:0006468	GO:0006725	GO:0006790	GO:0006793	GO:0006796	GO:0006807	GO:0006935	GO:0006950	GO:0006970	GO:0006979	GO:0007154	GO:0007165	GO:0007275	GO:0008150	GO:0008152	GO:0009058	GO:0009266	GO:0009314	GO:0009403	GO:0009404	GO:0009409	GO:0009411	GO:0009416	GO:0009555	GO:0009605	GO:0009607	GO:0009611	GO:0009617	GO:0009628	GO:0009700	GO:0009719	GO:0009725	GO:0009737
BMK_Unigene_009665	GO:0005952	GO:0008603	GO:0030552
BMK_Unigene_009833	GO:0003735	GO:0005840	GO:0006412
BMK_Unigene_009869	GO:0003677
BMK_Unigene_010126	GO:0005634	GO:1902979
BMK_Unigene_010288	GO:0005840
BMK_Unigene_010368	GO:0005643	GO:0017056
BMK_Unigene_010471	GO:0005509
BMK_Unigene_010752	GO:0003677	GO:0005634
BMK_Unigene_010763	GO:0004499	GO:0050660	GO:0050661
BMK_Unigene_010880	GO:0003735	GO:0005840	GO:0006412
BMK_Unigene_011040	GO:0005975	GO:0016832
BMK_Unigene_011118	GO:0000323	GO:0005515	GO:0005575	GO:0005622	GO:0005623	GO:0005634	GO:0005635	GO:0005643	GO:0005730	GO:0005737	GO:0005764	GO:0005765	GO:0005773	GO:0005774	GO:0005829	GO:0006810	GO:0006888	GO:0008150	GO:0012505	GO:0016020	GO:0016192	GO:0031080	GO:0031090	GO:0031967	GO:0031974	GO:0031975	GO:0031981	GO:0032991	GO:0043226	GO:0043227	GO:0043228	GO:0043229	GO:0043231	GO:0043232	GO:0043233	GO:0044422	GO:0044424	GO:0044428	GO:0044437	GO:0044444	GO:0044446	GO:0044464	GO:0046907	GO:0048193	GO:0051179	GO:0051234	GO:0051641	GO:0051649	GO:0070013
BMK_Unigene_011337	GO:0006091	GO:0008218
BMK_Unigene_011376	GO:0003674	GO:0003824	GO:0004177	GO:0005575	GO:0005622	GO:0005623	GO:0005634	GO:0005737	GO:0005773	GO:0006508	GO:0006807	GO:0008150	GO:0008152	GO:0008233	GO:0008236	GO:0008238	GO:0009507	GO:0009536	GO:0009987	GO:0016043	GO:0016787	GO:0017171	GO:0019538	GO:0022607	GO:0043170	GO:0043226	GO:0043227	GO:0043229	GO:0043231	GO:0043933	GO:0044085	GO:0044238	GO:0044424	GO:0044444	GO:0044464	GO:0051259	GO:0051260	GO:0051262	GO:0051289	GO:0065003	GO:0070008	GO:0070009	GO:0070011	GO:0071704	GO:0071840	GO:0140096	GO:1901564
BMK_Unigene_011562	GO:0016021
BMK_Unigene_011609	GO:0016787
BMK_Unigene_011657	GO:0005515
BMK_Unigene_011727	GO:0004190
BMK_Unigene_012032	GO:0004857	GO:0016021	GO:0030599	GO:0042545	GO:0045330	GO:0045490
BMK_Unigene_012194	GO:0006508
BMK_Unigene_012448	GO:0006351	GO:0046872
BMK_Unigene_012544	GO:0005643	GO:0006913	GO:0017056
BMK_Unigene_012832	GO:0004672	GO:0005524
BMK_Unigene_013395	GO:0000027	GO:0000470	GO:0019843
BMK_Unigene_013489	GO:0005515
BMK_Unigene_013588	GO:0003674	GO:0005215	GO:0005575	GO:0005622	GO:0005623	GO:0005737	GO:0005768	GO:0005794	GO:0005802	GO:0005886	GO:0006810	GO:0006811	GO:0006812	GO:0006813	GO:0006814	GO:0006820	GO:0006821	GO:0008150	GO:0008324	GO:0008509	GO:0008511	GO:0009674	GO:0009987	GO:0012505	GO:0015075	GO:0015077	GO:0015079	GO:0015081	GO:0015103	GO:0015108	GO:0015291	GO:0015293	GO:0015294	GO:0015296	GO:0015318	GO:0015370	GO:0015373	GO:0015377	GO:0015378	GO:0015379	GO:0015672	GO:0015698	GO:0016020	GO:0016021	GO:0022804	GO:0022857	GO:0022890	GO:0030001	GO:0031410
BMK_Unigene_013634	GO:0005524	GO:0005975	GO:0016773
BMK_Unigene_013723	GO:0046872	GO:0051213
BMK_Unigene_013994	GO:0000272	GO:0016161	GO:0102229
BMK_Unigene_014128	GO:0003853	GO:0050660
BMK_Unigene_014277	GO:0004674	GO:0005524
BMK_Unigene_014341	GO:0016620
BMK_Unigene_014436	GO:0000151	GO:0000209	GO:0003674	GO:0003824	GO:0004842	GO:0005488	GO:0005515	GO:0005575	GO:0005622	GO:0005623	GO:0005737	GO:0006464	GO:0006807	GO:0008150	GO:0008152	GO:0009893	GO:0009894	GO:0009896	GO:0009987	GO:0010604	GO:0016567	GO:0016740	GO:0019222	GO:0019538	GO:0019787	GO:0019899	GO:0030162	GO:0031323	GO:0031325	GO:0031329	GO:0031331	GO:0031624	GO:0032268	GO:0032270	GO:0032434	GO:0032436	GO:0032446	GO:0032991	GO:0036211	GO:0042176	GO:0043170	GO:0043412	GO:0044237	GO:0044238	GO:0044260	GO:0044267	GO:0044390	GO:0044424	GO:0044464
BMK_Unigene_014930	GO:0000155	GO:0005783	GO:0016021	GO:0038199	GO:0051740
BMK_Unigene_015214	GO:0003779	GO:0005509	GO:0005515
BMK_Unigene_015532	GO:0002682	GO:0002684	GO:0005575	GO:0005622	GO:0005623	GO:0005737	GO:0005783	GO:0005788	GO:0005886	GO:0006457	GO:0008150	GO:0009605	GO:0009607	GO:0012505	GO:0016020	GO:0031347	GO:0031349	GO:0031974	GO:0032991	GO:0034663	GO:0035821	GO:0043207	GO:0043226	GO:0043227	GO:0043229	GO:0043231	GO:0043233	GO:0044003	GO:0044403	GO:0044419	GO:0044422	GO:0044424	GO:0044432	GO:0044444	GO:0044446	GO:0044464	GO:0045088	GO:0045089	GO:0048518	GO:0048583	GO:0048584	GO:0050776	GO:0050778	GO:0050789	GO:0050896	GO:0051082	GO:0051701	GO:0051704	GO:0051707
BMK_Unigene_016269	GO:0005769	GO:0034314	GO:0043014	GO:0071203
BMK_Unigene_016676	GO:0004866
BMK_Unigene_016716	GO:0010265
BMK_Unigene_016824	GO:0000003	GO:0000254	GO:0003006	GO:0003674	GO:0003824	GO:0004497	GO:0005575	GO:0005622	GO:0005623	GO:0005737	GO:0005783	GO:0005789	GO:0006629	GO:0006694	GO:0007275	GO:0008150	GO:0008152	GO:0008202	GO:0008610	GO:0009058	GO:0009507	GO:0009526	GO:0009536	GO:0009790	GO:0009791	GO:0009793	GO:0009941	GO:0009987	GO:0010154	GO:0012505	GO:0016020	GO:0016125	GO:0016126	GO:0016491	GO:0016705	GO:0016709	GO:0022414	GO:0030258	GO:0031967	GO:0031975	GO:0031984	GO:0032501	GO:0032502	GO:0034440	GO:0042175	GO:0043226	GO:0043227	GO:0043229	GO:0043231
BMK_Unigene_017331	GO:0004672	GO:0005524
BMK_Unigene_017537	GO:0016021	GO:0022857	GO:0055085
BMK_Unigene_017726	GO:0002252	GO:0002376	GO:0003674	GO:0003676	GO:0003723	GO:0003729	GO:0005488	GO:0005575	GO:0005622	GO:0005623	GO:0005634	GO:0005737	GO:0005829	GO:0006950	GO:0006952	GO:0008150	GO:0009605	GO:0009607	GO:0009615	GO:0009617	GO:0016032	GO:0019048	GO:0031047	GO:0035197	GO:0035821	GO:0042742	GO:0043207	GO:0043226	GO:0043227	GO:0043229	GO:0043231	GO:0044003	GO:0044403	GO:0044419	GO:0044424	GO:0044444	GO:0044464	GO:0050896	GO:0051607	GO:0051701	GO:0051704	GO:0051707	GO:0051817	GO:0061980	GO:0097159	GO:0098542	GO:1901363
BMK_Unigene_017759	GO:0005575	GO:0005622	GO:0005623	GO:0005737	GO:0005783	GO:0005886	GO:0012505	GO:0016020	GO:0016021	GO:0043226	GO:0043227	GO:0043229	GO:0043231	GO:0044424	GO:0044444	GO:0044464	GO:0071944
BMK_Unigene_017776	GO:0005524
BMK_Unigene_017860	GO:0004674	GO:0005524
BMK_Unigene_017963	GO:0004617	GO:0004648	GO:0006564	GO:0051287
BMK_Unigene_018117	GO:0003774	GO:0005524	GO:0016459	GO:0051015
BMK_Unigene_018122	GO:0042302
BMK_Unigene_018128	GO:0016021	GO:0016125	GO:0047750
BMK_Unigene_018145	GO:0000139	GO:0005198	GO:0006886	GO:0016192	GO:0030117	GO:0030663
BMK_Unigene_018150	GO:0005739	GO:0006099	GO:0009055	GO:0009060	GO:0022904	GO:0051537
BMK_Unigene_018164	GO:0000003	GO:0003006	GO:0005575	GO:0005622	GO:0005623	GO:0005634	GO:0005737	GO:0005768	GO:0005794	GO:0005802	GO:0005829	GO:0005886	GO:0007154	GO:0007165	GO:0007275	GO:0008150	GO:0008361	GO:0009314	GO:0009416	GO:0009628	GO:0009639	GO:0009791	GO:0009888	GO:0009960	GO:0009987	GO:0010017	GO:0010154	GO:0010468	GO:0012505	GO:0016020	GO:0016021	GO:0016043	GO:0019222	GO:0022414	GO:0023052	GO:0031410	GO:0031982	GO:0031984	GO:0032501	GO:0032502	GO:0032535	GO:0040008	GO:0042592	GO:0043226	GO:0043227	GO:0043229	GO:0043231	GO:0044422	GO:0044424
BMK_Unigene_018165	GO:0003676	GO:0031047
BMK_Unigene_018206	GO:0003735	GO:0005840	GO:0006412	GO:0008097
BMK_Unigene_018211	GO:0003779	GO:0007010
BMK_Unigene_018249	GO:0003924	GO:0005525	GO:0007186	GO:0019001	GO:0031683
BMK_Unigene_018502	GO:0000287	GO:0004743	GO:0006096	GO:0016301	GO:0030955
BMK_Unigene_018638	GO:0003674	GO:0003735	GO:0005198	GO:0005575	GO:0005618	GO:0005622	GO:0005623	GO:0005737	GO:0005829	GO:0005840	GO:0005886	GO:0005911	GO:0006412	GO:0006518	GO:0006807	GO:0008150	GO:0008152	GO:0009058	GO:0009059	GO:0009506	GO:0009507	GO:0009536	GO:0009719	GO:0009725	GO:0009735	GO:0009987	GO:0010033	GO:0010467	GO:0015934	GO:0016020	GO:0019538	GO:0022625	GO:0022626	GO:0030054	GO:0030312	GO:0032991	GO:0034641	GO:0034645	GO:0042221	GO:0043043	GO:0043170	GO:0043226	GO:0043227	GO:0043228	GO:0043229	GO:0043231	GO:0043232	GO:0043603	GO:0043604
BMK_Unigene_018662	GO:0005515
BMK_Unigene_018671	GO:0003924	GO:0005525
BMK_Unigene_018707	GO:0000123	GO:0003713	GO:0004402	GO:0005634	GO:0006355	GO:0016573
BMK_Unigene_019004	GO:0035091
BMK_Unigene_019025	GO:0016491
BMK_Unigene_019148	GO:0005524	GO:0005832	GO:0006457	GO:0051082
BMK_Unigene_019626	GO:0002184	GO:0005829	GO:0016149	GO:0018444	GO:1990825
BMK_Unigene_019672	GO:0005515
BMK_Unigene_019778	GO:0004129	GO:0005743
BMK_Unigene_019839	GO:0000287	GO:0004450	GO:0006099	GO:0006102	GO:0051287
BMK_Unigene_020029	GO:0003735	GO:0005840	GO:0006412
BMK_Unigene_020140	GO:0003674	GO:0005215	GO:0005351	GO:0005402	GO:0005575	GO:0005623	GO:0005886	GO:0006810	GO:0006811	GO:0006812	GO:0008150	GO:0008324	GO:0008506	GO:0008515	GO:0008643	GO:0009669	GO:0015075	GO:0015077	GO:0015078	GO:0015144	GO:0015154	GO:0015157	GO:0015291	GO:0015293	GO:0015294	GO:0015295	GO:0015318	GO:0015672	GO:0015766	GO:0015770	GO:0015772	GO:0016020	GO:0022804	GO:0022857	GO:0022890	GO:0034219	GO:0034220	GO:0044464	GO:0051179	GO:0051234	GO:0055085	GO:0071702	GO:0071944	GO:0098655	GO:0098660	GO:0098662	GO:1902600
BMK_Unigene_020807	GO:0000182	GO:0003674	GO:0003676	GO:0003677	GO:0003690	GO:0003700	GO:0003723	GO:0005488	GO:0005575	GO:0005622	GO:0005623	GO:0005634	GO:0005730	GO:0006355	GO:0008097	GO:0008150	GO:0009889	GO:0010468	GO:0010556	GO:0019219	GO:0019222	GO:0019843	GO:0022613	GO:0031323	GO:0031326	GO:0031974	GO:0031981	GO:0042254	GO:0042273	GO:0043226	GO:0043227	GO:0043228	GO:0043229	GO:0043231	GO:0043232	GO:0043233	GO:0043565	GO:0044085	GO:0044422	GO:0044424	GO:0044428	GO:0044446	GO:0044464	GO:0050789	GO:0050794	GO:0051171	GO:0051252	GO:0060255	GO:0065007
BMK_Unigene_020846	GO:0016021	GO:0016788
BMK_Unigene_022383	GO:0031929	GO:0031931
BMK_Unigene_022648	GO:0005524	GO:0042393
BMK_Unigene_023860	GO:0008150	GO:0009888	GO:0010073	GO:0032501	GO:0032502	GO:0048507	GO:0048856
BMK_Unigene_023919	GO:0045454
BMK_Unigene_024266	GO:0001101	GO:0002831	GO:0003674	GO:0003676	GO:0003677	GO:0005488	GO:0005575	GO:0005622	GO:0005623	GO:0005634	GO:0006355	GO:0006950	GO:0006970	GO:0008150	GO:0009314	GO:0009414	GO:0009415	GO:0009416	GO:0009628	GO:0009642	GO:0009646	GO:0009651	GO:0009719	GO:0009725	GO:0009737	GO:0009787	GO:0009788	GO:0009889	GO:0009890	GO:0009891	GO:0009892	GO:0009893	GO:0009966	GO:0009968	GO:0010033	GO:0010035	GO:0010468	GO:0010556	GO:0010557	GO:0010558	GO:0010604	GO:0010605	GO:0010628	GO:0010629	GO:0010646	GO:0010648	GO:0019219	GO:0019222	GO:0023051
BMK_Unigene_024819	GO:0000309	GO:0004515	GO:0005524	GO:0009435
BMK_Unigene_025839	GO:0003755	GO:0006457
BMK_Unigene_026033	GO:0001101	GO:0005575	GO:0005911	GO:0006950	GO:0008150	GO:0009266	GO:0009408	GO:0009506	GO:0009628	GO:0009719	GO:0009725	GO:0009751	GO:0010033	GO:0010286	GO:0014070	GO:0030054	GO:0042221	GO:0042493	GO:0046677	GO:0050896	GO:0055044	GO:1901700
BMK_Unigene_026677	GO:0006364	GO:0030688
BMK_Unigene_026722	GO:0006508	GO:0008234
BMK_Unigene_026791	GO:0003735	GO:0005840	GO:0006412
BMK_Unigene_026850	GO:0000287	GO:0010333
BMK_Unigene_027393	GO:0003924	GO:0005525
BMK_Unigene_028352	GO:0003735	GO:0005840	GO:0006414
BMK_Unigene_028446	GO:0046983
BMK_Unigene_028884	GO:0003735	GO:0005840	GO:0006412	GO:0008097
BMK_Unigene_029198	GO:0042302
BMK_Unigene_029443	GO:0003950
BMK_Unigene_029484	GO:0003674	GO:0003735	GO:0005198	GO:0005575	GO:0005618	GO:0005622	GO:0005623	GO:0005737	GO:0005829	GO:0005840	GO:0005886	GO:0005911	GO:0006412	GO:0006518	GO:0006807	GO:0008150	GO:0008152	GO:0009058	GO:0009059	GO:0009506	GO:0009507	GO:0009536	GO:0009719	GO:0009725	GO:0009735	GO:0009987	GO:0010033	GO:0010467	GO:0015934	GO:0016020	GO:0019538	GO:0022625	GO:0022626	GO:0030054	GO:0030312	GO:0032991	GO:0034641	GO:0034645	GO:0042221	GO:0043043	GO:0043170	GO:0043226	GO:0043227	GO:0043228	GO:0043229	GO:0043231	GO:0043232	GO:0043603	GO:0043604
BMK_Unigene_029581	GO:0008146
BMK_Unigene_029748	GO:0016491	GO:0046872
BMK_Unigene_030851	GO:0003844	GO:0005978	GO:0043169
BMK_Unigene_031252	GO:0003676
BMK_Unigene_031348	GO:0005576	GO:0006955	GO:0008009
BMK_Unigene_032383	GO:0004181	GO:0006508	GO:0008270
BMK_Unigene_033002	GO:0003735	GO:0005840	GO:0006412
BMK_Unigene_033096	GO:0001819	GO:0008284	GO:0010884
BMK_Unigene_036687	GO:0016787
BMK_Unigene_037209	GO:0008234
BMK_Unigene_038049	GO:0016491	GO:0055114
BMK_Unigene_038880	GO:0005739	GO:0006120	GO:0008137	GO:0016021	GO:0042773	GO:0055114
BMK_Unigene_039085	GO:0003756	GO:0045454
BMK_Unigene_039113	GO:0005575	GO:0005911	GO:0009506	GO:0016020	GO:0016021	GO:0022857	GO:0030054	GO:0055044	GO:0055085
BMK_Unigene_039170	GO:0000470	GO:0003674	GO:0003676	GO:0003723	GO:0003735	GO:0005198	GO:0005488	GO:0005575	GO:0005622	GO:0005623	GO:0005634	GO:0005730	GO:0005737	GO:0005773	GO:0005774	GO:0005829	GO:0005840	GO:0005844	GO:0005911	GO:0006139	GO:0006364	GO:0006396	GO:0006412	GO:0006518	GO:0006725	GO:0006807	GO:0008150	GO:0008152	GO:0009058	GO:0009059	GO:0009506	GO:0009507	GO:0009536	GO:0009987	GO:0010467	GO:0015934	GO:0016020	GO:0016070	GO:0016072	GO:0019538	GO:0022613	GO:0022625	GO:0022626	GO:0030054	GO:0031090	GO:0031974	GO:0031981	GO:0032991	GO:0034470
BMK_Unigene_039182	GO:0000243	GO:0000375	GO:0000377	GO:0000398	GO:0003674	GO:0003676	GO:0003723	GO:0003729	GO:0005488	GO:0005575	GO:0005622	GO:0005623	GO:0005634	GO:0005681	GO:0005684	GO:0005685	GO:0006139	GO:0006396	GO:0006397	GO:0006725	GO:0006807	GO:0008150	GO:0008152	GO:0008380	GO:0009987	GO:0010467	GO:0016070	GO:0016071	GO:0017069	GO:0030532	GO:0030619	GO:0032991	GO:0034641	GO:0043170	GO:0043226	GO:0043227	GO:0043229	GO:0043231	GO:0044237	GO:0044238	GO:0044422	GO:0044424	GO:0044428	GO:0044446	GO:0044464	GO:0046483	GO:0071004	GO:0071010	GO:0071011
BMK_Unigene_039194	GO:0046872
BMK_Unigene_039465	GO:0016021	GO:0016491	GO:0016740
BMK_Unigene_039492	GO:0016021
BMK_Unigene_039529	GO:0005515
BMK_Unigene_039588	GO:0004252
BMK_Unigene_039668	GO:0005525
BMK_Unigene_039807	GO:0005515
BMK_Unigene_039825	GO:0004497	GO:0005506	GO:0016021	GO:0016705	GO:0020037	GO:0055114
BMK_Unigene_039834	GO:0004748	GO:0005524	GO:0006260
BMK_Unigene_039991	GO:0000003	GO:0000228	GO:0000785	GO:0000790	GO:0000791	GO:0002252	GO:0002376	GO:0003006	GO:0003674	GO:0003676	GO:0003682	GO:0003723	GO:0003824	GO:0004518	GO:0004519	GO:0004521	GO:0004540	GO:0005488	GO:0005575	GO:0005622	GO:0005623	GO:0005634	GO:0005654	GO:0005694	GO:0005719	GO:0005730	GO:0005737	GO:0006139	GO:0006259	GO:0006304	GO:0006305	GO:0006306	GO:0006325	GO:0006342	GO:0006355	GO:0006396	GO:0006464	GO:0006479	GO:0006725	GO:0006807	GO:0006950	GO:0006952	GO:0006955	GO:0006996	GO:0007049	GO:0007275	GO:0008150	GO:0008152	GO:0008213
BMK_Unigene_040085	GO:0008234
BMK_Unigene_040131	GO:0008270	GO:0016491
BMK_Unigene_040211	GO:0003735	GO:0005840	GO:0006412
BMK_Unigene_040425	GO:0003676	GO:0003723
BMK_Unigene_040439	GO:0008654	GO:0016021	GO:0016780
BMK_Unigene_040555	GO:0004576	GO:0006486	GO:0016021
BMK_Unigene_040559	GO:0001503	GO:0007155
BMK_Unigene_040714	GO:0003756	GO:0045454
BMK_Unigene_040816	GO:0000003	GO:0003006	GO:0005575	GO:0005623	GO:0005886	GO:0007275	GO:0008150	GO:0009790	GO:0009791	GO:0009793	GO:0010154	GO:0016020	GO:0022414	GO:0022622	GO:0032501	GO:0032502	GO:0044464	GO:0048316	GO:0048364	GO:0048367	GO:0048608	GO:0048731	GO:0048856	GO:0061458	GO:0071944	GO:0099402
BMK_Unigene_040835	GO:0003723	GO:0004525	GO:0005524	GO:0006396
BMK_Unigene_041392	GO:0003735	GO:0005840	GO:0006412
BMK_Unigene_041411	GO:0005086	GO:0016614	GO:0032012	GO:0050660
BMK_Unigene_041551	GO:0003735	GO:0005840	GO:0006412
BMK_Unigene_041572	GO:0004491
BMK_Unigene_041611	GO:0005515	GO:0016301
BMK_Unigene_041669	GO:0006886	GO:0006955	GO:0016020	GO:0016021	GO:0019882	GO:0042289
BMK_Unigene_041676	GO:0004672	GO:0005524
BMK_Unigene_041693	GO:0005198	GO:0006886	GO:0016192	GO:0030130	GO:0030132
BMK_Unigene_041728	GO:0003723	GO:0003735	GO:0005840	GO:0006412
BMK_Unigene_041874	GO:0003674	GO:0004857	GO:0004866	GO:0004867	GO:0004869	GO:0005575	GO:0005576	GO:0005615	GO:0005622	GO:0005623	GO:0005634	GO:0005737	GO:0005829	GO:0006139	GO:0006259	GO:0006281	GO:0006725	GO:0006807	GO:0006950	GO:0006974	GO:0008150	GO:0008152	GO:0009892	GO:0009987	GO:0010466	GO:0010605	GO:0010951	GO:0019222	GO:0030162	GO:0030234	GO:0030414	GO:0031323	GO:0031324	GO:0032268	GO:0032269	GO:0033554	GO:0034641	GO:0043086	GO:0043170	GO:0043226	GO:0043227	GO:0043229	GO:0043231	GO:0044092	GO:0044237	GO:0044238	GO:0044260	GO:0044421	GO:0044424
BMK_Unigene_041986	GO:0046983
BMK_Unigene_042353	GO:0003723	GO:0005737
BMK_Unigene_042358	GO:0004364	GO:0005737	GO:0043295
BMK_Unigene_042374	GO:0003735	GO:0005840	GO:0006412
BMK_Unigene_042395	GO:0003676	GO:0004386	GO:0005524
BMK_Unigene_042551	GO:0000166	GO:0000288	GO:0000291	GO:0000956	GO:0001882	GO:0001883	GO:0003674	GO:0003824	GO:0003924	GO:0005488	GO:0005525	GO:0005575	GO:0005622	GO:0005623	GO:0005737	GO:0005829	GO:0006139	GO:0006401	GO:0006402	GO:0006412	GO:0006518	GO:0006725	GO:0006807	GO:0007154	GO:0007165	GO:0008150	GO:0008152	GO:0009056	GO:0009057	GO:0009058	GO:0009059	GO:0009892	GO:0009987	GO:0010467	GO:0010468	GO:0010605	GO:0010629	GO:0016070	GO:0016071	GO:0016462	GO:0016787	GO:0016817	GO:0016818	GO:0017076	GO:0017111	GO:0019001	GO:0019222	GO:0019439	GO:0019538
BMK_Unigene_042603	GO:0003676
BMK_Unigene_042635	GO:0005507	GO:0005524	GO:0016021	GO:0019829	GO:0030001
BMK_Unigene_042748	GO:0005337	GO:0016021	GO:1901642
BMK_Unigene_042802	GO:0005739	GO:0005747	GO:0022900
BMK_Unigene_042919	GO:0005515
BMK_Unigene_043056	GO:0000981	GO:0008270	GO:0042025
BMK_Unigene_043474	GO:0000166	GO:0004383	GO:0006182	GO:0020037	GO:0035556
BMK_Unigene_043962	GO:0008270	GO:0016491	GO:0055114
BMK_Unigene_043983	GO:0004222	GO:0006508	GO:0007155	GO:0016020	GO:0016021
BMK_Unigene_044018	GO:0042254
BMK_Unigene_044099	GO:0000786	GO:0003677	GO:0005634	GO:0046982
BMK_Unigene_044122	GO:0043531
BMK_Unigene_044168	GO:0003735	GO:0005840	GO:0006412
BMK_Unigene_044180	GO:0004725	GO:0006470
BMK_Unigene_044206	GO:0004616	GO:0006098	GO:0019521	GO:0050661
BMK_Unigene_044261	GO:0000104	GO:0005749	GO:0006099	GO:0006121	GO:0008177	GO:0009055	GO:0016491	GO:0050660
BMK_Unigene_044279	GO:0042302
BMK_Unigene_044280	GO:0000774	GO:0006457	GO:0042803	GO:0051087
BMK_Unigene_044374	GO:0003723	GO:0005737
BMK_Unigene_044492	GO:0003924	GO:0004222	GO:0005525	GO:0006508	GO:0016021
BMK_Unigene_044548	GO:0005524
BMK_Unigene_044567	GO:0004252	GO:0006508
BMK_Unigene_044615	GO:0003735	GO:0005840	GO:0006412
BMK_Unigene_044622	GO:0004672
BMK_Unigene_044626	GO:0003746	GO:0003924	GO:0005525
BMK_Unigene_044750	GO:0008083	GO:0008201	GO:0016020
BMK_Unigene_044921	GO:0003868	GO:0009072	GO:0046872
BMK_Unigene_045111	GO:0003735	GO:0005840	GO:0006412
BMK_Unigene_045135	GO:0000166	GO:0003674	GO:0003824	GO:0003845	GO:0005488	GO:0005496	GO:0005575	GO:0005622	GO:0005623	GO:0005634	GO:0005635	GO:0005737	GO:0005783	GO:0005789	GO:0005791	GO:0006109	GO:0006140	GO:0006629	GO:0006694	GO:0006704	GO:0006706	GO:0006713	GO:0008150	GO:0008152	GO:0008202	GO:0008211	GO:0008289	GO:0008610	GO:0009056	GO:0009058	GO:0009605	GO:0009719	GO:0009725	GO:0009894	GO:0009987	GO:0009991	GO:0010033	GO:0010675	GO:0010817	GO:0012505	GO:0014070	GO:0016020	GO:0016042	GO:0016229	GO:0016491	GO:0016614	GO:0016616	GO:0019219	GO:0019220
BMK_Unigene_045159	GO:0000159	GO:0007165	GO:0019888
BMK_Unigene_045172	GO:0003756	GO:0045454
BMK_Unigene_045188	GO:0003735	GO:0005840	GO:0006412
BMK_Unigene_045199	GO:0005515
BMK_Unigene_045290	GO:0004707	GO:0005524
BMK_Unigene_045292	GO:0003723	GO:0003735	GO:0005840	GO:0006412
BMK_Unigene_045299	GO:0004812	GO:0004829	GO:0005524	GO:0005739	GO:0006418	GO:0006435	GO:0009507
BMK_Unigene_045366	GO:0003779	GO:0030837
BMK_Unigene_045399	GO:0016021	GO:0046982
BMK_Unigene_045452	GO:0004427	GO:0009678	GO:0016021
BMK_Unigene_045490	GO:0000139	GO:0005789	GO:0006886	GO:0008270	GO:0030127	GO:0090114
BMK_Unigene_045580	GO:0003735	GO:0005840	GO:0006412
BMK_Unigene_045630	GO:0005515
BMK_Unigene_045702	GO:0016021
BMK_Unigene_045746	GO:0016491
BMK_Unigene_045774	GO:0003735	GO:0005840	GO:0006412
BMK_Unigene_045785	GO:0000003	GO:0003006	GO:0003674	GO:0003779	GO:0003785	GO:0003824	GO:0005488	GO:0005515	GO:0005575	GO:0005623	GO:0005886	GO:0006629	GO:0006644	GO:0006650	GO:0006793	GO:0006796	GO:0007275	GO:0008092	GO:0008150	GO:0008152	GO:0009605	GO:0009606	GO:0009628	GO:0009629	GO:0009630	GO:0009653	GO:0009791	GO:0009958	GO:0009987	GO:0010015	GO:0010101	GO:0010102	GO:0010311	GO:0016020	GO:0016301	GO:0016307	GO:0016308	GO:0016310	GO:0016740	GO:0016772	GO:0016773	GO:0019637	GO:0022414	GO:0022622	GO:0030258	GO:0032501	GO:0032502	GO:0040007	GO:0044237
BMK_Unigene_045809	GO:0004867	GO:0009611
BMK_Unigene_045865	GO:0020037
BMK_Unigene_045891	GO:0004864	GO:0006952	GO:0009738	GO:0010427	GO:0038023
BMK_Unigene_045926	GO:0016491	GO:0071949
BMK_Unigene_045996	GO:0004069	GO:0006520	GO:0009058	GO:0030170
BMK_Unigene_046025	GO:0003735	GO:0005840	GO:0006412	GO:0008097
BMK_Unigene_046057	GO:0000381	GO:0003723
BMK_Unigene_046317	GO:0005634	GO:0006334
BMK_Unigene_046343	GO:0005576	GO:0006955	GO:0008009
BMK_Unigene_046378	GO:0003735	GO:0006412	GO:0015934
BMK_Unigene_046418	GO:0008237	GO:0016805	GO:0046872
BMK_Unigene_046508	GO:0004129	GO:0005507	GO:0005575	GO:0005622	GO:0005623	GO:0005737	GO:0005739	GO:0005740	GO:0005743	GO:0005746	GO:0005751	GO:0006091	GO:0006119	GO:0006139	GO:0006163	GO:0006725	GO:0006753	GO:0006793	GO:0006796	GO:0006807	GO:0008150	GO:0008152	GO:0009117	GO:0009123	GO:0009126	GO:0009141	GO:0009144	GO:0009150	GO:0009161	GO:0009167	GO:0009199	GO:0009205	GO:0009259	GO:0009987	GO:0015980	GO:0016020	GO:0016021	GO:0016310	GO:0017144	GO:0019637	GO:0019693	GO:0019866	GO:0022900	GO:0022904	GO:0031090	GO:0031966	GO:0031967	GO:0031975	GO:0032991
BMK_Unigene_046510	GO:0003676	GO:0003723	GO:0005634	GO:0051252	GO:1990904
BMK_Unigene_046516	GO:0004672	GO:0005524	GO:0016021
BMK_Unigene_046701	GO:0005524	GO:0016308
BMK_Unigene_046815	GO:0003735	GO:0005840	GO:0006412
BMK_Unigene_046923	GO:0005515
BMK_Unigene_047095	GO:0003674	GO:0003824	GO:0004553	GO:0004568	GO:0005975	GO:0006032	GO:0008061	GO:0016787	GO:0016798	GO:0016998
BMK_Unigene_047193	GO:0042626
BMK_Unigene_047349	GO:0000166	GO:0003674	GO:0003824	GO:0003845	GO:0005488	GO:0005496	GO:0005575	GO:0005622	GO:0005623	GO:0005634	GO:0005635	GO:0005737	GO:0005783	GO:0005789	GO:0005791	GO:0006109	GO:0006140	GO:0006629	GO:0006694	GO:0006704	GO:0006706	GO:0006713	GO:0008150	GO:0008152	GO:0008202	GO:0008211	GO:0008289	GO:0008610	GO:0009056	GO:0009058	GO:0009605	GO:0009719	GO:0009725	GO:0009894	GO:0009987	GO:0009991	GO:0010033	GO:0010675	GO:0010817	GO:0012505	GO:0014070	GO:0016020	GO:0016042	GO:0016229	GO:0016491	GO:0016614	GO:0016616	GO:0019219	GO:0019220
BMK_Unigene_047365	GO:0004721	GO:0046872
BMK_Unigene_047636	GO:0003674	GO:0005488	GO:0005515	GO:0005575	GO:0005622	GO:0005623	GO:0005737	GO:0005768	GO:0005770	GO:0005773	GO:0005829	GO:0006914	GO:0008150	GO:0008152	GO:0008270	GO:0009056	GO:0009987	GO:0012505	GO:0016043	GO:0016236	GO:0022607	GO:0031410	GO:0031982	GO:0032182	GO:0034622	GO:0043130	GO:0043226	GO:0043227	GO:0043229	GO:0043231	GO:0043933	GO:0044085	GO:0044237	GO:0044248	GO:0044424	GO:0044444	GO:0044464	GO:0051258	GO:0051259	GO:0061919	GO:0065003	GO:0071840	GO:0097708
BMK_Unigene_047924	GO:0005575	GO:0005622	GO:0005623	GO:0005737	GO:0005794	GO:0005802	GO:0005886	GO:0008150	GO:0012505	GO:0016020	GO:0016021	GO:0031984	GO:0042592	GO:0043226	GO:0043227	GO:0043229	GO:0043231	GO:0044422	GO:0044424	GO:0044431	GO:0044444	GO:0044446	GO:0044464	GO:0048878	GO:0050801	GO:0055062	GO:0055065	GO:0055069	GO:0055076	GO:0055080	GO:0055081	GO:0055083	GO:0065007	GO:0065008	GO:0071944	GO:0072505	GO:0072506	GO:0072507	GO:0098771	GO:0098791
BMK_Unigene_048058	GO:0004035
BMK_Unigene_048113	GO:0000028	GO:0003735	GO:0006412	GO:0022627
BMK_Unigene_048175	GO:0016020
BMK_Unigene_048253	GO:0005515
BMK_Unigene_048285	GO:0003674	GO:0003824	GO:0004147	GO:0005488	GO:0005515	GO:0005575	GO:0005622	GO:0005623	GO:0005737	GO:0005739	GO:0005759	GO:0005947	GO:0006950	GO:0007154	GO:0008150	GO:0008270	GO:0009267	GO:0009295	GO:0009314	GO:0009416	GO:0009605	GO:0009628	GO:0009642	GO:0009646	GO:0009743	GO:0009744	GO:0009987	GO:0009991	GO:0010033	GO:0016407	GO:0016417	GO:0016491	GO:0016740	GO:0016746	GO:0016747	GO:0019899	GO:0030062	GO:0030523	GO:0031625	GO:0031667	GO:0031668	GO:0031669	GO:0031974	GO:0032991	GO:0033554	GO:0034285	GO:0042221	GO:0042594	GO:0042645
BMK_Unigene_048291	GO:0003676	GO:0005575	GO:0005623	GO:0005886	GO:0005911	GO:0008270	GO:0009506	GO:0016020	GO:0030054	GO:0042995	GO:0044464	GO:0055044	GO:0071944	GO:0090406	GO:0120025
BMK_Unigene_048336	GO:0005524	GO:0005737	GO:0005829	GO:0005886	GO:0006457	GO:0009986	GO:0032991	GO:0034605	GO:0048471	GO:0050821	GO:0051082
BMK_Unigene_048435	GO:0003735	GO:0005840	GO:0006412
BMK_Unigene_048468	GO:0005524	GO:0005778	GO:0006082	GO:0006605	GO:0006625	GO:0006629	GO:0006631	GO:0006635	GO:0006810	GO:0006886	GO:0006996	GO:0007031	GO:0008104	GO:0008150	GO:0008152	GO:0009056	GO:0009062	GO:0009987	GO:0015031	GO:0015833	GO:0015919	GO:0016042	GO:0016043	GO:0016054	GO:0016558	GO:0016887	GO:0017038	GO:0019395	GO:0019752	GO:0030258	GO:0032787	GO:0033036	GO:0033365	GO:0034440	GO:0034613	GO:0042886	GO:0043436	GO:0043574	GO:0044237	GO:0044238	GO:0044242	GO:0044248	GO:0044255	GO:0044281	GO:0044282	GO:0044743	GO:0045184	GO:0046395	GO:0046907
BMK_Unigene_048559	GO:0003844	GO:0005978	GO:0043169
BMK_Unigene_048562	GO:0009058	GO:0016779
BMK_Unigene_048608	GO:0000287	GO:0004450	GO:0006099	GO:0006102	GO:0051287
BMK_Unigene_048717	GO:0005525
BMK_Unigene_048739	GO:0003857	GO:0006631
BMK_Unigene_048890	GO:0005515	GO:0007165
BMK_Unigene_048893	GO:0000902	GO:0000904	GO:0005575	GO:0005622	GO:0005623	GO:0005737	GO:0005829	GO:0005856	GO:0005885	GO:0006996	GO:0007010	GO:0007015	GO:0008150	GO:0009653	GO:0009825	GO:0009888	GO:0009987	GO:0010026	GO:0010090	GO:0015629	GO:0016043	GO:0016049	GO:0030029	GO:0030036	GO:0030154	GO:0032502	GO:0032989	GO:0032991	GO:0040007	GO:0043226	GO:0043228	GO:0043229	GO:0043232	GO:0044422	GO:0044424	GO:0044430	GO:0044444	GO:0044446	GO:0044464	GO:0048468	GO:0048856	GO:0048869	GO:0071840	GO:0090558	GO:0090626	GO:0097435
BMK_Unigene_048894	GO:0004252
BMK_Unigene_048918	GO:0004252
BMK_Unigene_049014	GO:0007155	GO:0051015
BMK_Unigene_049033	GO:0005575	GO:0005622	GO:0005623	GO:0005737	GO:0005739	GO:0005740	GO:0005758	GO:0009055	GO:0020037	GO:0031967	GO:0031970	GO:0031974	GO:0031975	GO:0043226	GO:0043227	GO:0043229	GO:0043231	GO:0043233	GO:0044422	GO:0044424	GO:0044429	GO:0044444	GO:0044446	GO:0044464	GO:0070013
BMK_Unigene_049181	GO:0004550	GO:0005524	GO:0006183	GO:0006228	GO:0006241
BMK_Unigene_049261	GO:0003735	GO:0005840	GO:0006412
BMK_Unigene_049286	GO:0003676	GO:0004523	GO:0015074
BMK_Unigene_049292	GO:0016021
BMK_Unigene_049304	GO:0005515
BMK_Unigene_049341	GO:0005524	GO:0016740
BMK_Unigene_049391	GO:0004553	GO:0030245
BMK_Unigene_049399	GO:0008194
BMK_Unigene_049413	GO:0004869
BMK_Unigene_049414	GO:0002009	GO:0002165	GO:0003674	GO:0005198	GO:0005201	GO:0005575	GO:0005576	GO:0007275	GO:0007424	GO:0007444	GO:0007472	GO:0007475	GO:0007476	GO:0007552	GO:0007560	GO:0007591	GO:0008150	GO:0008362	GO:0008587	GO:0009653	GO:0009791	GO:0009886	GO:0009887	GO:0009888	GO:0022404	GO:0031012	GO:0032501	GO:0032502	GO:0035107	GO:0035114	GO:0035120	GO:0035220	GO:0035239	GO:0035295	GO:0040003	GO:0040005	GO:0042303	GO:0042335	GO:0044421	GO:0044719	GO:0048513	GO:0048563	GO:0048569	GO:0048707	GO:0048729	GO:0048731	GO:0048736	GO:0048737	GO:0048856
BMK_Unigene_049450	GO:0000003	GO:0000123	GO:0003006	GO:0003674	GO:0005488	GO:0005515	GO:0005575	GO:0005622	GO:0005623	GO:0005634	GO:0005654	GO:0005815	GO:0005856	GO:0005929	GO:0006325	GO:0006464	GO:0006473	GO:0006475	GO:0006479	GO:0006807	GO:0006996	GO:0007275	GO:0007399	GO:0008150	GO:0008152	GO:0008213	GO:0009791	GO:0009987	GO:0010228	GO:0015630	GO:0016043	GO:0016569	GO:0016570	GO:0016571	GO:0016573	GO:0018022	GO:0018193	GO:0018205	GO:0018393	GO:0018394	GO:0019538	GO:0022008	GO:0022414	GO:0022607	GO:0030030	GO:0030031	GO:0030154	GO:0030182	GO:0031175
BMK_Unigene_049549	GO:0004190
BMK_Unigene_049663	GO:0015074
BMK_Unigene_049684	GO:0000139	GO:0005198	GO:0006886	GO:0006888	GO:0006890	GO:0006891	GO:0030126
BMK_Unigene_049694	GO:0000003	GO:0003006	GO:0003674	GO:0003824	GO:0005488	GO:0005575	GO:0005623	GO:0005886	GO:0007275	GO:0008150	GO:0008289	GO:0009787	GO:0009791	GO:0009966	GO:0010154	GO:0010162	GO:0010231	GO:0010427	GO:0010431	GO:0010646	GO:0016020	GO:0019840	GO:0019898	GO:0021700	GO:0022414	GO:0022611	GO:0023051	GO:0031406	GO:0032501	GO:0032502	GO:0032504	GO:0033293	GO:0036094	GO:0042562	GO:0043167	GO:0043168	GO:0043177	GO:0043178	GO:0044425	GO:0044464	GO:0048316	GO:0048583	GO:0048608	GO:0048609	GO:0048731	GO:0048856	GO:0050789	GO:0050794	GO:0061458
BMK_Unigene_049739	GO:0009058	GO:0016740	GO:0030170
BMK_Unigene_049779	GO:0000003	GO:0000902	GO:0000904	GO:0001101	GO:0003006	GO:0003674	GO:0003779	GO:0005488	GO:0005509	GO:0005515	GO:0005543	GO:0005544	GO:0006950	GO:0006970	GO:0007275	GO:0008092	GO:0008150	GO:0008289	GO:0009266	GO:0009314	GO:0009408	GO:0009409	GO:0009414	GO:0009415	GO:0009416	GO:0009555	GO:0009628	GO:0009639	GO:0009651	GO:0009653	GO:0009826	GO:0009846	GO:0009856	GO:0009860	GO:0009932	GO:0009987	GO:0010035	GO:0016043	GO:0016049	GO:0022414	GO:0030154	GO:0032501	GO:0032502	GO:0032989	GO:0040007	GO:0042221	GO:0043167	GO:0043168	GO:0043169
BMK_Unigene_049838	GO:0003735	GO:0005840	GO:0006412
BMK_Unigene_049840	GO:0002128	GO:0002181	GO:0005737	GO:0008175
BMK_Unigene_049861	GO:0004842
BMK_Unigene_049878	GO:0003735	GO:0005840	GO:0006412
BMK_Unigene_049921	GO:0000387	GO:0003723	GO:0005681
BMK_Unigene_049924	GO:0003779	GO:0005515
BMK_Unigene_050099	GO:0000050	GO:0000053	GO:0004055	GO:0005524	GO:0005737	GO:0006526
BMK_Unigene_050128	GO:0003743	GO:0003924	GO:0005525
BMK_Unigene_050129	GO:0004190	GO:0006629
BMK_Unigene_050434	GO:0005524	GO:0016021	GO:0016887	GO:0042626
BMK_Unigene_050446	GO:0003779	GO:0005524	GO:0005737	GO:0005885	GO:0034314
BMK_Unigene_050486	GO:0004784	GO:0046872
BMK_Unigene_050537	GO:0055114
BMK_Unigene_050566	GO:0004725	GO:0008138
BMK_Unigene_050587	GO:0005515
BMK_Unigene_050588	GO:0005515	GO:0007165
BMK_Unigene_050626	GO:0003674	GO:0003824	GO:0005215	GO:0005524	GO:0005575	GO:0005622	GO:0005623	GO:0005737	GO:0005773	GO:0005774	GO:0006810	GO:0006869	GO:0008150	GO:0010876	GO:0015399	GO:0015405	GO:0016020	GO:0016021	GO:0016462	GO:0016787	GO:0016817	GO:0016818	GO:0016887	GO:0017111	GO:0022804	GO:0022857	GO:0031090	GO:0033036	GO:0042623	GO:0042626	GO:0043226	GO:0043227	GO:0043229	GO:0043231	GO:0043492	GO:0044422	GO:0044424	GO:0044437	GO:0044444	GO:0044446	GO:0044464	GO:0051179	GO:0051234	GO:0055085	GO:0071702	GO:0098588	GO:0098805
BMK_Unigene_050767	GO:0008194
BMK_Unigene_050773	GO:0003735	GO:0005840	GO:0006412	GO:0019843
BMK_Unigene_050778	GO:0008194
BMK_Unigene_050818	GO:0003674	GO:0003824	GO:0004672	GO:0004712	GO:0005524	GO:0005575	GO:0005622	GO:0005623	GO:0005737	GO:0006464	GO:0006468	GO:0006793	GO:0006796	GO:0006807	GO:0007154	GO:0007165	GO:0008150	GO:0008152	GO:0009987	GO:0016301	GO:0016310	GO:0016740	GO:0016772	GO:0016773	GO:0019538	GO:0023052	GO:0035556	GO:0036211	GO:0043170	GO:0043412	GO:0044237	GO:0044238	GO:0044260	GO:0044267	GO:0044424	GO:0044464	GO:0050789	GO:0050794	GO:0050896	GO:0051716	GO:0065007	GO:0071704	GO:0140096	GO:1901564
BMK_Unigene_050841	GO:0000049	GO:0004813	GO:0005524	GO:0005739	GO:0008270	GO:0070143
BMK_Unigene_050939	GO:0007165	GO:0043531
BMK_Unigene_050994	GO:0006606
BMK_Unigene_051016	GO:0016021	GO:0055085
BMK_Unigene_051043	GO:0016491
BMK_Unigene_051129	GO:0004114
BMK_Unigene_051158	GO:0005200	GO:0005525	GO:0005874	GO:0007017
BMK_Unigene_051249	GO:0005515
BMK_Unigene_051390	GO:0004672	GO:0004674	GO:0005524	GO:0006468
BMK_Unigene_051400	GO:0003735	GO:0006412	GO:0015934
BMK_Unigene_051403	GO:0008234
BMK_Unigene_051440	GO:0000062
BMK_Unigene_051490	GO:0008194
BMK_Unigene_051541	GO:0004802
BMK_Unigene_051562	GO:0003677	GO:0006357	GO:0046983
BMK_Unigene_051563	GO:0001101	GO:0001932	GO:0001934	GO:0003674	GO:0003735	GO:0005078	GO:0005198	GO:0005488	GO:0005515	GO:0005575	GO:0005622	GO:0005623	GO:0005634	GO:0005730	GO:0005737	GO:0005829	GO:0005840	GO:0005844	GO:0005886	GO:0006417	GO:0006950	GO:0006952	GO:0007275	GO:0008150	GO:0009605	GO:0009607	GO:0009620	GO:0009719	GO:0009725	GO:0009737	GO:0009791	GO:0009845	GO:0009889	GO:0009893	GO:0009966	GO:0009967	GO:0009987	GO:0010033	GO:0010468	GO:0010556	GO:0010562	GO:0010604	GO:0010608	GO:0010646	GO:0010647	GO:0016020	GO:0019220	GO:0019222	GO:0019899
BMK_Unigene_051601	GO:0004674	GO:0005524
BMK_Unigene_051674	GO:0004553	GO:0016021	GO:0030245
BMK_Unigene_051828	GO:0003735	GO:0005840	GO:0006412
BMK_Unigene_051892	GO:0005739	GO:0008137	GO:0016021	GO:0070469
BMK_Unigene_051898	GO:0000463	GO:0003735	GO:0022625
BMK_Unigene_051920	GO:0000184	GO:0004674	GO:0016310
BMK_Unigene_052006	GO:0003735	GO:0005840	GO:0006412
BMK_Unigene_052017	GO:0005576	GO:0006955	GO:0008009
BMK_Unigene_052031	GO:0016491
BMK_Unigene_052035	GO:0006120	GO:0008137	GO:0016021	GO:0031966	GO:0042773	GO:0055114	GO:0070469
BMK_Unigene_052041	GO:0004322	GO:0006826	GO:0006879	GO:0008199
BMK_Unigene_052047	GO:0003735	GO:0005840	GO:0006412
BMK_Unigene_052052	GO:0003735	GO:0005840	GO:0006412
BMK_Unigene_052057	GO:0016042	GO:0016787
BMK_Unigene_052071	GO:0006952
BMK_Unigene_052091	GO:0004129	GO:0005507	GO:0005743	GO:0016021	GO:0070469
BMK_Unigene_052098	GO:0002084	GO:0008474	GO:0098599
BMK_Unigene_052107	GO:0003723	GO:0003968	GO:0006351
BMK_Unigene_052134	GO:0004252	GO:0046872
BMK_Unigene_052140	GO:0003735	GO:0005840	GO:0006412	GO:0019843
BMK_Unigene_052141	GO:0005524
BMK_Unigene_052151	GO:0003674	GO:0003824	GO:0005575	GO:0005622	GO:0005623	GO:0005634	GO:0005737	GO:0005773	GO:0005774	GO:0005829	GO:0005886	GO:0005911	GO:0006081	GO:0006082	GO:0006089	GO:0008150	GO:0008152	GO:0009056	GO:0009058	GO:0009438	GO:0009506	GO:0009507	GO:0009532	GO:0009536	GO:0009570	GO:0009987	GO:0010035	GO:0010038	GO:0016020	GO:0016053	GO:0016829	GO:0016835	GO:0016836	GO:0019172	GO:0019249	GO:0019752	GO:0030054	GO:0031090	GO:0032787	GO:0036524	GO:0036529	GO:0042180	GO:0042182	GO:0042221	GO:0043226	GO:0043227	GO:0043229	GO:0043231	GO:0043436
BMK_Unigene_052153	GO:0001558	GO:0003674	GO:0003779	GO:0005488	GO:0005515	GO:0005575	GO:0005622	GO:0005623	GO:0005856	GO:0006996	GO:0007010	GO:0007015	GO:0008064	GO:0008092	GO:0008150	GO:0009605	GO:0009606	GO:0009628	GO:0009629	GO:0009630	GO:0009987	GO:0010639	GO:0010817	GO:0015629	GO:0016043	GO:0030029	GO:0030036	GO:0030832	GO:0030833	GO:0030834	GO:0030835	GO:0030837	GO:0031333	GO:0032271	GO:0032272	GO:0032432	GO:0032535	GO:0032879	GO:0032956	GO:0032970	GO:0033043	GO:0040008	GO:0043226	GO:0043228	GO:0043229	GO:0043232	GO:0043242	GO:0043244	GO:0043254
BMK_Unigene_052170	GO:0003824	GO:0004556	GO:0005975	GO:0043169	GO:0103025
BMK_Unigene_052178	GO:0008270
BMK_Unigene_052182	GO:0005840
BMK_Unigene_052183	GO:0003677	GO:0003700	GO:0005634
BMK_Unigene_052188	GO:0003924	GO:0008168
BMK_Unigene_052212	GO:0042302
BMK_Unigene_052278	GO:0004829	GO:0005524	GO:0005737	GO:0006435
BMK_Unigene_052415	GO:0004801	GO:0005737	GO:0005975	GO:0006098
BMK_Unigene_052513	GO:0003735	GO:0005840	GO:0006412
BMK_Unigene_052547	GO:0003735	GO:0005840	GO:0006412
BMK_Unigene_052602	GO:0003676	GO:0015074
BMK_Unigene_052622	GO:0003676	GO:0003690	GO:0003697	GO:0003723	GO:0005634	GO:0005739	GO:0009409	GO:0009414	GO:0009651	GO:0051252	GO:1900864	GO:1990904
BMK_Unigene_052661	GO:0008146
BMK_Unigene_052891	GO:0000160	GO:0000302	GO:0002218	GO:0002252	GO:0002253	GO:0002376	GO:0002682	GO:0002684	GO:0003674	GO:0003824	GO:0004553	GO:0005524	GO:0005575	GO:0005622	GO:0005623	GO:0005737	GO:0005829	GO:0005975	GO:0006950	GO:0006952	GO:0006955	GO:0006979	GO:0007154	GO:0007165	GO:0008150	GO:0008152	GO:0008422	GO:0009605	GO:0009607	GO:0009617	GO:0009682	GO:0009719	GO:0009723	GO:0009725	GO:0009755	GO:0009866	GO:0009873	GO:0009987	GO:0009991	GO:0010033	GO:0010035	GO:0010038	GO:0010039	GO:0015926	GO:0016787	GO:0016798	GO:0019748	GO:0023052	GO:0031347
BMK_Unigene_052934	GO:0005618	GO:0006073	GO:0016762	GO:0048046
BMK_Unigene_052943	GO:0006952	GO:0043531
BMK_Unigene_053066	GO:0000003	GO:0000027	GO:0003006	GO:0003674	GO:0003676	GO:0003723	GO:0003729	GO:0003735	GO:0005198	GO:0005488	GO:0005575	GO:0005622	GO:0005623	GO:0005634	GO:0005730	GO:0005737	GO:0005829	GO:0005840	GO:0005886	GO:0006412	GO:0006518	GO:0006807	GO:0006996	GO:0007154	GO:0007165	GO:0007275	GO:0008150	GO:0008152	GO:0009058	GO:0009059	GO:0009507	GO:0009536	GO:0009719	GO:0009725	GO:0009733	GO:0009734	GO:0009755	GO:0009791	GO:0009908	GO:0009987	GO:0010033	GO:0010467	GO:0015934	GO:0016020	GO:0016043	GO:0019538	GO:0022414	GO:0022607	GO:0022613
BMK_Unigene_053101	GO:0043531
BMK_Unigene_053123	GO:0004563	GO:0005975
BMK_Unigene_053254	GO:0003779
BMK_Unigene_053258	GO:0000003	GO:0003006	GO:0006508	GO:0006511	GO:0006807	GO:0007275	GO:0008150	GO:0008152	GO:0009056	GO:0009057	GO:0009790	GO:0009791	GO:0009793	GO:0009987	GO:0010154	GO:0019538	GO:0019941	GO:0022414	GO:0030163	GO:0032501	GO:0032502	GO:0043170	GO:0043632	GO:0044237	GO:0044238	GO:0044248	GO:0044257	GO:0044260	GO:0044265	GO:0044267	GO:0048316	GO:0048608	GO:0048731	GO:0048856	GO:0051603	GO:0061458	GO:0071704	GO:1901564	GO:1901565	GO:1901575
BMK_Unigene_053310	GO:0000902	GO:0000904	GO:0003674	GO:0003779	GO:0005488	GO:0005515	GO:0005575	GO:0005622	GO:0005623	GO:0005737	GO:0005768	GO:0005856	GO:0005885	GO:0006928	GO:0006996	GO:0007010	GO:0007015	GO:0007163	GO:0007275	GO:0007399	GO:0007417	GO:0007420	GO:0008064	GO:0008092	GO:0008150	GO:0008154	GO:0009653	GO:0009825	GO:0009888	GO:0009987	GO:0010026	GO:0010090	GO:0010638	GO:0012505	GO:0014812	GO:0014909	GO:0015629	GO:0016043	GO:0016049	GO:0016477	GO:0021761	GO:0021769	GO:0022607	GO:0030011	GO:0030029	GO:0030030	GO:0030036	GO:0030041	GO:0030154
BMK_Unigene_053354	GO:0006629
BMK_Unigene_053378	GO:0005753
BMK_Unigene_053485	GO:0008194
BMK_Unigene_053532	GO:0010039	GO:0034756	GO:0046983
BMK_Unigene_053535	GO:0005509
BMK_Unigene_053573	GO:0003735	GO:0005840	GO:0006412
BMK_Unigene_053652	GO:0046872
BMK_Unigene_053784	GO:0003674	GO:0003735	GO:0005198	GO:0005575	GO:0005622	GO:0005623	GO:0005737	GO:0005840	GO:0006412	GO:0006518	GO:0006807	GO:0008150	GO:0008152	GO:0009058	GO:0009059	GO:0009507	GO:0009536	GO:0009987	GO:0010467	GO:0019538	GO:0032991	GO:0034641	GO:0034645	GO:0043043	GO:0043170	GO:0043226	GO:0043227	GO:0043228	GO:0043229	GO:0043231	GO:0043232	GO:0043603	GO:0043604	GO:0044237	GO:0044238	GO:0044249	GO:0044260	GO:0044267	GO:0044271	GO:0044424	GO:0044444	GO:0044464	GO:0071704	GO:1901564	GO:1901566	GO:1901576	GO:1990904
BMK_Unigene_053857	GO:0008234
BMK_Unigene_053864	GO:0004553	GO:0005975
BMK_Unigene_053877	GO:0005575	GO:0005623	GO:0005886	GO:0006950	GO:0006952	GO:0007154	GO:0007165	GO:0008150	GO:0009987	GO:0016020	GO:0023052	GO:0044464	GO:0050789	GO:0050794	GO:0050896	GO:0051716	GO:0065007	GO:0071944
BMK_Unigene_053888	GO:0003779
BMK_Unigene_053911	GO:0003735	GO:0005840	GO:0006412
BMK_Unigene_054031	GO:0005764	GO:0006629	GO:0006665
BMK_Unigene_054061	GO:0005575	GO:0005622	GO:0005623	GO:0005634	GO:0005737	GO:0005768	GO:0005773	GO:0005774	GO:0005794	GO:0005802	GO:0006873	GO:0006875	GO:0006878	GO:0006882	GO:0008150	GO:0009987	GO:0012505	GO:0016020	GO:0016021	GO:0019725	GO:0030003	GO:0031090	GO:0031224	GO:0031410	GO:0031982	GO:0031984	GO:0042592	GO:0043226	GO:0043227	GO:0043229	GO:0043231	GO:0044422	GO:0044424	GO:0044425	GO:0044431	GO:0044437	GO:0044444	GO:0044446	GO:0044464	GO:0046916	GO:0048878	GO:0050801	GO:0055065	GO:0055069	GO:0055070	GO:0055076	GO:0055080	GO:0055082	GO:0065007
BMK_Unigene_054065	GO:0005524	GO:0006457	GO:0051082
BMK_Unigene_054231	GO:0006952
BMK_Unigene_054268	GO:0005524	GO:0005886	GO:0008553	GO:0016021	GO:0120029
BMK_Unigene_054289	GO:0003735	GO:0005840	GO:0006412
BMK_Unigene_054321	GO:0004174	GO:0046872	GO:0051539
BMK_Unigene_054354	GO:0000164	GO:0004722	GO:0046872	GO:0072357
BMK_Unigene_054372	GO:0005634
BMK_Unigene_054432	GO:0000977	GO:0003700	GO:0005634	GO:0045944	GO:0046983
BMK_Unigene_054549	GO:0006596	GO:0016740
BMK_Unigene_054564	GO:0016042
BMK_Unigene_054576	GO:0005385	GO:0016021
BMK_Unigene_054710	GO:0003735	GO:0005840	GO:0006412
BMK_Unigene_054721	GO:0003723	GO:0003735	GO:0006412	GO:0022625
BMK_Unigene_054723	GO:0003735	GO:0005840	GO:0006412	GO:0019843	GO:0046872
BMK_Unigene_054867	GO:0008194
BMK_Unigene_054885	GO:0003735	GO:0005840	GO:0006412
BMK_Unigene_054918	GO:0005515	GO:0005575	GO:0005622	GO:0005623	GO:0005737	GO:0005773	GO:0006508	GO:0006511	GO:0006807	GO:0008150	GO:0008152	GO:0009056	GO:0009057	GO:0009987	GO:0019538	GO:0019941	GO:0030163	GO:0043170	GO:0043226	GO:0043227	GO:0043229	GO:0043231	GO:0043632	GO:0044237	GO:0044238	GO:0044248	GO:0044257	GO:0044260	GO:0044265	GO:0044267	GO:0044424	GO:0044444	GO:0044464	GO:0051603	GO:0071704	GO:1901564	GO:1901565	GO:1901575
BMK_Unigene_055031	GO:0046872	GO:0050590
BMK_Unigene_055033	GO:0016021
BMK_Unigene_055181	GO:0005509	GO:0019722
BMK_Unigene_055253	GO:0000003	GO:0000146	GO:0000166	GO:0000331	GO:0000902	GO:0000904	GO:0003006	GO:0003674	GO:0003774	GO:0003779	GO:0003824	GO:0005488	GO:0005515	GO:0005524	GO:0005575	GO:0005622	GO:0005623	GO:0005737	GO:0005773	GO:0005856	GO:0005911	GO:0006928	GO:0007275	GO:0008092	GO:0008144	GO:0008150	GO:0009506	GO:0009653	GO:0009791	GO:0009826	GO:0009888	GO:0009908	GO:0009932	GO:0009987	GO:0010015	GO:0010026	GO:0010053	GO:0010054	GO:0010090	GO:0010091	GO:0012505	GO:0015629	GO:0016043	GO:0016049	GO:0016459	GO:0016462	GO:0016787	GO:0016817	GO:0016818
BMK_Unigene_055295	GO:0004888	GO:0007166	GO:0016020
BMK_Unigene_055331	GO:0016021
BMK_Unigene_055362	GO:0016021
BMK_Unigene_055428	GO:0003746	GO:0005525
BMK_Unigene_055462	GO:0005524	GO:0005886	GO:0008553	GO:0016021	GO:0120029
BMK_Unigene_055547	GO:0004674	GO:0005524	GO:0016021
BMK_Unigene_055615	GO:0005515
BMK_Unigene_055792	GO:0003735	GO:0005840	GO:0006412
BMK_Unigene_055918	GO:0010088
BMK_Unigene_055924	GO:0005634	GO:0005694	GO:0008270	GO:0018024
BMK_Unigene_055929	GO:0000381	GO:0000932	GO:0003676	GO:0003723	GO:0005575	GO:0005622	GO:0005623	GO:0005634	GO:0005737	GO:0006397	GO:0006417	GO:0007275	GO:0008150	GO:0009791	GO:0009845	GO:0009889	GO:0010468	GO:0010556	GO:0010608	GO:0019219	GO:0019222	GO:0031323	GO:0031326	GO:0032268	GO:0032501	GO:0032502	GO:0032991	GO:0034248	GO:0035770	GO:0036464	GO:0043226	GO:0043227	GO:0043228	GO:0043229	GO:0043231	GO:0043232	GO:0043484	GO:0044424	GO:0044444	GO:0044464	GO:0048024	GO:0048856	GO:0050684	GO:0050789	GO:0050794	GO:0051171	GO:0051246	GO:0051252	GO:0060255
BMK_Unigene_055968	GO:0043531
BMK_Unigene_056063	GO:0003924	GO:0005525
BMK_Unigene_056163	GO:0003677	GO:0005634	GO:0006355
BMK_Unigene_056172	GO:0007165
BMK_Unigene_056199	GO:0004553	GO:0005975	GO:0016762
BMK_Unigene_056238	GO:0003735	GO:0005840	GO:0006412
BMK_Unigene_056414	GO:0003924	GO:0005525
BMK_Unigene_056427	GO:0016021
BMK_Unigene_056429	GO:0003735	GO:0005840	GO:0006412	GO:0008097
BMK_Unigene_056471	GO:0046983
BMK_Unigene_056522	GO:0003735	GO:0005840	GO:0006412
BMK_Unigene_056533	GO:0004497	GO:0005506	GO:0016021	GO:0016705	GO:0020037
BMK_Unigene_056540	GO:0000003	GO:0000146	GO:0000166	GO:0000331	GO:0000902	GO:0000904	GO:0003006	GO:0003674	GO:0003774	GO:0003779	GO:0003824	GO:0005488	GO:0005515	GO:0005524	GO:0005575	GO:0005622	GO:0005623	GO:0005737	GO:0005773	GO:0005856	GO:0006928	GO:0006996	GO:0007010	GO:0007015	GO:0008092	GO:0008144	GO:0008150	GO:0009653	GO:0009826	GO:0009856	GO:0009860	GO:0009932	GO:0009987	GO:0015629	GO:0016043	GO:0016049	GO:0016459	GO:0016462	GO:0016787	GO:0016817	GO:0016818	GO:0016887	GO:0017076	GO:0017111	GO:0022414	GO:0030029	GO:0030036	GO:0030048	GO:0030154
BMK_Unigene_056541	GO:0000146	GO:0000166	GO:0000278	GO:0000281	GO:0000302	GO:0000910	GO:0001891	GO:0001931	GO:0003674	GO:0003774	GO:0003779	GO:0003824	GO:0005488	GO:0005515	GO:0005524	GO:0005575	GO:0005622	GO:0005623	GO:0005737	GO:0005768	GO:0005783	GO:0005826	GO:0005829	GO:0005856	GO:0005886	GO:0005911	GO:0005938	GO:0006928	GO:0006935	GO:0006950	GO:0006970	GO:0006971	GO:0006979	GO:0006996	GO:0007010	GO:0007015	GO:0007033	GO:0007049	GO:0007154	GO:0008064	GO:0008092	GO:0008104	GO:0008144	GO:0008150	GO:0008360	GO:0009267	GO:0009506	GO:0009524	GO:0009581
BMK_Unigene_056551	GO:0003924	GO:0005525	GO:0005768	GO:0006886	GO:0012505	GO:0032482
BMK_Unigene_056574	GO:0003676
BMK_Unigene_056700	GO:0003676	GO:0015074
BMK_Unigene_056863	GO:0003735	GO:0005840	GO:0006412
BMK_Unigene_056940	GO:0016021
BMK_Unigene_056982	GO:0000302	GO:0001101	GO:0001525	GO:0001568	GO:0001659	GO:0001667	GO:0001678	GO:0001885	GO:0001944	GO:0002064	GO:0002682	GO:0002683	GO:0002861	GO:0002862	GO:0003008	GO:0003013	GO:0003015	GO:0003018	GO:0003158	GO:0003674	GO:0003824	GO:0004601	GO:0004602	GO:0005488	GO:0005515	GO:0005575	GO:0005622	GO:0005623	GO:0005634	GO:0005737	GO:0005739	GO:0005759	GO:0005829	GO:0006082	GO:0006091	GO:0006139	GO:0006163	GO:0006195	GO:0006464	GO:0006518	GO:0006575	GO:0006629	GO:0006631	GO:0006638	GO:0006639	GO:0006641	GO:0006690	GO:0006725	GO:0006749
BMK_Unigene_057074	GO:0005515
BMK_Unigene_057085	GO:0005575	GO:0005622	GO:0005623	GO:0005737	GO:0005886	GO:0005887	GO:0005938	GO:0007154	GO:0007165	GO:0008150	GO:0009719	GO:0009725	GO:0009733	GO:0009734	GO:0009755	GO:0009987	GO:0010033	GO:0016020	GO:0016021	GO:0022857	GO:0023052	GO:0031224	GO:0031226	GO:0032870	GO:0042221	GO:0044424	GO:0044425	GO:0044444	GO:0044459	GO:0044464	GO:0050789	GO:0050794	GO:0050896	GO:0051716	GO:0065007	GO:0070887	GO:0071310	GO:0071365	GO:0071495	GO:0071944	GO:0099568
BMK_Unigene_057094	GO:0005506	GO:0009055	GO:0051537	GO:0071949
BMK_Unigene_057123	GO:0005524	GO:0016307
BMK_Unigene_057133	GO:0004129	GO:0005739	GO:0016021	GO:0019646
BMK_Unigene_057144	GO:0005575	GO:0005622	GO:0005623	GO:0005737	GO:0005768	GO:0005770	GO:0006810	GO:0006811	GO:0006812	GO:0006885	GO:0008150	GO:0012505	GO:0015672	GO:0031410	GO:0031982	GO:0042592	GO:0043226	GO:0043227	GO:0043229	GO:0044424	GO:0044444	GO:0044464	GO:0048878	GO:0050801	GO:0051179	GO:0051234	GO:0055067	GO:0055080	GO:0065007	GO:0065008	GO:0097708	GO:0098771
BMK_Unigene_057359	GO:0005249	GO:0016021
BMK_Unigene_057426	GO:0003676	GO:0008270	GO:0015074
BMK_Unigene_057441	GO:0003676	GO:0004523
BMK_Unigene_057476	GO:0000184	GO:0000956	GO:0003674	GO:0003676	GO:0003677	GO:0003824	GO:0004672	GO:0004674	GO:0005488	GO:0005524	GO:0005575	GO:0005622	GO:0005623	GO:0005634	GO:0005654	GO:0005737	GO:0005829	GO:0006139	GO:0006259	GO:0006281	GO:0006401	GO:0006402	GO:0006403	GO:0006405	GO:0006406	GO:0006464	GO:0006468	GO:0006611	GO:0006629	GO:0006644	GO:0006650	GO:0006725	GO:0006793	GO:0006796	GO:0006807	GO:0006810	GO:0006886	GO:0006913	GO:0006950	GO:0006974	GO:0008104	GO:0008150	GO:0008152	GO:0009056	GO:0009057	GO:0009892	GO:0009987	GO:0010467	GO:0010468
BMK_Unigene_057492	GO:0003677	GO:0005634
BMK_Unigene_057564	GO:0015297	GO:0016021	GO:0042910
BMK_Unigene_057614	GO:0016747
BMK_Unigene_057639	GO:0035091
BMK_Unigene_057655	GO:0006952
BMK_Unigene_057750	GO:0016021
BMK_Unigene_057867	GO:0008270	GO:0016491
BMK_Unigene_057877	GO:0003676	GO:0004386	GO:0005524
BMK_Unigene_057948	GO:0003779
BMK_Unigene_057950	GO:0003735	GO:0005840	GO:0006412
BMK_Unigene_058000	GO:0016021
BMK_Unigene_058026	GO:0003755	GO:0006457
BMK_Unigene_058042	GO:0016021
BMK_Unigene_058102	GO:0003723	GO:0003735	GO:0006412	GO:0015934
BMK_Unigene_058119	GO:0004672	GO:0005524	GO:0030247
BMK_Unigene_058162	GO:0000166	GO:0002376	GO:0003674	GO:0005488	GO:0005575	GO:0005623	GO:0005886	GO:0005911	GO:0006950	GO:0006952	GO:0006955	GO:0007154	GO:0007165	GO:0008150	GO:0008219	GO:0009506	GO:0009626	GO:0009987	GO:0012501	GO:0016020	GO:0019897	GO:0019898	GO:0023052	GO:0030054	GO:0033554	GO:0034050	GO:0036094	GO:0043531	GO:0044425	GO:0044459	GO:0044464	GO:0045087	GO:0050789	GO:0050794	GO:0050896	GO:0051716	GO:0055044	GO:0065007	GO:0071944	GO:0097159	GO:1901265	GO:1901363
BMK_Unigene_058179	GO:0016021
BMK_Unigene_058183	GO:0004576	GO:0006486	GO:0016021
BMK_Unigene_058188	GO:0043531
BMK_Unigene_058194	GO:0000003	GO:0000302	GO:0000303	GO:0000305	GO:0001101	GO:0003006	GO:0003674	GO:0003824	GO:0004784	GO:0005488	GO:0005507	GO:0005575	GO:0005622	GO:0005623	GO:0005737	GO:0005739	GO:0005759	GO:0006801	GO:0006950	GO:0006952	GO:0006970	GO:0006979	GO:0007275	GO:0008150	GO:0008152	GO:0009410	GO:0009605	GO:0009607	GO:0009617	GO:0009628	GO:0009635	GO:0009636	GO:0009651	GO:0009719	GO:0009725	GO:0009737	GO:0009790	GO:0009791	GO:0009793	GO:0009838	GO:0009908	GO:0009987	GO:0010033	GO:0010035	GO:0010038	GO:0010043	GO:0010154	GO:0010227	GO:0016043
BMK_Unigene_058310	GO:0006511
BMK_Unigene_058361	GO:0005198	GO:0006511	GO:0008541	GO:0043248
BMK_Unigene_058365	GO:0006511	GO:0008540
BMK_Unigene_058386	GO:0005975	GO:0008422
BMK_Unigene_058434	GO:0005575	GO:0005622	GO:0005623	GO:0005813	GO:0005815	GO:0005856	GO:0015630	GO:0043226	GO:0043228	GO:0043229	GO:0043232	GO:0044422	GO:0044424	GO:0044430	GO:0044446	GO:0044464
BMK_Unigene_058513	GO:0005885	GO:0015629	GO:0030833	GO:0034314
BMK_Unigene_058578	GO:0046872	GO:0051213
BMK_Unigene_058590	GO:0016021
BMK_Unigene_058601	GO:0016021
BMK_Unigene_058619	GO:0004252	GO:0008236	GO:0046872
BMK_Unigene_058751	GO:0016021
BMK_Unigene_058759	GO:0003674	GO:0005488	GO:0005509	GO:0005575	GO:0005623	GO:0005886	GO:0006950	GO:0008150	GO:0009611	GO:0016020	GO:0043167	GO:0043169	GO:0044464	GO:0046872	GO:0050896	GO:0071944
BMK_Unigene_058772	GO:0000786	GO:0003677	GO:0005634	GO:0046982
BMK_Unigene_058790	GO:0008168	GO:0016491	GO:0032259
BMK_Unigene_058817	GO:0003735	GO:0005840	GO:0006412
BMK_Unigene_058889	GO:0006511	GO:0016874
BMK_Unigene_058898	GO:0005840
BMK_Unigene_058976	GO:0046872
BMK_Unigene_059062	GO:0003723	GO:0043484
BMK_Unigene_059077	GO:0007165	GO:0016787	GO:0043531
BMK_Unigene_059093	GO:0016491	GO:0046872
BMK_Unigene_059136	GO:0003735	GO:0006412	GO:0015934
BMK_Unigene_059140	GO:0003735	GO:0005576	GO:0005618	GO:0005840	GO:0006412	GO:0009664	GO:0016020
BMK_Unigene_059165	GO:0004674	GO:0005524	GO:0016021	GO:0048544
BMK_Unigene_059169	GO:0003674	GO:0003676	GO:0003723	GO:0003729	GO:0003735	GO:0005198	GO:0005488	GO:0005575	GO:0005622	GO:0005623	GO:0005634	GO:0005730	GO:0005737	GO:0005773	GO:0005774	GO:0005783	GO:0005829	GO:0005840	GO:0005844	GO:0005911	GO:0006412	GO:0006518	GO:0006807	GO:0008150	GO:0008152	GO:0009058	GO:0009059	GO:0009506	GO:0009507	GO:0009536	GO:0009987	GO:0010467	GO:0012505	GO:0015934	GO:0016020	GO:0019538	GO:0022613	GO:0022625	GO:0022626	GO:0030054	GO:0031090	GO:0031974	GO:0031981	GO:0032991	GO:0034641	GO:0034645	GO:0042254	GO:0042273	GO:0042788
BMK_Unigene_059249	GO:0008496	GO:0016021	GO:0016052
BMK_Unigene_059266	GO:0030246
BMK_Unigene_059273	GO:0004222	GO:0005524	GO:0008270	GO:0016021
BMK_Unigene_059301	GO:0003723	GO:0003735	GO:0006412	GO:0015934
BMK_Unigene_059332	GO:0003674	GO:0003700	GO:0005575	GO:0005622	GO:0005623	GO:0005634	GO:0006355	GO:0008150	GO:0009889	GO:0009987	GO:0010033	GO:0010035	GO:0010038	GO:0010045	GO:0010200	GO:0010243	GO:0010468	GO:0010556	GO:0019219	GO:0019222	GO:0031323	GO:0031326	GO:0042221	GO:0042493	GO:0043226	GO:0043227	GO:0043229	GO:0043231	GO:0044424	GO:0044464	GO:0050789	GO:0050793	GO:0050794	GO:0050896	GO:0051171	GO:0051239	GO:0051252	GO:0051716	GO:0060255	GO:0065007	GO:0070887	GO:0071241	GO:0071248	GO:0071289	GO:0080090	GO:0140110	GO:1901698	GO:1901700	GO:1903506
BMK_Unigene_059372	GO:0016866	GO:0071669
BMK_Unigene_059465	GO:0003735	GO:0005840	GO:0006412
BMK_Unigene_059506	GO:0000302	GO:0005575	GO:0005622	GO:0005623	GO:0005737	GO:0006950	GO:0006979	GO:0008150	GO:0009266	GO:0009408	GO:0009507	GO:0009536	GO:0009628	GO:0009636	GO:0010033	GO:0010035	GO:0010038	GO:0042221	GO:0042493	GO:0042542	GO:0043226	GO:0043227	GO:0043229	GO:0043231	GO:0044424	GO:0044444	GO:0044464	GO:0045471	GO:0046677	GO:0046685	GO:0046686	GO:0046688	GO:0050896	GO:0097305	GO:1901700
BMK_Unigene_059577	GO:0003735	GO:0006412	GO:0015934
BMK_Unigene_059630	GO:0003723	GO:0003735	GO:0006412	GO:0015935
BMK_Unigene_059659	GO:0005783	GO:0005886	GO:0009734	GO:0009926	GO:0010252	GO:0010315	GO:0010329	GO:0016021
BMK_Unigene_059691	GO:0003735	GO:0005840	GO:0006414
BMK_Unigene_059745	GO:0003723	GO:0003735	GO:0006412	GO:0022625
BMK_Unigene_059838	GO:0003723	GO:0003724	GO:0003968	GO:0005198	GO:0006351	GO:0019028
BMK_Unigene_059842	GO:0005575	GO:0005622	GO:0005623	GO:0005737	GO:0006952	GO:0009507	GO:0009536	GO:0043226	GO:0043227	GO:0043229	GO:0043231	GO:0044424	GO:0044444	GO:0044464
BMK_Unigene_059885	GO:0016021
BMK_Unigene_059993	GO:0005576	GO:0005618	GO:0009664	GO:0016020
BMK_Unigene_059998	GO:0004497	GO:0005506	GO:0016021	GO:0016705	GO:0020037
BMK_Unigene_060000	GO:0003723	GO:0003735	GO:0005634	GO:0006412	GO:0022627
BMK_Unigene_060025	GO:0007165	GO:0043531
BMK_Unigene_060047	GO:0004497	GO:0005506	GO:0016705	GO:0020037
BMK_Unigene_060051	GO:0005515
BMK_Unigene_060067	GO:0003735	GO:0005840	GO:0006414
BMK_Unigene_060084	GO:0006487	GO:0008250	GO:0016021
BMK_Unigene_060087	GO:0016021
BMK_Unigene_060165	GO:0016021
BMK_Unigene_060186	GO:0016021	GO:0022857
BMK_Unigene_060207	GO:0000221	GO:0000325	GO:0003674	GO:0003824	GO:0005215	GO:0005575	GO:0005622	GO:0005623	GO:0005737	GO:0005773	GO:0005774	GO:0005794	GO:0005886	GO:0006810	GO:0006811	GO:0006812	GO:0006873	GO:0006885	GO:0007035	GO:0008150	GO:0008324	GO:0009507	GO:0009536	GO:0009987	GO:0012505	GO:0015075	GO:0015077	GO:0015078	GO:0015318	GO:0015399	GO:0015405	GO:0015672	GO:0016020	GO:0016462	GO:0016469	GO:0016471	GO:0016787	GO:0016817	GO:0016818	GO:0016887	GO:0017111	GO:0019725	GO:0019829	GO:0022804	GO:0022853	GO:0022857	GO:0022890	GO:0030003	GO:0030004
BMK_Unigene_060211	GO:0003735	GO:0005840	GO:0006412
BMK_Unigene_060235	GO:0005515	GO:0007165	GO:0043531
BMK_Unigene_060292	GO:0005634	GO:0006355	GO:0043565
BMK_Unigene_060338	GO:0003824	GO:0050662
BMK_Unigene_060413	GO:0016021
BMK_Unigene_060489	GO:0005509
BMK_Unigene_060511	GO:0003735	GO:0005840	GO:0006412
BMK_Unigene_060516	GO:0007062	GO:0008278
BMK_Unigene_060537	GO:0003735	GO:0005840	GO:0006412
BMK_Unigene_060598	GO:0003677	GO:0005634
BMK_Unigene_060605	GO:0003677	GO:0005634	GO:0006355
BMK_Unigene_060664	GO:0004129	GO:0005739	GO:0016021	GO:0019646
BMK_Unigene_060689	GO:0003674	GO:0003756	GO:0003824	GO:0004791	GO:0005575	GO:0005622	GO:0005623	GO:0005737	GO:0005829	GO:0006950	GO:0006979	GO:0008150	GO:0008152	GO:0009636	GO:0009987	GO:0015035	GO:0015036	GO:0016209	GO:0016491	GO:0016651	GO:0016667	GO:0016668	GO:0016671	GO:0016853	GO:0016860	GO:0016864	GO:0019725	GO:0033554	GO:0034599	GO:0042221	GO:0042592	GO:0044424	GO:0044444	GO:0044464	GO:0045454	GO:0047134	GO:0050789	GO:0050794	GO:0050896	GO:0051716	GO:0055114	GO:0065007	GO:0065008	GO:0070887	GO:0097237	GO:0098754	GO:0098869	GO:0140096	GO:1990748
BMK_Unigene_060728	GO:0016021
BMK_Unigene_060729	GO:0000302	GO:0006457	GO:0009408	GO:0009651	GO:0042542	GO:0043621	GO:0051082	GO:0051259
BMK_Unigene_060765	GO:0006457	GO:0051082
BMK_Unigene_060770	GO:0003700
BMK_Unigene_060771	GO:0003700
BMK_Unigene_060784	GO:0003674	GO:0003676	GO:0003700	GO:0003723	GO:0003824	GO:0004518	GO:0004519	GO:0004672	GO:0004674	GO:0005488	GO:0005575	GO:0005622	GO:0005623	GO:0005634	GO:0005737	GO:0005829	GO:0006139	GO:0006355	GO:0006464	GO:0006468	GO:0006725	GO:0006793	GO:0006796	GO:0006807	GO:0007154	GO:0007165	GO:0007275	GO:0008150	GO:0008152	GO:0009451	GO:0009889	GO:0009987	GO:0010468	GO:0010556	GO:0016070	GO:0016301	GO:0016310	GO:0016740	GO:0016772	GO:0016773	GO:0016787	GO:0016788	GO:0019219	GO:0019222	GO:0019538	GO:0022622	GO:0023052	GO:0031323	GO:0031326
BMK_Unigene_060786	GO:0005764	GO:0006629	GO:0006665
BMK_Unigene_060799	GO:0003924	GO:0005525	GO:0005737	GO:0005783	GO:0005789	GO:0007029	GO:0016021	GO:0016320
BMK_Unigene_060882	GO:0003735	GO:0005840	GO:0006412	GO:0019843
BMK_Unigene_060912	GO:0003735	GO:0005840	GO:0006412
BMK_Unigene_060917	GO:0003735	GO:0006412	GO:0015934
BMK_Unigene_061096	GO:0016021
BMK_Unigene_061176	GO:0005576	GO:0006955	GO:0008009
BMK_Unigene_061192	GO:0003735	GO:0005840	GO:0006412
BMK_Unigene_061242	GO:0005509	GO:0016021
BMK_Unigene_061302	GO:0000786	GO:0003677	GO:0005634	GO:0046982
BMK_Unigene_061306	GO:0004129	GO:0005743	GO:0006119	GO:0009060	GO:0016021	GO:0020037	GO:0045277	GO:0046872
BMK_Unigene_061427	GO:0003735	GO:0005840	GO:0006412
BMK_Unigene_061445	GO:0008299	GO:0016740
BMK_Unigene_061451	GO:0000045	GO:0000422	GO:0006501	GO:0034045	GO:0034274	GO:0044804
BMK_Unigene_061469	GO:0004497	GO:0005506	GO:0016021	GO:0016705	GO:0020037
BMK_Unigene_061520	GO:0008168	GO:0016021	GO:0032259
BMK_Unigene_061536	GO:0008146
BMK_Unigene_061604	GO:0000166	GO:0003674	GO:0003824	GO:0005488	GO:0005575	GO:0005622	GO:0005623	GO:0005737	GO:0005739	GO:0006518	GO:0006575	GO:0006749	GO:0006750	GO:0006790	GO:0006807	GO:0006873	GO:0006950	GO:0008150	GO:0008152	GO:0009058	GO:0009636	GO:0009987	GO:0010035	GO:0010038	GO:0016491	GO:0016667	GO:0016672	GO:0019184	GO:0019222	GO:0019725	GO:0019748	GO:0030002	GO:0030320	GO:0031323	GO:0034641	GO:0036094	GO:0042221	GO:0042398	GO:0042592	GO:0042762	GO:0043043	GO:0043167	GO:0043168	GO:0043226	GO:0043227	GO:0043229	GO:0043231	GO:0043603	GO:0043604
BMK_Unigene_061638	GO:0004252	GO:0006508
BMK_Unigene_061655	GO:0006751	GO:0016021	GO:0036374
BMK_Unigene_061665	GO:0005096	GO:0046872
BMK_Unigene_061677	GO:0003677	GO:0046983
BMK_Unigene_061711	GO:0005524	GO:0006457	GO:0051082
BMK_Unigene_061738	GO:0005575	GO:0005622	GO:0005623	GO:0005634	GO:0005737	GO:0008150	GO:0009314	GO:0009416	GO:0009605	GO:0009606	GO:0009628	GO:0009637	GO:0009638	GO:0043226	GO:0043227	GO:0043229	GO:0043231	GO:0044424	GO:0044464	GO:0050896
BMK_Unigene_061783	GO:0016021
BMK_Unigene_061827	GO:0005575	GO:0005623	GO:0005886	GO:0006950	GO:0006952	GO:0007154	GO:0007165	GO:0008150	GO:0009987	GO:0016020	GO:0023052	GO:0044464	GO:0050789	GO:0050794	GO:0050896	GO:0051716	GO:0065007	GO:0071944
BMK_Unigene_061863	GO:0006486
BMK_Unigene_061893	GO:0016021
BMK_Unigene_061906	GO:0005509
BMK_Unigene_061917	GO:0004089	GO:0008270	GO:0009440	GO:0015976
BMK_Unigene_061945	GO:0003735	GO:0005840	GO:0006412	GO:0019843
BMK_Unigene_061960	GO:0003677	GO:0007165	GO:0043531
BMK_Unigene_061999	GO:0005575	GO:0005622	GO:0005623	GO:0005634	GO:0005737	GO:0007275	GO:0008150	GO:0009314	GO:0009416	GO:0009628	GO:0009639	GO:0009640	GO:0009704	GO:0009791	GO:0032501	GO:0032502	GO:0036377	GO:0043226	GO:0043227	GO:0043229	GO:0043231	GO:0044403	GO:0044419	GO:0044424	GO:0044464	GO:0048856	GO:0050896	GO:0051704	GO:0080167
BMK_Unigene_062115	GO:0005506	GO:0016021	GO:0020037	GO:0102557
BMK_Unigene_062129	GO:0005737	GO:0015629	GO:0030042	GO:0051015
BMK_Unigene_062132	GO:0046872	GO:0051213
BMK_Unigene_062171	GO:0005737	GO:0005956	GO:0019887
BMK_Unigene_062183	GO:0003735	GO:0005840	GO:0006414
BMK_Unigene_062186	GO:0003735	GO:0005840	GO:0006412	GO:0009507	GO:0019843
BMK_Unigene_062239	GO:0003735	GO:0005840	GO:0006412
BMK_Unigene_062245	GO:0016021
BMK_Unigene_062260	GO:0000271	GO:0000278	GO:0000281	GO:0000910	GO:0003674	GO:0003824	GO:0005575	GO:0005622	GO:0005623	GO:0005737	GO:0005794	GO:0005886	GO:0005975	GO:0005976	GO:0006073	GO:0007049	GO:0008150	GO:0008152	GO:0009058	GO:0009059	GO:0009250	GO:0009832	GO:0009833	GO:0009987	GO:0012505	GO:0016020	GO:0016021	GO:0016051	GO:0016740	GO:0016757	GO:0016758	GO:0016759	GO:0016760	GO:0022402	GO:0030243	GO:0030244	GO:0033692	GO:0034637	GO:0034645	GO:0042546	GO:0043170	GO:0043226	GO:0043227	GO:0043229	GO:0043231	GO:0044042	GO:0044085	GO:0044237	GO:0044238
BMK_Unigene_062268	GO:0008194
BMK_Unigene_062273	GO:0005575	GO:0005623	GO:0005886	GO:0006950	GO:0006952	GO:0007154	GO:0007165	GO:0008150	GO:0009987	GO:0016020	GO:0023052	GO:0043531	GO:0044464	GO:0050789	GO:0050794	GO:0050896	GO:0051716	GO:0065007	GO:0071944
BMK_Unigene_062322	GO:0005882
BMK_Unigene_062395	GO:0004322	GO:0006826	GO:0006879	GO:0008199
BMK_Unigene_062415	GO:0005975	GO:0052692
BMK_Unigene_062449	GO:0016787
BMK_Unigene_062477	GO:0008380	GO:0035145
BMK_Unigene_062494	GO:0005509
BMK_Unigene_062607	GO:0004932	GO:0007186	GO:0016021
BMK_Unigene_062611	GO:0008168	GO:0016021	GO:0032259
BMK_Unigene_062627	GO:0003677	GO:0005634
BMK_Unigene_062664	GO:0005576	GO:0006952
BMK_Unigene_062684	GO:0004722
BMK_Unigene_062763	GO:0004735	GO:0006561	GO:0016021
BMK_Unigene_062768	GO:0003723	GO:0033897
BMK_Unigene_062807	GO:0009733
BMK_Unigene_062835	GO:0006120	GO:0008137	GO:0016021	GO:0031966	GO:0042773	GO:0055114	GO:0070469
BMK_Unigene_062837	GO:0004553	GO:0005975
BMK_Unigene_062843	GO:0016021
BMK_Unigene_062851	GO:0009630
BMK_Unigene_062858	GO:0003735	GO:0006412	GO:0015935
BMK_Unigene_062927	GO:0004672	GO:0005524	GO:0016021
BMK_Unigene_062942	GO:0016021
BMK_Unigene_062951	GO:0003735	GO:0005840	GO:0006412
BMK_Unigene_062971	GO:0000977	GO:0003700	GO:0005634	GO:0045944	GO:0046983
BMK_Unigene_062975	GO:0003674	GO:0005102	GO:0005488	GO:0005515	GO:0005575	GO:0005576	GO:0007154	GO:0007267	GO:0008150	GO:0009987	GO:0023052	GO:0030154	GO:0032502	GO:0033612	GO:0045165	GO:0045168	GO:0048046	GO:0048869
BMK_Unigene_062993	GO:0003735	GO:0006412	GO:0022627
BMK_Unigene_063016	GO:0016021	GO:0080143
BMK_Unigene_063031	GO:0005575	GO:0005622	GO:0005623	GO:0005737	GO:0009507	GO:0009536	GO:0043226	GO:0043227	GO:0043229	GO:0043231	GO:0044424	GO:0044444	GO:0044464
BMK_Unigene_063073	GO:0005618	GO:0030145	GO:0045735	GO:0048046
BMK_Unigene_063112	GO:0003676	GO:0015074
BMK_Unigene_063117	GO:0003677	GO:0005634	GO:0006355
BMK_Unigene_063147	GO:0003674	GO:0003676	GO:0003723	GO:0003743	GO:0003746	GO:0005488	GO:0005575	GO:0005622	GO:0005623	GO:0005634	GO:0006412	GO:0006413	GO:0006452	GO:0006518	GO:0006807	GO:0006950	GO:0006952	GO:0008135	GO:0008150	GO:0008152	GO:0008219	GO:0009058	GO:0009059	GO:0009605	GO:0009607	GO:0009611	GO:0009617	GO:0009888	GO:0009987	GO:0010035	GO:0010038	GO:0010087	GO:0010089	GO:0010467	GO:0012501	GO:0019538	GO:0032502	GO:0034050	GO:0034641	GO:0034645	GO:0042221	GO:0042742	GO:0043022	GO:0043043	GO:0043170	GO:0043207	GO:0043226	GO:0043227	GO:0043229
BMK_Unigene_063159	GO:0000003	GO:0003006	GO:0005575	GO:0005622	GO:0005623	GO:0005737	GO:0005829	GO:0007275	GO:0008150	GO:0009791	GO:0009838	GO:0009908	GO:0010227	GO:0022414	GO:0032501	GO:0032502	GO:0044424	GO:0044444	GO:0044464	GO:0048367	GO:0048437	GO:0048608	GO:0048731	GO:0048856	GO:0061458	GO:0090567	GO:0099402
BMK_Unigene_063170	GO:0003002	GO:0003674	GO:0003824	GO:0004672	GO:0004674	GO:0004675	GO:0004888	GO:0005575	GO:0005622	GO:0005623	GO:0005737	GO:0005768	GO:0005886	GO:0006464	GO:0006468	GO:0006793	GO:0006796	GO:0006807	GO:0006810	GO:0006897	GO:0006898	GO:0006950	GO:0006952	GO:0007154	GO:0007165	GO:0007166	GO:0007167	GO:0007178	GO:0007275	GO:0007389	GO:0008150	GO:0008152	GO:0009595	GO:0009605	GO:0009607	GO:0009617	GO:0009719	GO:0009725	GO:0009733	GO:0009734	GO:0009741	GO:0009742	GO:0009755	GO:0009987	GO:0010033	GO:0010051	GO:0010232	GO:0010233	GO:0010305
BMK_Unigene_063237	GO:0006355
BMK_Unigene_063259	GO:0003785	GO:0007015
BMK_Unigene_063295	GO:0007165	GO:0043531
BMK_Unigene_063344	GO:0004332	GO:0006096
BMK_Unigene_063359	GO:0005347	GO:0005743	GO:0016021
BMK_Unigene_063384	GO:0003743	GO:0003746	GO:0006452	GO:0043022	GO:0045901	GO:0045905
BMK_Unigene_063407	GO:0001101	GO:0003674	GO:0003824	GO:0004364	GO:0005488	GO:0005515	GO:0005575	GO:0005576	GO:0005622	GO:0005623	GO:0005634	GO:0005737	GO:0005773	GO:0005774	GO:0005829	GO:0005886	GO:0006518	GO:0006575	GO:0006725	GO:0006749	GO:0006790	GO:0006807	GO:0006950	GO:0006979	GO:0007154	GO:0008150	GO:0008152	GO:0009056	GO:0009266	GO:0009404	GO:0009407	GO:0009409	GO:0009414	GO:0009415	GO:0009507	GO:0009532	GO:0009536	GO:0009570	GO:0009605	GO:0009628	GO:0009635	GO:0009636	GO:0009719	GO:0009725	GO:0009735	GO:0009987	GO:0009991	GO:0010033	GO:0010035
BMK_Unigene_063483	GO:0004672	GO:0005524
BMK_Unigene_063490	GO:0003735	GO:0006412	GO:0022627
BMK_Unigene_063540	GO:0006511	GO:0007275	GO:0008270	GO:0042025
BMK_Unigene_063544	GO:0016788
BMK_Unigene_063570	GO:0005742	GO:0030150
BMK_Unigene_063610	GO:0016491
BMK_Unigene_063632	GO:0003333	GO:0003674	GO:0005215	GO:0005342	GO:0005488	GO:0005515	GO:0005575	GO:0005622	GO:0005623	GO:0005737	GO:0005739	GO:0005740	GO:0005743	GO:0005744	GO:0006605	GO:0006626	GO:0006810	GO:0006811	GO:0006820	GO:0006839	GO:0006865	GO:0006886	GO:0006996	GO:0007005	GO:0008104	GO:0008150	GO:0008509	GO:0008514	GO:0009507	GO:0009526	GO:0009527	GO:0009536	GO:0009707	GO:0009941	GO:0009987	GO:0015031	GO:0015075	GO:0015171	GO:0015318	GO:0015711	GO:0015833	GO:0015849	GO:0016020	GO:0016021	GO:0016043	GO:0017038	GO:0019866	GO:0019867	GO:0022857
BMK_Unigene_063642	GO:0004222	GO:0006508	GO:0007155	GO:0016020	GO:0016021
BMK_Unigene_063654	GO:0005737	GO:0006006	GO:0006096	GO:0016620	GO:0050661	GO:0051287
BMK_Unigene_063658	GO:0002237	GO:0003674	GO:0003824	GO:0005575	GO:0005576	GO:0005615	GO:0005622	GO:0005623	GO:0005737	GO:0005773	GO:0005886	GO:0005887	GO:0006082	GO:0006508	GO:0006518	GO:0006520	GO:0006536	GO:0006575	GO:0006749	GO:0006751	GO:0006790	GO:0006805	GO:0006807	GO:0006950	GO:0006979	GO:0007568	GO:0008150	GO:0008152	GO:0008233	GO:0008238	GO:0008242	GO:0009056	GO:0009064	GO:0009410	GO:0009605	GO:0009607	GO:0009617	GO:0009636	GO:0009719	GO:0009725	GO:0009987	GO:0010033	GO:0010467	GO:0014070	GO:0016020	GO:0016021	GO:0016485	GO:0016740	GO:0016746
BMK_Unigene_063707	GO:0005743	GO:0006091	GO:0008137	GO:0008150	GO:0008152	GO:0009987	GO:0015980	GO:0016020	GO:0016021	GO:0044237	GO:0045333	GO:0055114
BMK_Unigene_063721	GO:0016021
BMK_Unigene_063731	GO:0000003	GO:0000902	GO:0000904	GO:0003006	GO:0003674	GO:0003676	GO:0003723	GO:0003729	GO:0003735	GO:0005198	GO:0005488	GO:0005575	GO:0005622	GO:0005623	GO:0005634	GO:0005737	GO:0005773	GO:0005774	GO:0005829	GO:0005840	GO:0005844	GO:0005886	GO:0005911	GO:0006412	GO:0006518	GO:0006807	GO:0007275	GO:0008150	GO:0008152	GO:0009058	GO:0009059	GO:0009506	GO:0009653	GO:0009790	GO:0009791	GO:0009793	GO:0009826	GO:0009856	GO:0009860	GO:0009932	GO:0009987	GO:0010154	GO:0010467	GO:0015934	GO:0016020	GO:0016043	GO:0016049	GO:0019538	GO:0022414
BMK_Unigene_063748	GO:0004721
BMK_Unigene_063752	GO:0016042	GO:0016787
BMK_Unigene_063757	GO:0007165	GO:0043531
BMK_Unigene_063762	GO:0030001	GO:0046872
BMK_Unigene_063769	GO:0016021
BMK_Unigene_063772	GO:0005634	GO:0006351	GO:0032502
BMK_Unigene_063776	GO:0005524	GO:0006457	GO:0051082
BMK_Unigene_063796	GO:0008194
BMK_Unigene_063804	GO:0003735	GO:0005840	GO:0006412
BMK_Unigene_063807	GO:0016491
BMK_Unigene_063826	GO:0009055	GO:0016021
BMK_Unigene_063831	GO:0000149	GO:0003674	GO:0005484	GO:0005488	GO:0005515	GO:0005575	GO:0005622	GO:0005623	GO:0005737	GO:0005768	GO:0005886	GO:0006810	GO:0006887	GO:0006906	GO:0006996	GO:0008150	GO:0009507	GO:0009536	GO:0009987	GO:0012505	GO:0016020	GO:0016021	GO:0016043	GO:0016050	GO:0016192	GO:0031201	GO:0031410	GO:0031982	GO:0032940	GO:0032991	GO:0043226	GO:0043227	GO:0043229	GO:0043231	GO:0044424	GO:0044425	GO:0044444	GO:0044464	GO:0046903	GO:0048284	GO:0051179	GO:0051234	GO:0061024	GO:0061025	GO:0071840	GO:0071944	GO:0090174	GO:0097708	GO:0098796
BMK_Unigene_063837	GO:0016021
BMK_Unigene_063846	GO:0016021	GO:0022857
BMK_Unigene_063848	GO:0004672	GO:0005524	GO:0016021
BMK_Unigene_063862	GO:0016021	GO:0022857
BMK_Unigene_063872	GO:0005634	GO:0009299	GO:0009416
BMK_Unigene_063873	GO:0005575	GO:0005622	GO:0005623	GO:0005634	GO:0006139	GO:0006351	GO:0006725	GO:0006807	GO:0008150	GO:0008152	GO:0009058	GO:0009059	GO:0009299	GO:0009314	GO:0009416	GO:0009628	GO:0009653	GO:0009987	GO:0010467	GO:0016070	GO:0016071	GO:0018130	GO:0019438	GO:0032502	GO:0032774	GO:0034641	GO:0034645	GO:0034654	GO:0043170	GO:0043226	GO:0043227	GO:0043229	GO:0043231	GO:0044237	GO:0044238	GO:0044249	GO:0044260	GO:0044271	GO:0044424	GO:0044464	GO:0046483	GO:0048856	GO:0050896	GO:0071704	GO:0090304	GO:0090698	GO:0097659	GO:1901360	GO:1901362
BMK_Unigene_063876	GO:0000287	GO:0005829	GO:0006253	GO:0042262	GO:0047840
BMK_Unigene_063943	GO:0000166	GO:0005829	GO:0006777	GO:0019008	GO:0030366
BMK_Unigene_064004	GO:0003676	GO:0008270	GO:0015074
BMK_Unigene_064014	GO:0016021
BMK_Unigene_064015	GO:0004857	GO:0030599	GO:0042545	GO:0045330	GO:0045490
BMK_Unigene_064055	GO:0000287	GO:0010333
BMK_Unigene_064058	GO:0043531
BMK_Unigene_064167	GO:0004124	GO:0004842	GO:0006535
BMK_Unigene_064183	GO:0005829
BMK_Unigene_064189	GO:0003700	GO:0005634	GO:0043565
BMK_Unigene_064197	GO:0030001	GO:0046872
BMK_Unigene_064215	GO:0008233
BMK_Unigene_064292	GO:0016747
BMK_Unigene_064337	GO:0003677	GO:0003700	GO:0005634
BMK_Unigene_064338	GO:0016747
BMK_Unigene_064374	GO:0003677	GO:0005634
BMK_Unigene_064401	GO:0000902	GO:0003779	GO:0007010
BMK_Unigene_064430	GO:0006006	GO:0016620	GO:0050661	GO:0051287
BMK_Unigene_064484	GO:0003674	GO:0003824	GO:0004175	GO:0004190	GO:0005575	GO:0005622	GO:0005623	GO:0005737	GO:0005773	GO:0005829	GO:0005911	GO:0006508	GO:0006807	GO:0006950	GO:0006970	GO:0008150	GO:0008152	GO:0008233	GO:0009056	GO:0009057	GO:0009506	GO:0009628	GO:0009651	GO:0009719	GO:0009725	GO:0009735	GO:0010033	GO:0010035	GO:0010038	GO:0016787	GO:0019538	GO:0030054	GO:0030163	GO:0042221	GO:0043170	GO:0043226	GO:0043227	GO:0043229	GO:0043231	GO:0044238	GO:0044424	GO:0044444	GO:0044464	GO:0046686	GO:0050896	GO:0055044	GO:0070001	GO:0070011	GO:0071704
BMK_Unigene_064490	GO:0016740
BMK_Unigene_064500	GO:0016491
BMK_Unigene_064506	GO:0005743	GO:0008137	GO:0016021	GO:0042773	GO:0055114	GO:0070469
BMK_Unigene_064552	GO:0010227
BMK_Unigene_064561	GO:0016021
BMK_Unigene_064563	GO:0003723	GO:0003735	GO:0006412	GO:0022625
BMK_Unigene_064570	GO:0004672	GO:0005515	GO:0005524	GO:0016021
BMK_Unigene_064577	GO:0016021
BMK_Unigene_064606	GO:0005347	GO:0005743	GO:0016021
BMK_Unigene_064610	GO:0003676	GO:0046872
BMK_Unigene_064622	GO:0000408	GO:0045944	GO:0070525
BMK_Unigene_064676	GO:0045168
BMK_Unigene_064698	GO:0016021	GO:0022857
BMK_Unigene_064713	GO:0004864	GO:0006952	GO:0009738	GO:0010427	GO:0038023
BMK_Unigene_064720	GO:0000030	GO:0000278	GO:0000281	GO:0000910	GO:0000911	GO:0000919	GO:0001101	GO:0003674	GO:0003824	GO:0005575	GO:0005622	GO:0005623	GO:0005737	GO:0005794	GO:0006950	GO:0006970	GO:0007049	GO:0007275	GO:0008150	GO:0008152	GO:0009414	GO:0009415	GO:0009628	GO:0009651	GO:0009987	GO:0010035	GO:0012505	GO:0016020	GO:0016021	GO:0016043	GO:0016740	GO:0016757	GO:0016758	GO:0016760	GO:0019187	GO:0022402	GO:0022607	GO:0030244	GO:0032501	GO:0032502	GO:0032506	GO:0042221	GO:0042546	GO:0043226	GO:0043227	GO:0043229	GO:0043231	GO:0044085	GO:0044424
BMK_Unigene_064724	GO:0008080
BMK_Unigene_064737	GO:0016020
BMK_Unigene_064749	GO:0005576
BMK_Unigene_064761	GO:0004867	GO:0009611
BMK_Unigene_064770	GO:0000786	GO:0003677	GO:0005634	GO:0046982
BMK_Unigene_064773	GO:0004332	GO:0006096
BMK_Unigene_064801	GO:0016491	GO:0071949
BMK_Unigene_064802	GO:0004674	GO:0005524	GO:0016021	GO:0048544
BMK_Unigene_064857	GO:0005634	GO:0006355	GO:0043565	GO:0046982
BMK_Unigene_064869	GO:0009733
BMK_Unigene_064889	GO:0003735	GO:0005840	GO:0006412
BMK_Unigene_064897	GO:0005575	GO:0005576
BMK_Unigene_064902	GO:0008271	GO:0016021
BMK_Unigene_064912	GO:0009909
BMK_Unigene_064914	GO:0010112
BMK_Unigene_064931	GO:0016021	GO:0016491	GO:0020037	GO:0046872
BMK_Unigene_064945	GO:0000902	GO:0001101	GO:0003674	GO:0003824	GO:0004672	GO:0004674	GO:0005509	GO:0005524	GO:0005575	GO:0005618	GO:0005622	GO:0005623	GO:0005737	GO:0005773	GO:0005886	GO:0005975	GO:0006464	GO:0006468	GO:0006793	GO:0006796	GO:0006807	GO:0006884	GO:0006950	GO:0006952	GO:0007154	GO:0007165	GO:0007166	GO:0008150	GO:0008152	GO:0008361	GO:0009311	GO:0009505	GO:0009605	GO:0009607	GO:0009615	GO:0009620	GO:0009653	GO:0009719	GO:0009725	GO:0009751	GO:0009826	GO:0009987	GO:0009992	GO:0010033	GO:0014070	GO:0016020	GO:0016021	GO:0016043	GO:0016049
BMK_Unigene_064969	GO:0005509
BMK_Unigene_064971	GO:0006355	GO:0042393	GO:0046872
BMK_Unigene_064996	GO:0003676	GO:0008270
BMK_Unigene_065001	GO:0016021	GO:0030599	GO:0042545	GO:0045330	GO:0045490
BMK_Unigene_065002	GO:0006952
BMK_Unigene_065009	GO:0004674	GO:0005524
BMK_Unigene_065015	GO:0003677	GO:0005634
BMK_Unigene_065028	GO:0005509
BMK_Unigene_065031	GO:0005515	GO:0005575	GO:0005623	GO:0005886	GO:0006950	GO:0006952	GO:0007154	GO:0007165	GO:0008150	GO:0009987	GO:0016020	GO:0023052	GO:0043531	GO:0044464	GO:0050789	GO:0050794	GO:0050896	GO:0051716	GO:0065007	GO:0071944
BMK_Unigene_065033	GO:0005886	GO:0016021
BMK_Unigene_065038	GO:0005515
BMK_Unigene_065043	GO:0033180	GO:0046961
BMK_Unigene_065045	GO:0010274
BMK_Unigene_065088	GO:0046983
BMK_Unigene_065091	GO:0005524	GO:0005783	GO:0016887
BMK_Unigene_065118	GO:0004568	GO:0005975	GO:0006032	GO:0016998
BMK_Unigene_065121	GO:0046872	GO:0051213
BMK_Unigene_065135	GO:0000387	GO:0005681	GO:0005829
BMK_Unigene_065143	GO:0004222	GO:0006508	GO:0007155	GO:0016020
BMK_Unigene_065147	GO:0005575	GO:0005622	GO:0005623	GO:0005634	GO:0005737	GO:0043226	GO:0043227	GO:0043229	GO:0043231	GO:0044424	GO:0044464	GO:0120009	GO:0120013
BMK_Unigene_065175	GO:0008171	GO:0032259	GO:0046983
BMK_Unigene_065178	GO:0000287	GO:0004019	GO:0005525	GO:0009507	GO:0044208
BMK_Unigene_065195	GO:0003676	GO:0008408
BMK_Unigene_065216	GO:0005975	GO:0008422
BMK_Unigene_065221	GO:0005509
BMK_Unigene_065228	GO:0004553	GO:0005975
BMK_Unigene_065230	GO:0047617
BMK_Unigene_065267	GO:0004553	GO:0005975
BMK_Unigene_065303	GO:0016021
BMK_Unigene_065308	GO:0003735	GO:0005840	GO:0006412
BMK_Unigene_065309	GO:0003723	GO:0003735	GO:0005840	GO:0006412
BMK_Unigene_065312	GO:0004674	GO:0005524
BMK_Unigene_065315	GO:0016788
BMK_Unigene_065330	GO:0003735	GO:0005840	GO:0006412
BMK_Unigene_065336	GO:0004252	GO:0006508
BMK_Unigene_065349	GO:0016021
BMK_Unigene_065360	GO:0046983
BMK_Unigene_065392	GO:0004864	GO:0006952	GO:0009738	GO:0010427	GO:0038023
BMK_Unigene_065393	GO:0003333	GO:0003674	GO:0005215	GO:0005342	GO:0005575	GO:0005623	GO:0005886	GO:0005887	GO:0006810	GO:0006811	GO:0006820	GO:0006865	GO:0008150	GO:0008509	GO:0008514	GO:0015075	GO:0015171	GO:0015179	GO:0015291	GO:0015297	GO:0015318	GO:0015711	GO:0015807	GO:0015849	GO:0016020	GO:0016021	GO:0022804	GO:0022857	GO:0031224	GO:0031226	GO:0032991	GO:0034220	GO:0044425	GO:0044459	GO:0044464	GO:0046942	GO:0046943	GO:0051179	GO:0051234	GO:0055085	GO:0071702	GO:0071705	GO:0071944	GO:0098656	GO:0098796	GO:0098797	GO:1902475	GO:1903825	GO:1905039
BMK_Unigene_065401	GO:0000786	GO:0003677	GO:0005634	GO:0046982
BMK_Unigene_065405	GO:0000398	GO:0005689	GO:0015078	GO:0015986	GO:0045263
BMK_Unigene_065417	GO:0003735	GO:0006412	GO:0022627
BMK_Unigene_065437	GO:0004857
BMK_Unigene_065438	GO:0003743
BMK_Unigene_065444	GO:0016787
BMK_Unigene_065460	GO:0004857
BMK_Unigene_065463	GO:0003677	GO:0005634	GO:0042025	GO:0046872
BMK_Unigene_065469	GO:0033743	GO:0055114
BMK_Unigene_065470	GO:0000302	GO:0000304	GO:0003674	GO:0003700	GO:0005575	GO:0005622	GO:0005623	GO:0005634	GO:0005737	GO:0006355	GO:0006950	GO:0006979	GO:0007154	GO:0007584	GO:0008150	GO:0009605	GO:0009889	GO:0009987	GO:0009991	GO:0010035	GO:0010468	GO:0010556	GO:0019219	GO:0019222	GO:0031323	GO:0031326	GO:0031667	GO:0031668	GO:0031669	GO:0031670	GO:0033554	GO:0034599	GO:0034614	GO:0035690	GO:0042221	GO:0042493	GO:0043226	GO:0043227	GO:0043229	GO:0043231	GO:0044424	GO:0044464	GO:0050789	GO:0050794	GO:0050896	GO:0051171	GO:0051252	GO:0051716	GO:0060255
BMK_Unigene_065475	GO:0003677	GO:0005634
BMK_Unigene_065483	GO:0003735	GO:0005840	GO:0006412
BMK_Unigene_065494	GO:0003735	GO:0005840	GO:0006412
BMK_Unigene_065505	GO:0005509
BMK_Unigene_065523	GO:0006004	GO:0016021	GO:0016757
BMK_Unigene_065556	GO:0002376	GO:0002682	GO:0003674	GO:0003824	GO:0004672	GO:0004674	GO:0005524	GO:0005575	GO:0005623	GO:0005886	GO:0005911	GO:0006464	GO:0006468	GO:0006793	GO:0006796	GO:0006807	GO:0006950	GO:0006952	GO:0006955	GO:0008150	GO:0008152	GO:0009506	GO:0009605	GO:0009607	GO:0009611	GO:0009814	GO:0009861	GO:0009987	GO:0016020	GO:0016021	GO:0016301	GO:0016310	GO:0016740	GO:0016772	GO:0016773	GO:0019538	GO:0030054	GO:0031347	GO:0036211	GO:0043170	GO:0043207	GO:0043412	GO:0044237	GO:0044238	GO:0044260	GO:0044267	GO:0044464	GO:0045087	GO:0045088
BMK_Unigene_065566	GO:0000786	GO:0003677	GO:0005634	GO:0016021	GO:0046982
BMK_Unigene_065567	GO:0007155	GO:0030246
BMK_Unigene_065597	GO:0016021
BMK_Unigene_065612	GO:0005515
BMK_Unigene_065615	GO:0016021
BMK_Unigene_065621	GO:0005524	GO:0016021	GO:0016887	GO:0042626
BMK_Unigene_065656	GO:0005840
BMK_Unigene_065672	GO:0003674	GO:0003824	GO:0005215	GO:0005388	GO:0005524	GO:0005575	GO:0005622	GO:0005623	GO:0005886	GO:0005887	GO:0006810	GO:0006811	GO:0006812	GO:0006816	GO:0008150	GO:0008324	GO:0015075	GO:0015085	GO:0015318	GO:0015399	GO:0015405	GO:0015662	GO:0016020	GO:0016021	GO:0016462	GO:0016787	GO:0016817	GO:0016818	GO:0016887	GO:0017111	GO:0019829	GO:0022804	GO:0022853	GO:0022857	GO:0022890	GO:0030001	GO:0031224	GO:0031226	GO:0034220	GO:0042623	GO:0042625	GO:0042626	GO:0043226	GO:0043227	GO:0043229	GO:0043231	GO:0043492	GO:0044424	GO:0044425
BMK_Unigene_065674	GO:0004124	GO:0006535
BMK_Unigene_065679	GO:0004721
BMK_Unigene_065691	GO:0003723	GO:0003735	GO:0006412	GO:0015934
BMK_Unigene_065697	GO:0004497	GO:0005506	GO:0016021	GO:0016705	GO:0020037
BMK_Unigene_065700	GO:0004553	GO:0005975
BMK_Unigene_065720	GO:0016021
BMK_Unigene_065729	GO:0005524	GO:0016021
BMK_Unigene_065772	GO:0003735	GO:0005840	GO:0006412	GO:0046872
BMK_Unigene_065788	GO:0003755	GO:0016021
BMK_Unigene_065794	GO:0016021
BMK_Unigene_065802	GO:0016021
BMK_Unigene_065812	GO:0016740
BMK_Unigene_065817	GO:0004553	GO:0005975
BMK_Unigene_065819	GO:0008194
BMK_Unigene_065822	GO:0009535	GO:0009706	GO:0016021
BMK_Unigene_065846	GO:0048364
BMK_Unigene_065847	GO:0016740
BMK_Unigene_065868	GO:0016021	GO:0030599	GO:0042545	GO:0045330	GO:0045490	GO:0052689
BMK_Unigene_065869	GO:0005524	GO:0007165	GO:0016307
BMK_Unigene_065878	GO:0004623	GO:0005509	GO:0005576	GO:0006644	GO:0016042	GO:0050482
BMK_Unigene_065880	GO:0003677	GO:0005634
BMK_Unigene_065885	GO:0015297	GO:0016021	GO:0042910
BMK_Unigene_065941	GO:0003723	GO:0003735	GO:0006412	GO:0019843	GO:0022625	GO:0046872
BMK_Unigene_065954	GO:0016021
BMK_Unigene_065973	GO:0003677
BMK_Unigene_065977	GO:0004674	GO:0005524
BMK_Unigene_065981	GO:0047617
BMK_Unigene_065982	GO:0004519
BMK_Unigene_065992	GO:0005524	GO:0016021	GO:0016887	GO:0042626
BMK_Unigene_066004	GO:0008171	GO:0032259	GO:0046983
BMK_Unigene_066014	GO:0003746	GO:0003924	GO:0005525
BMK_Unigene_066034	GO:0016021
BMK_Unigene_066069	GO:0005524	GO:0033180	GO:0046034	GO:0046961
BMK_Unigene_066076	GO:0005179	GO:0005576	GO:0048364	GO:1901371	GO:1902025	GO:2000280
BMK_Unigene_066093	GO:0005509
BMK_Unigene_066110	GO:0016021
BMK_Unigene_066114	GO:0004709	GO:0005524
BMK_Unigene_066123	GO:0000976	GO:0003700	GO:0005634	GO:0030154	GO:0043565
BMK_Unigene_066124	GO:0030001	GO:0046872
BMK_Unigene_066138	GO:0004553	GO:0005975
BMK_Unigene_066141	GO:0000139	GO:0006890	GO:0015031	GO:0030126
BMK_Unigene_066164	GO:0003735	GO:0005840	GO:0006412
BMK_Unigene_066168	GO:0000287	GO:0010333
BMK_Unigene_066181	GO:0030001	GO:0046872
BMK_Unigene_066186	GO:0004672	GO:0005524
BMK_Unigene_066189	GO:0016021
BMK_Unigene_066203	GO:0003677	GO:0005634	GO:0006355
BMK_Unigene_066219	GO:0000041	GO:0000060	GO:0000165	GO:0000302	GO:0000303	GO:0000305	GO:0000323	GO:0001558	GO:0001666	GO:0001775	GO:0001932	GO:0001934	GO:0002237	GO:0002274	GO:0002376	GO:0002520	GO:0002521	GO:0002573	GO:0003674	GO:0004857	GO:0004866	GO:0004869	GO:0005488	GO:0005507	GO:0005575	GO:0005576	GO:0005615	GO:0005622	GO:0005623	GO:0005634	GO:0005737	GO:0005739	GO:0005740	GO:0005741	GO:0005764	GO:0005773	GO:0005783	GO:0005791	GO:0005829	GO:0005840	GO:0005856	GO:0005874	GO:0005886	GO:0006066	GO:0006091	GO:0006112	GO:0006325	GO:0006355	GO:0006357
BMK_Unigene_066221	GO:0016021
BMK_Unigene_066227	GO:0005783	GO:0005794	GO:0030008	GO:0048193
BMK_Unigene_066233	GO:0004674	GO:0005524
BMK_Unigene_066251	GO:0045486	GO:0046872
BMK_Unigene_066277	GO:0005737	GO:0005885	GO:0034314	GO:0051015
BMK_Unigene_066280	GO:0003723	GO:0005575	GO:0005622	GO:0005623	GO:0005634	GO:0005737	GO:0043226	GO:0043227	GO:0043229	GO:0043231	GO:0044424	GO:0044464
BMK_Unigene_066282	GO:0000786	GO:0003677	GO:0005634	GO:0006334	GO:0006355	GO:0042025
BMK_Unigene_066284	GO:0005802	GO:0005829	GO:0006605	GO:0016192	GO:0030131	GO:0031410	GO:0043231	GO:0090160
BMK_Unigene_066301	GO:0046983
BMK_Unigene_066306	GO:0005525	GO:0005737	GO:0006886	GO:0016192
BMK_Unigene_066308	GO:0000150	GO:0000724	GO:0003690	GO:0003697	GO:0005524	GO:0005634	GO:0005801	GO:0006886	GO:0008094	GO:0016020	GO:1990426
BMK_Unigene_066312	GO:0003674	GO:0003700	GO:0005488	GO:0005515	GO:0005575	GO:0005622	GO:0005623	GO:0005634	GO:0005737	GO:0008150	GO:0042802	GO:0042803	GO:0043226	GO:0043227	GO:0043229	GO:0043231	GO:0044424	GO:0044464	GO:0046983	GO:0047484	GO:0048519	GO:0048583	GO:0048585	GO:0050789	GO:0065007	GO:0080134	GO:1901000	GO:1901001
BMK_Unigene_066326	GO:0004672	GO:0005524
BMK_Unigene_066329	GO:0016021
BMK_Unigene_066334	GO:0005840	GO:0042254
BMK_Unigene_066339	GO:0003825	GO:0004805	GO:0005992
BMK_Unigene_066340	GO:0003825	GO:0004805	GO:0005992
BMK_Unigene_066344	GO:0007064	GO:0031390
BMK_Unigene_066347	GO:0004672	GO:0005524	GO:0016021
BMK_Unigene_066361	GO:0016021
BMK_Unigene_066399	GO:0004672	GO:0005524	GO:0016021
BMK_Unigene_066403	GO:0016021
BMK_Unigene_066404	GO:0015276	GO:0016021
BMK_Unigene_066427	GO:0004674	GO:0005524	GO:0016021
BMK_Unigene_066431	GO:0006511
BMK_Unigene_066482	GO:0003700
BMK_Unigene_066502	GO:0005524	GO:0016021	GO:0016887	GO:0042626
BMK_Unigene_066505	GO:0003723
BMK_Unigene_066513	GO:0005509
BMK_Unigene_066517	GO:0004364	GO:0005737	GO:0006749	GO:0043295
BMK_Unigene_066520	GO:0008270
BMK_Unigene_066521	GO:0016491	GO:0046872
BMK_Unigene_066528	GO:0007010	GO:0008017
BMK_Unigene_066530	GO:0003735	GO:0005840	GO:0006412
BMK_Unigene_066533	GO:0003743
BMK_Unigene_066538	GO:0016021
BMK_Unigene_066548	GO:0016021
BMK_Unigene_066554	GO:0003676	GO:0008270
BMK_Unigene_066560	GO:0003676	GO:0003743	GO:0005575	GO:0005622	GO:0005623	GO:0005737	GO:0005852	GO:0031369	GO:0032991	GO:0044424	GO:0044444	GO:0044464
BMK_Unigene_066568	GO:0008233
BMK_Unigene_066578	GO:0016747
BMK_Unigene_066586	GO:0005575	GO:0005623	GO:0005886	GO:0006950	GO:0006952	GO:0007154	GO:0007165	GO:0008150	GO:0009987	GO:0016020	GO:0023052	GO:0043531	GO:0044464	GO:0050789	GO:0050794	GO:0050896	GO:0051716	GO:0065007	GO:0071944
BMK_Unigene_066592	GO:0003677
BMK_Unigene_066593	GO:0003674	GO:0003824	GO:0004842	GO:0006464	GO:0006508	GO:0006511	GO:0006807	GO:0006950	GO:0006970	GO:0008150	GO:0008152	GO:0009056	GO:0009057	GO:0009628	GO:0009651	GO:0009787	GO:0009789	GO:0009966	GO:0009967	GO:0009987	GO:0010498	GO:0010646	GO:0010647	GO:0016567	GO:0016740	GO:0019538	GO:0019787	GO:0019941	GO:0023051	GO:0023056	GO:0030163	GO:0032446	GO:0036211	GO:0043161	GO:0043170	GO:0043412	GO:0043632	GO:0044237	GO:0044238	GO:0044248	GO:0044257	GO:0044260	GO:0044265	GO:0044267	GO:0047484	GO:0048518	GO:0048522	GO:0048583	GO:0048584
BMK_Unigene_066609	GO:0004864	GO:0006952	GO:0009738	GO:0010427	GO:0038023
BMK_Unigene_066620	GO:0046983
BMK_Unigene_066630	GO:0000160	GO:0005634
BMK_Unigene_066641	GO:0004672	GO:0005524
BMK_Unigene_066664	GO:0000387	GO:0005681	GO:0005732
BMK_Unigene_066673	GO:0000786	GO:0003677	GO:0005634	GO:0046982
BMK_Unigene_066681	GO:0005774	GO:0015078	GO:0016021	GO:0033179
BMK_Unigene_066724	GO:0004474	GO:0006097	GO:0006099
BMK_Unigene_066742	GO:0016021
BMK_Unigene_066745	GO:0003676
BMK_Unigene_066747	GO:0016788
BMK_Unigene_066748	GO:0016020	GO:0055114
BMK_Unigene_066749	GO:0005575	GO:0005622	GO:0005623	GO:0005737	GO:0005739	GO:0005740	GO:0005743	GO:0005746	GO:0005747	GO:0016020	GO:0019866	GO:0030964	GO:0031090	GO:0031966	GO:0031967	GO:0031975	GO:0032991	GO:0043226	GO:0043227	GO:0043229	GO:0043231	GO:0044422	GO:0044424	GO:0044425	GO:0044429	GO:0044444	GO:0044446	GO:0044455	GO:0044464	GO:0045271	GO:0070469	GO:0098796	GO:0098798	GO:0098800	GO:0098803	GO:1902494	GO:1990204
BMK_Unigene_066760	GO:0016021
BMK_Unigene_066764	GO:0008171	GO:0032259
BMK_Unigene_066767	GO:0003735	GO:0005840	GO:0006412
BMK_Unigene_066772	GO:0010227
BMK_Unigene_066773	GO:0005524	GO:0016021	GO:0042026
BMK_Unigene_066794	GO:0005509	GO:0005544	GO:0005737
BMK_Unigene_066807	GO:0000375	GO:0000377	GO:0000398	GO:0003674	GO:0003676	GO:0003724	GO:0003824	GO:0004004	GO:0004386	GO:0005524	GO:0005575	GO:0005622	GO:0005623	GO:0005634	GO:0005654	GO:0005681	GO:0005737	GO:0006139	GO:0006396	GO:0006397	GO:0006403	GO:0006405	GO:0006406	GO:0006611	GO:0006725	GO:0006807	GO:0006810	GO:0006886	GO:0006913	GO:0008026	GO:0008104	GO:0008150	GO:0008152	GO:0008186	GO:0008380	GO:0009987	GO:0010467	GO:0015031	GO:0015833	GO:0015931	GO:0016021	GO:0016070	GO:0016071	GO:0016462	GO:0016787	GO:0016817	GO:0016818	GO:0016887	GO:0017111
BMK_Unigene_066808	GO:0003674	GO:0003824	GO:0005488	GO:0005506	GO:0005575	GO:0005622	GO:0005623	GO:0005737	GO:0006139	GO:0006259	GO:0006281	GO:0006304	GO:0006307	GO:0006725	GO:0006807	GO:0006950	GO:0006974	GO:0008150	GO:0008152	GO:0008198	GO:0009451	GO:0009987	GO:0016070	GO:0016491	GO:0016705	GO:0016706	GO:0032451	GO:0033554	GO:0034641	GO:0035510	GO:0035511	GO:0035513	GO:0035515	GO:0035552	GO:0035553	GO:0042245	GO:0043167	GO:0043169	GO:0043170	GO:0043412	GO:0043734	GO:0044237	GO:0044238	GO:0044260	GO:0044424	GO:0044464	GO:0044728	GO:0046483	GO:0046872
BMK_Unigene_066813	GO:0003677	GO:0003910	GO:0005524	GO:0006260	GO:0006310	GO:0051103	GO:0071897
BMK_Unigene_066815	GO:0046872
BMK_Unigene_066818	GO:0003712	GO:0006357	GO:0016592	GO:0070847
BMK_Unigene_066823	GO:0006952	GO:0043531
BMK_Unigene_066825	GO:0005575	GO:0005623	GO:0005886	GO:0006950	GO:0006952	GO:0007154	GO:0007165	GO:0008150	GO:0009987	GO:0016020	GO:0023052	GO:0043531	GO:0044464	GO:0050789	GO:0050794	GO:0050896	GO:0051716	GO:0065007	GO:0071944
BMK_Unigene_066826	GO:0001067	GO:0001101	GO:0003674	GO:0003676	GO:0003677	GO:0003700	GO:0005488	GO:0005575	GO:0005622	GO:0005623	GO:0005634	GO:0005737	GO:0005829	GO:0005840	GO:0006355	GO:0007154	GO:0007165	GO:0008150	GO:0009719	GO:0009725	GO:0009735	GO:0009736	GO:0009739	GO:0009740	GO:0009755	GO:0009787	GO:0009788	GO:0009888	GO:0009889	GO:0009966	GO:0009968	GO:0009987	GO:0010026	GO:0010033	GO:0010468	GO:0010476	GO:0010556	GO:0010646	GO:0010648	GO:0019219	GO:0019222	GO:0022626	GO:0023051	GO:0023052	GO:0023057	GO:0030154	GO:0031323	GO:0031326	GO:0032502
BMK_Unigene_066836	GO:0001101	GO:0001558	GO:0003674	GO:0003779	GO:0005488	GO:0005515	GO:0005575	GO:0005622	GO:0005623	GO:0005737	GO:0005829	GO:0005856	GO:0005884	GO:0006810	GO:0006996	GO:0007010	GO:0007015	GO:0007275	GO:0008064	GO:0008092	GO:0008150	GO:0008154	GO:0009605	GO:0009606	GO:0009628	GO:0009629	GO:0009630	GO:0009653	GO:0009719	GO:0009725	GO:0009737	GO:0009888	GO:0009987	GO:0010015	GO:0010033	GO:0010035	GO:0010038	GO:0010053	GO:0010054	GO:0010639	GO:0010817	GO:0015629	GO:0016043	GO:0016049	GO:0016482	GO:0021700	GO:0022411	GO:0022607	GO:0022622
BMK_Unigene_066837	GO:0004553	GO:0005975
BMK_Unigene_066844	GO:0009055	GO:0015035
BMK_Unigene_066867	GO:0000578	GO:0003674	GO:0003824	GO:0004842	GO:0005488	GO:0005515	GO:0005575	GO:0005622	GO:0005623	GO:0005634	GO:0006464	GO:0006508	GO:0006511	GO:0006807	GO:0007275	GO:0007389	GO:0008134	GO:0008150	GO:0008152	GO:0009056	GO:0009057	GO:0009790	GO:0009798	GO:0009880	GO:0009987	GO:0016567	GO:0016740	GO:0019538	GO:0019787	GO:0019941	GO:0030163	GO:0032446	GO:0032501	GO:0032502	GO:0036211	GO:0042802	GO:0043170	GO:0043226	GO:0043227	GO:0043229	GO:0043231	GO:0043412	GO:0043632	GO:0044237	GO:0044238	GO:0044248	GO:0044257	GO:0044260	GO:0044265
BMK_Unigene_066875	GO:0006464
BMK_Unigene_066882	GO:0004497	GO:0005506	GO:0016705	GO:0020037
BMK_Unigene_066892	GO:0016614	GO:0050660
BMK_Unigene_066893	GO:0004672	GO:0005524
BMK_Unigene_066899	GO:0016021
BMK_Unigene_066900	GO:0016021	GO:0016740
BMK_Unigene_066916	GO:0008270
BMK_Unigene_066918	GO:0016301
BMK_Unigene_066922	GO:0001101	GO:0004553	GO:0005618	GO:0005975	GO:0006073	GO:0006950	GO:0008150	GO:0009414	GO:0009415	GO:0009628	GO:0010035	GO:0016762	GO:0042221	GO:0048046	GO:0050896	GO:1901700
BMK_Unigene_066929	GO:0032299
BMK_Unigene_066940	GO:0008270	GO:0016491
BMK_Unigene_066941	GO:0005634	GO:0006260
BMK_Unigene_066942	GO:0004866
BMK_Unigene_066945	GO:0005575	GO:0005623	GO:0005886	GO:0006950	GO:0006952	GO:0007154	GO:0007165	GO:0008150	GO:0009987	GO:0016020	GO:0023052	GO:0043531	GO:0044464	GO:0050789	GO:0050794	GO:0050896	GO:0051716	GO:0065007	GO:0071944
BMK_Unigene_066976	GO:0004735	GO:0006561	GO:0016021
BMK_Unigene_066988	GO:0046983
BMK_Unigene_066992	GO:0003735	GO:0005840	GO:0006412	GO:0008270
BMK_Unigene_066998	GO:0030001	GO:0046872
BMK_Unigene_067021	GO:0008270	GO:0016491
BMK_Unigene_067022	GO:0016021
BMK_Unigene_067031	GO:0003677	GO:0005634
BMK_Unigene_067041	GO:0003677
BMK_Unigene_067049	GO:0003735	GO:0006412	GO:0015934
BMK_Unigene_067061	GO:0004672	GO:0005524
BMK_Unigene_067062	GO:0004674	GO:0005524	GO:0005737	GO:0005829	GO:0007165
BMK_Unigene_067070	GO:0001101	GO:0005575	GO:0005576	GO:0007154	GO:0007165	GO:0008150	GO:0009719	GO:0009725	GO:0009739	GO:0009740	GO:0009755	GO:0009987	GO:0010033	GO:0010476	GO:0019725	GO:0023052	GO:0032870	GO:0033993	GO:0042221	GO:0042592	GO:0045454	GO:0050789	GO:0050794	GO:0050896	GO:0051716	GO:0065007	GO:0065008	GO:0070887	GO:0071229	GO:0071310	GO:0071370	GO:0071396	GO:0071495	GO:1901700	GO:1901701
BMK_Unigene_067075	GO:0016021
BMK_Unigene_067080	GO:0006355	GO:0046983
BMK_Unigene_067090	GO:0005634	GO:0006511	GO:0008270	GO:0016567	GO:0031461	GO:0061630	GO:0097602
BMK_Unigene_067093	GO:0016021
BMK_Unigene_067094	GO:0016021
BMK_Unigene_067102	GO:0004190
BMK_Unigene_067103	GO:0005634	GO:0009299	GO:0009416
BMK_Unigene_067104	GO:0008168	GO:0032259
BMK_Unigene_067105	GO:0006662	GO:0015035	GO:0045454
BMK_Unigene_067111	GO:0003735	GO:0005840	GO:0006412
BMK_Unigene_067112	GO:0016021	GO:0016787
BMK_Unigene_067115	GO:0003676
BMK_Unigene_067118	GO:0016021
BMK_Unigene_067143	GO:0010181	GO:0016491
BMK_Unigene_067144	GO:0010181	GO:0016491
BMK_Unigene_067154	GO:0009733
BMK_Unigene_067165	GO:0004497	GO:0005506	GO:0016705	GO:0020037
BMK_Unigene_067172	GO:0005524	GO:0016021	GO:0016887
BMK_Unigene_067181	GO:0005319	GO:0006869
BMK_Unigene_067185	GO:0000976	GO:0003700	GO:0005634	GO:0030154	GO:0043565
BMK_Unigene_067192	GO:0004497	GO:0005506	GO:0016021	GO:0016705	GO:0020037
BMK_Unigene_067196	GO:0003712	GO:0004402	GO:0006355	GO:0008270	GO:0042025
BMK_Unigene_067204	GO:0000287	GO:0010333
BMK_Unigene_067210	GO:0006952
BMK_Unigene_067218	GO:0016021
BMK_Unigene_067224	GO:0003723
BMK_Unigene_067226	GO:0004864	GO:0006952	GO:0009738	GO:0010427	GO:0038023
BMK_Unigene_067233	GO:0009733
BMK_Unigene_067234	GO:0016021
BMK_Unigene_067249	GO:0009055	GO:0016021
BMK_Unigene_067256	GO:0046983
BMK_Unigene_067259	GO:0016021	GO:0016829
BMK_Unigene_067261	GO:0004553	GO:0005975
BMK_Unigene_067268	GO:0008080
BMK_Unigene_067277	GO:0000287	GO:0001666	GO:0005829	GO:0016831	GO:0030976
BMK_Unigene_067283	GO:0000322	GO:0000325	GO:0000326	GO:0003674	GO:0005215	GO:0005275	GO:0005372	GO:0005488	GO:0005515	GO:0005575	GO:0005618	GO:0005622	GO:0005623	GO:0005737	GO:0005773	GO:0005774	GO:0005794	GO:0005886	GO:0005887	GO:0005911	GO:0006810	GO:0006811	GO:0006812	GO:0006833	GO:0008150	GO:0008324	GO:0008519	GO:0009505	GO:0009506	GO:0009507	GO:0009526	GO:0009536	GO:0009705	GO:0009941	GO:0012505	GO:0015075	GO:0015101	GO:0015200	GO:0015250	GO:0015267	GO:0015318	GO:0015695	GO:0015696	GO:0015837	GO:0015843	GO:0016020	GO:0016021	GO:0019755	GO:0022803
BMK_Unigene_067290	GO:0009507
BMK_Unigene_067298	GO:0016301	GO:0030247
BMK_Unigene_067308	GO:0016702	GO:0046872
BMK_Unigene_067322	GO:0016787
BMK_Unigene_067328	GO:0000003	GO:0003006	GO:0005575	GO:0005622	GO:0005623	GO:0005634	GO:0005737	GO:0007275	GO:0008150	GO:0009791	GO:0009909	GO:0009910	GO:0010228	GO:0022414	GO:0032501	GO:0032502	GO:0043226	GO:0043227	GO:0043229	GO:0043231	GO:0044424	GO:0044464	GO:0048519	GO:0048580	GO:0048581	GO:0048608	GO:0048731	GO:0048831	GO:0048856	GO:0050789	GO:0050793	GO:0051093	GO:0051239	GO:0051241	GO:0061458	GO:0065007	GO:2000026	GO:2000241	GO:2000242
BMK_Unigene_067336	GO:0003674	GO:0003676	GO:0003723	GO:0003824	GO:0004518	GO:0004519	GO:0005488	GO:0005575	GO:0005622	GO:0005623	GO:0006139	GO:0006725	GO:0006807	GO:0008150	GO:0008152	GO:0009451	GO:0009987	GO:0016070	GO:0016787	GO:0016788	GO:0034641	GO:0043170	GO:0043226	GO:0043227	GO:0043229	GO:0043231	GO:0043412	GO:0044237	GO:0044238	GO:0044424	GO:0044464	GO:0046483	GO:0071704	GO:0090304	GO:0090305	GO:0097159	GO:1901360	GO:1901363
BMK_Unigene_067340	GO:0004857
BMK_Unigene_067346	GO:0003735	GO:0005840	GO:0006412
BMK_Unigene_067351	GO:0016021
BMK_Unigene_067353	GO:0003700	GO:0005634	GO:0043565
BMK_Unigene_067356	GO:0016491
BMK_Unigene_067360	GO:0016021	GO:0016301	GO:0046872
BMK_Unigene_067363	GO:0006952	GO:0043531
BMK_Unigene_067368	GO:0016021	GO:0016740
BMK_Unigene_067374	GO:0016491	GO:0046872
BMK_Unigene_067385	GO:0016866	GO:0071669
BMK_Unigene_067404	GO:0008194	GO:0008483
BMK_Unigene_067405	GO:0005840
BMK_Unigene_067407	GO:0000786	GO:0003677	GO:0005634	GO:0006352	GO:0042025	GO:0046982
BMK_Unigene_067413	GO:0005524
BMK_Unigene_067415	GO:0016021
BMK_Unigene_067422	GO:0071949
BMK_Unigene_067424	GO:0030014
BMK_Unigene_067433	GO:0003755
BMK_Unigene_067435	GO:0003677	GO:0006357	GO:0046983
BMK_Unigene_067437	GO:0003746	GO:0003924	GO:0005525
BMK_Unigene_067460	GO:0008168	GO:0032259
BMK_Unigene_067463	GO:0003700	GO:0005634	GO:0043565
BMK_Unigene_067466	GO:0016021
BMK_Unigene_067468	GO:0016021
BMK_Unigene_067474	GO:0016021	GO:0022857
BMK_Unigene_067478	GO:0008150	GO:0008285	GO:0042127	GO:0048519	GO:0048523	GO:0050789	GO:0050794	GO:0065007
BMK_Unigene_067479	GO:0005575	GO:0005623	GO:0005886	GO:0006950	GO:0006952	GO:0007154	GO:0007165	GO:0008150	GO:0009987	GO:0016020	GO:0023052	GO:0043531	GO:0044464	GO:0050789	GO:0050794	GO:0050896	GO:0051716	GO:0065007	GO:0071944
BMK_Unigene_067500	GO:0005524	GO:0042026
BMK_Unigene_067504	GO:0048046
BMK_Unigene_067506	GO:0000398	GO:0000956	GO:0003723	GO:0005681	GO:0005688	GO:0046540
BMK_Unigene_067507	GO:0016021
BMK_Unigene_067508	GO:0005829	GO:0008289	GO:0016020	GO:0035627	GO:0120009	GO:1902387	GO:1902388
BMK_Unigene_067539	GO:0003924	GO:0005200	GO:0005525	GO:0005737	GO:0005874	GO:0007017
BMK_Unigene_067545	GO:0003676	GO:0008270
BMK_Unigene_067558	GO:0016021
BMK_Unigene_067565	GO:0005758	GO:0006825	GO:0016531
BMK_Unigene_067569	GO:0004672	GO:0005524	GO:0016021
BMK_Unigene_067571	GO:0003677	GO:0003700	GO:0005634
BMK_Unigene_067575	GO:0006351
BMK_Unigene_067577	GO:0004252
BMK_Unigene_067580	GO:0000323	GO:0001775	GO:0002252	GO:0002263	GO:0002274	GO:0002275	GO:0002283	GO:0002366	GO:0002376	GO:0002443	GO:0002444	GO:0002446	GO:0003674	GO:0003824	GO:0004553	GO:0004568	GO:0005488	GO:0005575	GO:0005576	GO:0005615	GO:0005622	GO:0005623	GO:0005737	GO:0005764	GO:0005773	GO:0005975	GO:0006022	GO:0006026	GO:0006030	GO:0006032	GO:0006040	GO:0006807	GO:0006810	GO:0006887	GO:0006955	GO:0007586	GO:0008061	GO:0008144	GO:0008150	GO:0008152	GO:0008843	GO:0009056	GO:0009057	GO:0009605	GO:0009607	GO:0009617	GO:0009987	GO:0012505	GO:0016192
BMK_Unigene_067594	GO:0005524	GO:0016740
BMK_Unigene_067597	GO:0003735	GO:0005634	GO:0005737	GO:0005840	GO:0006412	GO:0016021	GO:0016567	GO:0019941	GO:0031386	GO:0031625
BMK_Unigene_067599	GO:0004601	GO:0005509	GO:0016021	GO:0050664
BMK_Unigene_067602	GO:0003677	GO:0046983
BMK_Unigene_067609	GO:0000398	GO:0005681
BMK_Unigene_067610	GO:0000375	GO:0000377	GO:0000398	GO:0003674	GO:0003676	GO:0003723	GO:0005488	GO:0005575	GO:0005622	GO:0005623	GO:0005634	GO:0005681	GO:0005684	GO:0006139	GO:0006396	GO:0006397	GO:0006725	GO:0006807	GO:0008150	GO:0008152	GO:0008380	GO:0009987	GO:0010467	GO:0016070	GO:0016071	GO:0032991	GO:0034641	GO:0043170	GO:0043226	GO:0043227	GO:0043229	GO:0043231	GO:0044237	GO:0044238	GO:0044422	GO:0044424	GO:0044428	GO:0044446	GO:0044464	GO:0046483	GO:0071007	GO:0071013	GO:0071704	GO:0090304	GO:0097159	GO:1901360	GO:1901363	GO:1902494	GO:1990904
BMK_Unigene_067621	GO:0005504	GO:0009627
BMK_Unigene_067633	GO:0004298	GO:0005634	GO:0005737	GO:0006511	GO:0019773
BMK_Unigene_067639	GO:0003676	GO:0008270
BMK_Unigene_067654	GO:0016491
BMK_Unigene_067677	GO:0009506	GO:0019722
BMK_Unigene_067678	GO:0016021
BMK_Unigene_067681	GO:0016491
BMK_Unigene_067682	GO:0016491
BMK_Unigene_067687	GO:0003723	GO:0003735	GO:0006412	GO:0015935
BMK_Unigene_067692	GO:0016021
BMK_Unigene_067702	GO:0006869
BMK_Unigene_067717	GO:0006457
BMK_Unigene_067718	GO:0005507
BMK_Unigene_067732	GO:0016021
BMK_Unigene_067744	GO:0030001	GO:0046872
BMK_Unigene_067745	GO:0004364
BMK_Unigene_067747	GO:0003676	GO:0004386	GO:0005524
BMK_Unigene_067754	GO:0006633	GO:0009507	GO:0016790
BMK_Unigene_067757	GO:0003824
BMK_Unigene_067765	GO:0008270	GO:0016491
BMK_Unigene_067778	GO:0006629
BMK_Unigene_067796	GO:0046872
BMK_Unigene_067808	GO:0003723	GO:0022625	GO:0042254
BMK_Unigene_067809	GO:0005216	GO:0006811	GO:0016020	GO:0016021	GO:0055085
BMK_Unigene_067816	GO:0016021
BMK_Unigene_067822	GO:0006629	GO:0008970
BMK_Unigene_067828	GO:0003735	GO:0006412	GO:0015934
BMK_Unigene_067853	GO:0003735	GO:0005840	GO:0006412
BMK_Unigene_067855	GO:0008540	GO:0016021	GO:0030234	GO:0042176
BMK_Unigene_067857	GO:0016021
BMK_Unigene_067861	GO:0005509
BMK_Unigene_067868	GO:0016021
BMK_Unigene_067869	GO:0003735	GO:0005840	GO:0006412
BMK_Unigene_067875	GO:0016787
BMK_Unigene_067878	GO:0016491	GO:0071949
BMK_Unigene_067884	GO:0005388	GO:0005516	GO:0005524	GO:0016021	GO:0016787
BMK_Unigene_067898	GO:0005634	GO:0005737	GO:0043248
BMK_Unigene_067911	GO:0009579
BMK_Unigene_067914	GO:0003676	GO:0004190	GO:0004523
BMK_Unigene_067917	GO:0016021	GO:0042721	GO:0045039
BMK_Unigene_067920	GO:0003723
BMK_Unigene_067927	GO:0005524	GO:0009535	GO:0015986	GO:0045261	GO:0046933
BMK_Unigene_067928	GO:0005524	GO:0009507	GO:0015986	GO:0045261	GO:0046933
BMK_Unigene_067936	GO:0004497	GO:0005506	GO:0016021	GO:0016705	GO:0020037
BMK_Unigene_067944	GO:0046983
BMK_Unigene_067953	GO:0000428	GO:0000988	GO:0000989	GO:0001067	GO:0001076	GO:0001129	GO:0001132	GO:0003674	GO:0003676	GO:0003677	GO:0003682	GO:0005488	GO:0005575	GO:0005622	GO:0005623	GO:0005634	GO:0005654	GO:0005667	GO:0005669	GO:0005911	GO:0006139	GO:0006351	GO:0006352	GO:0006355	GO:0006357	GO:0006366	GO:0006367	GO:0006725	GO:0006807	GO:0008150	GO:0008152	GO:0009058	GO:0009059	GO:0009506	GO:0009889	GO:0009891	GO:0009893	GO:0009987	GO:0010467	GO:0010468	GO:0010556	GO:0010557	GO:0010604	GO:0010628	GO:0016043	GO:0016070	GO:0016591	GO:0018130	GO:0019219
BMK_Unigene_067959	GO:0005504	GO:0009627
BMK_Unigene_067963	GO:0046983	GO:0071339	GO:0090575
BMK_Unigene_067973	GO:0016021	GO:0016192
BMK_Unigene_067976	GO:0003677	GO:0042025
BMK_Unigene_067983	GO:0004864	GO:0005634	GO:0005737	GO:0009738	GO:0010427	GO:0038023	GO:0080163
BMK_Unigene_068001	GO:0016491
BMK_Unigene_068007	GO:0016021
BMK_Unigene_068010	GO:0003700	GO:0005634	GO:0043565
BMK_Unigene_068014	GO:0030001	GO:0046872
BMK_Unigene_068018	GO:0008150	GO:0009888	GO:0010073	GO:0032501	GO:0032502	GO:0048507	GO:0048856
BMK_Unigene_068027	GO:0003735	GO:0006412	GO:0015935
BMK_Unigene_068028	GO:0016021
BMK_Unigene_068030	GO:0006952	GO:0043531
BMK_Unigene_068031	GO:0003735	GO:0005840	GO:0006412
BMK_Unigene_068035	GO:0008168	GO:0016021	GO:0032259
BMK_Unigene_068038	GO:0003755
BMK_Unigene_068040	GO:0005886	GO:0006820	GO:0008381	GO:0016021	GO:0050982
BMK_Unigene_068052	GO:0003674	GO:0005096	GO:0005488	GO:0005543	GO:0005575	GO:0005622	GO:0005623	GO:0005634	GO:0005737	GO:0005773	GO:0005794	GO:0005886	GO:0006810	GO:0006886	GO:0007275	GO:0008047	GO:0008104	GO:0008150	GO:0008289	GO:0009555	GO:0009787	GO:0009789	GO:0009966	GO:0009967	GO:0010646	GO:0010647	GO:0012505	GO:0015031	GO:0015833	GO:0016020	GO:0023051	GO:0023056	GO:0030234	GO:0030695	GO:0032501	GO:0032502	GO:0033036	GO:0034613	GO:0042886	GO:0043085	GO:0043087	GO:0043167	GO:0043168	GO:0043226	GO:0043227	GO:0043229	GO:0043231	GO:0043547	GO:0044093
BMK_Unigene_068063	GO:0032875
BMK_Unigene_068071	GO:0004084	GO:0005829	GO:0009082
BMK_Unigene_068074	GO:0016021
BMK_Unigene_068081	GO:0003676	GO:0008270
BMK_Unigene_068088	GO:0003674	GO:0005488	GO:0005575	GO:0005623	GO:0005886	GO:0006810	GO:0006869	GO:0007275	GO:0008150	GO:0008289	GO:0010876	GO:0016020	GO:0031224	GO:0031225	GO:0031226	GO:0032501	GO:0032502	GO:0033036	GO:0042335	GO:0044425	GO:0044459	GO:0044464	GO:0046658	GO:0048856	GO:0051179	GO:0051234	GO:0071702	GO:0071944
BMK_Unigene_068095	GO:0016021	GO:0045158	GO:0051537
BMK_Unigene_068103	GO:0004550	GO:0005524	GO:0006183	GO:0006228	GO:0006241
BMK_Unigene_068104	GO:0016021
BMK_Unigene_068111	GO:0003735	GO:0005840	GO:0006412
BMK_Unigene_068126	GO:0000062
BMK_Unigene_068131	GO:0005634	GO:0009649	GO:0009909	GO:0010017	GO:0010114	GO:0042753	GO:0042803	GO:0048573	GO:0080167
BMK_Unigene_068133	GO:0004190	GO:0006508	GO:0030163
BMK_Unigene_068138	GO:0016021
BMK_Unigene_068145	GO:0005634	GO:0006355	GO:0043565	GO:0046982
BMK_Unigene_068149	GO:0000079	GO:0001673	GO:0001932	GO:0001933	GO:0003674	GO:0004857	GO:0004860	GO:0004861	GO:0005575	GO:0005622	GO:0005623	GO:0005634	GO:0006469	GO:0007050	GO:0008150	GO:0009892	GO:0010563	GO:0010605	GO:0016301	GO:0016538	GO:0019207	GO:0019210	GO:0019220	GO:0019222	GO:0019887	GO:0030234	GO:0030291	GO:0031323	GO:0031324	GO:0031399	GO:0031400	GO:0032268	GO:0032269	GO:0033673	GO:0042325	GO:0042326	GO:0043073	GO:0043086	GO:0043226	GO:0043227	GO:0043229	GO:0043231	GO:0043549	GO:0044092	GO:0044424	GO:0044464	GO:0045736	GO:0045786	GO:0045859
BMK_Unigene_068157	GO:0009733
BMK_Unigene_068159	GO:0016787
BMK_Unigene_068161	GO:0005575	GO:0005576	GO:0016021	GO:0016787
BMK_Unigene_068168	GO:0005750	GO:0006122
BMK_Unigene_068182	GO:0004721	GO:0016021
BMK_Unigene_068184	GO:0003674	GO:0003824	GO:0006082	GO:0006629	GO:0006631	GO:0006690	GO:0008150	GO:0008152	GO:0008374	GO:0009987	GO:0010327	GO:0010597	GO:0016407	GO:0016413	GO:0016740	GO:0016746	GO:0016747	GO:0019372	GO:0019752	GO:0032787	GO:0043436	GO:0044237	GO:0044238	GO:0044255	GO:0044281	GO:0071704	GO:1901568
BMK_Unigene_068185	GO:0016021	GO:0022857
BMK_Unigene_068186	GO:0005515
BMK_Unigene_068187	GO:0006869
BMK_Unigene_068208	GO:0005739	GO:0016021
BMK_Unigene_068211	GO:0003676
BMK_Unigene_068218	GO:0016021	GO:0022857
BMK_Unigene_068219	GO:0016021
BMK_Unigene_068228	GO:0046872	GO:0051213
BMK_Unigene_068229	GO:0006952	GO:0043531
BMK_Unigene_068234	GO:0046872	GO:0051213
BMK_Unigene_068246	GO:0008080
BMK_Unigene_068248	GO:0016021
BMK_Unigene_068254	GO:0004857
BMK_Unigene_068257	GO:0003677	GO:0003700	GO:0005634
BMK_Unigene_068258	GO:0004563	GO:0005975	GO:0006869	GO:0008289	GO:0102148
BMK_Unigene_068266	GO:0003723
BMK_Unigene_068276	GO:0003824	GO:0009116
BMK_Unigene_068283	GO:0005524	GO:0005737	GO:0005856
BMK_Unigene_068289	GO:0003677	GO:0005634
BMK_Unigene_068293	GO:0005634	GO:0006355	GO:0043565
BMK_Unigene_068296	GO:0003677	GO:0003700	GO:0005634
BMK_Unigene_068305	GO:0004497	GO:0005506	GO:0016021	GO:0016705	GO:0016787	GO:0020037
BMK_Unigene_068310	GO:0005347	GO:0016021
BMK_Unigene_068319	GO:0005783	GO:0005794	GO:0005886
BMK_Unigene_068345	GO:0005524	GO:0008233
BMK_Unigene_068349	GO:0003674	GO:0003676	GO:0003774	GO:0003777	GO:0003824	GO:0004523	GO:0005575	GO:0005622	GO:0005623	GO:0005737	GO:0005739	GO:0005856	GO:0005871	GO:0005875	GO:0006091	GO:0006928	GO:0007017	GO:0007018	GO:0007275	GO:0008150	GO:0008152	GO:0008270	GO:0009060	GO:0009791	GO:0009845	GO:0009987	GO:0015630	GO:0015980	GO:0016462	GO:0016787	GO:0016817	GO:0016818	GO:0016887	GO:0017111	GO:0032501	GO:0032502	GO:0032991	GO:0043226	GO:0043227	GO:0043228	GO:0043229	GO:0043231	GO:0043232	GO:0044237	GO:0044422	GO:0044424	GO:0044430	GO:0044444	GO:0044446
BMK_Unigene_068350	GO:0015267	GO:0016021
BMK_Unigene_068354	GO:0004672	GO:0005524	GO:0016021	GO:0030246
BMK_Unigene_068365	GO:0016021
BMK_Unigene_068376	GO:0005575	GO:0005622	GO:0005623	GO:0005737	GO:0009507	GO:0009534	GO:0009535	GO:0009536	GO:0009543	GO:0009579	GO:0016020	GO:0031976	GO:0031977	GO:0031978	GO:0031984	GO:0034357	GO:0042651	GO:0043226	GO:0043227	GO:0043229	GO:0043231	GO:0044422	GO:0044424	GO:0044434	GO:0044435	GO:0044436	GO:0044444	GO:0044446	GO:0044464	GO:0055035
BMK_Unigene_068381	GO:0003676
BMK_Unigene_068384	GO:0016021
BMK_Unigene_068386	GO:0016491
BMK_Unigene_068388	GO:0016021
BMK_Unigene_068389	GO:0004180
BMK_Unigene_068391	GO:0006457	GO:0016272	GO:0051082
BMK_Unigene_068393	GO:0003677	GO:0005634
BMK_Unigene_068395	GO:0003677	GO:0005634
BMK_Unigene_068399	GO:0005576	GO:0006030	GO:0008061
BMK_Unigene_068405	GO:0004601	GO:0005576	GO:0006979	GO:0009505	GO:0009506	GO:0020037	GO:0042744	GO:0046872
BMK_Unigene_068406	GO:0004553	GO:0005975
BMK_Unigene_068407	GO:0005515	GO:0005575	GO:0005622	GO:0005623	GO:0005737	GO:0005829	GO:0005886	GO:0006464	GO:0006508	GO:0006511	GO:0006807	GO:0008150	GO:0008152	GO:0009056	GO:0009057	GO:0009058	GO:0009692	GO:0009693	GO:0009719	GO:0009725	GO:0009733	GO:0009987	GO:0010033	GO:0010817	GO:0016020	GO:0019538	GO:0019941	GO:0030163	GO:0032446	GO:0036211	GO:0042221	GO:0042445	GO:0042446	GO:0043170	GO:0043412	GO:0043449	GO:0043450	GO:0043632	GO:0044237	GO:0044238	GO:0044248	GO:0044249	GO:0044257	GO:0044260	GO:0044265	GO:0044267	GO:0044424	GO:0044444	GO:0044464
BMK_Unigene_068416	GO:0005840
BMK_Unigene_068418	GO:0003735	GO:0005840	GO:0006412
BMK_Unigene_068433	GO:0005634	GO:0006355	GO:0030015	GO:0042025
BMK_Unigene_068437	GO:0016554
BMK_Unigene_068440	GO:0008234
BMK_Unigene_068452	GO:0006486	GO:0016757
BMK_Unigene_068456	GO:0003677	GO:0005634	GO:0046983
BMK_Unigene_068458	GO:0003677	GO:0003700	GO:0005634
BMK_Unigene_068460	GO:0000154	GO:0001510	GO:0005575	GO:0005622	GO:0005623	GO:0005737	GO:0005829	GO:0006139	GO:0006364	GO:0006396	GO:0006399	GO:0006400	GO:0006464	GO:0006479	GO:0006725	GO:0006807	GO:0008033	GO:0008150	GO:0008152	GO:0008213	GO:0009451	GO:0009987	GO:0010467	GO:0016070	GO:0016072	GO:0018364	GO:0019538	GO:0022613	GO:0030488	GO:0031167	GO:0032259	GO:0032501	GO:0032502	GO:0034470	GO:0034641	GO:0034660	GO:0035265	GO:0036211	GO:0036265	GO:0040007	GO:0042127	GO:0042254	GO:0043170	GO:0043412	GO:0043414	GO:0044085	GO:0044237	GO:0044238	GO:0044260
BMK_Unigene_068474	GO:0006869	GO:0008289	GO:0016021
BMK_Unigene_068479	GO:0016021
BMK_Unigene_068482	GO:0004565	GO:0005975	GO:0030246
BMK_Unigene_068490	GO:0046872
BMK_Unigene_068491	GO:0004675	GO:0005886	GO:0006468
BMK_Unigene_068495	GO:0000375	GO:0000377	GO:0000398	GO:0003676	GO:0003723	GO:0005575	GO:0005622	GO:0005623	GO:0005634	GO:0005654	GO:0005681	GO:0005689	GO:0006139	GO:0006396	GO:0006397	GO:0006725	GO:0006807	GO:0008150	GO:0008152	GO:0008380	GO:0009987	GO:0010467	GO:0016070	GO:0016071	GO:0031974	GO:0031981	GO:0032991	GO:0034641	GO:0043170	GO:0043226	GO:0043227	GO:0043229	GO:0043231	GO:0043233	GO:0044237	GO:0044238	GO:0044422	GO:0044424	GO:0044428	GO:0044446	GO:0044464	GO:0046483	GO:0070013	GO:0071704	GO:0090304	GO:1901360	GO:1990904
BMK_Unigene_068507	GO:0005575	GO:0005618	GO:0005623	GO:0008150	GO:0009664	GO:0009987	GO:0016043	GO:0030312	GO:0044464	GO:0045229	GO:0071554	GO:0071555	GO:0071669	GO:0071840	GO:0071944
BMK_Unigene_068513	GO:0003723	GO:0004525	GO:0006396
BMK_Unigene_068517	GO:0003723	GO:0003735	GO:0005840	GO:0006412
BMK_Unigene_068521	GO:0016021
BMK_Unigene_068527	GO:0004144	GO:0045017	GO:0047196	GO:0102966
BMK_Unigene_068531	GO:0007165	GO:0010266	GO:0016049	GO:0019904	GO:0046982	GO:0051117	GO:0090378
BMK_Unigene_068536	GO:0005523	GO:0051694
BMK_Unigene_068539	GO:0008194
BMK_Unigene_068554	GO:0003735	GO:0004672	GO:0005524	GO:0005840	GO:0006412
BMK_Unigene_068566	GO:0043531
BMK_Unigene_068567	GO:0000981	GO:0000988	GO:0000989	GO:0001067	GO:0001076	GO:0001101	GO:0001134	GO:0001135	GO:0003674	GO:0003676	GO:0003677	GO:0003700	GO:0005488	GO:0005575	GO:0005622	GO:0005623	GO:0005634	GO:0006355	GO:0006357	GO:0006950	GO:0006952	GO:0006970	GO:0008150	GO:0009414	GO:0009415	GO:0009605	GO:0009607	GO:0009617	GO:0009620	GO:0009628	GO:0009651	GO:0009719	GO:0009723	GO:0009725	GO:0009733	GO:0009737	GO:0009739	GO:0009751	GO:0009753	GO:0009889	GO:0009966	GO:0009967	GO:0009987	GO:0010033	GO:0010035	GO:0010038	GO:0010200	GO:0010243	GO:0010468
BMK_Unigene_068571	GO:0003674	GO:0003676	GO:0003700	GO:0005575	GO:0005622	GO:0005623	GO:0005634	GO:0006355	GO:0008150	GO:0009268	GO:0009628	GO:0009889	GO:0010035	GO:0010038	GO:0010044	GO:0010447	GO:0010468	GO:0010556	GO:0019219	GO:0019222	GO:0031323	GO:0031326	GO:0042221	GO:0043226	GO:0043227	GO:0043229	GO:0043231	GO:0044424	GO:0044464	GO:0050789	GO:0050794	GO:0050896	GO:0051171	GO:0051252	GO:0060255	GO:0065007	GO:0080090	GO:0140110	GO:1903506	GO:2000112	GO:2001141
BMK_Unigene_068573	GO:0003674	GO:0003824	GO:0005575	GO:0005622	GO:0005623	GO:0005737	GO:0005829	GO:0006725	GO:0006950	GO:0007623	GO:0008150	GO:0008152	GO:0009058	GO:0009266	GO:0009409	GO:0009628	GO:0009698	GO:0009699	GO:0009808	GO:0009809	GO:0009987	GO:0016491	GO:0016620	GO:0016621	GO:0016903	GO:0019438	GO:0019748	GO:0042752	GO:0042754	GO:0044237	GO:0044249	GO:0044424	GO:0044444	GO:0044464	GO:0044550	GO:0048511	GO:0048519	GO:0050789	GO:0050896	GO:0055114	GO:0065007	GO:0071704	GO:1901360	GO:1901362	GO:1901576
BMK_Unigene_068578	GO:0006306	GO:0008168
BMK_Unigene_068583	GO:0002682	GO:0002684	GO:0002831	GO:0002833	GO:0003674	GO:0005096	GO:0005488	GO:0005543	GO:0005575	GO:0005622	GO:0005623	GO:0005634	GO:0005737	GO:0005829	GO:0005886	GO:0006950	GO:0006970	GO:0008047	GO:0008150	GO:0008289	GO:0009611	GO:0009628	GO:0009651	GO:0009787	GO:0009789	GO:0009966	GO:0009967	GO:0010646	GO:0010647	GO:0016020	GO:0023051	GO:0023056	GO:0030234	GO:0030695	GO:0031347	GO:0031349	GO:0032101	GO:0032103	GO:0043085	GO:0043087	GO:0043167	GO:0043168	GO:0043226	GO:0043227	GO:0043229	GO:0043231	GO:0043547	GO:0043900	GO:0043902
BMK_Unigene_068584	GO:0003674	GO:0003824	GO:0005575	GO:0005622	GO:0005623	GO:0005737	GO:0006464	GO:0006807	GO:0008150	GO:0008152	GO:0009987	GO:0016740	GO:0019538	GO:0019787	GO:0032446	GO:0036211	GO:0043170	GO:0043412	GO:0044237	GO:0044238	GO:0044260	GO:0044267	GO:0044424	GO:0044464	GO:0070647	GO:0071568	GO:0071569	GO:0071704	GO:0140096	GO:1901564	GO:1990564	GO:1990592
BMK_Unigene_068587	GO:0016787
BMK_Unigene_068589	GO:0003700	GO:0005634	GO:0043565
BMK_Unigene_068590	GO:0003676	GO:0003723
BMK_Unigene_068591	GO:0003723	GO:0003735	GO:0006412	GO:0015935
BMK_Unigene_068592	GO:0004525	GO:0006396
BMK_Unigene_068593	GO:0003674	GO:0003824	GO:0005215	GO:0005488	GO:0005507	GO:0005575	GO:0005622	GO:0005623	GO:0005737	GO:0005829	GO:0006082	GO:0006518	GO:0006725	GO:0006790	GO:0006807	GO:0006810	GO:0006811	GO:0006812	GO:0006820	GO:0006950	GO:0006952	GO:0008150	GO:0008152	GO:0008324	GO:0008490	GO:0008509	GO:0009056	GO:0009058	GO:0009605	GO:0009607	GO:0009617	GO:0009987	GO:0010035	GO:0010038	GO:0015075	GO:0015103	GO:0015105	GO:0015291	GO:0015318	GO:0015399	GO:0015405	GO:0015446	GO:0015698	GO:0015700	GO:0016043	GO:0016143	GO:0016145	GO:0016462	GO:0016740
BMK_Unigene_068595	GO:0015297	GO:0016021	GO:0042910
BMK_Unigene_068596	GO:0016592
BMK_Unigene_068598	GO:0002376	GO:0005575	GO:0005623	GO:0005886	GO:0006950	GO:0006952	GO:0006955	GO:0007154	GO:0007165	GO:0008150	GO:0008219	GO:0009626	GO:0009987	GO:0012501	GO:0016020	GO:0023052	GO:0033554	GO:0034050	GO:0043531	GO:0044464	GO:0045087	GO:0050789	GO:0050794	GO:0050896	GO:0051716	GO:0065007	GO:0071944
BMK_Unigene_068603	GO:0004553	GO:0005975
BMK_Unigene_068607	GO:0048046
BMK_Unigene_068609	GO:0000139	GO:0006890	GO:0015031	GO:0030126
BMK_Unigene_068613	GO:0005575	GO:0005576	GO:0005618	GO:0005622	GO:0005623	GO:0005737	GO:0005773	GO:0005774	GO:0005794	GO:0005829	GO:0006810	GO:0006833	GO:0008150	GO:0009505	GO:0012505	GO:0016020	GO:0030312	GO:0031090	GO:0042044	GO:0043226	GO:0043227	GO:0043229	GO:0043231	GO:0044422	GO:0044424	GO:0044437	GO:0044444	GO:0044446	GO:0044464	GO:0048046	GO:0051179	GO:0051234	GO:0071944	GO:0098588	GO:0098805
BMK_Unigene_068614	GO:0016021
BMK_Unigene_068625	GO:0005829	GO:0006281	GO:0009555	GO:0016607	GO:0033045	GO:0043007	GO:2000042
BMK_Unigene_068630	GO:0046983
BMK_Unigene_068643	GO:0008610
BMK_Unigene_068653	GO:0004601	GO:0005576	GO:0006979	GO:0020037	GO:0042744	GO:0046872
BMK_Unigene_068655	GO:0003735	GO:0005840	GO:0006412
BMK_Unigene_068656	GO:0003735	GO:0005840	GO:0006412
BMK_Unigene_068657	GO:0016757
BMK_Unigene_068659	GO:0003677	GO:0008270
BMK_Unigene_068665	GO:0004675	GO:0005524	GO:0005886	GO:0006468
BMK_Unigene_068666	GO:0035556
BMK_Unigene_068669	GO:0016021
BMK_Unigene_068673	GO:0000166	GO:0003824	GO:0044237
BMK_Unigene_068675	GO:0016021
BMK_Unigene_068678	GO:0006904
BMK_Unigene_068684	GO:0006869	GO:0008289
BMK_Unigene_068686	GO:0007049	GO:0016538	GO:0051301
BMK_Unigene_068690	GO:0005634	GO:0043565	GO:0045893
BMK_Unigene_068691	GO:0006952
BMK_Unigene_068697	GO:0004864	GO:0009966
BMK_Unigene_068698	GO:0009733
BMK_Unigene_068700	GO:0006869	GO:0008289	GO:0016021
BMK_Unigene_068702	GO:0005509	GO:0005783	GO:0006457	GO:0006633	GO:0051082
BMK_Unigene_068704	GO:0006355	GO:0046983
BMK_Unigene_068710	GO:0003674	GO:0003676	GO:0003723	GO:0003729	GO:0005488	GO:0005515	GO:0005575	GO:0005622	GO:0005623	GO:0005634	GO:0043226	GO:0043227	GO:0043229	GO:0043231	GO:0044424	GO:0044464	GO:0097159	GO:1901363
BMK_Unigene_068712	GO:0003755	GO:0006457
BMK_Unigene_068725	GO:0003723	GO:0006396
BMK_Unigene_068727	GO:0000003	GO:0001101	GO:0001558	GO:0001666	GO:0003002	GO:0003006	GO:0005975	GO:0005976	GO:0006355	GO:0006950	GO:0006974	GO:0006979	GO:0007275	GO:0007389	GO:0008150	GO:0008152	GO:0009414	GO:0009415	GO:0009605	GO:0009607	GO:0009611	GO:0009617	GO:0009620	GO:0009624	GO:0009628	GO:0009636	GO:0009719	GO:0009725	GO:0009733	GO:0009791	GO:0009798	GO:0009845	GO:0009888	GO:0009889	GO:0009890	GO:0009892	GO:0009909	GO:0009943	GO:0009944	GO:0009955	GO:0009987	GO:0010033	GO:0010035	GO:0010038	GO:0010073	GO:0010154	GO:0010191	GO:0010214	GO:0010243
BMK_Unigene_068733	GO:0004672	GO:0005509	GO:0005524
BMK_Unigene_068734	GO:0008271	GO:0016021
BMK_Unigene_068739	GO:0003755	GO:0006457
BMK_Unigene_068752	GO:0016021
BMK_Unigene_068758	GO:0016730	GO:0046872	GO:0051539	GO:0103012
BMK_Unigene_068759	GO:0002376	GO:0003674	GO:0003824	GO:0004672	GO:0004674	GO:0004675	GO:0004888	GO:0005488	GO:0005515	GO:0005524	GO:0005575	GO:0005622	GO:0005623	GO:0005634	GO:0005737	GO:0005829	GO:0005886	GO:0006464	GO:0006468	GO:0006793	GO:0006796	GO:0006807	GO:0006950	GO:0006952	GO:0006955	GO:0007154	GO:0007165	GO:0007166	GO:0007167	GO:0007178	GO:0008150	GO:0008152	GO:0009605	GO:0009607	GO:0009608	GO:0009610	GO:0009620	GO:0009623	GO:0009719	GO:0009723	GO:0009725	GO:0009814	GO:0009987	GO:0010033	GO:0012505	GO:0016020	GO:0016301	GO:0016310	GO:0016740
BMK_Unigene_068760	GO:0016787
BMK_Unigene_068771	GO:0016021
BMK_Unigene_068773	GO:0007034
BMK_Unigene_068778	GO:0005347	GO:0016021
BMK_Unigene_068781	GO:0003676
BMK_Unigene_068791	GO:0005525
BMK_Unigene_068794	GO:0005576
BMK_Unigene_068806	GO:0003677
BMK_Unigene_068813	GO:0007034
BMK_Unigene_068814	GO:0003677	GO:0003700	GO:0016602
BMK_Unigene_068823	GO:0004197	GO:0050790
BMK_Unigene_068824	GO:0005576
BMK_Unigene_068838	GO:0003735	GO:0005840	GO:0006412
BMK_Unigene_068839	GO:0016021
BMK_Unigene_068840	GO:0000427	GO:0042793
BMK_Unigene_068847	GO:0009055
BMK_Unigene_068850	GO:0003735	GO:0006412	GO:0022625
BMK_Unigene_068853	GO:0004420	GO:0005789	GO:0008299	GO:0015936
BMK_Unigene_068854	GO:0005669	GO:0006367
BMK_Unigene_068855	GO:0046983
BMK_Unigene_068866	GO:0006792	GO:0010438	GO:0010439
BMK_Unigene_068873	GO:0005634	GO:0006997
BMK_Unigene_068878	GO:0016491
BMK_Unigene_068880	GO:0005515
BMK_Unigene_068885	GO:0005509	GO:0009654	GO:0015979	GO:0019898
BMK_Unigene_068897	GO:0055114
BMK_Unigene_068904	GO:0003735	GO:0004672	GO:0005524	GO:0005840	GO:0006412
BMK_Unigene_068917	GO:0002376	GO:0005575	GO:0005623	GO:0005886	GO:0006950	GO:0006952	GO:0006955	GO:0007154	GO:0007165	GO:0008150	GO:0008219	GO:0009626	GO:0009987	GO:0012501	GO:0016020	GO:0023052	GO:0033554	GO:0034050	GO:0044464	GO:0045087	GO:0050789	GO:0050794	GO:0050896	GO:0051716	GO:0065007	GO:0071944
BMK_Unigene_068923	GO:0030410	GO:0030418
BMK_Unigene_068927	GO:0000981	GO:0000988	GO:0000989	GO:0001067	GO:0001076	GO:0001134	GO:0001135	GO:0003674	GO:0003676	GO:0003677	GO:0003700	GO:0005488	GO:0005575	GO:0005622	GO:0005623	GO:0005634	GO:0006355	GO:0006357	GO:0008150	GO:0009888	GO:0009889	GO:0009891	GO:0009893	GO:0009987	GO:0010026	GO:0010468	GO:0010556	GO:0010557	GO:0010604	GO:0010628	GO:0019219	GO:0019222	GO:0030154	GO:0031323	GO:0031325	GO:0031326	GO:0031328	GO:0032502	GO:0043226	GO:0043227	GO:0043229	GO:0043231	GO:0043565	GO:0044212	GO:0044424	GO:0044464	GO:0045893	GO:0045935	GO:0048518
BMK_Unigene_068928	GO:0003735	GO:0005840	GO:0006414
BMK_Unigene_068937	GO:0000977	GO:0003700	GO:0005634	GO:0045944	GO:0046983
BMK_Unigene_068942	GO:0046983
BMK_Unigene_068945	GO:0003677	GO:0003700	GO:0016602
BMK_Unigene_068948	GO:0005525
BMK_Unigene_068956	GO:0008428	GO:0008948	GO:0016021	GO:0046872	GO:0047443	GO:0051252
BMK_Unigene_068957	GO:0016021
BMK_Unigene_068959	GO:0003924	GO:0005525
BMK_Unigene_068960	GO:0003723	GO:0003735	GO:0006412	GO:0015934
BMK_Unigene_068965	GO:0000502
BMK_Unigene_068966	GO:0003723	GO:0004252
BMK_Unigene_068969	GO:0016491	GO:0016616
BMK_Unigene_068970	GO:0003824
BMK_Unigene_068974	GO:0005737	GO:0006914	GO:0016021
BMK_Unigene_068982	GO:0004497	GO:0005506	GO:0016705	GO:0020037
BMK_Unigene_068985	GO:0004674	GO:0005524
BMK_Unigene_068989	GO:0030001	GO:0046872
BMK_Unigene_068991	GO:0003677
BMK_Unigene_068996	GO:0016491
BMK_Unigene_068998	GO:0005507	GO:0009055	GO:0009535
BMK_Unigene_069012	GO:0016021
BMK_Unigene_069027	GO:0005634	GO:0010099
BMK_Unigene_069030	GO:0005344	GO:0019825	GO:0020037	GO:0046872
BMK_Unigene_069035	GO:0016874
BMK_Unigene_069041	GO:0004672	GO:0005515	GO:0005524	GO:0005576
BMK_Unigene_069043	GO:0003674	GO:0005102	GO:0005179	GO:0005488	GO:0005515	GO:0005575	GO:0005576	GO:0005911	GO:0007154	GO:0007165	GO:0007267	GO:0008150	GO:0009506	GO:0009966	GO:0009987	GO:0010469	GO:0010646	GO:0019722	GO:0019932	GO:0023051	GO:0023052	GO:0030054	GO:0030545	GO:0035556	GO:0048018	GO:0048046	GO:0048583	GO:0050789	GO:0050794	GO:0050896	GO:0051716	GO:0055044	GO:0065007	GO:0065009	GO:0098772
BMK_Unigene_069047	GO:0003674	GO:0003824	GO:0004842	GO:0005575	GO:0005622	GO:0005623	GO:0005634	GO:0005737	GO:0006464	GO:0006511	GO:0006807	GO:0007275	GO:0008150	GO:0008152	GO:0009987	GO:0016567	GO:0016740	GO:0019538	GO:0019787	GO:0032446	GO:0036211	GO:0043170	GO:0043226	GO:0043227	GO:0043229	GO:0043231	GO:0043412	GO:0044237	GO:0044238	GO:0044260	GO:0044267	GO:0044424	GO:0044464	GO:0048519	GO:0048583	GO:0048585	GO:0050789	GO:0061630	GO:0061659	GO:0065007	GO:0070647	GO:0071704	GO:0080134	GO:0080148	GO:0140096	GO:1901564	GO:2000070
BMK_Unigene_069054	GO:0016021
BMK_Unigene_069055	GO:0006952
BMK_Unigene_069056	GO:0003755	GO:0006457
BMK_Unigene_069057	GO:0000302	GO:0001101	GO:0002831	GO:0005575	GO:0005622	GO:0005623	GO:0005634	GO:0005737	GO:0005739	GO:0005829	GO:0006950	GO:0006970	GO:0006979	GO:0007154	GO:0007275	GO:0007568	GO:0008150	GO:0009266	GO:0009314	GO:0009409	GO:0009414	GO:0009415	GO:0009416	GO:0009605	GO:0009607	GO:0009611	GO:0009620	GO:0009625	GO:0009628	GO:0009636	GO:0009642	GO:0009646	GO:0009651	GO:0009719	GO:0009723	GO:0009725	GO:0009737	GO:0009987	GO:0009991	GO:0010033	GO:0010035	GO:0010150	GO:0022622	GO:0031347	GO:0031668	GO:0032101	GO:0032501	GO:0032502	GO:0033554
BMK_Unigene_069058	GO:0016021
BMK_Unigene_069068	GO:0005515
BMK_Unigene_069074	GO:0006952
BMK_Unigene_069080	GO:0009538	GO:0015979
BMK_Unigene_069085	GO:0003712	GO:0006357	GO:0016592
BMK_Unigene_069089	GO:0006355	GO:0042393	GO:0046872
BMK_Unigene_069095	GO:0015297	GO:0016021	GO:0042910
BMK_Unigene_069096	GO:0046983
BMK_Unigene_069104	GO:0004298	GO:0005634	GO:0005737	GO:0005839	GO:0051603
BMK_Unigene_069107	GO:0008150	GO:0009314	GO:0009416	GO:0009628	GO:0009719	GO:0009725	GO:0009733	GO:0010033	GO:0042221	GO:0050896
BMK_Unigene_069114	GO:0006511
BMK_Unigene_069118	GO:0004176	GO:0004252	GO:0006515	GO:0009368	GO:0051117
BMK_Unigene_069120	GO:0003700	GO:0005634	GO:0043565
BMK_Unigene_069137	GO:0003677	GO:0005634
BMK_Unigene_069138	GO:0005634
BMK_Unigene_069149	GO:0004674	GO:0005524	GO:0016021
BMK_Unigene_069153	GO:0003978	GO:0006012	GO:0016021
BMK_Unigene_069154	GO:0016021
BMK_Unigene_069156	GO:0004497	GO:0005506	GO:0016705	GO:0020037
BMK_Unigene_069157	GO:0003723	GO:0003735	GO:0005840	GO:0006412
BMK_Unigene_069158	GO:0016787
BMK_Unigene_069169	GO:0003700
BMK_Unigene_069172	GO:0008150	GO:0009314	GO:0009416	GO:0009628	GO:0009719	GO:0009725	GO:0009733	GO:0010033	GO:0042221	GO:0050896
BMK_Unigene_069175	GO:0008236	GO:0016021
BMK_Unigene_069179	GO:0007165	GO:0043531
BMK_Unigene_069183	GO:0016021	GO:0022857
BMK_Unigene_069184	GO:0006508	GO:0008234
BMK_Unigene_069187	GO:0016021
BMK_Unigene_069189	GO:0016021
BMK_Unigene_069193	GO:0000977	GO:0003700	GO:0005634	GO:0045944	GO:0046983
BMK_Unigene_069195	GO:0006952	GO:0043531
BMK_Unigene_069199	GO:0005747	GO:0006979	GO:0008137	GO:0009055
BMK_Unigene_069201	GO:0003924	GO:0005525	GO:0005743	GO:0005759	GO:0006412	GO:0043022	GO:0045727
BMK_Unigene_069205	GO:0016874
BMK_Unigene_069206	GO:0001101	GO:0003674	GO:0003824	GO:0004842	GO:0005575	GO:0005622	GO:0005623	GO:0005634	GO:0005737	GO:0006464	GO:0006807	GO:0006950	GO:0006952	GO:0007154	GO:0007165	GO:0008150	GO:0008152	GO:0009605	GO:0009607	GO:0009611	GO:0009617	GO:0009719	GO:0009725	GO:0009753	GO:0009755	GO:0009867	GO:0009987	GO:0010033	GO:0016567	GO:0016740	GO:0019538	GO:0019787	GO:0023052	GO:0032446	GO:0032870	GO:0036211	GO:0042221	GO:0042742	GO:0043170	GO:0043207	GO:0043226	GO:0043227	GO:0043229	GO:0043231	GO:0043412	GO:0044237	GO:0044238	GO:0044260	GO:0044267
BMK_Unigene_069212	GO:0016021
BMK_Unigene_069215	GO:0005524	GO:0006457	GO:0046914	GO:1901671
BMK_Unigene_069222	GO:0003735	GO:0005840	GO:0006412
BMK_Unigene_069228	GO:0006457
BMK_Unigene_069237	GO:0016021
BMK_Unigene_069244	GO:0003674	GO:0005488	GO:0005515	GO:0005575	GO:0005622	GO:0005623	GO:0005737	GO:0006725	GO:0006778	GO:0006779	GO:0006807	GO:0007154	GO:0007165	GO:0008150	GO:0008152	GO:0009058	GO:0009507	GO:0009536	GO:0009987	GO:0010019	GO:0015994	GO:0015995	GO:0018130	GO:0019438	GO:0019899	GO:0023052	GO:0033013	GO:0033014	GO:0034641	GO:0042440	GO:0043085	GO:0043226	GO:0043227	GO:0043229	GO:0043231	GO:0044093	GO:0044237	GO:0044249	GO:0044271	GO:0044424	GO:0044444	GO:0044464	GO:0046148	GO:0046483	GO:0046906	GO:0050789	GO:0050790	GO:0050794	GO:0050896
BMK_Unigene_069248	GO:0016491	GO:0071949
BMK_Unigene_069252	GO:0046872	GO:0051213
BMK_Unigene_069259	GO:0000209	GO:0005524	GO:0006511	GO:0061631
BMK_Unigene_069261	GO:0016021
BMK_Unigene_069271	GO:0016021	GO:0020037	GO:0046872
BMK_Unigene_069279	GO:0003854	GO:0006694
BMK_Unigene_069282	GO:0005742	GO:0016021	GO:0022626	GO:0045040	GO:0046872
BMK_Unigene_069285	GO:0005886	GO:0016021	GO:0016760	GO:0030244	GO:0046872	GO:0071555
BMK_Unigene_069288	GO:0046872	GO:0051213
BMK_Unigene_069290	GO:0006629	GO:0016298
BMK_Unigene_069292	GO:0000209	GO:0005524	GO:0005634	GO:0006511	GO:0061631
BMK_Unigene_069293	GO:0005524	GO:0016740
BMK_Unigene_069299	GO:0009535	GO:0016021	GO:0048564	GO:0080183
BMK_Unigene_069303	GO:0003743
BMK_Unigene_069317	GO:0016021
BMK_Unigene_069322	GO:0008270	GO:0009086	GO:0032259	GO:0047150
BMK_Unigene_069331	GO:0004864	GO:0006952	GO:0009607	GO:0009738	GO:0010427	GO:0038023
BMK_Unigene_069333	GO:0005524
BMK_Unigene_069337	GO:0004674	GO:0005524	GO:0018105	GO:0035556
BMK_Unigene_069347	GO:0000338	GO:0008180	GO:0010387
BMK_Unigene_069348	GO:0006606	GO:0008536
BMK_Unigene_069352	GO:0005524	GO:0006139	GO:0019205
BMK_Unigene_069357	GO:0016021
BMK_Unigene_069358	GO:0050328	GO:0071949
BMK_Unigene_069359	GO:0016491	GO:0071949
BMK_Unigene_069361	GO:0000209	GO:0005524	GO:0005634	GO:0006511	GO:0061631
BMK_Unigene_069364	GO:0061630
BMK_Unigene_069369	GO:0003674	GO:0005488	GO:0005515	GO:0005575	GO:0005622	GO:0005623	GO:0005737	GO:0005773	GO:0005774	GO:0005794	GO:0005886	GO:0005911	GO:0009506	GO:0012505	GO:0016020	GO:0019899	GO:0019900	GO:0019901	GO:0030054	GO:0031090	GO:0043226	GO:0043227	GO:0043229	GO:0043231	GO:0043424	GO:0044422	GO:0044424	GO:0044437	GO:0044444	GO:0044446	GO:0044464	GO:0055044	GO:0071944	GO:0098588	GO:0098805
BMK_Unigene_069376	GO:0003755	GO:0006457
BMK_Unigene_069380	GO:0005618	GO:0030145	GO:0045735	GO:0048046
BMK_Unigene_069385	GO:0035556
BMK_Unigene_069397	GO:0006457	GO:0016272	GO:0051082
BMK_Unigene_069399	GO:0005198	GO:0006886	GO:0016192	GO:0030130	GO:0030132
BMK_Unigene_069401	GO:0005524	GO:0016021	GO:0016887
BMK_Unigene_069406	GO:0003735	GO:0005840	GO:0006412
BMK_Unigene_069421	GO:0004144	GO:0045017
BMK_Unigene_069422	GO:0004144	GO:0045017
BMK_Unigene_069427	GO:0003674	GO:0003824	GO:0005575	GO:0005622	GO:0005623	GO:0006996	GO:0008150	GO:0008152	GO:0009657	GO:0009662	GO:0009987	GO:0016043	GO:0016117	GO:0016491	GO:0016853	GO:0016859	GO:0044464	GO:0046608	GO:0055114	GO:0071840
BMK_Unigene_069436	GO:0009691	GO:0016787
BMK_Unigene_069438	GO:0005789	GO:0016021
BMK_Unigene_069440	GO:0003677	GO:0008270	GO:0042025
BMK_Unigene_069441	GO:0004427	GO:0009678	GO:0016021
BMK_Unigene_069449	GO:0005545	GO:0030136	GO:0030276	GO:0048268
BMK_Unigene_069452	GO:0003700
BMK_Unigene_069457	GO:0003677	GO:0006357	GO:0046983
BMK_Unigene_069458	GO:0000786	GO:0003677	GO:0005634	GO:0046982
BMK_Unigene_069459	GO:0000159	GO:0007165	GO:0019888
BMK_Unigene_069461	GO:0009733
BMK_Unigene_069465	GO:0000502
BMK_Unigene_069472	GO:0001732	GO:0003743	GO:0005852	GO:0006446	GO:0016282	GO:0033290	GO:0043022
BMK_Unigene_069478	GO:0006012	GO:0047216
BMK_Unigene_069481	GO:0016021
BMK_Unigene_069483	GO:0009415	GO:0046872
BMK_Unigene_069490	GO:0016021
BMK_Unigene_069491	GO:0004601	GO:0005576	GO:0006979	GO:0020037	GO:0042744	GO:0046872
BMK_Unigene_069498	GO:0004568	GO:0005975	GO:0006032	GO:0016998
BMK_Unigene_069504	GO:0016021	GO:0022857
BMK_Unigene_069505	GO:0005515	GO:0016021
BMK_Unigene_069506	GO:0016021
BMK_Unigene_069507	GO:0010005	GO:0043622
BMK_Unigene_069511	GO:0006355	GO:0046983
BMK_Unigene_069515	GO:0005634	GO:0008270	GO:0009909
BMK_Unigene_069516	GO:0046872
BMK_Unigene_069517	GO:0003674	GO:0003700	GO:0006355	GO:0008150	GO:0009889	GO:0010468	GO:0010556	GO:0019219	GO:0019222	GO:0031323	GO:0031326	GO:0050789	GO:0050794	GO:0051171	GO:0051252	GO:0060255	GO:0065007	GO:0080090	GO:0140110	GO:1903506	GO:2000112	GO:2001141
BMK_Unigene_069522	GO:0007165
BMK_Unigene_069542	GO:0003824	GO:0005975	GO:0030246
BMK_Unigene_069553	GO:0004519	GO:0006302	GO:0008408	GO:0030145	GO:0030870	GO:0051321
BMK_Unigene_069567	GO:0003677	GO:0005634
BMK_Unigene_069569	GO:0003677	GO:0005634
BMK_Unigene_069571	GO:0005575	GO:0005622	GO:0005623	GO:0005634	GO:0005737	GO:0006355	GO:0008150	GO:0009507	GO:0009536	GO:0009889	GO:0010468	GO:0010556	GO:0019219	GO:0019222	GO:0031323	GO:0031326	GO:0043226	GO:0043227	GO:0043229	GO:0043231	GO:0044093	GO:0044424	GO:0044444	GO:0044464	GO:0048518	GO:0050789	GO:0050794	GO:0051090	GO:0051091	GO:0051171	GO:0051252	GO:0060255	GO:0065007	GO:0065009	GO:0080090	GO:1903506	GO:2000112	GO:2001141
BMK_Unigene_069576	GO:0006629	GO:0008374
BMK_Unigene_069581	GO:0004553	GO:0005618	GO:0010411	GO:0016762	GO:0042546	GO:0048046	GO:0071555
BMK_Unigene_069586	GO:0003746	GO:0003924	GO:0005525
BMK_Unigene_069587	GO:0005737	GO:0006606	GO:0042025	GO:0061608
BMK_Unigene_069588	GO:0015297	GO:0016021	GO:0042910
BMK_Unigene_069589	GO:0003677	GO:0003700	GO:0005634
[truncated: 21,503 more rows]
[truncated: 206 more columns]
