# Supplementary material
Source: MDPI journal article supplement (https://www.mdpi.com/1999-4907/15/4/618)
Supplement: s1 [file s1 › Supplementary Table S4.xlsx]

## Sheet: Sheet1
Supplementary Table S4:Unigenes were categorized into 137 KEGG pathways
#pathway	pathway_id	Gene_number	Gene_id	KOs
Glycolysis / Gluconeogenesis	ko00010	307	BMK_Unigene_000679;BMK_Unigene_001147;BMK_Unigene_001345;BMK_Unigene_001403;BMK_Unigene_001419;BMK_Unigene_001655;BMK_Unigene_002708;BMK_Unigene_002855;BMK_Unigene_003436;BMK_Unigene_003602;BMK_Unigene_003623;BMK_Unigene_003952;BMK_Unigene_004440;BMK_Unigene_018502;BMK_Unigene_045746;BMK_Unigene_057867;BMK_Unigene_063344;BMK_Unigene_063654;BMK_Unigene_064430;BMK_Unigene_064773;BMK_Unigene_066940;…	K01835+K00128+K01810+K18857+K00128+K03103+K15633+K00128+K01792+K01792+K01810+K01689+K01568+K00873+K00002+K18857+K01623+K00134+K00134+K01623+K18857+K18857+K01568+K00927+K00002+K00850+K00927+K00121+K00850+K01803+K00873+K00382+K00895+K00161+K03841+K01792+K00844+K00895+K15634+K00850+K00121+K00162+K01623+K18857+K00121+K01623+K00844+K00134+K01835+K00128+K01623+K00627+K01689+K03841+K00873+K00895+K00128+…
Citrate cycle (TCA cycle)	ko00020	125	BMK_Unigene_018150;BMK_Unigene_019839;BMK_Unigene_044261;BMK_Unigene_048608;BMK_Unigene_071880;BMK_Unigene_071926;BMK_Unigene_072354;BMK_Unigene_073180;BMK_Unigene_073784;BMK_Unigene_074591;BMK_Unigene_075140;BMK_Unigene_075176;BMK_Unigene_075434;BMK_Unigene_075982;BMK_Unigene_076494;BMK_Unigene_076587;BMK_Unigene_076915;BMK_Unigene_077032;BMK_Unigene_077528;BMK_Unigene_078491;BMK_Unigene_079072;…	K00235+K00031+K00234+K00031+K00382+K00234+K01648+K00161+K01681+K00235+K00162+K00030+K00031+K01648+K01679+K00026+K00030+K01647+K00031+K00627+K01647+K01610+K00382+K00162+K01900+K00164+K00627+K01681+K00627+K01610+K01899+K00031+K00627+K00382+K00026+K01648+K00031+K00161+K01647+K01648+K00162+K00026+K00627+K00164+K00026+K00236+K01900+K01899+K00026+K00235+K01900+K00025+K00026+K00234+K01900+K01681+K01681+…
Pentose phosphate pathway	ko00030	120	BMK_Unigene_000679;BMK_Unigene_001306;BMK_Unigene_001345;BMK_Unigene_003623;BMK_Unigene_011040;BMK_Unigene_044206;BMK_Unigene_051541;BMK_Unigene_052415;BMK_Unigene_063344;BMK_Unigene_064773;BMK_Unigene_069496;BMK_Unigene_070167;BMK_Unigene_070446;BMK_Unigene_070928;BMK_Unigene_071231;BMK_Unigene_072270;BMK_Unigene_073200;BMK_Unigene_074045;BMK_Unigene_074764;BMK_Unigene_075779;BMK_Unigene_076013;…	K01835+K00948+K01810+K01810+K01621+K00033+K00615+K00616+K01623+K01623+K00850+K00033+K01057+K00850+K01783+K00895+K03841+K00895+K00850+K00948+K00616+K01623+K01057+K01623+K01807+K01835+K01807+K01623+K00948+K03841+K00895+K01810+K00895+K01623+K01810+K01835+K00131+K00851+K00850+K00850+K00033+K01783+K01807+K00036+K00850+K00948+K01623+K00616+K01623+K00033+K00036+K01624+K00616+K01810+K00131+K01623+K01835+…
Pentose and glucuronate interconversions	ko00040	165	BMK_Unigene_000096;BMK_Unigene_012032;BMK_Unigene_045746;BMK_Unigene_064015;BMK_Unigene_065001;BMK_Unigene_067340;BMK_Unigene_068001;BMK_Unigene_071231;BMK_Unigene_071669;BMK_Unigene_072537;BMK_Unigene_072662;BMK_Unigene_073141;BMK_Unigene_073232;BMK_Unigene_073235;BMK_Unigene_073852;BMK_Unigene_073902;BMK_Unigene_073924;BMK_Unigene_074151;BMK_Unigene_074474;BMK_Unigene_074828;BMK_Unigene_074936;…	K01051+K01051+K00002+K01051+K01051+K01051+K00002+K01783+K01728+K16190+K01051+K00078+K01051+K01051+K01184+K01213+K01051+K01051+K01805+K01051+K01728+K01051+K01051+K16190+K01213+K01728+K01051+K00078+K01728+K00008+K01213+K01051+K01051+K01051+K01051+K01213+K01051+K01051+K01051+K01213+K00963+K01051+K00854+K00002+K01728+K01184+K01051+K00002+K01051+K01213+K01184+K00963+K01051+K01051+K01728+K01783+K01184+…
Fructose and mannose metabolism	ko00051	111	BMK_Unigene_048562;BMK_Unigene_063344;BMK_Unigene_064773;BMK_Unigene_069496;BMK_Unigene_070928;BMK_Unigene_071152;BMK_Unigene_072270;BMK_Unigene_072549;BMK_Unigene_073200;BMK_Unigene_073859;BMK_Unigene_074045;BMK_Unigene_074474;BMK_Unigene_074764;BMK_Unigene_074864;BMK_Unigene_076093;BMK_Unigene_076345;BMK_Unigene_076613;BMK_Unigene_076961;BMK_Unigene_077114;BMK_Unigene_077161;BMK_Unigene_078450;…	K00966+K01623+K01623+K00850+K00850+K01803+K00895+K00847+K03841+K00844+K00895+K01805+K00850+K01711+K01623+K01623+K01809+K00966+K00008+K00844+K01623+K00847+K03841+K00895+K00895+K19355+K01803+K17497+K01623+K00847+K01809+K19355+K00850+K00850+K00863+K05305+K00847+K19355+K19355+K01803+K19355+K01805+K00966+K00844+K01803+K00850+K01623+K01803+K01623+K01803+K01624+K02377+K18447+K01623+K01711+K01803+K18447+…
Galactose metabolism	ko00052	134	BMK_Unigene_000450;BMK_Unigene_000679;BMK_Unigene_000900;BMK_Unigene_003608;BMK_Unigene_068482;BMK_Unigene_069478;BMK_Unigene_069496;BMK_Unigene_069516;BMK_Unigene_069517;BMK_Unigene_070928;BMK_Unigene_071687;BMK_Unigene_071786;BMK_Unigene_073074;BMK_Unigene_073859;BMK_Unigene_074764;BMK_Unigene_075313;BMK_Unigene_075780;BMK_Unigene_075956;BMK_Unigene_076301;BMK_Unigene_076533;BMK_Unigene_076545;…	K01784+K01835+K06617+K12309+K12309+K18819+K00850+K12309+K12309+K00850+K07407+K12309+K12309+K00844+K00850+K12309+K12309+K07407+K18819+K12309+K12309+K00844+K01835+K01193+K12309+K07407+K06617+K00963+K12309+K01835+K12309+K12309+K12309+K06617+K00850+K12309+K00850+K12309+K06617+K01193+K00963+K12309+K12309+K12309+K01190+K12309+K00844+K07407+K00850+K01785+K12309+K07407+K01835+K12447+K01785+K00844+K00850+…
Ascorbate and aldarate metabolism	ko00053	97	BMK_Unigene_001147;BMK_Unigene_001419;BMK_Unigene_002855;BMK_Unigene_072269;BMK_Unigene_072537;BMK_Unigene_074106;BMK_Unigene_074272;BMK_Unigene_074508;BMK_Unigene_075233;BMK_Unigene_075348;BMK_Unigene_076218;BMK_Unigene_076467;BMK_Unigene_076560;BMK_Unigene_077599;BMK_Unigene_078044;BMK_Unigene_078167;BMK_Unigene_078185;BMK_Unigene_079150;BMK_Unigene_079797;BMK_Unigene_080021;BMK_Unigene_080610;…	K00128+K00128+K00128+K00423+K16190+K08232+K00434+K00434+K00469+K16190+K18649+K10047+K00434+K00128+K00103+K10047+K17744+K00128+K00128+K08232+K00103+K00434+K00128+K00423+K14190+K00225+K00434+K14085+K00434+K00469+K08232+K00128+K14085+K00128+K00128+K00128+K00012+K00128+K12447+K00469+K00128+K00434+K10046+K00434+K00128+K10047+K00103+K00128+K21888+K00434+K16190+K00423+K00434+K00128+K16190+K00434+K08232+…
Fatty acid biosynthesis	ko00061	76	BMK_Unigene_001011;BMK_Unigene_039465;BMK_Unigene_065002;BMK_Unigene_067754;BMK_Unigene_070078;BMK_Unigene_071521;BMK_Unigene_071574;BMK_Unigene_074841;BMK_Unigene_075125;BMK_Unigene_075260;BMK_Unigene_076010;BMK_Unigene_076409;BMK_Unigene_078359;BMK_Unigene_078608;BMK_Unigene_078684;BMK_Unigene_078762;BMK_Unigene_079104;BMK_Unigene_080071;BMK_Unigene_080338;BMK_Unigene_081141;BMK_Unigene_081389;…	K01897+K00665+K10781+K10781+K03921+K01897+K00059+K01897+K02160+K03921+K01961+K02372+K00645+K10781+K00648+K00208+K07512+K02160+K09458+K18660+K01897+K01897+K09458+K10781+K01962+K01897+K01897+K11262+K01897+K11262+K11262+K18660+K11262+K11262+K03921+K00059+K00059+K02160+K01963+K01897+K10781+K02372+K09458+K03921+K10782+K01897+K00648+K01897+K00059+K09458+K01897+K01897+K01897+K09458+K18660+K01897+K10781+…
Fatty acid elongation	ko00062	41	BMK_Unigene_003405;BMK_Unigene_052098;BMK_Unigene_070130;BMK_Unigene_070346;BMK_Unigene_072608;BMK_Unigene_073407;BMK_Unigene_073923;BMK_Unigene_074076;BMK_Unigene_076141;BMK_Unigene_076194;BMK_Unigene_076513;BMK_Unigene_076986;BMK_Unigene_077663;BMK_Unigene_078590;BMK_Unigene_079104;BMK_Unigene_080124;BMK_Unigene_081182;BMK_Unigene_081260;BMK_Unigene_108467;BMK_Unigene_123872;BMK_Unigene_128710;…	K15397+K01074+K15397+K10249+K10703+K15397+K15397+K01068+K15397+K10251+K10258+K01074+K15397+K15397+K07512+K01074+K10703+K15397+K10249+K15397+K07511+K15397+K15397+K10703+K15397+K01068+K01074+K10251+K15397+K15397+K15397+K10258+K01074+K07511+K07511+K10251+K15397+K15397+K07512+K10258+K10249
Fatty acid degradation	ko00071	139	BMK_Unigene_001011;BMK_Unigene_001147;BMK_Unigene_001403;BMK_Unigene_001419;BMK_Unigene_002855;BMK_Unigene_004324;BMK_Unigene_014128;BMK_Unigene_048739;BMK_Unigene_057867;BMK_Unigene_064338;BMK_Unigene_066940;BMK_Unigene_067021;BMK_Unigene_070225;BMK_Unigene_071521;BMK_Unigene_072828;BMK_Unigene_073330;BMK_Unigene_074841;BMK_Unigene_075113;BMK_Unigene_075775;BMK_Unigene_076152;BMK_Unigene_076334;…	K01897+K00128+K18857+K00128+K00128+K15401+K09478+K10527+K18857+K07513+K18857+K18857+K00121+K01897+K07425+K07513+K01897+K00121+K00626+K18857+K00121+K00232+K00128+K10527+K07517+K00232+K00128+K20495+K00128+K00249+K00128+K00232+K01897+K01897+K00121+K14085+K01897+K00001+K20495+K01897+K01897+K00128+K07513+K14085+K07513+K00128+K00128+K07513+K00626+K00121+K00128+K07511+K15401+K18857+K00128+K00121+K00626+…
Synthesis and degradation of ketone bodies	ko00072	16	BMK_Unigene_075775;BMK_Unigene_078572;BMK_Unigene_078932;BMK_Unigene_079144;BMK_Unigene_125516;BMK_Unigene_134391;BMK_Unigene_147897;BMK_Unigene_151237;BMK_Unigene_152855;BMK_Unigene_155348;BMK_Unigene_155418;BMK_Unigene_170112;BMK_Unigene_262388;BMK_Unigene_265384;BMK_Unigene_265677;BMK_Unigene_290449;	K00626+K01641+K01640+K01640+K00626+K00626+K00626+K01641+K00626+K01640+K01640+K00626+K01640+K00626+K01641+K01027
Cutin, suberine and wax biosynthesis	ko00073	49	BMK_Unigene_001218;BMK_Unigene_002507;BMK_Unigene_004324;BMK_Unigene_045809;BMK_Unigene_064761;BMK_Unigene_065697;BMK_Unigene_069422;BMK_Unigene_070833;BMK_Unigene_073417;BMK_Unigene_074083;BMK_Unigene_074141;BMK_Unigene_075162;BMK_Unigene_077190;BMK_Unigene_077231;BMK_Unigene_078271;BMK_Unigene_078919;BMK_Unigene_079222;BMK_Unigene_079739;BMK_Unigene_084051;BMK_Unigene_128966;BMK_Unigene_130226;…	K15404+K13356+K15401+K20769+K20769+K15405+K15406+K13356+K17991+K15403+K15400+K15403+K15406+K13356+K15406+K15404+K21995+K20495+K20495+K15401+K20769+K13356+K15398+K17991+K17991+K15406+K20495+K13356+K15400+K15400+K15404+K13356+K17991+K15402+K13356+K20769+K15400+K15404+K20495+K15398+K15400+K20769+K15398+K20769+K15400+K15406+K15402+K20769+K20769
Steroid biosynthesis	ko00100	54	BMK_Unigene_016824;BMK_Unigene_018128;BMK_Unigene_074774;BMK_Unigene_074783;BMK_Unigene_075913;BMK_Unigene_076078;BMK_Unigene_076600;BMK_Unigene_076661;BMK_Unigene_076972;BMK_Unigene_077189;BMK_Unigene_078202;BMK_Unigene_078575;BMK_Unigene_078676;BMK_Unigene_079070;BMK_Unigene_079847;BMK_Unigene_080500;BMK_Unigene_080945;BMK_Unigene_081169;BMK_Unigene_081406;BMK_Unigene_081852;BMK_Unigene_084026;…	K14424+K01824+K08246+K01052+K01052+K00222+K05917+K00213+K01824+K00559+K00511+K00222+K07748+K00227+K00801+K01853+K09832+K23558+K01052+K23558+K00511+K00222+K08242+K00213+K01052+K01853+K00511+K00511+K08242+K01052+K14423+K09828+K00559+K01052+K00222+K00801+K23558+K01853+K01052+K00511+K14674+K01052+K08242+K09828+K01052+K09832+K01052+K09828+K00559+K00801+K09828+K00559+K08242+K01052
Ubiquinone and other terpenoid-quinone biosynthesis	ko00130	68	BMK_Unigene_002726;BMK_Unigene_044921;BMK_Unigene_068082;BMK_Unigene_069256;BMK_Unigene_070836;BMK_Unigene_071326;BMK_Unigene_072030;BMK_Unigene_074220;BMK_Unigene_075227;BMK_Unigene_075712;BMK_Unigene_076791;BMK_Unigene_077050;BMK_Unigene_077535;BMK_Unigene_077998;BMK_Unigene_078257;BMK_Unigene_078646;BMK_Unigene_079932;BMK_Unigene_080434;BMK_Unigene_080628;BMK_Unigene_080967;BMK_Unigene_081217;…	K00815+K00457+K23094+K12501+K01904+K19222+K00487+K01661+K03809+K03809+K12501+K12502+K03809+K01904+K12501+K01904+K01904+K01904+K00487+K06126+K09834+K14760+K01904+K02552+K03809+K03809+K01904+K03809+K09833+K00815+K05928+K14760+K14760+K12502+K03809+K23095+K06127+K00591+K01904+K09834+K14759+K01904+K01904+K00487+K01661+K01904+K19222+K23094+K12501+K14759+K00457+K14760+K01904+K01904+K14760+K00815+K14759+…
Oxidative phosphorylation	ko00190	302	BMK_Unigene_000586;BMK_Unigene_002984;BMK_Unigene_003480;BMK_Unigene_017776;BMK_Unigene_018150;BMK_Unigene_038880;BMK_Unigene_044261;BMK_Unigene_046508;BMK_Unigene_047193;BMK_Unigene_051892;BMK_Unigene_052035;BMK_Unigene_052091;BMK_Unigene_054268;BMK_Unigene_055462;BMK_Unigene_057133;BMK_Unigene_060207;BMK_Unigene_060664;BMK_Unigene_061306;BMK_Unigene_062835;BMK_Unigene_063707;BMK_Unigene_064506;…	K02138+K02132+K02147+K02132+K00235+K03879+K00234+K02261+K02149+K03880+K03881+K02261+K01535+K01535+K02262+K02144+K02262+K02256+K03881+K03878+K03883+K02151+K02109+K02145+K02155+K03950+K02260+K02147+K02112+K02112+K00417+K03955+K11352+K02267+K03936+K02153+K02108+K03946+K03879+K00234+K02155+K02267+K11353+K02149+K03949+K00413+K02134+K02155+K02146+K00416+K01507+K00235+K01507+K01535+K03882+K00413+K02113+…
Photosynthesis	ko00195	71	BMK_Unigene_000602;BMK_Unigene_002773;BMK_Unigene_065405;BMK_Unigene_067868;BMK_Unigene_067927;BMK_Unigene_067928;BMK_Unigene_068095;BMK_Unigene_068998;BMK_Unigene_069080;BMK_Unigene_070390;BMK_Unigene_071242;BMK_Unigene_071250;BMK_Unigene_071703;BMK_Unigene_072032;BMK_Unigene_072839;BMK_Unigene_073085;BMK_Unigene_075530;BMK_Unigene_077162;BMK_Unigene_077548;BMK_Unigene_078112;BMK_Unigene_079267;…	K02723+K02639+K02109+K14332+K02112+K02112+K02636+K02638+K02693+K02108+K02699+K02641+K02639+K03542+K08903+K02639+K02113+K02689+K02717+K02717+K02115+K02111+K08901+K02634+K02115+K02712+K02641+K14332+K02641+K02638+K02721+K02693+K02639+K02638+K02697+K02108+K02695+K03689+K08905+K02109+K02704+K02695+K02639+K02692+K02636+K02703+K02108+K02641+K02698+K03542+K02113+K02641+K08901+K02717+K02716+K08902+K02717+…
Photosynthesis - antenna proteins	ko00196	20	BMK_Unigene_002382;BMK_Unigene_070528;BMK_Unigene_072234;BMK_Unigene_073241;BMK_Unigene_074062;BMK_Unigene_075966;BMK_Unigene_077099;BMK_Unigene_084600;BMK_Unigene_123343;BMK_Unigene_125665;BMK_Unigene_140094;BMK_Unigene_140846;BMK_Unigene_141671;BMK_Unigene_143874;BMK_Unigene_146183;BMK_Unigene_146713;BMK_Unigene_147074;BMK_Unigene_156108;BMK_Unigene_157921;BMK_Unigene_277326;	K08915+K08917+K14172+K08915+K08910+K08908+K08913+K08910+K08916+K08909+K08908+K08916+K08915+K08907+K08912+K08911+K14172+K08910+K08908+K08912
Arginine biosynthesis	ko00220	80	BMK_Unigene_004276;BMK_Unigene_045996;BMK_Unigene_050099;BMK_Unigene_057631;BMK_Unigene_061107;BMK_Unigene_069745;BMK_Unigene_070174;BMK_Unigene_072647;BMK_Unigene_073375;BMK_Unigene_075578;BMK_Unigene_075985;BMK_Unigene_076885;BMK_Unigene_077035;BMK_Unigene_077263;BMK_Unigene_077352;BMK_Unigene_078685;BMK_Unigene_078910;BMK_Unigene_079299;BMK_Unigene_079400;BMK_Unigene_079411;BMK_Unigene_080758;…	K01427+K14455+K01940+K01427+K01940+K01940+K00620+K01915+K01915+K00611+K00814+K01476+K00261+K00811+K00145+K14455+K01438+K14677+K14272+K14682+K14677+K13427+K01915+K01940+K00620+K00262+K00261+K14455+K00261+K14454+K01755+K01940+K00814+K01940+K00261+K01915+K01915+K01915+K01915+K01915+K00261+K00261+K01438+K00811+K01940+K14454+K14272+K00814+K14677+K00261+K14677+K00818+K01940+K14455+K01476+K01915+K00262+…
Purine metabolism	ko00230	224	BMK_Unigene_000679;BMK_Unigene_001306;BMK_Unigene_001575;BMK_Unigene_002194;BMK_Unigene_002227;BMK_Unigene_002339;BMK_Unigene_002820;BMK_Unigene_003709;BMK_Unigene_004276;BMK_Unigene_018502;BMK_Unigene_039834;BMK_Unigene_043474;BMK_Unigene_049181;BMK_Unigene_051129;BMK_Unigene_052602;BMK_Unigene_057631;BMK_Unigene_060776;BMK_Unigene_062837;BMK_Unigene_065178;BMK_Unigene_068103;BMK_Unigene_069352;…	K01835+K00948+K13811+K10808+K18453+K00365+K01510+K03787+K01427+K00873+K10807+K12319+K00940+K13758+K01768+K01427+K00939+K19964+K01939+K00940+K00939+K01510+K00873+K01510+K06928+K00988+K01490+K00759+K00940+K00940+K00365+K01081+K00860+K03787+K01517+K01490+K00939+K00948+K13811+K14977+K00860+K18151+K01835+K00951+K02083+K00088+K00948+K00873+K00860+K01835+K01951+K00601+K14641+K01933+K01466+K01488+K00873+…
Caffeine metabolism	ko00232	6	BMK_Unigene_002339;BMK_Unigene_073041;BMK_Unigene_083542;BMK_Unigene_141490;BMK_Unigene_177605;BMK_Unigene_304214;	K00365+K00365+K00106+K00365+K00106+K00106
Pyrimidine metabolism	ko00240	118	BMK_Unigene_001441;BMK_Unigene_001850;BMK_Unigene_002194;BMK_Unigene_002820;BMK_Unigene_003709;BMK_Unigene_039834;BMK_Unigene_049181;BMK_Unigene_063876;BMK_Unigene_068103;BMK_Unigene_069836;BMK_Unigene_070368;BMK_Unigene_071369;BMK_Unigene_072605;BMK_Unigene_072763;BMK_Unigene_072829;BMK_Unigene_073707;BMK_Unigene_073898;BMK_Unigene_074187;BMK_Unigene_074249;BMK_Unigene_074807;BMK_Unigene_074965;…	K01240+K00876+K10808+K01510+K03787+K10807+K00940+K16904+K00940+K01510+K09903+K01510+K00940+K00943+K00940+K01081+K01240+K13800+K03787+K00761+K01431+K01937+K00609+K01937+K01431+K00207+K13998+K01956+K13800+K14641+K13421+K00876+K00940+K01510+K10807+K01465+K01937+K00876+K10808+K11540+K01937+K11540+K01520+K00940+K13421+K00940+K00940+K01465+K00940+K00762+K00761+K00940+K10807+K00940+K01513+K00857+K00876+…
Alanine, aspartate and glutamate metabolism	ko00250	118	BMK_Unigene_003275;BMK_Unigene_003475;BMK_Unigene_045996;BMK_Unigene_050099;BMK_Unigene_061107;BMK_Unigene_065178;BMK_Unigene_068587;BMK_Unigene_069745;BMK_Unigene_071793;BMK_Unigene_072647;BMK_Unigene_073375;BMK_Unigene_073792;BMK_Unigene_075985;BMK_Unigene_076082;BMK_Unigene_076246;BMK_Unigene_076323;BMK_Unigene_077035;BMK_Unigene_077166;BMK_Unigene_077263;BMK_Unigene_077728;BMK_Unigene_078655;…	K01580+K17761+K14455+K01940+K01940+K01939+K13051+K01940+K01953+K01915+K01915+K13051+K00814+K00820+K00609+K00278+K00261+K13566+K00811+K00294+K00830+K14455+K01956+K14272+K16871+K01756+K01915+K01940+K00278+K00262+K00264+K00820+K00261+K11540+K01953+K14455+K00261+K00294+K11540+K14454+K01939+K01755+K01940+K01580+K00814+K01953+K01580+K00827+K01940+K00261+K01915+K01915+K01915+K01915+K01915+K13051+K00261+…
Glycine, serine and threonine metabolism	ko00260	135	BMK_Unigene_002544;BMK_Unigene_002708;BMK_Unigene_004311;BMK_Unigene_004350;BMK_Unigene_038049;BMK_Unigene_070464;BMK_Unigene_070466;BMK_Unigene_071880;BMK_Unigene_073090;BMK_Unigene_073636;BMK_Unigene_073823;BMK_Unigene_074024;BMK_Unigene_074165;BMK_Unigene_074985;BMK_Unigene_075292;BMK_Unigene_075618;BMK_Unigene_075675;BMK_Unigene_076053;BMK_Unigene_076330;BMK_Unigene_076617;BMK_Unigene_076632;…	K00108+K15633+K15919+K00108+K00130+K00600+K00600+K00382+K00928+K15919+K01695+K00130+K15634+K00276+K00499+K01079+K15919+K15893+K02437+K00831+K15919+K01733+K00600+K01733+K06001+K00605+K00830+K12235+K00600+K00600+K02437+K14272+K00872+K00600+K00276+K00058+K00382+K00058+K00276+K00130+K00928+K14085+K01834+K00382+K00130+K00831+K01697+K01758+K14085+K00281+K00058+K00600+K01834+K00133+K00831+K00600+K00827+…
Monobactam biosynthesis	ko00261	15	BMK_Unigene_001575;BMK_Unigene_073090;BMK_Unigene_075984;BMK_Unigene_082597;BMK_Unigene_129922;BMK_Unigene_145991;BMK_Unigene_146503;BMK_Unigene_147000;BMK_Unigene_147414;BMK_Unigene_151032;BMK_Unigene_155786;BMK_Unigene_165365;BMK_Unigene_188336;BMK_Unigene_259735;BMK_Unigene_319115;	K13811+K00928+K13811+K00928+K00133+K01714+K13811+K13811+K00133+K12524+K00928+K13811+K00958+K00958+K13811
Cysteine and methionine metabolism	ko00270	202	BMK_Unigene_000148;BMK_Unigene_000384;BMK_Unigene_002726;BMK_Unigene_003989;BMK_Unigene_007308;BMK_Unigene_007568;BMK_Unigene_045996;BMK_Unigene_064100;BMK_Unigene_064167;BMK_Unigene_065674;BMK_Unigene_065812;BMK_Unigene_069322;BMK_Unigene_070354;BMK_Unigene_070825;BMK_Unigene_071612;BMK_Unigene_071917;BMK_Unigene_072361;BMK_Unigene_073090;BMK_Unigene_073539;BMK_Unigene_073857;BMK_Unigene_074306;…	K00797+K00789+K00815+K05933+K00789+K00789+K14455+K17398+K01738+K01738+K22207+K00547+K00789+K00640+K00837+K00549+K05933+K00928+K00640+K01760+K00826+K01244+K13034+K01919+K01011+K01738+K00789+K00026+K00831+K01761+K00826+K01251+K22207+K00811+K05396+K01738+K22846+K00797+K00640+K14455+K00789+K01738+K00547+K01739+K00058+K23977+K21456+K00058+K00547+K00837+K00558+K00549+K22846+K00928+K01611+K01919+K00558+…
Valine, leucine and isoleucine degradation	ko00280	145	BMK_Unigene_001147;BMK_Unigene_001419;BMK_Unigene_002855;BMK_Unigene_003350;BMK_Unigene_003991;BMK_Unigene_004369;BMK_Unigene_014128;BMK_Unigene_041572;BMK_Unigene_048285;BMK_Unigene_064338;BMK_Unigene_071384;BMK_Unigene_071880;BMK_Unigene_072414;BMK_Unigene_073330;BMK_Unigene_074306;BMK_Unigene_074584;BMK_Unigene_075775;BMK_Unigene_075976;BMK_Unigene_076044;BMK_Unigene_076522;BMK_Unigene_076800;…	K00128+K00128+K00128+K05605+K05605+K00253+K09478+K00140+K09699+K07513+K00166+K00382+K01968+K07513+K00826+K01968+K00626+K00166+K00140+K01969+K00253+K00826+K00020+K00128+K05605+K01641+K01968+K00020+K05607+K01640+K00140+K01640+K00128+K05605+K00128+K00140+K00249+K00382+K00128+K18660+K00140+K00167+K01968+K14085+K01968+K00382+K09699+K00128+K00140+K00140+K07513+K18660+K00826+K14085+K07513+K00128+K00253+…
Valine, leucine and isoleucine biosynthesis	ko00290	35	BMK_Unigene_074276;BMK_Unigene_074306;BMK_Unigene_075988;BMK_Unigene_076974;BMK_Unigene_077526;BMK_Unigene_078574;BMK_Unigene_080253;BMK_Unigene_083458;BMK_Unigene_088526;BMK_Unigene_105865;BMK_Unigene_107281;BMK_Unigene_120063;BMK_Unigene_123752;BMK_Unigene_130132;BMK_Unigene_140628;BMK_Unigene_145767;BMK_Unigene_145769;BMK_Unigene_146345;BMK_Unigene_147222;BMK_Unigene_150373;BMK_Unigene_150844;…	K01653+K00826+K01653+K00826+K00053+K01649+K01703+K01687+K00053+K00053+K00826+K01653+K00052+K01687+K00826+K01653+K01653+K01704+K00052+K00826+K01652+K01754+K01649+K01653+K00053+K01704+K01652+K00052+K01704+K01653+K00053+K00826+K01653+K00826+K01652
Lysine biosynthesis	ko00300	18	BMK_Unigene_007768;BMK_Unigene_067457;BMK_Unigene_073090;BMK_Unigene_077968;BMK_Unigene_078321;BMK_Unigene_078876;BMK_Unigene_082597;BMK_Unigene_123849;BMK_Unigene_129922;BMK_Unigene_133615;BMK_Unigene_138704;BMK_Unigene_145991;BMK_Unigene_147414;BMK_Unigene_149663;BMK_Unigene_151032;BMK_Unigene_152553;BMK_Unigene_153304;BMK_Unigene_155786;	K01655+K10206+K00928+K01586+K01778+K10206+K00928+K00290+K00133+K01655+K00293+K01714+K00133+K01778+K12524+K00003+K00003+K00928
Lysine degradation	ko00310	89	BMK_Unigene_001147;BMK_Unigene_001419;BMK_Unigene_002855;BMK_Unigene_003531;BMK_Unigene_055924;BMK_Unigene_071880;BMK_Unigene_075775;BMK_Unigene_076581;BMK_Unigene_077599;BMK_Unigene_078200;BMK_Unigene_079150;BMK_Unigene_079556;BMK_Unigene_079797;BMK_Unigene_079843;BMK_Unigene_080242;BMK_Unigene_080357;BMK_Unigene_080578;BMK_Unigene_080841;BMK_Unigene_080848;BMK_Unigene_081782;BMK_Unigene_081976;…	K00128+K00128+K00128+K11420+K11420+K00382+K00626+K11433+K00128+K11420+K00128+K23700+K00128+K14157+K11420+K11420+K11420+K00382+K00128+K11430+K11426+K11430+K09188+K11420+K14085+K11420+K11420+K11422+K11423+K11420+K11422+K00382+K00128+K14085+K00128+K00128+K00290+K00626+K00128+K07511+K00128+K00626+K00128+K00471+K00293+K18826+K00128+K00128+K09188+K00128+K00658+K00306+K01692+K00626+K14085+K11426+K00128+…
Arginine and proline metabolism	ko00330	135	BMK_Unigene_000148;BMK_Unigene_001026;BMK_Unigene_001147;BMK_Unigene_001419;BMK_Unigene_001542;BMK_Unigene_002855;BMK_Unigene_003530;BMK_Unigene_045996;BMK_Unigene_067820;BMK_Unigene_072301;BMK_Unigene_073277;BMK_Unigene_075473;BMK_Unigene_076561;BMK_Unigene_076885;BMK_Unigene_077263;BMK_Unigene_077599;BMK_Unigene_077728;BMK_Unigene_078111;BMK_Unigene_078405;BMK_Unigene_078640;BMK_Unigene_078660;…	K00797+K01426+K00128+K00128+K01426+K00128+K10536+K14455+K01426+K01259+K00286+K12259+K00819+K01476+K00811+K00128+K00294+K13366+K00797+K00472+K12657+K14455+K01583+K00128+K00318+K00472+K01426+K00128+K00128+K13427+K01426+K00472+K00472+K01611+K14085+K00128+K14455+K01581+K00294+K14085+K14454+K00128+K01426+K01611+K00128+K01259+K00128+K01581+K01581+K00128+K00128+K00819+K00128+K01426+K00128+K01581+K01611+…
Histidine metabolism	ko00340	53	BMK_Unigene_001147;BMK_Unigene_001419;BMK_Unigene_002855;BMK_Unigene_040078;BMK_Unigene_068866;BMK_Unigene_073371;BMK_Unigene_075485;BMK_Unigene_076218;BMK_Unigene_076817;BMK_Unigene_077479;BMK_Unigene_077599;BMK_Unigene_077701;BMK_Unigene_078133;BMK_Unigene_079150;BMK_Unigene_079797;BMK_Unigene_080848;BMK_Unigene_082564;BMK_Unigene_082871;BMK_Unigene_097930;BMK_Unigene_104849;BMK_Unigene_111417;…	K00128+K00128+K00128+K20246+K14152+K00765+K14152+K18649+K01814+K01663+K00128+K19787+K01590+K00128+K00128+K00128+K00817+K14085+K00128+K01693+K14085+K00128+K00128+K00128+K00128+K00128+K00128+K00128+K00128+K00765+K14085+K14152+K01693+K00128+K11755+K00128+K00128+K19787+K00013+K00128+K00765+K14085+K00128+K00128+K00128+K14085+K00128+K00128+K00128+K00128+K00128+K00128+K01590
Tyrosine metabolism	ko00350	92	BMK_Unigene_001314;BMK_Unigene_001403;BMK_Unigene_002726;BMK_Unigene_006617;BMK_Unigene_044921;BMK_Unigene_045996;BMK_Unigene_051004;BMK_Unigene_057867;BMK_Unigene_066940;BMK_Unigene_067021;BMK_Unigene_070225;BMK_Unigene_072597;BMK_Unigene_074985;BMK_Unigene_075018;BMK_Unigene_075113;BMK_Unigene_076152;BMK_Unigene_076334;BMK_Unigene_077263;BMK_Unigene_077358;BMK_Unigene_078685;BMK_Unigene_079906;…	K02510+K18857+K00815+K00422+K00457+K14455+K00422+K18857+K18857+K18857+K00121+K01557+K00276+K01593+K00121+K18857+K00121+K00811+K01593+K14455+K00276+K00422+K00276+K00422+K01593+K00121+K00817+K00451+K00001+K01800+K00505+K14455+K01555+K14454+K00121+K18857+K00121+K07253+K01555+K01800+K00121+K18857+K01593+K00815+K00001+K00121+K01557+K18857+K15849+K00276+K00001+K00121+K00811+K14454+K00121+K01555+K00276+…
Phenylalanine metabolism	ko00360	61	BMK_Unigene_001026;BMK_Unigene_001542;BMK_Unigene_002726;BMK_Unigene_044921;BMK_Unigene_045996;BMK_Unigene_067820;BMK_Unigene_074985;BMK_Unigene_075018;BMK_Unigene_077263;BMK_Unigene_077358;BMK_Unigene_078685;BMK_Unigene_078956;BMK_Unigene_079584;BMK_Unigene_079906;BMK_Unigene_081351;BMK_Unigene_081374;BMK_Unigene_081681;BMK_Unigene_082564;BMK_Unigene_083393;BMK_Unigene_084279;BMK_Unigene_099730;…	K01426+K01426+K00815+K00457+K14455+K01426+K00276+K01593+K00811+K01593+K14455+K10775+K01426+K00276+K00276+K01426+K01593+K00817+K00074+K10775+K00074+K14455+K14454+K01426+K07253+K01593+K00815+K01426+K01692+K15849+K00276+K00811+K14454+K00276+K00276+K01426+K14455+K00276+K01426+K07253+K00457+K01426+K00276+K00276+K01593+K00815+K00276+K00276+K14454+K14454+K00457+K00811+K00811+K00500+K14454+K14455+K14455+…
Tryptophan metabolism	ko00380	110	BMK_Unigene_001026;BMK_Unigene_001147;BMK_Unigene_001419;BMK_Unigene_001542;BMK_Unigene_002855;BMK_Unigene_062132;BMK_Unigene_065175;BMK_Unigene_067820;BMK_Unigene_068228;BMK_Unigene_069635;BMK_Unigene_071612;BMK_Unigene_071880;BMK_Unigene_072256;BMK_Unigene_072482;BMK_Unigene_073354;BMK_Unigene_074528;BMK_Unigene_074838;BMK_Unigene_075018;BMK_Unigene_075775;BMK_Unigene_077358;BMK_Unigene_077599;…	K01426+K00128+K00128+K01426+K00128+K23947+K22588+K01426+K23947+K22450+K00837+K00382+K23947+K22450+K03781+K23947+K16903+K01593+K00626+K01593+K00128+K00128+K01426+K00128+K00382+K00128+K01426+K00837+K01593+K14085+K00382+K03781+K00128+K03781+K01501+K14085+K00128+K01426+K14264+K01501+K00128+K00626+K23947+K00128+K07511+K00128+K00626+K00128+K22588+K00128+K01593+K01426+K22588+K00128+K23947+K11816+K03781+…
Phenylalanine, tyrosine and tryptophan biosynthesis	ko00400	74	BMK_Unigene_002541;BMK_Unigene_002625;BMK_Unigene_002726;BMK_Unigene_004407;BMK_Unigene_045996;BMK_Unigene_069927;BMK_Unigene_071048;BMK_Unigene_072220;BMK_Unigene_073823;BMK_Unigene_073897;BMK_Unigene_073953;BMK_Unigene_076219;BMK_Unigene_076481;BMK_Unigene_076575;BMK_Unigene_077263;BMK_Unigene_077490;BMK_Unigene_078402;BMK_Unigene_078685;BMK_Unigene_078770;BMK_Unigene_079830;BMK_Unigene_080125;…	K13832+K00800+K00815+K05359+K14455+K13832+K01850+K05359+K01695+K01626+K00891+K01817+K00766+K05359+K00811+K01736+K06001+K14455+K13832+K13832+K01850+K01609+K13832+K05359+K01626+K13832+K13832+K00817+K00891+K13832+K15227+K15227+K14455+K14454+K01696+K00815+K01695+K01850+K01695+K01609+K13832+K15849+K00766+K00811+K13832+K14454+K13832+K01850+K00891+K14455+K13832+K01736+K01626+K01657+K13832+K01735+K05359+…
Benzoxazinoid biosynthesis	ko00402	17	BMK_Unigene_001452;BMK_Unigene_066521;BMK_Unigene_069288;BMK_Unigene_073356;BMK_Unigene_073442;BMK_Unigene_076546;BMK_Unigene_076816;BMK_Unigene_077650;BMK_Unigene_080736;BMK_Unigene_136408;BMK_Unigene_138729;BMK_Unigene_139268;BMK_Unigene_140935;BMK_Unigene_143385;BMK_Unigene_143972;BMK_Unigene_147550;BMK_Unigene_157121;	K13229+K13229+K13229+K13229+K13229+K13229+K13229+K13229+K13229+K13229+K13229+K13229+K13229+K13229+K13229+K13229+K13229
beta-Alanine metabolism	ko00410	106	BMK_Unigene_001147;BMK_Unigene_001419;BMK_Unigene_002855;BMK_Unigene_003275;BMK_Unigene_003350;BMK_Unigene_003991;BMK_Unigene_041572;BMK_Unigene_074965;BMK_Unigene_074985;BMK_Unigene_075473;BMK_Unigene_075907;BMK_Unigene_076044;BMK_Unigene_077023;BMK_Unigene_077132;BMK_Unigene_077599;BMK_Unigene_077784;BMK_Unigene_078111;BMK_Unigene_078170;BMK_Unigene_079074;BMK_Unigene_079131;BMK_Unigene_079150;…	K00128+K00128+K00128+K01580+K05605+K05605+K00140+K01431+K00276+K12259+K01918+K00140+K00232+K01431+K00128+K00207+K13366+K05605+K00140+K00232+K00128+K05605+K00128+K00276+K00140+K00128+K00276+K00232+K00140+K14085+K00128+K00140+K00140+K14085+K00128+K00128+K00128+K07511+K00128+K01580+K14729+K01580+K00128+K00128+K00128+K05605+K00128+K23146+K01692+K00276+K05605+K14085+K13366+K00207+K00140+K05605+K00276+…
Taurine and hypotaurine metabolism	ko00430	15	BMK_Unigene_003275;BMK_Unigene_061655;BMK_Unigene_063658;BMK_Unigene_083496;BMK_Unigene_121558;BMK_Unigene_133545;BMK_Unigene_135681;BMK_Unigene_138896;BMK_Unigene_154572;BMK_Unigene_156079;BMK_Unigene_159529;BMK_Unigene_161246;BMK_Unigene_175066;BMK_Unigene_298136;BMK_Unigene_322225;	K01580+K18592+K18592+K18592+K18592+K01580+K01580+K18592+K01580+K18592+K01580+K01580+K18592+K18592+K00456
Phosphonate and phosphinate metabolism	ko00440	15	BMK_Unigene_067489;BMK_Unigene_074794;BMK_Unigene_075301;BMK_Unigene_077828;BMK_Unigene_083243;BMK_Unigene_135805;BMK_Unigene_137296;BMK_Unigene_144295;BMK_Unigene_148352;BMK_Unigene_148891;BMK_Unigene_149746;BMK_Unigene_150191;BMK_Unigene_156708;BMK_Unigene_179100;BMK_Unigene_200309;	K00993+K00967+K00993+K00993+K00993+K00993+K00967+K00968+K00993+K00993+K00993+K00967+K00967+K00993+K00968
Selenocompound metabolism	ko00450	43	BMK_Unigene_001575;BMK_Unigene_071917;BMK_Unigene_072086;BMK_Unigene_073857;BMK_Unigene_075503;BMK_Unigene_075984;BMK_Unigene_076748;BMK_Unigene_079172;BMK_Unigene_079314;BMK_Unigene_079481;BMK_Unigene_080325;BMK_Unigene_081538;BMK_Unigene_108453;BMK_Unigene_126863;BMK_Unigene_126888;BMK_Unigene_137177;BMK_Unigene_141439;BMK_Unigene_144453;BMK_Unigene_146337;BMK_Unigene_146503;BMK_Unigene_147000;…	K13811+K00549+K00384+K01760+K00384+K13811+K01761+K01874+K11717+K01739+K00384+K00549+K01758+K01739+K00384+K00549+K01739+K01760+K00384+K13811+K13811+K01874+K01761+K01874+K11717+K00384+K01874+K01874+K08247+K00549+K00548+K13811+K01739+K01760+K00958+K01874+K01874+K22182+K00958+K00384+K13811+K00384+K01874
Cyanoamino acid metabolism	ko00460	117	BMK_Unigene_052891;BMK_Unigene_058386;BMK_Unigene_061655;BMK_Unigene_062268;BMK_Unigene_063658;BMK_Unigene_065216;BMK_Unigene_065228;BMK_Unigene_066837;BMK_Unigene_066892;BMK_Unigene_067261;BMK_Unigene_068587;BMK_Unigene_070232;BMK_Unigene_070464;BMK_Unigene_070466;BMK_Unigene_071432;BMK_Unigene_071998;BMK_Unigene_072271;BMK_Unigene_072669;BMK_Unigene_073792;BMK_Unigene_074102;BMK_Unigene_074200;…	K01188+K05350+K18592+K22706+K18592+K01188+K01188+K01188+K08248+K05350+K13051+K16266+K00600+K00600+K20802+K05349+K01188+K20802+K13051+K05349+K20802+K05349+K05350+K20802+K01188+K13034+K05349+K01188+K01188+K22706+K00600+K05349+K01455+K22706+K00600+K01188+K00600+K05350+K01188+K00600+K16266+K05350+K08248+K01188+K05349+K18592+K01188+K01188+K01188+K01501+K22706+K01501+K18592+K00600+K20802+K01188+K01188+…
Glutathione metabolism	ko00480	197	BMK_Unigene_000148;BMK_Unigene_000962;BMK_Unigene_002194;BMK_Unigene_002373;BMK_Unigene_003321;BMK_Unigene_013489;BMK_Unigene_019839;BMK_Unigene_039834;BMK_Unigene_042358;BMK_Unigene_044206;BMK_Unigene_046418;BMK_Unigene_048608;BMK_Unigene_056982;BMK_Unigene_057074;BMK_Unigene_061655;BMK_Unigene_063407;BMK_Unigene_063658;BMK_Unigene_064490;BMK_Unigene_065847;BMK_Unigene_066221;BMK_Unigene_066517;…	K00797+K00799+K10808+K00799+K01255+K00799+K00031+K10807+K00799+K00033+K15428+K00031+K00432+K04097+K18592+K00799+K18592+K00799+K00799+K00799+K00799+K00799+K01255+K00033+K00799+K00799+K00799+K00799+K00799+K01255+K00432+K00799+K00799+K00434+K00434+K00799+K01256+K01919+K22596+K00031+K00799+K22596+K00434+K00031+K00799+K00799+K00797+K01255+K00432+K00434+K21456+K00383+K00033+K01256+K00434+K01919+K10807+…
Starch and sucrose metabolism	ko00500	362	BMK_Unigene_000679;BMK_Unigene_001345;BMK_Unigene_001504;BMK_Unigene_001662;BMK_Unigene_002131;BMK_Unigene_002197;BMK_Unigene_002498;BMK_Unigene_002576;BMK_Unigene_003024;BMK_Unigene_003114;BMK_Unigene_003623;BMK_Unigene_013994;BMK_Unigene_030851;BMK_Unigene_048559;BMK_Unigene_049391;BMK_Unigene_050939;BMK_Unigene_052891;BMK_Unigene_058386;BMK_Unigene_063295;BMK_Unigene_065216;BMK_Unigene_065228;…	K01835+K01810+K00695+K00696+K19893+K01177+K01214+K01176+K00696+K19891+K01810+K01177+K00700+K00700+K19668+K00695+K01188+K05350+K00695+K01188+K01188+K16055+K16055+K01188+K05350+K00695+K00695+K00695+K01177+K00975+K01176+K01179+K01194+K19891+K00695+K05349+K01188+K19893+K01087+K00847+K19891+K19891+K01087+K19892+K00844+K00695+K05349+K01176+K05349+K05350+K13679+K01188+K01176+K05349+K00975+K00695+K01179+…
N-Glycan biosynthesis	ko00510	73	BMK_Unigene_002331;BMK_Unigene_002490;BMK_Unigene_004313;BMK_Unigene_040555;BMK_Unigene_058183;BMK_Unigene_069461;BMK_Unigene_070481;BMK_Unigene_071195;BMK_Unigene_073142;BMK_Unigene_074635;BMK_Unigene_076225;BMK_Unigene_077118;BMK_Unigene_077146;BMK_Unigene_077272;BMK_Unigene_078042;BMK_Unigene_078378;BMK_Unigene_078664;BMK_Unigene_078666;BMK_Unigene_080636;BMK_Unigene_081133;BMK_Unigene_081181;…	K12669+K12670+K00737+K07151+K07151+K07441+K12668+K00729+K00729+K07252+K12670+K00729+K03849+K00736+K00737+K03844+K07151+K01230+K01230+K00902+K07151+K03850+K12666+K12667+K01228+K05546+K03847+K12670+K09659+K07151+K12670+K12670+K05546+K03844+K07252+K03848+K07252+K03842+K00729+K01230+K03844+K03845+K01001+K12666+K03844+K00726+K00902+K00729+K03846+K12666+K01228+K12667+K03849+K03850+K05546+K01230+K23741+…
Other glycan degradation	ko00511	96	BMK_Unigene_001045;BMK_Unigene_002962;BMK_Unigene_003608;BMK_Unigene_053123;BMK_Unigene_066747;BMK_Unigene_068482;BMK_Unigene_069516;BMK_Unigene_069517;BMK_Unigene_071786;BMK_Unigene_072858;BMK_Unigene_073073;BMK_Unigene_073074;BMK_Unigene_075258;BMK_Unigene_075313;BMK_Unigene_075774;BMK_Unigene_075780;BMK_Unigene_076533;BMK_Unigene_076545;BMK_Unigene_076825;BMK_Unigene_077204;BMK_Unigene_077912;…	K01191+K17108+K12309+K12373+K01206+K12309+K12309+K12309+K12309+K15923+K12373+K12309+K01206+K12309+K01206+K12309+K12309+K12309+K01206+K01206+K01206+K12309+K01206+K12309+K12309+K01191+K01206+K12309+K01191+K12309+K12373+K15923+K12309+K12309+K01191+K01191+K01227+K17108+K12309+K12309+K12309+K01190+K01206+K12309+K17108+K17108+K01191+K12309+K01206+K01206+K01191+K17108+K12373+K01191+K01206+K01206+K01444+…
Various types of N-glycan biosynthesis	ko00513	65	BMK_Unigene_002331;BMK_Unigene_002490;BMK_Unigene_040555;BMK_Unigene_053123;BMK_Unigene_058183;BMK_Unigene_068571;BMK_Unigene_069461;BMK_Unigene_070481;BMK_Unigene_073073;BMK_Unigene_076225;BMK_Unigene_077272;BMK_Unigene_078378;BMK_Unigene_078543;BMK_Unigene_078664;BMK_Unigene_078666;BMK_Unigene_080008;BMK_Unigene_080636;BMK_Unigene_081039;BMK_Unigene_081181;BMK_Unigene_081319;BMK_Unigene_081923;…	K12669+K12670+K07151+K12373+K07151+K14412+K07441+K12668+K12373+K12670+K00736+K03844+K14412+K07151+K01230+K03714+K01230+K12373+K07151+K00753+K12666+K12667+K14413+K03847+K12670+K07151+K12670+K12670+K03844+K12373+K12373+K03842+K01230+K03844+K03845+K12666+K03844+K14412+K00753+K00726+K03846+K12666+K12667+K01230+K23741+K01230+K01231+K03843+K12670+K05533+K03844+K07151+K12668+K12666+K00753+K01231+K12373+…
Other types of O-glycan biosynthesis	ko00514	24	BMK_Unigene_074318;BMK_Unigene_075334;BMK_Unigene_076349;BMK_Unigene_076615;BMK_Unigene_077947;BMK_Unigene_080252;BMK_Unigene_081702;BMK_Unigene_082058;BMK_Unigene_082357;BMK_Unigene_127178;BMK_Unigene_140937;BMK_Unigene_144599;BMK_Unigene_145323;BMK_Unigene_149623;BMK_Unigene_149863;BMK_Unigene_149928;BMK_Unigene_154241;BMK_Unigene_154578;BMK_Unigene_154746;BMK_Unigene_155241;BMK_Unigene_155613;…	K20784+K20781+K20782+K18134+K20783+K09667+K03691+K18134+K09667+K20784+K18134+K20782+K20782+K20783+K20783+K18134+K20781+K20782+K09667+K20784+K09667+K09667+K20782+K09667
Mannose type O-glycan biosynthesis	ko00515	3	BMK_Unigene_079040;BMK_Unigene_079702;BMK_Unigene_145433;	K18207+K18207+K18207
Amino sugar and nucleotide sugar metabolism	ko00520	223	BMK_Unigene_000450;BMK_Unigene_000679;BMK_Unigene_001345;BMK_Unigene_002428;BMK_Unigene_002936;BMK_Unigene_002995;BMK_Unigene_003371;BMK_Unigene_003623;BMK_Unigene_003925;BMK_Unigene_047095;BMK_Unigene_048562;BMK_Unigene_053123;BMK_Unigene_059372;BMK_Unigene_064720;BMK_Unigene_064833;BMK_Unigene_065118;BMK_Unigene_065700;BMK_Unigene_065817;BMK_Unigene_066138;BMK_Unigene_067385;BMK_Unigene_067580;…	K01784+K01835+K01810+K13648+K01183+K01183+K12448+K01810+K13379+K01183+K00966+K12373+K13379+K00770+K00326+K20547+K01183+K01183+K01183+K13379+K01183+K15920+K01183+K12448+K20547+K12448+K01183+K01183+K20547+K00975+K01183+K16190+K00847+K20547+K12373+K08678+K01183+K08678+K01183+K00844+K01711+K00975+K16190+K08678+K00820+K01183+K00975+K13648+K01183+K01809+K06118+K00966+K00844+K01183+K01835+K01183+K08678+…
Polyketide sugar unit biosynthesis	ko00523	1	BMK_Unigene_139277;	K12451
Glycosaminoglycan degradation	ko00531	61	BMK_Unigene_003608;BMK_Unigene_053123;BMK_Unigene_066427;BMK_Unigene_068482;BMK_Unigene_069516;BMK_Unigene_069517;BMK_Unigene_070894;BMK_Unigene_071786;BMK_Unigene_073073;BMK_Unigene_073074;BMK_Unigene_075313;BMK_Unigene_075724;BMK_Unigene_075780;BMK_Unigene_076533;BMK_Unigene_076545;BMK_Unigene_077319;BMK_Unigene_077419;BMK_Unigene_078311;BMK_Unigene_079312;BMK_Unigene_079929;BMK_Unigene_080364;…	K12309+K12373+K07964+K12309+K12309+K12309+K07964+K12309+K12373+K12309+K12309+K10532+K12309+K12309+K12309+K10532+K10532+K12309+K12309+K12309+K12309+K12309+K12373+K12309+K12309+K07964+K12309+K12309+K12309+K01205+K12309+K12309+K07964+K12373+K12309+K10532+K12373+K12309+K07964+K10532+K12309+K01205+K12309+K10532+K12309+K12309+K07964+K12309+K10532+K12309+K10532+K10532+K12309+K12373+K12373+K01205+K01137+…
Glycerolipid metabolism	ko00561	184	BMK_Unigene_001147;BMK_Unigene_001419;BMK_Unigene_002855;BMK_Unigene_003166;BMK_Unigene_045746;BMK_Unigene_063544;BMK_Unigene_068001;BMK_Unigene_068038;BMK_Unigene_068437;BMK_Unigene_069290;BMK_Unigene_070022;BMK_Unigene_070990;BMK_Unigene_071629;BMK_Unigene_071687;BMK_Unigene_072875;BMK_Unigene_072960;BMK_Unigene_073267;BMK_Unigene_073525;BMK_Unigene_073742;BMK_Unigene_074050;BMK_Unigene_074258;…	K00128+K00128+K00128+K00901+K00002+K00679+K00002+K21362+K00655+K00679+K18693+K00679+K13513+K07407+K00901+K01054+K13508+K00679+K00655+K00679+K00655+K00901+K00679+K22848+K07407+K00679+K18693+K13523+K00679+K01054+K00679+K00679+K06118+K00901+K00128+K00679+K00901+K00679+K07407+K13506+K00128+K13508+K00128+K13509+K03715+K13508+K00002+K00901+K00128+K21362+K00002+K00679+K00863+K11155+K00630+K06119+K00679+…
Inositol phosphate metabolism	ko00562	143	BMK_Unigene_001655;BMK_Unigene_004171;BMK_Unigene_004282;BMK_Unigene_040439;BMK_Unigene_041572;BMK_Unigene_046701;BMK_Unigene_057123;BMK_Unigene_065869;BMK_Unigene_067911;BMK_Unigene_071152;BMK_Unigene_071313;BMK_Unigene_071460;BMK_Unigene_072690;BMK_Unigene_072961;BMK_Unigene_073139;BMK_Unigene_073199;BMK_Unigene_073595;BMK_Unigene_074090;BMK_Unigene_075233;BMK_Unigene_075749;BMK_Unigene_076044;…	K03103+K00921+K01099+K00999+K00140+K00889+K00889+K00889+K01092+K01803+K01092+K01092+K24221+K00921+K01092+K00913+K00999+K05857+K00469+K22913+K00140+K18649+K01092+K10047+K24221+K05857+K01099+K01114+K13711+K10047+K21797+K05857+K20278+K00913+K00140+K21797+K01099+K01803+K00140+K05857+K00889+K00913+K00921+K00140+K24221+K01110+K01114+K18081+K18081+K00914+K01099+K01803+K01110+K22913+K19801+K10572+K00921+…
Glycosylphosphatidylinositol (GPI)-anchor biosynthesis	ko00563	37	BMK_Unigene_004316;BMK_Unigene_026033;BMK_Unigene_067070;BMK_Unigene_070235;BMK_Unigene_071763;BMK_Unigene_072483;BMK_Unigene_073152;BMK_Unigene_073230;BMK_Unigene_075490;BMK_Unigene_077639;BMK_Unigene_078181;BMK_Unigene_078581;BMK_Unigene_078999;BMK_Unigene_080000;BMK_Unigene_080235;BMK_Unigene_080355;BMK_Unigene_081894;BMK_Unigene_082713;BMK_Unigene_082753;BMK_Unigene_083062;BMK_Unigene_083224;…	K03860+K03860+K03860+K05289+K03860+K05289+K03860+K03857+K03858+K03861+K05283+K05292+K05290+K05291+K07542+K05293+K03857+K05294+K05285+K03857+K05310+K03860+K05292+K03860+K03860+K05291+K05290+K05286+K05284+K03860+K05288+K05285+K03857+K03860+K05293+K05287+K05310
Glycerophospholipid metabolism	ko00564	161	BMK_Unigene_003085;BMK_Unigene_003166;BMK_Unigene_040439;BMK_Unigene_065878;BMK_Unigene_067489;BMK_Unigene_067822;BMK_Unigene_068437;BMK_Unigene_069576;BMK_Unigene_069749;BMK_Unigene_069894;BMK_Unigene_070022;BMK_Unigene_070250;BMK_Unigene_070997;BMK_Unigene_071138;BMK_Unigene_071629;BMK_Unigene_072875;BMK_Unigene_073267;BMK_Unigene_073595;BMK_Unigene_073742;BMK_Unigene_073801;BMK_Unigene_073811;…	K00006+K00901+K00999+K01047+K00993+K16818+K00655+K22389+K06130+K16860+K18693+K00550+K01115+K00995+K13513+K00901+K13508+K00999+K00655+K06130+K22389+K08730+K00655+K16818+K13510+K00967+K00901+K01517+K13511+K00993+K16818+K06130+K18693+K13523+K00981+K01126+K18696+K06123+K16818+K00901+K00894+K01114+K00993+K00901+K00006+K00981+K01047+K13506+K08744+K13508+K16860+K13509+K13508+K14156+K13510+K00901+K14156+…
Ether lipid metabolism	ko00565	45	BMK_Unigene_000116;BMK_Unigene_065878;BMK_Unigene_067489;BMK_Unigene_069894;BMK_Unigene_070997;BMK_Unigene_074644;BMK_Unigene_075301;BMK_Unigene_076930;BMK_Unigene_077744;BMK_Unigene_077828;BMK_Unigene_078808;BMK_Unigene_079893;BMK_Unigene_080504;BMK_Unigene_081619;BMK_Unigene_081635;BMK_Unigene_081885;BMK_Unigene_083243;BMK_Unigene_083299;BMK_Unigene_083941;BMK_Unigene_084222;BMK_Unigene_085961;…	K01062+K01047+K00993+K16860+K01115+K13510+K00993+K06123+K01114+K00993+K01047+K16860+K13510+K01115+K01115+K01114+K00993+K01115+K01115+K01062+K01114+K00993+K06123+K00993+K13510+K00993+K16860+K01114+K00993+K01114+K13519+K13510+K01115+K01115+K01115+K01115+K01115+K14674+K01115+K13510+K13519+K00993+K16794+K01114+K01115
Arachidonic acid metabolism	ko00590	58	BMK_Unigene_056982;BMK_Unigene_057074;BMK_Unigene_061655;BMK_Unigene_063658;BMK_Unigene_065878;BMK_Unigene_071047;BMK_Unigene_072778;BMK_Unigene_072828;BMK_Unigene_073066;BMK_Unigene_073146;BMK_Unigene_073993;BMK_Unigene_074914;BMK_Unigene_076059;BMK_Unigene_077584;BMK_Unigene_078129;BMK_Unigene_078808;BMK_Unigene_080347;BMK_Unigene_082647;BMK_Unigene_082896;BMK_Unigene_083496;BMK_Unigene_083659;…	K00432+K04097+K18592+K18592+K01047+K00079+K00432+K07425+K08726+K08726+K15730+K08726+K00079+K08726+K05309+K01047+K00432+K05309+K01254+K18592+K00432+K00432+K04097+K00432+K00432+K15730+K18592+K04097+K00079+K00432+K15730+K08726+K18592+K01254+K00432+K07425+K00432+K08726+K08726+K07425+K14674+K18592+K00432+K04097+K04097+K00432+K00432+K00432+K04097+K00432+K04097+K00432+K18592+K00432+K15730+K01254+K18592+…
Linoleic acid metabolism	ko00591	20	BMK_Unigene_001114;BMK_Unigene_001291;BMK_Unigene_065878;BMK_Unigene_073089;BMK_Unigene_074360;BMK_Unigene_075642;BMK_Unigene_078808;BMK_Unigene_082663;BMK_Unigene_082704;BMK_Unigene_082848;BMK_Unigene_148158;BMK_Unigene_153469;BMK_Unigene_154002;BMK_Unigene_154463;BMK_Unigene_154624;BMK_Unigene_155580;BMK_Unigene_159120;BMK_Unigene_169605;BMK_Unigene_282602;BMK_Unigene_313936;	K17862+K00454+K01047+K00454+K15718+K15718+K01047+K15718+K00454+K15718+K00454+K00454+K15718+K14674+K00454+K15718+K00454+K00454+K00454+K00454
alpha-Linolenic acid metabolism	ko00592	90	BMK_Unigene_001291;BMK_Unigene_001403;BMK_Unigene_048739;BMK_Unigene_057867;BMK_Unigene_064338;BMK_Unigene_065878;BMK_Unigene_066940;BMK_Unigene_067021;BMK_Unigene_067143;BMK_Unigene_067144;BMK_Unigene_067822;BMK_Unigene_069576;BMK_Unigene_070498;BMK_Unigene_071067;BMK_Unigene_073089;BMK_Unigene_073330;BMK_Unigene_073811;BMK_Unigene_074556;BMK_Unigene_075595;BMK_Unigene_075912;BMK_Unigene_076152;…	K00454+K18857+K10527+K18857+K07513+K01047+K18857+K18857+K05894+K05894+K16818+K22389+K00224+K05894+K00454+K07513+K22389+K16818+K16818+K05894+K18857+K05894+K00232+K16818+K10526+K10527+K01047+K00232+K10528+K01723+K00232+K16818+K00454+K10529+K22389+K07513+K07513+K07513+K00224+K18857+K00224+K22389+K18857+K01723+K05894+K16818+K00224+K10525+K10525+K18857+K05894+K10527+K16818+K00224+K16818+K00454+K07513+…
Sphingolipid metabolism	ko00600	92	BMK_Unigene_002034;BMK_Unigene_002962;BMK_Unigene_003608;BMK_Unigene_049739;BMK_Unigene_068482;BMK_Unigene_069516;BMK_Unigene_069517;BMK_Unigene_070387;BMK_Unigene_071687;BMK_Unigene_071786;BMK_Unigene_073074;BMK_Unigene_073217;BMK_Unigene_074186;BMK_Unigene_075313;BMK_Unigene_075780;BMK_Unigene_075956;BMK_Unigene_076533;BMK_Unigene_076545;BMK_Unigene_076713;BMK_Unigene_076758;BMK_Unigene_076821;…	K04711+K17108+K12309+K00654+K12309+K12309+K12309+K12349+K07407+K12309+K12309+K04713+K04712+K12309+K12309+K07407+K12309+K12309+K04708+K04713+K00654+K12309+K12349+K07407+K00654+K01634+K12309+K12309+K04710+K12309+K04715+K12309+K12309+K12309+K17108+K12309+K12309+K12309+K01190+K12309+K17108+K17108+K07407+K23451+K12309+K07407+K12349+K12349+K17108+K12382+K07407+K12382+K04708+K12309+K04711+K00654+K04708+…
Glycosphingolipid biosynthesis - lacto and neolacto series	ko00601	4	BMK_Unigene_072233;BMK_Unigene_145959;BMK_Unigene_148391;BMK_Unigene_152026;	K01988+K01988+K01988+K01988
Glycosphingolipid biosynthesis - globo and isoglobo series	ko00603	28	BMK_Unigene_053123;BMK_Unigene_071687;BMK_Unigene_072233;BMK_Unigene_073073;BMK_Unigene_075956;BMK_Unigene_078419;BMK_Unigene_081039;BMK_Unigene_101973;BMK_Unigene_130972;BMK_Unigene_141713;BMK_Unigene_144520;BMK_Unigene_145959;BMK_Unigene_147288;BMK_Unigene_148391;BMK_Unigene_149331;BMK_Unigene_151283;BMK_Unigene_152026;BMK_Unigene_154488;BMK_Unigene_161204;BMK_Unigene_206241;BMK_Unigene_215769;…	K12373+K07407+K01988+K12373+K07407+K07407+K12373+K07407+K07407+K07407+K12373+K01988+K12373+K01988+K07407+K07407+K01988+K07407+K07407+K07407+K07407+K12373+K07407+K07407+K12373+K12373+K07407+K12373
Glycosphingolipid biosynthesis - ganglio series	ko00604	42	BMK_Unigene_003608;BMK_Unigene_053123;BMK_Unigene_068482;BMK_Unigene_069516;BMK_Unigene_069517;BMK_Unigene_071786;BMK_Unigene_073073;BMK_Unigene_073074;BMK_Unigene_075313;BMK_Unigene_075780;BMK_Unigene_076533;BMK_Unigene_076545;BMK_Unigene_078311;BMK_Unigene_079312;BMK_Unigene_079929;BMK_Unigene_080364;BMK_Unigene_080669;BMK_Unigene_081039;BMK_Unigene_081136;BMK_Unigene_081427;BMK_Unigene_082361;…	K12309+K12373+K12309+K12309+K12309+K12309+K12373+K12309+K12309+K12309+K12309+K12309+K12309+K12309+K12309+K12309+K12309+K12373+K12309+K12309+K12309+K12309+K12309+K12309+K12309+K12373+K12309+K12373+K12309+K12309+K12309+K12309+K12309+K12309+K12309+K12309+K12373+K12373+K12309+K12373+K12373+K12309
Pyruvate metabolism	ko00620	187	BMK_Unigene_000868;BMK_Unigene_001147;BMK_Unigene_001419;BMK_Unigene_002855;BMK_Unigene_007768;BMK_Unigene_018502;BMK_Unigene_066724;BMK_Unigene_071220;BMK_Unigene_071880;BMK_Unigene_072529;BMK_Unigene_072564;BMK_Unigene_073180;BMK_Unigene_073481;BMK_Unigene_073614;BMK_Unigene_074990;BMK_Unigene_075125;BMK_Unigene_075140;BMK_Unigene_075775;BMK_Unigene_076010;BMK_Unigene_076494;BMK_Unigene_076587;…	K18881+K00128+K00128+K00128+K01655+K00873+K01638+K00873+K00382+K01595+K01069+K00161+K01759+K01595+K01759+K02160+K00162+K00626+K01961+K01679+K00026+K00128+K00627+K01649+K00873+K00128+K01895+K01610+K00128+K00029+K02160+K00102+K00028+K00029+K01895+K00382+K00128+K00162+K01595+K00873+K00627+K00873+K01595+K00028+K00627+K00873+K01962+K14085+K01610+K01595+K01006+K00627+K11262+K00382+K00026+K00128+K11262+…
Glyoxylate and dicarboxylate metabolism	ko00630	169	BMK_Unigene_000480;BMK_Unigene_004311;BMK_Unigene_066724;BMK_Unigene_070464;BMK_Unigene_070466;BMK_Unigene_070747;BMK_Unigene_071880;BMK_Unigene_072647;BMK_Unigene_073354;BMK_Unigene_073375;BMK_Unigene_073419;BMK_Unigene_073424;BMK_Unigene_073636;BMK_Unigene_073784;BMK_Unigene_074026;BMK_Unigene_074912;BMK_Unigene_075256;BMK_Unigene_075675;BMK_Unigene_075775;BMK_Unigene_076053;BMK_Unigene_076064;…	K22133+K15919+K01638+K00600+K00600+K22133+K00382+K01915+K03781+K01915+K19269+K00122+K15919+K01681+K11517+K01601+K18121+K15919+K00626+K15893+K22133+K02437+K00026+K15919+K01601+K01647+K00600+K22133+K01455+K00605+K00830+K00600+K00600+K02437+K01647+K01602+K14272+K01895+K00600+K11517+K01895+K19269+K00382+K01601+K01681+K01915+K00284+K00382+K00026+K03781+K03781+K01647+K00281+K01602+K00026+K00122+K00026+…
Propanoate metabolism	ko00640	99	BMK_Unigene_003350;BMK_Unigene_003991;BMK_Unigene_041572;BMK_Unigene_048285;BMK_Unigene_071384;BMK_Unigene_071880;BMK_Unigene_075125;BMK_Unigene_075775;BMK_Unigene_075976;BMK_Unigene_076010;BMK_Unigene_076044;BMK_Unigene_077023;BMK_Unigene_078170;BMK_Unigene_079074;BMK_Unigene_079131;BMK_Unigene_079248;BMK_Unigene_079477;BMK_Unigene_080071;BMK_Unigene_080427;BMK_Unigene_080715;BMK_Unigene_080841;…	K05605+K05605+K00140+K09699+K00166+K00382+K02160+K00626+K00166+K01961+K00140+K00232+K05605+K00140+K00232+K05605+K01895+K02160+K00140+K01895+K00382+K00232+K01900+K00140+K00167+K01962+K01899+K11262+K00382+K09699+K00140+K11262+K00140+K11262+K11262+K01847+K01966+K01900+K01899+K00626+K01900+K07511+K11262+K00626+K14729+K01895+K01900+K05605+K00167+K02160+K01963+K23146+K01692+K00626+K00166+K05605+K09699+…
Butanoate metabolism	ko00650	58	BMK_Unigene_003275;BMK_Unigene_003475;BMK_Unigene_070061;BMK_Unigene_074276;BMK_Unigene_075256;BMK_Unigene_075775;BMK_Unigene_075988;BMK_Unigene_078572;BMK_Unigene_078932;BMK_Unigene_079144;BMK_Unigene_079703;BMK_Unigene_083393;BMK_Unigene_099730;BMK_Unigene_120063;BMK_Unigene_125516;BMK_Unigene_128710;BMK_Unigene_133417;BMK_Unigene_133545;BMK_Unigene_134391;BMK_Unigene_135681;BMK_Unigene_142329;…	K01580+K17761+K00109+K01653+K18121+K00626+K01653+K01641+K01640+K01640+K16871+K00074+K00074+K01653+K00626+K07511+K18121+K01580+K00626+K01580+K18121+K01692+K01653+K01653+K01913+K00626+K16871+K01913+K01652+K01641+K16871+K00626+K01580+K01913+K01640+K01640+K18121+K01913+K01653+K00135+K01580+K01580+K07511+K01652+K07511+K00626+K13524+K01653+K00823+K00109+K01640+K00626+K01641+K01653+K01027+K01692+K01652+…
C5-Branched dibasic acid metabolism	ko00660	18	BMK_Unigene_074276;BMK_Unigene_075988;BMK_Unigene_080253;BMK_Unigene_120063;BMK_Unigene_123752;BMK_Unigene_145767;BMK_Unigene_145769;BMK_Unigene_146345;BMK_Unigene_147222;BMK_Unigene_150844;BMK_Unigene_156586;BMK_Unigene_160437;BMK_Unigene_162651;BMK_Unigene_171791;BMK_Unigene_172563;BMK_Unigene_183052;BMK_Unigene_272601;BMK_Unigene_307175;	K01653+K01653+K01703+K01653+K00052+K01653+K01653+K01704+K00052+K01652+K01653+K01704+K01652+K00052+K01704+K01653+K01653+K01652
One carbon pool by folate	ko00670	46	BMK_Unigene_005419;BMK_Unigene_070464;BMK_Unigene_070466;BMK_Unigene_075035;BMK_Unigene_077868;BMK_Unigene_078415;BMK_Unigene_078488;BMK_Unigene_078699;BMK_Unigene_078968;BMK_Unigene_079054;BMK_Unigene_079661;BMK_Unigene_080424;BMK_Unigene_081806;BMK_Unigene_113720;BMK_Unigene_124416;BMK_Unigene_126988;BMK_Unigene_128997;BMK_Unigene_129473;BMK_Unigene_133768;BMK_Unigene_138405;BMK_Unigene_139464;…	K00288+K00600+K00600+K00297+K00600+K13998+K00605+K00600+K00600+K00604+K00600+K00601+K00297+K00288+K00600+K01938+K00601+K00602+K00600+K00600+K00600+K00600+K00297+K00288+K00600+K00602+K01938+K01934+K00604+K00600+K00600+K00288+K00601+K01934+K13998+K00600+K00548+K01433+K00604+K13998+K00297+K00288+K01938+K00288+K00600+K13998
Carbon fixation in photosynthetic organisms	ko00710	158	BMK_Unigene_011040;BMK_Unigene_045996;BMK_Unigene_051541;BMK_Unigene_063344;BMK_Unigene_063654;BMK_Unigene_064430;BMK_Unigene_064773;BMK_Unigene_067404;BMK_Unigene_069778;BMK_Unigene_071152;BMK_Unigene_071231;BMK_Unigene_072529;BMK_Unigene_073200;BMK_Unigene_073454;BMK_Unigene_073606;BMK_Unigene_073614;BMK_Unigene_074912;BMK_Unigene_075951;BMK_Unigene_075985;BMK_Unigene_076093;BMK_Unigene_076345;…	K01621+K14455+K00615+K01623+K00134+K00134+K01623+K00927+K00927+K01803+K01783+K01595+K03841+K00855+K05298+K01595+K01601+K05298+K00814+K01623+K01623+K01807+K00026+K01601+K00134+K01807+K01623+K14455+K03841+K01602+K14272+K01610+K01803+K01623+K00029+K00927+K00028+K00029+K00134+K01595+K01601+K01595+K00028+K01783+K00927+K01610+K01595+K01803+K01006+K00927+K01807+K05298+K00026+K01803+K14455+K00029+K01602+…
Thiamine metabolism	ko00730	49	BMK_Unigene_060776;BMK_Unigene_068490;BMK_Unigene_069352;BMK_Unigene_071777;BMK_Unigene_072712;BMK_Unigene_075505;BMK_Unigene_076774;BMK_Unigene_078019;BMK_Unigene_079216;BMK_Unigene_079229;BMK_Unigene_079492;BMK_Unigene_081101;BMK_Unigene_081466;BMK_Unigene_083124;BMK_Unigene_118536;BMK_Unigene_130975;BMK_Unigene_132887;BMK_Unigene_137108;BMK_Unigene_142951;BMK_Unigene_143893;BMK_Unigene_145922;…	K00939+K20896+K00939+K06928+K14394+K00939+K00878+K01662+K06949+K14153+K22911+K01662+K03147+K00939+K01077+K14394+K00939+K00939+K20896+K00939+K03146+K00939+K00949+K03146+K06949+K22911+K22911+K01662+K04487+K22911+K20896+K01662+K03147+K00939+K00939+K22911+K22911+K00939+K01662+K22911+K06928+K04487+K00939+K00939+K04487+K04487+K04487+K00939+K03146
Riboflavin metabolism	ko00740	41	BMK_Unigene_002227;BMK_Unigene_003556;BMK_Unigene_070349;BMK_Unigene_070583;BMK_Unigene_070600;BMK_Unigene_072712;BMK_Unigene_073313;BMK_Unigene_074374;BMK_Unigene_077017;BMK_Unigene_078164;BMK_Unigene_079224;BMK_Unigene_079950;BMK_Unigene_080404;BMK_Unigene_080913;BMK_Unigene_082017;BMK_Unigene_082498;BMK_Unigene_105053;BMK_Unigene_112062;BMK_Unigene_130975;BMK_Unigene_135515;BMK_Unigene_141184;…	K18453+K20884+K20884+K14379+K00794+K14394+K00793+K14379+K22912+K14652+K20884+K20860+K11752+K00953+K14652+K14652+K14379+K14379+K14394+K01513+K14379+K14652+K11752+K14379+K01513+K14379+K11752+K18453+K01513+K01513+K20884+K14652+K14652+K22912+K00953+K14379+K14410+K00953+K14379+K00794+K00861
Vitamin B6 metabolism	ko00750	26	BMK_Unigene_072732;BMK_Unigene_073783;BMK_Unigene_076617;BMK_Unigene_077732;BMK_Unigene_077908;BMK_Unigene_078834;BMK_Unigene_080531;BMK_Unigene_102305;BMK_Unigene_111509;BMK_Unigene_132991;BMK_Unigene_135830;BMK_Unigene_139395;BMK_Unigene_141743;BMK_Unigene_145770;BMK_Unigene_146757;BMK_Unigene_146817;BMK_Unigene_151051;BMK_Unigene_152182;BMK_Unigene_152219;BMK_Unigene_152483;BMK_Unigene_154501;…	K13248+K00275+K00831+K01733+K01733+K05275+K05275+K00831+K06215+K00831+K13248+K08681+K13248+K06215+K01733+K00868+K23998+K05275+K00275+K08681+K05275+K05275+K01733+K00831+K23998+K08681
Nicotinate and nicotinamide metabolism	ko00760	49	BMK_Unigene_000378;BMK_Unigene_001441;BMK_Unigene_002921;BMK_Unigene_003709;BMK_Unigene_024819;BMK_Unigene_069938;BMK_Unigene_073707;BMK_Unigene_073898;BMK_Unigene_074249;BMK_Unigene_076323;BMK_Unigene_077182;BMK_Unigene_078566;BMK_Unigene_079741;BMK_Unigene_081331;BMK_Unigene_081842;BMK_Unigene_082779;BMK_Unigene_082812;BMK_Unigene_083053;BMK_Unigene_086892;BMK_Unigene_103050;BMK_Unigene_117777;…	K03517+K01240+K03517+K03787+K06210+K11414+K01081+K01240+K03787+K00278+K00763+K03517+K03426+K01950+K00858+K11414+K03517+K00278+K11416+K00323+K00323+K01513+K00767+K03787+K00858+K03787+K01513+K11416+K01240+K01513+K01513+K06210+K01950+K00767+K03787+K00858+K00858+K00278+K11414+K01081+K01081+K00135+K03783+K00323+K03517+K01081+K01950+K00323+K11416
Pantothenate and CoA biosynthesis	ko00770	77	BMK_Unigene_001147;BMK_Unigene_001419;BMK_Unigene_002855;BMK_Unigene_072861;BMK_Unigene_073245;BMK_Unigene_074276;BMK_Unigene_074306;BMK_Unigene_074965;BMK_Unigene_075907;BMK_Unigene_075988;BMK_Unigene_076645;BMK_Unigene_076974;BMK_Unigene_077132;BMK_Unigene_077526;BMK_Unigene_077599;BMK_Unigene_077784;BMK_Unigene_079150;BMK_Unigene_079797;BMK_Unigene_080848;BMK_Unigene_083458;BMK_Unigene_088526;…	K00128+K00128+K00128+K00606+K01598+K01653+K00826+K01431+K01918+K01653+K01922+K00826+K01431+K00053+K00128+K00207+K00128+K00128+K00128+K01687+K00053+K00128+K00053+K00826+K00128+K01653+K00128+K00128+K01687+K00128+K01513+K00128+K00826+K00128+K00128+K02201+K00128+K01653+K01653+K01513+K01922+K00207+K01513+K01513+K00128+K00826+K01431+K01652+K00128+K17839+K09680+K17839+K00128+K01464+K00128+K09680+K01653+…
Biotin metabolism	ko00780	22	BMK_Unigene_071574;BMK_Unigene_076409;BMK_Unigene_078420;BMK_Unigene_078762;BMK_Unigene_080338;BMK_Unigene_082217;BMK_Unigene_083946;BMK_Unigene_100024;BMK_Unigene_138955;BMK_Unigene_140604;BMK_Unigene_146171;BMK_Unigene_146567;BMK_Unigene_146909;BMK_Unigene_147286;BMK_Unigene_149254;BMK_Unigene_149599;BMK_Unigene_152765;BMK_Unigene_155546;BMK_Unigene_220529;BMK_Unigene_275981;BMK_Unigene_281599;…	K00059+K02372+K00652+K00208+K09458+K09458+K19562+K00652+K00059+K00059+K02372+K01012+K09458+K19562+K00059+K09458+K09458+K00059+K00059+K01012+K00059+K00059
Lipoic acid metabolism	ko00785	2	BMK_Unigene_078868;BMK_Unigene_083175;	K03801+K03644
Folate biosynthesis	ko00790	43	BMK_Unigene_071047;BMK_Unigene_073796;BMK_Unigene_073815;BMK_Unigene_076059;BMK_Unigene_077567;BMK_Unigene_078164;BMK_Unigene_078249;BMK_Unigene_078415;BMK_Unigene_078505;BMK_Unigene_079399;BMK_Unigene_080264;BMK_Unigene_081273;BMK_Unigene_082017;BMK_Unigene_082148;BMK_Unigene_082498;BMK_Unigene_082529;BMK_Unigene_082562;BMK_Unigene_082670;BMK_Unigene_083440;BMK_Unigene_083973;BMK_Unigene_084059;…	K00079+K15631+K15631+K00079+K03639+K14652+K18482+K13998+K01930+K18482+K15631+K01307+K14652+K15376+K14652+K01495+K15631+K15631+K13950+K15376+K01930+K01077+K15376+K00079+K15631+K01724+K01633+K03635+K15631+K03637+K14652+K14652+K03639+K14652+K01307+K13998+K15631+K13950+K01930+K01737+K13998+K00500+K13998
Porphyrin and chlorophyll metabolism	ko00860	86	BMK_Unigene_002111;BMK_Unigene_073353;BMK_Unigene_073922;BMK_Unigene_073980;BMK_Unigene_074483;BMK_Unigene_074667;BMK_Unigene_075680;BMK_Unigene_076043;BMK_Unigene_076168;BMK_Unigene_077755;BMK_Unigene_078323;BMK_Unigene_078967;BMK_Unigene_079091;BMK_Unigene_079790;BMK_Unigene_080195;BMK_Unigene_080287;BMK_Unigene_080548;BMK_Unigene_080887;BMK_Unigene_081343;BMK_Unigene_081544;BMK_Unigene_081716;…	K00231+K22013+K13544+K19054+K19073+K21480+K19073+K22013+K01772+K02492+K04040+K13071+K13600+K02259+K02303+K13606+K02257+K13071+K00231+K03794+K01885+K08101+K03405+K01845+K00231+K01885+K01698+K01749+K14735+K00228+K18010+K22013+K22013+K13544+K03428+K10960+K01749+K21480+K19054+K18010+K04035+K00218+K21480+K08101+K04040+K01845+K01599+K13545+K08099+K13071+K01599+K01698+K13606+K13600+K01845+K08101+K13071+…
Terpenoid backbone biosynthesis	ko00900	73	BMK_Unigene_001017;BMK_Unigene_001680;BMK_Unigene_061445;BMK_Unigene_067112;BMK_Unigene_068853;BMK_Unigene_069853;BMK_Unigene_070660;BMK_Unigene_072415;BMK_Unigene_072484;BMK_Unigene_073153;BMK_Unigene_074421;BMK_Unigene_074723;BMK_Unigene_075775;BMK_Unigene_076164;BMK_Unigene_076199;BMK_Unigene_076222;BMK_Unigene_076263;BMK_Unigene_077260;BMK_Unigene_078019;BMK_Unigene_078144;BMK_Unigene_078388;…	K11778+K14066+K14066+K15889+K00021+K00099+K11778+K00787+K01823+K05356+K05955+K15891+K00626+K01597+K15892+K05954+K00021+K15889+K01662+K13789+K05356+K00938+K01641+K00869+K11778+K00021+K00991+K05906+K01662+K05356+K14066+K03526+K00804+K00626+K00626+K00021+K13789+K01770+K00021+K10960+K05954+K03527+K00919+K05955+K15892+K11778+K01823+K05954+K00587+K00626+K15891+K08658+K06013+K15889+K13789+K13789+K00869+…
Indole alkaloid biosynthesis	ko00901	5	BMK_Unigene_071377;BMK_Unigene_073711;BMK_Unigene_143375;BMK_Unigene_148426;BMK_Unigene_150812;	K01757+K01757+K01757+K01757+K01757
Monoterpenoid biosynthesis	ko00902	18	BMK_Unigene_066168;BMK_Unigene_068982;BMK_Unigene_069671;BMK_Unigene_072571;BMK_Unigene_075617;BMK_Unigene_076030;BMK_Unigene_076284;BMK_Unigene_077972;BMK_Unigene_081065;BMK_Unigene_083179;BMK_Unigene_120959;BMK_Unigene_125544;BMK_Unigene_138507;BMK_Unigene_143608;BMK_Unigene_145846;BMK_Unigene_146248;BMK_Unigene_146700;BMK_Unigene_151330;	K18108+K23810+K23810+K18108+K18108+K23232+K20618+K18108+K23810+K23810+K18108+K15095+K23232+K18108+K23232+K23810+K23810+K20618
Limonene and pinene degradation	ko00903	29	BMK_Unigene_001147;BMK_Unigene_001419;BMK_Unigene_002855;BMK_Unigene_077599;BMK_Unigene_079150;BMK_Unigene_079797;BMK_Unigene_080848;BMK_Unigene_097930;BMK_Unigene_123360;BMK_Unigene_128205;BMK_Unigene_131958;BMK_Unigene_137355;BMK_Unigene_140683;BMK_Unigene_141853;BMK_Unigene_144179;BMK_Unigene_145713;BMK_Unigene_150103;BMK_Unigene_151094;BMK_Unigene_151649;BMK_Unigene_153629;BMK_Unigene_162941;…	K00128+K00128+K00128+K00128+K00128+K00128+K00128+K00128+K00128+K00128+K00128+K00128+K00128+K00128+K00128+K01692+K00128+K00128+K00128+K00128+K00128+K00128+K00128+K00128+K00128+K00128+K00128+K00128+K01692
Diterpenoid biosynthesis	ko00904	31	BMK_Unigene_002323;BMK_Unigene_003328;BMK_Unigene_004305;BMK_Unigene_039825;BMK_Unigene_067204;BMK_Unigene_067374;BMK_Unigene_067654;BMK_Unigene_068570;BMK_Unigene_070935;BMK_Unigene_071349;BMK_Unigene_072628;BMK_Unigene_073106;BMK_Unigene_075216;BMK_Unigene_075721;BMK_Unigene_077602;BMK_Unigene_080051;BMK_Unigene_080852;BMK_Unigene_082587;BMK_Unigene_083829;BMK_Unigene_137568;BMK_Unigene_138920;…	K13070+K04125+K04125+K04122+K17982+K04125+K13070+K13070+K04124+K04125+K04125+K04124+K04123+K05282+K05282+K04124+K04122+K04121+K04125+K04125+K04124+K04125+K04123+K13070+K17961+K04125+K04123+K05282+K04123+K04123+K04125
Brassinosteroid biosynthesis	ko00905	32	BMK_Unigene_003572;BMK_Unigene_066218;BMK_Unigene_075422;BMK_Unigene_075576;BMK_Unigene_076405;BMK_Unigene_077226;BMK_Unigene_077357;BMK_Unigene_077427;BMK_Unigene_077741;BMK_Unigene_080018;BMK_Unigene_080276;BMK_Unigene_081042;BMK_Unigene_082400;BMK_Unigene_121481;BMK_Unigene_131438;BMK_Unigene_133391;BMK_Unigene_141289;BMK_Unigene_142263;BMK_Unigene_143890;BMK_Unigene_143940;BMK_Unigene_144202;…	K15639+K20623+K15639+K15639+K15639+K12638+K20623+K09591+K15639+K15639+K15639+K12637+K12639+K15639+K15639+K20623+K15639+K15639+K09590+K15639+K09587+K20623+K15639+K15639+K15639+K09591+K09587+K20623+K20623+K09591+K15639+K20623
Carotenoid biosynthesis	ko00906	61	BMK_Unigene_000392;BMK_Unigene_003718;BMK_Unigene_057094;BMK_Unigene_067165;BMK_Unigene_067422;BMK_Unigene_068996;BMK_Unigene_069427;BMK_Unigene_069711;BMK_Unigene_070827;BMK_Unigene_073079;BMK_Unigene_073137;BMK_Unigene_073255;BMK_Unigene_075370;BMK_Unigene_076913;BMK_Unigene_077056;BMK_Unigene_079452;BMK_Unigene_079720;BMK_Unigene_079826;BMK_Unigene_080334;BMK_Unigene_080370;BMK_Unigene_081022;…	K00514+K14595+K09842+K09843+K09838+K09841+K09835+K09842+K15746+K17911+K14595+K09841+K17911+K09838+K09841+K09835+K09840+K06443+K15747+K09835+K02291+K09838+K09837+K02293+K09842+K09840+K09841+K09842+K09842+K09842+K09842+K09841+K09843+K09840+K15746+K09841+K09840+K09841+K09843+K17912+K09835+K14595+K09838+K15747+K14593+K09839+K17913+K09843+K09835+K06444+K09840+K17911+K09839+K09838+K09843+K15744+K02291+…
Zeatin biosynthesis	ko00908	49	BMK_Unigene_001148;BMK_Unigene_001745;BMK_Unigene_004344;BMK_Unigene_051490;BMK_Unigene_065819;BMK_Unigene_067678;BMK_Unigene_071122;BMK_Unigene_071860;BMK_Unigene_072957;BMK_Unigene_074435;BMK_Unigene_075309;BMK_Unigene_075541;BMK_Unigene_076341;BMK_Unigene_076568;BMK_Unigene_077177;BMK_Unigene_079163;BMK_Unigene_080840;BMK_Unigene_080952;BMK_Unigene_080995;BMK_Unigene_081300;BMK_Unigene_082138;…	K23452+K23452+K13493+K13495+K13495+K13496+K13496+K23452+K23452+K23452+K10760+K13493+K13493+K23452+K00279+K00791+K23452+K13496+K23452+K23452+K13495+K23452+K23452+K23452+K13493+K23452+K23452+K13495+K23452+K13496+K13495+K23452+K10760+K10760+K23452+K13496+K00279+K13495+K13493+K13493+K13496+K00791+K23452+K23452+K00279+K13495+K23452+K23452+K13496
Sesquiterpenoid and triterpenoid biosynthesis	ko00909	24	BMK_Unigene_000224;BMK_Unigene_026850;BMK_Unigene_064055;BMK_Unigene_074723;BMK_Unigene_076671;BMK_Unigene_078202;BMK_Unigene_078262;BMK_Unigene_078878;BMK_Unigene_079847;BMK_Unigene_079897;BMK_Unigene_081798;BMK_Unigene_084026;BMK_Unigene_114861;BMK_Unigene_143198;BMK_Unigene_143200;BMK_Unigene_144203;BMK_Unigene_147463;BMK_Unigene_149003;BMK_Unigene_149630;BMK_Unigene_152653;BMK_Unigene_153966;…	K15813+K14173+K15803+K15891+K15803+K00511+K14175+K15813+K00801+K15803+K15813+K00511+K15472+K00511+K00511+K14173+K15803+K15891+K20659+K00801+K00511+K15472+K15813+K00801
Nitrogen metabolism	ko00910	60	BMK_Unigene_061917;BMK_Unigene_071126;BMK_Unigene_072123;BMK_Unigene_072647;BMK_Unigene_073375;BMK_Unigene_074627;BMK_Unigene_076908;BMK_Unigene_077035;BMK_Unigene_077990;BMK_Unigene_078013;BMK_Unigene_078294;BMK_Unigene_080065;BMK_Unigene_080507;BMK_Unigene_080820;BMK_Unigene_082378;BMK_Unigene_082485;BMK_Unigene_083785;BMK_Unigene_084063;BMK_Unigene_084127;BMK_Unigene_091344;BMK_Unigene_100431;…	K01673+K01674+K02575+K01915+K01915+K01673+K00459+K00261+K01674+K01673+K01455+K01673+K02575+K00366+K01674+K01915+K00262+K00284+K00264+K00261+K00261+K01501+K01501+K01674+K01673+K10534+K00261+K01725+K01674+K01673+K01915+K01915+K01915+K01915+K01915+K00261+K00261+K01673+K01674+K02575+K01674+K00261+K01915+K00366+K00262+K00261+K01673+K10534+K01674+K01673+K00261+K10534+K01915+K00264+K00264+K00261+K00264+…
Sulfur metabolism	ko00920	70	BMK_Unigene_001575;BMK_Unigene_061604;BMK_Unigene_064167;BMK_Unigene_065674;BMK_Unigene_070825;BMK_Unigene_071873;BMK_Unigene_073539;BMK_Unigene_074001;BMK_Unigene_074958;BMK_Unigene_075324;BMK_Unigene_075429;BMK_Unigene_075516;BMK_Unigene_075887;BMK_Unigene_075984;BMK_Unigene_077095;BMK_Unigene_078060;BMK_Unigene_078602;BMK_Unigene_079165;BMK_Unigene_079481;BMK_Unigene_079789;BMK_Unigene_080620;…	K13811+K22470+K01738+K01738+K00640+K00988+K00640+K00860+K13034+K01011+K00387+K01738+K17285+K13811+K00860+K01738+K00640+K01738+K01739+K00860+K22966+K05907+K02045+K00392+K00641+K00390+K17069+K01739+K01082+K01738+K01738+K17285+K01739+K02045+K00640+K13034+K22966+K13811+K00640+K13811+K01738+K01738+K01738+K15422+K00860+K01738+K00640+K01082+K05907+K00387+K17285+K01082+K17725+K00860+K13811+K01739+K00860+…
Phenylpropanoid biosynthesis	ko00940	279	BMK_Unigene_000740;BMK_Unigene_001107;BMK_Unigene_002233;BMK_Unigene_005548;BMK_Unigene_014341;BMK_Unigene_040131;BMK_Unigene_045926;BMK_Unigene_048291;BMK_Unigene_052891;BMK_Unigene_057614;BMK_Unigene_058386;BMK_Unigene_062942;BMK_Unigene_063796;BMK_Unigene_064004;BMK_Unigene_064801;BMK_Unigene_065216;BMK_Unigene_065228;BMK_Unigene_066004;BMK_Unigene_066578;BMK_Unigene_066764;BMK_Unigene_066837;…	K00430+K09753+K22395+K00430+K12355+K00083+K22395+K09753+K01188+K13065+K05350+K06892+K23260+K13065+K22395+K01188+K01188+K13066+K13065+K00588+K01188+K05350+K00083+K22395+K09755+K00430+K23260+K09753+K00430+K09753+K22395+K22395+K22395+K00430+K13066+K00430+K00430+K01904+K13065+K09755+K00430+K00430+K00430+K05349+K00487+K00430+K01188+K00430+K13065+K23260+K13066+K22395+K00430+K00430+K00430+K00083+K05349+…
Flavonoid biosynthesis	ko00941	100	BMK_Unigene_000346;BMK_Unigene_013723;BMK_Unigene_029748;BMK_Unigene_049399;BMK_Unigene_057614;BMK_Unigene_061469;BMK_Unigene_064004;BMK_Unigene_066578;BMK_Unigene_066764;BMK_Unigene_068969;BMK_Unigene_068973;BMK_Unigene_070739;BMK_Unigene_070871;BMK_Unigene_071631;BMK_Unigene_071680;BMK_Unigene_072030;BMK_Unigene_072247;BMK_Unigene_072425;BMK_Unigene_072636;BMK_Unigene_073908;BMK_Unigene_074501;…	K22845+K05277+K05278+K13080+K13065+K05280+K13065+K13065+K00588+K08695+K08695+K13080+K13065+K22845+K13080+K00487+K13080+K13065+K13082+K05278+K13065+K13082+K01859+K13065+K13065+K00588+K13082+K13081+K13065+K13065+K13065+K13065+K13065+K00660+K22845+K01859+K13080+K13065+K13080+K13065+K00487+K13065+K01859+K00660+K05277+K00660+K05277+K00660+K01859+K13080+K13080+K13065+K22845+K13065+K13065+K00588+K13080+…
Anthocyanin biosynthesis	ko00942	11	BMK_Unigene_053485;BMK_Unigene_075105;BMK_Unigene_077672;BMK_Unigene_081480;BMK_Unigene_132808;BMK_Unigene_134167;BMK_Unigene_138755;BMK_Unigene_140268;BMK_Unigene_141916;BMK_Unigene_152702;BMK_Unigene_153083;	K17193+K12930+K12930+K17193+K17193+K12930+K17193+K17193+K17193+K12938+K17193
Isoflavonoid biosynthesis	ko00943	31	BMK_Unigene_000326;BMK_Unigene_036687;BMK_Unigene_066882;BMK_Unigene_067192;BMK_Unigene_069981;BMK_Unigene_072795;BMK_Unigene_073821;BMK_Unigene_074404;BMK_Unigene_076462;BMK_Unigene_078313;BMK_Unigene_078986;BMK_Unigene_079550;BMK_Unigene_124657;BMK_Unigene_129045;BMK_Unigene_129692;BMK_Unigene_130903;BMK_Unigene_135862;BMK_Unigene_137899;BMK_Unigene_139333;BMK_Unigene_144899;BMK_Unigene_146078;…	K13260+K13258+K13260+K13260+K13264+K13260+K13260+K13260+K13258+K13260+K13264+K13264+K13260+K13264+K13262+K13265+K13260+K13264+K13260+K13265+K13258+K13260+K13260+K13265+K13264+K13264+K13260+K13260+K13260+K22932+K13260
Flavone and flavonol biosynthesis	ko00944	28	BMK_Unigene_049399;BMK_Unigene_061469;BMK_Unigene_069981;BMK_Unigene_070739;BMK_Unigene_071680;BMK_Unigene_072247;BMK_Unigene_078986;BMK_Unigene_079550;BMK_Unigene_080226;BMK_Unigene_080270;BMK_Unigene_129045;BMK_Unigene_137899;BMK_Unigene_139457;BMK_Unigene_140179;BMK_Unigene_143122;BMK_Unigene_144235;BMK_Unigene_144960;BMK_Unigene_147060;BMK_Unigene_147664;BMK_Unigene_148577;BMK_Unigene_148872;…	K13080+K05280+K13264+K13080+K13080+K13080+K13264+K13264+K13080+K13080+K13264+K13264+K13080+K13080+K22794+K13080+K22772+K13080+K13080+K13080+K13080+K05280+K13264+K13083+K13264+K13080+K05280+K05280
Stilbenoid, diarylheptanoid and gingerol biosynthesis	ko00945	46	BMK_Unigene_057614;BMK_Unigene_064004;BMK_Unigene_066578;BMK_Unigene_066764;BMK_Unigene_070871;BMK_Unigene_072030;BMK_Unigene_072425;BMK_Unigene_074501;BMK_Unigene_074919;BMK_Unigene_076624;BMK_Unigene_076965;BMK_Unigene_077180;BMK_Unigene_077873;BMK_Unigene_078122;BMK_Unigene_078134;BMK_Unigene_078264;BMK_Unigene_078940;BMK_Unigene_080229;BMK_Unigene_080597;BMK_Unigene_080628;BMK_Unigene_080875;…	K13065+K13065+K13065+K00588+K13065+K00487+K13065+K13065+K16040+K13065+K13065+K00588+K13065+K13065+K13065+K13065+K13065+K13065+K13065+K00487+K13065+K13065+K13065+K13065+K00588+K13065+K16040+K13065+K16040+K13065+K09754+K00487+K13065+K00588+K13065+K13065+K16040+K13065+K00588+K00487+K00588+K00487+K00487+K00487+K09754+K00588
Isoquinoline alkaloid biosynthesis	ko00950	63	BMK_Unigene_002726;BMK_Unigene_006617;BMK_Unigene_045996;BMK_Unigene_051004;BMK_Unigene_065121;BMK_Unigene_068643;BMK_Unigene_071238;BMK_Unigene_071742;BMK_Unigene_074985;BMK_Unigene_075018;BMK_Unigene_075965;BMK_Unigene_077263;BMK_Unigene_077358;BMK_Unigene_078685;BMK_Unigene_079906;BMK_Unigene_080828;BMK_Unigene_081128;BMK_Unigene_081351;BMK_Unigene_081552;BMK_Unigene_081681;BMK_Unigene_081889;…	K00815+K00422+K14455+K00422+K14976+K13396+K13390+K13383+K00276+K01593+K13390+K00811+K01593+K14455+K00276+K00422+K13396+K00276+K00422+K01593+K21580+K00505+K14455+K14454+K13390+K13396+K01593+K00815+K22097+K14975+K22097+K13396+K15849+K00276+K22097+K22097+K00811+K14454+K13396+K00276+K00276+K22097+K13390+K14455+K00276+K00276+K00276+K01593+K00815+K00276+K00276+K14454+K14454+K00811+K00811+K14454+K14455+…
Tropane, piperidine and pyridine alkaloid biosynthesis	ko00960	46	BMK_Unigene_002726;BMK_Unigene_045996;BMK_Unigene_069989;BMK_Unigene_071591;BMK_Unigene_071854;BMK_Unigene_072222;BMK_Unigene_074036;BMK_Unigene_074985;BMK_Unigene_077263;BMK_Unigene_078685;BMK_Unigene_079906;BMK_Unigene_081351;BMK_Unigene_082564;BMK_Unigene_099854;BMK_Unigene_113039;BMK_Unigene_125443;BMK_Unigene_133055;BMK_Unigene_141200;BMK_Unigene_144064;BMK_Unigene_144989;BMK_Unigene_146636;…	K00815+K14455+K08081+K08081+K08081+K08081+K08081+K00276+K00811+K14455+K00276+K00276+K00817+K14455+K14454+K08081+K08081+K00815+K08081+K08081+K15849+K00276+K00811+K14454+K00276+K00276+K08081+K14455+K00276+K00276+K00276+K08081+K00815+K00276+K00276+K14454+K14454+K00811+K08081+K00811+K14454+K14455+K14455+K08081+K14455+K14455
Betalain biosynthesis	ko00965	18	BMK_Unigene_071405;BMK_Unigene_074642;BMK_Unigene_074643;BMK_Unigene_075018;BMK_Unigene_077358;BMK_Unigene_077587;BMK_Unigene_077857;BMK_Unigene_081681;BMK_Unigene_082077;BMK_Unigene_086995;BMK_Unigene_093058;BMK_Unigene_104516;BMK_Unigene_141010;BMK_Unigene_145398;BMK_Unigene_155638;BMK_Unigene_209588;BMK_Unigene_292247;BMK_Unigene_322376;	K15777+K15777+K15777+K01593+K01593+K15777+K15777+K01593+K15777+K00505+K15777+K15777+K01593+K15777+K01593+K15777+K00505+K00505
Glucosinolate biosynthesis	ko00966	11	BMK_Unigene_074306;BMK_Unigene_076974;BMK_Unigene_080253;BMK_Unigene_107281;BMK_Unigene_140628;BMK_Unigene_150373;BMK_Unigene_152737;BMK_Unigene_154196;BMK_Unigene_214052;BMK_Unigene_264051;BMK_Unigene_305961;	K00826+K00826+K01703+K00826+K00826+K00826+K11820+K11820+K12156+K00826+K00826
Aminoacyl-tRNA biosynthesis	ko00970	142	BMK_Unigene_001755;BMK_Unigene_003070;BMK_Unigene_004294;BMK_Unigene_045299;BMK_Unigene_050841;BMK_Unigene_052278;BMK_Unigene_065414;BMK_Unigene_069973;BMK_Unigene_072863;BMK_Unigene_073933;BMK_Unigene_074304;BMK_Unigene_074874;BMK_Unigene_074988;BMK_Unigene_075103;BMK_Unigene_075310;BMK_Unigene_075704;BMK_Unigene_076014;BMK_Unigene_076132;BMK_Unigene_076154;BMK_Unigene_077706;BMK_Unigene_077710;…	K01872+K01870+K01868+K01868+K01872+K01868+K01870+K01870+K01870+K01883+K01870+K01892+K01870+K01870+K01869+K01870+K02434+K01889+K01869+K01872+K01881+K04567+K04567+K00604+K01872+K01874+K01869+K01893+K01893+K01875+K01883+K02433+K02433+K04567+K01872+K04567+K01887+K01883+K01890+K01870+K01893+K01885+K02433+K01886+K02434+K01881+K01892+K14164+K01876+K01875+K01872+K02433+K01887+K22503+K01872+K01887+K01885+…
Biosynthesis of various secondary metabolites - part 2	ko00998	2	BMK_Unigene_072230;BMK_Unigene_073553;	K21568+K21568
Biosynthesis of unsaturated fatty acids	ko01040	47	BMK_Unigene_002765;BMK_Unigene_064338;BMK_Unigene_067778;BMK_Unigene_070078;BMK_Unigene_070346;BMK_Unigene_072608;BMK_Unigene_073330;BMK_Unigene_074076;BMK_Unigene_075260;BMK_Unigene_076194;BMK_Unigene_076513;BMK_Unigene_077023;BMK_Unigene_078585;BMK_Unigene_079131;BMK_Unigene_081182;BMK_Unigene_081376;BMK_Unigene_105014;BMK_Unigene_106028;BMK_Unigene_108467;BMK_Unigene_111941;BMK_Unigene_125515;…	K00507+K07513+K10256+K03921+K10249+K10703+K07513+K01068+K03921+K10251+K10258+K00232+K10256+K00232+K10703+K00232+K07513+K10256+K10249+K07513+K07513+K10256+K08764+K03921+K10703+K03921+K01068+K07513+K10251+K10258+K00232+K00232+K03921+K00507+K00232+K10251+K00507+K00232+K10258+K00232+K10249+K00507+K00507+K00232+K00232+K07513+K00232
Carbon metabolism	ko01200	570	BMK_Unigene_001306;BMK_Unigene_001345;BMK_Unigene_002708;BMK_Unigene_003350;BMK_Unigene_003623;BMK_Unigene_003952;BMK_Unigene_003991;BMK_Unigene_004311;BMK_Unigene_018150;BMK_Unigene_018502;BMK_Unigene_019839;BMK_Unigene_041572;BMK_Unigene_044206;BMK_Unigene_044261;BMK_Unigene_045996;BMK_Unigene_048608;BMK_Unigene_051541;BMK_Unigene_052415;BMK_Unigene_063344;BMK_Unigene_063654;BMK_Unigene_064167;…	K00948+K01810+K15633+K05605+K01810+K01689+K05605+K15919+K00235+K00873+K00031+K00140+K00033+K00234+K14455+K00031+K00615+K00616+K01623+K00134+K01738+K00134+K01623+K01738+K01638+K00927+K00850+K00927+K00033+K00121+K01057+K00600+K00600+K00640+K00850+K01803+K00873+K01783+K00382+K00234+K01595+K00161+K03841+K03781+K19269+K00122+K00855+K00640+K05298+K01595+K15919+K01681+K00844+K11517+K15634+K00235+K00850+…
2-Oxocarboxylic acid metabolism	ko01210	116	BMK_Unigene_007768;BMK_Unigene_019839;BMK_Unigene_045996;BMK_Unigene_048608;BMK_Unigene_070174;BMK_Unigene_073090;BMK_Unigene_073784;BMK_Unigene_074276;BMK_Unigene_074306;BMK_Unigene_075176;BMK_Unigene_075434;BMK_Unigene_075985;BMK_Unigene_075988;BMK_Unigene_076915;BMK_Unigene_076974;BMK_Unigene_077032;BMK_Unigene_077263;BMK_Unigene_077352;BMK_Unigene_077526;BMK_Unigene_077528;BMK_Unigene_078574;…	K01655+K00031+K14455+K00031+K00620+K00928+K01681+K01653+K00826+K00030+K00031+K00814+K01653+K00030+K00826+K01647+K00811+K00145+K00053+K00031+K01649+K14455+K01438+K01647+K14677+K14272+K14682+K01703+K14677+K01681+K00928+K00620+K00031+K01687+K00053+K14455+K00031+K00053+K00826+K01647+K14454+K01653+K00052+K00133+K01687+K01655+K00814+K00826+K01681+K01681+K01653+K01653+K00031+K01704+K00030+K00052+K01438+…
Fatty acid metabolism	ko01212	141	BMK_Unigene_001011;BMK_Unigene_002765;BMK_Unigene_014128;BMK_Unigene_039465;BMK_Unigene_048739;BMK_Unigene_052098;BMK_Unigene_064338;BMK_Unigene_065002;BMK_Unigene_067754;BMK_Unigene_067778;BMK_Unigene_070078;BMK_Unigene_070346;BMK_Unigene_071521;BMK_Unigene_071574;BMK_Unigene_072608;BMK_Unigene_073330;BMK_Unigene_074841;BMK_Unigene_075125;BMK_Unigene_075260;BMK_Unigene_075775;BMK_Unigene_076010;…	K01897+K00507+K09478+K00665+K10527+K01074+K07513+K10781+K10781+K10256+K03921+K10249+K01897+K00059+K10703+K07513+K01897+K02160+K03921+K00626+K01961+K10251+K02372+K10258+K01074+K00232+K10527+K00645+K10256+K10781+K00648+K00208+K07512+K00232+K02160+K01074+K09458+K00249+K18660+K10703+K00232+K01897+K01897+K09458+K10781+K01962+K01897+K01897+K11262+K01897+K11262+K11262+K07513+K18660+K10256+K10249+K07513+…
Biosynthesis of amino acids	ko01230	471	BMK_Unigene_000384;BMK_Unigene_001306;BMK_Unigene_002541;BMK_Unigene_002625;BMK_Unigene_002708;BMK_Unigene_003952;BMK_Unigene_004407;BMK_Unigene_007308;BMK_Unigene_007568;BMK_Unigene_007768;BMK_Unigene_018502;BMK_Unigene_019839;BMK_Unigene_045996;BMK_Unigene_048608;BMK_Unigene_050099;BMK_Unigene_051541;BMK_Unigene_052415;BMK_Unigene_061107;BMK_Unigene_063344;BMK_Unigene_063654;BMK_Unigene_064167;…	K00789+K00948+K13832+K00800+K15633+K01689+K05359+K00789+K00789+K01655+K00873+K00031+K14455+K00031+K01940+K00615+K00616+K01940+K01623+K00134+K01738+K00134+K01623+K01738+K00927+K10206+K14152+K00850+K01940+K00927+K13832+K00620+K00789+K00600+K00600+K00640+K00850+K01850+K01803+K00873+K01783+K01953+K00549+K05359+K01915+K00928+K00286+K00765+K01915+K00640+K01681+K01695+K01760+K01626+K00891+K15634+K01653+…
ABC transporters	ko02010	137	BMK_Unigene_002312;BMK_Unigene_002779;BMK_Unigene_003577;BMK_Unigene_003637;BMK_Unigene_003924;BMK_Unigene_004398;BMK_Unigene_050434;BMK_Unigene_050626;BMK_Unigene_065621;BMK_Unigene_065992;BMK_Unigene_066502;BMK_Unigene_067172;BMK_Unigene_068234;BMK_Unigene_071106;BMK_Unigene_071453;BMK_Unigene_071705;BMK_Unigene_071801;BMK_Unigene_071877;BMK_Unigene_072621;BMK_Unigene_072754;BMK_Unigene_074727;…	K05665+K05658+K05681+K05666+K08712+K05665+K05641+K05641+K05666+K05658+K05666+K08712+K05658+K05658+K05666+K05658+K05658+K05666+K05658+K05658+K02195+K05643+K05658+K05658+K05665+K05658+K05658+K05665+K05665+K05643+K05681+K05641+K05681+K05681+K05681+K05681+K05677+K05643+K05658+K02045+K08712+K08712+K05663+K05681+K08712+K05681+K08712+K08712+K05665+K08712+K05658+K05666+K05657+K05658+K05658+K05656+K05666+…
Ribosome biogenesis in eukaryotes	ko03008	169	BMK_Unigene_000656;BMK_Unigene_006769;BMK_Unigene_006807;BMK_Unigene_062171;BMK_Unigene_065652;BMK_Unigene_066181;BMK_Unigene_070386;BMK_Unigene_070460;BMK_Unigene_071178;BMK_Unigene_071272;BMK_Unigene_071350;BMK_Unigene_071519;BMK_Unigene_071537;BMK_Unigene_071723;BMK_Unigene_071965;BMK_Unigene_072039;BMK_Unigene_072088;BMK_Unigene_072090;BMK_Unigene_072298;BMK_Unigene_072338;BMK_Unigene_072658;…	K14571+K07936+K11129+K03115+K14565+K11883+K03097+K11883+K14539+K11129+K13288+K14546+K14563+K14575+K14558+K07936+K14558+K03097+K14558+K14525+K14525+K14561+K07936+K11883+K14549+K07936+K14539+K14537+K07178+K11108+K03097+K14574+K14521+K07562+K14521+K11131+K03264+K07178+K06943+K14569+K07179+K14570+K14559+K03097+K14570+K14554+K14570+K14566+K14546+K14538+K03538+K06943+K14290+K14558+K14548+K14558+K14555+…
Ribosome	ko03010	1306	BMK_Unigene_000810;BMK_Unigene_001149;BMK_Unigene_001207;BMK_Unigene_001298;BMK_Unigene_001515;BMK_Unigene_001627;BMK_Unigene_001888;BMK_Unigene_002402;BMK_Unigene_002409;BMK_Unigene_002499;BMK_Unigene_003005;BMK_Unigene_003096;BMK_Unigene_003346;BMK_Unigene_003512;BMK_Unigene_003723;BMK_Unigene_003776;BMK_Unigene_003777;BMK_Unigene_003818;BMK_Unigene_004346;BMK_Unigene_004396;BMK_Unigene_004475;…	K02871+K02978+K02865+K02929+K02870+K02873+K02899+K02895+K02880+K02974+K02995+K02893+K02996+K02881+K02920+K02981+K02896+K02998+K02982+K02935+K02960+K02938+K02983+K02868+K02947+K02971+K02932+K02903+K02918+K02955+K02942+K02932+K02903+K02918+K02936+K02920+K02891+K02917+K02875+K02883+K02953+K02974+K02894+K02964+K02915+K02991+K02932+K02882+K02998+K02995+K02917+K02889+K02870+K02987+K02880+K02966+K02937+…
RNA transport	ko03013	373	BMK_Unigene_000152;BMK_Unigene_000281;BMK_Unigene_001029;BMK_Unigene_002011;BMK_Unigene_002289;BMK_Unigene_002476;BMK_Unigene_002857;BMK_Unigene_003001;BMK_Unigene_004787;BMK_Unigene_005585;BMK_Unigene_006081;BMK_Unigene_006698;BMK_Unigene_006769;BMK_Unigene_011118;BMK_Unigene_042353;BMK_Unigene_044374;BMK_Unigene_050128;BMK_Unigene_056063;BMK_Unigene_062477;BMK_Unigene_064610;BMK_Unigene_065438;…	K13098+K03251+K13126+K18655+K13151+K14288+K03254+K00974+K13126+K10577+K13126+K03113+K07936+K14004+K13126+K13126+K03242+K03231+K12877+K13098+K03236+K03231+K03236+K03253+K14328+K03231+K03231+K12160+K03231+K03257+K03113+K03239+K05019+K13126+K12160+K03239+K12880+K03259+K14324+K12879+K12881+K12876+K14319+K07936+K03231+K14525+K14525+K14314+K03257+K03250+K03239+K03257+K07936+K03240+K03247+K03262+K18655+…
mRNA surveillance pathway	ko03015	226	BMK_Unigene_000152;BMK_Unigene_000808;BMK_Unigene_001029;BMK_Unigene_001308;BMK_Unigene_001411;BMK_Unigene_002011;BMK_Unigene_003255;BMK_Unigene_004787;BMK_Unigene_006081;BMK_Unigene_007005;BMK_Unigene_018662;BMK_Unigene_019626;BMK_Unigene_042353;BMK_Unigene_042551;BMK_Unigene_044374;BMK_Unigene_046510;BMK_Unigene_047365;BMK_Unigene_054354;BMK_Unigene_057476;BMK_Unigene_061242;BMK_Unigene_062477;…	K13098+K14404+K13126+K14407+K11584+K18655+K14396+K13126+K13126+K06269+K03456+K03265+K13126+K14416+K13126+K14411+K06269+K06269+K08873+K11583+K12877+K13098+K04382+K14328+K04382+K14376+K11584+K04382+K14396+K13126+K14324+K12881+K12876+K06965+K06269+K04354+K04382+K14962+K14376+K04382+K18655+K14396+K13114+K03265+K14400+K06269+K06269+K14325+K14398+K14324+K14411+K14404+K03267+K00565+K11584+K14404+K13098+…
RNA degradation	ko03018	193	BMK_Unigene_000805;BMK_Unigene_001029;BMK_Unigene_001528;BMK_Unigene_001944;BMK_Unigene_001984;BMK_Unigene_003380;BMK_Unigene_003952;BMK_Unigene_004787;BMK_Unigene_006081;BMK_Unigene_042353;BMK_Unigene_044374;BMK_Unigene_057877;BMK_Unigene_067500;BMK_Unigene_067506;BMK_Unigene_067920;BMK_Unigene_068433;BMK_Unigene_069496;BMK_Unigene_069972;BMK_Unigene_070772;BMK_Unigene_070928;BMK_Unigene_071129;…	K12603+K13126+K10643+K12598+K14442+K12598+K01689+K13126+K13126+K13126+K13126+K14442+K04077+K12622+K01148+K12580+K00850+K12586+K13126+K00850+K11600+K12581+K03679+K12622+K12626+K12598+K12581+K04077+K12581+K03681+K12620+K12581+K12627+K00850+K01148+K07573+K04077+K12590+K12617+K04077+K12611+K12603+K12608+K12603+K12608+K12580+K01689+K04077+K01148+K18681+K13126+K14442+K10643+K03514+K12603+K13126+K12580+…
RNA polymerase	ko03020	61	BMK_Unigene_000062;BMK_Unigene_000635;BMK_Unigene_002721;BMK_Unigene_068673;BMK_Unigene_070379;BMK_Unigene_070524;BMK_Unigene_071198;BMK_Unigene_072306;BMK_Unigene_075174;BMK_Unigene_075861;BMK_Unigene_076585;BMK_Unigene_077531;BMK_Unigene_078157;BMK_Unigene_079760;BMK_Unigene_082346;BMK_Unigene_082588;BMK_Unigene_083503;BMK_Unigene_083679;BMK_Unigene_083815;BMK_Unigene_084187;BMK_Unigene_084270;…	K03007+K03018+K03012+K03012+K03013+K03013+K03013+K03046+K03015+K03027+K03026+K03026+K03022+K03011+K03011+K03010+K03046+K03021+K02999+K03006+K03006+K03018+K03004+K03016+K03009+K03016+K03013+K03013+K03014+K03008+K03012+K03015+K03007+K03006+K03025+K03006+K03046+K03027+K03024+K03005+K03026+K03023+K03018+K14721+K03002+K03011+K03006+K03046+K02999+K03006+K03006+K03013+K03010+K03010+K03010+K03023+K03025+…
Basal transcription factors	ko03022	71	BMK_Unigene_000642;BMK_Unigene_066899;BMK_Unigene_068854;BMK_Unigene_068985;BMK_Unigene_070160;BMK_Unigene_072541;BMK_Unigene_072967;BMK_Unigene_073420;BMK_Unigene_074122;BMK_Unigene_075629;BMK_Unigene_075800;BMK_Unigene_076629;BMK_Unigene_076989;BMK_Unigene_077542;BMK_Unigene_077925;BMK_Unigene_078354;BMK_Unigene_078355;BMK_Unigene_078523;BMK_Unigene_078707;BMK_Unigene_079077;BMK_Unigene_079772;…	K03143+K03131+K03132+K02202+K03135+K03126+K03124+K03122+K03131+K03122+K03129+K03131+K03120+K03143+K03124+K10843+K03122+K06634+K10844+K02202+K03137+K06634+K03130+K03138+K03144+K14649+K03122+K03126+K03120+K03129+K03141+K03128+K03129+K03139+K03123+K03131+K03138+K03124+K03133+K03126+K03122+K14649+K03129+K03120+K10842+K03131+K02202+K06634+K14649+K03136+K03131+K03120+K03126+K03131+K02202+K03122+K10843+…
DNA replication	ko03030	79	BMK_Unigene_000330;BMK_Unigene_000898;BMK_Unigene_001216;BMK_Unigene_066210;BMK_Unigene_066813;BMK_Unigene_066929;BMK_Unigene_070228;BMK_Unigene_070438;BMK_Unigene_070991;BMK_Unigene_073304;BMK_Unigene_073446;BMK_Unigene_074176;BMK_Unigene_074882;BMK_Unigene_075479;BMK_Unigene_076638;BMK_Unigene_077360;BMK_Unigene_077734;BMK_Unigene_078084;BMK_Unigene_079166;BMK_Unigene_080924;BMK_Unigene_081197;…	K04802+K02335+K10739+K02540+K10747+K10744+K02541+K02326+K10754+K02325+K03111+K07466+K07466+K02328+K10755+K10755+K10755+K07466+K02209+K07466+K02325+K04799+K02324+K02542+K02327+K10747+K10747+K02324+K07466+K02541+K02320+K02540+K10755+K04802+K02541+K03505+K02325+K02541+K07466+K07466+K03111+K10755+K04802+K10744+K10755+K02542+K10739+K10739+K10756+K02684+K02685+K02335+K03506+K02210+K10756+K03504+K02540+…
Spliceosome	ko03040	469	BMK_Unigene_000152;BMK_Unigene_000211;BMK_Unigene_000501;BMK_Unigene_000657;BMK_Unigene_001057;BMK_Unigene_001486;BMK_Unigene_001726;BMK_Unigene_002029;BMK_Unigene_002092;BMK_Unigene_002115;BMK_Unigene_002307;BMK_Unigene_002900;BMK_Unigene_003026;BMK_Unigene_004238;BMK_Unigene_039182;BMK_Unigene_046057;BMK_Unigene_049921;BMK_Unigene_059062;BMK_Unigene_060068;BMK_Unigene_061060;BMK_Unigene_061893;…	K13098+K12823+K12811+K12741+K03283+K12862+K12861+K12890+K12897+K12827+K12858+K12862+K12818+K12862+K11093+K12891+K11099+K12840+K12874+K12890+K11094+K12877+K13098+K11088+K03283+K11098+K12815+K03283+K03283+K12622+K12863+K12863+K12823+K12818+K12831+K03283+K12741+K12829+K03283+K03283+K11091+K12835+K12835+K12900+K03283+K03283+K12846+K03283+K03283+K11093+K12848+K12824+K12880+K12741+K12879+K12881+K12876+…
Proteasome	ko03050	129	BMK_Unigene_000672;BMK_Unigene_052668;BMK_Unigene_058361;BMK_Unigene_058365;BMK_Unigene_067633;BMK_Unigene_067855;BMK_Unigene_067898;BMK_Unigene_068965;BMK_Unigene_069104;BMK_Unigene_070347;BMK_Unigene_070761;BMK_Unigene_071470;BMK_Unigene_071715;BMK_Unigene_072727;BMK_Unigene_073627;BMK_Unigene_073692;BMK_Unigene_073769;BMK_Unigene_074019;BMK_Unigene_074677;BMK_Unigene_074861;BMK_Unigene_074928;…	K03039+K06700+K03036+K03029+K02726+K03032+K11599+K02734+K02732+K03038+K02739+K02726+K02738+K02730+K02736+K03062+K03038+K03031+K06691+K03061+K06693+K03039+K03033+K03037+K03029+K03063+K03029+K03029+K02728+K03029+K03029+K03029+K03032+K02727+K02736+K02738+K03038+K03039+K02729+K03028+K02739+K02729+K02735+K02731+K03032+K02726+K03036+K02730+K06691+K03063+K02729+K02730+K02735+K02739+K02736+K02736+K02738+…
Protein export	ko03060	84	BMK_Unigene_002360;BMK_Unigene_003861;BMK_Unigene_003996;BMK_Unigene_044548;BMK_Unigene_071535;BMK_Unigene_071615;BMK_Unigene_072456;BMK_Unigene_074032;BMK_Unigene_074375;BMK_Unigene_074517;BMK_Unigene_075013;BMK_Unigene_075650;BMK_Unigene_076945;BMK_Unigene_077372;BMK_Unigene_077493;BMK_Unigene_077929;BMK_Unigene_078400;BMK_Unigene_078755;BMK_Unigene_078847;BMK_Unigene_079881;BMK_Unigene_080776;…	K03105+K09490+K13280+K09490+K09647+K09481+K03116+K03100+K10956+K03100+K03106+K12947+K09648+K03110+K09490+K09540+K09648+K03217+K03100+K10956+K03108+K13431+K10956+K09648+K03070+K12272+K03107+K03106+K03217+K12275+K09490+K07342+K07342+K09490+K10956+K07342+K12946+K03109+K07342+K09481+K03116+K03108+K03105+K07342+K07342+K10956+K09481+K07342+K03100+K09648+K09490+K03110+K03110+K03100+K03118+K03106+K03106+…
Base excision repair	ko03410	64	BMK_Unigene_000330;BMK_Unigene_000898;BMK_Unigene_001637;BMK_Unigene_066813;BMK_Unigene_066826;BMK_Unigene_067558;BMK_Unigene_070277;BMK_Unigene_070402;BMK_Unigene_070438;BMK_Unigene_070445;BMK_Unigene_073120;BMK_Unigene_073304;BMK_Unigene_073590;BMK_Unigene_073642;BMK_Unigene_075479;BMK_Unigene_075553;BMK_Unigene_077110;BMK_Unigene_077339;BMK_Unigene_077407;BMK_Unigene_077919;BMK_Unigene_078887;…	K04802+K02335+K03648+K10747+K10773+K10771+K03648+K01142+K02326+K10773+K10802+K02325+K01246+K03652+K02328+K10773+K10771+K10801+K01246+K03575+K10803+K10798+K02325+K04799+K02324+K01142+K01246+K02327+K24070+K10747+K10747+K02324+K04802+K03505+K02325+K10802+K03648+K01142+K10569+K10801+K04802+K10773+K01246+K10771+K03660+K02335+K03506+K01246+K10563+K03504+K01247+K02325+K10772+K10747+K10747+K02335+K01246+…
Nucleotide excision repair	ko03420	101	BMK_Unigene_000330;BMK_Unigene_000642;BMK_Unigene_000898;BMK_Unigene_001216;BMK_Unigene_001960;BMK_Unigene_065788;BMK_Unigene_066813;BMK_Unigene_067090;BMK_Unigene_068985;BMK_Unigene_070438;BMK_Unigene_070991;BMK_Unigene_072718;BMK_Unigene_073304;BMK_Unigene_074176;BMK_Unigene_074882;BMK_Unigene_075479;BMK_Unigene_075559;BMK_Unigene_076638;BMK_Unigene_077360;BMK_Unigene_077542;BMK_Unigene_077734;…	K04802+K03143+K02335+K10739+K10839+K10848+K10747+K03868+K02202+K02326+K10754+K10849+K02325+K07466+K07466+K02328+K10839+K10755+K10755+K03143+K10755+K07466+K10140+K10843+K06634+K10844+K10570+K02202+K10610+K06634+K10839+K07466+K03144+K02325+K02324+K10609+K02327+K10747+K10747+K02324+K10848+K10848+K03141+K07466+K10755+K04802+K10839+K03505+K02325+K10848+K07466+K07466+K10755+K04802+K10755+K10842+K10739+…
Mismatch repair	ko03430	62	BMK_Unigene_000183;BMK_Unigene_000330;BMK_Unigene_001216;BMK_Unigene_001864;BMK_Unigene_003055;BMK_Unigene_066813;BMK_Unigene_070991;BMK_Unigene_071746;BMK_Unigene_073446;BMK_Unigene_074176;BMK_Unigene_074882;BMK_Unigene_075479;BMK_Unigene_076638;BMK_Unigene_077360;BMK_Unigene_077734;BMK_Unigene_078084;BMK_Unigene_080924;BMK_Unigene_082038;BMK_Unigene_082296;BMK_Unigene_082426;BMK_Unigene_082445;…	K07456+K04802+K10739+K07456+K07456+K10747+K10754+K08737+K03111+K07466+K07466+K02328+K10755+K10755+K10755+K07466+K07466+K07456+K02327+K07456+K10747+K10747+K08734+K08737+K07466+K10755+K04802+K03505+K07466+K07466+K03111+K10755+K04802+K10755+K10739+K10739+K10756+K10756+K03504+K08734+K07466+K10747+K10754+K07456+K10747+K08736+K08735+K10755+K08737+K08739+K07466+K08737+K08737+K07466+K07466+K04802+K03505+…
Homologous recombination	ko03440	95	BMK_Unigene_000590;BMK_Unigene_000898;BMK_Unigene_001216;BMK_Unigene_001370;BMK_Unigene_001525;BMK_Unigene_003419;BMK_Unigene_050087;BMK_Unigene_066308;BMK_Unigene_069553;BMK_Unigene_071333;BMK_Unigene_071365;BMK_Unigene_072028;BMK_Unigene_073446;BMK_Unigene_073676;BMK_Unigene_074176;BMK_Unigene_074207;BMK_Unigene_074699;BMK_Unigene_074882;BMK_Unigene_075453;BMK_Unigene_075479;BMK_Unigene_075823;…	K04728+K02335+K10739+K10867+K10728+K10866+K12173+K04482+K10865+K12173+K10866+K12173+K03111+K12173+K07466+K12173+K15362+K07466+K03553+K02328+K10875+K12173+K12173+K12173+K12173+K07466+K08991+K10728+K11864+K10901+K03655+K10683+K03165+K10867+K07466+K10869+K10728+K04728+K08991+K02327+K04728+K10683+K07466+K10865+K04728+K12173+K12173+K12173+K03505+K12173+K12173+K07466+K07466+K12173+K20776+K03111+K12173+…
Non-homologous end-joining	ko03450	14	BMK_Unigene_003419;BMK_Unigene_063287;BMK_Unigene_069553;BMK_Unigene_071365;BMK_Unigene_073069;BMK_Unigene_081419;BMK_Unigene_081831;BMK_Unigene_082362;BMK_Unigene_082443;BMK_Unigene_083148;BMK_Unigene_084118;BMK_Unigene_087440;BMK_Unigene_153350;BMK_Unigene_171257;	K10866+K10777+K10865+K10866+K10886+K04799+K10885+K10777+K10884+K10777+K10865+K10885+K10865+K10865
MAPK signaling pathway - plant	ko04016	387	BMK_Unigene_001070;BMK_Unigene_001430;BMK_Unigene_001584;BMK_Unigene_001798;BMK_Unigene_002200;BMK_Unigene_002303;BMK_Unigene_002923;BMK_Unigene_004252;BMK_Unigene_005090;BMK_Unigene_009517;BMK_Unigene_014930;BMK_Unigene_041986;BMK_Unigene_042635;BMK_Unigene_049181;BMK_Unigene_050818;BMK_Unigene_055181;BMK_Unigene_056471;BMK_Unigene_060489;BMK_Unigene_062684;BMK_Unigene_063872;BMK_Unigene_063873;…	K02183+K16224+K14497+K14514+K14498+K13416+K16224+K14514+K14512+K20536+K14509+K13422+K17686+K00940+K14510+K02183+K13422+K02183+K14497+K13413+K13413+K13449+K20547+K14510+K14510+K13413+K13447+K14496+K13424+K00940+K13416+K13424+K13449+K14498+K20558+K13425+K20547+K13416+K14497+K13413+K20547+K20725+K13416+K13425+K14498+K13424+K13422+K20558+K20558+K13420+K13422+K20726+K14496+K20558+K13422+K13424+K00940+…
Phosphatidylinositol signaling system	ko04070	149	BMK_Unigene_001070;BMK_Unigene_003166;BMK_Unigene_004171;BMK_Unigene_004282;BMK_Unigene_040439;BMK_Unigene_046701;BMK_Unigene_055181;BMK_Unigene_057123;BMK_Unigene_060489;BMK_Unigene_065869;BMK_Unigene_067911;BMK_Unigene_071313;BMK_Unigene_071460;BMK_Unigene_072875;BMK_Unigene_072961;BMK_Unigene_073139;BMK_Unigene_073199;BMK_Unigene_073595;BMK_Unigene_074090;BMK_Unigene_074802;BMK_Unigene_076218;…	K02183+K00901+K00921+K01099+K00999+K00889+K02183+K00889+K02183+K00889+K01092+K01092+K01092+K00901+K00921+K01092+K00913+K00999+K05857+K00901+K18649+K01092+K10047+K00981+K00901+K05857+K01099+K13711+K10047+K00901+K21797+K00981+K05857+K20278+K00913+K21797+K01099+K02183+K00901+K05857+K00889+K00913+K00921+K01110+K18081+K18081+K00914+K01099+K01110+K19801+K13024+K10572+K00921+K00889+K02183+K02183+K18081+…
Plant hormone signal transduction	ko04075	498	BMK_Unigene_000381;BMK_Unigene_000507;BMK_Unigene_001584;BMK_Unigene_001798;BMK_Unigene_002046;BMK_Unigene_002095;BMK_Unigene_002200;BMK_Unigene_002303;BMK_Unigene_002454;BMK_Unigene_002705;BMK_Unigene_004201;BMK_Unigene_004252;BMK_Unigene_005090;BMK_Unigene_013348;BMK_Unigene_014930;BMK_Unigene_041986;BMK_Unigene_050818;BMK_Unigene_056199;BMK_Unigene_056471;BMK_Unigene_062684;BMK_Unigene_062807;…	K14486+K14486+K14497+K14514+K13463+K16189+K14498+K13416+K14432+K14484+K13415+K14514+K14512+K14484+K14509+K13422+K14510+K14504+K13422+K14497+K14488+K13413+K13413+K13415+K13449+K14488+K13415+K14510+K14510+K13413+K14488+K14488+K14496+K14488+K13416+K13415+K14488+K13449+K14498+K14506+K14506+K14488+K13416+K13463+K14497+K13413+K14486+K13415+K14484+K14484+K13416+K14490+K14491+K14488+K14484+K14498+K13464+…
Ubiquitin mediated proteolysis	ko04120	277	BMK_Unigene_000175;BMK_Unigene_000584;BMK_Unigene_000660;BMK_Unigene_000885;BMK_Unigene_000920;BMK_Unigene_000965;BMK_Unigene_001015;BMK_Unigene_001817;BMK_Unigene_002418;BMK_Unigene_002615;BMK_Unigene_003906;BMK_Unigene_003938;BMK_Unigene_005585;BMK_Unigene_005806;BMK_Unigene_007532;BMK_Unigene_049341;BMK_Unigene_053258;BMK_Unigene_058310;BMK_Unigene_058889;BMK_Unigene_063540;BMK_Unigene_065308;…	K10604+K03869+K08770+K06689+K10260+K10597+K10581+K04706+K03875+K08770+K10260+K04506+K10577+K06689+K03094+K10573+K03094+K03094+K03094+K04506+K02977+K03094+K03868+K06688+K02927+K10578+K20217+K04506+K03094+K10575+K06689+K06689+K06689+K10143+K04506+K04506+K10260+K03873+K10575+K10579+K10684+K10580+K04554+K03354+K10604+K06689+K10686+K10601+K10688+K10604+K03347+K08770+K10580+K10143+K04506+K10614+K10615+…
Sulfur relay system	ko04122	19	BMK_Unigene_063943;BMK_Unigene_075324;BMK_Unigene_076960;BMK_Unigene_077567;BMK_Unigene_078953;BMK_Unigene_078963;BMK_Unigene_122270;BMK_Unigene_136091;BMK_Unigene_142261;BMK_Unigene_144863;BMK_Unigene_149497;BMK_Unigene_151004;BMK_Unigene_151916;BMK_Unigene_152754;BMK_Unigene_164417;BMK_Unigene_194677;BMK_Unigene_220258;BMK_Unigene_230904;BMK_Unigene_265564;	K21232+K01011+K11996+K03639+K14168+K14169+K14171+K12161+K03635+K03637+K11996+K04487+K03639+K21232+K04487+K01011+K04487+K04487+K04487
SNARE interactions in vesicular transport	ko04130	63	BMK_Unigene_069251;BMK_Unigene_072164;BMK_Unigene_072530;BMK_Unigene_072689;BMK_Unigene_072999;BMK_Unigene_073708;BMK_Unigene_074285;BMK_Unigene_074426;BMK_Unigene_076993;BMK_Unigene_077341;BMK_Unigene_078097;BMK_Unigene_078576;BMK_Unigene_079529;BMK_Unigene_079885;BMK_Unigene_080217;BMK_Unigene_083023;BMK_Unigene_085149;BMK_Unigene_099492;BMK_Unigene_101941;BMK_Unigene_101950;BMK_Unigene_136504;…	K08503+K08506+K08517+K08516+K08488+K08505+K08488+K08486+K08497+K08506+K08515+K08489+K08490+K08496+K08495+K08486+K08488+K08516+K08496+K08496+K08488+K08516+K08495+K08506+K08506+K08506+K08492+K08503+K08517+K08493+K08493+K08493+K08486+K08504+K08489+K08504+K08493+K08486+K08490+K08496+K08488+K08515+K08500+K08507+K08490+K08486+K08493+K08486+K08486+K08488+K08493+K08493+K08515+K08488+K08497+K08516+K08493+…
Autophagy - other	ko04136	80	BMK_Unigene_001605;BMK_Unigene_003504;BMK_Unigene_004070;BMK_Unigene_022383;BMK_Unigene_061451;BMK_Unigene_065679;BMK_Unigene_068182;BMK_Unigene_068974;BMK_Unigene_069649;BMK_Unigene_070458;BMK_Unigene_071241;BMK_Unigene_071252;BMK_Unigene_073252;BMK_Unigene_074061;BMK_Unigene_074109;BMK_Unigene_074527;BMK_Unigene_075091;BMK_Unigene_076361;BMK_Unigene_076517;BMK_Unigene_077279;BMK_Unigene_078665;…	K08343+K08339+K08333+K07204+K08336+K04382+K04382+K08341+K04382+K19730+K17908+K08342+K08341+K04382+K08343+K04382+K08266+K08341+K08334+K17888+K17606+K08331+K08269+K08343+K04382+K08342+K08269+K00914+K17908+K08341+K08331+K08269+K17907+K07203+K17906+K08341+K17907+K08341+K17907+K08341+K04382+K08341+K08341+K08341+K07204+K08341+K08343+K08269+K08334+K17908+K17606+K17890+K08342+K08337+K08343+K04382+K08330+…
Protein processing in endoplasmic reticulum	ko04141	450	BMK_Unigene_000885;BMK_Unigene_000965;BMK_Unigene_001023;BMK_Unigene_001044;BMK_Unigene_001057;BMK_Unigene_001119;BMK_Unigene_001334;BMK_Unigene_001750;BMK_Unigene_001877;BMK_Unigene_001960;BMK_Unigene_001963;BMK_Unigene_002331;BMK_Unigene_002448;BMK_Unigene_002490;BMK_Unigene_003861;BMK_Unigene_003880;BMK_Unigene_003895;BMK_Unigene_004297;BMK_Unigene_005806;BMK_Unigene_007532;BMK_Unigene_007954;…	K06689+K10597+K13989+K13993+K03283+K09518+K13993+K09580+K14012+K10839+K09580+K12669+K09517+K12670+K09490+K13993+K09580+K14005+K06689+K03094+K13525+K14004+K09517+K09584+K07151+K09580+K09490+K09580+K14006+K13993+K04079+K03094+K04079+K07151+K03094+K03094+K13993+K13993+K04079+K13993+K01456+K04079+K03283+K04523+K13993+K03094+K09562+K03283+K03868+K03283+K10578+K03283+K03094+K10575+K06689+K06689+K06689+…
Endocytosis	ko04144	370	BMK_Unigene_000766;BMK_Unigene_000794;BMK_Unigene_000926;BMK_Unigene_001057;BMK_Unigene_001079;BMK_Unigene_001289;BMK_Unigene_002374;BMK_Unigene_002599;BMK_Unigene_002990;BMK_Unigene_003004;BMK_Unigene_003278;BMK_Unigene_003494;BMK_Unigene_004087;BMK_Unigene_041411;BMK_Unigene_041693;BMK_Unigene_046701;BMK_Unigene_053310;BMK_Unigene_056414;BMK_Unigene_056551;BMK_Unigene_057123;BMK_Unigene_061665;…	K01528+K19476+K19476+K03283+K01528+K12492+K18467+K12197+K15053+K07904+K05756+K12198+K12479+K18443+K04646+K00889+K05754+K07889+K07904+K00889+K12486+K03283+K00889+K05754+K07937+K03283+K12198+K03283+K03283+K12192+K07937+K12193+K07904+K07904+K03283+K03283+K07904+K03283+K03283+K03283+K12189+K07897+K03283+K07904+K01115+K07897+K07901+K12486+K07901+K07889+K07889+K03283+K07904+K12486+K11866+K03283+K05757+…
Phagosome	ko04145	201	BMK_Unigene_003480;BMK_Unigene_004171;BMK_Unigene_047193;BMK_Unigene_051158;BMK_Unigene_056414;BMK_Unigene_060207;BMK_Unigene_065043;BMK_Unigene_066005;BMK_Unigene_066069;BMK_Unigene_066681;BMK_Unigene_067539;BMK_Unigene_067596;BMK_Unigene_068335;BMK_Unigene_070316;BMK_Unigene_070508;BMK_Unigene_071189;BMK_Unigene_071232;BMK_Unigene_071559;BMK_Unigene_071615;BMK_Unigene_071832;BMK_Unigene_072015;…	K02147+K00921+K02149+K07375+K07889+K02144+K02151+K04392+K02145+K02155+K07375+K02147+K07375+K02153+K07897+K07897+K07375+K04392+K09481+K08057+K02155+K07889+K07889+K08517+K00921+K08488+K02149+K04392+K07374+K04392+K07897+K02155+K02146+K08057+K08488+K10956+K07897+K07374+K08057+K07889+K07374+K04392+K02144+K02155+K07897+K12182+K07375+K07374+K02155+K10956+K02145+K07374+K00921+K10956+K02154+K00914+K07374+…
Peroxisome	ko04146	186	BMK_Unigene_000446;BMK_Unigene_001011;BMK_Unigene_002395;BMK_Unigene_002507;BMK_Unigene_002678;BMK_Unigene_015191;BMK_Unigene_019025;BMK_Unigene_019839;BMK_Unigene_048468;BMK_Unigene_048608;BMK_Unigene_050486;BMK_Unigene_058194;BMK_Unigene_062245;BMK_Unigene_064338;BMK_Unigene_070833;BMK_Unigene_071521;BMK_Unigene_071954;BMK_Unigene_071960;BMK_Unigene_072509;BMK_Unigene_072848;BMK_Unigene_073066;…	K13338+K01897+K13342+K13356+K17879+K13344+K11147+K00031+K13338+K00031+K04565+K04564+K13347+K07513+K13356+K01897+K04565+K13237+K00477+K04565+K08726+K08726+K04565+K07513+K03781+K13348+K04564+K11517+K12663+K13346+K13347+K01897+K06664+K08726+K13341+K13348+K00031+K04564+K00232+K13356+K13335+K00031+K08726+K13346+K17879+K00830+K00869+K01640+K00232+K01640+K03426+K11517+K13348+K04564+K00232+K01897+K01897+…
Plant-pathogen interaction	ko04626	658	BMK_Unigene_000088;BMK_Unigene_000103;BMK_Unigene_000678;BMK_Unigene_000899;BMK_Unigene_001042;BMK_Unigene_001070;BMK_Unigene_001286;BMK_Unigene_001430;BMK_Unigene_002000;BMK_Unigene_002303;BMK_Unigene_002700;BMK_Unigene_002923;BMK_Unigene_003244;BMK_Unigene_003368;BMK_Unigene_003384;BMK_Unigene_003405;BMK_Unigene_003955;BMK_Unigene_004383;BMK_Unigene_005090;BMK_Unigene_012832;BMK_Unigene_019595;…	K13466+K18875+K13430+K13466+K13435+K02183+K18873+K16224+K13473+K13416+K13435+K16224+K13457+K13430+K13459+K15397+K13430+K13457+K14512+K13430+K01373+K01373+K04079+K13448+K04079+K02183+K13435+K05391+K13466+K13448+K13459+K04079+K13457+K13448+K13459+K13448+K04079+K13413+K13413+K13449+K13459+K13448+K13448+K13459+K13448+K13459+K13413+K13459+K13447+K05391+K13448+K13424+K13466+K13457+K13416+K13424+K13412+…
Circadian rhythm - plant	ko04712	110	BMK_Unigene_000074;BMK_Unigene_000848;BMK_Unigene_001213;BMK_Unigene_002459;BMK_Unigene_003325;BMK_Unigene_062171;BMK_Unigene_066482;BMK_Unigene_066630;BMK_Unigene_069364;BMK_Unigene_069515;BMK_Unigene_070386;BMK_Unigene_070505;BMK_Unigene_071276;BMK_Unigene_071550;BMK_Unigene_071693;BMK_Unigene_072090;BMK_Unigene_072156;BMK_Unigene_072515;BMK_Unigene_072523;BMK_Unigene_074149;BMK_Unigene_074254;…	K12119+K12135+K12129+K12127+K12135+K03115+K16241+K12129+K10143+K12135+K03097+K16221+K12118+K16221+K12133+K03097+K12126+K12129+K12115+K12133+K12135+K12126+K12135+K03097+K10143+K12118+K16221+K00660+K03097+K12133+K12126+K16222+K16222+K12130+K12135+K16222+K16221+K12135+K12129+K12125+K12135+K12121+K12121+K00660+K16240+K12120+K16240+K16222+K12133+K03115+K00660+K12129+K16223+K12133+K03115+K16222+K00660+…
