# Supplementary material
Source: MDPI journal article supplement (https://www.mdpi.com/1999-4907/15/4/618)
Supplement: s1 [file s1 › Supplementary Table S5.xlsx]

## Sheet: Sheet1
Supplementary Table S5: The DEGs in the pathway of Carbon Metabolism
#ID	GGr-1_count	GGr-1_FPKM	GGr-2_count	GGr-2_FPKM	GGr-3_count	GGr-3_FPKM	GGs-1_count	GGs-1_FPKM	GGs-2_count	GGs-2_FPKM	GGs-3_count	GGs-3_FPKM	GSr-1_count	GSr-1_FPKM	GSr-2_count	GSr-2_FPKM	GSr-3_count	GSr-3_FPKM	GSs-1_count	GSs-1_FPKM	GSs-2_count	GSs-2_FPKM	GSs-3_count	GSs-3_FPKM	SGr-1_count	SGr-1_FPKM	SGr-2_count	SGr-2_FPKM	SGr-3_count	SGr-3_FPKM	SGr2-1_count	SGr2-1_FPKM	SGr2-2_count	SGr2-2_FPKM	SGr2-3_count	SGr2-3_FPKM	SGs-1_count	SGs-1_FPKM	SGs-2_count	SGs-2_FPKM	SGs-3_count	SGs-3_FPKM	SGs2-1_count	SGs2-1_FPKM	SGs2-2_count	SGs2-2_FPKM	SGs2-3_count	SGs2-3_FPKM	SSr-1_count
BMK_Unigene_079857	1437	56.49	1463	58	1411	54.84	760	25.74	818	25.26	424	15.51	538	18.65	656	19.34	349	15.18	606	23.85	940	29.62	380	14.54	197	7.21	468	17.82	844	30.75	594	23.25	2059	72.35	524	20.65	470	15.61	358	12.94	539	20.8	608	22.73	329	12.26	414	14.56	61
BMK_Unigene_078450	312	16.58	370	19.81	405	21.27	66998	3068.72	82156	3441.92	41766	2066.48	1175	55.12	4755	189.82	367	21.62	46840	2491.66	17641	749.96	71420	3690.14	7909	390.09	732	37.7	6416	316.76	4293	227.66	558	26.6	1501	80.13	44023	1977.4	37202	1819.78	39356	2053.73	56444	2848.66	61856	3113.96	38121	1809.74	2219
BMK_Unigene_152204	36	1.66	28	1.28	48	2.13	7420	286.83	8453	298.3	4863	203.09	277	10.97	1758	59.23	68	3.4	4443	199.47	2012	72.33	6198	270.4	857	35.71	30	1.35	620	25.85	400	17.9	41	1.67	109	4.91	6585	249.53	5141	212.13	5579	245.72	6983	297.75	7675	326.11	6139	246.09	169
BMK_Unigene_143244	0	0	0	0	0	0	0	0	0	0	0	0	260	13.6	30	1.33	687	45.16	0	0	0	0	0	0	0	0	0	0	0	0	0	0	73	3.88	9	0.54	0	0	0	0	0	0	0	0	0	0	0	0	0
BMK_Unigene_073200	2	0.13	12	0.79	7	0.45	6152	349.08	7485	389.58	3602	220.75	207	12.04	726	35.91	43	3.15	5688	374.8	1733	91	7243	463.26	1340	81.76	30	1.91	400	24.5	608	39.99	0	0	83	5.5	3343	186.15	2615	158.61	3124	201.93	3558	222.06	4743	295.77	3568	209.66	59
BMK_Unigene_151377	1980	79.67	1854	75.24	2077	82.64	2076	71.93	1927	60.89	2184	81.76	1279	45.33	1634	49.34	1824	81.09	1234	49.66	1793	57.84	1191	46.59	3573	133.5	2558	99.65	2880	107.41	2916	116.83	2833	101.91	2926	117.97	3381	114.8	2873	106.21	2699	106.55	2222	84.98	2560	97.5	3398	122.14	4021
BMK_Unigene_135044	1	0.05	2	0.11	0	0	0	0	0	0	0	0	518	23.92	646	25.39	194	11.25	0	0	0	0	0	0	1	0.05	9	0.46	3	0.15	61	3.19	27	1.27	5	0.26	0	0	0	0	0	0	0	0	0	0	0	0	1
BMK_Unigene_156481	1800	29.26	1843	30.28	1920	30.89	2445	34.16	2629	33.33	2232	33.71	471	6.73	694	8.45	354	6.33	2239	36.35	1596	20.88	2065	32.62	2039	30.81	2189	34.4	2014	30.21	2107	33.97	3091	44.65	2051	33.25	530	7.26	428	6.37	545	8.68	632	9.79	533	8.19	422	6.13	91
BMK_Unigene_133910	3	0.2	0	0	0	0	0	0	0	0	0	0	692	40.76	860	43.05	326	24.15	0	0	0	0	0	0	21	1.3	10	0.65	0	0	76	5.06	81	4.85	16	1.07	0	0	0	0	0	0	0	0	0	0	0	0	5
BMK_Unigene_078491	710	26.06	672	24.87	615	22.33	372	11.77	291	8.39	240	8.21	113	3.66	125	3.44	151	6.14	213	7.82	193	5.69	181	6.48	165	5.65	372	13.21	327	11.12	463	16.91	491	16.1	329	12.08	256	7.93	191	6.46	210	7.56	55	1.93	48	1.67	111	3.66	63
BMK_Unigene_073614	86	7.34	114	9.85	90	7.66	43	3.19	35	2.38	25	1.99	83	6.29	208	13.41	96	9.16	64	5.53	32	2.19	70	5.83	22	1.8	46	3.84	15	1.24	57	4.96	60	4.69	98	8.51	55	3.98	53	4.18	42	3.56	56	4.53	44	3.57	92	7.03	140
BMK_Unigene_150477	237	9.73	146	6.04	244	9.91	86	3.06	41	1.34	45	1.74	164	5.93	183	5.64	117	5.3	76	3.15	140	4.61	20	0.8	40	1.52	83	3.29	75	2.87	49	2.03	74	2.74	45	1.88	143	4.95	134	5.06	88	3.57	57	2.22	26	1.03	97	3.56	135
BMK_Unigene_064773	14	1.02	16	1.18	17	1.23	39	2.46	23	1.33	131	8.92	3	0.19	0	0	10	0.81	1	0.07	12	0.7	11	0.78	1	0.07	1	0.07	2	0.14	7	0.51	18	1.18	2	0.15	1	0.06	2	0.13	2	0.14	8	0.55	35	2.42	2	0.13	0
BMK_Unigene_148394	0	0	0	0	0	0	0	0	0	0	0	0	242	9.16	35	1.13	699	33.19	0	0	0	0	0	0	0	0	0	0	0	0	0	0	109	4.19	1	0.04	0	0	0	0	0	0	0	0	0	0	0	0	0
BMK_Unigene_139969	0	0	1	0.05	4	0.19	0	0	0	0	0	0	169	7.35	185	6.85	63	3.44	0	0	0	0	0	0	15	0.69	8	0.38	0	0	26	1.28	9	0.4	13	0.64	0	0	0	0	0	0	0	0	0	0	0	0	2
BMK_Unigene_073606	11	0.7	24	1.57	17	1.12	22453	1225.76	25065	1254.48	14123	832.76	292	16.37	1576	75.02	76	5.39	11410	723.4	5459	275.98	16080	989.67	2313	135.86	97	5.95	1583	93.26	1198	75.85	20	1.16	215	13.75	5999	321.34	5138	299.77	5227	325.11	6771	406.76	7235	434.09	6035	341.28	94
BMK_Unigene_003952	233	18.73	198	16	231	18.33	56	3.89	54	3.45	127	9.52	76	5.42	101	6.11	123	11.04	19	1.53	22	1.41	12	0.94	19	1.42	99	7.73	86	6.45	59	4.75	42	3.05	42	3.41	57	3.89	47	3.49	21	1.66	12	0.91	8	0.61	39	2.8	91
BMK_Unigene_276913	0	0	0	0	0	0	0	0	0	0	0	0	47	4.77	86	7.38	17	2.18	0	0	0	0	0	0	0	0	2	0.22	0	0	5	0.57	5	0.52	9	1.04	0	0	0	0	0	0	0	0	0	0	0	0	0
BMK_Unigene_153129	239	9.63	200	8.12	270	10.76	64	2.22	84	2.66	89	3.36	134	4.77	151	4.58	165	7.37	98	3.96	232	7.5	57	2.26	94	3.53	97	3.81	119	4.44	99	3.97	293	10.53	94	3.8	122	4.17	114	4.24	84	3.33	123	4.73	80	3.05	115	4.15	72
BMK_Unigene_152948	350	9.46	556	15.17	267	7.15	299	6.95	250	5.28	393	9.87	9199	218.22	10592	214.36	5219	155.12	425	11.47	291	6.32	445	11.68	750	18.82	598	15.62	803	20.06	742	19.91	468	11.27	703	18.99	978	22.26	557	13.8	641	16.99	1075	27.61	1115	28.48	1021	24.64	1274
BMK_Unigene_140779	99	6.13	126	7.85	89	5.44	1150	61.36	1172	57.31	995	57.34	2040	111.57	1912	88.91	743	51.08	1243	77.02	418	20.66	1620	97.45	1827	104.86	296	17.76	875	50.37	614	37.96	209	11.62	576	35.86	688	36.01	570	32.5	641	38.96	994	58.36	1141	66.9	629	34.76	648
BMK_Unigene_131466	5	0.27	0	0	1	0.05	0	0	0	0	0	0	142	6.74	216	8.72	116	6.91	0	0	0	0	0	0	3	0.15	13	0.68	0	0	42	2.25	8	0.39	6	0.32	0	0	0	0	0	0	0	0	0	0	0	0	3
BMK_Unigene_082912	944	22.54	1404	33.87	757	17.89	1930	39.63	2186	40.79	2293	50.89	12176	255.32	15603	279.18	6852	179.94	3283	78.32	1338	25.7	3477	80.68	1980	43.93	1744	40.27	2790	61.57	1560	37	1328	28.24	2444	58.27	1287	25.88	721	15.78	882	20.66	1433	32.57	1684	38.02	1573	33.56	1458
BMK_Unigene_147552	186	6.52	205	7.27	208	7.21	87	2.62	83	2.29	87	2.85	212	6.55	217	5.72	268	10.36	81	2.86	62	1.76	59	2.01	30	0.98	65	2.23	119	3.88	101	3.53	134	4.2	100	3.53	338	10	248	7.98	269	9.27	74	2.49	65	2.18	172	5.39	58
BMK_Unigene_083257	47	1.33	50	1.43	63	1.74	4465	106.98	5832	127.08	4034	104.44	25	0.63	112	2.34	12	0.39	3015	83.92	1163	26.03	5606	151.74	445	11.53	48	1.3	469	12.1	299	8.29	36	0.89	44	1.25	3163	74.21	2346	59.92	2639	72.06	2293	60.75	3005	79.15	2301	57.25	11
BMK_Unigene_147283	109	4.24	97	3.81	101	3.89	149	4.99	175	5.34	85	3.08	506	17.33	420	12.26	213	9.15	80	3.11	188	5.86	82	3.1	30	1.08	61	2.3	350	12.62	56	2.17	121	4.21	78	3.04	466	15.3	433	15.47	438	16.72	628	23.22	461	16.97	453	15.74	239
BMK_Unigene_147329	1	0.06	0	0	0	0	0	0	0	0	0	0	211	11.02	317	14.08	55	3.61	0	0	0	0	0	0	16	0.88	0	0	0	0	45	2.66	29	1.54	8	0.48	0	0	0	0	0	0	0	0	0	0	0	0	0
BMK_Unigene_145950	1481	63.02	1277	54.79	1590	66.89	405	14.84	320	10.7	457	18.09	717	26.88	754	24.08	851	40.03	363	15.45	536	18.28	168	6.95	259	10.23	776	31.97	729	28.76	637	27	971	36.96	823	35.1	688	24.71	845	33.04	653	27.27	278	11.24	298	12	560	21.29	837
BMK_Unigene_134293	0	0	4	0.34	0	0	0	0	0	0	2	0.16	319	23.7	40	2.52	925	86.6	0	0	0	0	0	0	0	0	0	0	0	0	0	0	75	5.68	9	0.76	0	0	0	0	0	0	0	0	0	0	0	0	0
BMK_Unigene_112021	0	0	0	0	0	0	0	0	0	0	0	0	168	5.34	254	6.88	67	2.67	0	0	0	0	0	0	1	0.03	1	0.03	0	0	21	0.75	14	0.45	5	0.18	0	0	0	0	0	0	0	0	0	0	0	0	11
BMK_Unigene_148417	54	2.56	29	1.39	63	2.96	535	21.88	545	20.36	394	17.41	77	3.22	152	5.42	37	1.94	635	30.16	311	11.82	915	42.22	359	15.82	28	1.29	232	10.22	45	2.13	6	0.26	34	1.62	391	15.68	380	16.59	433	20.17	524	23.63	849	38.16	640	27.14	10
BMK_Unigene_080083	394	21.84	328	18.32	456	24.98	2715	129.75	2733	119.52	1867	96.38	143	7	363	15.12	148	9.1	1984	110.11	1214	53.82	2918	157.28	128	6.59	157	8.44	243	12.52	260	14.39	39	1.94	107	5.96	1940	90.93	1690	86.27	1843	100.34	1667	87.75	2236	117.44	1282	63.49	158
BMK_Unigene_075951	1	0.04	4	0.17	6	0.28	2679	96.34	3718	121.96	1576	61.23	49	1.84	416	13.05	7	0.32	2304	96.24	845	28.3	3587	145.6	197	7.67	14	0.6	272	10.54	138	5.77	0	0.04	28	1.19	4972	175.22	3463	132.88	4222	172.97	5759	228.54	6056	239.37	4580	170.84	9
BMK_Unigene_116378	6	0.48	0	0	0	0	0	0	0	0	0	0	372	26.54	581	35.19	198	17.8	0	0	0	0	0	0	21	1.57	9	0.7	4	0.3	42	3.39	25	1.82	8	0.65	0	0	0	0	0	0	0	0	0	0	0	0	4
BMK_Unigene_155053	48	1.34	50	1.41	32	0.91	4555	109.12	5540	120.72	4349	112.59	11	0.28	56	1.19	8	0.25	3372	93.84	1253	28.04	5992	162.17	404	10.46	46	1.26	622	16.03	359	9.95	56	1.41	68	1.89	1508	35.4	1313	33.54	1597	43.6	1351	35.81	1550	40.83	1181	29.38	4
BMK_Unigene_084167	303	12.65	411	17.3	380	15.7	371	13.34	582	19.09	345	13.4	943	34.69	882	27.63	675	31.15	419	17.49	2561	85.65	609	24.71	707	27.43	421	17.02	438	16.95	606	25.2	670	25.01	543	22.72	491	17.31	409	15.7	467	19.13	893	35.44	537	21.24	572	21.36	640
BMK_Unigene_324326	7	0.35	0	0	0	0	0	0	0	0	0	0	211	9.21	81	3.01	31	1.7	0	0	0	0	0	0	0	0	4	0.19	0	0	9	0.44	5	0.22	1	0.05	0	0	0	0	0	0	0	0	0	0	0	0	4
BMK_Unigene_130416	3	0.26	0	0	4	0.34	0	0	0	0	1	0.08	668	51.72	1095	71.92	309	30.16	0	0	0	0	0	0	27	2.18	14	1.19	0	0	67	5.86	45	3.55	15	1.32	0	0	1	0.08	0	0	0	0	0	0	0	0	5
BMK_Unigene_081505	1587	77.71	1400	69.08	1760	85.18	1360	57.38	1130	43.56	954	43.48	442	19.09	601	22.1	534	28.96	940	46.06	516	20.23	692	32.94	371	16.86	914	43.35	736	33.45	1029	50.24	1052	46.15	976	47.97	1073	44.38	853	38.42	878	42.2	473	22	524	24.3	615	26.9	531
BMK_Unigene_081386	268	9.58	292	10.53	300	10.6	101	3.13	81	2.29	81	2.69	100	3.15	181	4.85	117	4.61	79	2.84	168	4.82	39	1.36	70	2.33	117	4.04	110	3.67	123	4.39	233	7.45	82	2.95	114	3.43	79	2.59	80	2.82	94	3.19	63	2.15	101	3.24	67
BMK_Unigene_070928	130	18.2	137	19.17	169	23.28	15	1.82	17	1.92	66	8.64	159	19.93	256	27.09	188	29.87	51	7.18	18	1.99	5	0.68	0	0	68	9.27	55	7.26	36	5.1	44	5.64	50	7.15	34	4.06	82	10.69	33	4.56	16	2.11	7	0.93	36	4.5	107
BMK_Unigene_138002	0	0	0	0	0	0	0	0	0	0	0	0	21	0.56	73	1.66	243	8.11	0	0	0	0	0	0	0	0	0	0	0	0	0	0	16	0.43	0	0	0	0	0	0	0	0	0	0	0	0	0	0	0
BMK_Unigene_074764	99	9.04	116	10.63	140	12.61	209	16.49	119	8.66	404	34.41	221	17.92	276	18.98	170	17.38	191	17.49	69	5.01	173	15.36	80	6.77	78	6.92	85	7.26	80	7.33	81	6.69	99	9.15	69	5.35	251	21.2	109	9.79	42	3.63	71	6.15	101	8.24	108
BMK_Unigene_133866	8	0.72	0	0	9	0.8	0	0	0	0	0	0	1642	130.65	3088	208.38	927	92.99	0	0	0	0	0	0	126	10.46	60	5.22	7	0.59	217	19.52	190	15.4	60	5.44	0	0	0	0	0	0	0	0	0	0	0	0	21
[truncated: 217 more columns]
