# Supplementary material
Source: MDPI journal article supplement (https://www.mdpi.com/1999-4907/15/4/618)
Supplement: s1 [file s1 › Supplementary Table S6.xlsx]

## Sheet: Sheet1
Supplementary Table S6: The DEGs in the pathway of Pentose and Glucuronate Interconversion
#ID	GGr-1_count	GGr-1_FPKM	GGr-2_count	GGr-2_FPKM	GGr-3_count	GGr-3_FPKM	GGs-1_count	GGs-1_FPKM	GGs-2_count	GGs-2_FPKM	GGs-3_count	GGs-3_FPKM	GSr-1_count	GSr-1_FPKM	GSr-2_count	GSr-2_FPKM	GSr-3_count	GSr-3_FPKM	GSs-1_count	GSs-1_FPKM	GSs-2_count	GSs-2_FPKM	GSs-3_count	GSs-3_FPKM	SGr-1_count	SGr-1_FPKM	SGr-2_count	SGr-2_FPKM	SGr-3_count	SGr-3_FPKM	SGr2-1_count	SGr2-1_FPKM	SGr2-2_count	SGr2-2_FPKM	SGr2-3_count	SGr2-3_FPKM	SGs-1_count	SGs-1_FPKM	SGs-2_count	SGs-2_FPKM	SGs-3_count	SGs-3_FPKM	SGs2-1_count	SGs2-1_FPKM	SGs2-2_count	SGs2-2_FPKM	SGs2-3_count	SGs2-3_FPKM	SSr-1_count
BMK_Unigene_149822	5540	326.55	7234	429.31	6598	384.22	1024	52.04	1112	51.75	1006	55.22	5855	304.9	7686	340.42	6293	411.87	1050	61.97	1092	51.43	569	32.61	608	33.25	3532	201.8	2251	123.38	2454	144.47	5298	280.45	2774	164.43	1784	88.93	1419	77.04	1248	72.25	183	10.24	154	8.6	690	36.33	2752
BMK_Unigene_131460	2	0.13	0	0	1	0.06	0	0	0	0	0	0	192	10.83	233	11.17	140	9.93	0	0	0	0	0	0	0	0	10	0.62	1	0.06	94	5.99	39	2.24	17	1.09	0	0	0	0	0	0	0	0	0	0	0	0	9
BMK_Unigene_081631	110	3.37	119	3.66	147	4.46	123	3.23	112	2.69	127	3.6	1384	37.07	1593	36.38	759	25.49	125	3.83	2231	54.56	133	3.96	547	15.49	160	4.72	540	15.22	259	7.86	318	8.64	220	6.72	798	20.49	586	16.39	617	18.45	1414	40.96	926	26.69	889	24.2	1134
BMK_Unigene_141997	0	0	0	0	0	0	0	0	0	0	0	0	400	61.5	3912	506.24	608	118.89	0	0	4210	563.84	8	1.33	790	124.57	1	0.17	5	0.81	1	0.17	0	0	0	0	0	0	26	4.15	0	0	1	0.16	0	0	0	0	21
BMK_Unigene_073902	990	27.31	1946	54.19	789	21.53	244	5.79	243	5.26	96	2.48	312	7.56	370	7.67	271	8.23	157	4.34	347	7.7	35	0.96	5	0.13	93	2.48	38	0.99	46	1.26	29	0.71	14	0.39	238	5.54	79	2	127	3.45	8	0.23	8	0.22	24	0.59	0
BMK_Unigene_129402	23	6.96	25	7.45	23	6.8	5	1.32	0	0	1	0.29	0	0	0	0	0	0	1	0.31	3	0.7	0	0	0	0	4	1.19	6	1.76	44	13.85	12	3.46	37	11.81	0	0	0	0	0	0	0	0	0	0	0	0	0
BMK_Unigene_078327	30	1.02	16	0.55	63	2.12	2750	80.56	2924	78.02	2491	78.85	24	0.72	4	0.1	14	0.53	4441	151.12	436	11.91	2132	70.54	6	0.19	3	0.1	0	0	2	0.07	0	0	6	0.2	4	0.11	0	0	4	0.13	0	0	4	0.13	3	0.09	0
BMK_Unigene_079350	3014	146.88	2720	133.59	2873	138.39	516	21.67	246	9.44	389	17.64	1145	49.22	918	33.59	1233	66.54	579	28.24	405	15.8	122	5.78	211	9.54	942	44.47	645	29.18	437	21.23	1071	46.76	564	27.59	848	34.91	604	27.08	686	32.82	154	7.13	134	6.18	340	14.8	896
BMK_Unigene_148299	4	0.2	12	0.6	4	0.19	0	0	0	0	0	0	60	2.61	224	8.3	83	4.53	0	0	439	17.33	0	0	38	1.74	3	0.14	7	0.32	5	0.25	8	0.35	10	0.5	0	0	0	0	0	0	0	0	0	0	0	0	20
BMK_Unigene_137601	0	0	0	0	0	0	0	0	0	0	0	0	46	3.23	104	6.21	82	7.26	0	0	0	0	0	0	2	0.15	13	1	1	0.07	76	6.04	6	0.43	36	2.88	0	0	0	0	0	0	0	0	0	0	0	0	4
BMK_Unigene_154600	254	7.62	294	8.92	287	8.51	272	7.03	222	5.21	297	8.3	629	16.59	661	14.87	400	13.22	230	6.89	4915	118.3	382	11.13	1314	36.59	312	9.07	814	22.59	474	14.13	696	18.62	398	11.93	349	8.83	318	8.75	236	6.94	576	16.45	377	10.7	444	11.9	489
BMK_Unigene_146790	99	6.41	174	11.29	131	8.38	36	2.05	23	1.18	32	1.94	182	10.4	468	22.65	256	18.35	17	1.11	24	1.27	0	0.02	96	5.76	79	4.96	174	10.45	102	6.62	84	4.88	44	2.88	167	9.15	117	6.99	82	5.22	28	1.75	7	0.45	167	9.61	144
BMK_Unigene_103108	3	0.33	0	0	0	0	0	0	0	0	0	0	168	16.58	281	23.47	98	12.22	0	0	0	0	0	0	11	1.13	19	2.05	2	0.21	109	12.16	15	1.51	60	6.75	0	0	0	0	0	0	0	0	0	0	0	0	11
BMK_Unigene_145550	1231	55.37	960	43.54	492	21.87	425	16.46	601	21.26	272	11.41	110	4.36	115	3.88	212	10.57	339	15.26	1340	48.28	229	10.01	149	6.25	220	9.58	248	10.38	145	6.5	85	3.45	141	6.4	257	9.77	264	10.94	197	8.7	147	6.31	285	12.17	141	5.7	101
BMK_Unigene_075953	644	46.42	988	71.61	281	20	2392	148.77	2611	149.17	2403	161.4	1656	105.68	3991	216.35	560	44.98	2015	145.53	4155	238.77	2356	165.11	1295	86.55	1069	74.75	2868	192.66	935	67.45	1085	70.46	1331	96.72	2464	150.43	2110	140.34	2257	159.9	4563	311.87	3670	250.83	2830	182.19	967
BMK_Unigene_076398	204	6.82	186	6.28	115	3.81	309	8.9	379	9.94	203	6.32	12	0.35	18	0.45	18	0.66	11	0.37	97	2.6	15	0.49	16	0.5	32	1.04	21	0.65	176	5.86	269	8.03	140	4.69	6	0.17	0	0	0	0	2	0.06	1	0.03	4	0.12	1
BMK_Unigene_077193	3	0.11	6	0.22	0	0	14	0.44	0	0	15	0.51	836	26.79	287	7.84	122	4.9	0	0	0	0	0	0	229	7.74	408	14.38	290	9.78	375	13.58	124	4.03	235	8.57	29	0.89	26	0.87	14	0.5	26	0.9	27	0.93	21	0.68	2712
BMK_Unigene_064015	60	2.63	178	7.88	57	2.47	3	0.11	0	0	0	0	24	0.93	13	0.43	5	0.24	0	0	1	0.04	0	0	0	0	5	0.21	0	0	3	0.13	5	0.2	0	0	0	0	0	0	0	0	0	0	0	0	0	0	12
BMK_Unigene_082937	960	32.77	1397	48.12	1399	47.24	1148	33.73	975	26.09	281	8.92	861	25.86	1378	35.28	776	29.22	408	13.92	502	13.75	229	7.6	85	2.7	267	8.82	96	3.03	139	4.72	181	5.52	126	4.3	269	7.74	104	3.26	119	3.98	23	0.75	13	0.42	23	0.7	33
BMK_Unigene_080406	391	17.48	403	18.16	317	14.01	73	2.81	30	1.05	75	3.12	904	35.62	716	24.03	998	49.35	111	4.96	72	2.58	29	1.26	24	1	80	3.46	387	16.05	82	3.65	230	9.2	72	3.23	240	9.06	216	8.88	176	7.72	122	5.18	97	4.11	69	2.76	548
BMK_Unigene_137434	0	0	0	0	0	0	0	0	0	0	0	0	40	2.97	122	7.69	27	2.53	0	0	0	0	0	0	6	0.47	5	0.41	0	0	18	1.51	11	0.83	2	0.17	0	0	0	0	0	0	0	0	0	0	0	0	5
BMK_Unigene_136842	110	7.15	181	11.84	128	8.22	113	6.34	104	5.35	52	3.15	230	13.22	289	14.12	209	15.11	9	0.59	31	1.61	12	0.76	0	0	29	1.83	6	0.36	14	0.91	18	1.05	7	0.46	95	5.23	77	4.61	111	7.09	4	0.25	11	0.68	6	0.35	19
BMK_Unigene_075348	234	11.54	292	14.52	238	11.6	50	2.13	56	2.21	110	5.06	78	3.43	174	6.45	92	5.05	68	3.38	61	2.43	7	0.34	340	15.58	155	7.43	136	6.23	218	10.74	119	5.27	228	11.31	28	1.18	29	1.34	28	1.37	6	0.31	23	1.09	34	1.54	30
BMK_Unigene_148673	5675	202.38	6469	232.77	5018	176.99	2349	72.11	2928	81.89	2984	98.98	3634	114.06	5080	135.9	3233	127.23	2195	78.27	2351	67.27	1443	50.02	760	25.17	2318	80.01	2057	67.94	2032	72.1	2171	69.14	2246	80.18	2922	87.89	2778	90.96	2088	73.04	2851	96.67	2091	70.56	1588	50.59	1621
BMK_Unigene_149558	137	5.19	229	8.76	161	6.04	72	2.35	48	1.43	32	1.13	240	8.01	387	11.01	187	7.83	33	1.25	1	0.03	58	2.14	45	1.58	371	13.62	571	20.06	152	5.74	514	17.41	157	5.96	579	18.52	401	13.96	381	14.17	854	30.78	512	18.37	257	8.7	148
BMK_Unigene_148583	484	19.8	252	10.4	179	7.24	209	7.36	214	6.88	220	8.38	349	12.58	547	16.8	124	5.61	220	9	176	5.77	212	8.43	101	3.84	289	11.45	241	9.14	221	9.01	455	16.65	303	12.42	38	1.31	38	1.43	53	2.13	32	1.24	30	1.16	39	1.43	66
BMK_Unigene_074474	433	14.94	684	23.78	455	15.51	575	17.05	562	15.18	624	20	3408	103.29	3646	94.2	1586	60.25	395	13.63	934	25.83	506	16.94	2242	71.73	931	31.04	1661	52.99	1507	51.65	1061	32.65	1410	48.61	1547	44.93	1351	42.72	1322	44.67	1482	48.56	1347	43.92	1668	51.33	4771
BMK_Unigene_080332	625	22.59	618	22.53	676	24.17	494	15.36	451	12.78	459	15.42	2225	70.72	3884	105.19	995	39.67	456	16.49	2785	80.67	474	16.64	1117	37.46	763	26.68	750	25.1	914	32.84	954	30.77	726	26.26	1019	31.06	739	24.53	843	29.88	1604	55.07	1277	43.63	1041	33.58	1486
BMK_Unigene_142845	189	11.31	191	11.51	198	11.71	6991	360.72	8263	390.56	5299	295.32	1775	93.86	2450	110.18	1655	110	6344	380.14	2748	131.39	9179	534.05	6973	387.14	1077	62.48	3297	183.5	3673	219.57	1398	75.15	4005	241.07	2221	112.42	2052	113.13	2011	118.21	2923	166.03	3385	191.95	3494	186.77	5385
BMK_Unigene_145532	588	26.4	627	28.38	562	24.95	128	4.95	112	3.95	101	4.22	376	14.88	364	12.27	537	26.67	76	3.41	56	2.01	25	1.09	78	3.25	102	4.44	207	8.62	90	4.03	141	5.67	115	5.18	356	13.5	224	9.25	144	6.35	59	2.52	75	3.19	272	10.91	142
BMK_Unigene_077114	13	1.83	6	0.85	20	2.77	19	2.37	14	1.62	25	3.3	128	16.16	221	23.55	73	11.68	61	8.7	51	5.69	26	3.62	257	33.51	46	6.32	153	20.41	122	17.48	64	8.38	155	22.39	28	3.37	44	5.78	38	5.29	62	8.24	66	8.86	66	8.31	444
BMK_Unigene_150714	836	22.06	664	17.7	644	16.82	631	14.33	735	15.17	880	21.59	773	17.93	1540	30.47	668	19.41	1099	28.99	877	18.6	921	23.63	804	19.72	490	12.51	465	11.35	615	16.13	456	10.72	537	14.16	667	14.83	559	13.53	633	16.38	471	11.83	862	21.52	743	17.52	777
BMK_Unigene_082716	591	20.44	512	17.87	689	23.57	165	4.91	146	3.96	189	6.08	84	2.56	21	0.54	157	5.99	96	3.32	64	1.78	67	2.25	111	3.57	360	12.05	154	4.93	194	6.67	253	7.81	297	10.28	25	0.73	57	1.81	25	0.85	3	0.1	27	0.88	12	0.37	0
BMK_Unigene_148276	563	20.67	838	31.07	551	20.03	1024	32.39	765	22.06	907	30.99	2028	65.55	2153	59.3	927	37.6	682	25.04	1609	47.39	807	28.83	3125	106.57	1313	46.68	1878	63.87	2077	75.89	1339	43.91	1869	68.73	1023	31.71	807	27.23	860	30.98	929	32.43	965	33.53	949	31.14	2614
BMK_Unigene_077389	278	10.31	301	11.24	173	6.35	122	3.89	185	5.39	110	3.81	59	1.92	64	1.79	106	4.35	82	3.05	342	10.18	72	2.62	41	1.43	67	2.43	80	2.76	53	1.97	28	0.94	41	1.52	128	4.01	105	3.6	112	4.08	87	3.08	119	4.19	94	3.11	108
BMK_Unigene_072662	412	67.05	608	98.67	527	84.3	28	3.96	5	0.66	63	9.6	62	9.07	84	10.35	118	21.93	67	10.98	336	42.92	9	1.42	2	0.3	49	7.78	34	5.24	26	4.3	10	1.5	38	6.35	169	23.55	23	3.5	40	6.43	2	0.31	0	0	27	3.92	1
BMK_Unigene_148457	60	4.47	63	4.79	50	3.68	256	16.5	309	18.3	214	14.9	153	10.15	220	12.33	102	8.47	346	25.83	2260	134.22	777	56.29	415	28.66	72	5.25	593	41.19	172	12.9	176	11.82	117	8.79	298	18.81	390	26.83	290	21.24	302	21.39	436	30.8	302	20.09	439
BMK_Unigene_078754	1074	48.93	895	41.07	1144	51.5	555	21.78	620	22.21	705	29.89	174	7.02	298	10.2	173	8.73	577	26.3	475	17.33	349	15.45	350	14.82	671	29.61	377	15.96	573	26.02	616	25.13	520	23.75	156	6.01	136	5.71	105	4.72	65	2.84	79	3.41	109	4.45	144
BMK_Unigene_141245	693	104.5	997	150.09	1026	152.17	161	21.06	122	14.92	128	18.06	2331	315.26	3174	361.98	520	89.25	586	88.94	2665	316.08	177	25.96	2190	305.05	757	111.28	826	117.67	1842	281.66	3617	500.97	8110	1252.13	208	26.82	124	17.44	151	22.48	856	121.67	616	88.48	630	84.82	524
BMK_Unigene_139555	44	6.67	37	5.6	26	3.88	76	10.08	79	9.81	77	10.92	37	5.03	39	4.58	9	1.55	102	15.67	242	28.95	133	19.7	831	116.49	97	14.34	304	43.63	320	49.29	184	25.64	452	70.27	9	1.17	14	1.98	7	1.05	20	2.86	13	1.88	24	3.25	106
BMK_Unigene_077463	209	11.53	172	9.55	171	9.32	480	22.81	414	18.01	443	22.74	161	7.84	300	12.43	181	11.07	243	13.41	705	31.09	318	17.05	582	29.78	418	22.34	342	17.53	408	22.46	279	13.8	309	17.12	247	11.51	202	10.26	179	9.69	190	9.95	197	10.29	189	9.31	213
BMK_Unigene_153645	1719	74.18	1747	76.01	1997	85.2	953	35.42	1028	34.87	5693	228.59	820	31.18	827	26.79	808	38.55	2736	118.11	885	30.6	366	15.35	182	7.29	3953	165.19	2163	86.56	718	30.87	957	36.95	914	39.54	1371	49.94	502	19.91	1174	49.72	141	5.78	429	17.53	628	24.21	4942
BMK_Unigene_076677	170	9.53	615	34.71	187	10.36	0	0	0	0	0	0	404	20	58	2.44	135	8.4	0	0	0	0	0	0	0	0	10	0.54	1	0.05	94	5.26	60	3.02	31	1.75	0	0	5	0.26	4	0.22	9	0.48	2	0.11	5	0.25	148
BMK_Unigene_077993	25	1.16	31	1.45	20	0.92	289	11.55	315	11.51	263	11.35	13	0.53	106	3.68	18	0.94	199	9.24	262	9.74	143	6.47	136	5.86	52	2.34	86	3.7	71	3.28	45	1.87	72	3.35	69	2.73	37	1.61	55	2.51	44	1.98	72	3.18	76	3.16	19
BMK_Unigene_145943	7	0.36	3	0.15	4	0.2	1	0.04	0	0	1	0.05	121	5.46	202	7.75	38	2.15	1	0.05	3	0.12	0	0	13	0.62	9	0.45	12	0.57	0	0	8	0.37	61	3.13	76	3.28	181	8.51	130	6.52	43	2.09	10	0.48	167	7.62	18
BMK_Unigene_151340	7	0.34	7	0.34	15	0.71	2232	92.13	2536	95.63	2579	115	154	6.51	166	5.97	10	0.53	2787	133.6	98	3.76	5297	246.71	83	3.69	12	0.56	179	7.96	34	1.62	23	0.99	32	1.54	2614	105.78	657	28.95	1736	81.64	3503	159.43	3266	148.17	1282	54.86	754
BMK_Unigene_147800	118	6.23	602	32.02	76	3.97	3	0.14	3	0.12	0	0	119	5.55	124	4.92	111	6.5	1	0.05	159	6.72	3	0.15	4	0.2	12	0.61	49	2.4	46	2.42	75	3.55	17	0.9	12	0.54	32	1.56	31	1.61	21	1.05	20	1	21	0.99	15
BMK_Unigene_151879	1006	51.37	1136	58.45	913	46.08	1300	57.2	1005	40.43	519	24.67	322	14.51	303	11.62	320	18.11	409	20.9	227	9.28	285	14.15	85	4.03	274	13.56	171	8.11	303	15.43	227	10.39	200	10.25	235	10.14	132	6.2	160	8.02	35	1.7	58	2.81	66	3.01	62
BMK_Unigene_127276	1	0.08	0	0	0	0	0	0	0	0	0	0	152	10.61	366	21.7	76	6.68	0	0	0	0	0	0	0	0	11	0.84	0	0	41	3.24	23	1.64	65	5.17	0	0	0	0	0	0	0	0	0	0	0	0	3
BMK_Unigene_073232	8	0.41	1	0.05	46	2.33	31	1.37	41	1.66	40	1.91	152	6.87	251	9.66	169	9.6	1	0.05	2	0.08	1	0.05	4	0.19	3	0.15	9	0.43	0	0	5	0.23	6	0.31	99	4.29	46	2.17	33	1.66	23	1.12	22	1.07	20	0.92	42
BMK_Unigene_154667	535	19.55	382	14.09	402	14.53	3978	125.17	4405	126.31	2956	100.49	735	23.65	1564	42.89	393	15.85	3078	112.49	2014	59.05	3432	121.94	1080	36.66	796	28.16	1030	34.87	1026	37.32	763	24.91	846	30.96	2782	85.77	2290	76.86	2401	86.08	3014	104.74	3023	104.56	2711	88.51	1544
[truncated: 217 more columns]
