# Supplementary material
Source: MDPI journal article supplement (https://www.mdpi.com/1999-4907/15/4/618)
Supplement: s1 [file s1 › Supplementary Table S7.xlsx]

## Sheet: Sheet1
Supplementary Table S7:The DEGs in the pathway of Phenylpropanoid Biosynthesis
#ID	GGr-1_count	GGr-1_FPKM	GGr-2_count	GGr-2_FPKM	GGr-3_count	GGr-3_FPKM	GGs-1_count	GGs-1_FPKM	GGs-2_count	GGs-2_FPKM	GGs-3_count	GGs-3_FPKM	GSr-1_count	GSr-1_FPKM	GSr-2_count	GSr-2_FPKM	GSr-3_count	GSr-3_FPKM	GSs-1_count	GSs-1_FPKM	GSs-2_count	GSs-2_FPKM	GSs-3_count	GSs-3_FPKM	SGr-1_count	SGr-1_FPKM	SGr-2_count	SGr-2_FPKM	SGr-3_count	SGr-3_FPKM	SGr2-1_count	SGr2-1_FPKM	SGr2-2_count	SGr2-2_FPKM	SGr2-3_count	SGr2-3_FPKM	SGs-1_count	SGs-1_FPKM	SGs-2_count	SGs-2_FPKM	SGs-3_count	SGs-3_FPKM	SGs2-1_count	SGs2-1_FPKM	SGs2-2_count	SGs2-2_FPKM	SGs2-3_count	SGs2-3_FPKM	SSr-1_count
BMK_Unigene_156744	2224	45.38	2038	42.03	2170	43.82	2416	42.4	2468	39.32	2525	47.89	6445	115.45	8090	123.7	2789	62.55	2188	44.61	3401	55.84	2048	40.63	5446	103.29	2349	46.35	2284	43.05	2448	49.58	2346	42.59	2182	44.44	2399	41.22	2359	44.12	1885	37.71	1937	37.64	1897	36.6	2387	43.52	3355
BMK_Unigene_156542	1402	38.49	1027	28.47	1285	34.9	282	6.66	150	3.22	606	15.47	738	17.81	1217	25.05	521	15.75	416	11.41	419	9.24	107	2.86	306	7.81	988	26.24	722	18.33	1282	34.97	1328	32.49	1094	30.02	523	12.1	560	14.1	611	16.45	1293	33.77	531	13.79	882	21.63	1261
BMK_Unigene_156005	183	6.74	233	8.66	122	4.43	123	3.91	103	2.98	344	11.75	319	10.32	297	8.18	139	5.67	130	4.79	595	17.53	75	2.68	4047	138.02	264	9.39	184	6.28	829	30.3	431	14.16	1003	36.89	23	0.72	29	1	13	0.48	7	0.24	11	0.38	37	1.23	66
BMK_Unigene_154370	4	0.3	28	2.12	3	0.22	29	1.88	36	2.15	67	4.69	6655	443.22	10735	607.15	1110	93.06	60	4.52	365	21.87	70	5.12	748	52.2	2	0.15	214	15	69	5.19	50	3.39	52	3.94	279	17.77	413	28.66	250	18.48	1012	72.2	229	16.33	316	21.22	594
BMK_Unigene_153447	121	4.25	80	2.83	112	3.89	9	0.27	7	0.19	4	0.13	169	5.22	251	6.61	224	8.67	23	0.81	38	1.07	125	4.26	2	0.07	107	3.63	111	3.61	71	2.48	85	2.66	90	3.16	89	2.63	65	2.09	64	2.2	45	1.5	98	3.25	48	1.5	263
BMK_Unigene_153289	2	0.16	1	0.08	4	0.31	1	0.07	2	0.13	5	0.37	1740	122.64	2412	144.29	968	85.9	13	1.04	5726	362.33	166	12.83	17	1.25	1	0.08	25	1.85	53	4.22	201	14.42	20	1.6	42	2.83	9	0.66	20	1.56	126	9.49	29	2.26	16	1.14	7
BMK_Unigene_152464	1138	47.18	621	25.96	995	40.79	172	6.15	134	4.38	413	15.95	154	5.63	397	12.37	64	2.97	309	12.84	450	14.97	220	8.89	183	7.06	902	36.19	250	9.64	917	37.88	807	29.92	780	32.42	183	6.43	92	3.52	180	7.35	170	6.7	101	3.97	207	7.66	364
BMK_Unigene_151702	129	3.82	177	5.31	134	3.94	122	3.13	91	2.11	83	2.3	627	16.36	841	18.71	487	15.92	151	4.48	223	5.33	125	3.62	71	1.96	185	5.31	326	8.94	137	4.04	285	7.54	218	6.46	587	14.67	372	10.14	481	13.98	462	13.05	374	10.51	507	13.43	327
BMK_Unigene_151424	3730	147.88	2913	116.46	3619	141.88	773	26.41	509	15.86	768	28.34	1565	54.66	1853	55.11	664	29.11	717	28.46	2624	83.41	561	21.64	1878	69.13	3705	142.18	1451	53.32	6108	241.03	4326	153.28	5330	211.66	461	15.45	246	8.97	454	17.68	601	22.65	188	7.08	593	21	686
BMK_Unigene_150550	57	2.9	26	1.36	43	2.19	0	0	1	0.04	2	0.09	163	7.26	240	9.09	122	6.82	0	0	1	0.04	0	0	1	0.05	10	0.5	15	0.75	7	0.4	39	1.78	24	1.22	111	4.74	64	2.97	88	4.4	0	0	1	0.05	53	2.39	6
BMK_Unigene_150265	126	6.16	213	10.55	102	4.93	618	26.04	709	27.32	392	17.84	165	7.12	213	7.82	21	1.14	582	28.48	4229	165.58	914	43.49	693	31.46	150	7.11	1323	60.06	329	16.04	196	8.63	240	11.78	2365	97.71	1396	62.8	1918	92.08	3029	140.72	3211	148.72	1704	74.44	41
BMK_Unigene_150140	614	40.82	530	35.45	464	30.46	29	1.66	36	1.89	24	1.49	339	19.93	911	45.53	408	30.18	54	3.6	11	0.58	32	2.07	103	6.35	218	14.05	141	8.73	240	15.95	117	7	186	12.45	89	5.01	80	4.9	49	3.2	19	1.2	23	1.45	93	5.52	192
BMK_Unigene_149425	68	1.79	96	2.56	102	2.65	91	2.06	59	1.23	69	1.7	400	9.22	427	8.4	303	8.76	64	1.7	55	1.17	38	0.99	148	3.61	49	1.26	200	4.86	83	2.16	133	3.12	109	2.85	229	5.07	265	6.37	170	4.37	83	2.09	113	2.81	305	7.14	254
BMK_Unigene_147989	348	18.25	597	31.54	180	9.33	429	19.39	701	28.97	183	8.93	9097	420.97	13848	545.36	2997	174.19	391	20.52	9486	397.92	812	41.39	1527	74.31	478	24.28	774	37.7	3528	184.56	7715	362.73	1372	72.25	12	0.53	75	3.62	5	0.26	316	15.74	80	3.97	86	4.03	4
BMK_Unigene_147882	3	0.24	19	1.53	14	1.11	2	0.14	5	0.32	0	0	70	4.97	101	6.09	72	6.44	0	0	199	12.69	0	0	401	29.77	6	0.47	19	1.42	64	5.14	3067	221.73	37	2.99	16	1.09	7	0.52	3	0.24	850	64.51	265	20.13	354	25.32	0
BMK_Unigene_145760	355	28.21	479	38.25	318	24.94	155	10.63	82	5.18	155	11.48	349	24.58	543	32.47	299	26.53	154	12.27	72	4.56	18	1.39	18	1.33	225	17.35	263	19.5	221	17.6	307	22.02	219	17.57	127	8.56	327	24	146	11.41	76	5.72	110	8.29	194	13.77	72
BMK_Unigene_145622	1403	81.13	1539	89.61	1303	74.44	93	4.64	127	5.8	84	4.52	4263	217.74	3248	141.11	2161	138.7	20	1.16	37	1.71	8	0.45	124	6.65	1337	74.93	505	27.15	1290	74.49	1663	86.33	1108	64.41	773	37.8	296	15.76	692	39.3	1418	77.83	471	25.8	672	34.71	2883
BMK_Unigene_145543	0	0	0	0	0	0	0	0	0	0	1	0.04	764	28.1	871	27.3	144	6.66	3	0.13	26	0.87	1	0.05	51	2.01	0	0	4	0.18	10	0.42	8	0.3	5	0.23	8	0.28	14	0.54	10	0.44	30	1.19	11	0.45	16	0.63	47
BMK_Unigene_145098	68	5.36	102	8.08	72	5.6	4	0.27	3	0.19	1	0.07	15	1.05	24	1.42	2	0.18	0	0	4	0.25	0	0	5	0.37	23	1.76	23	1.69	49	3.87	41	2.92	123	9.79	12	0.8	8	0.58	15	1.16	53	3.96	18	1.35	35	2.47	17
BMK_Unigene_144351	341	23.02	385	26.15	354	23.6	181	10.54	265	14.16	196	12.33	792	47.31	1552	78.79	510	38.32	417	28.2	725	39.06	844	55.4	191	11.96	256	16.76	349	21.94	153	10.33	304	18.47	139	9.45	704	40.24	538	33.5	654	43.39	392	25.11	624	39.94	616	37.15	344
BMK_Unigene_143615	37	3.96	14	1.5	43	4.53	59	5.46	49	4.2	36	3.6	142	13.53	216	17.43	86	10.35	54	5.8	35	2.97	19	1.98	0	0	17	1.77	65	6.52	9	0.97	19	1.85	18	1.96	3	0.27	10	0.99	0	0	0	0	3	0.3	3	0.29	20
BMK_Unigene_143441	8	1.49	30	5.56	34	6.22	5	0.81	3	0.46	4	0.7	13	2.19	445	62.88	15	3.21	0	0	3	0.44	5	0.91	0	0	6	1.09	9	1.59	0	0	2	0.35	2	0.38	364	58.24	378	66.03	106	19.54	13	2.28	1	0.18	229	38.1	10
BMK_Unigene_142970	787	69.54	820	72.75	746	65.03	161	12.29	125	8.8	155	12.77	323	25.34	304	20.23	506	50.03	121	10.72	97	6.81	25	2.15	57	4.67	243	20.85	178	14.7	204	18.09	129	10.31	196	17.52	432	32.39	221	18.06	313	27.21	43	3.6	92	7.72	150	11.84	81
BMK_Unigene_142933	362	27.02	287	21.53	370	27.26	88	5.67	51	3.02	247	17.18	38	2.51	46	2.58	15	1.25	118	8.83	184	10.94	61	4.43	85	5.88	225	16.29	131	9.12	235	17.56	342	23.01	205	15.43	27	1.71	17	1.17	33	2.42	41	2.9	29	2.05	39	2.6	35
BMK_Unigene_141955	3178	122.36	2485	96.51	3209	122.19	361	11.97	395	11.94	445	15.94	293	9.93	758	21.9	484	20.58	245	9.43	128	3.95	84	3.14	275	9.83	1443	53.78	653	23.3	1083	41.51	1445	49.72	1012	39.03	75	2.44	83	2.94	109	4.12	54	1.98	38	1.38	105	3.61	94
BMK_Unigene_141755	0	0	2	0.16	1	0.08	53	3.6	68	4.25	181	13.28	4	0.28	5	0.3	1	0.09	49	3.87	31	1.94	1	0.08	3	0.22	0	0	1	0.07	32	2.52	0	0	3	0.24	1069	71.32	1395	101.41	1975	152.84	118	8.8	131	9.78	78	5.48	1
BMK_Unigene_141714	2253	187	1898	158.26	2502	204.92	128	9.17	23	1.52	64	4.95	93	6.85	333	20.8	153	14.19	16	1.33	63	4.16	4	0.32	88	6.77	846	68.17	486	37.66	1593	132.58	700	52.48	1233	103.4	868	61.1	395	30.3	854	69.71	58	4.56	78	6.14	481	35.66	84
BMK_Unigene_141409	269	24.26	778	70.45	637	56.68	92	7.17	78	5.61	405	34.07	197	15.78	126	8.56	70	7.07	190	17.19	37	2.65	4	0.35	32	2.67	70	6.13	15	1.26	62	5.61	41	3.35	57	5.2	45	3.45	55	4.59	43	3.82	1	0.09	12	1.03	41	3.3	90
BMK_Unigene_140343	568	46.3	638	52.25	459	36.93	26	1.83	18	1.17	19	1.44	979	70.77	615	37.73	806	73.4	12	0.98	20	1.3	11	0.87	77	5.82	389	30.78	207	15.75	886	72.4	1068	78.62	665	54.75	397	27.44	198	14.91	401	32.15	569	43.95	167	12.92	518	37.71	768
BMK_Unigene_139492	958	65.33	1344	92.19	1209	81.41	55	3.24	32	1.73	101	6.42	1316	79.4	1820	93.31	1365	103.61	17	1.16	5154	280.39	91	6.03	224	14.17	848	56.08	744	47.25	394	26.87	334	20.5	435	29.88	349	20.15	470	29.56	322	21.58	93	6.02	54	3.49	520	31.67	2819
BMK_Unigene_139384	0	0	0	0	0	0	12	0.98	1	0.08	7	0.62	0	0	0	0	0	0	66	6.27	138	10.38	30	2.76	0	0	0	0	1	0.09	0	0	0	0	0	0	5	0.4	8	0.7	7	0.65	0	0	1	0.09	8	0.68	0
BMK_Unigene_139134	0	0	0	0	0	0	0	0	0	0	0	0	431	11.95	2613	61.64	30	1.05	1	0.04	5	0.15	0	0	0	0	0	0	28	0.84	0	0	0	0	0	0	72	1.92	88	2.56	19	0.61	7	0.23	5	0.15	57	1.62	97
BMK_Unigene_138277	93	8.67	119	11.14	148	13.62	6	0.48	18	1.34	10	0.87	115	9.53	96	6.74	95	9.93	31	2.9	17	1.26	1	0.09	0	0	13	1.18	1	0.09	0	0	3	0.25	0	0	73	5.78	15	1.29	33	3.03	0	0	0	0	4	0.33	5
BMK_Unigene_084279	8584	251.62	6881	203.63	8601	249.44	2253	56.83	1662	38.14	3881	105.78	6751	173.99	13709	301.32	4618	149.13	2426	71.08	3226	75.95	978	27.87	1107	30.15	5126	145.37	3108	84.28	7518	219.03	7386	193.04	7299	213.92	5059	124.98	4779	128.52	5088	146.24	3377	94.17	1374	38.1	5394	141.25	8613
BMK_Unigene_082615	694	26.14	762	28.96	749	27.91	631	20.47	416	12.3	382	13.39	26415	876.11	37322	1054.91	7331	304.93	635	23.92	1415	42.75	631	23.11	15502	542.37	249	9.08	510	17.8	1013	37.98	746	25.11	731	27.58	1013	32.19	789	27.3	835	30.86	897	32.13	505	18	519	17.47	996
BMK_Unigene_081150	34	1.5	36	1.6	15	0.66	1521	57.9	2132	74.09	1238	50.92	2	0.08	1	0.03	0	0	1188	52.53	444	15.72	1585	68.1	157	6.44	79	3.38	78	3.2	117	5.15	29	1.15	44	1.95	19	0.71	18	0.73	10	0.43	10	0.42	41	1.72	16	0.63	4
BMK_Unigene_080628	10196	440	8578	373.28	9129	389.51	2276	84.6	1599	54.25	2161	86.78	16653	633.26	16532	535.5	10947	522.35	1976	85.31	8412	290.88	1450	60.84	5775	231.42	11420	477.24	5254	210.28	17072	733.93	13455	519.47	14955	647.03	6708	244.37	4977	197.43	6239	264.22	5099	209.14	3015	123.18	6364	245.36	27108
BMK_Unigene_080434	8238	409.74	5492	275.28	6739	331.29	1291	55.34	1060	41.53	3728	172.59	2820	123.75	7777	290.49	2165	119.27	2020	100.58	2802	111.55	1122	54.29	1354	62.51	6624	319.18	2705	124.92	6171	306.11	5987	266.83	5500	274.61	3049	128.15	3070	140.47	2784	135.98	2469	116.67	1802	84.92	3497	155.4	6248
BMK_Unigene_080299	8429	455.95	4418	240.72	7688	410.95	99	4.62	54	2.3	111	5.59	786	37.53	2297	93.33	997	59.8	125	6.77	490	21.2	97	5.1	4746	238.23	2446	128.21	1494	75.08	4693	253.34	8389	407.04	9569	520.03	100	4.57	164	8.17	126	6.69	73	3.75	9	0.46	40	1.93	746
BMK_Unigene_080126	342	25.28	220	16.36	329	24.05	33	2.1	28	1.7	46	3.17	127	8.34	60	3.37	149	12.29	45	3.34	34	2	27	1.94	33	2.26	139	9.97	71	4.92	158	11.73	110	7.33	124	9.24	6	0.38	29	1.98	25	1.82	3	0.21	2	0.14	26	1.72	81
BMK_Unigene_079932	3	0.09	19	0.45	2	0.05	39	0.8	39	0.72	19	0.42	3254	66.79	5713	100.04	1258	32.34	68	1.59	193	3.63	119	2.72	60	1.31	12	0.28	521	11.27	34	0.8	17	0.37	32	0.75	2641	51.97	2090	44.78	2149	49.23	2725	60.6	2355	52.03	2074	43.3	3629
BMK_Unigene_079620	22	1.37	38	2.39	43	2.65	271	14.6	305	15.04	190	11.06	109	6.04	210	9.89	87	6.1	162	10.12	154	7.7	230	13.95	237	13.76	68	4.13	119	6.95	53	3.35	99	5.55	88	5.59	303	16.04	278	16.03	273	16.79	175	10.4	210	12.42	197	10.99	76
BMK_Unigene_079275	270	14.15	277	14.61	271	14.01	12	0.54	5	0.21	30	1.46	35	1.66	72	2.83	21	1.27	0	0	2	0.08	0	0	11	0.53	62	3.18	20	0.97	45	2.35	107	5.04	83	4.41	25	1.14	36	1.73	25	1.29	0	0	0	0	18	0.84	9
BMK_Unigene_078940	1027	58.12	936	53.34	1101	61.56	6	0.29	5	0.22	9	0.47	249	12.44	282	11.99	540	33.91	1	0.06	8	0.36	0	0	40	2.1	757	41.52	194	10.2	382	21.58	375	19.05	359	20.42	513	24.54	229	11.93	562	31.23	11	0.59	31	1.66	713	36.04	255
BMK_Unigene_078772	14	0.8	19	1.09	18	1.02	39	1.92	37	1.67	38	2.07	51049	2578.06	73439	3154.94	9242	586.53	97	5.6	2283	104.39	436	24.28	7760	411.7	9	0.5	1498	79.64	119	6.85	106	5.48	185	10.66	2018	97.61	2019	106.36	1566	87.96	5024	272.76	1434	77.71	1395	71.25	4307
BMK_Unigene_078646	4610	222.45	2621	127.46	3805	181.51	975	40.56	442	16.82	2464	110.67	1378	58.63	3249	117.7	1142	61.01	1558	75.24	1225	47.35	164	7.7	344	15.45	1799	84.08	1523	68.22	1895	91.17	1627	70.32	2029	98.27	983	40.06	893	39.63	961	45.51	678	31.07	352	16.08	961	41.42	582
BMK_Unigene_078264	1172	63.23	784	42.61	1175	62.64	43	2	7	0.3	30	1.51	83	3.95	145	5.88	186	11.13	7	0.38	21	0.91	1	0.05	50	2.5	466	24.36	233	11.68	664	35.75	440	21.29	472	25.58	581	26.49	274	13.61	513	27.18	87	4.46	58	2.96	343	16.53	73
BMK_Unigene_078180	54	2.83	104	5.44	101	5.18	110029	4905.97	141701	5777.2	65904	3174.32	597	27.26	2453	95.33	105	6.02	83366	4317.01	29422	1218.05	136984	6890.45	4143	198.99	112	5.65	3648	175.34	1285	66.33	107	4.97	270	14.04	53988	2360.49	43410	2066.91	48518	2464.69	68013	3342.13	84071	4120.07	53268	2462	849
BMK_Unigene_078025	3	0.23	7	0.54	9	0.69	101	6.77	56	3.49	47	3.39	112	7.73	105	6.13	27	2.35	45	3.56	37	2.32	37	2.81	18	1.32	8	0.6	8	0.58	7	0.54	0	0	10	0.85	72	4.74	30	2.15	35	2.73	43	3.16	43	3.21	35	2.42	8
BMK_Unigene_077998	6012	287.7	4378	211.15	5129	242.62	1741	71.81	1330	50.11	1423	63.4	1290	54.44	1502	53.97	1564	82.86	1148	54.98	1696	64.99	386	17.98	145	6.44	726	33.65	306	13.59	814	38.83	741	31.76	638	30.64	1060	42.84	1329	58.49	1355	63.65	938	42.64	251	11.37	769	32.87	1037
BMK_Unigene_077873	276	9.9	344	12.45	223	7.91	66	2.04	46	1.29	105	3.5	216	6.82	196	5.28	126	4.99	17	0.61	123	3.54	20	0.7	44	1.47	147	5.1	97	3.22	201	7.18	298	9.55	132	4.74	455	13.77	160	5.27	326	11.47	1277	43.57	800	27.16	478	15.32	212
BMK_Unigene_077541	1168	51.43	1671	74.18	999	43.49	499	18.92	557	19.28	408	16.72	483	18.74	583	19.27	749	36.48	438	19.29	505	17.82	514	22	296	12.1	423	18.04	493	20.13	520	22.81	888	34.99	482	21.28	637	23.68	688	27.85	562	24.29	555	23.22	532	22.18	661	26	467
BMK_Unigene_077311	98	5.66	76	4.45	83	4.74	196	9.75	193	8.8	282	15.19	151	7.73	345	14.98	32	2.06	278	16.12	127	5.88	288	16.2	169	9.06	332	18.57	250	13.46	327	18.87	372	19.32	526	30.53	55	2.7	107	5.73	82	4.7	44	2.46	70	3.84	72	3.73	230
BMK_Unigene_076385	111	4.9	132	5.88	162	7.07	281	10.69	271	9.41	208	8.55	306	11.91	448	14.85	246	12.01	194	8.57	140	4.95	198	8.5	358	14.67	206	8.81	324	13.27	280	12.32	262	10.35	260	11.51	1255	46.78	1227	49.8	963	41.73	726	30.46	1151	48.11	1208	47.64	1306
BMK_Unigene_075948	155	11.05	317	22.72	81	5.7	0	0	0	0	0	0	18	1.14	15	0.8	10	0.79	7	0.5	5	0.28	8	0.55	0	0	1	0.07	3	0.2	4	0.29	13	0.83	6	0.43	0	0	0	0	0	0	9	0.61	4	0.27	2	0.13	2
BMK_Unigene_075924	3194	180.25	2669	151.68	3741	208.6	1586	77.15	1398	62.25	1369	71.93	4200	209.31	6641	281.56	4255	266.44	1236	69.83	6067	273.71	973	53.38	604	31.63	748	40.91	1752	91.9	698	39.33	621	31.45	569	32.28	4212	200.97	5598	290.89	3993	221.29	3312	177.44	2922	156.22	4887	246.34	2386
BMK_Unigene_075326	16	0.53	20	0.67	13	0.45	73	2.08	33	0.86	17	0.54	586	16.85	1084	26.57	557	20.09	166	5.44	184	4.83	63	2.02	1	0.06	11	0.35	268	8.12	26	0.86	97	2.84	2	0.07	951	26.21	368	11.05	629	20.17	456	14.2	572	17.71	631	18.45	164
BMK_Unigene_075153	195	9.36	206	9.94	205	9.7	49	2.03	55	2.07	60	2.67	1762	74.37	1548	55.64	1787	94.68	60	2.9	49	1.88	87	4.05	32	1.42	292	13.58	87	3.86	245	11.74	281	12.09	309	14.84	309	12.49	162	7.13	267	12.57	72	3.27	55	2.49	283	12.1	789
BMK_Unigene_075026	1474	92.31	1522	95.94	1613	99.78	1012	54.65	613	30.35	459	26.77	3123	172.9	3964	186.59	460	32.02	705	44.22	211	10.55	168	10.23	271	15.74	420	25.5	305	17.77	312	19.53	275	15.48	192	12.1	2377	125.95	1322	76.3	1855	114.13	1184	70.36	1212	71.94	1023	57.23	1876
BMK_Unigene_074960	680	63	582	54.12	867	79.22	174	13.93	185	13.67	968	83.65	156	12.84	329	22.96	119	12.35	490	45.54	141	10.38	52	4.68	103	8.84	1375	123.73	472	40.9	822	76.48	514	43.12	709	66.49	208	16.36	57	4.89	159	14.49	7	0.61	8	0.7	16	1.32	25
BMK_Unigene_073434	136	7.99	174	10.3	107	6.21	837	42.41	731	33.92	342	18.72	125	6.49	221	9.76	98	6.4	298	17.54	816	38.33	597	34.11	421	22.96	103	5.87	188	10.27	143	8.39	436	23.01	140	8.27	657	32.66	175	9.47	362	20.9	1629	90.88	987	54.97	615	32.29	15
BMK_Unigene_073184	7180	515.27	5334	384.94	7041	498.88	1389	86.01	1169	66.49	3680	246.09	4696	298.35	9391	506.85	3043	243.31	3047	219.09	1882	107.68	1088	75.91	511	34	4556	317.17	2822	188.73	3544	254.55	3232	208.94	3376	244.24	3678	223.56	2728	180.64	3436	242.36	4469	304.12	1816	123.57	3896	249.72	3548
BMK_Unigene_072425	34	2.4	83	5.9	36	2.51	71	4.33	192	10.75	30	1.97	0	0	0	0	0	0	8	0.57	1	0.06	8	0.55	0	0	45	3.08	9	0.59	32	2.26	21	1.34	24	1.71	0	0	0	0	0	0	0	0	1	0.07	0	0	0
BMK_Unigene_072271	60	3.18	91	4.86	47	2.46	84	3.84	76	3.18	75	3.7	3195	149.59	19558	779.23	504	29.69	160	8.53	215	9.12	82	4.23	68	3.35	30	1.54	313	15.43	33	1.75	38	1.81	26	1.39	479	21.5	368	17.97	246	12.83	110	5.56	79	4.01	593	28.12	861
BMK_Unigene_072030	386	22.88	220	13.13	338	19.8	33	1.69	31	1.45	60	3.31	33	1.73	66	2.94	44	2.9	67	3.98	90	4.26	4	0.23	3	0.17	68	3.91	13	0.72	36	2.13	11	0.59	21	1.25	37	1.86	24	1.31	31	1.81	8	0.45	10	0.56	47	2.49	10
BMK_Unigene_071998	751	50.21	678	45.61	862	56.91	164	9.46	51	2.7	120	7.47	208	12.3	640	32.17	309	22.99	246	16.47	115	6.14	51	3.32	66	4.09	140	9.08	125	7.78	147	9.83	207	12.45	162	10.91	135	7.64	100	6.16	137	9	8	0.51	26	1.65	31	1.85	53
BMK_Unigene_071853	15	1.28	21	1.8	27	2.27	50	3.68	27	1.83	53	4.21	6	0.45	3	0.19	52	4.96	48	4.1	29	1.97	24	1.99	37	2.92	19	1.57	33	2.63	69	5.9	11	0.85	57	4.91	9	0.65	24	1.89	18	1.51	1	0.08	32	2.59	45	3.43	4
BMK_Unigene_071404	261	28.3	252	27.38	290	30.99	156	14.63	189	16.41	153	15.49	76	7.34	386	31.55	288	35.13	127	13.82	801	68.8	39	4.11	23	2.31	326	34.36	266	27.04	161	17.58	269	26.51	105	11.56	299	27.57	196	19.7	174	18.58	22	2.26	27	2.78	230	22.27	85
BMK_Unigene_071337	61	3.46	81	4.63	63	3.53	21	1.03	56	2.51	23	1.21	61	3.05	169	7.2	18	1.13	15	0.85	22	1	13	0.72	1	0.05	78	4.29	26	1.37	99	5.6	122	6.21	42	2.39	252	12.08	266	13.89	208	11.58	253	13.62	207	11.12	313	15.85	38
BMK_Unigene_070744	91	7.52	110	9.18	88	7.21	100	7.19	58	3.84	131	10.11	923	67.56	3004	186.54	825	76.11	134	11.11	381	25.03	110	8.89	870	66.53	215	17.27	827	63.77	383	31.74	872	65.05	394	32.91	3463	242.31	3130	238.65	2326	188.79	3477	271.81	2856	223.6	2834	208.83	2513
BMK_Unigene_068653	11	0.77	125	8.8	2	0.14	1	0.06	0	0	0	0	3739	231.62	3250	171.06	1618	126.11	0	0	21	1.17	0	0	10	0.65	40	2.72	154	10.04	820	57.42	365	23	198	13.97	1139	67.51	205	13.24	1125	77.38	8482	563.02	1388	92.11	1783	111.46	941
BMK_Unigene_068405	1	0.08	18	1.36	17	1.27	1	0.07	0	0	1	0.07	72	4.86	6	0.34	57	4.83	2	0.15	0	0	32	2.42	0	0	0	0	9	0.63	2	0.15	7	0.48	0	0	162	10.37	68	4.75	100	7.48	393	28.13	310	22.16	146	9.87	37
BMK_Unigene_067261	47	11.73	39	9.63	57	13.93	4	0.87	8	1.67	3	0.7	44	10.01	37	7.03	77	22.47	0	0	7	1.35	1	0.24	8	1.84	11	2.69	5	1.2	26	6.69	11	2.58	13	3.39	0	0	2	0.47	2	0.5	0	0	1	0.24	3	0.67	43
BMK_Unigene_066578	729	48.11	1013	67.27	562	36.63	95	5.41	98	5.12	99	6.09	10441	609.49	10655	528.66	8593	630.9	68	4.5	70	3.69	2	0.13	305	18.67	537	34.37	392	24.09	1175	77.54	811	48.15	741	49.25	1716	95.86	1390	84.58	1585	102.78	797	49.9	402	25.15	2648	156.1	16699
BMK_Unigene_066004	2	0.18	0	0	2	0.17	454	34.73	311	21.93	1018	84.07	0	0	61	4.07	0	0	0	0	4	0.28	2	0.17	0	0	2	0.17	20	1.66	25	2.22	0	0	0	0	105	7.89	72	5.9	43	3.75	5	0.42	3	0.25	26	2.06	5
BMK_Unigene_064801	23	1.44	18	1.13	5	0.31	0	0	4	0.2	6	0.35	3953	218.35	5827	273.66	2018	140.2	17	1.06	8397	419.05	137	8.32	56	3.25	17	1.03	46	2.67	127	7.93	784	44.03	76	4.78	73	3.86	14	0.81	59	3.62	328	19.45	72	4.26	59	3.29	15
[truncated: 217 more columns]
