# Supplementary material
Source: MDPI journal article supplement (https://www.mdpi.com/1999-4907/15/4/618)
Supplement: s1 [file s1 › Supplementary Table S8.xlsx]

## Sheet: Sheet1
Supplementary Table S8:The DEGs in the pathway of Flavonoid Biosynthesis
#ID	GGr-1_count	GGr-1_FPKM	GGr-2_count	GGr-2_FPKM	GGr-3_count	GGr-3_FPKM	GGs-1_count	GGs-1_FPKM	GGs-2_count	GGs-2_FPKM	GGs-3_count	GGs-3_FPKM	GSr-1_count	GSr-1_FPKM	GSr-2_count	GSr-2_FPKM	GSr-3_count	GSr-3_FPKM	GSs-1_count	GSs-1_FPKM	GSs-2_count	GSs-2_FPKM	GSs-3_count	GSs-3_FPKM	SGr-1_count	SGr-1_FPKM	SGr-2_count	SGr-2_FPKM	SGr-3_count	SGr-3_FPKM	SGr2-1_count	SGr2-1_FPKM	SGr2-2_count	SGr2-2_FPKM	SGr2-3_count	SGr2-3_FPKM	SGs-1_count	SGs-1_FPKM	SGs-2_count	SGs-2_FPKM	SGs-3_count	SGs-3_FPKM	SGs2-1_count	SGs2-1_FPKM	SGs2-2_count	SGs2-2_FPKM	SGs2-3_count	SGs2-3_FPKM	SSr-1_count
BMK_Unigene_148427	404	19.59	179	8.78	329	15.78	223	9.31	166	6.35	223	10.08	0	0.03	9	0.36	9	0.48	368	17.84	621	24.07	317	14.93	22	1.01	84	3.97	53	2.39	15	0.76	21	0.93	8	0.42	100	4.1	100	4.45	124	5.92	2	0.12	0	0	25	1.09	7
BMK_Unigene_139457	77	4.23	82	4.54	82	4.46	22	1.04	32	1.39	32	1.64	17	0.83	50	2.07	14	0.85	77	4.24	99	4.35	135	7.22	95	4.85	199	10.61	103	5.26	243	13.34	133	6.56	161	8.9	13	0.6	6	0.3	0	0	3	0.16	27	1.41	15	0.74	14
BMK_Unigene_142933	362	27.02	287	21.53	370	27.26	88	5.67	51	3.02	247	17.18	38	2.51	46	2.58	15	1.25	118	8.83	184	10.94	61	4.43	85	5.88	225	16.29	131	9.12	235	17.56	342	23.01	205	15.43	27	1.71	17	1.17	33	2.42	41	2.9	29	2.05	39	2.6	35
BMK_Unigene_077783	504	31.46	272	17.08	545	33.6	318	17.16	155	7.67	209	12.17	63	3.49	107	5.03	37	2.63	258	16.17	520	25.91	201	12.24	25	1.48	64	3.89	28	1.68	20	1.27	34	1.94	24	1.53	343	18.14	413	23.8	612	37.54	5	0.33	13	0.77	173	9.68	52
BMK_Unigene_077183	13155	956.59	9041	661.07	14836	1065.1	3925	246.28	3079	177.49	3167	214.61	2270	146.16	2855	156.15	3586	290.6	3082	224.56	4700	272.45	1648	116.51	673	45.37	3460	244.08	1547	104.85	2054	149.51	3027	198.34	2279	167.1	2214	136.38	3325	223.12	2807	200.63	87	6	127	8.76	1361	88.39	1398
BMK_Unigene_145738	28693	2161.07	21209	1605.84	31730	2359.09	6244	405.87	4086	244.15	3801	266.81	4915	327.92	5509	312.13	7892	662.88	3373	254.59	7071	424.35	1197	87.65	173	12.08	3239	236.7	1385	97.27	1549	116.83	1775	120.54	1671	126.96	5944	379.34	7369	512.35	7614	563.75	922	65.83	779	55.64	3574	240.42	3341
BMK_Unigene_146125	9302	549.48	5580	331.86	9313	543.49	2781	141.63	1826	85.17	1986	109.25	1160	60.54	1203	53.4	1653	108.42	2102	124.32	2246	106.01	825	47.38	163	8.93	1027	58.8	473	25.98	592	34.93	671	35.6	651	38.67	1682	84.03	1973	107.35	2039	118.3	296	16.6	246	13.77	1193	62.95	973
BMK_Unigene_078264	1172	63.23	784	42.61	1175	62.64	43	2	7	0.3	30	1.51	83	3.95	145	5.88	186	11.13	7	0.38	21	0.91	1	0.05	50	2.5	466	24.36	233	11.68	664	35.75	440	21.29	472	25.58	581	26.49	274	13.61	513	27.18	87	4.46	58	2.96	343	16.53	73
BMK_Unigene_078940	1027	58.12	936	53.34	1101	61.56	6	0.29	5	0.22	9	0.47	249	12.44	282	11.99	540	33.91	1	0.06	8	0.36	0	0	40	2.1	757	41.52	194	10.2	382	21.58	375	19.05	359	20.42	513	24.54	229	11.93	562	31.23	11	0.59	31	1.66	713	36.04	255
BMK_Unigene_156542	1402	38.49	1027	28.47	1285	34.9	282	6.66	150	3.22	606	15.47	738	17.81	1217	25.05	521	15.75	416	11.41	419	9.24	107	2.86	306	7.81	988	26.24	722	18.33	1282	34.97	1328	32.49	1094	30.02	523	12.1	560	14.1	611	16.45	1293	33.77	531	13.79	882	21.63	1261
BMK_Unigene_139238	8315	1038.58	5352	669.01	8701	1070.14	1166	126.17	685	68.96	780	91.09	474	52.89	455	42.98	1083	152.92	880	110.52	871	85.98	183	22.24	21	2.51	532	64.77	213	25.08	192	24.23	239	27.35	331	42.13	540	57.49	899	104.42	886	109.1	42	4.99	51	6.16	301	33.65	327
BMK_Unigene_072247	4	0.35	10	0.87	14	1.2	91	6.81	91	6.28	71	5.74	3	0.23	4	0.26	0	0	29	2.52	12	0.83	31	2.61	0	0	0	0	7	0.57	4	0.35	0	0	1	0.09	108	7.94	72	5.77	68	5.8	92	7.55	92	7.57	165	12.77	3
BMK_Unigene_150794	7411	327.38	4649	207.05	6523	284.88	1028	39.11	682	23.69	2684	110.33	2500	97.33	5037	167.02	1900	92.83	2076	91.74	1140	40.34	722	31	1095	44.91	4486	191.91	2698	110.54	5272	232.04	5359	211.84	5130	227.24	1899	70.82	1774	72.04	1781	77.21	2034	85.38	962	40.23	1721	67.91	3268
BMK_Unigene_147664	35	2.49	52	3.72	40	2.81	33	2.03	42	2.37	36	2.39	122	7.68	141	7.54	73	5.79	142	10.12	1847	104.78	201	13.9	47	3.1	40	2.76	100	6.63	42	2.99	65	4.17	16	1.15	35	2.11	54	3.54	20	1.4	35	2.36	27	1.82	27	1.72	107
BMK_Unigene_145622	1403	81.13	1539	89.61	1303	74.44	93	4.64	127	5.8	84	4.52	4263	217.74	3248	141.11	2161	138.7	20	1.16	37	1.71	8	0.45	124	6.65	1337	74.93	505	27.15	1290	74.49	1663	86.33	1108	64.41	773	37.8	296	15.76	692	39.3	1418	77.83	471	25.8	672	34.71	2883
BMK_Unigene_153447	121	4.25	80	2.83	112	3.89	9	0.27	7	0.19	4	0.13	169	5.22	251	6.61	224	8.67	23	0.81	38	1.07	125	4.26	2	0.07	107	3.63	111	3.61	71	2.48	85	2.66	90	3.16	89	2.63	65	2.09	64	2.2	45	1.5	98	3.25	48	1.5	263
BMK_Unigene_072425	34	2.4	83	5.9	36	2.51	71	4.33	192	10.75	30	1.97	0	0	0	0	0	0	8	0.57	1	0.06	8	0.55	0	0	45	3.08	9	0.59	32	2.26	21	1.34	24	1.71	0	0	0	0	0	0	0	0	1	0.07	0	0	0
BMK_Unigene_080226	326	15.28	323	15.23	319	14.78	1239	49.89	820	30.15	620	26.97	4237	174.64	7905	277.39	1535	79.43	1724	80.63	5804	217.23	2537	115.27	1916	83.13	943	42.72	4726	204.98	806	37.56	1873	78.42	763	35.78	2490	98.3	1726	74.2	2138	98.1	4914	218.24	3144	139.14	3402	142.06	2843
BMK_Unigene_144128	5442	470.72	4006	347.98	5158	440.18	1018	76.05	643	44.27	2337	188.51	3884	298.14	10430	679.21	3638	351.98	1908	165.5	1395	95.96	553	46.51	477	38.23	2507	210.55	2205	178.19	3008	261.04	3266	255.4	3601	314.91	3037	222.88	3719	297.41	2741	233.22	3375	276.51	1592	130.68	3800	293.55	3542
BMK_Unigene_151660	6994	288.19	5304	220.41	8015	326.57	2086	74.02	1241	40.17	1318	50.53	822	29.84	1356	41.93	1358	61.84	1102	45.42	4318	142.62	453	18.15	393	15.04	1567	62.52	813	31.06	871	35.74	1071	39.46	907	37.45	983	34.18	1648	62.4	1444	58.38	139	5.44	149	5.81	574	21.13	513
BMK_Unigene_080628	10196	440	8578	373.28	9129	389.51	2276	84.6	1599	54.25	2161	86.78	16653	633.26	16532	535.5	10947	522.35	1976	85.31	8412	290.88	1450	60.84	5775	231.42	11420	477.24	5254	210.28	17072	733.93	13455	519.47	14955	647.03	6708	244.37	4977	197.43	6239	264.22	5099	209.14	3015	123.18	6364	245.36	27108
BMK_Unigene_151424	3730	147.88	2913	116.46	3619	141.88	773	26.41	509	15.86	768	28.34	1565	54.66	1853	55.11	664	29.11	717	28.46	2624	83.41	561	21.64	1878	69.13	3705	142.18	1451	53.32	6108	241.03	4326	153.28	5330	211.66	461	15.45	246	8.97	454	17.68	601	22.65	188	7.08	593	21	686
BMK_Unigene_066578	729	48.11	1013	67.27	562	36.63	95	5.41	98	5.12	99	6.09	10441	609.49	10655	528.66	8593	630.9	68	4.5	70	3.69	2	0.13	305	18.67	537	34.37	392	24.09	1175	77.54	811	48.15	741	49.25	1716	95.86	1390	84.58	1585	102.78	797	49.9	402	25.15	2648	156.1	16699
BMK_Unigene_073908	0	0	0	0	0	0	204	16.54	258	19.3	26	2.28	0	0	5	0.35	0	0	10	0.94	4	0.3	1	0.09	0	0	0	0	0	0	1	0.09	0	0	0	0	1	0.08	8	0.69	15	1.38	6	0.53	2	0.18	5	0.42	0
BMK_Unigene_141755	0	0	2	0.16	1	0.08	53	3.6	68	4.25	181	13.28	4	0.28	5	0.3	1	0.09	49	3.87	31	1.94	1	0.08	3	0.22	0	0	1	0.07	32	2.52	0	0	3	0.24	1069	71.32	1395	101.41	1975	152.84	118	8.8	131	9.78	78	5.48	1
BMK_Unigene_144235	84	5.5	64	4.22	101	6.53	64	3.61	32	1.66	23	1.4	29	1.68	34	1.67	34	2.48	93	6.1	1527	79.8	83	5.28	11	0.67	41	2.6	32	1.95	49	3.21	93	5.48	45	2.97	50	2.77	48	2.9	64	4.12	96	5.96	46	2.85	46	2.69	35
[truncated: 217 more columns]
