# Supplementary material
Source: MDPI journal article supplement (https://www.mdpi.com/1999-4907/15/4/618)
Supplement: s1 [file s1 › Supplementary Table S9.xlsx]

## Sheet: Sheet1
Supplementary Table S9:The DEGs in the pathway of ubiquinone and other terpenoid-quinone biosynthesis, cyanoamino acid metabolism, stilbenoid, diarylheptanoid and gingerol biosynthesis, cution, suberine and wax biosynthesis
The DEGs in the pathway of ubiquinone and other terpenoid-quinone biosynthesis
#ID	GGr-1_count	GGr-1_FPKM	GGr-2_count	GGr-2_FPKM	GGr-3_count	GGr-3_FPKM	GGs-1_count	GGs-1_FPKM	GGs-2_count	GGs-2_FPKM	GGs-3_count	GGs-3_FPKM	GSr-1_count	GSr-1_FPKM	GSr-2_count	GSr-2_FPKM	GSr-3_count	GSr-3_FPKM	GSs-1_count	GSs-1_FPKM	GSs-2_count	GSs-2_FPKM	GSs-3_count	GSs-3_FPKM	SGr-1_count	SGr-1_FPKM	SGr-2_count	SGr-2_FPKM	SGr-3_count	SGr-3_FPKM	SGr2-1_count	SGr2-1_FPKM	SGr2-2_count	SGr2-2_FPKM	SGr2-3_count	SGr2-3_FPKM	SGs-1_count	SGs-1_FPKM	SGs-2_count	SGs-2_FPKM	SGs-3_count	SGs-3_FPKM	SGs2-1_count	SGs2-1_FPKM	SGs2-2_count	SGs2-2_FPKM	SGs2-3_count	SGs2-3_FPKM	SSr-1_count
BMK_Unigene_152464	1138	47.18	621	25.96	995	40.79	172	6.15	134	4.38	413	15.95	154	5.63	397	12.37	64	2.97	309	12.84	450	14.97	220	8.89	183	7.06	902	36.19	250	9.64	917	37.88	807	29.92	780	32.42	183	6.43	92	3.52	180	7.35	170	6.7	101	3.97	207	7.66	364
BMK_Unigene_080434	8238	409.74	5492	275.28	6739	331.29	1291	55.34	1060	41.53	3728	172.59	2820	123.75	7777	290.49	2165	119.27	2020	100.58	2802	111.55	1122	54.29	1354	62.51	6624	319.18	2705	124.92	6171	306.11	5987	266.83	5500	274.61	3049	128.15	3070	140.47	2784	135.98	2469	116.67	1802	84.92	3497	155.4	6248
BMK_Unigene_077998	6012	287.7	4378	211.15	5129	242.62	1741	71.81	1330	50.11	1423	63.4	1290	54.44	1502	53.97	1564	82.86	1148	54.98	1696	64.99	386	17.98	145	6.44	726	33.65	306	13.59	814	38.83	741	31.76	638	30.64	1060	42.84	1329	58.49	1355	63.65	938	42.64	251	11.37	769	32.87	1037
BMK_Unigene_079932	3	0.09	19	0.45	2	0.05	39	0.8	39	0.72	19	0.42	3254	66.79	5713	100.04	1258	32.34	68	1.59	193	3.63	119	2.72	60	1.31	12	0.28	521	11.27	34	0.8	17	0.37	32	0.75	2641	51.97	2090	44.78	2149	49.23	2725	60.6	2355	52.03	2074	43.3	3629
BMK_Unigene_078646	4610	222.45	2621	127.46	3805	181.51	975	40.56	442	16.82	2464	110.67	1378	58.63	3249	117.7	1142	61.01	1558	75.24	1225	47.35	164	7.7	344	15.45	1799	84.08	1523	68.22	1895	91.17	1627	70.32	2029	98.27	983	40.06	893	39.63	961	45.51	678	31.07	352	16.08	961	41.42	582
BMK_Unigene_080628	10196	440	8578	373.28	9129	389.51	2276	84.6	1599	54.25	2161	86.78	16653	633.26	16532	535.5	10947	522.35	1976	85.31	8412	290.88	1450	60.84	5775	231.42	11420	477.24	5254	210.28	17072	733.93	13455	519.47	14955	647.03	6708	244.37	4977	197.43	6239	264.22	5099	209.14	3015	123.18	6364	245.36	27108
BMK_Unigene_151424	3730	147.88	2913	116.46	3619	141.88	773	26.41	509	15.86	768	28.34	1565	54.66	1853	55.11	664	29.11	717	28.46	2624	83.41	561	21.64	1878	69.13	3705	142.18	1451	53.32	6108	241.03	4326	153.28	5330	211.66	461	15.45	246	8.97	454	17.68	601	22.65	188	7.08	593	21	686
The DEGs in the pathway of cyanoamino acid metabolism
#ID	GGr-1_count	GGr-1_FPKM	GGr-2_count	GGr-2_FPKM	GGr-3_count	GGr-3_FPKM	GGs-1_count	GGs-1_FPKM	GGs-2_count	GGs-2_FPKM	GGs-3_count	GGs-3_FPKM	GSr-1_count	GSr-1_FPKM	GSr-2_count	GSr-2_FPKM	GSr-3_count	GSr-3_FPKM	GSs-1_count	GSs-1_FPKM	GSs-2_count	GSs-2_FPKM	GSs-3_count	GSs-3_FPKM	SGr-1_count	SGr-1_FPKM	SGr-2_count	SGr-2_FPKM	SGr-3_count	SGr-3_FPKM	SGr2-1_count	SGr2-1_FPKM	SGr2-2_count	SGr2-2_FPKM	SGr2-3_count	SGr2-3_FPKM	SGs-1_count	SGs-1_FPKM	SGs-2_count	SGs-2_FPKM	SGs-3_count	SGs-3_FPKM	SGs2-1_count	SGs2-1_FPKM	SGs2-2_count	SGs2-2_FPKM	SGs2-3_count	SGs2-3_FPKM	SSr-1_count
BMK_Unigene_077731	136	8.52	132	8.32	211	13.07	1004	54.23	946	46.87	3691	215.33	133	7.36	501	23.61	69	4.8	5878	368.7	1176	58.85	1386	84.42	56	3.25	145	8.8	148	8.63	114	7.13	67	3.77	126	8	138	7.31	933	53.88	430	26.49	44	2.61	46	2.76	55	3.08	237
BMK_Unigene_150550	57	2.9	26	1.36	43	2.19	0	0	1	0.04	2	0.09	163	7.26	240	9.09	122	6.82	0	0	1	0.04	0	0	1	0.05	10	0.5	15	0.75	7	0.4	39	1.78	24	1.22	111	4.74	64	2.97	88	4.4	0	0	1	0.05	53	2.39	6
BMK_Unigene_154370	4	0.3	28	2.12	3	0.22	29	1.88	36	2.15	67	4.69	6655	443.22	10735	607.15	1110	93.06	60	4.52	365	21.87	70	5.12	748	52.2	2	0.15	214	15	69	5.19	50	3.39	52	3.94	279	17.77	413	28.66	250	18.48	1012	72.2	229	16.33	316	21.22	594
BMK_Unigene_078772	14	0.8	19	1.09	18	1.02	39	1.92	37	1.67	38	2.07	51049	2578.06	73439	3154.94	9242	586.53	97	5.6	2283	104.39	436	24.28	7760	411.7	9	0.5	1498	79.64	119	6.85	106	5.48	185	10.66	2018	97.61	2019	106.36	1566	87.96	5024	272.76	1434	77.71	1395	71.25	4307
BMK_Unigene_068587	4027	369.32	2850	262.36	4946	447.42	20858	1652.69	22591	1651.56	13942	1192.69	20562	1674.95	19306	1333.49	10835	1113.05	4656	428.33	1800	131.17	5915	527.47	8749	743.26	357	31.8	182	15.61	125	11.51	624	51.8	135	12.53	2211	172.15	2791	236.82	3158	284.98	988	85.79	589	51.28	556	45.54	126
BMK_Unigene_144118	1193	76.94	1281	83.08	769	49	28	1.61	15	0.77	31	1.89	465	26.5	506	24.54	734	52.6	213	13.77	41	2.12	46	2.92	0	0	133	8.31	20	1.25	35	2.25	69	4	16	1.04	325	17.72	453	26.94	554	35.11	19	1.16	62	3.82	71	4.09	239
BMK_Unigene_156047	124	3.29	238	6.38	137	3.6	102	2.33	72	1.5	127	3.14	1094	25.54	3442	68.55	320	9.36	140	3.72	14470	308.89	888	22.93	789	19.48	282	7.25	2406	59.1	423	11.16	816	19.31	301	7.99	238	5.33	208	5.07	187	4.87	493	12.46	95	2.39	219	5.2	72
BMK_Unigene_149439	3	0.13	10	0.44	2	0.09	1012	37.93	1099	37.6	675	27.33	39	1.5	82	2.68	8	0.38	1403	61.08	779	27.16	1658	70.14	24	0.97	12	0.51	50	2.02	42	1.82	17	0.66	40	1.75	611	22.45	561	22.44	586	25.03	925	38.25	571	23.52	370	14.38	25
BMK_Unigene_070232	3	0.19	30	1.92	20	1.26	49	2.69	66	3.32	61	3.62	5	0.28	33	1.58	16	1.13	88	5.61	221	11.24	206	12.76	35	2.07	19	1.17	201	11.91	11	0.7	8	0.46	44	2.82	593	31.96	687	40.33	487	30.48	342	20.67	278	16.78	191	10.87	65
BMK_Unigene_139683	73	6.33	162	14.1	50	4.28	4	0.3	6	0.41	4	0.32	236	18.15	275	17.95	76	7.42	20	1.74	274	18.89	34	2.87	405	32.53	92	7.74	1113	90.14	219	19.05	897	70.3	243	21.3	161	11.84	29	2.32	150	12.79	866	71.1	190	15.63	128	9.94	69
The DEGs in the pathway of stilbenoid, diarylheptanoid and gingerol biosynthesis
#ID	GGr-1_count	GGr-1_FPKM	GGr-2_count	GGr-2_FPKM	GGr-3_count	GGr-3_FPKM	GGs-1_count	GGs-1_FPKM	GGs-2_count	GGs-2_FPKM	GGs-3_count	GGs-3_FPKM	GSr-1_count	GSr-1_FPKM	GSr-2_count	GSr-2_FPKM	GSr-3_count	GSr-3_FPKM	GSs-1_count	GSs-1_FPKM	GSs-2_count	GSs-2_FPKM	GSs-3_count	GSs-3_FPKM	SGr-1_count	SGr-1_FPKM	SGr-2_count	SGr-2_FPKM	SGr-3_count	SGr-3_FPKM	SGr2-1_count	SGr2-1_FPKM	SGr2-2_count	SGr2-2_FPKM	SGr2-3_count	SGr2-3_FPKM	SGs-1_count	SGs-1_FPKM	SGs-2_count	SGs-2_FPKM	SGs-3_count	SGs-3_FPKM	SGs2-1_count	SGs2-1_FPKM	SGs2-2_count	SGs2-2_FPKM	SGs2-3_count	SGs2-3_FPKM	SSr-1_count
BMK_Unigene_142933	362	27.02	287	21.53	370	27.26	88	5.67	51	3.02	247	17.18	38	2.51	46	2.58	15	1.25	118	8.83	184	10.94	61	4.43	85	5.88	225	16.29	131	9.12	235	17.56	342	23.01	205	15.43	27	1.71	17	1.17	33	2.42	41	2.9	29	2.05	39	2.6	35
BMK_Unigene_078264	1172	63.23	784	42.61	1175	62.64	43	2	7	0.3	30	1.51	83	3.95	145	5.88	186	11.13	7	0.38	21	0.91	1	0.05	50	2.5	466	24.36	233	11.68	664	35.75	440	21.29	472	25.58	581	26.49	274	13.61	513	27.18	87	4.46	58	2.96	343	16.53	73
BMK_Unigene_078940	1027	58.12	936	53.34	1101	61.56	6	0.29	5	0.22	9	0.47	249	12.44	282	11.99	540	33.91	1	0.06	8	0.36	0	0	40	2.1	757	41.52	194	10.2	382	21.58	375	19.05	359	20.42	513	24.54	229	11.93	562	31.23	11	0.59	31	1.66	713	36.04	255
BMK_Unigene_156542	1402	38.49	1027	28.47	1285	34.9	282	6.66	150	3.22	606	15.47	738	17.81	1217	25.05	521	15.75	416	11.41	419	9.24	107	2.86	306	7.81	988	26.24	722	18.33	1282	34.97	1328	32.49	1094	30.02	523	12.1	560	14.1	611	16.45	1293	33.77	531	13.79	882	21.63	1261
BMK_Unigene_150794	7411	327.38	4649	207.05	6523	284.88	1028	39.11	682	23.69	2684	110.33	2500	97.33	5037	167.02	1900	92.83	2076	91.74	1140	40.34	722	31	1095	44.91	4486	191.91	2698	110.54	5272	232.04	5359	211.84	5130	227.24	1899	70.82	1774	72.04	1781	77.21	2034	85.38	962	40.23	1721	67.91	3268
BMK_Unigene_145622	1403	81.13	1539	89.61	1303	74.44	93	4.64	127	5.8	84	4.52	4263	217.74	3248	141.11	2161	138.7	20	1.16	37	1.71	8	0.45	124	6.65	1337	74.93	505	27.15	1290	74.49	1663	86.33	1108	64.41	773	37.8	296	15.76	692	39.3	1418	77.83	471	25.8	672	34.71	2883
BMK_Unigene_153447	121	4.25	80	2.83	112	3.89	9	0.27	7	0.19	4	0.13	169	5.22	251	6.61	224	8.67	23	0.81	38	1.07	125	4.26	2	0.07	107	3.63	111	3.61	71	2.48	85	2.66	90	3.16	89	2.63	65	2.09	64	2.2	45	1.5	98	3.25	48	1.5	263
BMK_Unigene_072425	34	2.4	83	5.9	36	2.51	71	4.33	192	10.75	30	1.97	0	0	0	0	0	0	8	0.57	1	0.06	8	0.55	0	0	45	3.08	9	0.59	32	2.26	21	1.34	24	1.71	0	0	0	0	0	0	0	0	1	0.07	0	0	0
BMK_Unigene_144128	5442	470.72	4006	347.98	5158	440.18	1018	76.05	643	44.27	2337	188.51	3884	298.14	10430	679.21	3638	351.98	1908	165.5	1395	95.96	553	46.51	477	38.23	2507	210.55	2205	178.19	3008	261.04	3266	255.4	3601	314.91	3037	222.88	3719	297.41	2741	233.22	3375	276.51	1592	130.68	3800	293.55	3542
BMK_Unigene_080628	10196	440	8578	373.28	9129	389.51	2276	84.6	1599	54.25	2161	86.78	16653	633.26	16532	535.5	10947	522.35	1976	85.31	8412	290.88	1450	60.84	5775	231.42	11420	477.24	5254	210.28	17072	733.93	13455	519.47	14955	647.03	6708	244.37	4977	197.43	6239	264.22	5099	209.14	3015	123.18	6364	245.36	27108
BMK_Unigene_151424	3730	147.88	2913	116.46	3619	141.88	773	26.41	509	15.86	768	28.34	1565	54.66	1853	55.11	664	29.11	717	28.46	2624	83.41	561	21.64	1878	69.13	3705	142.18	1451	53.32	6108	241.03	4326	153.28	5330	211.66	461	15.45	246	8.97	454	17.68	601	22.65	188	7.08	593	21	686
BMK_Unigene_066578	729	48.11	1013	67.27	562	36.63	95	5.41	98	5.12	99	6.09	10441	609.49	10655	528.66	8593	630.9	68	4.5	70	3.69	2	0.13	305	18.67	537	34.37	392	24.09	1175	77.54	811	48.15	741	49.25	1716	95.86	1390	84.58	1585	102.78	797	49.9	402	25.15	2648	156.1	16699
BMK_Unigene_141755	0	0	2	0.16	1	0.08	53	3.6	68	4.25	181	13.28	4	0.28	5	0.3	1	0.09	49	3.87	31	1.94	1	0.08	3	0.22	0	0	1	0.07	32	2.52	0	0	3	0.24	1069	71.32	1395	101.41	1975	152.84	118	8.8	131	9.78	78	5.48	1
BMK_Unigene_074919	134	7.98	157	9.42	175	10.3	861	44.23	484	22.78	1988	110.31	26	1.37	65	2.91	10	0.66	1004	59.9	298	14.19	79	4.58	355	19.62	123	7.1	266	14.74	167	9.94	70	3.75	208	12.46	63	3.17	333	18.28	309	18.08	14	0.79	36	2.03	52	2.77	0
The DEGs in the pathway of cution, suberine and wax biosynthesis
#ID	GGr-1_count	GGr-1_FPKM	GGr-2_count	GGr-2_FPKM	GGr-3_count	GGr-3_FPKM	GGs-1_count	GGs-1_FPKM	GGs-2_count	GGs-2_FPKM	GGs-3_count	GGs-3_FPKM	GSr-1_count	GSr-1_FPKM	GSr-2_count	GSr-2_FPKM	GSr-3_count	GSr-3_FPKM	GSs-1_count	GSs-1_FPKM	GSs-2_count	GSs-2_FPKM	GSs-3_count	GSs-3_FPKM	SGr-1_count	SGr-1_FPKM	SGr-2_count	SGr-2_FPKM	SGr-3_count	SGr-3_FPKM	SGr2-1_count	SGr2-1_FPKM	SGr2-2_count	SGr2-2_FPKM	SGr2-3_count	SGr2-3_FPKM	SGs-1_count	SGs-1_FPKM	SGs-2_count	SGs-2_FPKM	SGs-3_count	SGs-3_FPKM	SGs2-1_count	SGs2-1_FPKM	SGs2-2_count	SGs2-2_FPKM	SGs2-3_count	SGs2-3_FPKM	SSr-1_count
BMK_Unigene_134771	169	8.26	172	8.47	201	9.71	14	0.59	0	0	0	0	497	21.43	1371	50.32	602	32.59	0	0	28	1.1	0	0	0	0	13	0.62	17	0.77	6	0.29	22	0.96	20	0.98	1074	44.34	360	16.19	820	39.34	37	1.72	32	1.48	1205	52.61	166
BMK_Unigene_073417	953	105.83	1219	135.64	866	94.77	119	11.43	126	11.22	217	22.5	471	46.6	716	59.96	599	74.9	150	16.73	449	39.49	52	5.62	222	22.82	717	77.43	310	32.3	545	60.97	792	79.99	575	64.87	319	30.14	279	28.74	269	29.42	58	6.09	20	2.11	147	14.58	622
BMK_Unigene_064761	17	30.21	55	89.99	4	6.76	2	2.94	2	3.75	11	18.91	506	916.65	4198	5774.64	205	517.14	36	62.67	576	653.41	131	227.15	4603	7143.11	63	122.47	185	343.5	484	1031.77	946	1756.29	151	319.77	18	28.75	5	9.56	34	58.63	224	340.47	35	62.98	49	76.25	1
BMK_Unigene_147510	0	0	0	0	0	0	93	10.78	32	3.46	29	3.63	0	0	0	0	0	0	201	27.05	163	17.21	152	19.79	0	0	0	0	0	0	0	0	0	0	0	0	22	2.51	6	0.75	15	1.98	8	1.01	10	1.27	4	0.48	0
BMK_Unigene_143664	956	40.08	795	33.61	1042	43.19	104	3.75	36	1.19	135	5.27	337	12.45	877	27.59	468	21.69	24	1.01	154	5.17	0	0	93	3.62	513	20.82	385	14.96	760	31.73	346	12.97	575	24.16	1326	46.92	480	18.49	1082	44.51	56	2.23	76	3.02	809	30.29	152
BMK_Unigene_004324	2632	96.76	2220	82.34	2929	106.49	143	4.53	55	1.59	186	6.36	197	6.38	423	11.67	372	15.1	100	3.68	319	9.41	74	2.64	197	6.73	1320	46.97	692	23.57	2134	78.07	1128	37.04	1871	68.87	1698	52.65	937	31.63	1734	62.53	137	4.79	126	4.38	1334	43.81	273
BMK_Unigene_002507	1696	31.19	1042	19.37	1415	25.76	1773	28.04	559	8.02	134	2.29	258	4.16	526	7.25	429	8.67	84	1.54	170	2.52	59	1.05	68	1.16	768	13.66	316	5.37	819	14.95	544	8.9	544	9.98	986	15.26	416	7.01	1020	18.38	74	1.3	64	1.11	872	14.33	341
BMK_Unigene_150098	1566	60.41	1328	51.67	1854	70.73	249	8.27	143	4.33	1250	44.85	61	2.07	182	5.27	118	5.03	643	24.8	228	7.05	7	0.26	71	2.54	859	32.08	456	16.3	849	32.6	520	17.93	899	34.74	372	12.11	284	10.06	415	15.71	40	1.47	29	1.06	293	10.1	133
BMK_Unigene_153459	1308	76.99	1369	81.13	1284	74.63	105	5.35	34	1.58	62	3.44	512	26.65	830	36.69	575	37.56	10	0.59	64	3.02	7	0.4	801	43.73	979	55.82	645	35.28	1556	91.42	1312	69.3	1178	69.7	532	26.48	238	12.9	427	24.68	240	13.41	113	6.35	518	27.25	861
BMK_Unigene_070833	145	13.43	120	11.16	128	11.7	121	9.69	58	4.28	30	2.59	60	4.94	156	10.89	65	6.75	44	4.09	11	0.81	32	2.88	6	0.51	97	8.73	45	3.9	60	5.58	25	2.1	50	4.69	138	10.86	92	7.89	172	15.68	29	2.54	24	2.11	119	9.85	68
BMK_Unigene_079222	2230	124.23	2006	112.54	2489	137	2906	139.54	2193	96.37	1442	74.79	116	5.71	186	7.78	239	14.77	1489	83.03	938	41.78	515	27.89	145	7.5	1218	65.75	653	33.81	1429	79.46	714	35.69	1180	66.06	1494	70.36	995	51.03	1423	77.84	224	11.85	226	11.93	929	46.23	142
[truncated: 217 more columns]
