# Supplementary material
Source: MDPI journal article supplement (https://www.mdpi.com/1999-4907/15/4/618)
Supplement: s1 [file s1 › Supplementary Table S10.xlsx]

## Sheet: Sheet1
Supplementary Table S10:The DEGs in the pathway of plant-pathogen interaction
#ID	GGr-1_count	GGr-1_FPKM	GGr-2_count	GGr-2_FPKM	GGr-3_count	GGr-3_FPKM	GGs-1_count	GGs-1_FPKM	GGs-2_count	GGs-2_FPKM	GGs-3_count	GGs-3_FPKM	GSr-1_count	GSr-1_FPKM	GSr-2_count	GSr-2_FPKM	GSr-3_count	GSr-3_FPKM	GSs-1_count	GSs-1_FPKM	GSs-2_count	GSs-2_FPKM	GSs-3_count	GSs-3_FPKM	SGr-1_count	SGr-1_FPKM	SGr-2_count	SGr-2_FPKM	SGr-3_count	SGr-3_FPKM	SGr2-1_count	SGr2-1_FPKM	SGr2-2_count	SGr2-2_FPKM	SGr2-3_count	SGr2-3_FPKM	SGs-1_count	SGs-1_FPKM	SGs-2_count	SGs-2_FPKM	SGs-3_count	SGs-3_FPKM	SGs2-1_count	SGs2-1_FPKM	SGs2-2_count	SGs2-2_FPKM	SGs2-3_count	SGs2-3_FPKM	SSr-1_count
BMK_Unigene_074942	136	7.47	260	14.29	27	1.49	921	43.34	675	29.08	214	10.87	243	11.7	1173	48.1	106	6.43	496	27.1	70	3.09	1450	76.95	53	2.7	515	27.26	1343	68.1	186	10.13	173	8.51	151	8.3	4476	206.47	2433	122.23	3117	167	8246	427.2	8070	417.09	3416	166.51	275
BMK_Unigene_154244	113	2.72	141	3.43	73	1.74	249	5.15	193	3.63	190	4.25	29	0.61	16	0.29	32	0.85	670	16.11	162	3.13	213	4.98	422	9.44	74	1.72	218	4.85	209	4.99	319	6.84	465	11.18	17	0.34	30	0.66	17	0.4	427	9.78	431	9.81	198	4.26	28
BMK_Unigene_148617	259	17.69	323	22.19	304	20.5	91	5.36	79	4.27	98	6.24	48	2.9	10	0.51	110	8.36	28	1.92	29	1.58	26	1.73	99	6.27	447	29.61	209	13.3	177	12.09	278	17.09	280	19.27	174	10.06	126	7.94	124	8.32	137	8.88	167	10.81	101	6.16	170
BMK_Unigene_068589	100	7.44	95	7.11	53	3.89	1062	68.21	584	34.48	170	11.79	217	14.31	512	28.67	90	7.47	516	38.49	536	31.79	1248	90.31	99	6.83	374	27.01	496	34.42	178	13.27	590	39.59	234	17.57	1606	101.28	838	57.57	1154	84.43	2705	190.88	2335	164.82	1162	77.25	239
BMK_Unigene_153077	92	2.62	111	3.19	101	2.85	163	4	152	3.39	101	2.68	23	0.58	60	1.28	29	0.91	672	19.14	702	16.07	1034	28.64	594	15.73	180	4.96	494	13.02	366	10.37	332	8.43	425	12.11	7	0.17	12	0.31	25	0.7	36	0.98	18	0.49	22	0.56	0
BMK_Unigene_068030	16	2.46	61	9.37	47	7.11	121	16.15	50	6.25	129	18.58	6	0.83	2	0.23	110	19.28	0	0	11	1.33	0	0	0	0	21	3.15	122	17.75	19	2.97	64	9.05	30	4.73	17	2.24	126	18.09	2	0.3	0	0	42	6.16	0	0	118
BMK_Unigene_155723	245	7.54	179	5.56	297	9.04	107	2.83	133	3.21	89	2.55	103	2.79	97	2.24	184	6.24	165	5.08	170	4.2	184	5.5	226	6.46	430	12.8	275	7.83	275	8.41	277	7.6	251	7.73	120	3.11	31	0.88	84	2.53	110	3.22	67	1.95	85	2.34	131
BMK_Unigene_069952	28	3.75	52	6.96	81	10.67	77	8.93	105	11.34	53	6.63	31	3.71	54	5.46	5	0.76	78	10.5	19	2.01	42	5.47	45	5.57	37	4.82	69	8.7	9	1.22	16	1.96	39	5.33	82	9.36	166	20.67	123	16.24	83	10.48	79	10.06	88	10.52	113
BMK_Unigene_156795	188	2.81	280	4.24	276	4.09	532	6.84	442	5.16	513	7.13	205	2.69	165	1.85	404	6.64	145	2.17	113	1.36	114	1.66	362	5.04	336	4.86	324	4.47	325	4.82	438	5.82	417	6.22	166	2.09	262	3.59	178	2.61	142	2.02	80	1.13	283	3.78	361
BMK_Unigene_078454	715	23.22	1440	47.21	281	9.06	1202	33.6	1587	40.39	715	21.62	442	12.64	824	20.09	194	6.95	548	17.82	1631	42.52	1166	36.83	1192	35.97	1134	35.67	1156	34.77	770	24.9	1670	48.42	1223	39.77	556	15.24	449	13.38	398	12.7	1384	42.76	1358	41.74	603	17.5	401
BMK_Unigene_067463	1	0.1	6	0.61	109	10.92	4	0.35	8	0.65	9	0.85	30	2.71	36	2.76	14	1.6	6	0.61	7	0.56	8	0.79	54	5.08	42	4.15	305	29.02	51	5.21	69	6.36	14	1.44	449	38.77	108	10.16	526	52.6	108	10.38	85	8.2	23	2.09	118
BMK_Unigene_071352	267	14.37	357	19.35	227	12.07	137	6.35	76	3.22	107	5.36	123	5.84	698	28.21	183	10.92	35	1.89	80	3.44	79	4.13	190	9.49	252	13.14	505	25.25	471	25.29	280	13.51	275	14.87	393	17.87	290	14.36	324	17.12	536	27.39	241	12.28	304	14.61	320
BMK_Unigene_148402	537	41.51	451	35.04	503	38.38	177	11.81	125	7.67	147	10.59	367	25.14	526	30.59	398	34.33	279	21.62	297	18.29	276	20.74	297	21.28	663	49.73	436	31.44	573	44.37	554	38.63	545	42.52	334	21.88	401	28.62	304	23.1	469	34.36	381	27.93	414	28.58	702
BMK_Unigene_156064	118	3.38	460	13.32	383	10.88	519	12.81	213	4.78	437	11.66	56	1.42	2	0.04	323	10.22	1	0.03	41	0.95	1	0.03	0	0	215	5.98	413	10.96	117	3.34	400	10.24	351	10.05	29	0.7	319	8.4	9	0.28	0	0	93	2.52	1	0.03	211
BMK_Unigene_137358	1	0.07	1	0.07	0	0	243	13.83	116	6.11	62	3.81	0	0	0	0	0	0	46	3.04	23	1.21	28	1.8	0	0	0	0	0	0	0	0	0	0	0	0	6	0.34	3	0.18	1	0.06	5	0.31	6	0.38	2	0.12	0
BMK_Unigene_145035	128	8.11	196	12.5	89	5.57	26	1.42	15	0.75	148	8.73	25	1.4	78	3.71	13	0.92	139	8.82	19	0.96	2	0.12	5	0.29	13	0.8	21	1.24	38	2.41	22	1.25	23	1.47	60	3.22	36	2.1	32	1.99	2	0.12	11	0.66	16	0.91	4
BMK_Unigene_147870	146	6.08	158	6.61	166	6.8	71	2.57	100	3.28	133	5.12	566	20.65	617	19.18	325	14.87	109	4.52	261	8.67	87	3.51	159	6.12	222	8.91	210	8.08	314	12.95	323	11.98	262	10.91	255	8.91	184	7	210	8.54	304	11.97	156	6.14	270	10.01	497
BMK_Unigene_154924	42	0.9	128	2.72	36	0.76	105	1.91	176	2.89	181	3.55	107	1.97	100	1.57	90	2.08	333	7	5611	94.69	551	11.24	214	4.18	120	2.44	253	4.92	304	6.33	526	9.83	289	6.07	50	0.88	52	1	32	0.66	59	1.18	66	1.31	68	1.27	86
BMK_Unigene_149652	115	5.96	201	10.49	53	2.71	58	2.59	94	3.84	46	2.22	82	3.75	116	4.51	29	1.67	86	4.46	170	7.05	134	6.75	21	1.01	27	1.36	74	3.56	55	2.84	109	5.06	70	3.64	281	12.3	271	12.92	182	9.26	1248	61.4	1209	59.32	436	20.18	49
BMK_Unigene_077616	12	1.31	24	2.63	40	4.31	23	2.17	29	2.54	29	2.96	17	1.65	14	1.15	22	2.71	51	5.6	71	6.15	67	7.12	35	3.54	35	3.72	42	4.3	42	4.62	27	2.68	39	4.33	40	3.72	30	3.04	16	1.72	33	3.41	16	1.66	21	2.05	42
BMK_Unigene_079580	118	4.09	121	4.23	89	3.05	115	3.43	123	3.34	144	4.64	89	2.71	185	4.81	55	2.1	116	4.02	168	4.67	119	4.01	38	1.22	57	1.91	117	3.75	103	3.55	154	4.76	101	3.5	204	5.96	115	3.66	155	5.27	346	11.4	281	9.21	179	5.54	61
BMK_Unigene_074423	65	4.01	316	19.62	171	10.42	430	22.87	148	7.21	340	19.53	10	0.55	7	0.32	109	7.47	0	0	10	0.49	0	0	0	0	113	6.76	540	30.99	26	1.6	396	21.95	22	1.37	14	0.73	32	1.82	0	0	0	0	8	0.47	0	0	55
BMK_Unigene_155062	1023	30.35	977	29.28	993	29.15	142	3.62	199	4.64	438	12.09	534	13.93	854	19	795	26	315	9.36	95	2.28	67	1.96	64	1.76	462	13.29	204	5.6	318	9.38	463	12.25	438	13.02	233	5.82	105	2.86	150	4.36	14	0.4	26	0.73	27	0.72	188
BMK_Unigene_147533	119	4.14	109	3.82	110	3.78	96	2.87	97	2.64	81	2.62	0	0	0	0	0	0	171	5.98	203	5.66	209	7.06	118	3.81	98	3.3	143	4.61	102	3.53	127	3.94	139	4.84	0	0	0	0	0	0	0	0	0	0	0	0	0
BMK_Unigene_071445	35	3.41	77	7.53	109	10.48	41	3.45	195	15.18	64	5.82	158	13.69	340	24.97	26	2.84	10	0.98	30	2.32	9	0.85	51	4.6	60	5.68	1132	103.29	150	14.7	152	13.43	73	7.21	676	55.98	466	42.06	463	44.42	585	53.97	440	40.73	114	9.92	75
BMK_Unigene_084037	19	1.21	7	0.45	23	1.45	119	6.55	63	3.18	58	3.45	4	0.23	24	1.15	29	2.06	183	11.69	386	19.66	268	16.62	6	0.36	25	1.55	28	1.66	29	1.85	17	0.98	43	2.76	714	38.54	487	28.64	536	33.59	902	54.6	709	42.87	399	22.74	62
BMK_Unigene_129551	3	0.5	2	0.33	7	1.15	56	8.12	173	23.55	27	4.22	3	0.45	0	0	0	0	7	1.18	11	1.44	7	1.14	3	0.46	6	0.98	15	2.37	13	2.21	13	2	0	0	0	0	0	0	0	0	0	0	0	0	0	0	0
BMK_Unigene_137068	1	0.05	2	0.11	2	0.11	23	1.08	8	0.34	6	0.3	42	2.02	194	7.92	37	2.23	0	0	12	0.52	5	0.26	2	0.1	2	0.11	149	7.53	2	0.11	1	0.05	1	0.05	394	18.11	399	19.97	340	18.15	1182	61.03	825	42.5	456	22.15	105
BMK_Unigene_156789	448	9.97	400	8.99	414	9.12	297	5.68	232	4.03	249	5.15	113	2.21	55	0.92	109	2.67	217	4.82	66	1.18	221	4.78	263	5.44	770	16.57	357	7.34	460	10.16	599	11.86	375	8.33	834	15.62	886	18.07	610	13.3	674	14.27	830	17.46	493	9.8	447
BMK_Unigene_073127	164	15.37	192	18.05	134	12.38	3	0.24	1	0.07	15	1.31	653	54.36	454	32.04	316	33.18	3	0.28	19	1.41	7	0.64	9	0.78	253	23.03	90	7.89	359	33.79	515	43.7	356	33.77	140	11.14	46	3.99	53	4.89	87	7.72	32	2.85	22	1.84	346
BMK_Unigene_073923	0	0	0	0	0	0	8	0.44	6	0.27	4	0.21	0	0	0	0	0	0	0	0	1	0.04	2	0.11	0	0	0	0	0	0	0	0	0	0	0	0	54	2.57	49	2.54	51	2.82	30	1.6	17	0.91	22	1.11	0
BMK_Unigene_151300	226	13.22	100	5.89	172	9.94	121	6.1	105	4.85	56	3.05	74	3.82	165	7.25	45	2.92	258	15.11	206	9.63	338	19.22	182	9.88	265	15.02	173	9.41	252	14.72	267	14.02	300	17.64	125	6.18	86	4.63	113	6.49	192	10.66	144	7.98	98	5.12	103
BMK_Unigene_083534	352	10.38	545	16.23	515	15.03	200	5.08	140	3.23	223	6.12	162	4.2	87	1.92	261	8.48	73	2.15	56	1.33	61	1.75	253	6.93	589	16.81	421	11.49	272	7.98	364	9.58	431	12.71	376	9.35	262	7.09	255	7.38	324	9.09	274	7.65	217	5.72	408
BMK_Unigene_156782	358	6.34	662	11.84	319	5.6	398	6.07	320	4.43	473	7.79	1000	15.54	460	6.11	678	13.18	269	4.75	146	2.09	165	2.84	1860	30.6	1456	24.92	639	10.45	607	10.66	866	13.63	465	8.22	425	6.33	355	5.75	280	4.86	855	14.41	1017	17.02	251	3.97	783
BMK_Unigene_079367	254	8.55	583	19.77	155	5.17	196	5.68	225	5.94	193	6.03	190	5.63	252	6.35	127	4.72	160	5.39	141	3.81	255	8.33	145	4.52	195	6.35	288	8.97	216	7.22	348	10.43	249	8.38	320	9.07	281	8.67	211	6.96	1020	32.55	731	23.21	272	8.16	257
BMK_Unigene_071306	55	1.7	226	7.08	36	1.12	141	3.77	259	6.28	205	5.92	0	0	0	0	0	0	401	12.41	3378	83.93	671	20.18	85	2.44	70	2.11	312	8.93	407	12.54	619	17.09	367	11.38	0	0	0	0	0	0	1	0.03	0	0	0	0	0
BMK_Unigene_083236	116	4.88	112	4.79	84	3.49	160	5.79	264	8.72	113	4.42	70	2.59	14	0.44	92	4.27	204	8.58	72	2.43	187	7.64	89	3.47	64	2.6	57	2.22	99	4.14	174	6.54	55	2.32	37	1.31	15	0.58	26	1.07	33	1.32	98	3.9	44	1.65	405
BMK_Unigene_153241	73	1.83	67	1.7	50	1.24	381	8.23	214	4.2	201	4.69	11	0.24	67	1.26	12	0.33	195	4.89	2072	41.8	404	9.85	215	5.01	100	2.43	240	5.57	234	5.83	234	5.23	176	4.41	275	5.81	171	3.93	274	6.74	311	7.43	272	6.46	125	2.8	12
BMK_Unigene_069505	1	0.03	12	0.39	4	0.13	266	7.31	315	7.88	207	6.15	0	0	0	0	0	0	47	1.5	22	0.56	47	1.46	0	0	18	0.56	7	0.21	4	0.13	3	0.09	0	0	0	0	0	0	0	0	0	0	0	0	0	0	0
BMK_Unigene_155497	520	10.5	492	10.04	615	12.29	231	4.01	242	3.82	262	4.92	236	4.18	511	7.73	156	3.46	160	3.23	197	3.2	103	2.02	224	4.21	347	6.78	262	4.89	450	9.02	388	6.97	439	8.85	412	7.01	269	4.98	402	7.96	117	2.25	95	1.81	582	10.5	312
BMK_Unigene_072807	548	28.98	493	26.26	611	31.93	103	4.69	68	2.83	109	5.37	102	4.76	161	6.39	105	6.15	111	5.87	41	1.73	9	0.46	18	0.88	242	12.4	162	7.96	240	12.66	158	7.49	211	11.21	279	12.47	180	8.76	274	14.22	30	1.51	45	2.25	180	8.5	67
BMK_Unigene_072357	2	0.27	4	0.54	2	0.26	2	0.23	10	1.08	0	0	67	8.02	85	8.59	37	5.61	2	0.27	0	0	3	0.39	8	0.99	4	0.52	43	5.42	5	0.68	4	0.49	1	0.14	53	6.05	41	5.11	41	5.41	92	11.62	67	8.53	47	5.62	135
BMK_Unigene_119186	48	31.63	66	41.72	35	22.22	28	16.1	36	21.96	37	23.28	5	3.16	15	7.63	12	10.11	86	57.45	613	291.77	104	66.63	173	102.86	92	61.14	57	37.92	113	81.41	129	85.37	66	48.21	0	0	1	0.65	7	4.61	3	1.79	4	2.57	10	5.84	56
BMK_Unigene_134691	174	20.22	157	18.28	154	17.63	153	15.39	151	14.09	134	14.55	221	22.91	493	43.23	176	23.07	277	32.34	484	44.51	392	44.31	149	16.02	104	11.76	558	60.91	106	12.42	117	12.38	129	15.25	427	42.26	390	42.08	328	37.56	1330	146.1	920	101.65	759	78.78	155
BMK_Unigene_156691	954	15.67	995	16.51	998	16.23	1009	14.25	926	11.87	1089	16.61	207	2.98	251	3.09	316	5.7	481	7.9	402	5.32	360	5.76	863	13.18	1180	18.74	804	12.19	793	12.92	963	14.05	838	13.73	308	4.25	450	6.77	253	4.07	306	4.78	279	4.33	294	4.31	494
BMK_Unigene_080856	223	6.55	225	6.67	201	5.84	133	3.36	59	1.36	120	3.28	703	18.15	655	14.42	307	9.93	68	2	425	10.02	29	0.83	512	13.97	150	4.26	299	8.12	198	5.78	235	6.15	292	8.57	321	7.94	377	10.16	273	7.86	416	11.62	248	6.89	292	7.66	782
BMK_Unigene_135815	6	0.8	8	1.06	4	0.52	14	1.61	24	2.57	6	0.74	656	77.88	1047	104.99	228	34.28	8	1.07	90	9.43	12	1.55	135	16.57	34	4.4	523	65.39	75	10.07	18	2.19	36	4.88	129	14.61	130	16.06	67	8.77	376	47.12	83	10.48	45	5.33	25
BMK_Unigene_152184	42	1.44	91	3.15	48	1.63	24	0.71	22	0.59	35	1.12	12	0.36	66	1.7	0	0	228	7.81	119	3.27	285	9.5	96	3.06	78	2.59	284	9.01	52	1.77	96	2.94	99	3.4	1685	48.71	893	28.1	1307	43.94	993	32.37	2219	71.97	674	20.64	10
BMK_Unigene_150510	263	8.94	104	3.6	157	5.31	47	1.38	10	0.27	150	4.77	12	0.36	3	0.08	14	0.52	0	0	2	0.05	4	0.13	646	20.4	639	21.03	127	4.01	442	14.95	418	12.68	197	6.7	49	1.4	89	2.78	38	1.27	7	0.23	3	0.1	27	0.82	166
BMK_Unigene_144242	1665	114.68	1850	128.17	1886	128.27	1895	112.6	1597	87.1	2377	152.54	1499	91.36	2125	110.05	1388	106.43	830	57.27	628	34.5	689	46.14	2916	186.25	2762	184.51	2342	150.25	4689	323.08	2926	181.42	6365	441.71	924	53.89	803	51.01	768	51.98	623	40.7	1107	72.29	954	58.69	6547
BMK_Unigene_153654	10	0.28	23	0.66	10	0.28	7	0.17	4	0.09	11	0.29	5	0.12	2	0.04	14	0.44	1	0.03	1663	37.7	8	0.22	34	0.89	36	0.98	69	1.8	31	0.87	17	0.43	17	0.48	41	0.97	57	1.48	46	1.27	2	0.05	2	0.05	68	1.71	11
BMK_Unigene_000899	3442	75.55	4292	95.18	3205	69.63	131	2.47	195	3.34	171	3.49	0	0	0	0	6	0.14	28	0.61	44	0.78	18	0.38	236	4.81	2424	51.46	421	8.54	695	15.14	922	18.01	820	17.97	0	0	0	0	0	0	0	0	0	0	0	0	1
BMK_Unigene_074775	311	21.12	233	15.92	367	24.61	51	2.99	21	1.13	74	4.68	41	2.46	49	2.5	75	5.67	71	4.83	9	0.49	80	5.28	0	0	45	2.96	15	0.95	6	0.41	29	1.77	51	3.49	69	3.97	37	2.32	82	5.47	0	0	11	0.71	1	0.06	403
BMK_Unigene_155908	966	27.97	955	27.91	905	25.92	1616	40.26	1317	29.85	1225	32.97	679	17.28	823	17.87	420	13.39	977	28.27	1102	25.63	1337	37.62	1263	33.97	1481	41.48	1365	36.56	1119	32.2	1399	36.11	1231	35.63	1691	41.26	1180	31.34	1258	35.71	2465	67.89	2378	65.12	1574	40.71	1583
BMK_Unigene_000103	420	15.97	534	20.43	374	14.03	105	3.43	109	3.25	106	3.74	339	11.32	471	13.41	365	15.29	75	2.85	44	1.34	78	2.88	146	5.14	385	14.14	313	11	269	10.16	345	11.69	329	12.5	410	13.12	199	6.93	266	9.9	335	12.08	223	8.01	234	7.93	281
BMK_Unigene_078950	0	0	10	0.43	4	0.17	2397	88.16	2743	92.06	1547	61.47	4	0.15	0	0	0	0	3019	128.96	814	27.86	2499	103.74	23	0.91	4	0.17	23	0.91	24	1.02	12	0.46	44	1.88	737	26.57	358	14.05	604	25.31	323	13.11	655	26.48	644	24.57	1
BMK_Unigene_156676	629	13.04	573	12.01	571	11.72	102	1.82	39	0.63	80	1.54	69	1.26	152	2.36	75	1.71	57	1.18	120	2	55	1.11	133	2.56	409	8.2	233	4.46	633	13.03	309	5.7	503	10.41	544	9.5	246	4.67	513	10.43	78	1.54	36	0.71	348	6.45	63
BMK_Unigene_079794	45	1.08	76	1.83	94	2.22	299	6.14	278	5.19	284	6.31	188	3.95	135	2.42	161	4.23	99	2.36	112	2.15	113	2.62	122	2.71	102	2.36	201	4.44	81	1.92	89	1.89	79	1.89	392	7.89	512	11.21	283	6.63	193	4.39	239	5.4	507	10.82	347
BMK_Unigene_143484	8	0.69	40	3.45	27	2.29	84	6.24	68	4.65	115	9.22	10	0.76	13	0.84	2	0.19	12	1.03	7	0.48	19	1.59	13	1.04	38	3.17	32	2.57	10	0.86	51	3.96	23	2	5	0.36	22	1.75	15	1.27	13	1.06	11	0.9	4	0.31	3
BMK_Unigene_070786	118	13.49	85	9.73	57	6.42	11	1.09	20	1.83	3	0.32	242	24.66	136	11.73	118	15.2	5	0.57	89	8.05	46	5.11	49	5.18	175	19.45	1342	143.99	148	17.05	336	34.96	146	16.96	735	71.51	96	10.18	709	79.83	3788	409.22	826	89.73	755	77.06	74
BMK_Unigene_133719	136	16.63	88	10.77	90	10.84	928	98.24	2306	226.82	1079	123.27	41	4.48	154	14.21	8	1.1	165	20.28	94	9.09	329	39.13	182	20.59	1415	168.39	1509	173.48	216	26.66	286	31.9	478	59.51	952	99.2	535	60.78	730	87.99	247	28.53	283	32.91	92	10.05	17
[truncated: 217 more columns]
