# Supplementary material
Source: MDPI journal article supplement (https://www.mdpi.com/1999-4907/15/4/618)
Supplement: s1 [file s1 › Supplementary Table S11.xlsx]

## Sheet: Sheet1
Supplementary Table S11:The DEGs in the pathway of MAPK signaling pathway
#ID	GGr-1_count	GGr-1_FPKM	GGr-2_count	GGr-2_FPKM	GGr-3_count	GGr-3_FPKM	GGs-1_count	GGs-1_FPKM	GGs-2_count	GGs-2_FPKM	GGs-3_count	GGs-3_FPKM	GSr-1_count	GSr-1_FPKM	GSr-2_count	GSr-2_FPKM	GSr-3_count	GSr-3_FPKM	GSs-1_count	GSs-1_FPKM	GSs-2_count	GSs-2_FPKM	GSs-3_count	GSs-3_FPKM	SGr-1_count	SGr-1_FPKM	SGr-2_count	SGr-2_FPKM	SGr-3_count	SGr-3_FPKM	SGr2-1_count	SGr2-1_FPKM	SGr2-2_count	SGr2-2_FPKM	SGr2-3_count	SGr2-3_FPKM	SGs-1_count	SGs-1_FPKM	SGs-2_count	SGs-2_FPKM	SGs-3_count	SGs-3_FPKM	SGs2-1_count	SGs2-1_FPKM	SGs2-2_count	SGs2-2_FPKM	SGs2-3_count	SGs2-3_FPKM	SSr-1_count
BMK_Unigene_150685	107	4.92	84	3.89	101	4.59	574	22.72	583	21.07	626	26.77	291	11.79	707	24.39	319	16.22	231	10.62	6968	256.45	248	11.08	269	11.48	374	16.65	961	40.97	290	13.28	145	5.97	89	4.1	1822	70.7	1977	83.54	1969	88.81	734	32.05	1671	72.71	1829	75.08	489
BMK_Unigene_155366	2636	78.16	3206	95.97	3107	91.14	4365	111.37	3527	81.88	3871	106.72	3806	99.23	4847	107.77	2032	66.38	7036	208.53	13366	318.31	7166	206.54	2991	82.39	2329	66.81	2599	71.3	4104	120.95	2486	65.73	3563	105.64	3639	90.94	2994	81.45	3167	92.08	7425	209.43	5964	167.28	6970	184.62	3175
BMK_Unigene_154244	113	2.72	141	3.43	73	1.74	249	5.15	193	3.63	190	4.25	29	0.61	16	0.29	32	0.85	670	16.11	162	3.13	213	4.98	422	9.44	74	1.72	218	4.85	209	4.99	319	6.84	465	11.18	17	0.34	30	0.66	17	0.4	427	9.78	431	9.81	198	4.26	28
BMK_Unigene_068589	100	7.44	95	7.11	53	3.89	1062	68.21	584	34.48	170	11.79	217	14.31	512	28.67	90	7.47	516	38.49	536	31.79	1248	90.31	99	6.83	374	27.01	496	34.42	178	13.27	590	39.59	234	17.57	1606	101.28	838	57.57	1154	84.43	2705	190.88	2335	164.82	1162	77.25	239
BMK_Unigene_114112	0	0	0	0	1	0.36	0	0	0	0	0	0	0	0	5	1.42	0	0	0	0	0	0	0	0	0	0	0	0	0	0	0	0	0	0	1	0.4	33	10.74	22	7.85	27	10.01	28	9.64	40	14.33	15	4.97	0
BMK_Unigene_079062	66	2.61	85	3.4	93	3.64	413	14.09	549	17.08	379	13.97	43	1.5	42	1.25	59	2.58	157	6.22	120	3.81	141	5.43	12	0.44	84	3.22	88	3.23	36	1.42	70	2.48	51	2.02	21	0.7	18	0.66	7	0.27	7	0.26	1	0.04	9	0.32	35
BMK_Unigene_078454	715	23.22	1440	47.21	281	9.06	1202	33.6	1587	40.39	715	21.62	442	12.64	824	20.09	194	6.95	548	17.82	1631	42.52	1166	36.83	1192	35.97	1134	35.67	1156	34.77	770	24.9	1670	48.42	1223	39.77	556	15.24	449	13.38	398	12.7	1384	42.76	1358	41.74	603	17.5	401
BMK_Unigene_071352	267	14.37	357	19.35	227	12.07	137	6.35	76	3.22	107	5.36	123	5.84	698	28.21	183	10.92	35	1.89	80	3.44	79	4.13	190	9.49	252	13.14	505	25.25	471	25.29	280	13.51	275	14.87	393	17.87	290	14.36	324	17.12	536	27.39	241	12.28	304	14.61	320
BMK_Unigene_148402	537	41.51	451	35.04	503	38.38	177	11.81	125	7.67	147	10.59	367	25.14	526	30.59	398	34.33	279	21.62	297	18.29	276	20.74	297	21.28	663	49.73	436	31.44	573	44.37	554	38.63	545	42.52	334	21.88	401	28.62	304	23.1	469	34.36	381	27.93	414	28.58	702
BMK_Unigene_143831	52	4.1	41	3.25	52	4.04	12	0.82	5	0.31	25	1.84	50	3.49	124	7.35	40	3.52	9	0.71	751	47.12	5	0.38	5	0.37	43	3.29	212	15.58	78	6.16	19	1.35	46	3.66	176	11.75	354	25.76	138	10.69	61	4.55	78	5.83	137	9.64	12
BMK_Unigene_147677	1066	60.03	607	34.43	963	53.59	285	13.84	304	13.51	980	51.39	1425	70.87	2677	113.26	426	26.62	655	36.93	189	8.51	33	1.81	70	3.66	596	32.53	283	14.81	281	15.8	91	4.6	265	15	393	18.71	488	25.31	273	15.1	77	4.12	92	4.91	228	11.47	195
BMK_Unigene_155062	1023	30.35	977	29.28	993	29.15	142	3.62	199	4.64	438	12.09	534	13.93	854	19	795	26	315	9.36	95	2.28	67	1.96	64	1.76	462	13.29	204	5.6	318	9.38	463	12.25	438	13.02	233	5.82	105	2.86	150	4.36	14	0.4	26	0.73	27	0.72	188
BMK_Unigene_072792	2	0.13	11	0.53	11	0.55	19	0.76	6	0.25	40	1.73	74	3.06	161	5.64	262	13.46	4	0.22	137	5.11	4	0.21	155	6.71	108	4.87	241	10.38	45	2.13	14	0.59	67	3.12	1178	46.17	868	37.06	864	39.38	553	24.41	1208	53.1	942	39.06	392
BMK_Unigene_065118	0	0	0	0	0	0	0	0	0	0	0	0	160	21.29	265	29.78	60	10.28	0	0	15	1.85	0	0	7	1.06	0	0	5	0.71	2	0.31	9	1.33	3	0.48	106	13.52	20	2.79	93	13.74	434	60.79	269	38.11	151	20.07	31
BMK_Unigene_137068	1	0.05	2	0.11	2	0.11	23	1.08	8	0.34	6	0.3	42	2.02	194	7.92	37	2.23	0	0	12	0.52	5	0.26	2	0.1	2	0.11	149	7.53	2	0.11	1	0.05	1	0.05	394	18.11	399	19.97	340	18.15	1182	61.03	825	42.5	456	22.15	105
BMK_Unigene_073127	164	15.37	192	18.05	134	12.38	3	0.24	1	0.07	15	1.31	653	54.36	454	32.04	316	33.18	3	0.28	19	1.41	7	0.64	9	0.78	253	23.03	90	7.89	359	33.79	515	43.7	356	33.77	140	11.14	46	3.99	53	4.89	87	7.72	32	2.85	22	1.84	346
BMK_Unigene_151300	226	13.22	100	5.89	172	9.94	121	6.1	105	4.85	56	3.05	74	3.82	165	7.25	45	2.92	258	15.11	206	9.63	338	19.22	182	9.88	265	15.02	173	9.41	252	14.72	267	14.02	300	17.64	125	6.18	86	4.63	113	6.49	192	10.66	144	7.98	98	5.12	103
BMK_Unigene_146788	238	11.52	450	21.87	406	19.35	36	1.5	48	1.82	17	0.76	64	2.72	123	4.45	101	5.39	13	0.63	67	2.59	0	0	39	1.75	166	7.75	238	10.65	132	6.35	144	6.22	150	7.26	111	4.52	82	3.65	119	5.63	14	0.64	19	0.87	94	4.05	44
BMK_Unigene_155497	520	10.5	492	10.04	615	12.29	231	4.01	242	3.82	262	4.92	236	4.18	511	7.73	156	3.46	160	3.23	197	3.2	103	2.02	224	4.21	347	6.78	262	4.89	450	9.02	388	6.97	439	8.85	412	7.01	269	4.98	402	7.96	117	2.25	95	1.81	582	10.5	312
BMK_Unigene_072807	548	28.98	493	26.26	611	31.93	103	4.69	68	2.83	109	5.37	102	4.76	161	6.39	105	6.15	111	5.87	41	1.73	9	0.46	18	0.88	242	12.4	162	7.96	240	12.66	158	7.49	211	11.21	279	12.47	180	8.76	274	14.22	30	1.51	45	2.25	180	8.5	67
BMK_Unigene_119186	48	31.63	66	41.72	35	22.22	28	16.1	36	21.96	37	23.28	5	3.16	15	7.63	12	10.11	86	57.45	613	291.77	104	66.63	173	102.86	92	61.14	57	37.92	113	81.41	129	85.37	66	48.21	0	0	1	0.65	7	4.61	3	1.79	4	2.57	10	5.84	56
BMK_Unigene_134691	174	20.22	157	18.28	154	17.63	153	15.39	151	14.09	134	14.55	221	22.91	493	43.23	176	23.07	277	32.34	484	44.51	392	44.31	149	16.02	104	11.76	558	60.91	106	12.42	117	12.38	129	15.25	427	42.26	390	42.08	328	37.56	1330	146.1	920	101.65	759	78.78	155
BMK_Unigene_147806	119	8.76	448	33.17	113	8.21	86	5.46	82	4.79	101	6.93	1857	121.09	1973	109.27	777	63.77	84	6.2	3584	210.33	451	32.29	2791	190.52	435	31.07	3381	232.06	1268	93.47	1932	128.21	718	53.31	703	43.85	1035	70.33	560	40.53	1966	137.24	930	64.94	2354	154.8	1477
BMK_Unigene_140168	133	18.91	304	43.19	73	10.21	57	7.03	50	5.75	18	2.39	55	7	168	18.05	12	1.94	158	22.6	3041	340.58	324	44.81	496	65.17	163	22.58	259	34.74	160	23.04	1473	191.95	294	42.73	234	28.42	135	17.88	156	21.89	293	39.29	223	30.19	140	17.77	26
BMK_Unigene_081088	140	2.92	134	2.83	96	1.98	496	8.9	351	5.72	424	8.22	1231	22.56	1608	25.15	563	12.91	889	18.53	1311	22.01	1098	22.27	434	8.42	202	4.08	512	9.87	329	6.81	266	4.94	337	7.02	1880	33.03	1638	31.32	1492	30.52	2369	47.06	2497	49.27	1635	30.48	1385
BMK_Unigene_152129	2027	71.63	1255	44.76	1960	68.5	466	14.18	360	9.99	1705	56.02	3031	94.24	6866	181.94	1363	53.16	987	34.88	275	7.82	58	2.01	50	1.65	813	27.83	457	14.97	428	15.07	266	8.39	602	21.3	898	26.77	1221	39.63	663	23.01	190	6.38	360	12.07	598	18.9	407
BMK_Unigene_153654	10	0.28	23	0.66	10	0.28	7	0.17	4	0.09	11	0.29	5	0.12	2	0.04	14	0.44	1	0.03	1663	37.7	8	0.22	34	0.89	36	0.98	69	1.8	31	0.87	17	0.43	17	0.48	41	0.97	57	1.48	46	1.27	2	0.05	2	0.05	68	1.71	11
BMK_Unigene_072612	18	0.79	90	3.96	36	1.55	81	3.05	55	1.89	91	3.7	783	30.13	924	30.28	217	10.48	273	11.92	410	14.34	240	10.19	325	13.17	91	3.85	172	6.96	234	10.18	615	24.02	337	14.75	343	12.64	331	13.28	286	12.25	1255	52.07	939	38.81	1156	45.08	656
BMK_Unigene_074775	311	21.12	233	15.92	367	24.61	51	2.99	21	1.13	74	4.68	41	2.46	49	2.5	75	5.67	71	4.83	9	0.49	80	5.28	0	0	45	2.96	15	0.95	6	0.41	29	1.77	51	3.49	69	3.97	37	2.32	82	5.47	0	0	11	0.71	1	0.06	403
BMK_Unigene_155908	966	27.97	955	27.91	905	25.92	1616	40.26	1317	29.85	1225	32.97	679	17.28	823	17.87	420	13.39	977	28.27	1102	25.63	1337	37.62	1263	33.97	1481	41.48	1365	36.56	1119	32.2	1399	36.11	1231	35.63	1691	41.26	1180	31.34	1258	35.71	2465	67.89	2378	65.12	1574	40.71	1583
BMK_Unigene_156676	629	13.04	573	12.01	571	11.72	102	1.82	39	0.63	80	1.54	69	1.26	152	2.36	75	1.71	57	1.18	120	2	55	1.11	133	2.56	409	8.2	233	4.46	633	13.03	309	5.7	503	10.41	544	9.5	246	4.67	513	10.43	78	1.54	36	0.71	348	6.45	63
BMK_Unigene_070786	118	13.49	85	9.73	57	6.42	11	1.09	20	1.83	3	0.32	242	24.66	136	11.73	118	15.2	5	0.57	89	8.05	46	5.11	49	5.18	175	19.45	1342	143.99	148	17.05	336	34.96	146	16.96	735	71.51	96	10.18	709	79.83	3788	409.22	826	89.73	755	77.06	74
BMK_Unigene_069498	37	4.03	74	8.07	14	1.5	1	0.09	0	0	8	0.81	9	0.87	94	7.71	8	0.98	13	1.42	8	0.69	16	1.69	0	0	118	12.49	22	2.25	4	0.44	14	1.39	10	1.11	67	6.2	25	2.52	26	2.79	264	27.17	159	16.44	44	4.28	33
[truncated: 217 more columns]
