# Supplementary material
Source: MDPI journal article supplement (https://www.mdpi.com/1999-4907/15/4/618)
Supplement: s1 [file s1 › Supplementary Table S12.xlsx]

## Sheet: Sheet1
Supplementary Table S12:The DEGs in the pathway of Zeatin biosynthesis
#ID	GGr-1_count	GGr-1_FPKM	GGr-2_count	GGr-2_FPKM	GGr-3_count	GGr-3_FPKM	GGs-1_count	GGs-1_FPKM	GGs-2_count	GGs-2_FPKM	GGs-3_count	GGs-3_FPKM	GSr-1_count	GSr-1_FPKM	GSr-2_count	GSr-2_FPKM	GSr-3_count	GSr-3_FPKM	GSs-1_count	GSs-1_FPKM	GSs-2_count	GSs-2_FPKM	GSs-3_count	GSs-3_FPKM	SGr-1_count	SGr-1_FPKM	SGr-2_count	SGr-2_FPKM	SGr-3_count	SGr-3_FPKM	SGr2-1_count	SGr2-1_FPKM	SGr2-2_count	SGr2-2_FPKM	SGr2-3_count	SGr2-3_FPKM	SGs-1_count	SGs-1_FPKM	SGs-2_count	SGs-2_FPKM	SGs-3_count	SGs-3_FPKM	SGs2-1_count	SGs2-1_FPKM	SGs2-2_count	SGs2-2_FPKM	SGs2-3_count	SGs2-3_FPKM	SSr-1_count
BMK_Unigene_077177	24	0.58	10	0.24	16	0.38	26	0.53	11	0.22	31	0.69	48	0.99	44	0.79	41	1.08	12	0.3	28	0.54	33	0.77	14	0.31	10	0.24	18	0.41	30	0.71	23	0.49	22	0.52	264	5.23	113	2.45	168	3.88	115	2.58	147	3.29	237	4.98	128
BMK_Unigene_080840	52	2.76	135	7.23	127	6.67	2481	113.64	2191	91.79	1094	54.13	443	20.78	260	10.38	155	9.13	1044	55.54	21925	932.09	1878	97.03	2943	145.16	55	2.83	1306	64.48	343	18.19	570	27.17	284	15.16	170	7.64	106	5.19	119	6.21	402	20.29	257	12.94	293	13.91	111
BMK_Unigene_145982	8	0.54	5	0.34	2	0.13	28	1.62	10	0.53	8	0.5	241	14.3	40	2.02	277	20.68	1	0.07	3	0.16	4	0.26	992	61.71	2	0.13	215	13.43	43	2.88	196	11.83	45	3.04	29	1.65	50	3.09	25	1.65	20	1.27	57	3.62	129	7.73	369
BMK_Unigene_147500	14	0.52	3	0.14	17	0.65	57	1.84	42	1.22	11	0.39	17	0.58	21	0.59	47	1.93	19	0.71	11	0.34	42	1.52	10	0.36	9	0.34	10	0.35	1	0.06	3	0.13	9	0.36	884	27.64	458	15.59	560	20.37	667	23.5	952	33.36	1447	47.89	39
BMK_Unigene_152831	523	33.37	590	37.88	318	20.04	1640	90.23	1828	92.21	913	54.25	1919	108.24	2533	121.46	731	51.85	2492	159.22	6974	355.25	3425	212.43	471	27.87	404	24.99	640	38	287	18.3	1308	75.03	252	16.18	322	17.38	238	13.99	248	15.54	422	25.54	369	22.31	344	19.6	162
BMK_Unigene_051490	8	0.46	4	0.23	14	0.79	4	0.2	2	0.09	6	0.32	733	36.99	254	10.9	47	2.98	15	0.86	261	11.92	16	0.89	220	11.66	15	0.83	183	9.72	154	8.79	130	6.67	41	2.36	188	9.08	187	9.84	177	9.93	117	6.35	153	8.28	315	16.08	1743
BMK_Unigene_144967	34	2.24	118	7.83	195	12.7	120	6.83	270	14.09	81	4.98	26	1.52	18	0.89	8	0.59	22	1.45	21	1.11	15	0.96	0	0	18	1.15	18	1.11	2	0.13	2	0.12	6	0.4	47	2.62	58	3.53	44	2.85	30	1.88	64	4	55	3.24	9
BMK_Unigene_149728	182	10.04	244	13.56	164	8.94	69	3.28	18	0.78	13	0.67	126	6.14	119	4.93	49	3	13	0.72	62	2.74	3	0.16	18	0.92	362	19.36	130	6.67	199	10.96	250	12.38	162	8.98	42	1.96	64	3.25	18	0.98	15	0.79	20	1.05	15	0.74	439
[truncated: 217 more columns]
