# Supplementary material
Source: MDPI journal article supplement (https://www.mdpi.com/1999-4907/15/4/618)
Supplement: s1 [file s1 › Supplementary Table S13.xlsx]

## Sheet: Sheet1
Supplementary Table S13: Annotations of 27 hub genes
gene	COG_class	COG_class_annotation	GO_annotation	KEGG_annotation	KOG_class	KOG_class_annotation	Pfam_annotation	Swissprot_annotation	TrEMBL_annotation	eggNOG_class	eggNOG_class_annotation	nr_annotation
BMK_Unigene_002469	--	--	--	--	--	--	--	--	Uncharacterized protein OS=Morus notabilis OX=981085 GN=L484_001734 PE=4 SV=1	--	--	uncharacterized protein LOC112489119 [Ziziphus jujuba]
BMK_Unigene_080501	--	--	Molecular Function: transcription regulatory region sequence-specific DNA binding (GO:0000976);; Molecular Function: DNA-binding transcription factor activity (GO:0003700);; Cellular Component: nucleus (GO:0005634);; Biological Process: response to auxin (GO:0009733);; Biological Process: cell differentiation (GO:0030154);; Molecular Function: sequence-specific DNA binding (GO:0043565);;	K09422|3.5e-166|zju:107407717|K09422 transcription factor MYB, plant | (RefSeq) myb-related protein 306-like	[K]	Transcription	Myb-like DNA-binding domain;; Myb-like DNA-binding domain	Myb-related protein 306 OS=Antirrhinum majus OX=4151 GN=MYB306 PE=2 SV=1	Myb-related protein 306, putative isoform 1 OS=Theobroma cacao OX=3641 GN=TCM_013983 PE=4 SV=1	--	--	myb-related protein 306-like [Ziziphus jujuba]
BMK_Unigene_073473	--	--	--	--	[R]	General function prediction only	C2H2-type zinc finger;; C2H2-type zinc finger;; Zinc-finger of C2H2 type	Zinc finger protein ZAT5 OS=Arabidopsis thaliana OX=3702 GN=ZAT5 PE=2 SV=1	Uncharacterized protein OS=Hevea brasiliensis OX=3981 GN=GH714_001962 PE=4 SV=1	S	Function unknown	zinc finger protein ZAT5-like [Ziziphus jujuba]
BMK_Unigene_154560	[T]	Signal transduction mechanisms	Molecular Function: ATP binding (GO:0005524);; Cellular Component: integral component of membrane (GO:0016021);; Molecular Function: ATPase activity (GO:0016887);;	K05681|1.5e-164|nta:107765868|K05681 ATP-binding cassette, subfamily G (WHITE), member 2 | (RefSeq) ABC transporter G family member 9-like	[Q]	Secondary metabolites biosynthesis, transport and catabolism	ABC-2 type transporter;; ABC transporter;; ABC-2 type transporter	ABC transporter G family member 22 OS=Arabidopsis thaliana OX=3702 GN=ABCG22 PE=1 SV=1	ABC transporter domain-containing protein OS=Fagus sylvatica OX=28930 GN=FSB_LOCUS16533 PE=4 SV=1	Q	Secondary metabolites biosynthesis, transport and catabolism	ABC transporter G family member 22-like isoform X1 [Ziziphus jujuba]
BMK_Unigene_078346	[O]	Posttranslational modification, protein turnover, chaperones	Molecular Function: metalloendopeptidase activity (GO:0004222);; Molecular Function: ATP binding (GO:0005524);; Cellular Component: integral component of membrane (GO:0016021);;	K03798|0.0e+00|zju:107417227|K03798 cell division protease FtsH [EC:3.4.24.-] | (RefSeq) ATP-dependent zinc metalloprotease FTSH 2, chloroplastic	[O]	Posttranslational modification, protein turnover, chaperones	Peptidase family M41;; ATPase family associated with various cellular activities (AAA);; AAA+ lid domain;; TIP49 P-loop domain;; AAA domain (dynein-related subfamily);; Holliday junction DNA helicase RuvB P-loop domain;; AAA domain (Cdc48 subfamily)	ATP-dependent zinc metalloprotease FTSH 2, chloroplastic OS=Oryza sativa subsp. japonica OX=39947 GN=FTSH2 PE=3 SV=1	Peptidase OS=Trema orientale OX=63057 GN=TorRG33x02_077630 PE=3 SV=1	O	Posttranslational modification, protein turnover, chaperones	ATP-dependent zinc metalloprotease FTSH 2, chloroplastic [Ziziphus jujuba]
BMK_Unigene_153424	[J]	Translation, ribosomal structure and biogenesis	Molecular Function: iron ion binding (GO:0005506);; Molecular Function: electron transfer activity (GO:0009055);;	K02967|4.1e-24|cme:CYME_CMT330C|K02967 small subunit ribosomal protein S2 | (RefSeq) mitochondrial ribosomal protein S2, mitochondrial precursor	[O]	Posttranslational modification, protein turnover, chaperones	Ribosomal protein S2;; DnaJ domain;; 4Fe-4S single cluster domain of Ferredoxin I;; 4Fe-4S single cluster domain	30S ribosomal protein S2, chloroplastic OS=Ostreococcus tauri OX=70448 GN=rps2 PE=3 SV=1	3Fe-4S ferredoxin OS=Parasponia andersonii OX=3476 GN=PanWU01x14_306390 PE=4 SV=1	O	Posttranslational modification, protein turnover, chaperones	37S ribosomal protein MRP4, mitochondrial [Oidium neolycopersici]
BMK_Unigene_079312	--	--	Molecular Function: DNA-binding transcription factor activity (GO:0003700);; Cellular Component: nucleus (GO:0005634);; Molecular Function: metal ion binding (GO:0046872);;	K12309|2.8e-91|lja:Lj3g3v0323160.1|K12309 beta-galactosidase [EC:3.2.1.23] | (RefSeq) Lj3g3v0323160.1; -	[R]	General function prediction only	Zinc finger, C2H2 type	Zinc finger protein MAGPIE OS=Arabidopsis thaliana OX=3702 GN=MGP PE=1 SV=1	Nucleic acid binding protein, putative isoform 1 OS=Theobroma cacao OX=3641 GN=TCM_041053 PE=4 SV=1	S	Function unknown	protein indeterminate-domain 9-like [Ziziphus jujuba]
BMK_Unigene_140716	[GR]	--	Cellular Component: cellular_component (GO:0005575);; Cellular Component: intracellular (GO:0005622);; Cellular Component: obsolete cell (GO:0005623);; Cellular Component: cytoplasm (GO:0005737);; Cellular Component: chloroplast (GO:0009507);; Cellular Component: plastid envelope (GO:0009526);; Cellular Component: plastid stroma (GO:0009532);; Cellular Component: plastid (GO:0009536);; Cellular C…	--	[R]	General function prediction only	--	CBBY-like protein OS=Arabidopsis thaliana OX=3702 GN=CBBY PE=1 SV=1	Haloacid dehalogenase-like hydrolase superfamily protein OS=Prunus dulcis OX=3755 GN=Prudu_014672 PE=4 SV=1	S	Function unknown	CBBY-like protein [Ziziphus jujuba]
BMK_Unigene_148349	[E]	Amino acid transport and metabolism	Biological Process: amino acid transmembrane transport (GO:0003333);; Cellular Component: integral component of membrane (GO:0016021);;	K03834|1.5e-126|zju:107410448|K03834 tyrosine-specific transport protein | (RefSeq) LOW QUALITY PROTEIN: uncharacterized protein LOC107410448	--	--	Tryptophan/tyrosine permease family;; Tryptophan/tyrosine permease family	--	Tryptophan/tyrosine permease OS=Trema orientale OX=63057 GN=TorRG33x02_027510 PE=4 SV=1	E	Amino acid transport and metabolism	LOW QUALITY PROTEIN: uncharacterized protein LOC107410448 [Ziziphus jujuba]
BMK_Unigene_080167	[E]	Amino acid transport and metabolism	Cellular Component: integral component of membrane (GO:0016021);; Molecular Function: transmembrane transporter activity (GO:0022857);;	K14638|4.7e-129|aof:109835602|K14638 solute carrier family 15 (peptide/histidine transporter), member 3/4 | (RefSeq) protein NRT1/ PTR FAMILY 6.4	[E]	Amino acid transport and metabolism	POT family;; Major Facilitator Superfamily	Protein NRT1/ PTR FAMILY 6.4 OS=Arabidopsis thaliana OX=3702 GN=NPF6.4 PE=1 SV=1	Proton-dependent oligopeptide transporter OS=Trema orientale OX=63057 GN=TorNPF40 PE=3 SV=1	E	Amino acid transport and metabolism	protein NRT1/ PTR FAMILY 6.4 [Ziziphus jujuba]
BMK_Unigene_151878	[T]	Signal transduction mechanisms	Molecular Function: ATP binding (GO:0005524);; Cellular Component: integral component of membrane (GO:0016021);; Molecular Function: ATPase activity (GO:0016887);;	K05681|2.4e-81|cme:CYME_CMS467C|K05681 ATP-binding cassette, subfamily G (WHITE), member 2 | (RefSeq) ATP-binding cassette, sub-family G, member 2	[Q]	Secondary metabolites biosynthesis, transport and catabolism	ABC-2 type transporter;; ABC transporter;; ABC-2 type transporter;; Rad17 P-loop domain	ABC transporter G family member 7 OS=Arabidopsis thaliana OX=3702 GN=ABCG7 PE=2 SV=1	ABC transporter-like OS=Parasponia andersonii OX=3476 GN=PanWU01x14_256510 PE=4 SV=1	Q	Secondary metabolites biosynthesis, transport and catabolism	ABC transporter G family member 7 [Ziziphus jujuba]
BMK_Unigene_141942	[C]	Energy production and conversion	Molecular Function: oxidoreductase activity (GO:0016491);;	--	--	--	Oxidoreductase NAD-binding domain	Fruit protein pKIWI502 OS=Actinidia deliciosa OX=3627 GN=pKIWI502 PE=2 SV=1	FAD-binding FR-type domain-containing protein OS=Carpinus fangiana OX=176857 GN=FH972_015796 PE=4 SV=1	--	--	fruit protein pKIWI502 [Ziziphus jujuba]
BMK_Unigene_082643	--	--	Cellular Component: cellular_component (GO:0005575);; Cellular Component: intracellular (GO:0005622);; Cellular Component: obsolete cell (GO:0005623);; Cellular Component: cytoplasm (GO:0005737);; Cellular Component: cytosol (GO:0005829);; Cellular Component: plasma membrane (GO:0005886);; Biological Process: transport (GO:0006810);; Biological Process: movement of cell or subcellular component (…	--	--	--	N-terminal C2 in EEIG1 and EHBP1 proteins	Protein PLASTID MOVEMENT IMPAIRED 1 OS=Arabidopsis thaliana OX=3702 GN=PMI1 PE=1 SV=1	C2 NT-type domain-containing protein OS=Morella rubra OX=262757 GN=CJ030_MR0G007974 PE=4 SV=1	S	Function unknown	protein PLASTID MOVEMENT IMPAIRED 1 [Ziziphus jujuba]
BMK_Unigene_146003	--	--	--	--	--	--	Protein of unknown function (DUF3727)	--	Uncharacterized protein OS=Malus baccata OX=106549 GN=C1H46_008309 PE=4 SV=1	S	Function unknown	uncharacterized protein LOC107425336 [Ziziphus jujuba]
BMK_Unigene_084074	[O]	Posttranslational modification, protein turnover, chaperones	Molecular Function: metalloendopeptidase activity (GO:0004222);; Molecular Function: ATP binding (GO:0005524);; Cellular Component: integral component of membrane (GO:0016021);;	K03798|0.0e+00|zju:107417908|K03798 cell division protease FtsH [EC:3.4.24.-] | (RefSeq) ATP-dependent zinc metalloprotease FTSH 12, chloroplastic isoform X1	[O]	Posttranslational modification, protein turnover, chaperones	ATPase family associated with various cellular activities (AAA);; Peptidase family M41;; AAA+ lid domain;; AAA domain (Cdc48 subfamily);; WAX2 C-terminal domain	ATP-dependent zinc metalloprotease FTSH 12, chloroplastic OS=Arabidopsis thaliana OX=3702 GN=FTSH12 PE=2 SV=2	AAA-type ATPase OS=Parasponia andersonii OX=3476 GN=PanWU01x14_052650 PE=3 SV=1	O	Posttranslational modification, protein turnover, chaperones	ATP-dependent zinc metalloprotease FTSH 12, chloroplastic isoform X1 [Ziziphus jujuba]
BMK_Unigene_077122	--	--	Molecular Function: thiol-dependent ubiquitin-specific protease activity (GO:0004843);; Biological Process: protein deubiquitination (GO:0016579);; Biological Process: ubiquitin-dependent ERAD pathway (GO:0030433);;	K18342|4.3e-09|cre:CHLREDRAFT_146838|K18342 OTU domain-containing protein 6 [EC:3.4.19.12] | (RefSeq) CPLD17; predicted protein	--	--	OTU-like cysteine protease	OVARIAN TUMOR DOMAIN-containing deubiquitinating enzyme 3 OS=Arabidopsis thaliana OX=3702 GN=OTU3 PE=1 SV=1	Ubiquitinyl hydrolase 1 OS=Juglans regia OX=51240 GN=LOC109004205 PE=4 SV=1	O	Posttranslational modification, protein turnover, chaperones	hypothetical protein FNV43_RR09715 [Rhamnella rubrinervis]
BMK_Unigene_079196	[V]	Defense mechanisms	Molecular Function: antiporter activity (GO:0015297);; Cellular Component: integral component of membrane (GO:0016021);; Molecular Function: xenobiotic transmembrane transporter activity (GO:0042910);;	K03327|1.4e-216|zju:107421055|K03327 multidrug resistance protein, MATE family | (RefSeq) protein DETOXIFICATION 40-like	[R]	General function prediction only	MatE;; MatE	Protein DETOXIFICATION 40 OS=Arabidopsis thaliana OX=3702 GN=DTX40 PE=1 SV=1	Protein DETOXIFICATION OS=Eucalyptus grandis OX=71139 GN=EUGRSUZ_D01316 PE=3 SV=1	L	Replication, recombination and repair	protein DETOXIFICATION 40-like [Ziziphus jujuba]
BMK_Unigene_155256	[HT]	--	Cellular Component: integral component of membrane (GO:0016021);;	K13457|3.9e-226|vvi:100252764|K13457 disease resistance protein RPM1 | (RefSeq) uncharacterized protein sll1770	[R]	General function prediction only	ABC1 family	Protein ACTIVITY OF BC1 COMPLEX KINASE 8, chloroplastic OS=Arabidopsis thaliana OX=3702 GN=ABC1K8 PE=2 SV=1	ABC1 domain-containing protein OS=Gossypium raimondii OX=29730 GN=B456_003G046300 PE=4 SV=1	S	Function unknown	protein ACTIVITY OF BC1 COMPLEX KINASE 8, chloroplastic [Ziziphus jujuba]
BMK_Unigene_144465	--	--	Molecular Function: DNA binding (GO:0003677);; Cellular Component: nucleus (GO:0005634);; Molecular Function: lipid binding (GO:0008289);;	K09338|8.4e-205|zju:107428556|K09338 homeobox-leucine zipper protein | (RefSeq) homeobox-leucine zipper protein ATHB-15	--	--	START domain;; MEKHLA domain	Homeobox-leucine zipper protein ATHB-15 OS=Arabidopsis thaliana OX=3702 GN=ATHB-15 PE=1 SV=1	Octamer-binding transcription factor OS=Trema orientale OX=63057 GN=TorRG33x02_156320 PE=3 SV=1	K	Transcription	homeobox-leucine zipper protein ATHB-15 [Ziziphus jujuba]
BMK_Unigene_149590	--	--	Molecular Function: DNA binding (GO:0003677);; Cellular Component: nucleus (GO:0005634);;	K09287|3.5e-46|smo:SELMODRAFT_110104|K09287 RAV-like factor | (RefSeq) hypothetical protein	--	--	B3 DNA binding domain	B3 domain-containing protein Os03g0120900 OS=Oryza sativa subsp. japonica OX=39947 GN=Os03g0120900 PE=2 SV=1	TF-B3 domain-containing protein OS=Vitis vinifera OX=29760 GN=VIT_02s0025g03000 PE=4 SV=1	K	Transcription	B3 domain-containing protein Os03g0120900-like [Ziziphus jujuba]
BMK_Unigene_079696	--	--	Biological Process: protein glycosylation (GO:0006486);; Cellular Component: integral component of membrane (GO:0016021);; Molecular Function: transferase activity, transferring glycosyl groups (GO:0016757);;	K18789|2.6e-106|psom:113322510|K18789 xylogalacturonan beta-1,3-xylosyltransferase [EC:2.4.2.41] | (RefSeq) probable glycosyltransferase At5g20260 isoform X1	[GMW]	--	Exostosin family	Probable glycosyltransferase At3g07620 OS=Arabidopsis thaliana OX=3702 GN=At3g07620 PE=3 SV=1	Exostosin domain-containing protein OS=Fagus sylvatica OX=28930 GN=FSB_LOCUS2626 PE=3 SV=1	--	--	probable glycosyltransferase At3g07620 [Ziziphus jujuba]
BMK_Unigene_145952	--	--	Molecular Function: molecular_function (GO:0003674);; Molecular Function: nucleic acid binding (GO:0003676);; Molecular Function: DNA binding (GO:0003677);; Molecular Function: DNA-binding transcription factor activity (GO:0003700);; Molecular Function: binding (GO:0005488);; Cellular Component: cellular_component (GO:0005575);; Cellular Component: intracellular (GO:0005622);; Cellular Component:…	K08835|9.3e-36|ppp:112289801|K08835 serine/threonine-protein kinase OSR1/STK39 [EC:2.7.11.1] | (RefSeq) serine/threonine-protein kinase 24-like	--	--	GAGA binding protein-like family	Protein BASIC PENTACYSTEINE1 OS=Arabidopsis thaliana OX=3702 GN=BPC1 PE=1 SV=1	Uncharacterized protein OS=Morus notabilis OX=981085 GN=L484_019276 PE=3 SV=1	S	Function unknown	protein BASIC PENTACYSTEINE2-like [Ziziphus jujuba]
BMK_Unigene_154441	[R]	General function prediction only	Molecular Function: catalytic activity (GO:0003824);; Molecular Function: metal ion binding (GO:0046872);;	K17732|1.1e-08|ini:109166392|K17732 mitochondrial-processing peptidase subunit beta [EC:3.4.24.64] | (RefSeq) probable mitochondrial-processing peptidase subunit beta, mitochondrial	[O]	Posttranslational modification, protein turnover, chaperones	Peptidase M16 inactive domain;; Insulinase (Peptidase family M16)	Stromal processing peptidase, chloroplastic OS=Pisum sativum OX=3888 GN=SPP PE=1 SV=2	Uncharacterized protein OS=Carpinus fangiana OX=176857 GN=FH972_014172 PE=4 SV=1	O	Posttranslational modification, protein turnover, chaperones	stromal processing peptidase, chloroplastic isoform X1 [Ziziphus jujuba]
BMK_Unigene_150610	[O]	Posttranslational modification, protein turnover, chaperones	Molecular Function: ATP binding (GO:0005524);; Cellular Component: cytoplasm (GO:0005737);; Biological Process: response to heat (GO:0009408);; Cellular Component: chloroplast thylakoid membrane (GO:0009535);; Molecular Function: heat shock protein binding (GO:0031072);; Biological Process: protein refolding (GO:0042026);; Molecular Function: metal ion binding (GO:0046872);; Molecular Function: u…	K03686|1.4e-178|zju:107408057|K03686 molecular chaperone DnaJ | (RefSeq) uncharacterized protein LOC107408057	[O]	Posttranslational modification, protein turnover, chaperones	DnaJ C terminal domain;; DnaJ central domain	Chaperone protein dnaJ A6, chloroplastic OS=Arabidopsis thaliana OX=3702 GN=DJA6 PE=2 SV=2	Molecular chaperone Hsp40/DnaJ family protein isoform 1 OS=Theobroma cacao OX=3641 GN=TCM_027249 PE=3 SV=1	O	Posttranslational modification, protein turnover, chaperones	uncharacterized protein LOC107408057 [Ziziphus jujuba]
BMK_Unigene_083307	[G]	Carbohydrate transport and metabolism	Molecular Function: alpha-amylase activity (GO:0004556);; Molecular Function: calcium ion binding (GO:0005509);; Biological Process: carbohydrate metabolic process (GO:0005975);;	K01176|0.0e+00|zju:107415886|K01176 alpha-amylase [EC:3.2.1.1] | (RefSeq) uncharacterized protein LOC107415886	[G]	Carbohydrate transport and metabolism	Alpha-amylase C-terminal beta-sheet domain;; Alpha amylase, catalytic domain	Alpha-amylase 3, chloroplastic OS=Arabidopsis thaliana OX=3702 GN=AMY3 PE=1 SV=1	1,4-alpha-D-glucan glucanohydrolase OS=Trema orientale OX=63057 GN=TorRG33x02_207570 PE=4 SV=1	G	Carbohydrate transport and metabolism	hypothetical protein FNV43_RR14548 [Rhamnella rubrinervis]
BMK_Unigene_153003	[H]	Coenzyme transport and metabolism	Molecular Function: prenyltransferase activity (GO:0004659);; Cellular Component: integral component of membrane (GO:0016021);; Biological Process: phylloquinone biosynthetic process (GO:0042372);;	K23094|1.1e-206|zju:107428571|K23094 2-carboxy-1,4-naphthoquinone phytyltransferase [EC:2.5.1.130] | (RefSeq) 2-carboxy-1,4-naphthoquinone phytyltransferase, chloroplastic	[S]	Function unknown	UbiA prenyltransferase family	2-carboxy-1,4-naphthoquinone phytyltransferase, chloroplastic OS=Arabidopsis thaliana OX=3702 GN=ABC4 PE=1 SV=2	2-carboxy-1,4-naphthoquinone phytyltransferase, chloroplastic-like isoform X1 OS=Juglans regia OX=51240 GN=LOC109014828 PE=3 SV=1	H	Coenzyme transport and metabolism	2-carboxy-1,4-naphthoquinone phytyltransferase, chloroplastic [Ziziphus jujuba]
BMK_Unigene_143155	[S]	Function unknown	Cellular Component: membrane (GO:0016020);;	K02221|5.4e-132|zju:107420131|K02221 YggT family protein | (RefSeq) ylmG homolog protein 2, chloroplastic	--	--	YGGT family	YlmG homolog protein 2, chloroplastic OS=Arabidopsis thaliana OX=3702 GN=YLMG2 PE=2 SV=1	Uncharacterized protein ycf19 OS=Morus notabilis OX=981085 GN=L484_018603 PE=4 SV=1	S	Function unknown	ylmG homolog protein 2, chloroplastic [Ziziphus jujuba]
