# Supplementary material
Source: MDPI journal article supplement (https://www.mdpi.com/1999-4907/15/4/618)
Supplement: s1 [file s1 › Supplementary Table S14.xlsx]

## Sheet: Sheet1
Supplementary Table S14: The qRT-PCR primer sequence information
No.	Gene name	Forward (5′-3′)	Reverse (5′-3′)
1	qActin	GACCTGCATTGGATGAGGAACTACC	CCCACAGTAAACTGAGCAGACACC
2	10GHO	GCGACCATTGAATCGGAGTAGCC	TGCTTGCCATTCCTGTGAGAACTG
3	At1g30700	TCTCCTACTGCTACTCCGTTTCCTC	TGGTTCGCTGCTTTAGTTCCTGAAG
4	BGLU12	AGCGACTGCCCAAATTTACCAAGG	GCGAGCGTCTGTGGTATAACTTCC
5	CSE	TCCCTCCCACTTCTCCACTGAAAG	TAGTACTCCTCTTCCGGCATGTAGC
6	CYP73A14	GACTTGGAGCCAGTTACCGAATACG	GTTCTCGCCATCACCATCTCTAAGC
7	CYP98A2	CCGCCGCCAAGTTTAGCAGAG	CGAATGGGACGAAGAGCCTCAAG
8	OMT1	CCACAGAGCAGTTGAGCACAGAG	GAGAGCAGGTCCAGGAACAAAGC
9	PAL1	CGGTGCGACTTCACATAGGAGAAC	GCTGCTCTTGCTGCTGAGTTAGG
10	PER51	TCAAAGCCAAAGCCGCAGTCG	CCGTCCAATCTTCCCAACTCAACC
11	RCA	CGTGACGGTCGTATGGAGAAGTTC	ATCGGCAACATTGTCGGTCCTG
12	SNL6	TGGCTGCACAGACAACGATACAC	CAAGGTGGTTGGGCTGGCTATG
13	TKPR2	GAGTTCCAGCCTTATGTCCGTAGC	GCCGTCCAACCCAGTCCAAATAAG
14	GGT3	ACCTGGTGGTAGACCCTTGGATTC	GTTCTTGGAGGCAGTGGTGGTATG
15	MYC2	GCCGAAAGATCCTGAAGAGCATCC	AGAGCGGGTGAGGGACATTACG
16	PAP14	ATGCGTGTGAGAGTTGCGTGATAG	GGGAGATATTTGGGCAAGGCAGAC
17	XYl2	CGAGTTGTAGTAGGCTGGCATGTG	CACCACCAAAGGCATCAATGAGAAC
